# Supplementary material for: Oncometabolite D-2-hydroxyglutarate - dependent metabolic reprogramming induces skeletal muscle atrophy during cancer cachexia
Source: Research Square preprint supplement (doi:10.21203/rs.3.rs-1246702/v1), 2022-01-27
Supplement: Supplementary file 1 [file 8f207e74dc7f959a0032dd96.xlsx]

## Sheet: Sheet1
				Summary			mRNA expression
Selection	MyList	Gene ID	Synonyms	Entrez Gene Summary	GeneCards Summary	UniProtKB/Swiss-Prot Summary	heart	skeletal muscle	kidney	liver	Description	Gene Location	Type	Homologene Gene Tax ID	Type of Gene	Gene Summary	Biological Process (GO)	GOSlim (Ontology)	Cellular Component (GO)	Molecular Function (GO)	Kinase Class (UniProt)	Protein Function (Protein Atlas)	InterPro	Subcellular Location (Protein Atlas)	Secreted (UniProt)	Secreted (Protein Altas)	Transmembrane (UniProt)	Membrane (Protein Altas)	Plasma (Protein Altas)	Appris (Ensembl)	Transmembrane (TMHMM)	JAX	Orphanet	OMIM	Pathogenic LoF (ClinVar)	dbGap (NCBI)	GWAS (NHGRI-EBI)	Developmental Disorders (DDG2P)	Variations (Ensembl)	Human Phenotype Ontology (HPO)	Drug (DrugBank)	Disease and gene associations (DisGeNET)	Gene RIF (NCBI)	Pubmed Count	Isoforms ID Map	Tissue Specificity (TiGER)	RNA Tissue Category (Protein Atlas)	Protein Expression Normal (Protein Atlas)	Protein Expression Cancer (Protein Atlas)
1	AKT1	207	AKT|PKB|PKB-ALPHA|PRKBA|RAC|RAC-ALPHA	The serine-threonine protein kinase encoded by the AKT1 gene is catalytically inactive in serum-starved primary and immortalized fibroblasts. AKT1 and the related AKT2 are activated by platelet-derived growth factor. The activation is rapid and specific, and it is abrogated by mutations in the pleckstrin homology domain of AKT1. It was shown that the activation occurs through phosphatidylinositol…	AKT1 (AKT Serine/Threonine Kinase 1) is a Protein Coding gene. Diseases associated with AKT1 include Proteus Syndrome and Cowden Syndrome 6. Among its related pathways are Regulation of TP53 Activity through Acetylation and Association Between Physico-Chemical Features and Toxicity Associated Pathways. Gene Ontology (GO) annotations related to this gene include identical protein binding and prote…	AKT1 is one of 3 closely related serine/threonine-protein kinases (AKT1, AKT2 and AKT3) called the AKT kinase, and which regulate many processes including metabolism, proliferation, cell survival, growth and angiogenesis (PubMed:15526160, PubMed:11882383, PubMed:21620960, PubMed:21432781). This is mediated through serine and/or threonine phosphorylation of a range of downstream substrates (PubMed…	52,62	38,48	51,58	55,56	AKT serine/threonine kinase 1	chr14:104795748-104769349	symbol	H. sapiens	protein-coding	This gene encodes one of the three members of the human AKT serine-threonine protein kinase family which are often referred to as protein kinase B alpha, beta, and gamma. These highly similar AKT proteins all have an N-terminal pleckstrin homology domain, a serine/threonine-specific kinase domain and a C-terminal regulatory domain. These proteins are phosphorylated by phosphoinositide 3-kinase (P…	GO:0100002 negative regulation of protein kinase activity by protein phosphorylation;GO:1990418 response to insulin-like growth factor stimulus;GO:0010748 negative regulation of plasma membrane long-chain fatty acid transport	[GO:0003674] molecular_function; [GO:0043167] ion binding; [GO:0008150] biological_process; [GO:0006464] cellular protein modification process; [GO:0016301] kinase activity; [GO:0007165] signal transduction; [GO:0007049] cell cycle; [GO:0000278] mitotic cell cycle; [GO:0006810] transport; [GO:0055085] transmembrane transport; [GO:0034641] cellular nitrogen compound metabolic process; [GO:0009058]…	GO:0036064 ciliary basal body;GO:0005819 spindle;GO:0005911 cell-cell junction	GO:0030235 nitric-oxide synthase regulator activity;GO:0032794 GTPase activating protein binding;GO:0043325 phosphatidylinositol-3,4-bisphosphate binding	AGC Ser/Thr protein kinase family	Predicted intracellular proteins; Disease related genes; Cancer-related genes:Candidate cancer biomarkers; Cancer-related genes:Mutational cancer driver genes; Kinases:AGC Ser/Thr protein kinases; Enzymes; Potential drug targets; ENZYME proteins:Transferases; RAS pathway related proteins; Cancer-related genes:Mutated cancer genes	[IPR000719] Protein kinase domain; [IPR000961] AGC-kinase, C-terminal; [IPR001849] Pleckstrin homology domain; [IPR008271] Serine/threonine-protein kinase, active site; [IPR011009] Protein kinase-like domain superfamily; [IPR011993] PH-like domain superfamily; [IPR017441] Protein kinase, ATP binding site; [IPR017892] Protein kinase, C-terminal; [IPR034676] Protein kinase B alpha, catalytic domain…	Nucleoplasm (reliability']); Additional: Microtubules								MP:0005370 liver/biliary system phenotype; MP:0005385 cardiovascular system phenotype; MP:0010768 mortality/aging; MP:0005369 muscle phenotype; MP:0005376 homeostasis/metabolism phenotype; MP:0005384 cellular phenotype; MP:0005378 growth/size/body region phenotype; MP:0005386 behavior/neurological phenotype; MP:0005381 digestive/alimentary phenotype; MP:0005387 immune system phenotype; MP:0002006…	[ORPHA:201] COWDEN SYNDROME; [ORPHA:744] Proteus syndrome	OMIM ID:164730 Akt serine/threonine kinase 1	Proteus syndrome; Cutaneous melanoma; Cowden syndrome 6		Carcinoma, Endometrioid;Endometrial Neoplasms	[176920] Proteus syndrome	Adenocarcinoma of prostate: likely pathogenic,pathogenic; Adenocarcinoma of stomach: likely pathogenic,pathogenic; Breast adenocarcinoma: likely pathogenic,pathogenic; Cowden syndrome 6: pathogenic; Carcinoma of colon: likely pathogenic,pathogenic; Clinvar: phenotype not specified: likely pathogenic; Cutaneous melanoma: likely pathogenic; Endometrial endometrioid adenocarcinoma, variant with squa…	HP:0004472:Mandibular hyperostosis; HP:0007403:Hypertrophy of skin of soles; HP:0010516:Thymus hyperplasia; HP:0100521:Neoplasm of the thymus; HP:0010816:Epidermal nevus; HP:0007483:Depigmentation/hyperpigmentation of skin; HP:0004418:Thrombophlebitis; HP:0012871:Varicocele; HP:0005465:Facial hyperostosis; HP:0100730:Bronchogenic cyst; HP:0004481:Progressive macrocephaly; HP:0009594:Retinal hamar…	ATP; Arsenic trioxide; Genistein; Inositol 1,3,4,5-Tetrakisphosphate; Resveratrol; Archexin; Enzastaurin; Perifosine; N-[2-(5-methyl-4H-1,2,4-triazol-3-yl)phenyl]-7H-pyrrolo[2,3-d]pyrimidin-4-amine; 5-(5-chloro-7H-pyrrolo[2,3-d]pyrimidin-4-yl)-4,5,6,7-tetrahydro-1H-imidazo[4,5-c]pyridine	COWDEN SYNDROME 6; Collagen nevus of skin; Dental cyst; Hypertrophy of skin of soles; Mandibular hyperostosis; Central odontogenic fibroma; Glandular papilloma; Infected cyst; Roux-en-y Anastomosis Site; SCHIZOPHRENIA 8 (disorder); Sialadenoma papilliferum; Depigmentation/hyperpigmentation of skin; Feline Lymphoma; Gynandroblastoma; Intraductal papilloma of breast; Salivary Gland Epithelial Myoep…	2778	3250	[{"UniProt":"P31749","EnsemblGene":["ENSG00000142208"],"RefSeq":[["XM_005267401","XP_005267458"]],"SwissProt":["AKT1_HUMAN"]},{"UniProt":"B0LPE5","RefSeq":[["NM_001014431","NP_001014431","REVIEWED"],["NM_001014432","NP_001014432","REVIEWED"],["NM_005163","NP_005154","REVIEWED"],["XM_005267401","XP_005267458"]],"SwissProt":["B0LPE5_HUMAN"]},{"UniProt":"B3KVH4","RefSeq":[["NM_005163","NP_005154","R…		Distribution: Detected in all; Specificity: Low tissue specificity	Ubiquitous nuclear expression.; antibody: Most normal cells showed moderate to strong nuclear positivity.	Antibody: Most malignancies cells showed moderate to strong nuclear positivity.
1	ALDH2	217	ALDH-E2|ALDHI|ALDM	This protein belongs to the aldehyde dehydrogenase family of proteins. Aldehyde dehydrogenase is the second enzyme of the major oxidative pathway of alcohol metabolism. Two major liver isoforms of aldehyde dehydrogenase, cytosolic and mitochondrial, can be distinguished by their electrophoretic mobilities, kinetic properties, and subcellular localizations. Most Caucasians have two major isozymes,…	ALDH2 (Aldehyde Dehydrogenase 2 Family Member) is a Protein Coding gene. Diseases associated with ALDH2 include Alcohol Sensitivity, Acute and Alcohol Dependence. Among its related pathways are Glucose metabolism and Neurotransmitter Clearance In The Synaptic Cleft. Gene Ontology (GO) annotations related to this gene include oxidoreductase activity and aldehyde dehydrogenase (NAD) activity. An im…		115115	91,84	125103	241208	aldehyde dehydrogenase 2 family member	chr12:111766933-111817532	symbol	H. sapiens	protein-coding	This protein belongs to the aldehyde dehydrogenase family of proteins. Aldehyde dehydrogenase is the second enzyme of the major oxidative pathway of alcohol metabolism. Two major liver isoforms of aldehyde dehydrogenase, cytosolic and mitochondrial, can be distinguished by their electrophoretic mobilities, kinetic properties, and subcellular localizations. Most Caucasians have two major isozymes,…	GO:0006069 ethanol oxidation;GO:0006068 ethanol catabolic process;GO:0034310 primary alcohol catabolic process	[GO:0008150] biological_process; [GO:0003674] molecular_function; [GO:0016491] oxidoreductase activity; [GO:0005575] cellular_component; [GO:0005737] cytoplasm; [GO:0005622] intracellular; [GO:0043226] organelle; [GO:0005739] mitochondrion; [GO:0006091] generation of precursor metabolites and energy; [GO:0005576] extracellular region; [GO:0005615] extracellular space; [GO:0005975] carbohydrate me…	GO:0005759 mitochondrial matrix;GO:0044429 mitochondrial part;GO:0005739 mitochondrion	GO:0004030 aldehyde dehydrogenase [NAD(P)+] activity;GO:0043878 glyceraldehyde-3-phosphate dehydrogenase (NAD+) (non-phosphorylating) activity;GO:0004029 aldehyde dehydrogenase (NAD) activity		ENZYME proteins:Oxidoreductases; Predicted intracellular proteins; Enzymes; FDA approved drug targets:Small molecule drugs	[IPR015590] Aldehyde dehydrogenase domain; [IPR016160] Aldehyde dehydrogenase, cysteine active site; [IPR016161] Aldehyde/histidinol dehydrogenase; [IPR016162] Aldehyde dehydrogenase, N-terminal; [IPR016163] Aldehyde dehydrogenase, C-terminal; [IPR029510] Aldehyde dehydrogenase, glutamic acid active site						yes			MP:0005367 renal/urinary system phenotype; MP:0005370 liver/biliary system phenotype; MP:0005385 cardiovascular system phenotype; MP:0010768 mortality/aging; MP:0005369 muscle phenotype; MP:0005376 homeostasis/metabolism phenotype; MP:0005384 cellular phenotype; MP:0005378 growth/size/body region phenotype; MP:0005386 behavior/neurological phenotype; MP:0005387 immune system phenotype; MP:0002006…		OMIM ID:100650 Aldehyde dehydrogenase 2 family		Arterial Pressure;Blood Pressure	Alcohol Drinking;Alcoholism;Biomarkers;Body Mass Index;Coronary Disease;Drinking Behavior;Embolism;Erythrocyte Count;Erythrocyte Indices;Esophageal Neoplasms;Hemoglobins;Intracranial Aneurysm;Stroke;Triglycerides;alpha 1-Antitrypsin;gamma-Glutamyltransferase		Acute alcohol sensitivity: drug response,protective,risk factor; Alcohol consumption (drinkers vs non-drinkers): drug response,protective,risk factor; Alcohol consumption (maxi-drinks): drug response,protective,risk factor; Alcohol dependence: drug response,protective,risk factor; Body mass index: drug response,protective,risk factor; Coronary heart disease: drug response,protective,risk factor; …	HP:0001033:Facial flushing after alcohol intake; HP:0003533:Reduced acetaldehyde dehydrogenase activity; HP:0000006:Autosomal dominant inheritance	NADH; Guanidine; Disulfiram; Daidzin; Crotonaldehyde	ALCOHOL SENSITIVITY, ACUTE; Anginal attack; CHLORPROPAMIDE-ALCOHOL FLUSHING; ESOPHAGEAL CANCER, ALCOHOL-RELATED, SUSCEPTIBILITY TO; Facial flushing after alcohol intake; General discomfort; HANGOVER, SUSCEPTIBILITY TO (finding); SUBLINGUAL NITROGLYCERIN, SUSCEPTIBILITY TO POOR RESPONSE TO; Multiple lacunar infarcts; Obesity cardiomyopathy; alcohol flush reaction; Alcoholic Neuropathy; response to…	594	663	[{"UniProt":"P05091","EnsemblGene":["ENSG00000111275"],"SwissProt":["ALDH2_HUMAN"]},{"UniProt":"A0A384NPN7","RefSeq":[["NM_000690","NP_000681","REVIEWED"]],"SwissProt":["A0A384NPN7_HUMAN"]}]		Distribution: Detected in all; Specificity: Tissue enhanced	Cytoplasmic expression in several tissues.; antibody: Adrenocortical cells and renal tubules displayed strong cytoplasmic staining. Respiratory epithelia, intestine, Leydig cells and gall bladder were moderately positive with additional membranous staining in stomach and urothelium. Remaining normal tissues were weakly stained or negative.	Antibody: Few cases of malignant melanomas, lung and pancreatic cancers displayed moderate to strong cytoplasmic staining. Rare cases of malignant gliomas, colorectal, breast, ovarian and stomach cancers were moderately positive. Remaining cancer tissues were weakly stained or negative.
1	AR	367	AIS|AR8|DHTR|HUMARA|HYSP1|KD|NR3C4|SBMA|SMAX1|TFM	The androgen receptor gene is more than 90 kb long and codes for a protein that has 3 major functional domains: the N-terminal domain, DNA-binding domain, and androgen-binding domain. The protein functions as a steroid-hormone activated transcription factor. Upon binding the hormone ligand, the receptor dissociates from accessory proteins, translocates into the nucleus, dimerizes, and then stimul…	AR (Androgen Receptor) is a Protein Coding gene. Diseases associated with AR include Androgen Insensitivity, Partial and Spinal And Bulbar Muscular Atrophy, X-Linked 1. Among its related pathways are Regulation of Wnt-mediated beta catenin signaling and target gene transcription and Signal transduction_PKA signaling. Gene Ontology (GO) annotations related to this gene include DNA-binding transcri…	Steroid hormone receptors are ligand-activated transcription factors that regulate eukaryotic gene expression and affect cellular proliferation and differentiation in target tissues. Transcription factor activity is modulated by bound coactivator and corepressor proteins like ZBTB7A that recruits NCOR1 and NCOR2 to the androgen response elements/ARE on target genes, negatively regulating androgen…	16 23	15 14	11 15	30 35	androgen receptor	chrX:67544021-67730619	symbol	H. sapiens	protein-coding	The androgen receptor gene is more than 90 kb long and codes for a protein that has 3 major functional domains: the N-terminal domain, DNA-binding domain, and androgen-binding domain. The protein functions as a steroid-hormone activated transcription factor. Upon binding the hormone ligand, the receptor dissociates from accessory proteins, translocates into the nucleus, dimerizes, and then stimul…	GO:0019102 male somatic sex determination;GO:0060514 prostate induction;GO:0060515 prostate field specification	[GO:0005575] cellular_component; [GO:0005622] intracellular; [GO:0043226] organelle; [GO:0005634] nucleus; [GO:0005737] cytoplasm; [GO:0003674] molecular_function; [GO:0043167] ion binding; [GO:0008150] biological_process; [GO:0034641] cellular nitrogen compound metabolic process; [GO:0009058] biosynthetic process; [GO:0003677] DNA binding; [GO:0003700] DNA-binding transcription factor activity; …	GO:0016607 nuclear speck;GO:0016604 nuclear body;GO:0044451 nucleoplasm part	GO:0070974 POU domain binding;GO:0005497 androgen binding;GO:0001225 RNA polymerase II transcription coactivator binding		Predicted intracellular proteins; FDA approved drug targets:Small molecule drugs; Disease related genes; Transcription factors:Zinc-coordinating DNA-binding domains; Nuclear receptors; Cancer-related genes:Candidate cancer biomarkers; Cancer-related genes:Mutational cancer driver genes	[IPR000536] Nuclear hormone receptor, ligand-binding domain; [IPR001103] Androgen receptor; [IPR001628] Zinc finger, nuclear hormone receptor-type; [IPR013088] Zinc finger, NHR/GATA-type; [IPR035500] Nuclear hormone receptor-like domain superfamily	Mitochondria (reliability'])					yes			MP:0005367 renal/urinary system phenotype; MP:0005370 liver/biliary system phenotype; MP:0005385 cardiovascular system phenotype; MP:0005369 muscle phenotype; MP:0005376 homeostasis/metabolism phenotype; MP:0005384 cellular phenotype; MP:0005378 growth/size/body region phenotype; MP:0005386 behavior/neurological phenotype; MP:0005381 digestive/alimentary phenotype; MP:0005387 immune system phenot…	[ORPHA:99429] Complete androgen insensitivity syndrome; [ORPHA:481] Kennedy disease; [ORPHA:90797] Partial androgen insensitivity syndrome; [ORPHA:95706] Posterior hypospadias	OMIM ID:313700 Androgen receptor	Androgen resistance syndrome; Bulbo-spinal atrophy X-linked; Aplasia of the uterus; Absent axillary hair; Female external genitalia in individual with 46,XY karyotype; Absent pubic hair; Gynaecological; Partial androgen insensitivity syndrome; Malignant tumor of prostate; Prostate cancer susceptibility; Hypospadias 1, X-linked; Prostate cancer, somatic; Androgen insensitivity, partial, with breas…	Blood Coagulation Factors;Citalopram;Triglycerides	Alopecia;Cholesterol, LDL;Prostatic Neoplasms;Sleep	[300068] ANDROGEN INSENSITIVITY SYNDROME; [313200] Spinal and Bulbar Muscular Atrophy		HP:0010785:Gonadal neoplasm; HP:0008655:Aplasia/Hypoplasia of the fallopian tube; HP:0040314:Blind vagina; HP:0002550:Absent facial hair; HP:0002555:Absent pubic hair; HP:0012873:Absent vas deferens; HP:0000051:Perineal hypospadias; HP:0000066:Labial hypoplasia; HP:0002221:Absent axillary hair; HP:0010458:Female pseudohermaphroditism; HP:0000030:Testicular gonadoblastoma; HP:0000029:Testicular at…	Diethylstilbestrol; Levonorgestrel; Progesterone; Spironolactone; Flutamide; Oxandrolone; Fluphenazine; Testosterone; Mitotane; Estrone; Nilutamide; Tamoxifen; Norethisterone; Drostanolone; Norgestimate; Nandrolone phenpropionate; Ketoconazole; Acetophenazine; Bicalutamide; Fluoxymesterone; Drospirenone; Danazol; Testosterone propionate; Oxybenzone; 1-Testosterone; Boldenone; Calusterone; Pericia…	ANDROGEN INSENSITIVITY, PARTIAL, WITH BREAST CANCER; Acinar cell cystadenoma; Atrophy, Muscular, Spinobulbar; Bulbospinal neuronopathy, X-linked recessive; Congenital hernia; Disorder of male reproductive system; Female Virilization; Genital Diseases, Male; Gonadal neoplasm; Hypospadias 1, X-Linked; Incomplete testicular feminization syndrome; Langerhans cell histiocytosis of skin; Nodulocystic a…	1906	2363	[{"UniProt":"A0A087WUX9","EnsemblGene":["ENSG00000169083"],"EnsemblTrans":[["ENST00000613054","ENSP00000479013",""]],"RefSeq":[["NM_001348064","NP_001334993","REVIEWED"]],"UCSC":["uc064zqx.1"],"SwissProt":["A0A087WUX9_HUMAN"]},{"UniProt":"P10275","EnsemblGene":["ENSG00000169083"],"RefSeq":[["NM_001348064","NP_001334993","REVIEWED"]],"UCSC":["uc011mpf.2"],"SwissProt":["ANDR_HUMAN"]},{"UniProt":"F1…	mammary_gland;prostate	Distribution: Detected in many; Specificity: Tissue enhanced	antibody: Strong nuclear immunoreactivity was observed in nuclei of breast, epididymis and seminal vesicle. Nuclear staining of moderate intensity was also observed in skin, fallopian tube and endometrial stroma. Remaining normal tissues were negative.; Nuclear expression in several tissues, mainly in reproductive organs.	Antibody: Among tumors, modeate to strong nuclear immunoreactivity was observed in most prostate carcinomas and a few breast-, endometrial- and skin cancers. Remaining malignant tissues were in general negative.
1	ARHGEF12	23365	LARG|PRO2792	Rho GTPases play a fundamental role in numerous cellular processes that are initiated by extracellular stimuli working through G protein-coupled receptors. The encoded protein may form a complex with G proteins and stimulate Rho-dependent signals. This protein has been observed to form a myeloid/lymphoid fusion partner in acute myeloid leukemia. Three transcript variants encoding different isofor…	ARHGEF12 (Rho Guanine Nucleotide Exchange Factor 12) is a Protein Coding gene. Diseases associated with ARHGEF12 include Leukemia and Giant Axonal Neuropathy. Among its related pathways are Guidance Cues and Growth Cone Motility and Signaling by GPCR. Gene Ontology (GO) annotations related to this gene include GTPase activator activity and G protein-coupled receptor binding. An important paralog …	May play a role in the regulation of RhoA GTPase by guanine nucleotide-binding alpha-12 (GNA12) and alpha-13 (GNA13). Acts as guanine nucleotide exchange factor (GEF) for RhoA GTPase and may act as GTPase-activating protein (GAP) for GNA12 and GNA13. ARHGC_HUMAN,Q9NZN5	38 55	38 47	45 64	40 50	Rho guanine nucleotide exchange factor 12	chr11:120336276-120489937	symbol	H. sapiens	protein-coding	Rho GTPases play a fundamental role in numerous cellular processes that are initiated by extracellular stimuli working through G protein-coupled receptors. The encoded protein may form a complex with G proteins and stimulate Rho-dependent signals. This protein has been observed to form a myeloid/lymphoid fusion partner in acute myeloid leukemia. Three transcript variants encoding different isofor…	GO:0007266 Rho protein signal transduction;GO:0051056 regulation of small GTPase mediated signal transduction;GO:0007265 Ras protein signal transduction	[GO:0007165] signal transduction; [GO:0008150] biological_process; [GO:0003674] molecular_function; [GO:0005575] cellular_component; [GO:0005737] cytoplasm; [GO:0005622] intracellular; [GO:0019899] enzyme binding; [GO:0030234] enzyme regulator activity; [GO:0005829] cytosol; [GO:0043226] organelle; [GO:0005576] extracellular region; [GO:0005615] extracellular space; [GO:0008219] cell death	GO:0070062 extracellular exosome;GO:1903561 extracellular vesicle;GO:0043230 extracellular organelle	GO:0005089 Rho guanyl-nucleotide exchange factor activity;GO:0005088 Ras guanyl-nucleotide exchange factor activity;GO:0017048 Rho GTPase binding		Predicted intracellular proteins; Disease related genes; Cancer-related genes	[IPR000219] Dbl homology (DH) domain; [IPR001331] Guanine-nucleotide dissociation stimulator, CDC24, conserved site; [IPR001478] PDZ domain; [IPR001849] Pleckstrin homology domain; [IPR011993] PH-like domain superfamily; [IPR015212] Regulator of G protein signalling-like domain; [IPR035899] Dbl homology (DH) domain superfamily; [IPR036034] PDZ superfamily; [IPR036305] RGS domain superfamily; [IPR…	Cytosol;Plasma membrane (reliability']); Additional: Nucleoplasm								MP:0005385 cardiovascular system phenotype; MP:0010768 mortality/aging; MP:0005369 muscle phenotype; MP:0005376 homeostasis/metabolism phenotype; MP:0005384 cellular phenotype; MP:0005387 immune system phenotype; MP:0003631 nervous system phenotype; MP:0005397 hematopoietic system phenotype		OMIM ID:604763 Rho guanine nucleotide exchange factor 12			Attention Deficit Disorder with Hyperactivity;Glaucoma, Open-Angle;Intraocular Pressure					Lepidic Predominant Adenocarcinoma; Shwachman syndrome; Low Tension Glaucoma; Weight Gain; Glaucoma, Open-Angle; Mean blood pressure; Tonometry; Intraocular pressure disorder; Glaucoma, Primary Open Angle; Heart Diseases; Hyperinsulinism; Intelligence; Glaucoma; Systolic Pressure; Anemia; Precursor Cell Lymphoblastic Leukemia Lymphoma; Metabolic Syndrome X; Acute lymphocytic leukemia; Coronary Ar…	31	81	[{"UniProt":"E9PMR6","EnsemblGene":["ENSG00000196914"],"EnsemblTrans":[["ENST00000532993","ENSP00000432984",""]],"RefSeq":[["NM_001301084","NP_001288013","REVIEWED"],["XM_011542720","XP_011541022","MODEL"],["XM_017017421","XP_016872910","MODEL"]],"UCSC":["uc009zau.2"],"SwissProt":["E9PMR6_HUMAN"]},{"UniProt":"Q9NZN5","EnsemblGene":["ENSG00000196914"],"RefSeq":[["NM_001301084","NP_001288013","REVI…		Distribution: Detected in all; Specificity: Low tissue specificity	antibody: Most normal tissues showed moderate cytoplasmic positivity with additional nuclear staining in rare cases. The liver, salivary glands, CNS and lymphoid tissues were weakly stained or negative.; Mainly cytoplasmic expression in several different cell types, including rare cases of nuclear expression.	Antibody: Prostate, testicular, colorectal and breast cancers displayed moderate cytoplasmic and sometimes nuclear positivity. Remaining cancers were weakly stained or negative.
1	ARNT	405	HIF-1-beta|HIF-1beta|HIF1-beta|HIF1B|HIF1BETA|TANGO|bHLHe2	This gene encodes a protein containing a basic helix-loop-helix domain and two characteristic PAS domains along with a PAC domain. The encoded protein binds to ligand-bound aryl hydrocarbon receptor and aids in the movement of this complex to the nucleus, where it promotes the expression of genes involved in xenobiotic metabolism. This protein is also a co-factor for transcriptional regulation by…	ARNT (Aryl Hydrocarbon Receptor Nuclear Translocator) is a Protein Coding gene. Diseases associated with ARNT include Hypoxia and Familial Isolated Hypoparathyroidism. Among its related pathways are HIF1Alpha Pathway and Immune response IL-23 signaling pathway. Gene Ontology (GO) annotations related to this gene include DNA-binding transcription factor activity and protein heterodimerization acti…	Required for activity of the Ah (dioxin) receptor. This protein is required for the ligand-binding subunit to translocate from the cytosol to the nucleus after ligand binding. The complex then initiates transcription of genes involved in the activation of PAH procarcinogens. The heterodimer binds to core DNA sequence 5'-TACGTG-3' within the hypoxia response element (HRE) of target gene promoters …	30 34	32 45	29 38	30 28	aryl hydrocarbon receptor nuclear translocator	chr1:150876737-150809713	symbol	H. sapiens	protein-coding	This gene encodes a protein containing a basic helix-loop-helix domain and two characteristic PAS domains along with a PAC domain. The encoded protein binds to ligand-bound aryl hydrocarbon receptor and aids in the movement of this complex to the nucleus, where it promotes the expression of genes involved in xenobiotic metabolism. This protein is also a co-factor for transcriptional regulation by…	GO:0046886 positive regulation of hormone biosynthetic process;GO:0043619 regulation of transcription from RNA polymerase II promoter in response to oxidative stress;GO:0033235 positive regulation of protein sumoylation	[GO:0008150] biological_process; [GO:0034641] cellular nitrogen compound metabolic process; [GO:0009058] biosynthetic process; [GO:0005575] cellular_component; [GO:0005622] intracellular; [GO:0043226] organelle; [GO:0005634] nucleus; [GO:0005737] cytoplasm; [GO:0003674] molecular_function; [GO:0003700] DNA-binding transcription factor activity; [GO:0032991] protein-containing complex; [GO:0007165…	GO:0090575 RNA polymerase II transcription factor complex;GO:0044798 nuclear transcription factor complex;GO:0005667 transcription factor complex	GO:0017162 aryl hydrocarbon receptor binding;GO:0004879 nuclear receptor activity;GO:0098531 transcription factor activity, direct ligand regulated sequence-specific DNA binding		Transcription factors:Basic domains; Cancer-related genes:Candidate cancer biomarkers; Predicted intracellular proteins	[IPR000014] PAS domain; [IPR001067] Nuclear translocator; [IPR001610] PAC motif; [IPR011598] Myc-type, basic helix-loop-helix (bHLH) domain; [IPR013767] PAS fold; [IPR035965] PAS domain superfamily; [IPR036638] Helix-loop-helix DNA-binding domain superfamily	Nuclear bodies;Nucleoplasm (reliability'])								MP:0005385 cardiovascular system phenotype; MP:0010768 mortality/aging; MP:0005376 homeostasis/metabolism phenotype; MP:0005384 cellular phenotype; MP:0005378 growth/size/body region phenotype; MP:0005387 immune system phenotype; MP:0005389 reproductive system phenotype; MP:0003631 nervous system phenotype; MP:0005397 hematopoietic system phenotype; MP:0005379 endocrine/exocrine gland phenotype; …		OMIM ID:126110 Aryl hydrocarbon receptor nuclear translocator		Platelet Function Tests						Nevus, Intradermal; Chronic respiratory disease due to Mycoplasma gallisepticum; Color Blindness, Blue; Nocturia; Malignant melanoma of skin of lower limb; Malignant melanoma of skin of upper limb; L2 Acute Lymphoblastic Leukemia; Acute colitis; Neoplasms, Experimental; Dysplastic Nevus; Abortion, Tubal; Early Pregnancy Loss; Spontaneous abortion; IMMUNE SUPPRESSION; Familial lichen amyloidosis; …	111	263	[{"UniProt":"P27540","EnsemblGene":["ENSG00000143437"],"RefSeq":[["NM_001197325","NP_001184254","REVIEWED"]],"SwissProt":["ARNT_HUMAN"]},{"UniProt":"A8K6P0","RefSeq":[["NM_001197325","NP_001184254","REVIEWED"]],"SwissProt":["A8K6P0_HUMAN"]},{"UniProt":"B0AZM1","RefSeq":[["NM_178427","NP_848514","REVIEWED"]],"SwissProt":["B0AZM1_HUMAN"]},{"UniProt":"Q53F30","RefSeq":[["NM_001286035","NP_001272964"…		Distribution: Detected in all; Specificity: Low tissue specificity	antibody: Most normal cells showed weak to moderate nuclear positivity with additional cytoplasmic positivity.; Nuclear expression in most tissues.	Antibody: Most malignancies showed weak to moderate cytoplasmic positivity with additional nuclear positivity.
1	ATIC	471	AICAR|AICARFT|HEL-S-70p|IMPCHASE|PURH	This gene encodes a bifunctional protein that catalyzes the last two steps of the de novo purine biosynthetic pathway. The N-terminal domain has phosphoribosylaminoimidazolecarboxamide formyltransferase activity, and the C-terminal domain has IMP cyclohydrolase activity. A mutation in this gene results in AICA-ribosiduria. [provided by RefSeq, Sep 2009]	ATIC (5-Aminoimidazole-4-Carboxamide Ribonucleotide Formyltransferase/IMP Cyclohydrolase) is a Protein Coding gene. Diseases associated with ATIC include Aicar Transformylase/Imp Cyclohydrolase Deficiency and Pediatric Osteosarcoma. Among its related pathways are One carbon pool by folate and Metabolism. Gene Ontology (GO) annotations related to this gene include protein homodimerization activity…	Bifunctional enzyme that catalyzes the last two steps of purine biosynthesis (PubMed:11948179, PubMed:14756554). Acts as a transformylase that incorporates a formyl group to the AMP analog AICAR (5-amino-1-(5-phospho-beta-D-ribosyl)imidazole-4-carboxamide) to produce the intermediate formyl-AICAR (FAICAR) (PubMed:9378707, PubMed:11948179, PubMed:10985775). Can use both 10-formyldihydrofolate and …	33 50	41 67	38 83	37 71	5-aminoimidazole-4-carboxamide ribonucleotide formyltransferase/IMP cyclohydrolase	chr2:215311974-215359745	symbol	H. sapiens	protein-coding	This gene encodes a bifunctional protein that catalyzes the last two steps of the de novo purine biosynthetic pathway. The N-terminal domain has phosphoribosylaminoimidazolecarboxamide formyltransferase activity, and the C-terminal domain has IMP cyclohydrolase activity. A mutation in this gene results in AICA-ribosiduria. [provided by RefSeq, Sep 2009]	GO:0046452 dihydrofolate metabolic process;GO:0006189 'de novo' IMP biosynthetic process;GO:0003360 brainstem development	[GO:0008150] biological_process; [GO:0034641] cellular nitrogen compound metabolic process; [GO:0009058] biosynthetic process; [GO:0044281] small molecule metabolic process; [GO:0003674] molecular_function; [GO:0016810] hydrolase activity, acting on carbon-nitrogen (but not peptide) bonds; [GO:0005575] cellular_component; [GO:0005737] cytoplasm; [GO:0005622] intracellular; [GO:0005829] cytosol; […	GO:0070062 extracellular exosome;GO:1903561 extracellular vesicle;GO:0043230 extracellular organelle	GO:0003937 IMP cyclohydrolase activity;GO:0004643 phosphoribosylaminoimidazolecarboxamide formyltransferase activity;GO:0019238 cyclohydrolase activity		Predicted intracellular proteins; FDA approved drug targets:Small molecule drugs; Disease related genes; Cancer-related genes; ENZYME proteins:Hydrolases; Enzymes; ENZYME proteins:Transferases	[IPR002695] Bifunctional purine biosynthesis protein PurH-like; [IPR011607] Methylglyoxal synthase-like domain; [IPR016193] Cytidine deaminase-like; [IPR024050] AICAR transformylase, insert domain superfamily; [IPR024051] AICAR transformylase, duplicated domain superfamily; [IPR036914] Methylglyoxal synthase-like domain superfamily	Cytosol;Plasma membrane (reliability'])					yes				[ORPHA:250977] AICA-ribosiduria	OMIM ID:601731 5-aminoimidazole-4-carboxamide ribonucleotide formyltransferase/imp cyclohydrolase	AICAR transformylase/IMP cyclohydrolase deficiency	Body Height;Hypertriglyceridemia;Platelet Function Tests	Tomography Scanners, X-Ray Computed	[608688] AICA-RIBOSURIA	Aicar transformylase/imp cyclohydrolase deficiency: pathogenic; Methotrexate response - efficacy: drug response	HP:0000063:Fused labia minora; HP:0007875:Congenital blindness; HP:0000951:Abnormality of the skin; HP:0008665:Clitoral hypertrophy; HP:0002187:Intellectual disability, profound; HP:0000154:Wide mouth; HP:0011220:Prominent forehead; HP:0001939:Abnormality of metabolism/homeostasis; HP:0000248:Brachycephaly; HP:0000426:Prominent nasal bridge; HP:0000219:Thin upper lip vermilion; HP:0001631:Atrial …	Tetrahydrofolic acid; Methotrexate; Pemetrexed; AICA ribonucleotide; Guanosine-5'-Monophosphate; 5-monophosphate-9-beta-D-ribofuranosyl xanthine; Acid yellow 54 free acid; N-[4-([(2-Amino-4-oxo-1,4-dihydropyrido[3,2-d]pyrimidin-6-yl)methyl]{(2E)-3-[4-carbamoyl-1-(5-O-phosphono-beta-D-ribofuranosyl)-1H-imidazol-5-yl]-2-propenoyl}amino)benzoyl]-L-glutamic acid	AICAR Transformylase Inosine Monophosphate Cyclohydrolase Deficiency; Adenylosuccinate lyase deficiency (disorder); Amaurosis; Blindness, Acquired; Blindness, Hysterical; Blindness, Transient; Urinary Bladder Inflammatory Myofibroblastic Tumor; Blindness, Monocular; Fused labia minora; HERMANSKY-PUDLAK SYNDROME 5; Blindness both eyes NOS (disorder); Blindness, Legal; Congenital blindness; Hyperla…	36	78	[{"UniProt":"P31939","EnsemblGene":["ENSG00000138363"],"SwissProt":["PUR9_HUMAN"]},{"UniProt":"V9HWH7","RefSeq":[["NM_004044","NP_004035","REVIEWED"]],"UCSC":["uc002vex.5"],"SwissProt":["V9HWH7_HUMAN"]}]		Distribution: Detected in all; Specificity: Low tissue specificity	antibody: Most normal tissues displayed strong cytoplasmic staining except for cells in CNS which were weakly to moderately stained. ; Cytoplasmic expression at variable levels.	Antibody: Most malignant cells displayed moderate to strong cytoplasmic staining. Renal cancers were generally negative.
1	ATRX	546	JMS|MRX52|RAD54|RAD54L|XH2|XNP|ZNF-HX	The protein encoded by this gene contains an ATPase/helicase domain, and thus it belongs to the SWI/SNF family of chromatin remodeling proteins. This protein is found to undergo cell cycle-dependent phosphorylation, which regulates its nuclear matrix and chromatin association, and suggests its involvement in the gene regulation at interphase and chromosomal segregation in mitosis. Mutations in th…	ATRX (ATRX Chromatin Remodeler) is a Protein Coding gene. Diseases associated with ATRX include Mental Retardation-Hypotonic Facies Syndrome, X-Linked, 1 and Alpha-Thalassemia/Mental Retardation Syndrome, X-Linked. Among its related pathways are Chromatin Regulation / Acetylation and Pathways Affected in Adenoid Cystic Carcinoma. Gene Ontology (GO) annotations related to this gene include chromat…	Involved in transcriptional regulation and chromatin remodeling. Facilitates DNA replication in multiple cellular environments and is required for efficient replication of a subset of genomic loci. Binds to DNA tandem repeat sequences in both telomeres and euchromatin and in vitro binds DNA quadruplex structures. May help stabilizing G-rich regions into regular chromatin structures by remodeling …	21 44	22 35	19 35	14 22	ATRX chromatin remodeler	chrX:77786235-77504880	symbol	H. sapiens	protein-coding	The protein encoded by this gene contains an ATPase/helicase domain, and thus it belongs to the SWI/SNF family of chromatin remodeling proteins. This protein is found to undergo cell cycle-dependent phosphorylation, which regulates its nuclear matrix and chromatin association, and suggests its involvement in the gene regulation at interphase and chromosomal segregation in mitosis. Mutations in th…	GO:0035120 post-embryonic appendage morphogenesis;GO:0035127 post-embryonic limb morphogenesis;GO:0035128 post-embryonic forelimb morphogenesis	[GO:0003674] molecular_function; [GO:0043167] ion binding; [GO:0005575] cellular_component; [GO:0005622] intracellular; [GO:0043226] organelle; [GO:0005634] nucleus; [GO:0005654] nucleoplasm; [GO:0003677] DNA binding; [GO:0008150] biological_process; [GO:0051276] chromosome organization; [GO:0065003] protein-containing complex assembly; [GO:0022607] cellular component assembly; [GO:0005694] chrom…	GO:1990421 subtelomeric heterochromatin;GO:1990707 nuclear subtelomeric heterochromatin;GO:0031618 nuclear pericentric heterochromatin	GO:0015616 DNA translocase activity;GO:0070087 chromo shadow domain binding;GO:0008094 DNA-dependent ATPase activity		Predicted intracellular proteins; Disease related genes; Transcription factors:Zinc-coordinating DNA-binding domains; ENZYME proteins:Hydrolases; Cancer-related genes:Mutational cancer driver genes; Enzymes; Potential drug targets	[IPR000330] SNF2-related, N-terminal domain; [IPR001650] Helicase, C-terminal; [IPR011011] Zinc finger, FYVE/PHD-type; [IPR013083] Zinc finger, RING/FYVE/PHD-type; [IPR014001] Helicase superfamily 1/2, ATP-binding domain; [IPR025766] ADD domain; [IPR027417] P-loop containing nucleoside triphosphate hydrolase; [IPR038718] SNF2-like, N-terminal domain superfamily; [IPR041430] ATRX, ADD domain	Nuclear bodies (reliability'])						principal4		MP:0005385 cardiovascular system phenotype; MP:0010768 mortality/aging; MP:0005384 cellular phenotype; MP:0005378 growth/size/body region phenotype; MP:0005386 behavior/neurological phenotype; MP:0005389 reproductive system phenotype; MP:0003631 nervous system phenotype; MP:0005391 vision/eye phenotype; MP:0005380 embryo phenotype	[ORPHA:847] Alpha-thalassemia-X-linked intellectual disability syndrome; [ORPHA:231401] Alpha-thalassemia - myelodysplastic syndrome; [ORPHA:93973] Carpenter-Waziri syndrome; [ORPHA:93971] Chudley-Lowry-Hoar syndrome; [ORPHA:93970] Holmes-Gang syndrome; [ORPHA:93972] Juberg-Marsidi syndrome; [ORPHA:100075] Neuroendocrine tumor of stomach; [ORPHA:93974] Smith-Fineman-Myers syndrome	OMIM ID:300032 Atr-x gene	Alpha thalassemia-X-linked intellectual disability syndrome; Mental retardation-hypotonic facies syndrome X-linked, 1; Global developmental delay; Generalized hypotonia; Absent speech; Drooling; Short stature; Low-set, posteriorly rotated ears; Psychomotor deterioration; Microcephaly; Inborn genetic diseases; Metastatic pancreatic neuroendocrine tumours; Muscular hypotonia; Hypoplasia of the corp…			[301040] ALPHA-THALASSEMIA MENTAL RETARDATION SYNDROME X-LINKED NON-DELETION TYPE; [309580] MENTAL RETARDATION SYNDROMIC X-LINKED WITH HYPOTONIC FACIES SYNDROME TYPE 1	Atr-x syndrome: likely pathogenic,pathogenic; Acquired hemoglobin h disease: pathogenic; Adenocarcinoma of the colon: pathogenic; Alpha-thalassemia/mental retardation syndrome: pathogenic; Cryptorchidism: pathogenic; Clinvar: phenotype not specified: likely pathogenic,pathogenic; Ductal breast carcinoma: pathogenic; Global developmental delay: likely pathogenic; History of neurodevelopmental diso…	HP:0011095:Overjet; HP:0011310:Bridged palmar crease; HP:0010249:Enlarged epiphyses of the distal phalanges of the hand; HP:0030274:Accessory scrotum; HP:0012761:Absent mastoid; HP:0010518:Thyroglossal cyst; HP:0005326:Hypoplastic philtrum; HP:0000451:Triangular nasal tip; HP:0031566:Abnormal pulmonary valve cusp morphology; HP:0012427:Excessive femoral anteversion; HP:0012584:Bilateral renal hyp…		Absent mastoid; Accessory scrotum; Bridged palmar crease; Enlarged epiphyses of the distal phalanges of the hand; Hemoglobin H Constant Spring; Hydrops fetalis due to alpha thalassemia; MENTAL RETARDATION-HYPOTONIC FACIES SYNDROME, X-LINKED; Mental Retardation with Spastic Paraplegia; Mental retardation Smith Fineman Myers type; Triple gene defect alpha thalassemia; Abnormal pulmonary valve cusp …	164	260	[{"UniProt":"P46100","EnsemblGene":["ENSG00000085224"],"EnsemblTrans":[["ENST00000373344","ENSP00000362441","principal4"],["ENST00000395603","ENSP00000378967","alternative2"]],"RefSeq":[["NM_000489","NP_000480","REVIEWED"],["NM_138270","NP_612114","REVIEWED"]],"SwissProt":["ATRX_HUMAN"]},{"UniProt":"A4LAA3","RefSeq":[["NM_000489","NP_000480","REVIEWED"]],"SwissProt":["A4LAA3_HUMAN"]},{"UniProt":"…		Distribution: Detected in all; Specificity: Low tissue specificity	General nuclear expression.; antibody: Strong nuclear staining in respiratory epithelia, salivary and thyroid gland and urothelia. Moderate nuclear staining in most other tissues with some additional cytoplasmic staining in a few tissues. Strong cytoplasmic staining in a fraction of immune cells.	Antibody: Weak to moderate nuclear staining in several cases of most cancer tissues, often with a minor fraction of negative cells. Further more cytoplasmic staining in a few cancer tissues.
1	BCL10	8915	CARMEN|CIPER|CLAP|IMD37|c-E10|mE10	This gene was identified by its translocation in a case of mucosa-associated lymphoid tissue (MALT) lymphoma. The protein encoded by this gene contains a caspase recruitment domain (CARD), and has been shown to induce apoptosis and to activate NF-kappaB. This protein is reported to interact with other CARD domain containing proteins including CARD9, 10, 11 and 14, which are thought to function as…	BCL10 (BCL10 Immune Signaling Adaptor) is a Protein Coding gene. Diseases associated with BCL10 include Lymphoma, Mucosa-Associated Lymphoid Type and Immunodeficiency 37. Among its related pathways are B cell receptor signaling pathway (KEGG) and NF-KappaB Family Pathway. Gene Ontology (GO) annotations related to this gene include protein kinase binding and transcription factor binding.	Involved in adaptive immune response (PubMed:25365219). Promotes apoptosis, pro-caspase-9 maturation and activation of NF-kappa-B via NIK and IKK. May be an adapter protein between upstream TNFR1-TRADD-RIP complex and the downstream NIK-IKK-IKAP complex. Is a substrate for MALT1 (PubMed:18264101). BCL10_HUMAN,O95999	14 16	10 14	18 30	16 18	BCL10 immune signaling adaptor	chr1:85276632-85265776	symbol	H. sapiens	protein-coding	This gene was identified by its translocation in a case of mucosa-associated lymphoid tissue (MALT) lymphoma. The protein encoded by this gene contains a caspase recruitment domain (CARD), and has been shown to induce apoptosis and to activate NF-kappaB. This protein is reported to interact with other CARD domain containing proteins including CARD9, 10, 11 and 14, which are thought to function as…	GO:0032641 lymphotoxin A production;GO:0042109 lymphotoxin A biosynthetic process;GO:0032765 positive regulation of mast cell cytokine production	[GO:0008150] biological_process; [GO:0008219] cell death; [GO:0034641] cellular nitrogen compound metabolic process; [GO:0009058] biosynthetic process; [GO:0005575] cellular_component; [GO:0005622] intracellular; [GO:0043226] organelle; [GO:0005634] nucleus; [GO:0005737] cytoplasm; [GO:0005829] cytosol; [GO:0003674] molecular_function; [GO:0005773] vacuole; [GO:0005764] lysosome; [GO:0002376] imm…	GO:0002096 polkadots;GO:0032449 CBM complex;GO:0001772 immunological synapse	GO:0043422 protein kinase B binding;GO:0050700 CARD domain binding;GO:0051059 NF-kappaB binding		Predicted intracellular proteins; Disease related genes; Cancer-related genes	[IPR001315] CARD domain; [IPR011029] Death-like domain superfamily; [IPR033238] B-cell lymphoma/leukemia 10/E10; [IPR042143] BCL10, CARD domain	Nucleoplasm (reliability'])						principal1		MP:0010768 mortality/aging; MP:0005384 cellular phenotype; MP:0005387 immune system phenotype; MP:0003631 nervous system phenotype; MP:0005397 hematopoietic system phenotype; MP:0005379 endocrine/exocrine gland phenotype; MP:0005380 embryo phenotype	[ORPHA:52417] MALT lymphoma	OMIM ID:603517 B-cell cll/lymphoma 10	Malignant tumor of testis; Male germ cell tumor, somatic; Mesothelioma; Sezary syndrome; Carcinoma of colon; T-cell acute lymphoblastic leukemia; Follicular lymphoma; Mucosa-associated lymphoma	Anthropometry;Electrocardiography;Myocardial Infarction	Alzheimer Disease;Multiple Sclerosis;Neurodegenerative Diseases		Carcinoma of colon: pathogenic; Follicular lymphoma: pathogenic; Immunodeficiency 37: pathogenic; Male germ cell tumor, somatic: pathogenic; Malignant tumor of testis: pathogenic; Mesothelioma: pathogenic; Mucosa-associated lymphoma: pathogenic; Sezary syndrome: pathogenic; T-cell acute lymphoblastic leukemia: pathogenic	HP:0045038:Gastric lymphoma; HP:0100001:Malignant mesothelioma; HP:0009792:Teratoma; HP:0100768:Choriocarcinoma; HP:0012123:Posterior uveitis; HP:0012191:B-cell lymphoma; HP:0030731:Carcinoma; HP:0100721:Mediastinal lymphadenopathy; HP:0000820:Abnormality of the thyroid gland; HP:0000614:Abnormal nasolacrimal system morphology; HP:0000133:Gonadal dysgenesis; HP:0002383:Encephalitis; HP:0002113:Pu…		Atypical lymphoproliferative disorder; IMMUNODEFICIENCY 37; MALE GERM CELL TUMOR, SOMATIC; Primary adenocarcinoma of colon; Male Germ Cell Tumor; Gastric Diffuse Large B-Cell Lymphoma; Ocular Adnexal Lymphoma; Primary cutaneous marginal zone B-cell lymphoma; Acinar cell carcinoma of pancreas; Atypical Lobular Breast Hyperplasia; Myelokathexis; Ocular Adnexal Mucosa-Associated Lymphoid Tissue Lymp…	91	181	[{"UniProt":"O95999","EnsemblGene":["ENSG00000142867"],"EnsemblTrans":[["ENST00000648566","ENSP00000498104","principal1"]],"RefSeq":[["NM_003921","NP_003912","REVIEWED"]],"UCSC":["uc021opd.3"],"SwissProt":["BCL10_HUMAN"]},{"UniProt":"A0A087WWW9","EnsemblGene":["ENSG00000142867"],"EnsemblTrans":[["ENST00000620248","ENSP00000480561",""]],"RefSeq":[["NM_001320715","NP_001307644","REVIEWED"]],"UCSC":…		Distribution: Detected in all; Specificity: Low tissue specificity	Cytoplasmic expression in most cell types.; antibody: A majority of normal tissues displayed weak to moderate cytoplasmic immunoreactivity. Cells of the CNS and muscle tissues were in general negative.	Antibody: Most malignant tissues displayed weak to moderate cytoplasmic immunoreactivity. Strong staining was observed in malignant lymphomas and a few stomach- and lung cancers.
1	BRAF	673	B-RAF1|B-raf|BRAF1|NS7|RAFB1	This gene encodes a protein belonging to the RAF family of serine/threonine protein kinases. This protein plays a role in regulating the MAP kinase/ERK signaling pathway, which affects cell division, differentiation, and secretion. Mutations in this gene, most commonly the V600E mutation, are the most frequently identified cancer-causing mutations in melanoma, and have been identified in various …	BRAF (B-Raf Proto-Oncogene, Serine/Threonine Kinase) is a Protein Coding gene. Diseases associated with BRAF include Cardiofaciocutaneous Syndrome 1 and Lung Cancer. Among its related pathways are Common Cytokine Receptor Gamma-Chain Family Signaling Pathways and Negative regulation of MAPK pathway. Gene Ontology (GO) annotations related to this gene include calcium ion binding and transferase ac…	Protein kinase involved in the transduction of mitogenic signals from the cell membrane to the nucleus (Probable). Phosphorylates MAP2K1, and thereby activates the MAP kinase signal transduction pathway (PubMed:21441910, PubMed:29433126). May play a role in the postsynaptic responses of hippocampal neurons (PubMed:1508179). BRAF_HUMAN,P15056	15 23	15 24	13 22	11 14	B-Raf proto-oncogene, serine/threonine kinase	chr7:140924929-140713328	symbol	H. sapiens	protein-coding	This gene encodes a protein belonging to the RAF family of serine/threonine protein kinases. This protein plays a role in regulating the MAP kinase/ERK signaling pathway, which affects cell division, differentiation, and secretion. Mutations in this gene, most commonly the V600E mutation, are the most frequently identified cancer-causing mutations in melanoma, and have been identified in various …	GO:0070413 trehalose metabolism in response to stress;GO:0005991 trehalose metabolic process;GO:0005984 disaccharide metabolic process	[GO:0003674] molecular_function; [GO:0043167] ion binding; [GO:0007165] signal transduction; [GO:0008150] biological_process; [GO:0006464] cellular protein modification process; [GO:0016301] kinase activity; [GO:0005575] cellular_component; [GO:0005622] intracellular; [GO:0043226] organelle; [GO:0005737] cytoplasm; [GO:0005829] cytosol; [GO:0019899] enzyme binding; [GO:0030154] cell differentiati…	GO:0005829 cytosol;GO:0005886 plasma membrane;GO:0071944 cell periphery	GO:0097110 scaffold protein binding;GO:0031267 small GTPase binding;GO:0004674 protein serine/threonine kinase activity	TKL Ser/Thr protein kinase family	Predicted intracellular proteins; FDA approved drug targets:Small molecule drugs; Disease related genes; Cancer-related genes:Mutational cancer driver genes; Enzymes; Kinases:TKL Ser/Thr protein kinases; ENZYME proteins:Transferases; Cancer-related genes:Mutated cancer genes	[IPR000719] Protein kinase domain; [IPR001245] Serine-threonine/tyrosine-protein kinase, catalytic domain; [IPR002219] Protein kinase C-like, phorbol ester/diacylglycerol-binding domain; [IPR003116] Raf-like Ras-binding; [IPR008271] Serine/threonine-protein kinase, active site; [IPR011009] Protein kinase-like domain superfamily; [IPR017441] Protein kinase, ATP binding site; [IPR020454] Diacylglyc…	Vesicles (reliability']); Additional: Cytosol						principal3		MP:0005367 renal/urinary system phenotype; MP:0005370 liver/biliary system phenotype; MP:0005385 cardiovascular system phenotype; MP:0010768 mortality/aging; MP:0005369 muscle phenotype; MP:0005376 homeostasis/metabolism phenotype; MP:0005384 cellular phenotype; MP:0005378 growth/size/body region phenotype; MP:0005386 behavior/neurological phenotype; MP:0005381 digestive/alimentary phenotype; MP:…	[ORPHA:1340] CARDIOFACIOCUTANEOUS SYNDROME; [ORPHA:58017] Classic hairy cell leukemia; [ORPHA:54595] Craniopharyngioma; [ORPHA:146] Differentiated thyroid carcinoma; [ORPHA:389] Langerhans cell histiocytosis; [ORPHA:648] Noonan Syndrome; [ORPHA:500] Noonan syndrome with multiple lentigines; [ORPHA:251615] Pilomyxoid astrocytoma; [ORPHA:357194] Selection of therapeutic option in colorectal cancer;…	OMIM ID:164757 B-raf protooncogene, serine/threonine kinase	Lip and oral cavity carcinoma; Rasopathy; Cardiofaciocutaneous syndrome 1; Cerebral arteriovenous malformation; Noonan syndrome 7; Cardio-facio-cutaneous syndrome; Inborn genetic diseases; Global developmental delay; Malignant melanoma of skin; Ovarian Serous Cystadenocarcinoma; Neoplasm of the large intestine; Lung adenocarcinoma; Papillary renal cell carcinoma, sporadic; Multiple myeloma; Gliob…	Body Height;Frontal Lobe	Cerebrospinal Fluid;Influenza A Virus, H1N1 Subtype;Vitamins;amyloid beta-protein (1-42);tau Proteins	[115150] CARDIOFACIOCUTANEOUS SYNDROME; [613707] LEOPARD SYNDROME TYPE 3; [613706] NOONAN SYNDROME TYPE 7	Adenocarcinoma of prostate: likely pathogenic,pathogenic,uncertain significance; Adenocarcinoma of stomach: likely pathogenic,pathogenic; Adrenocortical carcinoma: likely pathogenic,pathogenic; Astrocytoma, low-grade, somatic: likely pathogenic,pathogenic; Brainstem glioma: likely pathogenic,pathogenic; Cardiofaciocutaneous syndrome 1: likely pathogenic,pathogenic,uncertain significance; Carcinom…	HP:0012059:Lentigo maligna melanoma; HP:0000306:Abnormality of the chin; HP:0002031:Abnormal esophagus morphology; HP:0030939:Palpebral thickening; HP:0006114:Multiple palmar creases; HP:0009908:Anterior creases of earlobe; HP:0008113:Multiple plantar creases; HP:0430000:Abnormality of the frontal bone; HP:0010939:Abnormality of the nasal bone; HP:0012286:Abnormal hypothalamus morphology; HP:0009…	Sorafenib; XL281; RAF-265; PLX-4720; N-{2,4-difluoro-3-[(5-pyridin-3-yl-1H-pyrrolo[2,3-b]pyridin-3-yl)carbonyl]phenyl}ethanesulfonamide; (1E)-5-(1-piperidin-4-yl-3-pyridin-4-yl-1H-pyrazol-4-yl)-2,3-dihydro-1H-inden-1-one oxime; Vemurafenib; Regorafenib; Dabrafenib; Encorafenib; Fostamatinib; Ripretinib	ASTROCYTOMA, LOW-GRADE, SOMATIC; Childhood Brain Stem Glioma; Congenital strabismus; Conjunctival Neoplasms; Desmoplastic spindle and epithelioid cell melanocytic nevus of skin; Diffuse melanocytosis; Drug-induced panniculitis; Eosinophilic cystitis; Eruptive melanocytic nevi; Glomus Tumor of Uncertain Malignant Potential; Glomus tumor, malignant; Granulomatous dermatitis; LEOPARD SYNDROME 3; Lym…	2147	2266	[{"UniProt":"P15056","EnsemblGene":["ENSG00000157764"],"EnsemblTrans":[["ENST00000646891","ENSP00000493543","principal3"]],"RefSeq":[["NM_004333","NP_004324","REVIEWED"]],"UCSC":["uc003vwc.5"],"SwissProt":["BRAF_HUMAN"]}]		Distribution: Detected in all; Specificity: Low tissue specificity	antibody: A majority of normal tissues displayed moderate cytoplasmic immunoreactivity. Microvilli in placental trophoblasts were distinctly stained. ; Ubiquitous cytoplasmic expression.	Antibody: Most malignant tissues showed moderate cytoplasmic staining. Strong immunoreactivity was observed in few cases of prostate-, breast- and thyroid cancer.
1	CANT1	124583	DBQD|DBQD1|EDM7|SCAN-1|SCAN1|SHAPY	This protein encoded by this gene belongs to the apyrase family. It functions as a calcium-dependent nucleotidase with a preference for UDP. Mutations in this gene are associated with Desbuquois dysplasia with hand anomalies. Alternatively spliced transcript variants have been noted for this gene.[provided by RefSeq, Mar 2010]	CANT1 (Calcium Activated Nucleotidase 1) is a Protein Coding gene. Diseases associated with CANT1 include Desbuquois Dysplasia 1 and Epiphyseal Dysplasia, Multiple, 7. Among its related pathways are Innate Immune System and Metabolism. Gene Ontology (GO) annotations related to this gene include calcium ion binding and pyrophosphatase activity.	Calcium-dependent nucleotidase with a preference for UDP. The order of activity with different substrates is UDP > GDP > UTP > GTP. Has very low activity towards ADP and even lower activity towards ATP. Does not hydrolyze AMP and GMP (PubMed:12234496, PubMed:15248776, PubMed:15006348, PubMed:16835225). Involved in proteoglycan synthesis (PubMed:22539336). CANT1_HUMAN,Q8WVQ1	26 24	21 22	29 31	25 21	calcium activated nucleotidase 1	chr17:79009793-78991716	symbol	H. sapiens	protein-coding	This protein encoded by this gene belongs to the apyrase family. It functions as a calcium-dependent nucleotidase with a preference for UDP. Mutations in this gene are associated with Desbuquois dysplasia with hand anomalies. Alternatively spliced transcript variants have been noted for this gene.[provided by RefSeq, Mar 2010]	GO:0030166 proteoglycan biosynthetic process;GO:0006029 proteoglycan metabolic process;GO:0043123 positive regulation of I-kappaB kinase/NF-kappaB signaling	[GO:0003674] molecular_function; [GO:0043167] ion binding; [GO:0005575] cellular_component; [GO:0005737] cytoplasm; [GO:0005622] intracellular; [GO:0043226] organelle; [GO:0005783] endoplasmic reticulum; [GO:0005886] plasma membrane; [GO:0005794] Golgi apparatus; [GO:0005576] extracellular region; [GO:0005615] extracellular space; [GO:0008150] biological_process; [GO:0006810] transport; [GO:00023…	GO:1904724 tertiary granule lumen;GO:0035580 specific granule lumen;GO:0032580 Golgi cisterna membrane	GO:0004382 guanosine-diphosphatase activity;GO:0043262 adenosine-diphosphatase activity;GO:0045134 uridine-diphosphatase activity		Predicted intracellular proteins; Disease related genes; Cancer-related genes; ENZYME proteins:Hydrolases; Enzymes; Potential drug targets	[IPR009283] Apyrase; [IPR036258] Apyrase superfamily				yes	yes			yes	MP:0005385 cardiovascular system phenotype; MP:0010768 mortality/aging; MP:0003631 nervous system phenotype; MP:0005391 vision/eye phenotype	[ORPHA:1425] Desbuquois syndrome	OMIM ID:613165 Calcium-activated nucleotidase 1	Desbuquois dysplasia 1; EPIPHYSEAL DYSPLASIA, MULTIPLE, 7; Inborn genetic diseases		Magnesium	[251450] DESBUQUOIS DYSPLASIA 1	Clinvar: phenotype not specified: likely pathogenic,pathogenic; Desbuquois dysplasia 1: likely pathogenic,pathogenic; Epiphyseal dysplasia, multiple, 7: likely pathogenic,pathogenic; Inborn genetic diseases: pathogenic	HP:0010097:Partial duplication of the distal phalanx of the hallux; HP:0005067:Proximal fibular overgrowth; HP:0006439:Radioulnar dislocation; HP:0008082:Medial deviation of the foot; HP:0006243:Phalangeal dislocation; HP:0010068:Broad first metatarsal; HP:0009611:Bifid distal phalanx of the thumb; HP:0008108:Advanced tarsal ossification; HP:0004233:Advanced ossification of carpal bones; HP:00064…	Phosphomethylphosphonic acid guanosyl ester	DESBUQUOIS DYSPLASIA 1; EPIPHYSEAL DYSPLASIA, MULTIPLE, 7; Medial deviation of the foot; Pain of skin; Partial duplication of the distal phalanx of the hallux; Phalangeal dislocation; Proximal fibular overgrowth; Radioulnar dislocation; CHONDRODYSPLASIA WITH JOINT DISLOCATIONS, GPAPP TYPE; Spinocerebellar ataxia with axonal neuropathy type 1; Bifid distal phalanx of the thumb; Catel Manzke syndro…	16	42	[{"UniProt":"Q8WVQ1","EnsemblGene":["ENSG00000171302"],"SwissProt":["CANT1_HUMAN"]},{"UniProt":"A0A024R8U8","RefSeq":[["NM_001159772","NP_001153244","REVIEWED"],["NM_001159773","NP_001153245","REVIEWED"],["NM_138793","NP_620148","REVIEWED"],["XM_005257021","XP_005257078","MODEL"],["XM_005257022","XP_005257079","MODEL"],["XM_006721683","XP_006721746","MODEL"],["XM_011524291","XP_011522593","MODEL"…		Distribution: Detected in all; Specificity: Low tissue specificity	General cytoplasmic expression, predominantly in glandular cells.; antibody: Most normal tissues showed moderate to strong cytoplasmic staining, often with a granular patter. Renal glomeruli and glial cells in CNS were negative.	Antibody: Moderate to strong cytoplasmic staining was observed in most malignancies. Skin and a majority of renal cancers were negative.
1	CCDC6	8030	D10S170|H4|PTC|TPC|TST1	This gene encodes a coiled-coil domain-containing protein. The encoded protein is ubiquitously expressed and may function as a tumor suppressor. A chromosomal rearrangement resulting in the expression of a fusion gene containing a portion of this gene and the intracellular kinase-encoding domain of the ret proto-oncogene is the cause of thyroid papillary carcinoma.[provided by RefSeq, Sep 2010]	CCDC6 (Coiled-Coil Domain Containing 6) is a Protein Coding gene. Diseases associated with CCDC6 include Differentiated Thyroid Carcinoma and Papillary Carcinoma. Among its related pathways are Endometrial cancer and Retinoblastoma (RB) in Cancer. Gene Ontology (GO) annotations related to this gene include SH3 domain binding and structural constituent of cytoskeleton.		23 31	29 30	29 38	19 22	coiled-coil domain containing 6	chr10:59906556-59788747	symbol	H. sapiens	protein-coding	This gene encodes a coiled-coil domain-containing protein. The encoded protein is ubiquitously expressed and may function as a tumor suppressor. A chromosomal rearrangement resulting in the expression of a fusion gene containing a portion of this gene and the intracellular kinase-encoding domain of the ret proto-oncogene is the cause of thyroid papillary carcinoma.[provided by RefSeq, Sep 2010]	GO:0007010 cytoskeleton organization;GO:0006996 organelle organization;GO:0016043 cellular component organization	[GO:0005575] cellular_component; [GO:0005737] cytoplasm; [GO:0005622] intracellular; [GO:0005829] cytosol; [GO:0043226] organelle; [GO:0005856] cytoskeleton; [GO:0003674] molecular_function; [GO:0008150] biological_process; [GO:0007010] cytoskeleton organization; [GO:0005198] structural molecule activity	GO:0005856 cytoskeleton;GO:0005829 cytosol;GO:0043232 intracellular non-membrane-bounded organelle	GO:0005200 structural constituent of cytoskeleton;GO:0017124 SH3 domain binding;GO:0019904 protein domain specific binding		Disease related genes; Predicted intracellular proteins; Cancer-related genes:Mutated cancer genes	[IPR019152] Protein of unknown function DUF2046	Cytosol (reliability'])						principal1		MP:0010768 mortality/aging	[ORPHA:146] Differentiated thyroid carcinoma	OMIM ID:601985 Coiled-coil domain-containing protein 6		Alcohol Drinking;Arteries;Child Development Disorders, Pervasive;Cholesterol, HDL;Platelet Function Tests	3-hydroxy-1-methylpropylmercapturic acid;S-(3-hydroxypropyl)cysteine N-acetate;Smoking					Nodular thyroid disease; Thyroid Hurthle Cell Carcinoma; Metastatic Lung Carcinoma; Neoplasms, Radiation-Induced; Thyroid Gland Oncocytic Adenoma; Thyroid Gland Noninvasive Follicular Neoplasm with Papillary-Like Nuclear Features; Tinea Capitis; Intratubular malignant germ cells; Papillary neoplasm; Mandibuloacral dysostosis; familial non-medullary thyroid cancer; Adenomatous goiter; Paraneoplast…	25	75	[{"UniProt":"Q16204","EnsemblGene":["ENSG00000108091"],"EnsemblTrans":[["ENST00000263102","ENSP00000263102","principal1"]],"RefSeq":[["NM_005436","NP_005427","REVIEWED"]],"UCSC":["uc001jks.5"],"SwissProt":["CCDC6_HUMAN"]},{"UniProt":"Q05CP8","RefSeq":[["NM_005436","NP_005427","REVIEWED"]],"SwissProt":["Q05CP8_HUMAN"]}]		Distribution: Detected in all; Specificity: Low tissue specificity	antibody: Most normal tissues were negative. Glandular cells in fallopian tubes, urothelium and gallbladder as well as neuronal cells showed moderate cytoplasmic and/or nuclear immunoreactivity.; Mainly cytoplasmic expression in several tissue types, most abundant in fallopian tube.	Antibody: Several endometrial and pancreatic cancers showed moderate cytoplasmic and/or nuclear positivity. Remaining cancer tissues were generally negative.
1	CCND1	595	BCL1|D11S287E|PRAD1|U21B31	The protein encoded by this gene belongs to the highly conserved cyclin family, whose members are characterized by a dramatic periodicity in protein abundance throughout the cell cycle. Cyclins function as regulators of CDK kinases. Different cyclins exhibit distinct expression and degradation patterns which contribute to the temporal coordination of each mitotic event. This cyclin forms a comple…	CCND1 (Cyclin D1) is a Protein Coding gene. Diseases associated with CCND1 include Von Hippel-Lindau Syndrome and Myeloma, Multiple. Among its related pathways are Regulation of Wnt-mediated beta catenin signaling and target gene transcription and Endometrial cancer. Gene Ontology (GO) annotations related to this gene include protein kinase activity and enzyme binding. An important paralog of thi…	Regulatory component of the cyclin D1-CDK4 (DC) complex that phosphorylates and inhibits members of the retinoblastoma (RB) protein family including RB1 and regulates the cell-cycle during G(1)/S transition. Phosphorylation of RB1 allows dissociation of the transcription factor E2F from the RB/E2F complex and the subsequent transcription of E2F target genes which are responsible for the progressi…	33 60	7 13	28 36	32 75	cyclin D1	chr11:69641156-69654474	symbol	H. sapiens	protein-coding	The protein encoded by this gene belongs to the highly conserved cyclin family, whose members are characterized by a dramatic periodicity in protein abundance throughout the cell cycle. Cyclins function as regulators of CDK kinases. Different cyclins exhibit distinct expression and degradation patterns which contribute to the temporal coordination of each mitotic event. This cyclin forms a comple…	GO:0000320 re-entry into mitotic cell cycle;GO:0070141 response to UV-A;GO:0033601 positive regulation of mammary gland epithelial cell proliferation	[GO:0005575] cellular_component; [GO:0008150] biological_process; [GO:0006464] cellular protein modification process; [GO:0005622] intracellular; [GO:0043226] organelle; [GO:0005634] nucleus; [GO:0005737] cytoplasm; [GO:0007049] cell cycle; [GO:0005654] nucleoplasm; [GO:0051301] cell division; [GO:0006950] response to stress; [GO:0005635] nuclear envelope; [GO:0003674] molecular_function; [GO:003…	GO:0000307 cyclin-dependent protein kinase holoenzyme complex;GO:0017053 transcriptional repressor complex;GO:1902554 serine/threonine protein kinase complex	GO:0070064 proline-rich region binding;GO:0016538 cyclin-dependent protein serine/threonine kinase regulator activity;GO:0042826 histone deacetylase binding		Predicted intracellular proteins; FDA approved drug targets:Small molecule drugs; Disease related genes; Cancer-related genes:Candidate cancer biomarkers; Cancer-related genes:Mutational cancer driver genes; Cancer-related genes:Mutated cancer genes	[IPR004367] Cyclin, C-terminal domain; [IPR006671] Cyclin, N-terminal; [IPR013763] Cyclin-like; [IPR015451] Cyclin D; [IPR036915] Cyclin-like superfamily; [IPR039361] Cyclin	Nucleoplasm (reliability'])						principal1		MP:0005370 liver/biliary system phenotype; MP:0005385 cardiovascular system phenotype; MP:0010768 mortality/aging; MP:0005369 muscle phenotype; MP:0005384 cellular phenotype; MP:0005378 growth/size/body region phenotype; MP:0005386 behavior/neurological phenotype; MP:0005381 digestive/alimentary phenotype; MP:0002006 neoplasm; MP:0005389 reproductive system phenotype; MP:0005391 vision/eye phenot…	[ORPHA:67038] B-cell chronic lymphocytic leukemia; [ORPHA:52416] MANTLE CELL LYMPHOMA; [ORPHA:29073] Multiple myeloma	OMIM ID:168461 Cyclin d1		Monocytes;Platelet Function Tests;Triiodothyronine	Body Height;Body Mass Index;Breast;Breast Neoplasms;Carcinoma, Renal Cell;Hip;Melanoma;Multiple Myeloma;Primary amyloidosis		Colorectal cancer, susceptibility to: risk factor; Immunoglobulin light chain (al) amyloidosis: risk factor; Immunoglobulin light chain (al) amyloidosis (heart involvement): risk factor; Immunoglobulin light chain (al) amyloidosis (kidney involvement): risk factor; Immunoglobulin light chain (al) amyloidosis (serum ig lambda profile): risk factor; Immunoglobulin light chain (al) amyloidosis (seru…	HP:0004341:Abnormality of vitamin B12 metabolism; HP:0002152:Hyperproteinemia; HP:0006880:Cerebellar hemangioblastoma; HP:0031047:Paraproteinemia; HP:0009713:Spinal hemangioblastoma; HP:0005954:Pulmonary capillary hemangiomatosis; HP:0006775:Multiple myeloma; HP:0030424:Epididymal cyst; HP:0009715:Papillary cystadenoma of the epididymis; HP:0011034:Amyloidosis; HP:0000014:Abnormality of the bladd…	Acetylsalicylic acid; Arsenic trioxide; Encorafenib; Bryostatin 1	Abnormality of vitamin B12 metabolism; Atypical follicular adenoma; Centrocytic (mantle cell) lymphoma (Kiel classification); Gastric Precancerous Condition; Head and Neck Basaloid Carcinoma; Low Grade Ductal Breast Carcinoma In Situ; Lymphoplasmacytoid immunocytoma; MULTIPLE MYELOMA, t(11;14) TYPE, SUSCEPTIBILITY TO; Synchronous Bilateral Breast Carcinoma; VON HIPPEL-LINDAU SYNDROME, MODIFIER OF…	1339	1557	[{"UniProt":"P24385","EnsemblGene":["ENSG00000110092"],"EnsemblTrans":[["ENST00000227507","ENSP00000227507","principal1"]],"RefSeq":[["NM_053056","NP_444284","REVIEWED"]],"SwissProt":["CCND1_HUMAN"]},{"UniProt":"Q6FI00","RefSeq":[["NM_053056","NP_444284","REVIEWED"]],"UCSC":["uc001opa.4"],"SwissProt":["Q6FI00_HUMAN"]}]		Distribution: Detected in many; Specificity: Low tissue specificity	Cytoplasmic and nuclear expression in several tissues.; antibody: Strong cytoplasmic staining was observed in hepatocytes. A subset of basal cells of squamous epithelium showed moderate to strong nuclear staining. Remaining normal tissues were weakly stained or negative.	Antibody: Few cases of melanoma, liver, renal, urothelial and prostate cancers showed moderate to strong immunoreactivity. Remaining cancer tissues were weakly stained or negative.
1	CDH1	999	Arc-1|BCDS1|CD324|CDHE|ECAD|LCAM|UVO	This gene encodes a classical cadherin of the cadherin superfamily. Alternative splicing results in multiple transcript variants, at least one of which encodes a preproprotein that is proteolytically processed to generate the mature glycoprotein. This calcium-dependent cell-cell adhesion protein is comprised of five extracellular cadherin repeats, a transmembrane region and a highly conserved cyt…	CDH1 (Cadherin 1) is a Protein Coding gene. Diseases associated with CDH1 include Blepharocheilodontic Syndrome 1 and Gastric Cancer, Hereditary Diffuse. Among its related pathways are Regulation of Wnt-mediated beta catenin signaling and target gene transcription and Preimplantation Embryo. Gene Ontology (GO) annotations related to this gene include calcium ion binding and protein phosphatase bi…	Cadherins are calcium-dependent cell adhesion proteins (PubMed:11976333). They preferentially interact with themselves in a homophilic manner in connecting cells; cadherins may thus contribute to the sorting of heterogeneous cell types. CDH1 is involved in mechanisms regulating cell-cell adhesions, mobility and proliferation of epithelial cells (PubMed:11976333). Has a potent invasive suppressor …	2	2	35 55	37 45	cadherin 1	chr16:68737292-68835537	symbol	H. sapiens	protein-coding	This gene encodes a classical cadherin of the cadherin superfamily. Alternative splicing results in multiple transcript variants, at least one of which encodes a preproprotein that is proteolytically processed to generate the mature glycoprotein. This calcium-dependent cell-cell adhesion protein is comprised of five extracellular cadherin repeats, a transmembrane region and a highly conserved cyt…	GO:0099576 regulation of protein catabolic process at postsynapse, modulating synaptic transmission;GO:0071680 response to indole-3-methanol;GO:0071681 cellular response to indole-3-methanol	[GO:0005886] plasma membrane; [GO:0005575] cellular_component; [GO:0003674] molecular_function; [GO:0043167] ion binding; [GO:0008150] biological_process; [GO:0007155] cell adhesion; [GO:0040011] locomotion; [GO:0048870] cell motility; [GO:0005737] cytoplasm; [GO:0005622] intracellular; [GO:0034641] cellular nitrogen compound metabolic process; [GO:0009058] biosynthetic process; [GO:0043226] orga…	GO:0016600 flotillin complex;GO:0016342 catenin complex;GO:0016328 lateral plasma membrane	GO:0045295 gamma-catenin binding;GO:0032794 GTPase activating protein binding;GO:0030506 ankyrin binding		CD markers; Predicted intracellular proteins; Disease related genes; Cancer-related genes:Candidate cancer biomarkers; Cancer-related genes:Mutational cancer driver genes; Cancer-related genes:Mutated cancer genes	[IPR000233] Cadherin, cytoplasmic domain; [IPR002126] Cadherin-like; [IPR014868] Cadherin prodomain; [IPR015919] Cadherin-like superfamily; [IPR020894] Cadherin conserved site; [IPR027397] Catenin binding domain superfamily; [IPR039808] Cadherin	Cell Junctions;Plasma membrane (reliability']); Additional: Golgi apparatus			yes	yes	yes		yes	MP:0005385 cardiovascular system phenotype; MP:0010768 mortality/aging; MP:0005376 homeostasis/metabolism phenotype; MP:0005384 cellular phenotype; MP:0005381 digestive/alimentary phenotype; MP:0005387 immune system phenotype; MP:0005389 reproductive system phenotype; MP:0005379 endocrine/exocrine gland phenotype; MP:0010771 integument phenotype; MP:0005380 embryo phenotype	[ORPHA:1997] Blepharo-cheilo-odontic syndrome; [ORPHA:199306] Cleft lip/palate; [ORPHA:26106] Hereditary diffuse gastric cancer	OMIM ID:192090 Cadherin 1	Hereditary diffuse gastric cancer; Familial cancer of breast; Hereditary cancer-predisposing syndrome; Cleft Lip with or without Cleft Palate; not specified; Blepharocheilodontic syndrome 1; Malignant tumor of prostate; Neoplasm of ovary; Endometrial carcinoma; Breast cancer, lobular		Alzheimer Disease;Colorectal Neoplasms;Melanoma;dimethylarginine	[No disease mim] Blepharo-cheiro-dontic syndrome		HP:0045005:Neural tube defect; HP:0007651:Ectropion of lower eyelids; HP:0002582:Chronic atrophic gastritis; HP:0002744:Bilateral cleft lip and palate; HP:0009743:Distichiasis; HP:0006774:Ovarian papillary adenocarcinoma; HP:0100621:Dysgerminoma; HP:0011044:Abnormal number of permanent teeth; HP:0006292:Abnormality of dental eruption; HP:0010294:Palate fistula; HP:0012905:Euryblepharon; HP:020004…		BLEPHAROCHEILODONTIC SYNDROME 1; Neoplasm Seeding; Blepharo-cheilo-dontic syndrome; Malignant neoplasm of larnyx stage IV; Metastatic gastric adenocarcinoma; Central Nervous System Germinoma; Eperythrozoonosis; Spongiotic dermatitis; Linitis Plastica; Lower eyelid ectropion; Non-Small Cell Adenocarcinoma; Paget's disease of vulva; Supraglottic Squamous Cell Carcinoma; Primary infertility; Ovarian…	1729	1934	[{"UniProt":"P12830","EnsemblGene":["ENSG00000039068"],"RefSeq":[["NM_001317185","NP_001304114","REVIEWED"],["NM_001317186","NP_001304115","REVIEWED"]],"SwissProt":["CADH1_HUMAN"]},{"UniProt":"A0A0U2ZQU7","RefSeq":[["NM_004360","NP_004351","REVIEWED"]],"SwissProt":["A0A0U2ZQU7_HUMAN"]},{"UniProt":"B3GN61","RefSeq":[["NM_001317184","NP_001304113","REVIEWED"],["NM_001317185","NP_001304114","REVIEWE…		Distribution: Detected in many; Specificity: Tissue enhanced	Cytoplasmic and membranous expression in epithelial cells.; antibody: Most normal tissues showed moderate to strong membrane positivity with additional cytoplasmic staining. CNS, lymphoid tissues, testis, muscle tissues and mesenchymal cells were negative.	Antibody: Most cancer tissues showed moderate to strong membrane positivity, additional cytoplasmic positivity in several cancers. Gliomas and lymphomas were negative.
1	CHEK2	11200	CDS1|CHK2|HuCds1|LFS2|PP1425|RAD53|hCds1	In response to DNA damage and replication blocks, cell cycle progression is halted through the control of critical cell cycle regulators. The protein encoded by this gene is a cell cycle checkpoint regulator and putative tumor suppressor. It contains a forkhead-associated protein interaction domain essential for activation in response to DNA damage and is rapidly phosphorylated in response to rep…	CHEK2 (Checkpoint Kinase 2) is a Protein Coding gene. Diseases associated with CHEK2 include Prostate Cancer and Li-Fraumeni Syndrome 2. Among its related pathways are ATM Pathway and Regulation of activated PAK-2p34 by proteasome mediated degradation. Gene Ontology (GO) annotations related to this gene include protein homodimerization activity and transferase activity, transferring phosphorus-co…	Serine/threonine-protein kinase which is required for checkpoint-mediated cell cycle arrest, activation of DNA repair and apoptosis in response to the presence of DNA double-strand breaks. May also negatively regulate cell cycle progression during unperturbed cell cycles. Following activation, phosphorylates numerous effectors preferentially at the consensus sequence [L-X-R-X-X-S/T]. Regulates ce…	10 10	6 7	12 23	11 10	checkpoint kinase 2	chr22:28741866-28687743	symbol	H. sapiens	protein-coding	In response to DNA damage and replication blocks, cell cycle progression is halted through the control of critical cell cycle regulators. The protein encoded by this gene is a cell cycle checkpoint regulator and putative tumor suppressor. It contains a forkhead-associated protein interaction domain essential for activation in response to DNA damage and is rapidly phosphorylated in response to rep…	GO:0072428 signal transduction involved in intra-S DNA damage checkpoint;GO:1903925 response to bisphenol A;GO:1903926 cellular response to bisphenol A	[GO:0003674] molecular_function; [GO:0043167] ion binding; [GO:0008150] biological_process; [GO:0006464] cellular protein modification process; [GO:0016301] kinase activity; [GO:0005575] cellular_component; [GO:0005622] intracellular; [GO:0043226] organelle; [GO:0005634] nucleus; [GO:0005737] cytoplasm; [GO:0005794] Golgi apparatus; [GO:0007049] cell cycle; [GO:0005654] nucleoplasm; [GO:0008219] …	GO:0016605 PML body;GO:0000781 chromosome, telomeric region;GO:0098687 chromosomal region	GO:0031625 ubiquitin protein ligase binding;GO:0044389 ubiquitin-like protein ligase binding;GO:0004674 protein serine/threonine kinase activity	CAMK Ser/Thr protein kinase family	Predicted intracellular proteins; Disease related genes; Cancer-related genes:Candidate cancer biomarkers; Cancer-related genes:Mutational cancer driver genes; Enzymes; Potential drug targets; ENZYME proteins:Transferases; Kinases:CAMK Ser/Thr protein kinases	[IPR000719] Protein kinase domain; [IPR008271] Serine/threonine-protein kinase, active site; [IPR011009] Protein kinase-like domain superfamily; [IPR000253] Forkhead-associated (FHA) domain; [IPR008984] SMAD/FHA domain superfamily; [IPR001245] Serine-threonine/tyrosine-protein kinase, catalytic domain	Nucleoplasm (reliability']); Additional: Golgi apparatus				yes	yes			MP:0010768 mortality/aging; MP:0005376 homeostasis/metabolism phenotype; MP:0005384 cellular phenotype; MP:0002006 neoplasm	[ORPHA:1331] Familial prostate cancer; [ORPHA:145] Hereditary breast and ovarian cancer syndrome; [ORPHA:524] Li-Fraumeni syndrome; [ORPHA:668] OSTEOSARCOMA	OMIM ID:604373 Checkpoint kinase 2	Familial cancer of breast; Hereditary cancer-predisposing syndrome; Hereditary breast and ovarian cancer syndrome; Neoplasm of the breast; NK-cell enteropathy; Sarcoma; Li-Fraumeni syndrome 2; Osteosarcoma; Malignant tumor of prostate; Nephroblastoma; Ovarian Neoplasms; Li-Fraumeni syndrome; Congenital heart defects, multiple types, 3; CHEK2-Related Cancer Susceptibility; not specified; Breast an…	Gastrointestinal Neoplasms	Carcinoma, Squamous Cell;Esophageal Neoplasms;Lung Neoplasms;Optic Disk		Astrocytoma: not provided,pathogenic,uncertain significance; Breast cancer, susceptibility to: likely pathogenic,not provided,pathogenic,risk factor,uncertain significance; Breast cancer: likely pathogenic,not provided,pathogenic,risk factor,uncertain significance; Breast and colorectal cancer, susceptibility to: likely pathogenic,not provided,pathogenic,risk factor,uncertain significance; Chek2-…	HP:0006491:Abnormality of the tibial metaphysis; HP:0009919:Retinoblastoma; HP:0009733:Glioma; HP:0006489:Abnormality of the femoral metaphysis; HP:0100641:Neoplasm of the adrenal cortex; HP:0002669:Osteosarcoma; HP:0002448:Progressive encephalopathy; HP:0100273:Neoplasm of the colon; HP:0030406:Primary peritoneal carcinoma; HP:0100242:Sarcoma; HP:0004375:Neoplasm of the nervous system; HP:001102…	XL844; Enzastaurin; Fostamatinib	B Lymphoblastic Leukemia/Lymphoma, Not Otherwise Specified; BREAST AND COLORECTAL CANCER, SUSCEPTIBILITY TO; CANCER OF MULTIPLE TYPES, SUSCEPTIBILITY TO; Li-Fraumeni Syndrome 2; Neurofibromatosis 1 and 2 (NF1 and NF2); Abnormality of the tibial metaphysis; COLORECTAL CANCER, SUSCEPTIBILITY TO; Refractory anemia with excess blasts I; Abnormality of the femoral metaphysis; Type 1 Papillary Renal Ce…	461	579	[{"UniProt":"O96017","EnsemblGene":["ENSG00000183765"],"SwissProt":["CHK2_HUMAN"]}]		Distribution: Detected in all; Specificity: Low tissue specificity	antibody: Most normal tissues showed moderate to strong nuclear positivity. Myocytes and most cells in CNS displayed weakly stained cells or were negative.; Nuclear expression in most tissues.	Antibody: Most cancer tissues showed moderate to strong nuclear staining. Several cases of renal cancers were weakly stained or negative.
1	CTNNB1	1499	CTNNB|EVR7|MRD19|NEDSDV|armadillo	The protein encoded by this gene is part of a complex of proteins that constitute adherens junctions (AJs). AJs are necessary for the creation and maintenance of epithelial cell layers by regulating cell growth and adhesion between cells. The encoded protein also anchors the actin cytoskeleton and may be responsible for transmitting the contact inhibition signal that causes cells to stop dividing…	CTNNB1 (Catenin Beta 1) is a Protein Coding gene. Diseases associated with CTNNB1 include Pilomatrixoma and Neurodevelopmental Disorder With Spastic Diplegia And Visual Defects. Among its related pathways are Association Between Physico-Chemical Features and Toxicity Associated Pathways and Regulation of Wnt-mediated beta catenin signaling and target gene transcription. Gene Ontology (GO) annotat…	Key downstream component of the canonical Wnt signaling pathway (PubMed:17524503, PubMed:18077326, PubMed:18086858, PubMed:18957423, PubMed:21262353, PubMed:22155184, PubMed:22647378, PubMed:22699938). In the absence of Wnt, forms a complex with AXIN1, AXIN2, APC, CSNK1A1 and GSK3B that promotes phosphorylation on N-terminal Ser and Thr residues and ubiquitination of CTNNB1 via BTRC and its subse…	56 77	43 58	53 92	45 62	catenin beta 1	chr3:41199422-41240445	symbol	H. sapiens	protein-coding	The protein encoded by this gene is part of a complex of proteins that constitute adherens junctions (AJs). AJs are necessary for the creation and maintenance of epithelial cell layers by regulating cell growth and adhesion between cells. The encoded protein also anchors the actin cytoskeleton and may be responsible for transmitting the contact inhibition signal that causes cells to stop dividing…	GO:0007403 glial cell fate determination;GO:0061324 canonical Wnt signaling pathway involved in positive regulation of cardiac outflow tract cell proliferation;GO:1904499 regulation of chromatin-mediated maintenance of transcription	[GO:0003674] molecular_function; [GO:0008150] biological_process; [GO:0007155] cell adhesion; [GO:0005575] cellular_component; [GO:0005737] cytoplasm; [GO:0005622] intracellular; [GO:0048856] anatomical structure development; [GO:0048646] anatomical structure formation involved in morphogenesis; [GO:0008219] cell death; [GO:0034641] cellular nitrogen compound metabolic process; [GO:0009058] biosy…	GO:0034750 Scrib-APC-beta-catenin complex;GO:0070369 beta-catenin-TCF7L2 complex;GO:0071664 catenin-TCF7L2 complex	GO:0045294 alpha-catenin binding;GO:0070411 I-SMAD binding;GO:0097718 disordered domain specific binding		Predicted intracellular proteins; Disease related genes; Cancer-related genes:Candidate cancer biomarkers; Cancer-related genes:Mutational cancer driver genes; Cancer-related genes:Mutated cancer genes	[IPR000225] Armadillo; [IPR011989] Armadillo-like helical; [IPR013284] Beta-catenin; [IPR016024] Armadillo-type fold	Plasma membrane (reliability'])					yes	principal2		MP:0005367 renal/urinary system phenotype; MP:0005370 liver/biliary system phenotype; MP:0005385 cardiovascular system phenotype; MP:0010768 mortality/aging; MP:0005369 muscle phenotype; MP:0005376 homeostasis/metabolism phenotype; MP:0005384 cellular phenotype; MP:0005378 growth/size/body region phenotype; MP:0005386 behavior/neurological phenotype; MP:0005381 digestive/alimentary phenotype; MP:…	[ORPHA:210159] Adult hepatocellular carcinoma; [ORPHA:54595] Craniopharyngioma; [ORPHA:873] Desmoid tumor; [ORPHA:891] Familial exudative vitreoretinopathy; [ORPHA:33402] Pediatric hepatocellular carcinoma; [ORPHA:91414] Pilomatrixoma; [ORPHA:404473] Severe intellectual disability-progressive spastic diplegia syndrome; [ORPHA:85142] NON RARE IN EUROPE: Aldosterone-producing adenoma	OMIM ID:116806 Catenin, beta-1	Mental retardation, autosomal dominant 19; Colorectal cancer; CTNNB1-related syndromic intellectual disability; Hepatocellular carcinoma; Intellectual disability; Absent speech; Teratoma; Microcephaly; Global developmental delay; Imperforate anus; Inborn genetic diseases; Adenocarcinoma of prostate; Malignant neoplasm of body of uterus; Adrenocortical carcinoma; Neoplasm of the large intestine; L…			[615075] MENTAL RETARDATION AUTOSOMAL DOMINANT 19	Adrenal cortical neoplasm: likely pathogenic,other,pathogenic; Adenocarcinoma of prostate: likely pathogenic,other,pathogenic; Adenocarcinoma of stomach: likely pathogenic,other,pathogenic,uncertain significance; Adrenocortical carcinoma: likely pathogenic,other,pathogenic,uncertain significance; Carcinoma of colon: likely pathogenic,other,pathogenic; Carcinoma of esophagus: likely pathogenic,oth…	HP:0011530:Retinal hole; HP:0430000:Abnormality of the frontal bone; HP:0010939:Abnormality of the nasal bone; HP:0012286:Abnormal hypothalamus morphology; HP:0010576:Intracranial cystic lesion; HP:0030588:Abnormal visual field test; HP:0002605:Hepatic necrosis; HP:0025160:Abnormal temper tantrums; HP:0100245:Desmoid tumors; HP:0001117:Sudden loss of visual acuity; HP:0030434:Pilomatrixoma; HP:00…	Urea	Absent antitragus; CATARACT 32, MULTIPLE TYPES; Colorectal Tubular Adenoma; Dentinogenic Ghost Cell Tumor; EXUDATIVE VITREORETINOPATHY 7; Endometrioid adenoma, borderline malignancy; Extra-abdominal fibromatosis; Ghost Cell Odontogenic Carcinoma; MENTAL RETARDATION, AUTOSOMAL DOMINANT 19; Pancreaticobiliary Malunion; Pleomorphic lobular carcinoma in situ of breast; Pulmonary Artery Intimal Sarcom…	2054	2698	[{"UniProt":"P35222","EnsemblGene":["ENSG00000168036"],"EnsemblTrans":[["ENST00000349496","ENSP00000344456","principal2"],["ENST00000396183","ENSP00000379486","principal2"],["ENST00000396185","ENSP00000379488","principal2"],["ENST00000405570","ENSP00000385604","principal2"],["ENST00000431914","ENSP00000412219","principal2"],["ENST00000433400","ENSP00000387455","principal2"],["ENST00000441708","EN…		Distribution: Detected in all; Specificity: Low tissue specificity	Membranous expression in most tissues.; antibody: Most normal tissues displayed strong membranous and cytoplasmic positivity. Blood vessels were positive. Cells in CNS and in lymphoid organs were mainly weak or negative.	Antibody: Most malignant tissues displayed strong membranous and cytoplasmic positivity. Malignant lymphomas were negative.
1	CXCR4	7852	CD184|D2S201E|FB22|HM89|HSY3RR|LAP-3|LAP3|LCR1|LESTR|NPY3R|NPYR|NPYRL|NPYY3R|WHIM|WHIMS	This gene encodes a CXC chemokine receptor specific for stromal cell-derived factor-1. The protein has 7 transmembrane regions and is located on the cell surface. It acts with the CD4 protein to support HIV entry into cells and is also highly expressed in breast cancer cells. Mutations in this gene have been associated with WHIM (warts, hypogammaglobulinemia, infections, and myelokathexis) syndro…	CXCR4 (C-X-C Motif Chemokine Receptor 4) is a Protein Coding gene. Diseases associated with CXCR4 include Whim Syndrome and Macroglobulinemia. Among its related pathways are Neuroscience and Signaling by GPCR. Gene Ontology (GO) annotations related to this gene include G protein-coupled receptor activity and ubiquitin protein ligase binding. An important paralog of this gene is CXCR2.	Receptor for the C-X-C chemokine CXCL12/SDF-1 that transduces a signal by increasing intracellular calcium ion levels and enhancing MAPK1/MAPK3 activation (PubMed:10452968, PubMed:28978524, PubMed:18799424, PubMed:24912431). Involved in the AKT signaling cascade (PubMed:24912431). Plays a role in regulation of cell migration, e.g. during wound healing (PubMed:28978524). Acts as a receptor for ext…	23 18	12 17	25 22	24 25	C-X-C motif chemokine receptor 4	chr2:136118149-136114349	symbol	H. sapiens	protein-coding	This gene encodes a CXC chemokine receptor specific for stromal cell-derived factor-1. The protein has 7 transmembrane regions and is located on the cell surface. It acts with the CD4 protein to support HIV entry into cells and is also highly expressed in breast cancer cells. Mutations in this gene have been associated with WHIM (warts, hypogammaglobulinemia, infections, and myelokathexis) syndro…	GO:0038159 C-X-C chemokine receptor CXCR4 signaling pathway;GO:0038160 CXCL12-activated CXCR4 signaling pathway;GO:2000448 positive regulation of macrophage migration inhibitory factor signaling pathway	[GO:0007165] signal transduction; [GO:0008150] biological_process; [GO:0005575] cellular_component; [GO:0040011] locomotion; [GO:0003674] molecular_function; [GO:0005886] plasma membrane; [GO:0005737] cytoplasm; [GO:0005622] intracellular; [GO:0043226] organelle; [GO:0031410] cytoplasmic vesicle; [GO:0005768] endosome; [GO:0008092] cytoskeletal protein binding; [GO:0005773] vacuole; [GO:0005764] …	GO:0005770 late endosome;GO:0005769 early endosome;GO:0009897 external side of plasma membrane	GO:0038147 C-X-C motif chemokine 12 receptor activity;GO:0016494 C-X-C chemokine receptor activity;GO:0032027 myosin light chain binding		CD markers; G-protein coupled receptors:GPCRs excl olfactory receptors; FDA approved drug targets:Small molecule drugs; Disease related genes; Transporters; Cancer-related genes:Candidate cancer biomarkers; G-protein coupled receptors:Chemokines and chemotactic factors receptors	[IPR000276] G protein-coupled receptor, rhodopsin-like; [IPR000355] Chemokine receptor family; [IPR001277] CXC chemokine receptor 4/atypical chemokine receptor 2; [IPR017452] GPCR, rhodopsin-like, 7TM; [IPR022726] CXC chemokine receptor 4 N-terminal domain				yes	yes			yes	MP:0005367 renal/urinary system phenotype; MP:0005385 cardiovascular system phenotype; MP:0010768 mortality/aging; MP:0005369 muscle phenotype; MP:0005376 homeostasis/metabolism phenotype; MP:0005384 cellular phenotype; MP:0005378 growth/size/body region phenotype; MP:0005381 digestive/alimentary phenotype; MP:0005387 immune system phenotype; MP:0005389 reproductive system phenotype; MP:0003631 n…	[ORPHA:51636] WHIM SYNDROME	OMIM ID:162643 Chemokine, cxc motif, receptor 4	Inherited Immunodeficiency Diseases; Warts, hypogammaglobulinemia, infections, and myelokathexis; Myelokathexis, isolated	Alcoholism;Neuroblastoma	Arthritis, Juvenile;Asthma;Forced Expiratory Volume;Toluene 2,4-Diisocyanate		Myelokathexis, isolated: pathogenic; Warts, hypogammaglobulinemia, infections, and myelokathexis: pathogenic	HP:0031160:Myelokathexis; HP:0011992:Abnormality of neutrophil morphology; HP:0000166:Severe periodontitis; HP:0002244:Abnormality of the small intestine; HP:0011850:Parotitis; HP:0030079:Cervix cancer; HP:0025439:Pharyngitis; HP:0002840:Lymphadenitis; HP:0012056:Cutaneous melanoma; HP:0001045:Vitiligo; HP:0000055:Abnormality of female external genitalia; HP:0005561:Abnormality of bone marrow cel…	Framycetin; AMD-070; Plerixafor; Ibalizumab	MYELOKATHEXIS, ISOLATED; Abnormality of neutrophil morphology; Abnormality of the small intestine; Hyperviscosity syndrome; Radiation-induced liver disease; Splenosis; Stage II Cutaneous Melanoma AJCC v6 and v7; stage II melanoma; Neonatal Late-Onset Sepsis; Secondary Focal Segmental Glomerulosclerosis; Secondary malignant neoplasm of prostate; Chromosome 6, monosomy 6q; Combined immunodeficiency…	1406	1935	[{"UniProt":"P61073","EnsemblGene":["ENSG00000121966"],"RefSeq":[["NM_001348056","NP_001334985","REVIEWED"],["NM_001348059","NP_001334988","REVIEWED"],["NM_001348060","NP_001334989","REVIEWED"]],"UCSC":["uc002tuy.3"],"SwissProt":["CXCR4_HUMAN"]},{"UniProt":"A0A0U3FJG0","RefSeq":[["NM_001348059","NP_001334988","REVIEWED"]],"SwissProt":["A0A0U3FJG0_HUMAN"]},{"UniProt":"A0A0U3GXA9","RefSeq":[["NM_00…		Distribution: Detected in many; Specificity: Tissue enhanced
1	DNMT3A	1788	DNMT3A2|HESJAS|M.HsaIIIA|TBRS	CpG methylation is an epigenetic modification that is important for embryonic development, imprinting, and X-chromosome inactivation. Studies in mice have demonstrated that DNA methylation is required for mammalian development. This gene encodes a DNA methyltransferase that is thought to function in de novo methylation, rather than maintenance methylation. The protein localizes to the cytoplasm a…	DNMT3A (DNA Methyltransferase 3 Alpha) is a Protein Coding gene. Diseases associated with DNMT3A include Tatton-Brown-Rahman Syndrome and Heyn-Sproul-Jackson Syndrome. Among its related pathways are One carbon pool by folate and Validated targets of C-MYC transcriptional repression. Gene Ontology (GO) annotations related to this gene include identical protein binding and methyltransferase activit…	Required for genome-wide de novo methylation and is essential for the establishment of DNA methylation patterns during development. DNA methylation is coordinated with methylation of histones. It modifies DNA in a non-processive manner and also methylates non-CpG sites. May preferentially methylate DNA linker between 2 nucleosomal cores and is inhibited by histone H1. Plays a role in paternal and…	14 16	17 17	18 19	12 12	DNA methyltransferase 3 alpha	chr2:25342590-25227874	symbol	H. sapiens	protein-coding	CpG methylation is an epigenetic modification that is important for embryonic development, imprinting, and X-chromosome inactivation. Studies in mice have demonstrated that DNA methylation is required for mammalian development. This gene encodes a DNA methyltransferase that is thought to function in de novo methylation, rather than maintenance methylation. The protein localizes to the cytoplasm a…	GO:0090116 C-5 methylation of cytosine;GO:0032776 DNA methylation on cytosine;GO:0043045 DNA methylation involved in embryo development	[GO:0003674] molecular_function; [GO:0008168] methyltransferase activity; [GO:0008150] biological_process; [GO:0034641] cellular nitrogen compound metabolic process; [GO:0006259] DNA metabolic process; [GO:0005575] cellular_component; [GO:0005622] intracellular; [GO:0043226] organelle; [GO:0005634] nucleus; [GO:0005737] cytoplasm; [GO:0043167] ion binding; [GO:0005654] nucleoplasm; [GO:0003677] D…	GO:0001741 XY body;GO:0000803 sex chromosome;GO:0005720 nuclear heterochromatin	GO:0003886 DNA (cytosine-5-)-methyltransferase activity;GO:0009008 DNA-methyltransferase activity;GO:0008757 S-adenosylmethionine-dependent methyltransferase activity		Predicted intracellular proteins; Disease related genes; Transcription factors:Zinc-coordinating DNA-binding domains; Cancer-related genes:Mutational cancer driver genes; Enzymes; Potential drug targets; ENZYME proteins:Transferases; Cancer-related genes:Mutated cancer genes	[IPR000313] PWWP domain; [IPR001525] C-5 cytosine methyltransferase; [IPR018117] DNA methylase, C-5 cytosine-specific, active site; [IPR025766] ADD domain; [IPR029063] S-adenosyl-L-methionine-dependent methyltransferase; [IPR030487] DNA (cytosine-5)-methyltransferase 3A; [IPR040552] DNMT3, cysteine rich ADD domain	Nucleoplasm (reliability'])					yes			MP:0010768 mortality/aging; MP:0005384 cellular phenotype; MP:0005378 growth/size/body region phenotype; MP:0005386 behavior/neurological phenotype; MP:0005387 immune system phenotype; MP:0005389 reproductive system phenotype; MP:0003631 nervous system phenotype; MP:0005390 skeleton phenotype; MP:0005397 hematopoietic system phenotype; MP:0005379 endocrine/exocrine gland phenotype; MP:0005380 emb…	[ORPHA:404443] Tall stature-intellectual disability-facial dysmorphism syndrome	OMIM ID:602769 Dna methyltransferase 3a	Intellectual disability; Tatton-Brown-rahman syndrome; Acute myeloid leukemia; Myeloproliferative disorder; HEYN-SPROUL-JACKSON SYNDROME; Multiple myeloma; Glioblastoma; Inborn genetic diseases; Lung adenocarcinoma; Myelodysplastic syndrome; Early T cell progenitor acute lymphoblastic leukemia	Body Mass Index;Platelet Function Tests	Body Height;Crohn Disease;Ossification of the posterior longitudinal ligament of the spine;Waist Circumference	[No disease mim] Microcephalic primordial dwarfism; [No disease mim] Tatton-Brown Rahman syndrome (OVERGROWTH SYNDROME WITH INTELLECTUAL DISABILITY)	Acute myeloid leukemia: likely pathogenic,pathogenic,uncertain significance; Clinvar: phenotype not specified: likely pathogenic,pathogenic,uncertain significance; Early t cell progenitor acute lymphoblastic leukemia: pathogenic; Inborn genetic diseases: likely pathogenic,pathogenic,uncertain significance; Lung adenocarcinoma: likely pathogenic,pathogenic,uncertain significance; Myelodysplastic s…	HP:0011688:Supraventricular tachycardia with an accessory connection mediated pathway; HP:0011407:Proportionate tall stature; HP:0100634:Neuroendocrine neoplasm; HP:0008094:Widely spaced toes; HP:0040197:Encephalomalacia; HP:0001566:Widely-spaced maxillary central incisors; HP:0012324:Myeloid leukemia; HP:0003508:Proportionate short stature; HP:0002000:Short columella; HP:0007099:Arnold-Chiari ty…	Procaine	Proportionate tall stature; Supraventricular tachycardia with an accessory connection mediated pathway; Tatton Brown Rahman syndrome; Psychotic behaviour; Widely spaced toes; LEUKEMIA, ACUTE LYMPHOBLASTIC, SUSCEPTIBILITY TO, 3; Widely-spaced maxillary central incisors; Acute myeloid leukemia with mutated NPM1; Encephalomalacia; Facies; secondary myelodysplastic syndromes; Invasive pituitary adeno…	378	444	[{"UniProt":"F8WE91","EnsemblGene":["ENSG00000119772"],"EnsemblTrans":[["ENST00000380756","ENSP00000370132",""]],"RefSeq":[["XM_011532664","XP_011530966","MODEL"]],"UCSC":["uc061hex.1"],"SwissProt":["F8WE91_HUMAN"]},{"UniProt":"A0A0C4DG02","EnsemblGene":["ENSG00000119772"],"EnsemblTrans":[["ENST00000402667","ENSP00000384237",""]],"RefSeq":[["XM_005264177","XP_005264234"],["XM_011532667","XP_01153…	colon;larynx	Distribution: Detected in all; Specificity: Low tissue specificity	Ubiquitous nuclear expression.; antibody: Most normal cells showed weak to moderate nuclear and cytoplasmic staining. Strong nuclear staining was seen in lymph node and trophoblastic cells. Nucleus was moderately stained in most surface epithelial cells.	Antibody: Most cancer cells showed nuclear and cytoplasmic staining of varying intensity. Lymphomas were mainly negative.
1	ELL	8178	C19orf17|ELL1|MEN|PPP1R68		ELL (Elongation Factor For RNA Polymerase II) is a Protein Coding gene. Diseases associated with ELL include Leukemia and Childhood Leukemia. Among its related pathways are Transcription-Coupled Nucleotide Excision Repair (TC-NER) and HIV Transcription Elongation. Gene Ontology (GO) annotations related to this gene include phosphatase binding. An important paralog of this gene is ELL2.	Elongation factor component of the super elongation complex (SEC), a complex required to increase the catalytic rate of RNA polymerase II transcription by suppressing transient pausing by the polymerase at multiple sites along the DNA. Elongation factor component of the little elongation complex (LEC), a complex required to regulate small nuclear RNA (snRNA) gene transcription by RNA polymerase I…	22 14	29 20	28 19	25 13	elongation factor for RNA polymerase II	chr19:18522070-18442663	symbol	H. sapiens	protein-coding		GO:0042796 snRNA transcription by RNA polymerase III;GO:0045945 positive regulation of transcription by RNA polymerase III;GO:0032968 positive regulation of transcription elongation from RNA polymerase II promoter	[GO:0008150] biological_process; [GO:0034641] cellular nitrogen compound metabolic process; [GO:0009058] biosynthetic process; [GO:0005575] cellular_component; [GO:0005622] intracellular; [GO:0043226] organelle; [GO:0032991] protein-containing complex; [GO:0005634] nucleus; [GO:0005654] nucleoplasm; [GO:0003674] molecular_function; [GO:0019899] enzyme binding; [GO:0005694] chromosome; [GO:0048856…	GO:0035363 histone locus body;GO:0035327 transcriptionally active chromatin;GO:0008023 transcription elongation factor complex	GO:0019902 phosphatase binding;GO:0019899 enzyme binding;GO:0005515 protein binding		Predicted intracellular proteins; Disease related genes; Cancer-related genes	[IPR010844] Occludin homology domain; [IPR019464] RNA polymerase II elongation factor ELL, N-terminal; [IPR031176] ELL/occludin family; [IPR031184] RNA polymerase II elongation factor ELL; [IPR036390] Winged helix DNA-binding domain superfamily; [IPR042065] E3 ubiquitin-protein ligase ELL-like							principal1		MP:0010768 mortality/aging		OMIM ID:600284 Elongation factor rna polymerase ii		Fluorescence	Breast Neoplasms;Hypersensitivity;Metabolism					Acute myeloid leukemia, minimal differentiation; Treatment related acute myeloid leukaemia; Adult Acute Monocytic Leukemia; Childhood Acute Monocytic Leukemia; M5b Acute differentiated monocytic leukemia; Leukemia, Myelomonocytic, Chronic; Von Hippel-Lindau Syndrome; Juvenile Myelomonocytic Leukemia; MIXED LINEAGE LEUKEMIA; Neoplasm, Residual; Corpuscular Hemoglobin Concentration Mean; Acute mono…	11	62	[{"UniProt":"P55199","EnsemblGene":["ENSG00000105656"],"EnsemblTrans":[["ENST00000262809","ENSP00000262809","principal1"]],"RefSeq":[["NM_006532","NP_006523","VALIDATED"]],"UCSC":["uc002njh.3"],"SwissProt":["ELL_HUMAN"]},{"UniProt":"U3KQ90","EnsemblGene":["ENSG00000105656"],"EnsemblTrans":[["ENST00000596124","ENSP00000475648",""]],"RefSeq":[["XM_017027335","XP_016882824","MODEL"]],"UCSC":["uc002n…	blood	Distribution: Detected in all; Specificity: Low tissue specificity	Mainly nuclear expression in several tissues.; antibody: Most tissues showed weak to moderate nuclear and/or cytoplasmic positivity. Endothelial cells showed distinct cytoplasmic staining. Pneumocytes, pancreas, salivary glands, breast, cells of CNS, spleen, ovary, fallopian tube, smooth and skeletal muscle were negative.	Antibody: Colorectal, ovarian, cervical and testicular cancers along with several urothelial, pancreatic, skin and thyroid cancers displayed weak to moderate nuclear positivity. Weak to moderate cytoplasmic positivity was observed in liver cancers. Remaining cancer tissues were in general negative.
1	ERCC2	2068	COFS2|EM9|TFIIH|TTD|TTD1|XPD	The nucleotide excision repair pathway is a mechanism to repair damage to DNA. The protein encoded by this gene is involved in transcription-coupled nucleotide excision repair and is an integral member of the basal transcription factor BTF2/TFIIH complex. The gene product has ATP-dependent DNA helicase activity and belongs to the RAD3/XPD subfamily of helicases. Defects in this gene can result in…	ERCC2 (ERCC Excision Repair 2, TFIIH Core Complex Helicase Subunit) is a Protein Coding gene. Diseases associated with ERCC2 include Xeroderma Pigmentosum, Complementation Group D and Cerebrooculofacioskeletal Syndrome 2. Among its related pathways are RNA Polymerase II Transcription Initiation And Promoter Clearance and Transcription-Coupled Nucleotide Excision Repair (TC-NER). Gene Ontology (GO…	ATP-dependent 5'-3' DNA helicase, component of the general transcription and DNA repair factor IIH (TFIIH) core complex, which is involved in general and transcription-coupled nucleotide excision repair (NER) of damaged DNA and, when complexed to CAK, in RNA transcription by RNA polymerase II. In NER, TFIIH acts by opening DNA around the lesion to allow the excision of the damaged oligonucleotide…	19 15	19 24	24 17	21 20	ERCC excision repair 2, TFIIH core complex helicase subunit	chr19:45370647-45349837	symbol	H. sapiens	protein-coding	The nucleotide excision repair pathway is a mechanism to repair damage to DNA. The protein encoded by this gene is involved in transcription-coupled nucleotide excision repair and is an integral member of the basal transcription factor BTF2/TFIIH complex. The gene product has ATP-dependent DNA helicase activity and belongs to the RAD3/XPD subfamily of helicases. Defects in this gene can result in…	GO:0045951 positive regulation of mitotic recombination;GO:0032289 central nervous system myelin formation;GO:0040016 embryonic cleavage	[GO:0003674] molecular_function; [GO:0003677] DNA binding; [GO:0005575] cellular_component; [GO:0005622] intracellular; [GO:0043226] organelle; [GO:0005634] nucleus; [GO:0043167] ion binding; [GO:0016887] ATPase activity; [GO:0004386] helicase activity; [GO:0008150] biological_process; [GO:0051276] chromosome organization; [GO:0006950] response to stress; [GO:0034641] cellular nitrogen compound m…	GO:0070516 CAK-ERCC2 complex;GO:0071817 MMXD complex;GO:0000439 transcription factor TFIIH core complex	GO:0043139 5'-3' DNA helicase activity;GO:0051539 4 iron, 4 sulfur cluster binding;GO:0003684 damaged DNA binding		Predicted intracellular proteins; Disease related genes; ENZYME proteins:Hydrolases; Cancer-related genes:Candidate cancer biomarkers; Cancer-related genes:Mutational cancer driver genes; Enzymes; Potential drug targets; Cancer-related genes:Mutated cancer genes	[IPR001945] RAD3/XPD family; [IPR002464] DNA/RNA helicase, ATP-dependent, DEAH-box type, conserved site; [IPR006554] Helicase-like, DEXD box c2 type; [IPR006555] ATP-dependent helicase, C-terminal; [IPR010614] DEAD2; [IPR010643] Helical and beta-bridge domain; [IPR013020] ATP-dependent helicase Rad3/Chl1-like; [IPR014013] Helicase superfamily 1/2, ATP-binding domain, DinG/Rad3-type; [IPR027417] P…	Nucleoplasm (reliability']); Additional: Cytosol								MP:0010768 mortality/aging; MP:0005376 homeostasis/metabolism phenotype; MP:0005384 cellular phenotype; MP:0005378 growth/size/body region phenotype; MP:0005386 behavior/neurological phenotype; MP:0005387 immune system phenotype; MP:0002006 neoplasm; MP:0005389 reproductive system phenotype; MP:0003631 nervous system phenotype; MP:0005391 vision/eye phenotype; MP:0005390 skeleton phenotype; MP:00…	[ORPHA:1466] COFS syndrome; [ORPHA:33364] Trichothiodystrophy; [ORPHA:910] Xeroderma pigmentosum; [ORPHA:220295] Xeroderma pigmentosum-Cockayne syndrome complex	OMIM ID:126340 Excision repair, complementing defective, in chinese hamster, 2	Trichothiodystrophy; ERCC2-Related Disorders; Xeroderma pigmentosum, group D; Cerebrooculofacioskeletal syndrome 2; Xeroderma pigmentosum; Trichothiodystrophy 1, photosensitive; not specified; Metachromatic leukodystrophy variant; Inborn genetic diseases		Lung Neoplasms	[610756] CEREBRO-OCULO-FACIO-SKELETAL SYNDROME TYPE 2; [601675] TRICHOTHIODYSTROPHY PHOTOSENSITIVE; [278730] XERODERMA PIGMENTOSUM COMPLEMENTATION GROUP D	Cerebrooculofacioskeletal syndrome 2: likely pathogenic,not provided,pathogenic; Cerebro-oculo-facio-skeletal syndrome: pathogenic; Clinvar: phenotype not specified: likely pathogenic,not provided,pathogenic,uncertain significance; Ercc2-related disorders: pathogenic,uncertain significance; Inborn genetic diseases: likely pathogenic,pathogenic; Metachromatic leukodystrophy variant: likely pathoge…	HP:0410219:Hypoplasia of mandible relative to maxilla; HP:0007381:Congenital exfoliative erythroderma; HP:0010551:Paraplegia/paraparesis; HP:0012760:Impaired social reciprocity; HP:0002634:Arteriosclerosis; HP:0045055:Tiger tail banding; HP:0002562:Low-set nipples; HP:0010649:Flat nasal alae; HP:0009886:Trichorrhexis nodosa; HP:0001809:Split nail; HP:0007587:Numerous pigmented freckles; HP:010001…		Cerebrooculofacioskeletal Syndrome 2; Mixed phenotype acute leukemia T/myeloid; CAMFAK syndrome; Metachromatic leukodystrophy variant; Pena Shokeir syndrome Type 2; Photosensitive Trichothiodystrophy; Congenital exfoliative erythroderma; Hypoplasia of mandible relative to maxilla; Impaired social reciprocity; Paraplegia/paraparesis; Cerebrooculofacioskeletal Syndrome 1; Tiger tail banding; Abnorm…	728	849	[{"UniProt":"P18074","EnsemblGene":["ENSG00000104884"],"SwissProt":["ERCC2_HUMAN"]}]		Distribution: Detected in all; Specificity: Low tissue specificity	Nuclear and cytoplasmic expression in most tissues.; antibody: Most normal tissues showed weak to moderate nuclear positivity, with additional cytoplasmic staining in a few cases. Bone marrow and glial cells exhibited strong nuclear positivity.	Antibody: Gliomas displayed moderate nuclear staining in a majority of cases. Remaining tumours were weakly stained or negative.
1	ERCC3	2071	BTF2|GTF2H|RAD25|TFIIH|TTD2|XPB	This gene encodes an ATP-dependent DNA helicase that functions in nucleotide excision repair. The encoded protein is a subunit of basal transcription factor 2 (TFIIH) and, therefore, also functions in class II transcription. Mutations in this gene are associated with Xeroderma pigmentosum B, Cockayne's syndrome, and trichothiodystrophy. Alternative splicing results in multiple transcript variants…	ERCC3 (ERCC Excision Repair 3, TFIIH Core Complex Helicase Subunit) is a Protein Coding gene. Diseases associated with ERCC3 include Xeroderma Pigmentosum, Complementation Group B and Trichothiodystrophy 2, Photosensitive. Among its related pathways are RNA Polymerase II Transcription Initiation And Promoter Clearance and Transcription-Coupled Nucleotide Excision Repair (TC-NER). Gene Ontology (G…	ATP-dependent 3'-5' DNA helicase, component of the general transcription and DNA repair factor IIH (TFIIH) core complex, which is involved in general and transcription-coupled nucleotide excision repair (NER) of damaged DNA and, when complexed to CAK, in RNA transcription by RNA polymerase II. In NER, TFIIH acts by opening DNA around the lesion to allow the excision of the damaged oligonucleotide…	33 27	36 30	38 32	31 26	ERCC excision repair 3, TFIIH core complex helicase subunit	chr2:127294166-127257290	symbol	H. sapiens	protein-coding	This gene encodes an ATP-dependent DNA helicase that functions in nucleotide excision repair. The encoded protein is a subunit of basal transcription factor 2 (TFIIH) and, therefore, also functions in class II transcription. Mutations in this gene are associated with Xeroderma pigmentosum B, Cockayne's syndrome, and trichothiodystrophy. Alternative splicing results in multiple transcript variants…	GO:0006265 DNA topological change;GO:0009650 UV protection;GO:0006293 nucleotide-excision repair, preincision complex stabilization	[GO:0003674] molecular_function; [GO:0003677] DNA binding; [GO:0043167] ion binding; [GO:0016887] ATPase activity; [GO:0004386] helicase activity; [GO:0008150] biological_process; [GO:0051276] chromosome organization; [GO:0006950] response to stress; [GO:0034641] cellular nitrogen compound metabolic process; [GO:0006259] DNA metabolic process; [GO:0009058] biosynthetic process; [GO:0005575] cellu…	GO:0000112 nucleotide-excision repair factor 3 complex;GO:0097550 transcriptional preinitiation complex;GO:0000439 transcription factor TFIIH core complex	GO:0043138 3'-5' DNA helicase activity;GO:1990841 promoter-specific chromatin binding;GO:0003684 damaged DNA binding		Predicted intracellular proteins; Disease related genes; ENZYME proteins:Hydrolases; Cancer-related genes:Candidate cancer biomarkers; Enzymes; Potential drug targets	[IPR001161] Helicase XPB/Ssl2; [IPR001650] Helicase, C-terminal; [IPR006935] Helicase/UvrB, N-terminal; [IPR014001] Helicase superfamily 1/2, ATP-binding domain; [IPR027417] P-loop containing nucleoside triphosphate hydrolase; [IPR032438] ERCC3/RAD25/XPB helicase, C-terminal domain; [IPR032830] Helicase XPB/Ssl2, N-terminal domain	Nucleoplasm (reliability'])					yes	principal1		MP:0010768 mortality/aging; MP:0005376 homeostasis/metabolism phenotype; MP:0005384 cellular phenotype; MP:0010771 integument phenotype	[ORPHA:33364] Trichothiodystrophy; [ORPHA:910] Xeroderma pigmentosum; [ORPHA:220295] Xeroderma pigmentosum-Cockayne syndrome complex	OMIM ID:133510 Excision repair, complementing defective, in chinese hamster, 3	Xeroderma pigmentosum, complementation group b; Xeroderma pigmentosum; EMG: myopathic abnormalities; Myopathy; Euthyroid goiter; Elbow flexion contracture; Vitamin D deficiency; Knee flexion contracture; Hypomagnesemia; Difficulty walking; Generalized hypotonia; Seizures; not specified; Trichothiodystrophy 2, photosensitive	Child Development Disorders, Pervasive;Cholesterol, LDL;Hip;Waist-Hip Ratio	Diagnostic Self Evaluation	[601675] TRICHOTHIODYSTROPHY PHOTOSENSITIVE; [610651] XERODERMA PIGMENTOSUM COMPLEMENTATION GROUP B	Clinvar: phenotype not specified: likely pathogenic,not provided,pathogenic; Trichothiodystrophy 2, photosensitive: pathogenic; Xeroderma pigmentosum, complementation group b: pathogenic	HP:0003224:Increased cellular sensitivity to UV light; HP:0410219:Hypoplasia of mandible relative to maxilla; HP:0010551:Paraplegia/paraparesis; HP:0007381:Congenital exfoliative erythroderma; HP:0012760:Impaired social reciprocity; HP:0002634:Arteriosclerosis; HP:0045055:Tiger tail banding; HP:0002562:Low-set nipples; HP:0011400:Abnormal CNS myelination; HP:0010649:Flat nasal alae; HP:0001809:Sp…		TRICHOTHIODYSTROPHY 2, PHOTOSENSITIVE; Xeroderma Pigmentosum B-Cockayne Syndrome; Increased cellular sensitivity to UV light; Photosensitive Trichothiodystrophy; Congenital exfoliative erythroderma; Hypoplasia of mandible relative to maxilla; Impaired social reciprocity; Paraplegia/paraparesis; Cerebrooculofacioskeletal Syndrome 1; Tiger tail banding; Abnormality of amino acid metabolism; Flat na…	54	186	[{"UniProt":"P19447","EnsemblGene":["ENSG00000163161"],"EnsemblTrans":[["ENST00000285398","ENSP00000285398","principal1"]],"RefSeq":[["NM_000122","NP_000113","REVIEWED"]],"UCSC":["uc002toh.1"],"SwissProt":["ERCC3_HUMAN"]},{"UniProt":"B3KRG2","RefSeq":[["NM_001303416","NP_001290345","REVIEWED"]],"SwissProt":["B3KRG2_HUMAN"]},{"UniProt":"B3KTH1","RefSeq":[["NM_001303416","NP_001290345","REVIEWED"],…		Distribution: Detected in all; Specificity: Low tissue specificity	Ubiquitous nuclear expression.; antibody: Normal tissues showed moderate to strong nuclear and cytoplasmic staining.	Antibody: Cancer cells displayed moderate to strong nuclear and cytoplasmic staining.
1	ERCC4	2072	ERCC11|FANCQ|RAD1|XFEPS|XPF	The protein encoded by this gene forms a complex with ERCC1 and is involved in the 5' incision made during nucleotide excision repair. This complex is a structure specific DNA repair endonuclease that interacts with EME1. Defects in this gene are a cause of xeroderma pigmentosum complementation group F (XP-F), or xeroderma pigmentosum VI (XP6).[provided by RefSeq, Mar 2009]	ERCC4 (ERCC Excision Repair 4, Endonuclease Catalytic Subunit) is a Protein Coding gene. Diseases associated with ERCC4 include Xeroderma Pigmentosum, Complementation Group F and Fanconi Anemia, Complementation Group Q. Among its related pathways are Transcription-Coupled Nucleotide Excision Repair (TC-NER) and Platinum Pathway, Pharmacokinetics/Pharmacodynamics. Gene Ontology (GO) annotations re…	Catalytic component of a structure-specific DNA repair endonuclease responsible for the 5-prime incision during DNA repair. Involved in homologous recombination that assists in removing interstrand cross-link. XPF_HUMAN,Q92889	10 15	12 16	9 14	9 11	ERCC excision repair 4, endonuclease catalytic subunit	chr16:13920137-13952348	symbol	H. sapiens	protein-coding	The protein encoded by this gene forms a complex with ERCC1 and is involved in the 5' incision made during nucleotide excision repair. This complex is a structure specific DNA repair endonuclease that interacts with EME1. Defects in this gene are a cause of xeroderma pigmentosum complementation group F (XP-F), or xeroderma pigmentosum VI (XP6).[provided by RefSeq, Mar 2009]	GO:1905767 regulation of double-stranded telomeric DNA binding;GO:1905768 negative regulation of double-stranded telomeric DNA binding;GO:1901255 nucleotide-excision repair involved in interstrand cross-link repair	[GO:0005575] cellular_component; [GO:0005622] intracellular; [GO:0043226] organelle; [GO:0005634] nucleus; [GO:0003674] molecular_function; [GO:0003677] DNA binding; [GO:0008150] biological_process; [GO:0006950] response to stress; [GO:0034641] cellular nitrogen compound metabolic process; [GO:0006259] DNA metabolic process; [GO:0004518] nuclease activity; [GO:0005654] nucleoplasm; [GO:0007049] c…	GO:0000110 nucleotide-excision repair factor 1 complex;GO:0070522 ERCC4-ERCC1 complex;GO:0000109 nucleotide-excision repair complex	GO:1990599 3' overhang single-stranded DNA endodeoxyribonuclease activity;GO:0010521 telomerase inhibitor activity;GO:0001094 TFIID-class transcription factor complex binding		Cancer-related genes:Candidate cancer biomarkers; Disease related genes; Predicted intracellular proteins	[IPR006166] ERCC4 domain; [IPR006167] DNA repair protein XPF; [IPR010994] RuvA domain 2-like; [IPR011335] Restriction endonuclease type II-like	Nuclear bodies;Nucleoplasm (reliability']); Additional: Cell Junctions					yes			MP:0005370 liver/biliary system phenotype; MP:0010768 mortality/aging; MP:0005376 homeostasis/metabolism phenotype; MP:0005384 cellular phenotype; MP:0005378 growth/size/body region phenotype	[ORPHA:90321] Cockayne syndrome type 1; [ORPHA:84] Fanconi anemia; [ORPHA:910] Xeroderma pigmentosum; [ORPHA:220295] Xeroderma pigmentosum-Cockayne syndrome complex	OMIM ID:133520 Excision repair, complementing defective, in chinese hamster, 4	Fanconi anemia, complementation group Q; Cockayne syndrome; Xeroderma pigmentosum, group F; Xeroderma pigmentosum, type F/Cockayne syndrome; XFE progeroid syndrome; Pre-B-cell acute lymphoblastic leukemia	Blood Pressure;Body Height;Body Mass Index;Child Development Disorders, Pervasive;Personality;Personality Inventory;Platelet Function Tests;Stress Disorders, Post-Traumatic	Asthma;Bilirubin;Bronchodilator Agents;Conduct Disorder;Egg Hypersensitivity;HIV-1;Lung Volume Measurements;Metabolic Syndrome X;Schizophrenia;Sleep;Virus Diseases;Waist-Hip Ratio;abacavir;efavirenz	[615272] Fanconi anemia complementation group Q; [615272] Primordial Dwarfism; [278760] Xeroderma pigmentosum group F; [610965] XFE PROGEROID SYNDROME	Clinvar: phenotype not specified: likely pathogenic,pathogenic,uncertain significance; Fanconi anemia, complementation group q: pathogenic; Pre-b-cell acute lymphoblastic leukemia: pathogenic; Xeroderma pigmentosum, type f/cockayne syndrome: likely pathogenic,pathogenic; Xfe progeroid syndrome: pathogenic; Xeroderma pigmentosum, group f: likely pathogenic,pathogenic,uncertain significance	HP:0002011:Morphological abnormality of the central nervous system; HP:0031287:Seborrheic keratosis; HP:0005912:Biliary atresia; HP:0040012:Chromosome breakage; HP:0002634:Arteriosclerosis; HP:0010649:Flat nasal alae; HP:0007587:Numerous pigmented freckles; HP:0100012:Neoplasm of the eye; HP:0004337:Abnormality of amino acid metabolism; HP:0007485:Absence of subcutaneous fat; HP:0003079:Defective…		XERODERMA PIGMENTOSUM, TYPE F/COCKAYNE SYNDROME; XFE Progeroid Syndrome; FANCONI ANEMIA, COMPLEMENTATION GROUP Q; Tumor of Rete Testis; Abnormality of amino acid metabolism; Flat nasal alae; Xeroderma pigmentosum, group F; Numerous pigmented freckles; Absence of subcutaneous fat; Defective DNA repair after ultraviolet radiation damage; Cancer, Embryonal and Mixed; Neoplasms, Embryonal and Mixed; …	166	246	[{"UniProt":"Q92889","EnsemblGene":["ENSG00000175595"],"SwissProt":["XPF_HUMAN"]},{"UniProt":"A0A1W1GSK9","RefSeq":[["NM_005236","NP_005227","REVIEWED"]],"SwissProt":["A0A1W1GSK9_HUMAN"]},{"UniProt":"B4DXD8","RefSeq":[["XM_011522427","XP_011520729","MODEL"]],"SwissProt":["B4DXD8_HUMAN"]}]	mammary_gland	Distribution: Detected in all; Specificity: Low tissue specificity	antibody: Bronchus, gallbladder, islet cells in pancreas, kidney, urinary bladder, squamous epithelia, male genitalia and placenta showed moderate to strong nuclear positivity. Remaining cells were generally negative.; Nuclear expression in a majority of the tissues.	Antibody: Most malignancies showed moderate to strong nuclear positivity. Pancreatic, gastric, renal and malignant gliomas were generally weak or negative.
1	ERCC5	2073	COFS3|ERCC5-201|ERCM2|UVDR|XPG|XPGC	This gene encodes a single-strand specific DNA endonuclease that makes the 3' incision in DNA excision repair following UV-induced damage. The protein may also function in other cellular processes, including RNA polymerase II transcription, and transcription-coupled DNA repair. Mutations in this gene cause xeroderma pigmentosum complementation group G (XP-G), which is also referred to as xeroderm…	ERCC5 (ERCC Excision Repair 5, Endonuclease) is a Protein Coding gene. Diseases associated with ERCC5 include Xeroderma Pigmentosum, Complementation Group G and Cerebrooculofacioskeletal Syndrome 3. Among its related pathways are Transcription-Coupled Nucleotide Excision Repair (TC-NER) and Nucleotide excision repair. Gene Ontology (GO) annotations related to this gene include protein homodimeriz…	Single-stranded structure-specific DNA endonuclease involved in DNA excision repair. Makes the 3'incision in DNA nucleotide excision repair (NER). Acts as a cofactor for a DNA glycosylase that removes oxidized pyrimidines from DNA. May also be involved in transcription-coupled repair of this kind of damage, in transcription by RNA polymerase II, and perhaps in other processes too. ERCC5_HUMAN,P28…	23 31	21 39	31 44	30 39	ERCC excision repair 5, endonuclease	chr13:102846032-102875995	symbol	H. sapiens	protein-coding	This gene encodes a single-strand specific DNA endonuclease that makes the 3' incision in DNA excision repair following UV-induced damage. The protein may also function in other cellular processes, including RNA polymerase II transcription, and transcription-coupled DNA repair. Mutations in this gene cause xeroderma pigmentosum complementation group G (XP-G), which is also referred to as xeroderm…	GO:0009650 UV protection;GO:0010225 response to UV-C;GO:0006293 nucleotide-excision repair, preincision complex stabilization	[GO:0005575] cellular_component; [GO:0005622] intracellular; [GO:0043226] organelle; [GO:0005634] nucleus; [GO:0008150] biological_process; [GO:0006950] response to stress; [GO:0034641] cellular nitrogen compound metabolic process; [GO:0006259] DNA metabolic process; [GO:0003674] molecular_function; [GO:0004518] nuclease activity; [GO:0003677] DNA binding; [GO:0043167] ion binding; [GO:0008219] c…	GO:0000109 nucleotide-excision repair complex;GO:0005662 DNA replication factor A complex;GO:0043601 nuclear replisome	GO:0000405 bubble DNA binding;GO:0000217 DNA secondary structure binding;GO:0004520 endodeoxyribonuclease activity		Cancer-related genes:Candidate cancer biomarkers; Disease related genes; Predicted intracellular proteins	[IPR001044] XPG/Rad2 endonuclease, eukaryotes; [IPR006084] XPG/Rad2 endonuclease; [IPR006086] XPG-I domain; [IPR008918] Helix-hairpin-helix motif, class 2; [IPR019974] XPG conserved site; [IPR029060] PIN-like domain superfamily; [IPR036279] 5'-3' exonuclease, C-terminal domain superfamily; [IPR006085] XPG N-terminal	Nucleoplasm (reliability'])					yes			MP:0005370 liver/biliary system phenotype; MP:0010768 mortality/aging; MP:0005376 homeostasis/metabolism phenotype; MP:0005378 growth/size/body region phenotype; MP:0005381 digestive/alimentary phenotype; MP:0005387 immune system phenotype; MP:0005397 hematopoietic system phenotype; MP:0010771 integument phenotype; MP:0005380 embryo phenotype	[ORPHA:1466] COFS syndrome; [ORPHA:910] Xeroderma pigmentosum; [ORPHA:220295] Xeroderma pigmentosum-Cockayne syndrome complex	OMIM ID:133530 Excision repair, complementing defective, in chinese hamster, 5	Xeroderma pigmentosum; Xeroderma pigmentosum, group G; Cerebrooculofacioskeletal syndrome 3; Xeroderma pigmentosum and Cockayne syndrome complex; Cerebellar atrophy; Dysarthria; Abnormality of the corpus callosum; Polyneuropathy; Cognitive impairment; Pes cavus; Spastic paraplegia; Pectus excavatum; Xeroderma pigmentosum group g/Cockayne syndrome			[278780] XERODERMA PIGMENTOSUM COMPLEMENTATION GROUP G	Cerebrooculofacioskeletal syndrome 3: pathogenic; Clinvar: phenotype not specified: likely pathogenic,not provided; Pectus excavatum: likely pathogenic; Xeroderma pigmentosum group g/cockayne syndrome: pathogenic; Xeroderma pigmentosum: pathogenic,uncertain significance; Xeroderma pigmentosum and cockayne syndrome complex: pathogenic; Xeroderma pigmentosum, group g: likely pathogenic,not provided…	HP:0002634:Arteriosclerosis; HP:0010649:Flat nasal alae; HP:0007587:Numerous pigmented freckles; HP:0100012:Neoplasm of the eye; HP:0004337:Abnormality of amino acid metabolism; HP:0003079:Defective DNA repair after ultraviolet radiation damage; HP:0009755:Ankyloblepharon; HP:0001029:Poikiloderma; HP:0000621:Entropion; HP:0012740:Papilloma; HP:0000524:Conjunctival telangiectasia; HP:0006739:Squam…		Cerebrooculofacioskeletal Syndrome 3; Xeroderma Pigmentosum, Type G-Cockayne Syndrome; CAMFAK syndrome; Pena Shokeir syndrome Type 2; Cerebrooculofacioskeletal Syndrome 1; Abnormality of amino acid metabolism; Flat nasal alae; Numerous pigmented freckles; Xeroderma pigmentosum and Cockayne syndrome complex; Defective DNA repair after ultraviolet radiation damage; UV-Sensitive Syndrome; Ankyloblep…	207	270	[{"UniProt":"P28715","EnsemblGene":["ENSG00000134899"],"SwissProt":["ERCC5_HUMAN"]}]		Distribution: Detected in all; Specificity: Low tissue specificity	antibody: Most of the normal cells showed moderate to strong cytoplasmic and nuclear immunoreactivity. Additional membranous staining was observed in intestinal tract. The liver, smooth muscle cells, pancreatic islets, hematopoietic and glial cells were weakly stained or negative.; Ubiquitous nuclear and cytoplasmic expression.	Antibody: Most of the cancer cells showed moderate cytoplasmic and nuclear immunoreactivity. Several ovarian cancers along with cases of urothelial, colorectal, pancreatic and stomach cancers were strongly stained. A majority of endometrial, testis and renal cancers were weakly stained or negative.
1	EZH2	2146	ENX-1|ENX1|EZH2b|KMT6|KMT6A|WVS|WVS2	This gene encodes a member of the Polycomb-group (PcG) family. PcG family members form multimeric protein complexes, which are involved in maintaining the transcriptional repressive state of genes over successive cell generations. This protein associates with the embryonic ectoderm development protein, the VAV1 oncoprotein, and the X-linked nuclear protein. This protein may play a role in the hem…	EZH2 (Enhancer Of Zeste 2 Polycomb Repressive Complex 2 Subunit) is a Protein Coding gene. Diseases associated with EZH2 include Weaver Syndrome and Mantle Cell Lymphoma. Among its related pathways are Lysine degradation and PKMTs methylate histone lysines. Gene Ontology (GO) annotations related to this gene include sequence-specific DNA binding and chromatin binding. An important paralog of this…	Polycomb group (PcG) protein. Catalytic subunit of the PRC2/EED-EZH2 complex, which methylates 'Lys-9' (H3K9me) and 'Lys-27' (H3K27me) of histone H3, leading to transcriptional repression of the affected target gene. Able to mono-, di- and trimethylate 'Lys-27' of histone H3 to form H3K27me1, H3K27me2 and H3K27me3, respectively. Displays a preference for substrates with less methylation, loses ac…	8 6	11 8	11 7	13 10	enhancer of zeste 2 polycomb repressive complex 2 subunit	chr7:148884344-148807374	symbol	H. sapiens	protein-coding	This gene encodes a member of the Polycomb-group (PcG) family. PcG family members form multimeric protein complexes, which are involved in maintaining the transcriptional repressive state of genes over successive cell generations. This protein associates with the embryonic ectoderm development protein, the VAV1 oncoprotein, and the X-linked nuclear protein. This protein may play a role in the hem…	GO:0036333 hepatocyte homeostasis;GO:1904772 response to tetrachloromethane;GO:0035983 response to trichostatin A	[GO:0003674] molecular_function; [GO:0008168] methyltransferase activity; [GO:0008150] biological_process; [GO:0051276] chromosome organization; [GO:0006464] cellular protein modification process; [GO:0008283] cell population proliferation; [GO:0005575] cellular_component; [GO:0005622] intracellular; [GO:0043226] organelle; [GO:0005634] nucleus; [GO:0003677] DNA binding; [GO:0005694] chromosome; …	GO:0045120 pronucleus;GO:0035098 ESC/E(Z) complex;GO:0031519 PcG protein complex	GO:0046976 histone methyltransferase activity (H3-K27 specific);GO:0070878 primary miRNA binding;GO:0000979 RNA polymerase II core promoter sequence-specific DNA binding		Predicted intracellular proteins; Disease related genes; Cancer-related genes:Candidate cancer biomarkers; Cancer-related genes:Mutational cancer driver genes; Enzymes; Potential drug targets; ENZYME proteins:Transferases; Cancer-related genes:Mutated cancer genes	[IPR001005] SANT/Myb domain; [IPR001214] SET domain; [IPR021654] Histone-lysine N-methyltransferase EZH1/EZH2; [IPR026489] CXC domain; [IPR033467] Tesmin/TSO1-like CXC domain; [IPR041343] Polycomb repressive complex 2 subunit EZH1/EZH2, tri-helical domain; [IPR041355] Pre-SET CXC domain	Nucleoplasm (reliability'])					yes			MP:0005367 renal/urinary system phenotype; MP:0005385 cardiovascular system phenotype; MP:0010768 mortality/aging; MP:0005369 muscle phenotype; MP:0005376 homeostasis/metabolism phenotype; MP:0005384 cellular phenotype; MP:0005378 growth/size/body region phenotype; MP:0005387 immune system phenotype; MP:0002006 neoplasm; MP:0003631 nervous system phenotype; MP:0005390 skeleton phenotype; MP:00053…	[ORPHA:3447] Weaver syndrome	OMIM ID:601573 Enhancer of zeste 2 polycomb repressive complex 2 subunit	Weaver syndrome; Inborn genetic diseases; Malignant melanoma of skin; Non-Hodgkin lymphoma; Lymphoma; EZH2-related disorder	Platelet Function Tests		[614421] WEAVER SYNDROME 2	Clinvar: phenotype not specified: likely pathogenic; Inborn genetic diseases: likely pathogenic; Lymphoma: likely pathogenic; Malignant melanoma of skin: likely pathogenic; Non-hodgkin lymphoma: likely pathogenic; Weaver syndrome: likely pathogenic,pathogenic	HP:0200000:Dysharmonic bone age; HP:0003911:Flared humeral metaphysis; HP:0002834:Flared femoral metaphysis; HP:0001814:Deep-set nails; HP:0004689:Short fourth metatarsal; HP:0001848:Calcaneovalgus deformity; HP:0001212:Prominent fingertip pads; HP:0003066:Limited knee extension; HP:0001816:Thin nail; HP:0000034:Hydrocele testis; HP:0010300:Abnormally low-pitched voice; HP:0010751:Dimple chin; HP…	Tazemetostat; CPI-1205	Dysharmonic bone age; Upper Extremity Deformities, Congenital; COHEN-GIBSON SYNDROME; Flared humeral metaphysis; Fetal rhabdomyoma; Flared femoral metaphysis; Histiocytic and Dendritic Cell Neoplasm; Primary acquired melanosis; Weaver-Like Syndrome; Intraocular Medulloepithelioma; ovarian serous tumor; Cellular leiomyoma; Cementoma; Deep-set nails; Endometrial cystic hyperplasia; Diffuse large B-…	972	1105	[{"UniProt":"Q15910","EnsemblGene":["ENSG00000106462"],"SwissProt":["EZH2_HUMAN"]},{"UniProt":"S4S3R8","RefSeq":[["NM_152998","NP_694543","REVIEWED"]],"UCSC":["uc003wfc.3"],"SwissProt":["S4S3R8_HUMAN"]},{"UniProt":"A0A090N8E9","RefSeq":[["NM_004456","NP_004447","REVIEWED"],["XM_011515884","XP_011514186","MODEL"]],"SwissProt":["A0A090N8E9_HUMAN"]}]		Distribution: Detected in many; Specificity: Tissue enhanced	antibody: Strong nuclear staining was observed in cells in seminiferous ducts, hematopoietic cells, lymphoid cells, glandular cells of the gastrointestinal tract, squamous epithelial cells and trophoblastic cells. Most remaining normal tissues displayed weak nuclear staining or were negative.; Nuclear expression in several tissues, most abundant in testis and lymphoid tissues.	Antibody: Cancers showed moderate to strong nuclear staining. Renal cancers were weakly stained or negative in a few cases.
1	FANCA	2175	FA|FA-H|FA1|FAA|FACA|FAH|FANCH	The Fanconi anemia complementation group (FANC) currently includes FANCA, FANCB, FANCC, FANCD1 (also called BRCA2), FANCD2, FANCE, FANCF, FANCG, FANCI, FANCJ (also called BRIP1), FANCL, FANCM and FANCN (also called PALB2). The previously defined group FANCH is the same as FANCA. Fanconi anemia is a genetically heterogeneous recessive disorder characterized by cytogenetic instability, hypersensiti…	FANCA (FA Complementation Group A) is a Protein Coding gene. Diseases associated with FANCA include Fanconi Anemia, Complementation Group A and Neuroblastoma 1. Among its related pathways are BRCA1 Pathway and Chks in Checkpoint Regulation.	DNA repair protein that may operate in a postreplication repair or a cell cycle checkpoint function. May be involved in interstrand DNA cross-link repair and in the maintenance of normal chromosome stability. FANCA_HUMAN,O15360	5 5	3 5	7 5	9 9	FA complementation group A	chr16:89816647-89737549	symbol	H. sapiens	protein-coding	The Fanconi anemia complementation group (FANC) currently includes FANCA, FANCB, FANCC, FANCD1 (also called BRCA2), FANCD2, FANCE, FANCF, FANCG, FANCI, FANCJ (also called BRIP1), FANCL, FANCM and FANCN (also called PALB2). The previously defined group FANCH is the same as FANCA. Fanconi anemia is a genetically heterogeneous recessive disorder characterized by cytogenetic instability, hypersensiti…	GO:2000348 regulation of CD40 signaling pathway;GO:0023035 CD40 signaling pathway;GO:0045589 regulation of regulatory T cell differentiation	[GO:0008150] biological_process; [GO:0006950] response to stress; [GO:0034641] cellular nitrogen compound metabolic process; [GO:0006259] DNA metabolic process; [GO:0005575] cellular_component; [GO:0005622] intracellular; [GO:0043226] organelle; [GO:0032991] protein-containing complex; [GO:0005634] nucleus; [GO:0005654] nucleoplasm; [GO:0005737] cytoplasm; [GO:0003674] molecular_function; [GO:006…	GO:0043240 Fanconi anaemia nuclear complex;GO:0044451 nucleoplasm part;GO:0005654 nucleoplasm	GO:0005515 protein binding;GO:0005488 binding;GO:0003674 molecular_function		Disease related genes; Cancer-related genes:Mutational cancer driver genes; Predicted intracellular proteins	[IPR003516] Fanconi anaemia group A protein; [IPR031729] Fanconi anaemia group A protein, N-terminal domain	Nucleoplasm (reliability'])				yes				MP:0005385 cardiovascular system phenotype; MP:0010768 mortality/aging; MP:0005376 homeostasis/metabolism phenotype; MP:0005384 cellular phenotype; MP:0005378 growth/size/body region phenotype; MP:0005389 reproductive system phenotype; MP:0005391 vision/eye phenotype; MP:0005390 skeleton phenotype; MP:0005397 hematopoietic system phenotype; MP:0005379 endocrine/exocrine gland phenotype; MP:000538…	[ORPHA:84] Fanconi anemia	OMIM ID:607139 Fanca gene	Fanconi anemia; Fanconi anemia, complementation group A; Absent thumb; Absent radius; Atrial septal defect; not specified		Coffee;Hair Color;Homocysteine;Melanosis;Schizophrenia;Skin;Vitiligo	[227650] FANCONI ANEMIA COMPLEMENTATION GROUP A	Blood protein levels: other,pathogenic; Clinvar: phenotype not specified: likely pathogenic,not provided,other,pathogenic,uncertain significance; Fanconi anemia, complementation group a: likely pathogenic,not provided,pathogenic,uncertain significance; Fumarylacetoacetase pseudodeficiency: other,pathogenic; Fanconi anemia: likely pathogenic,not provided,pathogenic,uncertain significance; Hypertyr…	HP:0003213:Deficient excision of UV-induced pyrimidine dimers in DNA; HP:0003214:Prolonged G2 phase of cell cycle; HP:0009943:Complete duplication of thumb phalanx; HP:0003221:Chromosomal breakage induced by crosslinking agents; HP:0001017:Anemic pallor; HP:0000081:Duplicated collecting system; HP:0001896:Reticulocytopenia; HP:0010293:Aplasia/Hypoplasia of the uvula; HP:0100587:Abnormality of the…		Estren-Dameshek Variant of Fanconi Anemia; Estren-Dameshek Variant of Fanconi Pancytopenia; Growth retardation, pre- and postnatal; Deficient excision of UV-induced pyrimidine dimers in DNA; FANCONI ANEMIA, COMPLEMENTATION GROUP N; Prolonged G2 phase of cell cycle; Anemic pallor; Chromosomal breakage induced by crosslinking agents; Complete duplication of thumb phalanx; Anemia in children; Reticu…	70	203	[{"UniProt":"O15360","EnsemblGene":["ENSG00000187741"],"SwissProt":["FANCA_HUMAN"]}]	cervix	Distribution: Detected in many; Specificity: Tissue enhanced
1	FCGR2B	2213	CD32|CD32B|FCG2|FCGR2|FCGR2C|FcRII-c|IGFR2	The protein encoded by this gene is a low affinity receptor for the Fc region of immunoglobulin gamma complexes. The encoded protein is involved in the phagocytosis of immune complexes and in the regulation of antibody production by B-cells. Variations in this gene may increase susceptibilty to systemic lupus erythematosus (SLE). Several transcript variants encoding different isoforms have been f…	FCGR2B (Fc Fragment Of IgG Receptor IIb) is a Protein Coding gene. Diseases associated with FCGR2B include Systemic Lupus Erythematosus and Malaria. Among its related pathways are B cell receptor signaling pathway (KEGG) and Tuberculosis. Gene Ontology (GO) annotations related to this gene include IgG binding. An important paralog of this gene is FCGR2C.	Receptor for the Fc region of complexed or aggregated immunoglobulins gamma. Low affinity receptor. Involved in a variety of effector and regulatory functions such as phagocytosis of immune complexes and modulation of antibody production by B-cells. Binding to this receptor results in down-modulation of previous state of cell activation triggered via antigen receptors on B-cells (BCR), T-cells (T…	14 29	7 14	11 11	20 46	Fc fragment of IgG receptor IIb	chr1:161647243-161678654	symbol	H. sapiens	protein-coding	The protein encoded by this gene is a low affinity receptor for the Fc region of immunoglobulin gamma complexes. The encoded protein is involved in the phagocytosis of immune complexes and in the regulation of antibody production by B-cells. Variations in this gene may increase susceptibilty to systemic lupus erythematosus (SLE). Several transcript variants encoding different isoforms have been f…	GO:0001811 negative regulation of type I hypersensitivity;GO:0001797 negative regulation of type IIa hypersensitivity;GO:0001814 negative regulation of antibody-dependent cellular cytotoxicity	[GO:0008150] biological_process; [GO:0006810] transport; [GO:0016192] vesicle-mediated transport; [GO:0002376] immune system process; [GO:0005886] plasma membrane; [GO:0005575] cellular_component; [GO:0007165] signal transduction; [GO:0003674] molecular_function; [GO:0044403] symbiotic process; [GO:0008219] cell death; [GO:0006950] response to stress; [GO:0006464] cellular protein modification pr…	GO:0043197 dendritic spine;GO:0044309 neuron spine;GO:0009897 external side of plasma membrane	GO:0019770 IgG receptor activity;GO:0019772 low-affinity IgG receptor activity;GO:0019763 immunoglobulin receptor activity		CD markers; Disease related genes; Cancer-related genes; FDA approved drug targets:Biotech drugs	[IPR003598] Immunoglobulin subtype 2; [IPR003599] Immunoglobulin subtype; [IPR007110] Immunoglobulin-like domain; [IPR013783] Immunoglobulin-like fold; [IPR036179] Immunoglobulin-like domain superfamily				yes	yes			yes	MP:0005367 renal/urinary system phenotype; MP:0005370 liver/biliary system phenotype; MP:0005385 cardiovascular system phenotype; MP:0010768 mortality/aging; MP:0005376 homeostasis/metabolism phenotype; MP:0005384 cellular phenotype; MP:0005378 growth/size/body region phenotype; MP:0005386 behavior/neurological phenotype; MP:0005381 digestive/alimentary phenotype; MP:0005387 immune system phenoty…	[ORPHA:536] Systemic lupus erythematosus	OMIM ID:604590 Fc fragment of igg, low affinity iib, receptor for					Malaria, resistance to: protective,risk factor; Systemic lupus erythematosus, susceptibility to: protective,risk factor	HP:0025300:Malar rash; HP:0003613:Antiphospholipid antibody positivity; HP:0000123:Nephritis; HP:0002102:Pleuritis; HP:0001701:Pericarditis; HP:0003493:Antinuclear antibody positivity; HP:0002725:Systemic lupus erythematosus; HP:0001878:Hemolytic anemia; HP:0001882:Leukopenia; HP:0000709:Psychosis; HP:0000992:Cutaneous photosensitivity; HP:0001369:Arthritis; HP:0001873:Thrombocytopenia; HP:000125…	Etanercept; Human immunoglobulin G; Abciximab; Tositumomab; Alemtuzumab; Antithymocyte immunoglobulin (rabbit); Palivizumab; Daclizumab; Bevacizumab; Sarilumab	Idiopathic thrombocytopenia; Immune Hemolytic Anemia; Villitis of unknown etiology; SYSTEMIC LUPUS ERYTHEMATOSUS, SUSCEPTIBILITY TO; stage, chronic lymphocytic leukemia; Collagenous Sprue; Phospholipidosis; Food anaphylaxis; Leukocytoclastic vasculitis; Butterfly rash; Thrombocytopenic purpura; Erythroblastosis, Fetal; Periodontal infection; Antiphospholipid antibody positivity; Vasculitis, Leuko…	157	203	[{"UniProt":"P31994","EnsemblGene":["ENSG00000072694"],"RefSeq":[["XM_017000671","XP_016856160"],["XM_017000672","XP_016856161"]],"SwissProt":["FCG2B_HUMAN"]}]	placenta	Distribution: Detected in many; Specificity: Group enriched	Cytoplasmic expression in endothelial cells in placenta and subsets of lymphoid cells.; antibody: Most normal cells were weakly stained or negative. Subsets of lymphoid tissue, throphoblastic cells and endothelium showed strong cytoplasmic staining.	Antibody: Most cancer tissues were negative. A few cases of lymphomas showed strong cytoplasmic staining.
1	FGFR1	2260	BFGFR|CD331|CEK|ECCL|FGFBR|FGFR-1|FLG|FLT-2|FLT2|HBGFR|HH2|HRTFDS|KAL2|N-SAM|OGD|bFGF-R-1	The protein encoded by this gene is a member of the fibroblast growth factor receptor (FGFR) family, where amino acid sequence is highly conserved between members and throughout evolution. FGFR family members differ from one another in their ligand affinities and tissue distribution. A full-length representative protein consists of an extracellular region, composed of three immunoglobulin-like do…	FGFR1 (Fibroblast Growth Factor Receptor 1) is a Protein Coding gene. Diseases associated with FGFR1 include Osteoglophonic Dysplasia and Hartsfield Syndrome. Among its related pathways are RET signaling and Respiratory electron transport, ATP synthesis by chemiosmotic coupling, and heat production by uncoupling proteins.. Gene Ontology (GO) annotations related to this gene include protein homodi…	Tyrosine-protein kinase that acts as cell-surface receptor for fibroblast growth factors and plays an essential role in the regulation of embryonic development, cell proliferation, differentiation and migration. Required for normal mesoderm patterning and correct axial organization during embryonic development, normal skeletogenesis and normal development of the gonadotropin-releasing hormone (Gn…	49 56	24 33	35 42	15 21	fibroblast growth factor receptor 1	chr8:38468635-38411143	symbol	H. sapiens	protein-coding	The protein encoded by this gene is a member of the fibroblast growth factor receptor (FGFR) family, where amino acid sequence is highly conserved between members and throughout evolution. FGFR family members differ from one another in their ligand affinities and tissue distribution. A full-length representative protein consists of an extracellular region, composed of three immunoglobulin-like do…	GO:1903465 positive regulation of mitotic cell cycle DNA replication;GO:2000830 positive regulation of parathyroid hormone secretion;GO:0048372 lateral mesodermal cell fate commitment	[GO:0005575] cellular_component; [GO:0005622] intracellular; [GO:0043226] organelle; [GO:0005634] nucleus; [GO:0003674] molecular_function; [GO:0008150] biological_process; [GO:0006464] cellular protein modification process; [GO:0016301] kinase activity; [GO:0043167] ion binding; [GO:0005886] plasma membrane; [GO:0008283] cell population proliferation; [GO:0005737] cytoplasm; [GO:0005829] cytosol…	GO:0043235 receptor complex;GO:0005887 integral component of plasma membrane;GO:0031226 intrinsic component of plasma membrane	GO:0090722 receptor-receptor interaction;GO:0005007 fibroblast growth factor-activated receptor activity;GO:0017134 fibroblast growth factor binding	Tyr protein kinase family	CD markers; Predicted intracellular proteins; FDA approved drug targets:Small molecule drugs; Transporters:Accessory Factors Involved in Transport; Disease related genes; Cancer-related genes:Candidate cancer biomarkers; Enzymes; Kinases:Tyr protein kinases; ENZYME proteins:Transferases; RAS pathway related proteins	[IPR000719] Protein kinase domain; [IPR001245] Serine-threonine/tyrosine-protein kinase, catalytic domain; [IPR003598] Immunoglobulin subtype 2; [IPR003599] Immunoglobulin subtype; [IPR007110] Immunoglobulin-like domain; [IPR008266] Tyrosine-protein kinase, active site; [IPR011009] Protein kinase-like domain superfamily; [IPR013098] Immunoglobulin I-set; [IPR013151] Immunoglobulin; [IPR013783] Im…				yes	yes	yes		yes	MP:0005385 cardiovascular system phenotype; MP:0010768 mortality/aging; MP:0005369 muscle phenotype; MP:0005376 homeostasis/metabolism phenotype; MP:0005384 cellular phenotype; MP:0005378 growth/size/body region phenotype; MP:0005386 behavior/neurological phenotype; MP:0005381 digestive/alimentary phenotype; MP:0005387 immune system phenotype; MP:0005389 reproductive system phenotype; MP:0003631 …	[ORPHA:2396] Encephalocraniocutaneous lipomatosis; [ORPHA:251579] Giant cell glioblastoma; [ORPHA:251576] Gliosarcoma; [ORPHA:2117] HARTSFIELD SYNDROME; [ORPHA:3366] Isolated trigonocephaly; [ORPHA:478] Kallmann Syndrome; [ORPHA:93924] Lobar holoprosencephaly; [ORPHA:280200] Microform holoprosencephaly; [ORPHA:168953] Myeloid/lymphoid neoplasm associated with FGFR1 rearrangement; [ORPHA:432] Norm…	OMIM ID:136350 Fibroblast growth factor receptor 1	Hypogonadotropic hypogonadism 2 with or without anosmia; Pfeiffer syndrome; Hypogonadotropic hypogonadism 7 with or without anosmia; Median cleft lip and palate; Bilateral cryptorchidism; Micropenis; Truncal obesity; Varicose veins; Gynecomastia; Osteoglophonic dysplasia; Hartsfield syndrome; Cerebellar vermis hypoplasia; Holoprosencephaly sequence; Astrocytoma; Adenocarcinoma of stomach; Brainst…	Arteries	Cleft Lip;Cleft Palate	[613001] Encephalocraniocutaneous lipomatosis; [615465] HARTSFIELD SYNDROME; [146110] IDIOPATHIC HYPOGONADOTROPIC HYPOGONADISM; [147950] KALLMANN SYNDROME TYPE 2; [166250] OSTEOGLOPHONIC DYSPLASIA; [101600] PFEIFFER SYNDROME	Adenocarcinoma of stomach: likely pathogenic,pathogenic; Astrocytoma: likely pathogenic,pathogenic; Brainstem glioma: likely pathogenic,pathogenic; Clinvar: phenotype not specified: likely pathogenic,pathogenic,risk factor,uncertain significance; Delayed puberty: likely pathogenic,pathogenic,risk factor; Encephalocraniocutaneous lipomatosis: likely pathogenic,pathogenic; Glioblastoma: likely path…	HP:0008439:Lumbar hemivertebrae; HP:0100251:Multiple central nervous system lipomas; HP:0006283:Multiple unerupted teeth; HP:0007546:Linear hyperpigmentation; HP:0005347:Cartilaginous trachea; HP:0005466:Hypoplasia of the frontal bone; HP:0008122:Calcaneonavicular fusion; HP:0002763:Abnormal cartilage morphology; HP:0005864:Pseudoarthrosis; HP:0011849:Abnormal bone ossification; HP:0011318:Bicoro…	Palifermin; Sorafenib; Heparin; 3-[4-(1-formylpiperazin-4-yl)-benzylidenyl]-2-indolinone; XL999; 3-(3-methoxybenzyl)-1H-pyrrolo[2,3-b]pyridine; (E)-[4-(3,5-Difluorophenyl)-3H-pyrrolo[2,3-b]pyridin-3-ylidene](3-methoxyphenyl)methanol; 3-[(3-(2-CARBOXYETHYL)-4-METHYLPYRROL-2-YL)METHYLENE]-2-INDOLINONE; Regorafenib; Ponatinib; Lenvatinib; Nintedanib; Fostamatinib; Erdafitinib; Pemigatinib; Selpercat…	Diencephalic Neoplasm; HYPOGONADOTROPIC HYPOGONADISM 2 WITH ANOSMIA; Holoprosencephaly, Ectrodactyly, and Bilateral Cleft Lip-Palate; Lumbar hemivertebra; Squamous cell (epidermoid) carcinoma; Abnormal cartilage morphology; Calcaneonavicular fusion; Cartilaginous trachea; Cutis Gyrata Syndrome of Beare And Stevenson; Hypoplasia of the frontal bone; Metastatic leiomyosarcoma; Multiple unerupted te…	448	631	[{"UniProt":"A0A3B3ISD1","EnsemblGene":["ENSG00000077782"],"EnsemblTrans":[["ENST00000649678","ENSP00000497266",""]],"RefSeq":[["XM_017013224","XP_016868713","MODEL"],["XM_017013225","XP_016868714","MODEL"]],"SwissProt":["A0A3B3ISD1_HUMAN"]},{"UniProt":"P11362","EnsemblGene":["ENSG00000077782"],"SwissProt":["FGFR1_HUMAN"]},{"UniProt":"A0A0S2Z3Q6","RefSeq":[["NM_001174063","NP_001167534","REVIEWED…		Distribution: Detected in all; Specificity: Low tissue specificity	General cytoplasmic, nuclear and membranous expression.; antibody: Most normal tissues showed moderate cytoplasmic and nuclear staining. Additional membranous positivity was observed in a few tissues. Respiratory epithelia, gallbladder, trophoblasts, fallopian tube, Purkinje cells, megakaryocytes and smooth muscle were strongly stained. Liver and lymphoid tissue were in general weakly stained.	Antibody: Most cancers showed moderate cytoplasmic and nuclear staining. Additional membranous positivity was observed in several cases. Several cases of lymphomas, gliomas, renal and gastric cancers were weakly stained or negative.
1	FGFR2	2263	BBDS|BEK|BFR-1|CD332|CEK3|CFD1|ECT1|JWS|K-SAM|KGFR|TK14|TK25	The protein encoded by this gene is a member of the fibroblast growth factor receptor family, where amino acid sequence is highly conserved between members and throughout evolution. FGFR family members differ from one another in their ligand affinities and tissue distribution. A full-length representative protein consists of an extracellular region, composed of three immunoglobulin-like domains, …	FGFR2 (Fibroblast Growth Factor Receptor 2) is a Protein Coding gene. Diseases associated with FGFR2 include Pfeiffer Syndrome and Crouzon Syndrome. Among its related pathways are RET signaling and Signaling by FGFR2 in disease. Gene Ontology (GO) annotations related to this gene include protein homodimerization activity and protein kinase activity. An important paralog of this gene is FGFR1.	Tyrosine-protein kinase that acts as cell-surface receptor for fibroblast growth factors and plays an essential role in the regulation of cell proliferation, differentiation, migration and apoptosis, and in the regulation of embryonic development. Required for normal embryonic patterning, trophoblast function, limb bud development, lung morphogenesis, osteogenesis and skin development. Plays an e…	7 4	2 7	27 44	22 31	fibroblast growth factor receptor 2	chr10:121598458-121478330	symbol	H. sapiens	protein-coding	The protein encoded by this gene is a member of the fibroblast growth factor receptor family, where amino acid sequence is highly conserved between members and throughout evolution. FGFR family members differ from one another in their ligand affinities and tissue distribution. A full-length representative protein consists of an extracellular region, composed of three immunoglobulin-like domains, …	GO:0035602 fibroblast growth factor receptor signaling pathway involved in negative regulation of apoptotic process in bone marrow;GO:0035603 fibroblast growth factor receptor signaling pathway involved in hemopoiesis;GO:0035604 fibroblast growth factor receptor signaling pathway involved in positive regulation of cell proliferation in bone marrow	[GO:0005575] cellular_component; [GO:0003674] molecular_function; [GO:0043167] ion binding; [GO:0008150] biological_process; [GO:0006464] cellular protein modification process; [GO:0016301] kinase activity; [GO:0007165] signal transduction; [GO:0008283] cell population proliferation; [GO:0005622] intracellular; [GO:0043226] organelle; [GO:0005634] nucleus; [GO:0005737] cytoplasm; [GO:0005886] pla…	GO:0060076 excitatory synapse;GO:0005938 cell cortex;GO:0062023 collagen-containing extracellular matrix	GO:0005007 fibroblast growth factor-activated receptor activity;GO:0017134 fibroblast growth factor binding;GO:0004714 transmembrane receptor protein tyrosine kinase activity	Tyr protein kinase family	CD markers; Predicted intracellular proteins; FDA approved drug targets:Small molecule drugs; Disease related genes; FDA approved drug targets:Biotech drugs; Cancer-related genes:Candidate cancer biomarkers; Cancer-related genes:Mutational cancer driver genes; Predicted secreted proteins; Enzymes; Kinases:Tyr protein kinases; ENZYME proteins:Transferases; RAS pathway related proteins; Cancer-rela…	[IPR000719] Protein kinase domain; [IPR001245] Serine-threonine/tyrosine-protein kinase, catalytic domain; [IPR003598] Immunoglobulin subtype 2; [IPR003599] Immunoglobulin subtype; [IPR007110] Immunoglobulin-like domain; [IPR008266] Tyrosine-protein kinase, active site; [IPR011009] Protein kinase-like domain superfamily; [IPR013098] Immunoglobulin I-set; [IPR013783] Immunoglobulin-like fold; [IPR…	Cell Junctions (reliability']); Additional: Nucleoplasm;Vesicles	yes	yes	yes	yes	yes		yes	MP:0005367 renal/urinary system phenotype; MP:0005370 liver/biliary system phenotype; MP:0005385 cardiovascular system phenotype; MP:0010768 mortality/aging; MP:0005369 muscle phenotype; MP:0005376 homeostasis/metabolism phenotype; MP:0005384 cellular phenotype; MP:0005378 growth/size/body region phenotype; MP:0005386 behavior/neurological phenotype; MP:0005381 digestive/alimentary phenotype; MP:…	[ORPHA:83] Antley-Bixler syndrome; [ORPHA:87] APERT SYNDROME; [ORPHA:207] Crouzon disease; [ORPHA:1555] Cutis gyrata-acanthosis nigricans-craniosynostosis syndrome; [ORPHA:313855] FGFR2-related bent bone dysplasia; [ORPHA:168624] Familial scaphocephaly syndrome McGillivray type; [ORPHA:1540] JACKSON-WEISS SYNDROME; [ORPHA:2363] LACRIMOAURICULODENTODIGITAL SYNDROME; [ORPHA:93258] Pfeiffer syndrome…	OMIM ID:176943 Fibroblast growth factor receptor 2	FGFR2 related craniosynostosis; Ectrodactyly; Levy-Hollister syndrome; Crouzon syndrome; Scaphocephaly, maxillary retrusion, and mental retardation; Pfeiffer syndrome; Antley-Bixler syndrome without genital anomalies or disordered steroidogenesis; Saethre-Chotzen syndrome; Beare-Stevenson cutis gyrata syndrome; Neoplasm of stomach; Acrocephalosyndactyly type I; Bent bone dysplasia syndrome; Jacks…	Anthropometry;Cholesterol, LDL;Dehydroepiandrosterone;Glomerular Filtration Rate;Hemoglobin A2	Adenocarcinoma of lung;Breast Neoplasms;Carcinoma, Endometrioid;Carcinoma, Non-Small-Cell Lung;Colorectal Neoplasms;Deglutition Disorders;Gout;HER2(776-788);Lung Neoplasms;Magnesium;Otitis;Ovarian Neoplasms;Prostate-Specific Antigen;Prostatic Neoplasms	[101600] ACROCEPHALOSYNDACTYLY TYPE V; [207410] Antley-Bixler syndrome; [101200] APERT SYNDROME; [123790] Beare-Stevenson Cutis Gyrata syndrome; [123500] CROUZON SYNDROME; [609579] FAMILIAL SCAPHOCEPHALY SYNDROME; [123150] JACKSON-WEISS SYNDROME; [149730] LACRIMO-AURICULO-DENTO-DIGITAL SYNDROME	Acrocephalosyndactyly type i: likely pathogenic,pathogenic; Adenocarcinoma of stomach: likely pathogenic,pathogenic,uncertain significance; Adenoid cystic carcinoma: likely pathogenic,uncertain significance; Antley-bixler syndrome without genital anomalies or disordered steroidogenesis: pathogenic; Bent bone dysplasia syndrome: likely pathogenic,pathogenic; Craniosynostosis, nonsyndromic unicoron…	HP:0003246:Prominent scrotal raphe; HP:0030042:Incomplete ossification of pubis; HP:0004450:Preauricular skin furrow; HP:0004487:Acrobrachycephaly; HP:0008111:Broad distal hallux; HP:0007343:Abnormal morphology of the limbic system; HP:0009603:Deviation of the thumb; HP:0011223:Metopic depression; HP:0004439:Craniofacial dysostosis; HP:0040166:Abnormality of the periosteum; HP:0009951:Partial dup…	Palifermin; Thalidomide; Heparin; Sucrosofate; 3-[4-(1-formylpiperazin-4-yl)-benzylidenyl]-2-indolinone; 4-[4-(1-Amino-1-Methylethyl)Phenyl]-5-Chloro-N-[4-(2-Morpholin-4-Ylethyl)Phenyl]Pyrimidin-2-Amine; Regorafenib; Ponatinib; Lenvatinib; Nintedanib; Foreskin fibroblast (neonatal); Foreskin keratinocyte (neonatal); Fostamatinib; Erdafitinib; Pemigatinib; Selpercatinib	Abnormal morphology of the limbic system; Abnormality of the periosteum; Abnormality of the zygomatic bone; Acrobrachycephaly; Bent bone dysplasia; Broad distal hallux; CRANIOSYNOSTOSIS, NONCLASSIFIABLE AUTOSOMAL DOMINANT; CRANIOSYNOSTOSIS, NONSYNDROMIC UNICORONAL; Cervical Keratinizing Squamous Cell Carcinoma; Cervical Mesonephric Adenocarcinoma; Deviation of the thumb; Estrogen Receptor Status …	469	617	[{"UniProt":"D2CGD1","EnsemblGene":["ENSG00000066468"],"EnsemblTrans":[["ENST00000613048","ENSP00000484154",""]],"RefSeq":[["NM_023029","NP_075418","REVIEWED"]],"UCSC":["uc057wkv.1"],"SwissProt":["D2CGD1_HUMAN"]},{"UniProt":"S4R381","EnsemblGene":["ENSG00000066468"],"EnsemblTrans":[["ENST00000478859","ENSP00000474011",""]],"RefSeq":[["NM_001320654","NP_001307583","REVIEWED"]],"UCSC":["uc057wkx.1"…		Distribution: Detected in many; Specificity: Tissue enhanced	antibody: Airway and squamous epithelia showed strong cytoplasm staining. Leydig cells of testis and glandular cells of epidydimis showed strong cytoplasmic positivity with a granular pattern. Prostate and salivary gland showed positivity in basal cells. Normal cells in general displayed weak to moderate cytoplasmic staining.; General cytoplasmic expression.	Antibody: Skin cancers as well as several cases of cervical, lung, urothelial and liver cancers displayed moderate to strong immunoreactivity. Remaining cancer tissues were in general negative.
1	FGFR3	2261	ACH|CD333|CEK2|HSFGFR3EX|JTK4	This gene encodes a member of the fibroblast growth factor receptor (FGFR) family, with its amino acid sequence being highly conserved between members and among divergent species. FGFR family members differ from one another in their ligand affinities and tissue distribution. A full-length representative protein would consist of an extracellular region, composed of three immunoglobulin-like domain…	FGFR3 (Fibroblast Growth Factor Receptor 3) is a Protein Coding gene. Diseases associated with FGFR3 include Achondroplasia and Hypochondroplasia. Among its related pathways are RET signaling and Signaling by GPCR. Gene Ontology (GO) annotations related to this gene include transferase activity, transferring phosphorus-containing groups and protein tyrosine kinase activity. An important paralog o…	Tyrosine-protein kinase that acts as cell-surface receptor for fibroblast growth factors and plays an essential role in the regulation of cell proliferation, differentiation and apoptosis. Plays an essential role in the regulation of chondrocyte differentiation, proliferation and apoptosis, and is required for normal skeleton development. Regulates both osteogenesis and postnatal bone mineralizat…	15 6	4 3	53 23	40 31	fibroblast growth factor receptor 3	chr4:1793293-1808872	symbol	H. sapiens	protein-coding	This gene encodes a member of the fibroblast growth factor receptor (FGFR) family, with its amino acid sequence being highly conserved between members and among divergent species. FGFR family members differ from one another in their ligand affinities and tissue distribution. A full-length representative protein would consist of an extracellular region, composed of three immunoglobulin-like domain…	GO:1902178 fibroblast growth factor receptor apoptotic signaling pathway;GO:0035988 chondrocyte proliferation;GO:0070977 bone maturation	[GO:0005575] cellular_component; [GO:0003674] molecular_function; [GO:0043167] ion binding; [GO:0008150] biological_process; [GO:0006464] cellular protein modification process; [GO:0016301] kinase activity; [GO:0007165] signal transduction; [GO:0008283] cell population proliferation; [GO:0005737] cytoplasm; [GO:0005622] intracellular; [GO:0043226] organelle; [GO:0005783] endoplasmic reticulum; [G…	GO:0030133 transport vesicle;GO:0005925 focal adhesion;GO:0005924 cell-substrate adherens junction	GO:0005007 fibroblast growth factor-activated receptor activity;GO:0017134 fibroblast growth factor binding;GO:0004714 transmembrane receptor protein tyrosine kinase activity	Tyr protein kinase family	CD markers; Predicted intracellular proteins; FDA approved drug targets:Small molecule drugs; Disease related genes; Cancer-related genes:Candidate cancer biomarkers; Cancer-related genes:Mutational cancer driver genes; Enzymes; Kinases:Tyr protein kinases; ENZYME proteins:Transferases; RAS pathway related proteins; Cancer-related genes:Mutated cancer genes	[IPR000719] Protein kinase domain; [IPR001245] Serine-threonine/tyrosine-protein kinase, catalytic domain; [IPR003598] Immunoglobulin subtype 2; [IPR003599] Immunoglobulin subtype; [IPR007110] Immunoglobulin-like domain; [IPR008266] Tyrosine-protein kinase, active site; [IPR011009] Protein kinase-like domain superfamily; [IPR013098] Immunoglobulin I-set; [IPR013783] Immunoglobulin-like fold; [IPR…	Endoplasmic reticulum (reliability'])	yes		yes	yes			yes	MP:0010768 mortality/aging; MP:0005384 cellular phenotype; MP:0005378 growth/size/body region phenotype; MP:0005386 behavior/neurological phenotype; MP:0005381 digestive/alimentary phenotype; MP:0005387 immune system phenotype; MP:0005389 reproductive system phenotype; MP:0003631 nervous system phenotype; MP:0005391 vision/eye phenotype; MP:0005377 hearing/vestibular/ear phenotype; MP:0005371 lim…	[ORPHA:15] Achondroplasia; [ORPHA:85164] Camptodactyly-tall stature-scoliosis-hearing loss syndrome; [ORPHA:93262] Crouzon syndrome-acanthosis nigricans syndrome; [ORPHA:251579] Giant cell glioblastoma; [ORPHA:251576] Gliosarcoma; [ORPHA:429] HYPOCHONDROPLASIA; [ORPHA:35099] Isolated brachycephaly; [ORPHA:35098] Isolated plagiocephaly; [ORPHA:2363] LACRIMOAURICULODENTODIGITAL SYNDROME; [ORPHA:532…	OMIM ID:134934 Fibroblast growth factor receptor 3	Craniosynostosis; Camptodactyly-tall stature-scoliosis-hearing loss syndrome; Levy-Hollister syndrome; Acanthosis nigricans; Carcinoma; Bladder carcinoma; Hypochondroplasia; FGFR3-related disorder; Carcinoma of colon; Achondroplasia; Thanatophoric dysplasia type 1; Crouzon syndrome with acanthosis nigricans; Carcinoma of cervix; Urinary bladder cancer; Severe achondroplasia with developmental del…	Platelet Function Tests		[100800] Achondroplasia; [610474] CAMPTODACTYLY TALL STATURE AND HEARING LOSS SYNDROME; [612247] CROUZON SYNDROME WITH ACANTHOSIS NIGRICANS; [146000] HYPOCHONDROPLASIA; [149730] LACRIMO-AURICULO-DENTO-DIGITAL SYNDROME; [602849] MUENKE SYNDROME; [187600] Thanatophoric dysplasia type 1; [187601] THANATOPHORIC DYSPLASIA TYPE 2	Acanthosis nigricans: likely pathogenic,pathogenic; Achondroplasia: likely pathogenic,pathogenic; Bladder cancer, somatic: likely pathogenic,pathogenic; Camptodactyly, tall stature, and hearing loss syndrome: pathogenic; Crouzon syndrome: not provided,pathogenic,uncertain significance; Crouzon syndrome with acanthosis nigricans: likely pathogenic,pathogenic; Carcinoma: likely pathogenic,pathogeni…	HP:0000910:Wide-cupped costochondral junctions; HP:0006193:Thimble-shaped middle phalanges of hand; HP:0008414:Lumbar kyphosis in infancy; HP:0005733:Spinal stenosis with reduced interpedicular distance; HP:0008909:Lethal short-limbed short stature; HP:0006417:Broad femoral metaphyses; HP:0004060:Trident hand; HP:0100491:Abnormality of lower limb joint; HP:0006584:Small abnormally formed scapulae…	Palifermin; XL999; Pazopanib; Ponatinib; Lenvatinib; Nintedanib; Fostamatinib; Erdafitinib; Pemigatinib; Selpercatinib	Abnormality of lower limb joint; Achondroplastic dwarfism; Bicoronal craniosynostosis; Brain Development Abnormality; Broad femoral metaphyses; CATSHL syndrome; CROUZON SYNDROME WITH ACANTHOSIS NIGRICANS (disorder); Familial acanthosis nigricans; Lethal short-limbed short stature; Lumbar kyphosis in infancy; Osteochondropathy; SEVERE ACHONDRODYSPLASIA WITH DEVELOPMENTAL DELAY AND ACANTHOSIS NIGRI…	393	529	[{"UniProt":"P22607","EnsemblGene":["ENSG00000068078"],"SwissProt":["FGFR3_HUMAN"]},{"UniProt":"Q0IJ44","RefSeq":[["NM_000142","NP_000133","REVIEWED"],["NM_001163213","NP_001156685","REVIEWED"],["NM_022965","NP_075254","REVIEWED"]],"SwissProt":["Q0IJ44_HUMAN"]}]		Distribution: Detected in many; Specificity: Tissue enriched	antibody: Squamous epithelia, basal cells in testis and few neuronal cells in CNS showed moderate to strong cytoplasmic positivity. Remaining normal cells were weakly stained or negative.; Cytoplasmic expression in squamous epithelia, CNS and testis.	Antibody: Skin, testis and urothelial cancers showed cases of moderate to strong cytoplasmic positivity. Remaining malignancies were mainly weakly stained or negative.
1	FGFR4	2264	CD334|JTK2|TKF	The protein encoded by this gene is a tyrosine kinase and cell surface receptor for fibroblast growth factors. The encoded protein is involved in the regulation of several pathways, including cell proliferation, cell differentiation, cell migration, lipid metabolism, bile acid biosynthesis, vitamin D metabolism, glucose uptake, and phosphate homeostasis. This protein consists of an extracellular …	FGFR4 (Fibroblast Growth Factor Receptor 4) is a Protein Coding gene. Diseases associated with FGFR4 include Prostate Cancer and Neuroendocrine Carcinoma. Among its related pathways are RET signaling and Signaling by GPCR. Gene Ontology (GO) annotations related to this gene include transferase activity, transferring phosphorus-containing groups and protein tyrosine kinase activity. An important p…	Tyrosine-protein kinase that acts as cell-surface receptor for fibroblast growth factors and plays a role in the regulation of cell proliferation, differentiation and migration, and in regulation of lipid metabolism, bile acid biosynthesis, glucose uptake, vitamin D metabolism and phosphate homeostasis. Required for normal down-regulation of the expression of CYP7A1, the rate-limiting enzyme in b…	9 3	11 5	49 34	51 37	fibroblast growth factor receptor 4	chr5:177086915-177098144	symbol	H. sapiens	protein-coding	The protein encoded by this gene is a tyrosine kinase and cell surface receptor for fibroblast growth factors. The encoded protein is involved in the regulation of several pathways, including cell proliferation, cell differentiation, cell migration, lipid metabolism, bile acid biosynthesis, vitamin D metabolism, glucose uptake, and phosphate homeostasis. This protein consists of an extracellular …	GO:1903412 response to bile acid;GO:0070857 regulation of bile acid biosynthetic process;GO:0055062 phosphate ion homeostasis	[GO:0005575] cellular_component; [GO:0003674] molecular_function; [GO:0043167] ion binding; [GO:0008150] biological_process; [GO:0006464] cellular protein modification process; [GO:0016301] kinase activity; [GO:0007165] signal transduction; [GO:0008283] cell population proliferation; [GO:0005737] cytoplasm; [GO:0005622] intracellular; [GO:0043226] organelle; [GO:0005783] endoplasmic reticulum; [G…	GO:0005911 cell-cell junction;GO:0030133 transport vesicle;GO:0043235 receptor complex	GO:0005007 fibroblast growth factor-activated receptor activity;GO:0017134 fibroblast growth factor binding;GO:0004714 transmembrane receptor protein tyrosine kinase activity	Tyr protein kinase family	CD markers; Predicted intracellular proteins; FDA approved drug targets:Small molecule drugs; Transporters:Accessory Factors Involved in Transport; Disease related genes; Cancer-related genes:Candidate cancer biomarkers; Enzymes; Kinases:Tyr protein kinases; ENZYME proteins:Transferases; RAS pathway related proteins	[IPR000719] Protein kinase domain; [IPR001245] Serine-threonine/tyrosine-protein kinase, catalytic domain; [IPR003598] Immunoglobulin subtype 2; [IPR003599] Immunoglobulin subtype; [IPR007110] Immunoglobulin-like domain; [IPR008266] Tyrosine-protein kinase, active site; [IPR011009] Protein kinase-like domain superfamily; [IPR013098] Immunoglobulin I-set; [IPR013783] Immunoglobulin-like fold; [IPR…		yes		yes	yes	yes		yes	MP:0005384 cellular phenotype; MP:0005378 growth/size/body region phenotype; MP:0005387 immune system phenotype; MP:0005390 skeleton phenotype; MP:0005397 hematopoietic system phenotype		OMIM ID:134935 Fibroblast growth factor receptor 4	Neoplasm of the breast; Rhabdomyosarcoma (disease)		Body Height;Body Mass Index;Crown-Rump Length;Thinness;Uric Acid;Waist Circumference;Waist-Hip Ratio		Cancer progression and tumor cell motility: pathogenic; Neoplasm of the breast: likely pathogenic; Rhabdomyosarcoma: likely pathogenic; Waist-to-hip ratio adjusted for body mass index: pathogenic		Palifermin; Heparin; Ponatinib; Lenvatinib; Erdafitinib; Pemigatinib	CANCER PROGRESSION AND TUMOR CELL MOTILITY; Hepatoma resectable; stage, esophageal cancer; Childhood Gliomatosis Cerebri; Gliomatosis cerebri; Hyperphosphaturia; Sotos' syndrome; Bone Sarcoma; Node-positive breast cancer; Breast cancer recurrent; Perihilar Cholangiocarcinoma; Chromosome 5, trisomy 5q; Mandibulofacial Dysostosis; Phosphate Diabetes; Situs ambiguus; von Willebrand's factor (lab tes…	157	228	[{"UniProt":"J3KPQ0","EnsemblGene":["ENSG00000160867"],"EnsemblTrans":[["ENST00000393648","ENSP00000377259",""]],"RefSeq":[["NM_001291980","NP_001278909","REVIEWED"]],"UCSC":["uc011dfu.3"],"SwissProt":["J3KPQ0_HUMAN"]},{"UniProt":"P22455","EnsemblGene":["ENSG00000160867"],"RefSeq":[["NM_001291980","NP_001278909","REVIEWED"],["XM_005265838","XP_005265895"]],"SwissProt":["FGFR4_HUMAN"]},{"UniProt":…	muscle	Distribution: Detected in many; Specificity: Tissue enhanced	Cytoplasmic expression in several tissues.; antibody: Most normal tissues showed weak to moderate cytoplasmic positivity, in several cases combined with membranous stained. Prostate glands and leydig cells were strongly stained.	Antibody: Prostate cancers along with several gliomas, gastric and pancreatic cancers showed strong cytoplasmic positivity. Several colorectal, breast, urothelial, gastric, pancreatic and liver cancers were moderately stained. Remaining cancer tissues were weakly stained or negative.
1	FH	2271	FMRD|HLRCC|HsFH|LRCC|MCL|MCUL1	The protein encoded by this gene is an enzymatic component of the tricarboxylic acid (TCA) cycle, or Krebs cycle, and catalyzes the formation of L-malate from fumarate. It exists in both a cytosolic form and an N-terminal extended form, differing only in the translation start site used. The N-terminal extended form is targeted to the mitochondrion, where the removal of the extension generates the…	FH (Fumarate Hydratase) is a Protein Coding gene. Diseases associated with FH include Fumarase Deficiency and Hereditary Leiomyomatosis And Renal Cell Cancer. Among its related pathways are Citrate cycle (TCA cycle) and ErbB signaling pathway. Gene Ontology (GO) annotations related to this gene include lyase activity and fumarate hydratase activity. An important paralog of this gene is ASL.	Catalyzes the reversible stereospecific interconversion of fumarate to L-malate (PubMed:30761759). Experiments in other species have demonstrated that specific isoforms of this protein act in defined pathways and favor one direction over the other (Probable). FUMH_HUMAN,P07954 [Isoform Mitochondrial]: Catalyzes the hydration of fumarate to L-malate in the tricarboxylic acid (TCA) cycle to facilit…	83 93	72 68	58 68	80 94	fumarate hydratase	chr1:241519755-241497603	symbol	H. sapiens	protein-coding	The protein encoded by this gene is an enzymatic component of the tricarboxylic acid (TCA) cycle, or Krebs cycle, and catalyzes the formation of L-malate from fumarate. It exists in both a cytosolic form and an N-terminal extended form, differing only in the translation start site used. The N-terminal extended form is targeted to the mitochondrion, where the removal of the extension generates the…	GO:0006106 fumarate metabolic process;GO:0006108 malate metabolic process;GO:0048873 homeostasis of number of cells within a tissue	[GO:0003674] molecular_function; [GO:0016829] lyase activity; [GO:0008150] biological_process; [GO:0006091] generation of precursor metabolites and energy; [GO:0044281] small molecule metabolic process; [GO:0005575] cellular_component; [GO:0005737] cytoplasm; [GO:0005622] intracellular; [GO:0032991] protein-containing complex; [GO:0043226] organelle; [GO:0005634] nucleus; [GO:0005739] mitochondri…	GO:0045239 tricarboxylic acid cycle enzyme complex;GO:0005759 mitochondrial matrix;GO:0044429 mitochondrial part	GO:0004333 fumarate hydratase activity;GO:0016836 hydro-lyase activity;GO:0016835 carbon-oxygen lyase activity		Predicted intracellular proteins; Disease related genes; ENZYME proteins:Lyases; Cancer-related genes; Enzymes; Potential drug targets; Citric acid cycle related proteins	[IPR000362] Fumarate lyase family; [IPR005677] Fumarate hydratase, class II; [IPR008948] L-Aspartase-like; [IPR018951] Fumarase C, C-terminal; [IPR020557] Fumarate lyase, conserved site; [IPR022761] Fumarate lyase, N-terminal; [IPR024083] Fumarase/histidase, N-terminal	Mitochondria (reliability'])					yes			MP:0005367 renal/urinary system phenotype; MP:0010768 mortality/aging; MP:0005376 homeostasis/metabolism phenotype; MP:0005384 cellular phenotype; MP:0005378 growth/size/body region phenotype	[ORPHA:24] Fumaric aciduria; [ORPHA:523] HEREDITARY LEIOMYOMATOSIS AND RENAL CELL CANCER; [ORPHA:29072] Hereditary pheochromocytoma-paraganglioma	OMIM ID:136850 Fumarate hydratase	Fumarase deficiency; Hereditary leiomyomatosis and renal cell cancer; Hereditary cancer-predisposing syndrome; Cutaneous leiomyoma; Uterine leiomyoma	Creatinine;Erythrocyte Count;Heart Failure;oxidized low density lipoprotein		[606812] FUMARASE DEFICIENCY		HP:0006732:Papillary renal cell carcinoma type 2; HP:0007437:Multiple cutaneous leiomyomas; HP:0003536:Decreased fumarate hydratase activity; HP:0007620:Cutaneous leiomyoma; HP:0006755:Cutaneous leiomyosarcoma; HP:0100954:Open operculum; HP:0000131:Uterine leiomyoma; HP:0002190:Choroid plexus cyst; HP:0100580:Barrett esophagus; HP:0100650:Vaginal neoplasm; HP:0001901:Polycythemia; HP:0010532:Paro…		Cutaneous Leiomyosarcoma; Cutaneous leiomyoma; Cutaneous leiomyosarcoma (less common); Decreased fumarate hydratase activity; Reed syndrome; Renal cell carcinoma, solitary papillary type 2 (about 20% of patients); Uterine leiomyosarcoma (less common); Fumaric aciduria; Mucinous cystadenoma of ovary; Bizarre leiomyoma; Open operculum; Fumarase deficiency; Hereditary Papillary Renal Carcinoma; Non-…	87	132	[{"UniProt":"P07954","EnsemblGene":["ENSG00000091483"],"SwissProt":["FUMH_HUMAN"]},{"UniProt":"A0A0S2Z4C3","RefSeq":[["NM_000143","NP_000134","REVIEWED"]],"SwissProt":["A0A0S2Z4C3_HUMAN"]}]		Distribution: Detected in all; Specificity: Tissue enhanced	antibody: Normal tissues generally displayed moderate to strong cytoplasmic immunoreactivity with a granular pattern. ; Ubiquitous granular cytoplasmic expression.	Antibody: Most malignant cells showed moderate to strong cytoplasmic immunoreactivity with a granular pattern.
1	FHIT	2272	AP3Aase|FRA3B	The protein encoded by this gene is a P1-P3-bis(5'-adenosyl) triphosphate hydrolase involved in purine metabolism. This gene encompasses the common fragile site FRA3B on chromosome 3, where carcinogen-induced damage can lead to translocations and aberrant transcripts. In fact, aberrant transcripts from this gene have been found in about half of all esophageal, stomach, and colon carcinomas. The e…	FHIT (Fragile Histidine Triad Diadenosine Triphosphatase) is a Protein Coding gene. Diseases associated with FHIT include Renal Cell Carcinoma, Nonpapillary and Sporadic Breast Cancer. Among its related pathways are Small cell lung cancer and Metabolism. Gene Ontology (GO) annotations related to this gene include identical protein binding and hydrolase activity. An important paralog of this gene …	Cleaves P(1)-P(3)-bis(5'-adenosyl) triphosphate (Ap3A) to yield AMP and ADP. Can also hydrolyze P(1)-P(4)-bis(5'-adenosyl) tetraphosphate (Ap4A), but has extremely low activity with ATP. Modulates transcriptional activation by CTNNB1 and thereby contributes to regulate the expression of genes essential for cell proliferation and survival, such as CCND1 and BIRC5. Plays a role in the induction of …	12 27	6 24	19 34	9 29	fragile histidine triad diadenosine triphosphatase	chr3:61251452-59747277	symbol	H. sapiens	protein-coding	The protein encoded by this gene is a P1-P3-bis(5'-adenosyl) triphosphate hydrolase involved in purine metabolism. This gene encompasses the common fragile site FRA3B on chromosome 3, where carcinogen-induced damage can lead to translocations and aberrant transcripts. In fact, aberrant transcripts from this gene have been found in about half of all esophageal, stomach, and colon carcinomas. The e…	GO:0015962 diadenosine triphosphate metabolic process;GO:0015964 diadenosine triphosphate catabolic process;GO:0015961 diadenosine polyphosphate catabolic process	[GO:0003674] molecular_function; [GO:0005575] cellular_component; [GO:0005622] intracellular; [GO:0043226] organelle; [GO:0005634] nucleus; [GO:0005737] cytoplasm; [GO:0005886] plasma membrane; [GO:0005730] nucleolus; [GO:0008150] biological_process; [GO:0008219] cell death; [GO:0005739] mitochondrion; [GO:0005829] cytosol; [GO:0034641] cellular nitrogen compound metabolic process; [GO:0044281] s…	GO:0001650 fibrillar center;GO:0044452 nucleolar part;GO:0005730 nucleolus	GO:0047710 bis(5'-adenosyl)-triphosphatase activity;GO:0004551 nucleotide diphosphatase activity;GO:0031625 ubiquitin protein ligase binding		Predicted intracellular proteins; Disease related genes; ENZYME proteins:Hydrolases; Cancer-related genes:Candidate cancer biomarkers; Enzymes; Potential drug targets	[IPR001310] Histidine triad (HIT) protein; [IPR011146] HIT-like domain; [IPR019808] Histidine triad, conserved site; [IPR036265] HIT-like superfamily; [IPR039383] FHIT family	Nucleoli fibrillar center;Plasma membrane (reliability'])						principal1		MP:0005370 liver/biliary system phenotype; MP:0010768 mortality/aging; MP:0005376 homeostasis/metabolism phenotype; MP:0005381 digestive/alimentary phenotype; MP:0005387 immune system phenotype; MP:0002006 neoplasm; MP:0005397 hematopoietic system phenotype; MP:0010771 integument phenotype	[ORPHA:422526] Hereditary clear cell renal cell carcinoma	OMIM ID:601153 Fragile histidine triad gene		Albumins;Alcoholism;Altruism;Alzheimer Disease;Blood Pressure;Body Weight;Body Weights and Measures;Cardiovascular Physiological Phenomena;Child Development Disorders, Pervasive;Cholesterol;Cholesterol, LDL;Coronary Artery Disease;Creatinine;Dehydroepiandrosterone;Electrocardiography;Erythrocyte Count;Fetal Hemoglobin;Fibrinogen;Folic Acid;Glomerular Filtration Rate;Heart Diseases;Heart Failure;H…	Anticonvulsants;Antidepressive Agents;Antineoplastic Agents;Aorta;Asperger Syndrome;Attention Deficit Disorder with Hyperactivity;Autosomal dominant compelling helio ophthalmic outburst syndrome;Body Mass Index;Breast;Breast Neoplasms;Bronchodilator Agents;Bronchopulmonary Dysplasia;Cognition;Conotruncal cardiac defects;Dental Caries;Depressive Disorder;Drug Resistance;Forced Expiratory Volume;Ge…				Adenosine monotungstate; Ado-P-Ch2-P-Ps-Ado	Malignant neoplasm of thorax; Maximal Voluntary Ventilation; tuberculosis chronic pulmonary; Anaplastic sarcoma; Fibroadenosis; Erythroplasia; Pleomorphic adenoma of parotid gland; Anus Neoplasms; Hereditary Renal Cell Carcinoma; Hereditary clear cell renal cell carcinoma; Torre-Muir syndrome; Familial renal cell carcinoma; Megaesophagus; Microinvasive carcinoma; Atrophic endometrium; Microinvasi…	263	340	[{"UniProt":"P49789","EnsemblGene":["ENSG00000189283"],"EnsemblTrans":[["ENST00000468189","ENSP00000417480","principal1"],["ENST00000476844","ENSP00000417557","principal1"],["ENST00000492590","ENSP00000418582","principal1"]],"RefSeq":[["NM_001166243","NP_001159715","REVIEWED"],["NM_001320899","NP_001307828","REVIEWED"],["NM_001320900","NP_001307829","REVIEWED"],["NM_002012","NP_002003","REVIEWED"…		Distribution: Detected in all; Specificity: Low tissue specificity	antibody: Most normal cells showed moderate to strong cytoplasmic positivity. Squamous epithelium and myocytes were mainly negative.; General cytoplasmic expression.	Antibody: Most cancers showed moderate to strong cytoplasmic positivity. Lymphomas and skin cancer were mainly negative.
1	FLT3	2322	CD135|FLK-2|FLK2|STK1	This gene encodes a class III receptor tyrosine kinase that regulates hematopoiesis. This receptor is activated by binding of the fms-related tyrosine kinase 3 ligand to the extracellular domain, which induces homodimer formation in the plasma membrane leading to autophosphorylation of the receptor. The activated receptor kinase subsequently phosphorylates and activates multiple cytoplasmic effec…	FLT3 (Fms Related Receptor Tyrosine Kinase 3) is a Protein Coding gene. Diseases associated with FLT3 include Leukemia, Acute Myeloid and Acute Myeloblastic Leukemia Without Maturation. Among its related pathways are Transcriptional misregulation in cancer and Activation of cAMP-Dependent PKA. Gene Ontology (GO) annotations related to this gene include protein homodimerization activity and protei…	Tyrosine-protein kinase that acts as cell-surface receptor for the cytokine FLT3LG and regulates differentiation, proliferation and survival of hematopoietic progenitor cells and of dendritic cells. Promotes phosphorylation of SHC1 and AKT1, and activation of the downstream effector MTOR. Promotes activation of RAS signaling and phosphorylation of downstream kinases, including MAPK1/ERK2 and/or M…	3 4	2	5 7	3 3	fms related receptor tyrosine kinase 3	chr13:28100587-28003274	symbol	H. sapiens	protein-coding	This gene encodes a class III receptor tyrosine kinase that regulates hematopoiesis. This receptor is activated by binding of the fms-related tyrosine kinase 3 ligand to the extracellular domain, which induces homodimer formation in the plasma membrane leading to autophosphorylation of the receptor. The activated receptor kinase subsequently phosphorylates and activates multiple cytoplasmic effec…	GO:0002318 myeloid progenitor cell differentiation;GO:0035726 common myeloid progenitor cell proliferation;GO:0002328 pro-B cell differentiation	[GO:0003674] molecular_function; [GO:0043167] ion binding; [GO:0008150] biological_process; [GO:0006464] cellular protein modification process; [GO:0016301] kinase activity; [GO:0007165] signal transduction; [GO:0030154] cell differentiation; [GO:0048856] anatomical structure development; [GO:0002376] immune system process; [GO:0005575] cellular_component; [GO:0005737] cytoplasm; [GO:0005622] int…	GO:0005788 endoplasmic reticulum lumen;GO:0043235 receptor complex;GO:0044432 endoplasmic reticulum part	GO:0005021 vascular endothelial growth factor-activated receptor activity;GO:0035259 glucocorticoid receptor binding;GO:0043621 protein self-association	Tyr protein kinase family	CD markers; FDA approved drug targets:Small molecule drugs; Disease related genes; Cancer-related genes:Mutational cancer driver genes; Enzymes; Kinases:Tyr protein kinases; ENZYME proteins:Transferases; RAS pathway related proteins; Cancer-related genes:Mutated cancer genes	[IPR000719] Protein kinase domain; [IPR001245] Serine-threonine/tyrosine-protein kinase, catalytic domain; [IPR001824] Tyrosine-protein kinase, receptor class III, conserved site; [IPR007110] Immunoglobulin-like domain; [IPR008266] Tyrosine-protein kinase, active site; [IPR011009] Protein kinase-like domain superfamily; [IPR013151] Immunoglobulin; [IPR013783] Immunoglobulin-like fold; [IPR017441]…	Endoplasmic reticulum (reliability'])			yes	yes			yes	MP:0010768 mortality/aging; MP:0005376 homeostasis/metabolism phenotype; MP:0005384 cellular phenotype; MP:0005378 growth/size/body region phenotype; MP:0005387 immune system phenotype; MP:0002006 neoplasm; MP:0005390 skeleton phenotype; MP:0005397 hematopoietic system phenotype	[ORPHA:98834] Acute myeloblastic leukemia with maturation; [ORPHA:98833] Acute myeloblastic leukemia without maturation; [ORPHA:98829] Acute myeloid leukemia with abnormal bone marrow eosinophils inv16p13q22 or t16; [ORPHA:98832] Acute myeloid leukemia with minimal differentiation; [ORPHA:102724] Acute myeloid leukemia with t8; [ORPHA:530995] Mixed phenotype acute leukemia; [ORPHA:99860] Precurso…	OMIM ID:136351 Fms-related tyrosine kinase 3	Multiple myeloma; Acute myeloid leukemia; Acute lymphoid leukemia	Platelet Function Tests	Body Mass Index;Monocytes		Acute lymphoid leukemia: pathogenic; Acute myeloid leukemia: likely pathogenic,pathogenic; Myelodysplastic syndrome progressed to acute myeloid leukemia: pathogenic; Sunitinib response - toxicity/adr: drug response	HP:0006721:Acute lymphoblastic leukemia; HP:0010982:Polygenic inheritance; HP:0004808:Acute myeloid leukemia; HP:0001428:Somatic mutation; HP:0000006:Autosomal dominant inheritance	Sorafenib; Sunitinib; XL999; Tandutinib; ABT-869; Lestaurtinib; Midostaurin; Ponatinib; Nintedanib; Fostamatinib; Gilteritinib; Brigatinib; Fedratinib; Amuvatinib; Quizartinib; Pexidartinib	Chronic myeloid leukemia in lymphoid blast crisis; Acute myeloid leukemia with mutated CEBPA; Enterocolitis, Neutropenic; Mast cell malignancy; Wound sepsis; Adult Acute Myeloid Leukemia without Maturation; Neonatal leukaemia; Adult Acute Promyelocytic Leukemia with PML-RARA; MDS transformation; Myeloid/Lymphoid Neoplasms with Eosinophilia and Rearrangement of PDGFRA, PDGFRB, or FGFR1, or with PC…	624	696	[{"UniProt":"P36888","EnsemblGene":["ENSG00000122025"],"SwissProt":["FLT3_HUMAN"]}]	bone_marrow	Distribution: Detected in many; Specificity: Tissue enhanced
1	FOXA1	3169	HNF3A|TCF3A	This gene encodes a member of the forkhead class of DNA-binding proteins. These hepatocyte nuclear factors are transcriptional activators for liver-specific transcripts such as albumin and transthyretin, and they also interact with chromatin. Similar family members in mice have roles in the regulation of metabolism and in the differentiation of the pancreas and liver. [provided by RefSeq, Jul 200…	FOXA1 (Forkhead Box A1) is a Protein Coding gene. Diseases associated with FOXA1 include Estrogen-Receptor Negative Breast Cancer and Estrogen-Receptor Positive Breast Cancer. Among its related pathways are FOXA1 transcription factor network and FOXA2 and FOXA3 transcription factor networks. Gene Ontology (GO) annotations related to this gene include DNA-binding transcription factor activity and …	Transcription factor that is involved in embryonic development, establishment of tissue-specific gene expression and regulation of gene expression in differentiated tissues. Is thought to act as a 'pioneer' factor opening the compacted chromatin for other proteins through interactions with nucleosomal core histones and thereby replacing linker histones at target enhancer and/or promoter sites. Bi…	0.91	0.76	2 8	32 47	forkhead box A1	chr14:37595249-37589552	symbol	H. sapiens	protein-coding	This gene encodes a member of the forkhead class of DNA-binding proteins. These hepatocyte nuclear factors are transcriptional activators for liver-specific transcripts such as albumin and transthyretin, and they also interact with chromatin. Similar family members in mice have roles in the regulation of metabolism and in the differentiation of the pancreas and liver. [provided by RefSeq, Jul 200…	GO:0061144 alveolar secondary septum development;GO:1902691 respiratory basal cell differentiation;GO:0060738 epithelial-mesenchymal signaling involved in prostate gland development	[GO:0008150] biological_process; [GO:0034641] cellular nitrogen compound metabolic process; [GO:0009058] biosynthetic process; [GO:0003674] molecular_function; [GO:0003700] DNA-binding transcription factor activity; [GO:0003677] DNA binding; [GO:0008134] transcription factor binding; [GO:0030154] cell differentiation; [GO:0048856] anatomical structure development; [GO:0005575] cellular_component;…	GO:0005902 microvillus;GO:0001650 fibrillar center;GO:0044452 nucleolar part	GO:0001228 DNA-binding transcription activator activity, RNA polymerase II-specific;GO:0003682 chromatin binding;GO:0008134 transcription factor binding		Transcription factors:Helix-turn-helix domains; Cancer-related genes:Mutational cancer driver genes; Predicted intracellular proteins; Cancer-related genes:Mutated cancer genes	[IPR001766] Fork head domain; [IPR013638] Fork-head N-terminal; [IPR018122] Fork head domain conserved site1; [IPR018533] Forkhead box protein, C-terminal; [IPR030456] Fork head domain conserved site 2; [IPR036388] Winged helix-like DNA-binding domain superfamily; [IPR036390] Winged helix DNA-binding domain superfamily	Nucleoplasm (reliability']); Additional: Nucleoli fibrillar center								MP:0010768 mortality/aging; MP:0005376 homeostasis/metabolism phenotype; MP:0005378 growth/size/body region phenotype; MP:0005379 endocrine/exocrine gland phenotype; MP:0010771 integument phenotype		OMIM ID:602294 Forkhead box a1		Platelet Function Tests	Face;Hypersensitivity;Periodontitis;Tonsillectomy					Secondary malignant neoplasm of pleura; Supernumerary structure; Keratoconus posticus circumscriptus; Paget's Disease, Mammary; Adenosquamous cell lung cancer; Bone Marrow Suppression; Obstructive Ureterocele; Papillary serous cystadenocarcinoma; Micropapillary carcinoma; cervical cancer metastasis; Neoplasm of uncertain or unknown behavior of breast; Invasive Prostate Carcinoma; Prostate cancer …	210	247	[{"UniProt":"P55317","EnsemblGene":["ENSG00000129514"],"SwissProt":["FOXA1_HUMAN"]}]	prostate	Distribution: Detected in many; Specificity: Tissue enhanced	antibody: Respiratory epithelial cells and glandular cells in prostate showed moderate nuclear positivity. Renal tubules exhibited moderate cytoplasmic staining. Strong luminal membranous positivity was observed in small intestinal glands. Other normal tissues were negative.; Nuclear expression in prostate, urothelium, gastrointestinal tract, breast and respiratory epithelia.	Antibody: Several prostate and breast cancers showed weak to moderate nuclear positivity. Other cancer tissues were negative.
1	FOXO1	2308	FKH1|FKHR|FOXO1A	This gene encodes a member of the forkhead class of DNA-binding proteins. These hepatocyte nuclear factors are transcriptional activators for liver-specific genes such as albumin and transthyretin, and they also interact with chromatin. Similar family members in mice have roles in the regulation of metabolism and in the differentiation of the pancreas and liver. This gene has been linked to spora…	FOXA2 (Forkhead Box A2) is a Protein Coding gene. Diseases associated with FOXA2 include Combined Pituitary Hormone Deficiencies, Genetic Forms and Maturity-Onset Diabetes Of The Young. Among its related pathways are Regulation of beta-cell development and Hepatic ABC Transporters. Gene Ontology (GO) annotations related to this gene include DNA-binding transcription factor activity and transcript…	Transcription factor that is involved in embryonic development, establishment of tissue-specific gene expression and regulation of gene expression in differentiated tissues. Is thought to act as a 'pioneer' factor opening the compacted chromatin for other proteins through interactions with nucleosomal core histones and thereby replacing linker histones at target enhancer and/or promoter sites. Bi…	0.64	1	2 3	37 38	forkhead box O1	chr13:40666641-40555667	symbol	H. sapiens	protein-coding	This gene belongs to the forkhead family of transcription factors which are characterized by a distinct forkhead domain. The specific function of this gene has not yet been determined; however, it may play a role in myogenic growth and differentiation. Translocation of this gene with PAX3 has been associated with alveolar rhabdomyosarcoma. [provided by RefSeq, Jul 2008]	GO:1902617 response to fluoride;GO:0071455 cellular response to hyperoxia;GO:0010616 negative regulation of cardiac muscle adaptation	[GO:0008150] biological_process; [GO:0034641] cellular nitrogen compound metabolic process; [GO:0009058] biosynthetic process; [GO:0003674] molecular_function; [GO:0003700] DNA-binding transcription factor activity; [GO:0003677] DNA binding; [GO:0005575] cellular_component; [GO:0005622] intracellular; [GO:0043226] organelle; [GO:0005634] nucleus; [GO:0005737] cytoplasm; [GO:0008219] cell death; […	GO:0000790 nuclear chromatin;GO:0000785 chromatin;GO:0044454 nuclear chromosome part	GO:0001223 transcription coactivator binding;GO:0051721 protein phosphatase 2A binding;GO:0001221 transcription cofactor binding		Transcription factors:Helix-turn-helix domains; Cancer-related genes:Candidate cancer biomarkers; Disease related genes; Predicted intracellular proteins	[IPR001766] Fork head domain; [IPR032067] FOXO protein, transactivation domain; [IPR032068] FOXO protein, KIX-binding domain; [IPR036388] Winged helix-like DNA-binding domain superfamily; [IPR036390] Winged helix DNA-binding domain superfamily	Cytosol;Nucleoplasm (reliability'])						principal1		MP:0005370 liver/biliary system phenotype; MP:0005385 cardiovascular system phenotype; MP:0010768 mortality/aging; MP:0005369 muscle phenotype; MP:0005376 homeostasis/metabolism phenotype; MP:0005384 cellular phenotype; MP:0005378 growth/size/body region phenotype; MP:0005386 behavior/neurological phenotype; MP:0005381 digestive/alimentary phenotype; MP:0005387 immune system phenotype; MP:0002006…	[ORPHA:99756] Alveolar rhabdomyosarcoma	OMIM ID:136533 Forkhead box o1a		Platelet Function Tests	Corneal Pachymetry;Corneal Topography			HP:0006779:Alveolar rhabdomyosarcoma; HP:0001428:Somatic mutation; HP:0000007:Autosomal recessive inheritance		Fusion-Negative Alveolar Rhabdomyosarcoma; Angiomyofibroblastoma; Cellular angiofibroma; Skeletal Muscle Neoplasm; Trisomy 13 Syndrome; Fusion-Negative Rhabdomyosarcoma; Endometrioid intraepithelial neoplasia; Fusion-Positive Rhabdomyosarcoma; Hemangioma, Intramuscular; Myofibroblastoma; Chromosome 15q, trisomy; Spindle cell lipoma; T-CELL IMMUNODEFICIENCY, RECURRENT INFECTIONS, AND AUTOIMMUNITY …	562	625	[{"UniProt":"Q12778","EnsemblGene":["ENSG00000150907"],"EnsemblTrans":[["ENST00000379561","ENSP00000368880","principal1"]],"RefSeq":[["NM_002015","NP_002006","REVIEWED"]],"UCSC":["uc001uxl.5"],"SwissProt":["FOXO1_HUMAN"]}]		Distribution: Detected in all; Specificity: Tissue enhanced	antibody: Lymphoid organs and decidual cells showed moderate nuclear positivity. Purkinje cells, epididymis and seminal vesicle showed moderate cytoplasmic immunoreactivity. Remaining normal cells were weakly stained or negative.; Cytoplasmic and nuclear expression at variable levels in several different cell types.	Antibody: Rare cases of testis, urothelial and head and neck cancers showed moderate nuclear positivity. Most remaining cancer tissues were weakly stained or negative.
1	GATA1	2623	ERYF1|GATA-1|GF-1|GF1|NF-E1|NFE1|XLANP|XLTDA|XLTT	This gene encodes a protein which belongs to the GATA family of transcription factors. The protein plays an important role in erythroid development by regulating the switch of fetal hemoglobin to adult hemoglobin. Mutations in this gene have been associated with X-linked dyserythropoietic anemia and thrombocytopenia. [provided by RefSeq, Jul 2008]	GATA1 (GATA Binding Protein 1) is a Protein Coding gene. Diseases associated with GATA1 include Thrombocytopenia With Beta-Thalassemia, X-Linked and Thrombocytopenia, X-Linked, With Or Without Dyserythropoietic Anemia. Among its related pathways are C-MYB transcription factor network and Response to elevated platelet cytosolic Ca2+. Gene Ontology (GO) annotations related to this gene include DNA-…	Transcriptional activator or repressor which probably serves as a general switch factor for erythroid development. It binds to DNA sites with the consensus sequence 5'-[AT]GATA[AG]-3' within regulatory regions of globin genes and of other genes expressed in erythroid cells. Activates the transcription of genes involved in erythroid differentiation of K562 erythroleukemia cells, including HBB, HBG…	2	3	5	3 2	GATA binding protein 1	chrX:48786540-48794311	symbol	H. sapiens	protein-coding	This gene encodes a protein which belongs to the GATA family of transcription factors. The protein plays an important role in erythroid development by regulating the switch of fetal hemoglobin to adult hemoglobin. Mutations in this gene have been associated with X-linked dyserythropoietic anemia and thrombocytopenia. [provided by RefSeq, Jul 2008]	GO:0010725 regulation of primitive erythrocyte differentiation;GO:0030221 basophil differentiation;GO:0035854 eosinophil fate commitment	[GO:0003674] molecular_function; [GO:0043167] ion binding; [GO:0008150] biological_process; [GO:0034641] cellular nitrogen compound metabolic process; [GO:0009058] biosynthetic process; [GO:0005575] cellular_component; [GO:0005622] intracellular; [GO:0043226] organelle; [GO:0005634] nucleus; [GO:0003700] DNA-binding transcription factor activity; [GO:0003677] DNA binding; [GO:0030154] cell differ…	GO:0017053 transcriptional repressor complex;GO:0032993 protein-DNA complex;GO:0005667 transcription factor complex	GO:0070742 C2H2 zinc finger domain binding;GO:0002039 p53 binding;GO:0031490 chromatin DNA binding		Predicted intracellular proteins; Disease related genes; Transcription factors:Zinc-coordinating DNA-binding domains; Cancer-related genes	[IPR000679] Zinc finger, GATA-type; [IPR013088] Zinc finger, NHR/GATA-type; [IPR029524] Transcription factor GATA-1; [IPR039355] Transcription factor GATA; [IPR016374] Transcription factor, GATA-2/3	Nucleoplasm (reliability'])								MP:0005370 liver/biliary system phenotype; MP:0005385 cardiovascular system phenotype; MP:0010768 mortality/aging; MP:0005376 homeostasis/metabolism phenotype; MP:0005384 cellular phenotype; MP:0005378 growth/size/body region phenotype; MP:0005387 immune system phenotype; MP:0005390 skeleton phenotype; MP:0005397 hematopoietic system phenotype; MP:0010771 integument phenotype; MP:0005380 embryo p…	[ORPHA:86849] Acute basophilic leukemia; [ORPHA:99887] Acute megakaryoblastic leukemia in Down syndrome; [ORPHA:231393] Beta-thalassemia-X-linked thrombocytopenia syndrome; [ORPHA:124] Blackfan-Diamond anemia; [ORPHA:79277] Congenital erythropoietic porphyria; [ORPHA:67044] Thrombocytopenia with congenital dyserythropoietic anemia; [ORPHA:420611] Transient myeloproliferative syndrome; [ORPHA:3637…	OMIM ID:305371 Gata-binding protein 1	Diamond-Blackfan anemia; gene sequencing; Anemia; Thrombocytopenia; Macrothrombocytopenia; GATA-1-related thrombocytopenia with dyserythropoiesis; Anemia without thromobocytopenia, X-linked; Thrombocytopenia, platelet dysfunction, hemolysis, and imbalanced globin synthesis; Acute megakaryoblastic leukemia; Dyserythropoietic anemia with thrombocytopenia; Leukemia, megakaryoblastic, of Down syndrom…				Acute megakaryoblastic leukemia: pathogenic; Clinvar: phenotype not specified: pathogenic; Dyserythropoietic anemia with thrombocytopenia: pathogenic; Gata-1-related thrombocytopenia with dyserythropoiesis: pathogenic; Leukemia, megakaryoblastic, of down syndrome: pathogenic; Thrombocytopenia, x-linked, without dyserythropoietic anemia: pathogenic; Thrombocytopenia, platelet dysfunction, hemolysi…	HP:0006733:Acute megakaryocytic leukemia; HP:0004312:Abnormal reticulocyte morphology; HP:0012145:Abnormality of multiple cell lineages in the bone marrow; HP:0012135:Abnormal granulocytopoietic cell morphology; HP:0010472:Abnormal circulating porphyrin concentration; HP:0003467:Atlantoaxial instability; HP:0001905:Congenital thrombocytopenia; HP:0001096:Keratoconjunctivitis; HP:0001900:Increased…		ANEMIA, X-LINKED, WITH OR WITHOUT NEUTROPENIA AND/OR PLATELET ABNORMALITIES; Anemia due to decreased red cell production; Fetal thrombotic vasculopathy; Myeloid Proliferations Associated with Down Syndrome; THROMBOCYTOPENIA, X-LINKED, WITH DYSERYTHROPOIETIC ANEMIA; THROMBOCYTOPENIA, X-LINKED, WITH OR WITHOUT DYSERYTHROPOIETIC ANEMIA; THROMBOCYTOPENIA, X-LINKED, WITHOUT DYSERYTHROPOIETIC ANEMIA; T…	215	273	[{"UniProt":"P15976","EnsemblGene":["ENSG00000102145"],"SwissProt":["GATA1_HUMAN"]}]		Distribution: Detected in many; Specificity: Group enriched	antibody: Strong nuclear positivity was observed in testis and bone marrow. Remaining cells were negative or weakly stained. ; Selective nuclear expression in hematopoietic cells.	Antibody: Cases of prostate, lung cancer and malignant melanoma showed moderate cytoplasmic positivity. Remaining tumor cells were negative.
1	GMPS	8833	GATD7	In the de novo synthesis of purine nucleotides, IMP is the branch point metabolite at which point the pathway diverges to the synthesis of either guanine or adenine nucleotides. In the guanine nucleotide pathway, there are 2 enzymes involved in converting IMP to GMP, namely IMP dehydrogenase (IMPD1), which catalyzes the oxidation of IMP to XMP, and GMP synthetase, which catalyzes the amination of…	GMPS (Guanine Monophosphate Synthase) is a Protein Coding gene. Diseases associated with GMPS include Pallister-Killian Syndrome and Progressive Myoclonus Epilepsy 6. Among its related pathways are Thiopurine Pathway, Pharmacokinetics/Pharmacodynamics and purine nucleotides de novo biosynthesis. Gene Ontology (GO) annotations related to this gene include enzyme binding and transferase activity.	Involved in the de novo synthesis of guanine nucleotides which are not only essential for DNA and RNA synthesis, but also provide GTP, which is involved in a number of cellular processes important for cell division. GUAA_HUMAN,P49915	21 31	21 45	19 34	18 29	guanine monophosphate synthase	chr3:155869430-155944020	symbol	H. sapiens	protein-coding	In the de novo synthesis of purine nucleotides, IMP is the branch point metabolite at which point the pathway diverges to the synthesis of either guanine or adenine nucleotides. In the guanine nucleotide pathway, there are 2 enzymes involved in converting IMP to GMP, namely IMP dehydrogenase (IMPD1), which catalyzes the oxidation of IMP to XMP, and GMP synthetase, which catalyzes the amination of…	GO:0006177 GMP biosynthetic process;GO:0009113 purine nucleobase biosynthetic process;GO:1901070 guanosine-containing compound biosynthetic process	[GO:0003674] molecular_function; [GO:0043167] ion binding; [GO:0008150] biological_process; [GO:0034641] cellular nitrogen compound metabolic process; [GO:0009058] biosynthetic process; [GO:0044281] small molecule metabolic process; [GO:0016874] ligase activity; [GO:0005575] cellular_component; [GO:0005737] cytoplasm; [GO:0005622] intracellular; [GO:0005829] cytosol; [GO:0006520] cellular amino a…	GO:0005829 cytosol;GO:0044444 cytoplasmic part;GO:0005737 cytoplasm	GO:0003921 GMP synthase activity;GO:0003922 GMP synthase (glutamine-hydrolyzing) activity;GO:0016884 carbon-nitrogen ligase activity, with glutamine as amido-N-donor		Predicted intracellular proteins; Disease related genes; ENZYME proteins:Ligase; Enzymes; Potential drug targets	[IPR001674] GMP synthase, C-terminal; [IPR004739] GMP synthase, glutamine amidotransferase; [IPR014729] Rossmann-like alpha/beta/alpha sandwich fold; [IPR017926] Glutamine amidotransferase; [IPR022310] NAD/GMP synthase; [IPR025777] GMP synthetase ATP pyrophosphatase domain; [IPR029062] Class I glutamine amidotransferase-like	Cytosol (reliability'])					yes					OMIM ID:600358 Guanine monophosphate synthetase							Glutamic acid	African Trypanosomiasis; Hepatoblastoma Caused By Somatic Mutation; Lichen Planus, Oral; Hepatoblastoma; Diabetes Mellitus, Experimental; Tuberculosis; Adult Liver Carcinoma; Liver and Intrahepatic Biliary Tract Carcinoma; Liver neoplasms; Inflammatory Bowel Diseases; Malignant neoplasm of liver; Autoimmune Diseases; Liver carcinoma	7	72	[{"UniProt":"P49915","EnsemblGene":["ENSG00000163655"],"SwissProt":["GUAA_HUMAN"]},{"UniProt":"A0A140VJK6","RefSeq":[["NM_003875","NP_003866","REVIEWED"]],"SwissProt":["A0A140VJK6_HUMAN"]}]		Distribution: Detected in all; Specificity: Low tissue specificity
1	HERPUD1	9709	HERP|Mif1|SUP	The accumulation of unfolded proteins in the endoplasmic reticulum (ER) triggers the ER stress response. This response includes the inhibition of translation to prevent further accumulation of unfolded proteins, the increased expression of proteins involved in polypeptide folding, known as the unfolded protein response (UPR), and the destruction of misfolded proteins by the ER-associated protein …	HERPUD1 (Homocysteine Inducible ER Protein With Ubiquitin Like Domain 1) is a Protein Coding gene. Diseases associated with HERPUD1 include Achromatopsia 4. Among its related pathways are PERK regulates gene expression and Diurnally Regulated Genes with Circadian Orthologs. Gene Ontology (GO) annotations related to this gene include ion channel binding. An important paralog of this gene is HERPUD…	Component of the endoplasmic reticulum quality control (ERQC) system also called ER-associated degradation (ERAD) involved in ubiquitin-dependent degradation of misfolded endoplasmic reticulum proteins. Could enhance presenilin-mediated amyloid-beta protein 40 generation. Binds to ubiquilins and this interaction is required for efficient degradation of CD3D via the ERAD pathway (PubMed:18307982).…	66 64	62 87	74 121	93 58	homocysteine inducible ER protein with ubiquitin like domain 1	chr16:56932142-56944864	symbol	H. sapiens	protein-coding	The accumulation of unfolded proteins in the endoplasmic reticulum (ER) triggers the ER stress response. This response includes the inhibition of translation to prevent further accumulation of unfolded proteins, the increased expression of proteins involved in polypeptide folding, known as the unfolded protein response (UPR), and the destruction of misfolded proteins by the ER-associated protein …	GO:1903071 positive regulation of ER-associated ubiquitin-dependent protein catabolic process;GO:1903069 regulation of ER-associated ubiquitin-dependent protein catabolic process;GO:1904294 positive regulation of ERAD pathway	[GO:0003674] molecular_function; [GO:0005575] cellular_component; [GO:0005737] cytoplasm; [GO:0005622] intracellular; [GO:0043226] organelle; [GO:0005783] endoplasmic reticulum; [GO:0008150] biological_process; [GO:0006464] cellular protein modification process; [GO:0006950] response to stress; [GO:0009056] catabolic process; [GO:0006810] transport; [GO:0015031] protein transport; [GO:0007165] si…	GO:1990037 Lewy body core;GO:0097413 Lewy body;GO:0016234 inclusion body	GO:1990756 protein binding, bridging involved in substrate recognition for ubiquitination;GO:0044325 ion channel binding;GO:0030674 protein binding, bridging		Predicted intracellular proteins; Cancer-related genes	[IPR000626] Ubiquitin-like domain; [IPR029071] Ubiquitin-like domain superfamily; [IPR039751] Homocysteine-responsive endoplasmic reticulum-resident ubiquitin-like domain member 1 /2	Cytosol;Plasma membrane (reliability'])			yes	yes	yes		yes	MP:0005376 homeostasis/metabolism phenotype; MP:0003631 nervous system phenotype		OMIM ID:608070 Homocysteine- and endoplasmic reticulum stress-inducible protein, ubiquitin-like domain-containing, 1		Platelet Function Tests	1-Alkyl-2-acetylglycerophosphocholine Esterase;Atrial Fibrillation;Blood Pressure;Body Mass Index;Cholesterol;Cholesterol, HDL;Cholesterol, LDL;Coronary Disease;Diabetes Mellitus;Electrocardiography;Glucose;HIV-1;Heart Failure;Hematocrit;Hydroxymethylglutaryl CoA Reductases;Lipids;Lipoproteins;Macular Degeneration;Metabolic Syndrome X;Metabolism;Mortality;Neoplasms;Stroke;Triglycerides;Vascular C…					Peri-implant mucositis; Conversion disorder; Filarial Elephantiases; Reactive systemic amyloidosis; Common acute lymphoblastic leukemia; Niemann-Pick Disease, Type C1; Polypoidal choroidal vasculopathy; Drusen; Peri-Implantitis; alpha 1-Antitrypsin Deficiency; B Acute Lymphoblastic Leukemia with t(9;22)(q34.1;q11.2); BCR-ABL1; Alcohol or Other Drugs use; Adult Classical Hodgkin Lymphoma; Hyperhom…	26	76	[{"UniProt":"Q15011","EnsemblGene":["ENSG00000051108"],"RefSeq":[["NM_001272103","NP_001259032","REVIEWED"]],"SwissProt":["HERP1_HUMAN"]},{"UniProt":"A4UAE9","RefSeq":[["NM_001272103","NP_001259032","REVIEWED"]],"SwissProt":["A4UAE9_HUMAN"]},{"UniProt":"Q53FP9","RefSeq":[["NM_014685","NP_055500","REVIEWED"]],"SwissProt":["Q53FP9_HUMAN"]}]		Distribution: Detected in all; Specificity: Low tissue specificity	Ubiquitous cytoplasmic expression.; antibody: Most normal tissues showed moderate cytoplasmic and occasional membranous positivity. Intestinal tract, urinary bladder, glandular cells of post menopausal uterus, placenta and endocrine glands showed strong cytoplasmic immunoreactivity with a granular pattern. Lymphoid tissues and glial cells were weakly stained or negative.	Antibody: A majority of cancer tissues showed weak to moderate cytoplasmic staining with additional membranous positivity in several cases. Thyroid cancers along with several colorectal, prostate, urothelial and liver cancers showed strong immunoreactivity. Several cases of lymphomas and gliomas were negative.
1	HNRNPA2B1	3181	HNRNPA2|HNRNPB1|HNRPA2|HNRPA2B1|HNRPB1|IBMPFD2|RNPA2|SNRPB1	This gene belongs to the A/B subfamily of ubiquitously expressed heterogeneous nuclear ribonucleoproteins (hnRNPs). The hnRNPs are RNA binding proteins and they complex with heterogeneous nuclear RNA (hnRNA). These proteins are associated with pre-mRNAs in the nucleus and appear to influence pre-mRNA processing and other aspects of mRNA metabolism and transport. While all of the hnRNPs are presen…	HNRNPA2B1 (Heterogeneous Nuclear Ribonucleoprotein A2/B1) is a Protein Coding gene. Diseases associated with HNRNPA2B1 include Inclusion Body Myopathy With Early-Onset Paget Disease With Or Without Frontotemporal Dementia 2 and Inclusion Body Myopathy With Paget Disease Of Bone And Frontotemporal Dementia. Among its related pathways are Telomere Extension by Telomerase and Chromatin Regulation / …	Heterogeneous nuclear ribonucleoprotein (hnRNP) that associates with nascent pre-mRNAs, packaging them into hnRNP particles. The hnRNP particle arrangement on nascent hnRNA is non-random and sequence-dependent and serves to condense and stabilize the transcripts and minimize tangling and knotting. Packaging plays a role in various processes such as transcription, pre-mRNA processing, RNA nuclear …	119 175	131 156	156 134	106 149	heterogeneous nuclear ribonucleoprotein A2/B1	chr7:26200775-26189920	symbol	H. sapiens	protein-coding	This gene belongs to the A/B subfamily of ubiquitously expressed heterogeneous nuclear ribonucleoproteins (hnRNPs). The hnRNPs are RNA binding proteins and they complex with heterogeneous nuclear RNA (hnRNA). These proteins are associated with pre-mRNAs in the nucleus and appear to influence pre-mRNA processing and other aspects of mRNA metabolism and transport. While all of the hnRNPs are presen…	GO:1905663 positive regulation of telomerase RNA reverse transcriptase activity;GO:1905661 regulation of telomerase RNA reverse transcriptase activity;GO:1990428 miRNA transport	[GO:0003674] molecular_function; [GO:0008150] biological_process; [GO:0034641] cellular nitrogen compound metabolic process; [GO:0006397] mRNA processing; [GO:0006810] transport; [GO:0015031] protein transport; [GO:0006913] nucleocytoplasmic transport; [GO:0005575] cellular_component; [GO:0005622] intracellular; [GO:0043226] organelle; [GO:0005634] nucleus; [GO:0032991] protein-containing complex…	GO:0015030 Cajal body;GO:0071013 catalytic step 2 spliceosome;GO:0016363 nuclear matrix	GO:1990247 N6-methyladenosine-containing RNA binding;GO:0098505 G-rich strand telomeric DNA binding;GO:0097157 pre-mRNA intronic binding		Predicted intracellular proteins; Disease related genes; Cancer-related genes	[IPR000504] RNA recognition motif domain; [IPR012677] Nucleotide-binding alpha-beta plait domain superfamily; [IPR034486] hnRNP A2/B1, RNA recognition motif 1; [IPR034489] hnRNP A2/B1; [IPR035979] RNA-binding domain superfamily	Nucleoplasm (reliability'])	yes				yes				[ORPHA:52430] Inclusion body myopathy with Paget disease of bone and frontotemporal dementia	OMIM ID:600124 Heterogeneous nuclear ribonucleoprotein a2/b1	Inclusion body myopathy with early-onset Paget disease with or without frontotemporal dementia 2				Inclusion body myopathy with early-onset paget disease with or without frontotemporal dementia 2: pathogenic	HP:0012083:Ubiquitin-positive cerebral inclusion bodies; HP:0011314:Abnormality of long bone morphology; HP:0004347:Weakness of muscles of respiration; HP:0030838:Hip pain; HP:0002648:Abnormality of calvarial morphology; HP:0004490:Calvarial hyperostosis; HP:0000924:Abnormality of the skeletal system; HP:0002493:Upper motor neuron dysfunction; HP:0012548:Fatty replacement of skeletal muscle; HP:0…	Copper; Artenimol	INCLUSION BODY MYOPATHY WITH EARLY-ONSET PAGET DISEASE WITH OR WITHOUT FRONTOTEMPORAL DEMENTIA 2; Abnormality of long bone morphology; Ubiquitin-positive cerebral inclusion bodies; Weakness of muscles of respiration; Abnormality of calvarial morphology; Calvarial hyperostosis; Upper motor neuron dysfunction; Fatty replacement of skeletal muscle; EMG: chronic denervation signs; Cranial nerve compr…	88	310	[{"UniProt":"P22626","EnsemblGene":["ENSG00000122566"],"SwissProt":["ROA2_HUMAN"]}]		Distribution: Detected in all; Specificity: Low tissue specificity	Ubiquitous nuclear expression.; antibody: Most normal tissues displayed moderate to strong nuclear immunoreactivity. Hepatocytes showed weak cytoplasmic staining.	Antibody: Most cancer tissues displayed moderate to strong nuclear staining. Several lung cancers showed weak positivity.
1	HOOK3	84376	HK3	Hook proteins are cytosolic coiled-coil proteins that contain conserved N-terminal domains, which attach to microtubules, and more divergent C-terminal domains, which mediate binding to organelles. The Drosophila Hook protein is a component of the endocytic compartment.[supplied by OMIM, Apr 2004]	HOOK3 (Hook Microtubule Tethering Protein 3) is a Protein Coding gene. Diseases associated with HOOK3 include Small Intestine Neuroendocrine Neoplasm and Small Intestine Benign Neoplasm. Gene Ontology (GO) annotations related to this gene include identical protein binding and microtubule binding. An important paralog of this gene is HOOK1.	Probably serves as a target for the spiC protein from Salmonella typhimurium, which inactivates it, leading to a strong alteration in cellular trafficking (By similarity). Component of the FTS/Hook/FHIP complex (FHF complex). The FHF complex may function to promote vesicle trafficking and/or fusion via the homotypic vesicular protein sorting complex (the HOPS complex). May regulate clearance of e…	11 33	13 52	12 34	12 26	hook microtubule tethering protein 3	chr8:42896978-43030535	symbol	H. sapiens	protein-coding	Hook proteins are cytosolic coiled-coil proteins that contain conserved N-terminal domains, which attach to microtubules, and more divergent C-terminal domains, which mediate binding to organelles. The Drosophila Hook protein is a component of the endocytic compartment.[supplied by OMIM, Apr 2004]	GO:0022027 interkinetic nuclear migration;GO:0034454 microtubule anchoring at centrosome;GO:0072393 microtubule anchoring at microtubule organizing center	[GO:0003674] molecular_function; [GO:0005575] cellular_component; [GO:0005737] cytoplasm; [GO:0005622] intracellular; [GO:0008150] biological_process; [GO:0006810] transport; [GO:0015031] protein transport; [GO:0005829] cytosol; [GO:0043226] organelle; [GO:0005856] cytoskeleton; [GO:0005794] Golgi apparatus; [GO:0008092] cytoskeletal protein binding; [GO:0032991] protein-containing complex; [GO:0…	GO:0070695 FHF complex;GO:0030897 HOPS complex;GO:0000242 pericentriolar material	GO:0045503 dynein light chain binding;GO:0034452 dynactin binding;GO:0051959 dynein light intermediate chain binding		Predicted intracellular proteins; Cancer-related genes	[IPR001715] Calponin homology domain; [IPR008636] Hook-like protein family; [IPR036872] CH domain superfamily	Centriolar satellite (reliability']); Additional: Cytosol;Golgi apparatus						principal1		MP:0005376 homeostasis/metabolism phenotype; MP:0005378 growth/size/body region phenotype; MP:0005386 behavior/neurological phenotype; MP:0005371 limbs/digits/tail phenotype; MP:0005390 skeleton phenotype; MP:0005388 respiratory system phenotype; MP:0005375 adipose tissue phenotype		OMIM ID:607825 Hook microtubule tethering protein 3	Short stature							Plaque, Amyloid; Sclerocystic Ovaries; Senile Plaques; Polycystic Ovary Syndrome; Short stature; Papillary thyroid carcinoma; Alzheimer's Disease; Prostate carcinoma; Malignant neoplasm of prostate; Malignant neoplasm of breast; Neoplasms	9	36	[{"UniProt":"Q86VS8","EnsemblGene":["ENSG00000168172"],"EnsemblTrans":[["ENST00000307602","ENSP00000305699","principal1"]],"RefSeq":[["NM_032410","NP_115786","VALIDATED"]],"UCSC":["uc003xpr.4"],"SwissProt":["HOOK3_HUMAN"]}]		Distribution: Detected in all; Specificity: Low tissue specificity	General cytoplasmic expression.; antibody: Most normal tissues showed moderate cytoplasmic staining. The placenta, neuronal cell, bone marrow poetic cells and glomeruli showed strong cytoplasmic immunoreactivity. The liver were negative.	Antibody: A majority of malignancies showed weak to moderate cytoplasmic positivity. Several malignant gliomas and lymphomas were strongly stained. Renal cancers and several liver, endometrial, cervical and prostate cancers were negative.
1	HRAS	3265	C-BAS/HAS|C-H-RAS|C-HA-RAS1|CTLO|H-RASIDX|HAMSV|HRAS1|RASH1|p21ras	This gene belongs to the Ras oncogene family, whose members are related to the transforming genes of mammalian sarcoma retroviruses. The products encoded by these genes function in signal transduction pathways. These proteins can bind GTP and GDP, and they have intrinsic GTPase activity. This protein undergoes a continuous cycle of de- and re-palmitoylation, which regulates its rapid exchange bet…	HRAS (HRas Proto-Oncogene, GTPase) is a Protein Coding gene. Diseases associated with HRAS include Costello Syndrome and Schimmelpenning-Feuerstein-Mims Syndrome. Among its related pathways are Negative regulation of MAPK pathway and GDNF-Family Ligands and Receptor Interactions. Gene Ontology (GO) annotations related to this gene include GTP binding and protein C-terminus binding. An important p…	Involved in the activation of Ras protein signal transduction (PubMed:22821884). Ras proteins bind GDP/GTP and possess intrinsic GTPase activity (PubMed:12740440, PubMed:14500341, PubMed:9020151). RASH_HUMAN,P01112	37 37	36 44	41 61	26 26	HRas proto-oncogene, GTPase	chr11:535576-532242	symbol	H. sapiens	protein-coding	This gene belongs to the Ras oncogene family, whose members are related to the transforming genes of mammalian sarcoma retroviruses. The products encoded by these genes function in signal transduction pathways. These proteins can bind GTP and GDP, and they have intrinsic GTPase activity. This protein undergoes a continuous cycle of de- and re-palmitoylation, which regulates its rapid exchange bet…	GO:0035900 response to isolation stress;GO:2000630 positive regulation of miRNA metabolic process;GO:0098696 regulation of neurotransmitter receptor localization to postsynaptic specialization membrane	[GO:0007165] signal transduction; [GO:0008150] biological_process; [GO:0005575] cellular_component; [GO:0003674] molecular_function; [GO:0043167] ion binding; [GO:0003924] GTPase activity; [GO:0008283] cell population proliferation; [GO:0006464] cellular protein modification process; [GO:0040011] locomotion; [GO:0048870] cell motility; [GO:0034641] cellular nitrogen compound metabolic process; [G…	GO:0098978 glutamatergic synapse;GO:0048471 perinuclear region of cytoplasm;GO:0000139 Golgi membrane	GO:0019003 GDP binding;GO:0008022 protein C-terminus binding;GO:0003924 GTPase activity		Predicted intracellular proteins; Disease related genes; Cancer-related genes:Candidate cancer biomarkers; Cancer-related genes:Mutational cancer driver genes; RAS pathway related proteins; Cancer-related genes:Mutated cancer genes	[IPR001806] Small GTPase; [IPR005225] Small GTP-binding protein domain; [IPR020849] Small GTPase superfamily, Ras-type; [IPR027417] P-loop containing nucleoside triphosphate hydrolase	Cytosol;Nucleoplasm (reliability'])					yes			MP:0005367 renal/urinary system phenotype; MP:0005385 cardiovascular system phenotype; MP:0010768 mortality/aging; MP:0005369 muscle phenotype; MP:0005376 homeostasis/metabolism phenotype; MP:0005384 cellular phenotype; MP:0005378 growth/size/body region phenotype; MP:0005386 behavior/neurological phenotype; MP:0005381 digestive/alimentary phenotype; MP:0005387 immune system phenotype; MP:0002006…	[ORPHA:3071] COSTELLO SYNDROME; [ORPHA:146] Differentiated thyroid carcinoma; [ORPHA:2612] Linear nevus sebaceus syndrome; [ORPHA:2874] Phakomatosis pigmentokeratotica; [ORPHA:79414] Woolly hair nevus	OMIM ID:190020 Hras protooncogene, gtpase	Vascular Tumors Including Pyogenic Granuloma; Lung adenocarcinoma; Neoplasm of the thyroid gland; Malignant neoplasm of body of uterus; Adenocarcinoma of stomach; Neoplasm of the large intestine; Malignant melanoma of skin; Pancreatic adenocarcinoma; Chronic lymphocytic leukemia; Transitional cell carcinoma of the bladder; Multiple myeloma; Squamous cell lung carcinoma; Hepatocellular carcinoma; …			[218040] CONGENITAL MYOPATHY WITH EXCESS OF MUSCLE SPINDLES; [218040] COSTELLO SYNDROME	Acute myeloid leukemia: likely pathogenic,not provided,pathogenic; Adenocarcinoma of prostate: likely pathogenic,pathogenic; Adenocarcinoma of stomach: likely pathogenic,not provided,pathogenic; Adenoid cystic carcinoma: likely pathogenic,pathogenic; Bladder cancer, somatic: likely pathogenic,pathogenic; Costello syndrome: likely pathogenic,not provided,pathogenic,uncertain significance; Costello…	HP:0025510:Nevus spilus; HP:0004690:Thickened Achilles tendon; HP:0031842:Lymphangiectasis; HP:0012081:Enlarged cerebellum; HP:0010817:Linear nevus sebaceous; HP:0010815:Nevus sebaceous; HP:0005600:Congenital giant melanocytic nevus; HP:0002862:Bladder carcinoma; HP:0009588:Vestibular Schwannoma; HP:0010759:Prominence of the premaxilla; HP:0001814:Deep-set nails; HP:0001780:Abnormality of toe; HP…	Hexane-1,6-Diol; Trifluoroethanol; Guanosine-5'-Triphosphate; Guanosine-5'-Diphosphate; N,N'-DIMETHYL-N-(ACETYL)-N'-(7-NITROBENZ-2-OXA-1,3-DIAZOL-4-YL)ETHYLENEDIAMINE	COSTELLO SYNDROME, SEVERE; EPIDERMAL NEVUS WITH UROTHELIAL CANCER, SOMATIC; MYOPATHY, CONGENITAL, WITH EXCESS OF MUSCLE SPINDLES; Malignant neoplasm of spleen; Milia, Multiple Eruptive; NEVUS SPILUS, SOMATIC; Poor respiratory effort; SPITZ NEVUS, SOMATIC; Woolly hair nevus; Facial wart; Malignant melanoma - category; Phacomatosis pigmentokeratotica; Rhabdomyosarcoma with ganglionic differentiatio…	482	749	[{"UniProt":"P01112","EnsemblGene":["ENSG00000174775","ENSG00000276536"],"RefSeq":[["NM_001318054","NP_001304983","REVIEWED"]],"SwissProt":["RASH_HUMAN"]},{"UniProt":"X5D945","RefSeq":[["NM_001130442","NP_001123914","REVIEWED"],["NM_005343","NP_005334","REVIEWED"]],"UCSC":["uc001lpv.4"],"SwissProt":["X5D945_HUMAN"]}]	bone;tongue	Distribution: Detected in all; Specificity: Low tissue specificity	antibody: Strong cytoplasmic staining was observed in the CNS, lymphoid tissues and most glandular epithelia. Other normal tissues were in general weakly or moderately stained.; Cytoplasmic and membranous expression in most tissues.	Antibody: Cytoplasmic positivity of varying intensity was observed mainly in gliomas, lymphomas, testicular cancers and breast cancers. Most other cancer tissues were weakly stained.
1	IDH1	3417	HEL-216|HEL-S-26|IDCD|IDH|IDP|IDPC|PICD	Isocitrate dehydrogenases catalyze the oxidative decarboxylation of isocitrate to 2-oxoglutarate. These enzymes belong to two distinct subclasses, one of which utilizes NAD(+) as the electron acceptor and the other NADP(+). Five isocitrate dehydrogenases have been reported: three NAD(+)-dependent isocitrate dehydrogenases, which localize to the mitochondrial matrix, and two NADP(+)-dependent isoc…	IDH1 mutations have been observed in a number of cancer types, including sarcomas, hematologic malignancies, colon cancer and brain cancer. Mutations in the two isocitrate dehydrogenase enzymes involved in cytoplasmic (IDH1) and mitochondrial (IDH2) conversion of alpha-ketoglutarate to D-2-hydroxyglutarate have been described as mutually exclusive in many of these cancer types. The most frequent …	IDH1 (Isocitrate Dehydrogenase (NADP(+)) 1) is a Protein Coding gene. Diseases associated with IDH1 include Metaphyseal Enchondromatosis With D-2-Hydroxyglutaric Aciduria and Glioma Susceptibility 1. Among its related pathways are Abnormal conversion of 2-oxoglutarate to 2-hydroxyglutarate and Citrate cycle (TCA cycle). Gene Ontology (GO) annotations related to this gene include protein homodimer…	28 36	20 21	44 54	79 116	isocitrate dehydrogenase (NADP(+)) 1	chr2:208255071-208236227	symbol	H. sapiens	protein-coding	Isocitrate dehydrogenases catalyze the oxidative decarboxylation of isocitrate to 2-oxoglutarate. These enzymes belong to two distinct subclasses, one of which utilizes NAD(+) as the electron acceptor and the other NADP(+). Five isocitrate dehydrogenases have been reported: three NAD(+)-dependent isocitrate dehydrogenases, which localize to the mitochondrial matrix, and two NADP(+)-dependent isoc…	GO:0006097 glyoxylate cycle;GO:0006740 NADPH regeneration;GO:0006102 isocitrate metabolic process	[GO:0003674] molecular_function; [GO:0043167] ion binding; [GO:0008150] biological_process; [GO:0016491] oxidoreductase activity; [GO:0044281] small molecule metabolic process; [GO:0005575] cellular_component; [GO:0005737] cytoplasm; [GO:0005622] intracellular; [GO:0006091] generation of precursor metabolites and energy; [GO:0005829] cytosol; [GO:0043226] organelle; [GO:0005777] peroxisome; [GO:0…	GO:0005782 peroxisomal matrix;GO:0031907 microbody lumen;GO:1904724 tertiary granule lumen	GO:0004450 isocitrate dehydrogenase (NADP+) activity;GO:0004448 isocitrate dehydrogenase activity;GO:0050661 NADP binding		ENZYME proteins:Oxidoreductases; Predicted intracellular proteins; Disease related genes; Cancer-related genes:Mutational cancer driver genes; Enzymes; Potential drug targets; Citric acid cycle related proteins; Cancer-related genes:Mutated cancer genes	[IPR004790] Isocitrate dehydrogenase NADP-dependent; [IPR019818] Isocitrate/isopropylmalate dehydrogenase, conserved site; [IPR024084] Isopropylmalate dehydrogenase-like domain	Cytosol;Nuclear bodies (reliability'])					yes	principal1		MP:0010768 mortality/aging; MP:0005376 homeostasis/metabolism phenotype; MP:0005378 growth/size/body region phenotype; MP:0005387 immune system phenotype; MP:0005390 skeleton phenotype; MP:0005397 hematopoietic system phenotype; MP:0005388 respiratory system phenotype	[ORPHA:251579] Giant cell glioblastoma; [ORPHA:251576] Gliosarcoma; [ORPHA:163634] Maffucci syndrome; [ORPHA:99646] Metaphyseal chondromatosis with D-2-hydroxyglutaric aciduria; [ORPHA:296] Ollier disease	OMIM ID:147700 Isocitrate dehydrogenase 1	Glioblastoma; Multiple myeloma; Acute myeloid leukemia; Medulloblastoma; Myelodysplastic syndrome; Astrocytoma; Hepatocellular carcinoma; Neoplasm of the breast; Neoplasm of brain; Transitional cell carcinoma of the bladder; Brainstem glioma; Lung adenocarcinoma; Neoplasm of the large intestine; Malignant melanoma of skin; Adenocarcinoma of prostate; Adenoid cystic carcinoma; Glioblastoma multifo…				Acute myeloid leukemia: likely pathogenic,not provided,pathogenic; Adenocarcinoma of prostate: likely pathogenic,not provided,pathogenic; Adenoid cystic carcinoma: likely pathogenic,not provided,pathogenic; Astrocytoma: likely pathogenic,not provided,pathogenic; Brainstem glioma: likely pathogenic,not provided,pathogenic; Glioblastoma multiforme, somatic: likely pathogenic,not provided,pathogenic…	HP:0007461:Hemangiomatosis; HP:0100641:Neoplasm of the adrenal cortex; HP:0006765:Chondrosarcoma; HP:0005701:Multiple enchondromatosis; HP:0100764:Lymphangioma; HP:0002888:Ependymoma; HP:0002897:Parathyroid adenoma; HP:0100761:Visceral angiomatosis; HP:0100777:Exostoses; HP:0009592:Astrocytoma; HP:0012174:Glioblastoma multiforme; HP:0002893:Pituitary adenoma; HP:0100021:Cerebral palsy; HP:0100615…	Isocitric Acid; Nicotinamide adenine dinucleotide phosphate; Ivosidenib	Clear Cell Hepatocellular Carcinoma; GLIOBLASTOMA MULTIFORME, SOMATIC; Intrahepatic cholangiocarcinoma recurrent; METAPHYSEAL ENCHONDROMATOSIS WITH D-2-HYDROXYGLUTARIC ACIDURIA; Anaplastic Astrocytoma, IDH-Mutant; Diffuse Astrocytoma, IDH-Wildtype; Oligodendroglioma, IDH-Mutant and 1p/19q-Codeleted; Thalamic Neoplasm; Acute myeloid leukemia in remission; Angiocentric glioma; Chondroblastic osteos…	675	719	[{"UniProt":"O75874","EnsemblGene":["ENSG00000138413"],"EnsemblTrans":[["ENST00000345146","ENSP00000260985","principal1"],["ENST00000415913","ENSP00000390265","principal1"],["ENST00000446179","ENSP00000410513","principal1"]],"RefSeq":[["NM_001282386","NP_001269315","REVIEWED"],["NM_001282387","NP_001269316","REVIEWED"],["NM_005896","NP_005887","REVIEWED"]],"SwissProt":["IDHC_HUMAN"]},{"UniProt":"…		Distribution: Detected in all; Specificity: Low tissue specificity	Cytoplasmic expression with a granular pattern in several tissues. Highly abundant in the male reproductive system, especially in prostate glandular cells.; antibody: Normal tissues displayed weak to moderate cytoplasmic staining with additional nuclear positivity in several tissues. Adrenocortical cells, gall bladder, chondrocytes, urinary bladder, male genital tract and glandular cells of uteru…	Antibody: Majority of tumor tissues displayed weak to moderate cytoplasmic and nuclear positivity. Membranous staining was observed in few cases of colorectal, pancreatic and endometrial cancers. Prostate cancers along with occasional cases of breast, endometrial, stomach and pancreatic cancers were strongly stained. Most of the cases of lymphomas, melanomas, skin and renal cancers were negative.
1	IDH2	3418	D2HGA2|ICD-M|IDH|IDHM|IDP|IDPM|mNADP-IDH	Isocitrate dehydrogenases catalyze the oxidative decarboxylation of isocitrate to 2-oxoglutarate. These enzymes belong to two distinct subclasses, one of which utilizes NAD(+) as the electron acceptor and the other NADP(+). Five isocitrate dehydrogenases have been reported: three NAD(+)-dependent isocitrate dehydrogenases, which localize to the mitochondrial matrix, and two NADP(+)-dependent isoc…	IDH2 (Isocitrate Dehydrogenase (NADP(+)) 2) is a Protein Coding gene. Diseases associated with IDH2 include D-2-Hydroxyglutaric Aciduria 2 and D-2-Hydroxyglutaric Aciduria 1. Among its related pathways are Metabolism and Carbon metabolism. Gene Ontology (GO) annotations related to this gene include magnesium ion binding and oxidoreductase activity, acting on the CH-OH group of donors, NAD or NADP…	Plays a role in intermediary metabolism and energy production. It may tightly associate or interact with the pyruvate dehydrogenase complex. IDHP_HUMAN,P48735	117 161	140 177	101 108	110 143	isocitrate dehydrogenase (NADP(+)) 2	chr15:90102468-90083045	symbol	H. sapiens	protein-coding	Isocitrate dehydrogenases catalyze the oxidative decarboxylation of isocitrate to 2-oxoglutarate. These enzymes belong to two distinct subclasses, one of which utilizes NAD(+) as the electron acceptor and the other NADP(+). Five isocitrate dehydrogenases have been reported: three NAD(+)-dependent isocitrate dehydrogenases, which localize to the mitochondrial matrix, and two NADP(+)-dependent isoc…	GO:0006097 glyoxylate cycle;GO:0006741 NADP biosynthetic process;GO:1903976 negative regulation of glial cell migration	[GO:0003674] molecular_function; [GO:0043167] ion binding; [GO:0008150] biological_process; [GO:0016491] oxidoreductase activity; [GO:0044281] small molecule metabolic process; [GO:0006091] generation of precursor metabolites and energy; [GO:0005575] cellular_component; [GO:0005737] cytoplasm; [GO:0005622] intracellular; [GO:0043226] organelle; [GO:0005739] mitochondrion; [GO:0005975] carbohydrat…	GO:0005777 peroxisome;GO:0042579 microbody;GO:0005759 mitochondrial matrix	GO:0004450 isocitrate dehydrogenase (NADP+) activity;GO:0004448 isocitrate dehydrogenase activity;GO:0051287 NAD binding		ENZYME proteins:Oxidoreductases; Predicted intracellular proteins; FDA approved drug targets:Small molecule drugs; Disease related genes; Cancer-related genes:Mutational cancer driver genes; Enzymes; Citric acid cycle related proteins; Cancer-related genes:Mutated cancer genes	[IPR004790] Isocitrate dehydrogenase NADP-dependent; [IPR019818] Isocitrate/isopropylmalate dehydrogenase, conserved site; [IPR024084] Isopropylmalate dehydrogenase-like domain	Mitochondria (reliability'])					yes			MP:0005385 cardiovascular system phenotype; MP:0002006 neoplasm; MP:0005371 limbs/digits/tail phenotype; MP:0005390 skeleton phenotype	[ORPHA:251589] Anaplastic astrocytoma; [ORPHA:251663] Anaplastic oligoastrocytoma; [ORPHA:251630] Anaplastic oligodendroglioma; [ORPHA:79315] D-2-hydroxyglutaric aciduria; [ORPHA:251601] Fibrillary astrocytoma; [ORPHA:251604] Gemistocytic astrocytoma; [ORPHA:163634] Maffucci syndrome; [ORPHA:251656] Oligoastrocytoma; [ORPHA:251627] Oligodendroglioma; [ORPHA:296] Ollier disease; [ORPHA:251598] Pro…	OMIM ID:147650 Isocitrate dehydrogenase 2	D-2-hydroxyglutaric aciduria 2; Neoplasm of brain; Hepatocellular carcinoma; Brainstem glioma; Neoplasm of the large intestine; Acute myeloid leukemia; Multiple myeloma; Squamous cell carcinoma of the head and neck; Myelodysplastic syndrome		Clusterin		Acute myeloid leukemia: likely pathogenic,not provided,pathogenic; Brainstem glioma: likely pathogenic,not provided,pathogenic; Clinvar: phenotype not specified: likely pathogenic,pathogenic; D-2-hydroxyglutaric aciduria 2: likely pathogenic,pathogenic; Hepatocellular carcinoma: likely pathogenic,not provided,pathogenic; Myelodysplastic syndrome: likely pathogenic,not provided,pathogenic; Multipl…	HP:0012321:D-2-hydroxyglutaric aciduria; HP:0007461:Hemangiomatosis; HP:0100641:Neoplasm of the adrenal cortex; HP:0006765:Chondrosarcoma; HP:0005701:Multiple enchondromatosis; HP:0100764:Lymphangioma; HP:0002897:Parathyroid adenoma; HP:0100761:Visceral angiomatosis; HP:0100777:Exostoses; HP:0009592:Astrocytoma; HP:0002893:Pituitary adenoma; HP:0100021:Cerebral palsy; HP:0100615:Ovarian neoplasm;…	Isocitric Acid; Enasidenib	Telangiectatic osteosarcoma; Anaplastic Astrocytoma, IDH-Mutant; D-2-HYDROXYGLUTARIC ACIDURIA 2; Diffuse Astrocytoma, IDH-Wildtype; Oligodendroglioma, IDH-Mutant and 1p/19q-Codeleted; Diffuse leptomeningeal glioneuronal neoplasm; Hemangiomatosis; Rosette-forming glioneuronal neoplasm; D-2-HYDROXYGLUTARIC ACIDURIA 1; Mononeuritis Multiplex; Anaplastic Astrocytoma, IDH-Wildtype; D-2-hydroxyglutaric…	315	361	[{"UniProt":"P48735","EnsemblGene":["ENSG00000182054"],"RefSeq":[["NM_001290114","NP_001277043","REVIEWED"]],"SwissProt":["IDHP_HUMAN"]},{"UniProt":"B4DSZ6","RefSeq":[["NM_001290114","NP_001277043","REVIEWED"]],"SwissProt":["B4DSZ6_HUMAN"]}]		Distribution: Detected in all; Specificity: Tissue enhanced	General cytoplasmic expression with a granular pattern.; antibody: Moderate to strong granular cytoplasmic positivity were seen in most normal tissues. Liver and spleen were mostly negative.	Antibody: Moderate to strong granular cytoplasmic positivity was observed i most malignancies. Malignant melanoma lung, testis, urothelial, renal and pancreatic cancers were weakly stained or negative in several cases.
1	KIT	3815	C-Kit|CD117|MASTC|PBT|SCFR	This gene encodes a receptor tyrosine kinase. This gene was initially identified as a homolog of the feline sarcoma viral oncogene v-kit and is often referred to as proto-oncogene c-Kit. The canonical form of this glycosylated transmembrane protein has an N-terminal extracellular region with five immunoglobulin-like domains, a transmembrane region, and an intracellular tyrosine kinase domain at t…	KIT (KIT Proto-Oncogene, Receptor Tyrosine Kinase) is a Protein Coding gene. Diseases associated with KIT include Gastrointestinal Stromal Tumor and Piebald Trait. Among its related pathways are RET signaling and Signaling by GPCR. Gene Ontology (GO) annotations related to this gene include protein homodimerization activity and protein kinase activity. An important paralog of this gene is CSF1R.	Tyrosine-protein kinase that acts as cell-surface receptor for the cytokine KITLG/SCF and plays an essential role in the regulation of cell survival and proliferation, hematopoiesis, stem cell maintenance, gametogenesis, mast cell development, migration and function, and in melanogenesis. In response to KITLG/SCF binding, KIT can activate several signaling pathways. Phosphorylates PIK3R1, PLCG1, …	8 8	7 6	23 24	5 6	KIT proto-oncogene, receptor tyrosine kinase	chr4:54657957-54740715	symbol	H. sapiens	protein-coding	This gene encodes a receptor tyrosine kinase. This gene was initially identified as a homolog of the feline sarcoma viral oncogene v-kit and is often referred to as proto-oncogene c-Kit. The canonical form of this glycosylated transmembrane protein has an N-terminal extracellular region with five immunoglobulin-like domains, a transmembrane region, and an intracellular tyrosine kinase domain at t…	GO:0097326 melanocyte adhesion;GO:0014828 distal stomach smooth muscle contraction;GO:0120064 stomach pylorus smooth muscle contraction	[GO:0003674] molecular_function; [GO:0043167] ion binding; [GO:0008150] biological_process; [GO:0006464] cellular protein modification process; [GO:0016301] kinase activity; [GO:0007165] signal transduction; [GO:0002376] immune system process; [GO:0005575] cellular_component; [GO:0005576] extracellular region; [GO:0005615] extracellular space; [GO:0030154] cell differentiation; [GO:0048856] anato…	GO:0042629 mast cell granule;GO:0001669 acrosomal vesicle;GO:0001650 fibrillar center	GO:0005020 stem cell factor receptor activity;GO:0042169 SH2 domain binding;GO:0004714 transmembrane receptor protein tyrosine kinase activity	Tyr protein kinase family	CD markers; FDA approved drug targets:Small molecule drugs; Disease related genes; FDA approved drug targets:Biotech drugs; Cancer-related genes:Candidate cancer biomarkers; Cancer-related genes:Mutational cancer driver genes; Enzymes; Kinases:Tyr protein kinases; ENZYME proteins:Transferases; RAS pathway related proteins; Cancer-related genes:Mutated cancer genes	[IPR000719] Protein kinase domain; [IPR001245] Serine-threonine/tyrosine-protein kinase, catalytic domain; [IPR001824] Tyrosine-protein kinase, receptor class III, conserved site; [IPR003598] Immunoglobulin subtype 2; [IPR003599] Immunoglobulin subtype; [IPR007110] Immunoglobulin-like domain; [IPR008266] Tyrosine-protein kinase, active site; [IPR011009] Protein kinase-like domain superfamily; [IP…	Plasma membrane (reliability'])			yes	yes	yes		yes	MP:0005367 renal/urinary system phenotype; MP:0005370 liver/biliary system phenotype; MP:0005385 cardiovascular system phenotype; MP:0010768 mortality/aging; MP:0005369 muscle phenotype; MP:0005376 homeostasis/metabolism phenotype; MP:0005384 cellular phenotype; MP:0005378 growth/size/body region phenotype; MP:0005386 behavior/neurological phenotype; MP:0005381 digestive/alimentary phenotype; MP:…	[ORPHA:98834] Acute myeloblastic leukemia with maturation; [ORPHA:98829] Acute myeloid leukemia with abnormal bone marrow eosinophils inv16p13q22 or t16; [ORPHA:102724] Acute myeloid leukemia with t8; [ORPHA:280785] Bullous diffuse cutaneous mastocytosis; [ORPHA:79455] Cutaneous mastocytoma; [ORPHA:44890] Gastrointestinal stromal tumor; [ORPHA:158778] Isolated bone marrow mastocytosis; [ORPHA:158…	OMIM ID:164920 Kit protooncogene, receptor tyrosine kinase	Gastrointestinal stromal tumor; Cutaneous mastocytosis; B Lymphoblastic Leukemia/Lymphoma with t(v;11q23.3); KMT2A Rearranged; Partial albinism; Malignant melanoma of skin; Adenocarcinoma of stomach; Cutaneous melanoma; Mast cell disease, systemic; Myeloproliferative Neoplasm; Acute myeloid leukemia; Thymoma; Non-small cell lung cancer; Piebaldism, progressive; Gastrointestinal stromal tumor, fam…	Anger;Atherosclerosis;Basophils;Breast Neoplasms;Insulin-Like Growth Factor I;Maximal Midexpiratory Flow Rate;Platelet Function Tests	Bipolar Disorder;Body Height;Breast Feeding;Bronchodilator Agents;Drug Resistance;Erythrocyte Count;Erythrocyte Indices;Forced Expiratory Volume;Hematocrit;Hemoglobins;Schizophrenia	[172800] human piebaldism	Acute myeloid leukemia: likely pathogenic,other,pathogenic,uncertain significance; Adenocarcinoma of stomach: likely pathogenic,pathogenic; Clinvar: phenotype not specified: likely pathogenic,other,pathogenic; Cutaneous mastocytosis: likely pathogenic,other,pathogenic,uncertain significance; Cutaneous melanoma: likely pathogenic,not provided,other,pathogenic,uncertain significance; Dysgerminoma: …	HP:0007583:Telangiectasia macularis eruptiva perstans; HP:0200151:Cutaneous mastocytosis; HP:0007542:Absent pigmentation of the ventral chest; HP:0007544:Piebaldism; HP:0005587:Profuse pigmented skin lesions; HP:0100495:Mastocytosis; HP:0012325:Chronic myelomonocytic leukemia; HP:0100768:Choriocarcinoma; HP:0009792:Teratoma; HP:0012539:Non-Hodgkin lymphoma; HP:0006543:Cardiorespiratory arrest; HP…	Sorafenib; Imatinib; Dasatinib; Sunitinib; Phosphonotyrosine; Nilotinib; XL820; OSI-930; ABT-869; Pazopanib; Midostaurin; Regorafenib; Ponatinib; Lenvatinib; Ancestim; Fostamatinib; Erdafitinib; Amuvatinib; Pexidartinib; Ripretinib; Avapritinib	B lymphoblastic leukemia lymphoma with t(v;11q23); MLL rearranged; Esophageal Melanoma; Familial mastocytosis; GASTROINTESTINAL STROMAL TUMOR, FAMILIAL; Gammopathy; Gastroduodenal intussusception; Gastrointestinal Stromal Tumor of the Gastrointestinal Tract; Hidrocystoma; Idiopathic anaphylaxis; Intermediate Risk Gastrointestinal Stromal Tumor; Isolated bone marrow mastocytosis; MASTOCYTOSIS, CUT…	930	1060	[{"UniProt":"P10721","EnsemblGene":["ENSG00000157404"],"SwissProt":["KIT_HUMAN"]},{"UniProt":"A0A0U2N547","RefSeq":[["XM_017008180","XP_016863669"]],"SwissProt":["A0A0U2N547_HUMAN"]}]	ovary	Distribution: Detected in all; Specificity: Tissue enhanced	antibody: A subset of inflammatory cells were distinctly positive in the cytoplasm. Molecular layer of cerebellum and melanocytes were moderately stained. Remaining normal tissues were mainly negative.; Selective cytoplasmic and membranous expression in a few cell types including subset of cells in breast, melanocytes in skin, basket cells in cerebellum and subsets of peripheral immune cells.	Antibody: Cancer cells were generally negative. Several cases of melanoma and testicular seminoma as well as a rare case of basal cell carcinoma and urothelial cancer displayed moderate to strong cytoplasmic and membranous staining.
1	LCK	3932	IMD22|LSK|YT16|p56lck|pp58lck	This gene is a member of the Src family of protein tyrosine kinases (PTKs). The encoded protein is a key signaling molecule in the selection and maturation of developing T-cells. It contains N-terminal sites for myristylation and palmitylation, a PTK domain, and SH2 and SH3 domains which are involved in mediating protein-protein interactions with phosphotyrosine-containing and proline-rich motifs…	LCK (LCK Proto-Oncogene, Src Family Tyrosine Kinase) is a Protein Coding gene. Diseases associated with LCK include Immunodeficiency 22 and Autoimmune Cardiomyopathy. Among its related pathways are RET signaling and CD28 co-stimulation. Gene Ontology (GO) annotations related to this gene include identical protein binding and protein kinase activity. An important paralog of this gene is HCK.	Non-receptor tyrosine-protein kinase that plays an essential role in the selection and maturation of developing T-cells in the thymus and in the function of mature T-cells. Plays a key role in T-cell antigen receptor (TCR)-linked signal transduction pathways. Constitutively associated with the cytoplasmic portions of the CD4 and CD8 surface receptors. Association of the TCR with a peptide antigen…	6 5	3 2	12 11	11 8	LCK proto-oncogene, Src family tyrosine kinase	chr1:32251265-32286165	symbol	H. sapiens	protein-coding	This gene is a member of the Src family of protein tyrosine kinases (PTKs). The encoded protein is a key signaling molecule in the selection and maturation of developing T-cells. It contains N-terminal sites for myristylation and palmitylation, a PTK domain, and SH2 and SH3 domains which are involved in mediating protein-protein interactions with phosphotyrosine-containing and proline-rich motifs…	GO:0050862 positive regulation of T cell receptor signaling pathway;GO:0034116 positive regulation of heterotypic cell-cell adhesion;GO:0050857 positive regulation of antigen receptor-mediated signaling pathway	[GO:0003674] molecular_function; [GO:0043167] ion binding; [GO:0008150] biological_process; [GO:0006464] cellular protein modification process; [GO:0016301] kinase activity; [GO:0005575] cellular_component; [GO:0005737] cytoplasm; [GO:0005622] intracellular; [GO:0005886] plasma membrane; [GO:0005829] cytosol; [GO:0044403] symbiotic process; [GO:0040011] locomotion; [GO:0002376] immune system proc…	GO:0000242 pericentriolar material;GO:0001772 immunological synapse;GO:0031234 extrinsic component of cytoplasmic side of plasma membrane	GO:0042610 CD8 receptor binding;GO:0042608 T cell receptor binding;GO:0042609 CD4 receptor binding	Tyr protein kinase family	Predicted intracellular proteins; FDA approved drug targets:Small molecule drugs; Disease related genes; Cancer-related genes; Enzymes; Kinases:Tyr protein kinases; ENZYME proteins:Transferases	[IPR000719] Protein kinase domain; [IPR000980] SH2 domain; [IPR001245] Serine-threonine/tyrosine-protein kinase, catalytic domain; [IPR001452] SH3 domain; [IPR008266] Tyrosine-protein kinase, active site; [IPR011009] Protein kinase-like domain superfamily; [IPR017441] Protein kinase, ATP binding site; [IPR020635] Tyrosine-protein kinase, catalytic domain; [IPR035749] Lck, SH3 domain; [IPR035850] …	Golgi apparatus (reliability'])								MP:0010768 mortality/aging; MP:0005384 cellular phenotype; MP:0005387 immune system phenotype; MP:0002006 neoplasm; MP:0005397 hematopoietic system phenotype; MP:0005379 endocrine/exocrine gland phenotype	[ORPHA:280142] Severe combined immunodeficiency due to LCK deficiency	OMIM ID:153390 Lymphocyte-specific protein-tyrosine kinase	Immunodeficiency 22				Immunodeficiency 22: pathogenic	HP:0005407:Decreased proportion of CD4-positive T cells; HP:0012490:Panniculitis; HP:0002960:Autoimmunity; HP:0002721:Immunodeficiency; HP:0002014:Diarrhea; HP:0002205:Recurrent respiratory infections; HP:0003593:Infantile onset; HP:0001508:Failure to thrive; HP:0000007:Autosomal recessive inheritance	Dasatinib; AP-22408; Staurosporine; 1-Tert-Butyl-3-(4-Chloro-Phenyl)-1h-Pyrazolo[3,4-D]Pyrimidin-4-Ylamine; {4-[(2S)-2-Acetamido-3-({(1S)-1-[3-carbamoyl-4-(cyclohexylmethoxy)phenyl]ethyl}amino)-3-oxopropyl]-2-phosphonophenoxy}acetic acid; Phosphoaminophosphonic Acid-Adenylate Ester; 3-(2-AMINOQUINAZOLIN-6-YL)-4-METHYL-N-[3-(TRIFLUOROMETHYL)PHENYL]BENZAMIDE; 2,3-DIPHENYL-N-(2-PIPERAZIN-1-YLETHYL)F…	IMMUNODEFICIENCY 22; PHOTOPAROXYSMAL RESPONSE 1; Chronic heart disease; Immunodeficiency congenital; Decreased proportion of CD4-positive T cells; Diabetes in children; Panniculitis; Allergic Conjunctivitis; Rous Sarcoma; Epidermodysplasia Verruciformis; Autoimmune state; Primary Lesion; Combined immunodeficiency; Nijmegen Breakage Syndrome; Glucocorticoid Receptor Deficiency; Sezary Syndrome; Le…	155	525	[{"UniProt":"Q573B4","EnsemblGene":["ENSG00000182866"],"EnsemblTrans":[["ENST00000373564","ENSP00000362665",""]],"RefSeq":[["XM_011541453","XP_011539755","MODEL"],["XM_011541454","XP_011539756"]],"UCSC":["uc057ejm.1"],"SwissProt":["Q573B4_HUMAN"]},{"UniProt":"P06239","EnsemblGene":["ENSG00000182866"],"SwissProt":["LCK_HUMAN"]},{"UniProt":"A0A0S2Z3Y4","RefSeq":[["NM_001330468","NP_001317397","REVI…	larynx;lymph_node	Distribution: Detected in many; Specificity: Group enriched	antibody: Lymphoid cells and a subset of cells in bone marrow showed strong cytoplasmic and membranous immunoreactivity. Remaining normal tissues were generally negative.; Distinct cytoplasmic expression in immune cells in several tissues.	Antibody: Most cases of malignant lymphomas displayed strong cytoplasmic and membranous staining. Other malignancies were negative.
1	LCP1	3936	CP64|HEL-S-37|L-PLASTIN|LC64P|LPL|PLS2	Plastins are a family of actin-binding proteins that are conserved throughout eukaryote evolution and expressed in most tissues of higher eukaryotes. In humans, two ubiquitous plastin isoforms (L and T) have been identified. Plastin 1 (otherwise known as Fimbrin) is a third distinct plastin isoform which is specifically expressed at high levels in the small intestine. The L isoform is expressed o…	LCP1 (Lymphocyte Cytosolic Protein 1) is a Protein Coding gene. Diseases associated with LCP1 include B-Cell Non-Hodgkin Lymphoma and Orbital Granuloma. Among its related pathways are NF-kappaB Signaling. Gene Ontology (GO) annotations related to this gene include calcium ion binding and actin binding. An important paralog of this gene is PLS3.	Actin-binding protein (PubMed:16636079, PubMed:17294403, PubMed:28493397). Plays a role in the activation of T-cells in response to costimulation through TCR/CD3 and CD2 or CD28 (PubMed:17294403). Modulates the cell surface expression of IL2RA/CD25 and CD69 (PubMed:17294403). PLSL_HUMAN,P13796	19 32	10 15	17 34	33 55	lymphocyte cytosolic protein 1	chr13:46182177-46125923	symbol	H. sapiens	protein-coding	Plastins are a family of actin-binding proteins that are conserved throughout eukaryote evolution and expressed in most tissues of higher eukaryotes. In humans, two ubiquitous plastin isoforms (L and T) have been identified. Plastin 1 (otherwise known as Fimbrin) is a third distinct plastin isoform which is specifically expressed at high levels in the small intestine. The L isoform is expressed o…	GO:0051639 actin filament network formation;GO:0071803 positive regulation of podosome assembly;GO:0071801 regulation of podosome assembly	[GO:0003674] molecular_function; [GO:0043167] ion binding; [GO:0008092] cytoskeletal protein binding; [GO:0008150] biological_process; [GO:0022607] cellular component assembly; [GO:0007010] cytoskeleton organization; [GO:0005575] cellular_component; [GO:0005737] cytoplasm; [GO:0005622] intracellular; [GO:0005829] cytosol; [GO:0005886] plasma membrane; [GO:0043226] organelle; [GO:0005856] cytoskel…	GO:0001891 phagocytic cup;GO:0002102 podosome;GO:0001725 stress fiber	GO:0005178 integrin binding;GO:0051015 actin filament binding;GO:0003779 actin binding		Disease related genes; Cancer-related genes:Mutational cancer driver genes; Predicted intracellular proteins	[IPR001589] Actinin-type actin-binding domain, conserved site; [IPR001715] Calponin homology domain; [IPR002048] EF-hand domain; [IPR011992] EF-hand domain pair; [IPR018247] EF-Hand 1, calcium-binding site; [IPR036872] CH domain superfamily; [IPR039956] Plastin-2/3; [IPR039959] Fimbrin/Plastin	Cytosol;Plasma membrane (reliability']); Additional: Actin filaments					yes			MP:0010768 mortality/aging; MP:0005376 homeostasis/metabolism phenotype; MP:0005386 behavior/neurological phenotype; MP:0005387 immune system phenotype; MP:0005397 hematopoietic system phenotype		OMIM ID:153430 Lymphocyte cytosolic protein 1		Platelet Function Tests	Non-alcoholic Fatty Liver Disease		Clinvar: phenotype not specified: pathogenic; High-density lipoprotein cholesterol: pathogenic; Hyperapobetalipoproteinemia: likely pathogenic,pathogenic; Hyperlipoproteinemia, type i: likely pathogenic,pathogenic; Inborn genetic diseases: pathogenic; Lipoprotein lipase (olbia): pathogenic; Metabolic syndrome: pathogenic			Nicotine Use Disorder; Tobacco Dependence; Hypereosinophilia; Congenital ocular coloboma (disorder); Nicotine Dependence; Progression of prostate cancer; Malignant neoplasm of soft tissue; Lip and Oral Cavity Carcinoma; Recurrent tumor; Malignant neoplasm of mouth; Retinoblastoma; Sarcoma; Liver Cirrhosis, Experimental; Colonic Neoplasms; Non-alcoholic Fatty Liver Disease; Ischemic stroke; Colore…	38	100	[{"UniProt":"P13796","EnsemblGene":["ENSG00000136167"],"SwissProt":["PLSL_HUMAN"]},{"UniProt":"A0A024RDT4","RefSeq":[["NM_002298","NP_002289","REVIEWED"],["XM_005266374","XP_005266431","MODEL"]],"SwissProt":["A0A024RDT4_HUMAN"]}]	lymph_node	Distribution: Detected in many; Specificity: Tissue enhanced	Selective cytoplasmic expression in immune cells.; antibody: Strong cytoplasmic immunoreactivity was observed in lymphoid tissues. Remaining normal tissues were negative.	Antibody: Strong cytoplasmic immunoreactivity was observed in lymphomas. The remaining cancer cells were negative.
1	LMO2	4005	LMO-2|RBTN2|RBTNL1|RHOM2|TTG2	LMO2 encodes a cysteine-rich, two LIM-domain protein that is required for yolk sac erythropoiesis. The LMO2 protein has a central and crucial role in hematopoietic development and is highly conserved. The LMO2 transcription start site is located approximately 25 kb downstream from the 11p13 T-cell translocation cluster (11p13 ttc), where a number T-cell acute lymphoblastic leukemia-specific trans…	LMO2 (LIM Domain Only 2) is a Protein Coding gene. Diseases associated with LMO2 include T-Cell Acute Lymphoblastic Leukemia and Severe Combined Immunodeficiency, X-Linked. Among its related pathways are Transcriptional misregulation in cancer and Hematopoietic Stem Cell Differentiation. Gene Ontology (GO) annotations related to this gene include chromatin binding and RNA polymerase II regulatory…	Acts with TAL1/SCL to regulate red blood cell development. Also acts with LDB1 to maintain erythroid precursors in an immature state. RBTN2_HUMAN,P25791	17 20	30 40	34 44	13 19	LIM domain only 2	chr11:33892076-33858576	symbol	H. sapiens	protein-coding	LMO2 encodes a cysteine-rich, two LIM-domain protein that is required for yolk sac erythropoiesis. The LMO2 protein has a central and crucial role in hematopoietic development and is highly conserved. The LMO2 transcription start site is located approximately 25 kb downstream from the 11p13 T-cell translocation cluster (11p13 ttc), where a number T-cell acute lymphoblastic leukemia-specific trans…	GO:0097067 cellular response to thyroid hormone stimulus;GO:0097066 response to thyroid hormone;GO:1902036 regulation of hematopoietic stem cell differentiation	[GO:0008150] biological_process; [GO:0034641] cellular nitrogen compound metabolic process; [GO:0009058] biosynthetic process; [GO:0005575] cellular_component; [GO:0005622] intracellular; [GO:0043226] organelle; [GO:0005634] nucleus; [GO:0003674] molecular_function; [GO:0043167] ion binding; [GO:0005654] nucleoplasm; [GO:0030154] cell differentiation; [GO:0048856] anatomical structure development…	GO:0005667 transcription factor complex;GO:0005654 nucleoplasm;GO:0031981 nuclear lumen	GO:0043425 bHLH transcription factor binding;GO:0001102 RNA polymerase II activating transcription factor binding;GO:0001221 transcription cofactor binding		Predicted intracellular proteins; Disease related genes; Cancer-related genes	[IPR001781] Zinc finger, LIM-type	Nucleoplasm (reliability'])								MP:0005385 cardiovascular system phenotype; MP:0010768 mortality/aging; MP:0005384 cellular phenotype; MP:0005378 growth/size/body region phenotype; MP:0005387 immune system phenotype; MP:0002006 neoplasm; MP:0003631 nervous system phenotype; MP:0005397 hematopoietic system phenotype; MP:0005379 endocrine/exocrine gland phenotype; MP:0010771 integument phenotype; MP:0005380 embryo phenotype		OMIM ID:180385 Lim domain only 2		Interleukin-6;Monocytes;Parkinson Disease;Platelet Function Tests;gamma-Glutamyltransferase	Neuropsychological Tests;Vascular Calcification					Early T Acute Lymphoblastic Leukemia; WAGR Syndrome; High grade B-cell lymphoma; X-Linked Combined Immunodeficiency Diseases; Leukaemia recurrent; Disorder of tendon; Tendinopathy; Adult Lymphoblastic Lymphoma; Childhood Lymphoblastic Lymphoma; Precursor cell lymphoblastic lymphoma; Acute Undifferentiated Leukemia; Undifferentiated leukemia; Marginal Zone B-Cell Lymphoma; Teratocarcinoma; Cooley'…	86	135	[{"UniProt":"P25791","EnsemblGene":["ENSG00000135363"],"SwissProt":["RBTN2_HUMAN"]}]	blood	Distribution: Detected in all; Specificity: Low tissue specificity	antibody: Most of the normal tissues displayed moderate to strong cytoplasmic positivity. The liver was negative.; Nuclear expression in bone marrow and cytoplasmic expression in several tissues.	Antibody: Most cancer tissues showed weak to moderate cytoplasmic immunoreactivity. Most cases of gliomas, renal and skin cancers were negative.
1	MAFB	9935	DURS3|KRML|MCTO	The protein encoded by this gene is a basic leucine zipper (bZIP) transcription factor that plays an important role in the regulation of lineage-specific hematopoiesis. The encoded nuclear protein represses ETS1-mediated transcription of erythroid-specific genes in myeloid cells. This gene contains no introns. [provided by RefSeq, Jul 2008]	MAFB (MAF BZIP Transcription Factor B) is a Protein Coding gene. Diseases associated with MAFB include Multicentric Carpotarsal Osteolysis Syndrome and Duane Retraction Syndrome 3 With Or Without Deafness. Among its related pathways are Tacrolimus/Cyclosporine Pathway, Pharmacodynamics and Ectoderm Differentiation. Gene Ontology (GO) annotations related to this gene include DNA-binding transcript…	Acts as a transcriptional activator or repressor (PubMed:27181683). Plays a pivotal role in regulating lineage-specific hematopoiesis by repressing ETS1-mediated transcription of erythroid-specific genes in myeloid cells. Required for monocytic, macrophage, osteoclast, podocyte and islet beta cell differentiation. Involved in renal tubule survival and F4/80 maturation. Activates the insulin and g…	23 24	26 18	30 35	33 24	MAF bZIP transcription factor B	chr20:40689236-40685848	symbol	H. sapiens	protein-coding	The protein encoded by this gene is a basic leucine zipper (bZIP) transcription factor that plays an important role in the regulation of lineage-specific hematopoiesis. The encoded nuclear protein represses ETS1-mediated transcription of erythroid-specific genes in myeloid cells. This gene contains no introns. [provided by RefSeq, Jul 2008]	GO:0021572 rhombomere 6 development;GO:0021560 abducens nerve development;GO:0021598 abducens nerve morphogenesis	[GO:0003674] molecular_function; [GO:0003677] DNA binding; [GO:0008150] biological_process; [GO:0034641] cellular nitrogen compound metabolic process; [GO:0009058] biosynthetic process; [GO:0005575] cellular_component; [GO:0005622] intracellular; [GO:0043226] organelle; [GO:0005634] nucleus; [GO:0003700] DNA-binding transcription factor activity; [GO:0005694] chromosome; [GO:0000228] nuclear chro…	GO:0005667 transcription factor complex;GO:0000790 nuclear chromatin;GO:0000785 chromatin	GO:0001228 DNA-binding transcription activator activity, RNA polymerase II-specific;GO:0008134 transcription factor binding;GO:0000978 RNA polymerase II proximal promoter sequence-specific DNA binding		Transcription factors:Basic domains; Disease related genes; Cancer-related genes; Predicted intracellular proteins	[IPR004826] Basic leucine zipper domain, Maf-type; [IPR004827] Basic-leucine zipper domain; [IPR008917] Transcription factor, Skn-1-like, DNA-binding domain superfamily; [IPR013592] Maf transcription factor, N-terminal; [IPR024874] Transcription factor Maf family; [IPR028571] Transcription factor MafB	Nucleoplasm (reliability']); Additional: Cytosol;Golgi apparatus;Nucleoli						principal1		MP:0005367 renal/urinary system phenotype; MP:0005385 cardiovascular system phenotype; MP:0010768 mortality/aging; MP:0005376 homeostasis/metabolism phenotype; MP:0005384 cellular phenotype; MP:0005378 growth/size/body region phenotype; MP:0005386 behavior/neurological phenotype; MP:0005389 reproductive system phenotype; MP:0003631 nervous system phenotype; MP:0005377 hearing/vestibular/ear pheno…	[ORPHA:233] Duane retraction syndrome; [ORPHA:529574] Duane retraction syndrome with congenital deafness; [ORPHA:2774] Multicentric carpo-tarsal osteolysis with or without nephropathy	OMIM ID:608968 Maf bzip transcription factor b	Multicentric carpo-tarsal osteolysis with or without nephropathy; Carpal osteolysis; Duane retraction syndrome 3 with or without deafness; Duane syndrome type 1; Duane retraction syndrome 2; Duane syndrome type 3	Arteries;Body Mass Index;Chlorine;Cholesterol, HDL;Echocardiography;Lipids;Neuroblastoma;Platelet Function Tests	Cholesterol;Cholesterol, LDL;Cleft Lip;Cleft Palate;Cognition Disorders;Cognitive Dysfunction;Depressive Disorder;Dupuytren Contracture;Face;GRN protein, human;Homovanillic Acid;Hydroxyindoleacetic Acid;Immunoglobulins;Lipoproteins;Metabolism;Mouth Abnormalities;Nose;Schizophrenia;Serotonin Uptake Inhibitors;Stevens-Johnson Syndrome;Testosterone;Tumor Necrosis Factors;Viruses	[No disease mim] Duane Syndrome Aberrant Extraocular Muscle Innervation and Inner-Ear Defects; [166300] MULTICENTRIC CARPOTARSAL OSTEOLYSIS SYNDROME	Clinvar: phenotype not specified: likely pathogenic,pathogenic; Duane retraction syndrome 3 with or without deafness: pathogenic; Duane syndrome type 1: pathogenic; Duane syndrome type 3: pathogenic; Multicentric osteolysis nephropathy: pathogenic	HP:0000661:Palpebral fissure narrowing on adduction; HP:0001473:Metatarsal osteolysis; HP:0001225:Wrist swelling; HP:0001504:Metacarpal osteolysis; HP:0000542:Impaired ocular adduction; HP:0011365:Patchy hypopigmentation of hair; HP:0001495:Carpal osteolysis; HP:0006234:Osteolysis involving tarsal bones; HP:0000634:Impaired ocular abduction; HP:0001785:Ankle swelling; HP:0007818:Central heterochr…		DUANE RETRACTION SYNDROME 3; DUANE RETRACTION SYNDROME 3 WITH OR WITHOUT DEAFNESS; Osteolysis, Hereditary, Of Carpal Bones With Or Without Nephropathy; Impaired ocular adduction; Metacarpal osteolysis; Metatarsal osteolysis; Palpebral fissure narrowing on adduction; Wrist swelling; Carpal osteolysis; Duane Retraction Syndrome, Type 2; Duane Retraction Syndrome, Type 3; Impaired ocular abduction; …	54	89	[{"UniProt":"Q9Y5Q3","EnsemblGene":["ENSG00000204103"],"EnsemblTrans":[["ENST00000373313","ENSP00000362410","principal1"]],"RefSeq":[["NM_005461","NP_005452","REVIEWED"]],"UCSC":["uc002xji.4"],"SwissProt":["MAFB_HUMAN"]}]	pancreas	Distribution: Detected in all; Specificity: Tissue enhanced	Nuclear expression mainly in parathyroid gland, thyroid gland, kidney, hematopoietic cells, macrophages in lymphoid germinal centers.; antibody: The majority of normal tissues showed weak to moderate nuclear positivity, in several cases combined with cytoplasmic staining. Strong nuclear staining was observed in endocrine glands, renal glomeruli and cells in seminiferus ducts. Gastric chief cells …	Antibody: Several malignant gliomas, skin, testicular, cervical and breast cancers displayed moderate nuclear and/or cytoplasmic immunoreactivity. Malignant cells in general were weakly stained or negative.
1	MET	4233	AUTS9|DFNB97|HGFR|RCCP2|c-Met	This gene encodes a member of the receptor tyrosine kinase family of proteins and the product of the proto-oncogene MET. The encoded preproprotein is proteolytically processed to generate alpha and beta subunits that are linked via disulfide bonds to form the mature receptor. Further processing of the beta subunit results in the formation of the M10 peptide, which has been shown to reduce lung fi…	MET (MET Proto-Oncogene, Receptor Tyrosine Kinase) is a Protein Coding gene. Diseases associated with MET include Renal Cell Carcinoma, Papillary, 1 and Deafness, Autosomal Recessive 97. Among its related pathways are Transcriptional misregulation in cancer and RET signaling. Gene Ontology (GO) annotations related to this gene include transferase activity, transferring phosphorus-containing group…	Receptor tyrosine kinase that transduces signals from the extracellular matrix into the cytoplasm by binding to hepatocyte growth factor/HGF ligand. Regulates many physiological processes including proliferation, scattering, morphogenesis and survival. Ligand binding at the cell surface induces autophosphorylation of MET on its intracellular domain that provides docking sites for downstream signa…	15 18	21 21	26 38	27 29	MET proto-oncogene, receptor tyrosine kinase	chr7:116672196-116798386	symbol	H. sapiens	protein-coding	This gene encodes a member of the receptor tyrosine kinase family of proteins and the product of the proto-oncogene MET. The encoded preproprotein is proteolytically processed to generate alpha and beta subunits that are linked via disulfide bonds to form the mature receptor. Further processing of the beta subunit results in the formation of the M10 peptide, which has been shown to reduce lung fi…	GO:0070494 regulation of thrombin-activated receptor signaling pathway;GO:0070495 negative regulation of thrombin-activated receptor signaling pathway;GO:1905098 negative regulation of guanyl-nucleotide exchange factor activity	[GO:0003674] molecular_function; [GO:0007165] signal transduction; [GO:0008150] biological_process; [GO:0005575] cellular_component; [GO:0043167] ion binding; [GO:0006464] cellular protein modification process; [GO:0016301] kinase activity; [GO:0034641] cellular nitrogen compound metabolic process; [GO:0009058] biosynthetic process; [GO:0006950] response to stress; [GO:0008219] cell death; [GO:00…	GO:0009925 basal plasma membrane;GO:0045178 basal part of cell;GO:0016323 basolateral plasma membrane	GO:0005008 hepatocyte growth factor-activated receptor activity;GO:0017154 semaphorin receptor activity;GO:0004714 transmembrane receptor protein tyrosine kinase activity	Tyr protein kinase family	Predicted intracellular proteins; FDA approved drug targets:Small molecule drugs; Disease related genes; Cancer-related genes:Candidate cancer biomarkers; Predicted secreted proteins; Enzymes; Kinases:Tyr protein kinases; ENZYME proteins:Transferases; RAS pathway related proteins; Cancer-related genes:Mutated cancer genes	[IPR001627] Sema domain; [IPR015943] WD40/YVTN repeat-like-containing domain superfamily; [IPR031148] Plexin family; [IPR036352] Sema domain superfamily; [IPR000719] Protein kinase domain; [IPR001245] Serine-threonine/tyrosine-protein kinase, catalytic domain; [IPR002165] Plexin repeat; [IPR002909] IPT domain; [IPR008266] Tyrosine-protein kinase, active site; [IPR011009] Protein kinase-like domai…	Cytosol;Plasma membrane (reliability'])	yes	yes	yes	yes	yes		yes	MP:0005367 renal/urinary system phenotype; MP:0005370 liver/biliary system phenotype; MP:0005385 cardiovascular system phenotype; MP:0010768 mortality/aging; MP:0005369 muscle phenotype; MP:0005376 homeostasis/metabolism phenotype; MP:0005384 cellular phenotype; MP:0005378 growth/size/body region phenotype; MP:0005386 behavior/neurological phenotype; MP:0005381 digestive/alimentary phenotype; MP:…	[ORPHA:90636] Autosomal recessive non-syndromic sensorineural deafness type DFNB; [ORPHA:47044] Hereditary papillary renal cell carcinoma; [ORPHA:488265] Osteofibrous dysplasia; [ORPHA:319298] Papillary renal cell carcinoma; [ORPHA:33402] Pediatric hepatocellular carcinoma; [ORPHA:357191] Selection of therapeutic option in non-small cell lung carcinoma; [ORPHA:106] NON RARE IN EUROPE: Autism	OMIM ID:164860 Met protooncogene	Carcinoma; Neoplasm; Kidney Carcinoma; Hereditary cancer-predisposing syndrome; Renal cell carcinoma, papillary, 1; Deafness, autosomal recessive 97; Nonsyndromic Hearing Loss and Deafness, Autosomal Recessive; Childhood hepatocellular carcinoma	Hip;Platelet Function Tests	Electrocardiography;Heart Rate;Hematocrit;Multiple Sclerosis;Triglycerides;Trypanosoma cruzi			HP:0005864:Pseudoarthrosis; HP:0002605:Hepatic necrosis; HP:0410019:Epigastric pain; HP:0006766:Papillary renal cell carcinoma; HP:0030242:Portal vein thrombosis; HP:0006572:Subacute progressive viral hepatitis; HP:0006254:Elevated alpha-fetoprotein; HP:0001413:Micronodular cirrhosis; HP:0003038:Fibular hypoplasia; HP:0001402:Hepatocellular carcinoma; HP:0001395:Hepatic fibrosis; HP:0003829:Incom…	K-252a; SGX-523; 1-(4-fluorophenyl)-N-[3-fluoro-4-(1H-pyrrolo[2,3-b]pyridin-4-yloxy)phenyl]-2-oxo-1,2-dihydropyridine-3-carboxamide; N-({4-[(2-aminopyridin-4-yl)oxy]-3-fluorophenyl}carbamoyl)-2-(4-fluorophenyl)acetamide; 2-(4-fluorophenyl)-N-{[3-fluoro-4-(1H-pyrrolo[2,3-b]pyridin-4-yloxy)phenyl]carbamoyl}acetamide; N-(3-chlorophenyl)-N-methyl-2-oxo-3-[(3,4,5-trimethyl-1H-pyrrol-2-yl)methyl]-2H-in…	Advanced Cervical Carcinoma; Chest--Tumors; DEAFNESS, AUTOSOMAL RECESSIVE 97; Malignant syndrome NOS; Papillary renal cell carcinoma, familial; Stage IB Non-Small Cell Lung Carcinoma AJCC v7; Tibia, Bowing of, with Pseudarthrosis and Pectus Excavatum; stage IB non-small cell lung cancer; OSTEOFIBROUS DYSPLASIA, SUSCEPTIBILITY TO; Hepatic Necrosis, CTCAE 3.0; Hepatic Necrosis, CTCAE 5.0; Type 1 Pa…	1111	1236	[{"UniProt":"P08581","EnsemblGene":["ENSG00000105976"],"SwissProt":["MET_HUMAN"]},{"UniProt":"A0A024R728","RefSeq":[["NM_001127500","NP_001120972","REVIEWED"]],"SwissProt":["A0A024R728_HUMAN"]},{"UniProt":"A0A024R759","RefSeq":[["NM_000245","NP_000236","REVIEWED"]],"SwissProt":["A0A024R759_HUMAN"]},{"UniProt":"B4DLF5","RefSeq":[["NM_001324402","NP_001311331","REVIEWED"],["XM_006715990","XP_006716…		Distribution: Detected in many; Specificity: Low tissue specificity	antibody: Most normal tissues displayed moderate cytoplasmic immunoreactivity, often accompanied with membranous staining. Keratinized layers of squamous epithelia were strongly stained. Strong staining was also found in neuronal cells.; Cytoplasmic and membranous expression of varying levels in most tissues.	Antibody: Most cancer tissues displayed moderate to strong cytoplasmic immunoreactivity. Strongest staining was observed in colorectal cancers.
1	MUC1	4582	ADMCKD|ADMCKD1|CD227|EMA|H23AG|KL-6|MAM6|MCD|MCKD|MCKD1|MUC-1|MUC-1/SEC|MUC-1/X|MUC1/ZD|PEM|PEMT|PUM	This gene encodes a membrane-bound protein that is a member of the mucin family. Mucins are O-glycosylated proteins that play an essential role in forming protective mucous barriers on epithelial surfaces. These proteins also play a role in intracellular signaling. This protein is expressed on the apical surface of epithelial cells that line the mucosal surfaces of many different tissues includin…	MUC1 (Mucin 1, Cell Surface Associated) is a Protein Coding gene. Diseases associated with MUC1 include Medullary Cystic Kidney Disease 1 and Syringoma. Among its related pathways are Defective C1GALT1C1 causes Tn polyagglutination syndrome (TNPS) and Cell adhesion_Cell-matrix glycoconjugates. Gene Ontology (GO) annotations related to this gene include RNA polymerase II proximal promoter sequence…	The alpha subunit has cell adhesive properties. Can act both as an adhesion and an anti-adhesion protein. May provide a protective layer on epithelial cells against bacterial and enzyme attack. MUC1_HUMAN,P15941 The beta subunit contains a C-terminal domain which is involved in cell signaling, through phosphorylations and protein-protein interactions. Modulates signaling in ERK, SRC and NF-kappa-…	15 9	8 6	121 146	9 8	mucin 1, cell surface associated	chr1:155192915-155185824	symbol	H. sapiens	protein-coding	This gene encodes a membrane-bound protein that is a member of the mucin family. Mucins are O-glycosylated proteins that play an essential role in forming protective mucous barriers on epithelial surfaces. These proteins also play a role in intracellular signaling. This protein is expressed on the apical surface of epithelial cells that line the mucosal surfaces of many different tissues includin…	GO:0090240 positive regulation of histone H4 acetylation;GO:0010944 negative regulation of transcription by competitive promoter binding;GO:0033629 negative regulation of cell adhesion mediated by integrin	[GO:0005575] cellular_component; [GO:0005622] intracellular; [GO:0043226] organelle; [GO:0005634] nucleus; [GO:0005737] cytoplasm; [GO:0005886] plasma membrane; [GO:0005576] extracellular region; [GO:0005615] extracellular space; [GO:0003674] molecular_function; [GO:0007165] signal transduction; [GO:0008150] biological_process; [GO:0006950] response to stress; [GO:0002376] immune system process; …	GO:0005796 Golgi lumen;GO:0016324 apical plasma membrane;GO:0045177 apical part of cell	GO:0002039 p53 binding;GO:0003712 transcription coregulator activity;GO:0000978 RNA polymerase II proximal promoter sequence-specific DNA binding		CD markers; Predicted intracellular proteins; Disease related genes; Cancer-related genes:Candidate cancer biomarkers; Predicted secreted proteins	[IPR000082] SEA domain; [IPR036364] SEA domain superfamily	Plasma membrane (reliability'])	yes	yes	yes	yes		alternative2	yes	MP:0005370 liver/biliary system phenotype; MP:0005376 homeostasis/metabolism phenotype; MP:0005381 digestive/alimentary phenotype; MP:0002006 neoplasm	[ORPHA:88949] MUC1-related autosomal dominant tubulointerstitial kidney disease	OMIM ID:158340 Mucin 1, cell surface associated		Gastrointestinal Neoplasms	Magnesium;Stomach Neoplasms;Urine			HP:0002048:Renal cortical atrophy; HP:0004732:Impaired renal uric acid clearance; HP:0005583:Tubular basement membrane disintegration; HP:0000108:Renal corticomedullary cysts; HP:0012213:Decreased glomerular filtration rate; HP:0005576:Tubulointerstitial fibrosis; HP:0000092:Tubular atrophy; HP:0001970:Tubulointerstitial nephritis; HP:0001997:Gout; HP:0000127:Renal salt wasting; HP:0003259:Elevat…	TG4010	Impaired renal uric acid clearance; Low Grade Malignant Neoplasm; Pulmonary leukostasis; Renal cortical atrophy; Hereditary nephropathy; Ileoanal Pouches; Ovarian cancer, disseminated; Rhinitis, Vasomotor; Solid carcinoma; Tuberculosis, Oral; Chronic obstructive pulmonary disease exacerbation; Cystic fibrosis with meconium ileus; Interstitial Disease; Malonic aciduria; Postoperative peritoneal ad…	738	820	[{"UniProt":"A0A087X2A4","EnsemblGene":["ENSG00000185499"],"EnsemblTrans":[["ENST00000612778","ENSP00000484824","alternative2"]],"RefSeq":[["NM_001204286","NP_001191215","REVIEWED"]],"UCSC":["uc057lmt.1"],"SwissProt":["A0A087X2A4_HUMAN"]},{"UniProt":"A0A0C4DGW3","EnsemblGene":["ENSG00000185499"],"EnsemblTrans":[["ENST00000620103","ENSP00000481231","alternative2"]],"RefSeq":[["NM_001204285","NP_00…	stomach	Distribution: Detected in many; Specificity: Tissue enhanced	Cytoplasmic and membranous expression mainly in glandular cells and respiratory epithelial cells.; antibody: Strong cytoplasmic and membranous positivity in a majority of glandular epithelial cells. Liver, CNS, mesenchymal and inflammatory cells were negative.	Antibody: Strong cytoplasmic or membranous staining in most adenocarcinomas. Most prostate, liver, carcinoids and squamous carcinomas were negative as well as all gliomas, lymphomas, melanomas.
1	NCOA4	8031	ARA70|ELE1|PTC3|RFG	This gene encodes an androgen receptor coactivator. The encoded protein interacts with the androgen receptor in a ligand-dependent manner to enhance its transcriptional activity. Chromosomal translocations between this gene and the ret tyrosine kinase gene, also located on chromosome 10, have been associated with papillary thyroid carcinoma. Alternatively spliced transcript variants have been des…	NCOA4 (Nuclear Receptor Coactivator 4) is a Protein Coding gene. Diseases associated with NCOA4 include Differentiated Thyroid Carcinoma and Thyroid Carcinoma. Among its related pathways are Endometrial cancer and Androgen receptor signaling pathway. Gene Ontology (GO) annotations related to this gene include transcription coactivator activity and androgen receptor binding.	Enhances the androgen receptor transcriptional activity in prostate cancer cells. Ligand-independent coactivator of the peroxisome proliferator-activated receptor (PPAR) gamma. NCOA4_HUMAN,Q13772	66 107	64 76	53 82	68 95	nuclear receptor coactivator 4	chr10:46030623-46005088	symbol	H. sapiens	protein-coding	This gene encodes an androgen receptor coactivator. The encoded protein interacts with the androgen receptor in a ligand-dependent manner to enhance its transcriptional activity. Chromosomal translocations between this gene and the ret tyrosine kinase gene, also located on chromosome 10, have been associated with papillary thyroid carcinoma. Alternatively spliced transcript variants have been des…	GO:0071394 cellular response to testosterone stimulus;GO:0071391 cellular response to estrogen stimulus;GO:0006622 protein targeting to lysosome	[GO:0008150] biological_process; [GO:0042592] homeostatic process; [GO:0003674] molecular_function; [GO:0034641] cellular nitrogen compound metabolic process; [GO:0009058] biosynthetic process; [GO:0005575] cellular_component; [GO:0005622] intracellular; [GO:0043226] organelle; [GO:0005634] nucleus; [GO:0000003] reproduction; [GO:0048856] anatomical structure development; [GO:0005773] vacuole; [G…	GO:0044754 autolysosome;GO:0005767 secondary lysosome;GO:0005776 autophagosome	GO:0003713 transcription coactivator activity;GO:0003712 transcription coregulator activity;GO:0140110 transcription regulator activity		Disease related genes; Cancer-related genes:Mutational cancer driver genes; Predicted intracellular proteins	[IPR022174] Nuclear coactivator; [IPR039947] Nuclear receptor coactivator 4	Nucleoli (reliability']); Additional: Cytosol;Golgi apparatus								MP:0005376 homeostasis/metabolism phenotype; MP:0005384 cellular phenotype	[ORPHA:146] Differentiated thyroid carcinoma	OMIM ID:601984 Nuclear receptor coactivator 4			Erythrocyte Count;Erythrocyte Indices					Struma Ovarii; Mammary Analogue Secretory Carcinoma; Spindle Cell Neoplasm; Mixed follicular and papillary thyroid carcinoma; Follicular Variant Thyroid Gland Papillary Carcinoma; Salivary duct carcinoma; Multiple Endocrine Neoplasia Type 2a; Substance Withdrawal Syndrome; Alopecia, Male Pattern; Androgenetic Alopecia; Thyroid Nodule; Autoimmune thyroiditis; androgen independent prostate cancer; …	38	82	[{"UniProt":"Q13772","EnsemblGene":["ENSG00000266412"],"SwissProt":["NCOA4_HUMAN"]},{"UniProt":"A0A024QZI5","RefSeq":[["NM_001145262","NP_001138734","REVIEWED"],["NM_001145263","NP_001138735","REVIEWED"],["NM_005437","NP_005428","REVIEWED"]],"SwissProt":["A0A024QZI5_HUMAN"]},{"UniProt":"B2R5V0","RefSeq":[["NM_001145263","NP_001138735","REVIEWED"]],"SwissProt":["B2R5V0_HUMAN"]},{"UniProt":"Q96E88"…		Distribution: Detected in all; Specificity: Tissue enhanced	Cytoplasmic expression in several tissues.
1	NFE2L2	4780	HEBP1|IMDDHH|NRF2|Nrf-2	This gene encodes a transcription factor which is a member of a small family of basic leucine zipper (bZIP) proteins. The encoded transcription factor regulates genes which contain antioxidant response elements (ARE) in their promoters; many of these genes encode proteins involved in response to injury and inflammation which includes the production of free radicals. Multiple transcript variants e…	NFE2L2 (Nuclear Factor, Erythroid 2 Like 2) is a Protein Coding gene. Diseases associated with NFE2L2 include Immunodeficiency, Developmental Delay, And Hypohomocysteinemia and Lung Squamous Cell Carcinoma. Among its related pathways are Simplified Interaction Map Between LOXL4 and Oxidative Stress Pathway and Photodynamic therapy-induced NFE2L2 (NRF2) survival signaling. Gene Ontology (GO) annot…	Transcription factor that plays a key role in the response to oxidative stress: binds to antioxidant response (ARE) elements present in the promoter region of many cytoprotective genes, such as phase 2 detoxifying enzymes, and promotes their expression, thereby neutralizing reactive electrophiles (PubMed:11035812, PubMed:19489739, PubMed:29018201, PubMed:31398338). In normal conditions, ubiquitin…	42 55	37 67	48 83	37 55	nuclear factor, erythroid 2 like 2	chr2:177265131-177230303	symbol	H. sapiens	protein-coding	This gene encodes a transcription factor which is a member of a small family of basic leucine zipper (bZIP) proteins. The encoded transcription factor regulates genes which contain antioxidant response elements (ARE) in their promoters; many of these genes encode proteins involved in response to injury and inflammation which includes the production of free radicals. Multiple transcript variants e…	GO:1903788 positive regulation of glutathione biosynthetic process;GO:0043387 mycotoxin catabolic process;GO:0046223 aflatoxin catabolic process	[GO:0003674] molecular_function; [GO:0003677] DNA binding; [GO:0008150] biological_process; [GO:0034641] cellular nitrogen compound metabolic process; [GO:0009058] biosynthetic process; [GO:0005575] cellular_component; [GO:0005622] intracellular; [GO:0043226] organelle; [GO:0005634] nucleus; [GO:0005737] cytoplasm; [GO:0003700] DNA-binding transcription factor activity; [GO:0006950] response to s…	GO:0032993 protein-DNA complex;GO:0005813 centrosome;GO:0005815 microtubule organizing center	GO:0001102 RNA polymerase II activating transcription factor binding;GO:0001221 transcription cofactor binding;GO:0033613 activating transcription factor binding		Transcription factors:Basic domains; Cancer-related genes:Mutational cancer driver genes; Predicted intracellular proteins; Cancer-related genes:Mutated cancer genes	[IPR004826] Basic leucine zipper domain, Maf-type; [IPR004827] Basic-leucine zipper domain; [IPR008917] Transcription factor, Skn-1-like, DNA-binding domain superfamily; [IPR029845] Nuclear factor erythroid 2-related factor 2	Nucleoplasm;Plasma membrane (reliability']); Additional: Cytosol								MP:0005367 renal/urinary system phenotype; MP:0005370 liver/biliary system phenotype; MP:0005385 cardiovascular system phenotype; MP:0010768 mortality/aging; MP:0005376 homeostasis/metabolism phenotype; MP:0005384 cellular phenotype; MP:0005378 growth/size/body region phenotype; MP:0005386 behavior/neurological phenotype; MP:0005381 digestive/alimentary phenotype; MP:0005387 immune system phenoty…		OMIM ID:600492 Nuclear factor erythroid 2-like 2	Colorectal cancer; IMMUNODEFICIENCY, DEVELOPMENTAL DELAY, AND HYPOHOMOCYSTEINEMIA; Lung adenocarcinoma; Squamous cell lung carcinoma; Uterine cervical neoplasms; Transitional cell carcinoma of the bladder; Squamous cell carcinoma of the head and neck; Hepatocellular carcinoma; Malignant neoplasm of body of uterus; Renal cell carcinoma, papillary, 1				Colorectal cancer: likely pathogenic,pathogenic; Hepatocellular carcinoma: likely pathogenic,pathogenic; Immunodeficiency, developmental delay, and hypohomocysteinemia: likely pathogenic,pathogenic; Lung adenocarcinoma: likely pathogenic,pathogenic; Malignant neoplasm of body of uterus: likely pathogenic; Renal cell carcinoma, papillary, 1: likely pathogenic; Squamous cell carcinoma of the head a…	HP:0001581:Recurrent skin infections; HP:0004313:Decreased antibody level in blood; HP:0002352:Leukoencephalopathy; HP:0002721:Immunodeficiency; HP:0001256:Intellectual disability, mild; HP:0001631:Atrial septal defect; HP:0002205:Recurrent respiratory infections; HP:0003593:Infantile onset; HP:0000750:Delayed speech and language development; HP:0001508:Failure to thrive; HP:0004322:Short stature…		IMMUNODEFICIENCY, DEVELOPMENTAL DELAY, AND HYPOHOMOCYSTEINEMIA; Low Cardiac Output; Low Cardiac Output Syndrome; Parotid Gland Adenocarcinoma; Pediatric respiratory diseases; Dilated left ventricle; Acute alcoholism; Keratoma; Keratosis Blennorrhagica; Bilateral hydronephrosis; Fetal Mummification; Hypergonadotropic Ovarian Failure, X-Linked; Methamphetamine intoxication; Papillary renal cell car…	1187	1308	[{"UniProt":"Q16236","EnsemblGene":["ENSG00000116044"],"SwissProt":["NF2L2_HUMAN"]}]	kidney	Distribution: Detected in all; Specificity: Low tissue specificity	Ubiquitous nuclear and cytoplasmic expression.; antibody: Most normal cells showed moderate to strong cytoplasmic positivity.	Antibody: Most cancers showed moderate to strong cytoplasmic positivity.
1	NRAS	4893	ALPS4|CMNS|N-ras|NCMS|NRAS1|NS6	This is an N-ras oncogene encoding a membrane protein that shuttles between the Golgi apparatus and the plasma membrane. This shuttling is regulated through palmitoylation and depalmitoylation by the ZDHHC9-GOLGA7 complex. The encoded protein, which has intrinsic GTPase activity, is activated by a guanine nucleotide-exchange factor and inactivated by a GTPase activating protein. Mutations in this…	NRAS (NRAS Proto-Oncogene, GTPase) is a Protein Coding gene. Diseases associated with NRAS include Ras-Associated Autoimmune Leukoproliferative Disorder and Melanocytic Nevus Syndrome, Congenital. Among its related pathways are Negative regulation of MAPK pathway and NGF Pathway. Gene Ontology (GO) annotations related to this gene include GTP binding. An important paralog of this gene is KRAS.	Ras proteins bind GDP/GTP and possess intrinsic GTPase activity. RASN_HUMAN,P01111	18 23	18 15	28 40	23 29	NRAS proto-oncogene, GTPase	chr1:114716771-114704469	symbol	H. sapiens	protein-coding	This is an N-ras oncogene encoding a membrane protein that shuttles between the Golgi apparatus and the plasma membrane. This shuttling is regulated through palmitoylation and depalmitoylation by the ZDHHC9-GOLGA7 complex. The encoded protein, which has intrinsic GTPase activity, is activated by a guanine nucleotide-exchange factor and inactivated by a GTPase activating protein. Mutations in this…	GO:0001938 positive regulation of endothelial cell proliferation;GO:0002223 stimulatory C-type lectin receptor signaling pathway;GO:0002220 innate immune response activating cell surface receptor signaling pathway	[GO:0007165] signal transduction; [GO:0008150] biological_process; [GO:0005575] cellular_component; [GO:0003674] molecular_function; [GO:0043167] ion binding; [GO:0003924] GTPase activity; [GO:0005886] plasma membrane; [GO:0005737] cytoplasm; [GO:0005622] intracellular; [GO:0043226] organelle; [GO:0005794] Golgi apparatus; [GO:0005576] extracellular region; [GO:0005615] extracellular space; [GO:0…	GO:0070821 tertiary granule membrane;GO:0070820 tertiary granule;GO:0030667 secretory granule membrane	GO:0019003 GDP binding;GO:0003924 GTPase activity;GO:0005525 GTP binding		Predicted intracellular proteins; Disease related genes; Cancer-related genes:Mutational cancer driver genes; RAS pathway related proteins; Cancer-related genes:Mutated cancer genes	[IPR001806] Small GTPase; [IPR005225] Small GTP-binding protein domain; [IPR020849] Small GTPase superfamily, Ras-type; [IPR027417] P-loop containing nucleoside triphosphate hydrolase							principal1		MP:0005370 liver/biliary system phenotype; MP:0010768 mortality/aging; MP:0005376 homeostasis/metabolism phenotype; MP:0005384 cellular phenotype; MP:0005378 growth/size/body region phenotype; MP:0005386 behavior/neurological phenotype; MP:0005387 immune system phenotype; MP:0002006 neoplasm; MP:0005390 skeleton phenotype; MP:0005397 hematopoietic system phenotype; MP:0005379 endocrine/exocrine g…	[ORPHA:146] Differentiated thyroid carcinoma; [ORPHA:86834] Juvenile myelomonocytic leukemia; [ORPHA:626] Large congenital melanocytic nevus; [ORPHA:2612] Linear nevus sebaceus syndrome; [ORPHA:648] Noonan Syndrome; [ORPHA:268114] RAS-associated autoimmune leukoproliferative disease; [ORPHA:357194] Selection of therapeutic option in colorectal cancer; [ORPHA:544260] Selection of therapeutic optio…	OMIM ID:164790 Nras protooncogene, gtpase	Anemia; Neoplasm of stomach; Cutaneous melanoma; Acute myeloid leukemia; Transitional cell carcinoma of the bladder; Malignant melanoma of skin; Non-Hodgkin lymphoma; Myelodysplastic syndrome; Multiple myeloma; Adenocarcinoma of stomach; Neoplasm; Medulloblastoma; Neoplasm of the large intestine; Chronic lymphocytic leukemia; Hepatocellular carcinoma; Malignant neoplasm of body of uterus; Nasopha…		Autistic Disorder	[613224] Noonan syndrome type 6	Acute myeloid leukemia: drug response,likely pathogenic,not provided,pathogenic,uncertain significance; Adenocarcinoma of stomach: drug response,likely pathogenic,not provided,pathogenic,uncertain significance; Adrenocortical carcinoma: drug response,likely pathogenic,not provided,pathogenic,uncertain significance; Carcinoma of colon: likely pathogenic,pathogenic; Chronic lymphocytic leukemia: dr…	HP:0005603:Numerous congenital melanocytic nevi; HP:0025510:Nevus spilus; HP:0200022:Choroid plexus papilloma; HP:0010817:Linear nevus sebaceous; HP:0010815:Nevus sebaceous; HP:0005600:Congenital giant melanocytic nevus; HP:0004523:Long eyebrows; HP:0010759:Prominence of the premaxilla; HP:0002731:Decreased lymphocyte apoptosis; HP:0001780:Abnormality of toe; HP:0012209:Juvenile myelomonocytic le…		Leukemia, Experimental; Malignant melanoma of rectum; Melanomatosis; NEUROCUTANEOUS MELANOSIS, SOMATIC; Neurocutaneous melanosis; Numerous congenital melanocytic nevi; Spondylocostal Dysostosis with Anal Atresia and Urogenital Anomalies; childhood acute myeloid leukemia/other myeloid malignancies; Central nervous system melanoma; Dermatitis acneiform; Genitourinary dysplasia; Long eyebrows; Nevus…	444	545	[{"UniProt":"P01111","EnsemblGene":["ENSG00000213281"],"EnsemblTrans":[["ENST00000369535","ENSP00000358548","principal1"]],"RefSeq":[["NM_002524","NP_002515","REVIEWED"]],"SwissProt":["RASN_HUMAN"]},{"UniProt":"Q5U091","RefSeq":[["NM_002524","NP_002515","REVIEWED"]],"UCSC":["uc009wgu.4"],"SwissProt":["Q5U091_HUMAN"]}]		Distribution: Detected in all; Specificity: Low tissue specificity	antibody: Most normal tissues displayed moderate cytoplasmic positivity. Strong staining was observed in exocrine pancreas, purkinje cells and placental trophoblastic cells.; Cytoplasmic and membranous expression in several tissues.	Antibody: Cancer cells showed moderate cytoplasmic immunoreactivity. The majority of colorectal cancers and several lymphomas, pancreatic and endometrial cancers were strongly stained.
1	NTRK1	4914	MTC|TRK|TRK1|TRKA|Trk-A|p140-TrkA	This gene encodes a member of the neurotrophic tyrosine kinase receptor (NTKR) family. This kinase is a membrane-bound receptor that, upon neurotrophin binding, phosphorylates itself and members of the MAPK pathway. The presence of this kinase leads to cell differentiation and may play a role in specifying sensory neuron subtypes. Mutations in this gene have been associated with congenital insens…	NTRK1 (Neurotrophic Receptor Tyrosine Kinase 1) is a Protein Coding gene. Diseases associated with NTRK1 include Insensitivity To Pain, Congenital, With Anhidrosis and Thyroid Carcinoma, Familial Medullary. Among its related pathways are Neuroscience and Transcriptional misregulation in cancer. Gene Ontology (GO) annotations related to this gene include protein homodimerization activity and prote…	Receptor tyrosine kinase involved in the development and the maturation of the central and peripheral nervous systems through regulation of proliferation, differentiation and survival of sympathetic and nervous neurons. High affinity receptor for NGF which is its primary ligand (PubMed:1850821, PubMed:1849459, PubMed:1281417, PubMed:8325889, PubMed:15488758, PubMed:22649032, PubMed:17196528, PubM…	10 4	5 4	15 6	3 0.83	neurotrophic receptor tyrosine kinase 1	chr1:156815750-156881850	symbol	H. sapiens	protein-coding	This gene encodes a member of the neurotrophic tyrosine kinase receptor (NTKR) family. This kinase is a membrane-bound receptor that, upon neurotrophin binding, phosphorylates itself and members of the MAPK pathway. The presence of this kinase leads to cell differentiation and may play a role in specifying sensory neuron subtypes. Mutations in this gene have been associated with congenital insens…	GO:0061366 behavioral response to chemical pain;GO:0061368 behavioral response to formalin induced pain;GO:0021553 olfactory nerve development	[GO:0003674] molecular_function; [GO:0043167] ion binding; [GO:0005575] cellular_component; [GO:0008150] biological_process; [GO:0006464] cellular protein modification process; [GO:0005886] plasma membrane; [GO:0016301] kinase activity; [GO:0007165] signal transduction; [GO:0008219] cell death; [GO:0005737] cytoplasm; [GO:0005622] intracellular; [GO:0043226] organelle; [GO:0031410] cytoplasmic ve…	GO:0055038 recycling endosome membrane;GO:0031902 late endosome membrane;GO:0031901 early endosome membrane	GO:0005166 neurotrophin p75 receptor binding;GO:0010465 nerve growth factor receptor activity;GO:0005030 neurotrophin receptor activity	Tyr protein kinase family	FDA approved drug targets:Small molecule drugs; Disease related genes; Cancer-related genes:Candidate cancer biomarkers; Enzymes; Kinases:Tyr protein kinases; ENZYME proteins:Transferases; RAS pathway related proteins	[IPR000483] Cysteine-rich flanking region, C-terminal; [IPR000719] Protein kinase domain; [IPR001245] Serine-threonine/tyrosine-protein kinase, catalytic domain; [IPR001611] Leucine-rich repeat; [IPR002011] Tyrosine-protein kinase, receptor class II, conserved site; [IPR007110] Immunoglobulin-like domain; [IPR008266] Tyrosine-protein kinase, active site; [IPR011009] Protein kinase-like domain sup…	Cytosol;Vesicles (reliability'])			yes	yes			yes	MP:0010768 mortality/aging; MP:0005369 muscle phenotype; MP:0005378 growth/size/body region phenotype; MP:0005386 behavior/neurological phenotype; MP:0005387 immune system phenotype; MP:0003631 nervous system phenotype; MP:0005391 vision/eye phenotype; MP:0005371 limbs/digits/tail phenotype; MP:0005397 hematopoietic system phenotype; MP:0010771 integument phenotype; MP:0001186 pigmentation phenot…	[ORPHA:146] Differentiated thyroid carcinoma; [ORPHA:99361] Familial medullary thyroid carcinoma; [ORPHA:642] Hereditary sensory and autonomic neuropathy type 4; [ORPHA:64752] Hereditary sensory and autonomic neuropathy type 5	OMIM ID:191315 Neurotrophic tyrosine kinase, receptor, type 1	Hereditary insensitivity to pain with anhidrosis; Absent speech; Global developmental delay; Epileptic encephalopathy; Developmental regression; Muscular hypotonia; Abnormality of the cerebral white matter; Charcot-Marie-Tooth disease; Inborn genetic diseases	Platelet Function Tests	Polychlorinated Biphenyls;Uric Acid	[256800] Congenital insensitivity to pain with anhidrosis	Clinvar: phenotype not specified: likely pathogenic,pathogenic; Hereditary insensitivity to pain with anhidrosis: likely pathogenic,pathogenic; Inborn genetic diseases: likely pathogenic,pathogenic	HP:0007249:Decreased number of small peripheral myelinated nerve fibers; HP:0005307:Postural hypotension with compensatory tachycardia; HP:0002821:Neuropathic arthropathy; HP:0002865:Medullary thyroid carcinoma; HP:0012804:Corneal ulceration; HP:0010829:Impaired temperature sensation; HP:0002661:Painless fractures due to injury; HP:0006121:Acral ulceration; HP:0007460:Autoamputation of digits; HP…	Amitriptyline; Imatinib; Regorafenib; Entrectinib; Fostamatinib; Cenegermin; Larotrectinib	Decreased number of small peripheral myelinated nerve fibers; Stenosis, Pulmonary Vein; Fibrous Hamartoma of Infancy; Fish Melanoma; Hyperplastic gingivitis; Mucosal neuromas; Postural hypotension with compensatory tachycardia; Congenital hemangioma; Hereditary Sensory Radicular Neuropathy; Myofascial Pain Syndromes; Palmar hyperkeratosis; Sarcoma, metastatic; Hereditary Sensory Autonomic Neuropa…	235	364	[{"UniProt":"P04629","EnsemblGene":["ENSG00000198400"],"SwissProt":["NTRK1_HUMAN"]},{"UniProt":"X5DR71","RefSeq":[["NM_001012331","NP_001012331","REVIEWED"]],"UCSC":["uc001fqi.2"],"SwissProt":["X5DR71_HUMAN"]}]		Distribution: Detected in many; Specificity: Group enriched	antibody: A majority of normal tissues displayed moderate cytoplasmic staining, often with a granular pattern and stronger in luminal position. Strongest positivity was observed in skeletal muscle and heart muscle.; Cytoplasmic expression in several tissues, including neuronal cells in CNS.	Antibody: Most cancer cells displayed moderate to strong cytoplasmic immunoreactivity, often with a granular pattern.
1	NTRK3	4916	GP145-TrkC|TRKC	This gene encodes a member of the neurotrophic tyrosine receptor kinase (NTRK) family. This kinase is a membrane-bound receptor that, upon neurotrophin binding, phosphorylates itself and members of the MAPK pathway. Signalling through this kinase leads to cell differentiation and may play a role in the development of proprioceptive neurons that sense body position. Mutations in this gene have bee…	NTRK3 (Neurotrophic Receptor Tyrosine Kinase 3) is a Protein Coding gene. Diseases associated with NTRK3 include Fibrosarcoma and Congenital Mesoblastic Nephroma. Among its related pathways are Neuroscience and Guidance Cues and Growth Cone Motility. Gene Ontology (GO) annotations related to this gene include transferase activity, transferring phosphorus-containing groups and protein tyrosine kin…	Receptor tyrosine kinase involved in nervous system and probably heart development. Upon binding of its ligand NTF3/neurotrophin-3, NTRK3 autophosphorylates and activates different signaling pathways, including the phosphatidylinositol 3-kinase/AKT and the MAPK pathways, that control cell survival and differentiation. NTRK3_HUMAN,Q16288	7 11	4 10	9 13	3 7	neurotrophic receptor tyrosine kinase 3	chr15:88256796-87859749	symbol	H. sapiens	protein-coding	This gene encodes a member of the neurotrophic tyrosine receptor kinase (NTRK) family. This kinase is a membrane-bound receptor that, upon neurotrophin binding, phosphorylates itself and members of the MAPK pathway. Signalling through this kinase leads to cell differentiation and may play a role in the development of proprioceptive neurons that sense body position. Mutations in this gene have bee…	GO:0019056 modulation by virus of host transcription;GO:0052026 modulation by symbiont of host transcription;GO:0048687 positive regulation of sprouting of injured axon	[GO:0003674] molecular_function; [GO:0043167] ion binding; [GO:0005575] cellular_component; [GO:0008150] biological_process; [GO:0006464] cellular protein modification process; [GO:0005886] plasma membrane; [GO:0016301] kinase activity; [GO:0007165] signal transduction; [GO:0008283] cell population proliferation; [GO:0040011] locomotion; [GO:0048870] cell motility; [GO:0048856] anatomical structu…	GO:0099055 integral component of postsynaptic membrane;GO:0098936 intrinsic component of postsynaptic membrane;GO:0099699 integral component of synaptic membrane	GO:0005030 neurotrophin receptor activity;GO:0005004 GPI-linked ephrin receptor activity;GO:0043121 neurotrophin binding	Tyr protein kinase family	Predicted intracellular proteins; Disease related genes; Cancer-related genes:Candidate cancer biomarkers; Enzymes; Potential drug targets; Kinases:Tyr protein kinases; ENZYME proteins:Transferases	[IPR000372] Leucine-rich repeat N-terminal domain; [IPR000483] Cysteine-rich flanking region, C-terminal; [IPR000719] Protein kinase domain; [IPR001245] Serine-threonine/tyrosine-protein kinase, catalytic domain; [IPR001611] Leucine-rich repeat; [IPR002011] Tyrosine-protein kinase, receptor class II, conserved site; [IPR003599] Immunoglobulin subtype; [IPR007110] Immunoglobulin-like domain; [IPR0…	Nucleoli (reliability']); Additional: Nuclear membrane			yes	yes	yes		yes	MP:0005385 cardiovascular system phenotype; MP:0010768 mortality/aging; MP:0005378 growth/size/body region phenotype; MP:0005386 behavior/neurological phenotype; MP:0003631 nervous system phenotype; MP:0005391 vision/eye phenotype; MP:0005377 hearing/vestibular/ear phenotype; MP:0005388 respiratory system phenotype	[ORPHA:2665] Congenital mesoblastic nephroma; [ORPHA:146] Differentiated thyroid carcinoma; [ORPHA:2030] Fibrosarcoma	OMIM ID:191316 Neurotrophic tyrosine kinase, receptor, type 3		Alanine Transaminase;Breast Neoplasms;Coronary Artery Disease;Interleukin-1beta;Personality;Vital Capacity	Attention Deficit Disorder with Hyperactivity;Bipolar Disorder;Child Development Disorders, Pervasive;Depressive Disorder;Gaucher Disease;Schizophrenia				Entrectinib; Fostamatinib; Larotrectinib	Thyroid Gland Adenocarcinoma; Cellular Congenital Mesoblastic Nephroma; Mammary Analog Secretory Carcinoma of Salivary Gland; Mesoblastic nephroma, cellular; Spindle cell nevus of Reed; tumor miofibroblÃ¡stico peribronquial congÃ©nito; low-grade salivary gland carcinoma; Benign neoplasm of kidney; Vulvar Neoplasms; Cystadenocarcinoma; Compulsive hoarding; Infantile fibrosarcoma; Mammary Analogue …	110	172	[{"UniProt":"B7Z7U4","EnsemblGene":["ENSG00000140538"],"EnsemblTrans":[["ENST00000542733","ENSP00000437773",""]],"RefSeq":[["NM_001320135","NP_001307064","REVIEWED"]],"UCSC":["uc010upl.1"],"SwissProt":["B7Z7U4_HUMAN"]},{"UniProt":"Q16288","EnsemblGene":["ENSG00000140538"],"RefSeq":[["NM_001320134","NP_001307063","REVIEWED"],["NM_001320135","NP_001307064","REVIEWED"],["XM_017022253","XP_016877742"…		Distribution: Detected in many; Specificity: Tissue enhanced	High nuclear and cytoplasmic expression in cerebral cortex.; antibody: Most normal tissues showed weak to moderate cytoplasmic and nuclear positivity. Neuronal cells of cerebral cortex and neuropil were strongly stained.	Antibody: Most cancer cells were negative. Lymphomas, colorectal, cervical and liver cancer tissues showed weak to moderate cytoplasmic and nuclear staining in a fraction of cells.
1	PAFAH1B2	5049	HEL-S-303	Platelet-activating factor acetylhydrolase (PAFAH) inactivates platelet-activating factor (PAF) into acetate and LYSO-PAF. This gene encodes the beta subunit of PAFAH, the other subunits are alpha and gamma. Multiple alternatively spliced transcript variants have been described for this gene. [provided by RefSeq, Jan 2014]	PAFAH1B2 (Platelet Activating Factor Acetylhydrolase 1b Catalytic Subunit 2) is a Protein Coding gene. Diseases associated with PAFAH1B2 include Lissencephaly. Among its related pathways are Acyl chain remodelling of PE and Innate Immune System. Gene Ontology (GO) annotations related to this gene include protein homodimerization activity and hydrolase activity. An important paralog of this gene i…	Inactivates PAF by removing the acetyl group at the sn-2 position. This is a catalytic subunit. PA1B2_HUMAN,P68402	28 42	21 36	30 54	24 36	platelet activating factor acetylhydrolase 1b catalytic subunit 2	chr11:117144287-117178173	symbol	H. sapiens	protein-coding	Platelet-activating factor acetylhydrolase (PAFAH) inactivates platelet-activating factor (PAF) into acetate and LYSO-PAF. This gene encodes the beta subunit of PAFAH, the other subunits are alpha and gamma. Multiple alternatively spliced transcript variants have been described for this gene. [provided by RefSeq, Jan 2014]	GO:0016239 positive regulation of macroautophagy;GO:0010508 positive regulation of autophagy;GO:0016241 regulation of macroautophagy	[GO:0005575] cellular_component; [GO:0005737] cytoplasm; [GO:0005622] intracellular; [GO:0043226] organelle; [GO:0005634] nucleus; [GO:0005730] nucleolus; [GO:0005829] cytosol; [GO:0005886] plasma membrane; [GO:0003674] molecular_function; [GO:0008150] biological_process; [GO:0006629] lipid metabolic process; [GO:0009056] catabolic process; [GO:0005576] extracellular region; [GO:0005615] extracel…	GO:1904813 ficolin-1-rich granule lumen;GO:0001650 fibrillar center;GO:0044452 nucleolar part	GO:0047179 platelet-activating factor acetyltransferase activity;GO:0003847 1-alkyl-2-acetylglycerophosphocholine esterase activity;GO:0016407 acetyltransferase activity		ENZYME proteins:Hydrolases; Predicted intracellular proteins; Cancer-related genes; Enzymes	[IPR036514] SGNH hydrolase superfamily; [IPR013830] SGNH hydrolase-type esterase domain	Cytosol (reliability']); Additional: Nucleoli;Plasma membrane								MP:0005384 cellular phenotype; MP:0005389 reproductive system phenotype; MP:0005379 endocrine/exocrine gland phenotype		OMIM ID:602508 Platelet-activating factor acetylhydrolase, isoform 1b, beta subunit		Hypertriglyceridemia;Receptors, Transferrin	Bronchodilator Agents;Cerebrospinal Fluid;Cholesterol, HDL;Forced Expiratory Volume;Lung Volume Measurements					Soluble Transferrin Receptor Measurement; Protein measurement; anaphylaxis; High density lipoprotein measurement; Triglycerides measurement; Systolic Pressure; Pancreatic Ductal Adenocarcinoma; Body mass index; ANOPHTHALMIA AND PULMONARY HYPOPLASIA; Malignant neoplasm of pancreas; Pancreatic carcinoma; Alzheimer's Disease; Neoplasm Metastasis; Tumor Cell Invasion; Primary malignant neoplasm; Mali…	12	44	[{"UniProt":"P68402","EnsemblGene":["ENSG00000168092"],"RefSeq":[["NM_001309431","NP_001296360","VALIDATED"]],"SwissProt":["PA1B2_HUMAN"]},{"UniProt":"V9HW44","RefSeq":[["NM_002572","NP_002563","VALIDATED"]],"UCSC":["uc001pqe.4"],"SwissProt":["V9HW44_HUMAN"]}]	tongue	Distribution: Detected in all; Specificity: Low tissue specificity	antibody: Most normal tissues showed weak to moderate cytoplasmic positivity with additional membranous positivity in several cases. Small intestine displayed strong immunoreactivity. Glomeruli of kidney and bile ducts were negative.; Cytoplasmic expression in most tissues at variable levels.	Antibody: Malignant tissues displayed weak to moderate cytoplasmic positivity with additional membranous positivity in several cases. A few cases of malignant lymphomas, colorectal and endometrial cancers exhibited strong immunoreactivity. Several cases of renal cancers were negative.
1	PDGFRA	5156	CD140A|PDGFR-2|PDGFR2	This gene encodes a cell surface tyrosine kinase receptor for members of the platelet-derived growth factor family. These growth factors are mitogens for cells of mesenchymal origin. The identity of the growth factor bound to a receptor monomer determines whether the functional receptor is a homodimer or a heterodimer, composed of both platelet-derived growth factor receptor alpha and beta polype…	PDGFRA (Platelet Derived Growth Factor Receptor Alpha) is a Protein Coding gene. Diseases associated with PDGFRA include Gist-Plus Syndrome and Hypereosinophilic Syndrome, Idiopathic. Among its related pathways are RET signaling and Phospholipase D signaling pathway. Gene Ontology (GO) annotations related to this gene include protein homodimerization activity and protein kinase activity. An impor…	Tyrosine-protein kinase that acts as a cell-surface receptor for PDGFA, PDGFB and PDGFC and plays an essential role in the regulation of embryonic development, cell proliferation, survival and chemotaxis. Depending on the context, promotes or inhibits cell proliferation and cell migration. Plays an important role in the differentiation of bone marrow-derived mesenchymal stem cells. Required for n…	15 34	9 20	13 57	9 27	platelet derived growth factor receptor alpha	chr4:54229127-54298245	symbol	H. sapiens	protein-coding	This gene encodes a cell surface tyrosine kinase receptor for members of the platelet-derived growth factor family. These growth factors are mitogens for cells of mesenchymal origin. The identity of the growth factor bound to a receptor monomer determines whether the functional receptor is a homodimer or a heterodimer, composed of both platelet-derived growth factor receptor alpha and beta polype…	GO:0038086 VEGF-activated platelet-derived growth factor receptor signaling pathway;GO:0038091 positive regulation of cell proliferation by VEGF-activated platelet derived growth factor receptor signaling pathway;GO:0072275 metanephric glomerulus morphogenesis	[GO:0003674] molecular_function; [GO:0043167] ion binding; [GO:0008150] biological_process; [GO:0006464] cellular protein modification process; [GO:0016301] kinase activity; [GO:0007165] signal transduction; [GO:0008283] cell population proliferation; [GO:0040011] locomotion; [GO:0048870] cell motility; [GO:0005575] cellular_component; [GO:0005622] intracellular; [GO:0043226] organelle; [GO:00056…	GO:0005902 microvillus;GO:0098858 actin-based cell projection;GO:0009897 external side of plasma membrane	GO:0005018 platelet-derived growth factor alpha-receptor activity;GO:0005017 platelet-derived growth factor-activated receptor activity;GO:0038085 vascular endothelial growth factor binding	Tyr protein kinase family	CD markers; Predicted intracellular proteins; FDA approved drug targets:Small molecule drugs; Disease related genes; FDA approved drug targets:Biotech drugs; Cancer-related genes:Candidate cancer biomarkers; Cancer-related genes:Mutational cancer driver genes; Enzymes; Kinases:Tyr protein kinases; ENZYME proteins:Transferases; RAS pathway related proteins	[IPR000719] Protein kinase domain; [IPR001245] Serine-threonine/tyrosine-protein kinase, catalytic domain; [IPR001824] Tyrosine-protein kinase, receptor class III, conserved site; [IPR003598] Immunoglobulin subtype 2; [IPR003599] Immunoglobulin subtype; [IPR007110] Immunoglobulin-like domain; [IPR008266] Tyrosine-protein kinase, active site; [IPR011009] Protein kinase-like domain superfamily; [IP…	Cell Junctions;Nucleoplasm;Plasma membrane (reliability'])			yes	yes	yes		yes	MP:0005367 renal/urinary system phenotype; MP:0005385 cardiovascular system phenotype; MP:0010768 mortality/aging; MP:0005369 muscle phenotype; MP:0005376 homeostasis/metabolism phenotype; MP:0005384 cellular phenotype; MP:0005378 growth/size/body region phenotype; MP:0005386 behavior/neurological phenotype; MP:0005381 digestive/alimentary phenotype; MP:0005387 immune system phenotype; MP:0002006…	[ORPHA:168940] Chronic eosinophilic leukemia; [ORPHA:44890] Gastrointestinal stromal tumor; [ORPHA:168947] Myeloid/lymphoid neoplasm associated with PDGFRA rearrangement; [ORPHA:99860] Precursor B-cell acute lymphoblastic leukemia; [ORPHA:314950] Primary hypereosinophilic syndrome	OMIM ID:173490 Platelet-derived growth factor receptor, alpha	Gastrointestinal stromal tumor; Cutaneous melanoma; Polyps, multiple and recurrent inflammatory fibroid, gastrointestinal; Hypereosinophilic syndrome, idiopathic, resistant to imatinib	Arteries;Atherosclerosis;Basophils;Platelet Function Tests	Astigmatism;Bipolar Disorder;Body Height;Breast Feeding;Corneal Topography;Drug Resistance;Erythrocyte Count;Erythrocyte Indices;Hematocrit;Hemoglobins		Cutaneous melanoma: likely pathogenic; Gastrointestinal stromal tumor, familial: likely pathogenic,not provided,pathogenic; Gastrointestinal stroma tumor: likely pathogenic,not provided,pathogenic; Hypereosinophilic syndrome, idiopathic, resistant to imatinib: pathogenic	HP:0006685:Endocardial fibrosis; HP:0002576:Intussusception; HP:0100751:Esophageal neoplasm; HP:0100833:Neoplasm of the small intestine; HP:0005547:Myeloproliferative disorder; HP:0100273:Neoplasm of the colon; HP:0100242:Sarcoma; HP:0001723:Restrictive cardiomyopathy; HP:0100723:Gastrointestinal stroma tumor; HP:0100743:Neoplasm of the rectum; HP:0000707:Abnormality of the nervous system; HP:000…	Becaplermin; Imatinib; Sunitinib; XL820; Olaratumab; Pazopanib; Midostaurin; Regorafenib; Ponatinib; Lenvatinib; Nintedanib; Foreskin keratinocyte (neonatal); Fostamatinib; Erdafitinib; Amuvatinib; Ripretinib	Cerebral hygroma; Eosinophilic granulomatous polyp; HYPEREOSINOPHILIC SYNDROME, IDIOPATHIC, RESISTANT TO IMATINIB; Myeloid and/or lymphoid neoplasm associated with platelet derived growth factor receptor alpha rearrangement; Polyps, Multiple And Recurrent Inflammatory Fibroid, Gastrointestinal; Disorder of skull; Endometrial Small Cell Carcinoma; Histiocytosis, generalized eruptive; Laryngeal Sma…	407	502	[{"UniProt":"P16234","EnsemblGene":["ENSG00000134853"],"SwissProt":["PGFRA_HUMAN"]}]		Distribution: Detected in many; Specificity: Tissue enhanced	Cytoplasmic expression in myoepithelial cells and extracellular positivity in several tissues.
1	PER1	5187	PER|RIGUI|hPER	This gene is a member of the Period family of genes and is expressed in a circadian pattern in the suprachiasmatic nucleus, the primary circadian pacemaker in the mammalian brain. Genes in this family encode components of the circadian rhythms of locomotor activity, metabolism, and behavior. This gene is upregulated by CLOCK/ARNTL heterodimers but then represses this upregulation in a feedback lo…	PER1 (Period Circadian Regulator 1) is a Protein Coding gene. Diseases associated with PER1 include Advanced Sleep Phase Syndrome and Rem Sleep Behavior Disorder. Among its related pathways are HIF1Alpha Pathway and Circadian rhythm. Gene Ontology (GO) annotations related to this gene include transcription factor binding and RNA polymerase II proximal promoter sequence-specific DNA binding. An im…	Transcriptional repressor which forms a core component of the circadian clock. The circadian clock, an internal time-keeping system, regulates various physiological processes through the generation of approximately 24 hour circadian rhythms in gene expression, which are translated into rhythms in metabolism and behavior. It is derived from the Latin roots 'circa' (about) and 'diem' (day) and acts…	59 46	84 66	53 35	50 26	period circadian regulator 1	chr17:8156360-8140470	symbol	H. sapiens	protein-coding	This gene is a member of the Period family of genes and is expressed in a circadian pattern in the suprachiasmatic nucleus, the primary circadian pacemaker in the mammalian brain. Genes in this family encode components of the circadian rhythms of locomotor activity, metabolism, and behavior. This gene is upregulated by CLOCK/ARNTL heterodimers but then represses this upregulation in a feedback lo…	GO:0097167 circadian regulation of translation;GO:2000323 negative regulation of glucocorticoid receptor signaling pathway;GO:2000322 regulation of glucocorticoid receptor signaling pathway	[GO:0003674] molecular_function; [GO:0005575] cellular_component; [GO:0005622] intracellular; [GO:0043226] organelle; [GO:0005634] nucleus; [GO:0005737] cytoplasm; [GO:0005654] nucleoplasm; [GO:0005829] cytosol; [GO:0003677] DNA binding; [GO:0008150] biological_process; [GO:0034641] cellular nitrogen compound metabolic process; [GO:0009058] biosynthetic process; [GO:0008134] transcription factor …	GO:0005654 nucleoplasm;GO:0005829 cytosol;GO:0031981 nuclear lumen	GO:0001222 transcription corepressor binding;GO:0070888 E-box binding;GO:0001221 transcription cofactor binding		Predicted intracellular proteins; Cancer-related genes	[IPR000014] PAS domain; [IPR013655] PAS fold-3; [IPR022728] Period circadian-like, C-terminal; [IPR035965] PAS domain superfamily	Cytosol (reliability']); Additional: Nucleoplasm								MP:0010768 mortality/aging; MP:0005376 homeostasis/metabolism phenotype; MP:0005378 growth/size/body region phenotype; MP:0005386 behavior/neurological phenotype; MP:0005389 reproductive system phenotype; MP:0003631 nervous system phenotype; MP:0005390 skeleton phenotype		OMIM ID:602260 Period circadian regulator 1								Middle insomnia; Jet Lag Syndrome; Mucopolysaccharidosis II; Paranoia; Bacteroides fragilis infection in conditions classified elsewhere and of unspecified site; Pseudomonas aeruginosa infection; heavy drinking; Drug Withdrawal Symptoms; Substance Withdrawal Syndrome; secondary acute myeloid leukemia; Hypocalcemia; Obsessive compulsive behavior; Early gastric cancer; Anxiety symptoms; Attention D…	91	136	[{"UniProt":"O15534","EnsemblGene":["ENSG00000179094"],"SwissProt":["PER1_HUMAN"]}]	peripheral_nervous_system	Distribution: Detected in all; Specificity: Low tissue specificity
1	PHF6	84295	BFLS|BORJ|CENP-31	This gene is a member of the plant homeodomain (PHD)-like finger (PHF) family. It encodes a protein with two PHD-type zinc finger domains, indicating a potential role in transcriptional regulation, that localizes to the nucleolus. Mutations affecting the coding region of this gene or the splicing of the transcript have been associated with Borjeson-Forssman-Lehmann syndrome (BFLS), a disorder cha…	PHF6 (PHD Finger Protein 6) is a Protein Coding gene. Diseases associated with PHF6 include Borjeson-Forssman-Lehmann Syndrome and Mixed Phenotype Acute Leukemia. Among its related pathways are Mesodermal Commitment Pathway. Gene Ontology (GO) annotations related to this gene include histone binding. An important paralog of this gene is PHF11.	Transcriptional regulator that associates with ribosomal RNA promoters and suppresses ribosomal RNA (rRNA) transcription. PHF6_HUMAN,Q8IWS0	13 19	11 12	17 29	11 16	PHD finger protein 6	chrX:134373312-134428790	symbol	H. sapiens	protein-coding	This gene is a member of the plant homeodomain (PHD)-like finger (PHF) family. It encodes a protein with two PHD-type zinc finger domains, indicating a potential role in transcriptional regulation, that localizes to the nucleolus. Mutations affecting the coding region of this gene or the splicing of the transcript have been associated with Borjeson-Forssman-Lehmann syndrome (BFLS), a disorder cha…	GO:0001835 blastocyst hatching;GO:0035188 hatching;GO:0071684 organism emergence from protective structure	[GO:0005575] cellular_component; [GO:0005622] intracellular; [GO:0043226] organelle; [GO:0005634] nucleus; [GO:0003674] molecular_function; [GO:0003723] RNA binding; [GO:0043167] ion binding; [GO:0005654] nucleoplasm; [GO:0005730] nucleolus; [GO:0003677] DNA binding; [GO:0005694] chromosome; [GO:0042393] histone binding; [GO:0008150] biological_process; [GO:0034641] cellular nitrogen compound met…	GO:0000777 condensed chromosome kinetochore;GO:0000779 condensed chromosome, centromeric region;GO:0000776 kinetochore	GO:0097110 scaffold protein binding;GO:0051219 phosphoprotein binding;GO:0042826 histone deacetylase binding		Disease related genes; Cancer-related genes:Mutational cancer driver genes; Predicted intracellular proteins; Cancer-related genes:Mutated cancer genes	[IPR001965] Zinc finger, PHD-type; [IPR013083] Zinc finger, RING/FYVE/PHD-type; [IPR034732] Extended PHD (ePHD) domain	Nucleoli;Nucleoplasm (reliability'])								MP:0010768 mortality/aging; MP:0005378 growth/size/body region phenotype; MP:0005386 behavior/neurological phenotype; MP:0003631 nervous system phenotype; MP:0005377 hearing/vestibular/ear phenotype	[ORPHA:127] BORJESON-FORSSMAN-LEHMANN SYNDROME	OMIM ID:300414 Phd finger protein 6	Borjeson-Forssman-Lehmann syndrome; Inborn genetic diseases			[301900] BOERJESON-FORSSMAN-LEHMANN SYNDROME	Borjeson-forssman-lehmann syndrome: likely pathogenic,pathogenic; Clinvar: phenotype not specified: likely pathogenic,pathogenic; Inborn genetic diseases: pathogenic	HP:0008687:Hypoplasia of the prostate; HP:0008478:Scheuermann-like vertebral changes; HP:0008094:Widely spaced toes; HP:0008445:Cervical spinal canal stenosis; HP:0006110:Shortening of all middle phalanges of the fingers; HP:0001836:Camptodactyly of toe; HP:0009748:Large earlobe; HP:0002684:Thickened calvaria; HP:0001769:Broad foot; HP:0045025:Narrow palpebral fissure; HP:0000336:Prominent suprao…		Hypoplasia of the prostate; Scheuermann-like vertebral changes; Short middle phalanx of the 4th toe; Widely spaced toes; Cervical spinal canal stenosis; Shortening of all middle phalanges of the fingers; Borjeson-Forssman-Lehmann syndrome; Camptodactyly of toe; Large earlobe; Mental handicap; Thickened calvaria; Broad foot; Talipes transversoplanus; Acute myeloid leukemia, minimal differentiation…	34	79	[{"UniProt":"Q8IWS0","EnsemblGene":["ENSG00000156531"],"SwissProt":["PHF6_HUMAN"]}]	small_intestine	Distribution: Detected in all; Specificity: Low tissue specificity	Ubiquitous nuclear expression.; antibody: Most normal tissues showed moderate to strong nuclear positivity. Liver and parathyroid gland were negative.	Antibody: Most cancer tissues showed nuclear and nucleolar positivity of varying intensities. Most renal cancers and hepatocellular carcinomas were negative.
1	PICALM	8301	CALM|CLTH|LAP	This gene encodes a clathrin assembly protein, which recruits clathrin and adaptor protein complex 2 (AP2) to cell membranes at sites of coated-pit formation and clathrin-vesicle assembly. The protein may be required to determine the amount of membrane to be recycled, possibly by regulating the size of the clathrin cage. The protein is involved in AP2-dependent clathrin-mediated endocytosis at th…	PICALM (Phosphatidylinositol Binding Clathrin Assembly Protein) is a Protein Coding gene. Diseases associated with PICALM include Leukemia, Acute Myeloid and Precursor T-Cell Acute Lymphoblastic Leukemia. Among its related pathways are Clathrin-mediated endocytosis and Clathrin derived vesicle budding. Gene Ontology (GO) annotations related to this gene include phospholipid binding and 1-phosphat…	Cytoplasmic adapter protein that plays a critical role in clathrin-mediated endocytosis which is important in processes such as internalization of cell receptors, synaptic transmission or removal of apoptotic cells. Recruits AP-2 and attaches clathrin triskelions to the cytoplasmic side of plasma membrane leading to clathrin-coated vesicles (CCVs) assembly (PubMed:10436022, PubMed:16262731, PubMe…	55 74	45 67	69 109	49 65	phosphatidylinositol binding clathrin assembly protein	chr11:86069860-85957175	symbol	H. sapiens	protein-coding	This gene encodes a clathrin assembly protein, which recruits clathrin and adaptor protein complex 2 (AP2) to cell membranes at sites of coated-pit formation and clathrin-vesicle assembly. The protein may be required to determine the amount of membrane to be recycled, possibly by regulating the size of the clathrin cage. The protein is involved in AP2-dependent clathrin-mediated endocytosis at th…	GO:0097753 membrane bending;GO:1902962 regulation of metalloendopeptidase activity involved in amyloid precursor protein catabolic process;GO:1902963 negative regulation of metalloendopeptidase activity involved in amyloid precursor protein catabolic process	[GO:0003674] molecular_function; [GO:0043167] ion binding; [GO:0008289] lipid binding; [GO:0008150] biological_process; [GO:0006810] transport; [GO:0016192] vesicle-mediated transport; [GO:0065003] protein-containing complex assembly; [GO:0022607] cellular component assembly; [GO:0005575] cellular_component; [GO:0005737] cytoplasm; [GO:0005622] intracellular; [GO:0043226] organelle; [GO:0031410] …	GO:0070381 endosome to plasma membrane transport vesicle;GO:0098894 extrinsic component of presynaptic endocytic zone membrane;GO:0097418 neurofibrillary tangle	GO:0032050 clathrin heavy chain binding;GO:0005545 1-phosphatidylinositol binding;GO:0050750 low-density lipoprotein particle receptor binding		Predicted intracellular proteins; Disease related genes; Cancer-related genes	[IPR008942] ENTH/VHS; [IPR011417] AP180 N-terminal homology (ANTH) domain; [IPR013809] ENTH domain; [IPR014712] Phosphoinositide-binding clathrin adaptor, domain 2; [IPR030412] Phosphatidylinositol-binding clathrin assembly protein	Vesicles (reliability'])								MP:0005370 liver/biliary system phenotype; MP:0010768 mortality/aging; MP:0005376 homeostasis/metabolism phenotype; MP:0005384 cellular phenotype; MP:0005378 growth/size/body region phenotype; MP:0005387 immune system phenotype; MP:0005397 hematopoietic system phenotype; MP:0010771 integument phenotype; MP:0005380 embryo phenotype; MP:0001186 pigmentation phenotype	[ORPHA:99861] Precursor T-cell acute lymphoblastic leukemia	OMIM ID:603025 Phosphatidylinositol-binding clathrin assembly protein		Glomerular Filtration Rate;Testosterone	Alzheimer Disease;Depression;Tourette Syndrome			HP:0004808:Acute myeloid leukemia; HP:0001428:Somatic mutation; HP:0000006:Autosomal dominant inheritance		NEUROFIBROMATOSIS, TYPE 1-LIKE SYNDROME; Paroxysmal familial ventricular fibrillation; Granulocytic Sarcoma; VENTRICULAR TACHYCARDIA, CATECHOLAMINERGIC POLYMORPHIC, 1 (disorder); Monocytic leukemia; Adult Lymphoblastic Lymphoma; Childhood Lymphoblastic Lymphoma; Precursor cell lymphoblastic lymphoma; Acute Confusional Senile Dementia; Alzheimer's Disease, Focal Onset; Adult T Acute Lymphoblastic …	89	150	[{"UniProt":"Q13492","EnsemblGene":["ENSG00000073921"],"SwissProt":["PICAL_HUMAN"]},{"UniProt":"A0A024R5L7","RefSeq":[["NM_001008660","NP_001008660","REVIEWED"]],"SwissProt":["A0A024R5L7_HUMAN"]},{"UniProt":"A0A024R5P1","RefSeq":[["NM_007166","NP_009097","REVIEWED"]],"SwissProt":["A0A024R5P1_HUMAN"]}]		Distribution: Detected in all; Specificity: Low tissue specificity	antibody: Most normal tissues displayed moderate to strong cytoplasmic positivity. Neuronal cells and myocytes were negative or weakly stained.; Ubiquitous cytoplasmic and membranous expression, most abundant in gastrointestinal tract, kidney and placenta.	Antibody: Moderate to strong cytoplasmic staining was observed in most cancer tissues.
1	PIK3CA	5290	CLAPO|CLOVE|CWS5|MCAP|MCM|MCMTC|PI3K|PI3K-alpha|p110-alpha	Phosphatidylinositol 3-kinase is composed of an 85 kDa regulatory subunit and a 110 kDa catalytic subunit. The protein encoded by this gene represents the catalytic subunit, which uses ATP to phosphorylate PtdIns, PtdIns4P and PtdIns(4,5)P2. This gene has been found to be oncogenic and has been implicated in cervical cancers. A pseudogene of this gene has been defined on chromosome 22. [provided …	PIK3CA (Phosphatidylinositol-4,5-Bisphosphate 3-Kinase Catalytic Subunit Alpha) is a Protein Coding gene. Diseases associated with PIK3CA include Hepatocellular Carcinoma and Megalencephaly-Capillary Malformation-Polymicrogyria Syndrome. Among its related pathways are GDNF-Family Ligands and Receptor Interactions and RET signaling. Gene Ontology (GO) annotations related to this gene include trans…	Phosphoinositide-3-kinase (PI3K) that phosphorylates PtdIns (Phosphatidylinositol), PtdIns4P (Phosphatidylinositol 4-phosphate) and PtdIns(4,5)P2 (Phosphatidylinositol 4,5-bisphosphate) to generate phosphatidylinositol 3,4,5-trisphosphate (PIP3). PIP3 plays a key role by recruiting PH domain-containing proteins to the membrane, including AKT1 and PDPK1, activating signaling cascades involved in c…	17 26	19 25	14 25	13 15	phosphatidylinositol-4,5-bisphosphate 3-kinase catalytic subunit alpha	chr3:179148114-179240093	symbol	H. sapiens	protein-coding	Phosphatidylinositol 3-kinase is composed of an 85 kDa regulatory subunit and a 110 kDa catalytic subunit. The protein encoded by this gene represents the catalytic subunit, which uses ATP to phosphorylate PtdIns, PtdIns4P and PtdIns(4,5)P2. This gene has been found to be oncogenic and has been implicated in cervical cancers. A pseudogene of this gene has been defined on chromosome 22. [provided …	GO:0044028 DNA hypomethylation;GO:0044029 hypomethylation of CpG island;GO:0038028 insulin receptor signaling pathway via phosphatidylinositol 3-kinase	[GO:0003674] molecular_function; [GO:0008150] biological_process; [GO:0016301] kinase activity; [GO:0009058] biosynthetic process; [GO:0006629] lipid metabolic process; [GO:0007165] signal transduction; [GO:0043167] ion binding; [GO:0006464] cellular protein modification process; [GO:0005575] cellular_component; [GO:0005737] cytoplasm; [GO:0005622] intracellular; [GO:0048856] anatomical structure…	GO:0005943 phosphatidylinositol 3-kinase complex, class IA;GO:0005944 phosphatidylinositol 3-kinase complex, class IB;GO:0097651 phosphatidylinositol 3-kinase complex, class I	GO:0052812 phosphatidylinositol-3,4-bisphosphate 5-kinase activity;GO:0046934 phosphatidylinositol-4,5-bisphosphate 3-kinase activity;GO:0052813 phosphatidylinositol bisphosphate kinase activity	Atypical: PI3/PI4-kinase family	Kinases:Atypical kinases; Predicted intracellular proteins; FDA approved drug targets:Small molecule drugs; Disease related genes; Cancer-related genes:Candidate cancer biomarkers; Cancer-related genes:Mutational cancer driver genes; Enzymes; ENZYME proteins:Transferases; RAS pathway related proteins; Cancer-related genes:Mutated cancer genes	[IPR000341] Phosphatidylinositol 3-kinase Ras-binding (PI3K RBD) domain; [IPR000403] Phosphatidylinositol 3-/4-kinase, catalytic domain; [IPR001263] Phosphoinositide 3-kinase, accessory (PIK) domain; [IPR002420] Phosphatidylinositol 3-kinase, C2 domain; [IPR003113] Phosphatidylinositol 3-kinase adaptor-binding (PI3K ABD) domain; [IPR008290] Phosphatidylinositol 3-kinase, Vps34 type; [IPR011009] P…	Cytosol (reliability'])						principal1		MP:0005367 renal/urinary system phenotype; MP:0005370 liver/biliary system phenotype; MP:0005385 cardiovascular system phenotype; MP:0010768 mortality/aging; MP:0005369 muscle phenotype; MP:0005376 homeostasis/metabolism phenotype; MP:0005384 cellular phenotype; MP:0005378 growth/size/body region phenotype; MP:0005386 behavior/neurological phenotype; MP:0005387 immune system phenotype; MP:0002006…	[ORPHA:210159] Adult hepatocellular carcinoma; [ORPHA:140944] CLOVES syndrome; [ORPHA:201] COWDEN SYNDROME; [ORPHA:276280] Hemihyperplasia-multiple lipomatosis syndrome; [ORPHA:99802] Hemimegalencephaly; [ORPHA:144] Lynch syndrome; [ORPHA:295239] Macrodactyly of fingers unilateral; [ORPHA:295243] Macrodactyly of toes unilateral; [ORPHA:60040] Megalencephaly-capillary malformation-polymicrogyria s…	OMIM ID:171834 Phosphatidylinositol 3-kinase, catalytic, alpha	Squamous cell lung carcinoma; Megalencephaly-capillary malformation-polymicrogyria syndrome; Cowden syndrome 1; PIK3CA related overgrowth spectrum; Familial cancer of breast; Capillary malformation of the lower lip, lymphatic malformation of face and neck, asymmetry of face and limbs, and partial/generalized overgrowth; Endometrial carcinoma; Ovarian Neoplasms; Cowden syndrome; Squamous cell carc…			[612918] CLOVES: CONGENITAL LIPOMATOUS OVERGROWTH VASCULAR MALFORMATIONS AND EPIDERMAL NEVI; [No disease mim] Hemimegalencephaly PIK3CA; [602501] Megalencephaly-Capillary malformation-Polymicrogyria syndrome somatic 3	Adenocarcinoma of prostate: drug response,likely pathogenic,not provided,pathogenic; Adenocarcinoma of stomach: drug response,likely pathogenic,not provided,pathogenic; Adenoid cystic carcinoma: likely pathogenic,pathogenic; Adrenocortical carcinoma: likely pathogenic,pathogenic; Brainstem glioma: drug response,likely pathogenic,not provided,pathogenic; Breast adenocarcinoma: drug response,likely…	HP:0002624:Abnormal venous morphology; HP:0012887:Ovarian serous cystadenoma; HP:0040009:Hyperparakeratosis; HP:0010714:2-4 toe syndactyly; HP:0025104:Capillary malformation; HP:0012871:Varicocele; HP:0004481:Progressive macrocephaly; HP:0100555:Asymmetric growth; HP:0006774:Ovarian papillary adenocarcinoma; HP:0004099:Macrodactyly; HP:0012721:Venous malformation; HP:0001054:Numerous nevi; HP:000…	ATP; Caffeine; XL765; Wortmannin; Pilaralisib; Alpelisib; Copanlisib	Accessory skeletal muscle; CLAPO Syndrome; COWDEN SYNDROME 5; Congenital Lipomatous Overgrowth, Vascular Malformations, and Epidermal Nevi; Congenital malformation syndromes involving early overgrowth; Lichenoid actinic keratosis; Lipomatosis of Nerve; MACRODACTYLY, SOMATIC; MEGALENCEPHALY-CAPILLARY MALFORMATION-POLYMICROGYRIA SYNDROME, SOMATIC; Macrodactylia of fingers; Macrodactyly of toe; Medi…	1274	1457	[{"UniProt":"P42336","EnsemblGene":["ENSG00000121879"],"EnsemblTrans":[["ENST00000263967","ENSP00000263967","principal1"]],"RefSeq":[["NM_006218","NP_006209","REVIEWED"],["XM_006713658","XP_006713721","MODEL"],["XM_011512894","XP_011511196","MODEL"]],"UCSC":["uc003fjk.4"],"SwissProt":["PK3CA_HUMAN"]},{"UniProt":"Q4LE51","RefSeq":[["NM_006218","NP_006209","REVIEWED"],["XM_006713658","XP_006713721"…	lymph_node	Distribution: Detected in all; Specificity: Low tissue specificity	General cytoplasmic expression.; antibody: Most normal tissues showed moderate to strong cytoplasmic positivity with a granular pattern. Stromal cells, cells in CNS, epididymis, cells in glomeruli and muscle cells were weakly stained or negative.	Antibody: Cancer cells showed moderate to strong cytoplasmic immunoreactivity with a granular pattern. Most gliomas and several cases of renal, testicular and breast cancers were weakly stained or negative.
1	PIK3R1	5295	AGM7|GRB1|IMD36|p85|p85-ALPHA	Phosphatidylinositol 3-kinase phosphorylates the inositol ring of phosphatidylinositol at the 3-prime position. The enzyme comprises a 110 kD catalytic subunit and a regulatory subunit of either 85, 55, or 50 kD. This gene encodes the 85 kD regulatory subunit. Phosphatidylinositol 3-kinase plays an important role in the metabolic actions of insulin, and a mutation in this gene has been associated…	PIK3R1 (Phosphoinositide-3-Kinase Regulatory Subunit 1) is a Protein Coding gene. Diseases associated with PIK3R1 include Short Syndrome and Agammaglobulinemia 7, Autosomal Recessive. Among its related pathways are Common Cytokine Receptor Gamma-Chain Family Signaling Pathways and GDNF-Family Ligands and Receptor Interactions. Gene Ontology (GO) annotations related to this gene include GTP bindin…	Binds to activated (phosphorylated) protein-Tyr kinases, through its SH2 domain, and acts as an adapter, mediating the association of the p110 catalytic unit to the plasma membrane. Necessary for the insulin-stimulated increase in glucose uptake and glycogen synthesis in insulin-sensitive tissues. Plays an important role in signaling in response to FGFR1, FGFR2, FGFR3, FGFR4, KITLG/SCF, KIT, PDGF…	37 82	47 42	25 57	35 48	phosphoinositide-3-kinase regulatory subunit 1	chr5:68215737-68301821	symbol	H. sapiens	protein-coding	Phosphatidylinositol 3-kinase phosphorylates the inositol ring of phosphatidylinositol at the 3-prime position. The enzyme comprises a 110 kD catalytic subunit and a regulatory subunit of either 85, 55, or 50 kD. This gene encodes the 85 kD regulatory subunit. Phosphatidylinositol 3-kinase plays an important role in the metabolic actions of insulin, and a mutation in this gene has been associated…	GO:1900103 positive regulation of endoplasmic reticulum unfolded protein response;GO:0060396 growth hormone receptor signaling pathway;GO:0071378 cellular response to growth hormone stimulus	[GO:0003674] molecular_function; [GO:0007165] signal transduction; [GO:0008150] biological_process; [GO:0006810] transport; [GO:0055085] transmembrane transport; [GO:0005575] cellular_component; [GO:0005622] intracellular; [GO:0043226] organelle; [GO:0005634] nucleus; [GO:0005737] cytoplasm; [GO:0015031] protein transport; [GO:0008219] cell death; [GO:0044403] symbiotic process; [GO:0002376] immu…	GO:0005943 phosphatidylinositol 3-kinase complex, class IA;GO:1990578 perinuclear endoplasmic reticulum membrane;GO:0097651 phosphatidylinositol 3-kinase complex, class I	GO:0043125 ErbB-3 class receptor binding;GO:0005167 neurotrophin TRK receptor binding;GO:0005168 neurotrophin TRKA receptor binding		Predicted intracellular proteins; Disease related genes; Cancer-related genes:Candidate cancer biomarkers; Cancer-related genes:Mutational cancer driver genes; RAS pathway related proteins; Cancer-related genes:Mutated cancer genes	[IPR000198] Rho GTPase-activating protein domain; [IPR000980] SH2 domain; [IPR001452] SH3 domain; [IPR008936] Rho GTPase activation protein; [IPR032498] PI3K p85 subunit, inter-SH2 domain; [IPR035020] PI3K p85 subunit, C-terminal SH2 domain; [IPR035022] PI3K p85 subunit, N-terminal SH2 domain; [IPR035591] Phosphatidylinositol 3-kinase regulatory subunit alpha, SH3 domain; [IPR036028] SH3-like dom…	Cytosol (reliability'])					yes			MP:0005370 liver/biliary system phenotype; MP:0005385 cardiovascular system phenotype; MP:0010768 mortality/aging; MP:0005369 muscle phenotype; MP:0005376 homeostasis/metabolism phenotype; MP:0005384 cellular phenotype; MP:0005378 growth/size/body region phenotype; MP:0005387 immune system phenotype; MP:0003631 nervous system phenotype; MP:0005391 vision/eye phenotype; MP:0005397 hematopoietic sy…	[ORPHA:397596] Activated PI3K-delta syndrome; [ORPHA:33110] Autosomal agammaglobulinemia; [ORPHA:3163] SHORT syndrome	OMIM ID:171833 Phosphatidylinositol 3-kinase, regulatory subunit 1	SHORT syndrome; Immunodeficiency 36; Agammaglobulinemia 7, autosomal recessive; Malignant melanoma of skin; Malignant neoplasm of body of uterus; Neoplasm of the large intestine; Neoplasm of brain; Neoplasm; Glioblastoma; Uterine Carcinosarcoma; Unilateral renal hypoplasia; Abnormality of brain morphology; Inguinal hernia; Diabetes mellitus; Triangular face; Midface retrusion; High palate; Intrau…	Arteries;Blood Pressure;Body Weight;Cholesterol;Cholesterol, HDL;Echocardiography;Obesity;Receptors, Interleukin-6;Tunica Media	Cartilage;Creatinine;Glomerular Filtration Rate;Schizophrenia	[615214] AGAMMAGLOBULINEMIA 7 AUTOSOMAL RECESSIVE; [269880] SHORT syndrome	Agammaglobulinemia 7, autosomal recessive: pathogenic; Clinvar: phenotype not specified: likely pathogenic,pathogenic; Glioblastoma: likely pathogenic; Immunodeficiency 36: pathogenic; Inborn genetic diseases: pathogenic,uncertain significance; Malignant melanoma of skin: likely pathogenic; Malignant neoplasm of body of uterus: likely pathogenic; Neoplasm: likely pathogenic; Neoplasm of brain: li…	HP:0000277:Abnormality of the mandible; HP:0010580:Enlarged epiphyses; HP:0005550:Chronic lymphatic leukemia; HP:0000558:Rieger anomaly; HP:0100678:Premature skin wrinkling; HP:0003561:Birth length less than 3rd percentile; HP:0012191:B-cell lymphoma; HP:0010751:Dimple chin; HP:0000831:Insulin-resistant diabetes mellitus; HP:0000593:Abnormal anterior chamber morphology; HP:0012758:Neurodevelopmen…	Isoprenaline; SF1126; Enzastaurin; Wortmannin	AGAMMAGLOBULINEMIA 7, AUTOSOMAL RECESSIVE; IMMUNODEFICIENCY 36; Abnormality of the mandible; Enlarged epiphyses; Autosomal recessive agammaglobulinemia; Agammaglobulinemia, non-Bruton type; ACTIVATED PI3K-DELTA SYNDROME; SHORT syndrome; Hyperimmunoglobulin M syndrome; Skin Wrinkling; Rieger eye malformation sequence; Partial lipodystrophy; Dimple chin; Anterior chamber anomalies; Pupillary abnorm…	204	775	[{"UniProt":"P27986","EnsemblGene":["ENSG00000145675"],"SwissProt":["P85A_HUMAN"]},{"UniProt":"A0A2X0SFG1","RefSeq":[["NM_181523","NP_852664","REVIEWED"],["XM_005248542","XP_005248599","MODEL"],["XM_017009585","XP_016865074","MODEL"]],"SwissProt":["A0A2X0SFG1_HUMAN"]}]		Distribution: Detected in all; Specificity: Low tissue specificity	General cytoplasmic expression.; antibody: A majority of normal cells showed weak to moderate cytoplasmic positivity.	Antibody: Most malignancies were weakly stained or negative.
1	PPARG	5468	CIMT1|GLM1|NR1C3|PPARG1|PPARG2|PPARG5|PPARgamma	This gene encodes a member of the peroxisome proliferator-activated receptor (PPAR) subfamily of nuclear receptors. PPARs form heterodimers with retinoid X receptors (RXRs) and these heterodimers regulate transcription of various genes. Three subtypes of PPARs are known: PPAR-alpha, PPAR-delta, and PPAR-gamma. The protein encoded by this gene is PPAR-gamma and is a regulator of adipocyte differen…	PPARG (Peroxisome Proliferator Activated Receptor Gamma) is a Protein Coding gene. Diseases associated with PPARG include Lipodystrophy, Familial Partial, Type 3 and Carotid Intimal Medial Thickness 1. Among its related pathways are Transcriptional misregulation in cancer and Respiratory electron transport, ATP synthesis by chemiosmotic coupling, and heat production by uncoupling proteins.. Gene …	Nuclear receptor that binds peroxisome proliferators such as hypolipidemic drugs and fatty acids. Once activated by a ligand, the nuclear receptor binds to DNA specific PPAR response elements (PPRE) and modulates the transcription of its target genes, such as acyl-CoA oxidase. It therefore controls the peroxisomal beta-oxidation pathway of fatty acids. Key regulator of adipocyte differentiation a…	19 36	11 13	22 35	16 25	peroxisome proliferator activated receptor gamma	chr3:12287368-12434344	symbol	H. sapiens	protein-coding	This gene encodes a member of the peroxisome proliferator-activated receptor (PPAR) subfamily of nuclear receptors. PPARs form heterodimers with retinoid X receptors (RXRs) and these heterodimers regulate transcription of various genes. Three subtypes of PPARs are known: PPAR-alpha, PPAR-delta, and PPAR-gamma. The protein encoded by this gene is PPAR-gamma and is a regulator of adipocyte differen…	GO:2000230 negative regulation of pancreatic stellate cell proliferation;GO:0060694 regulation of cholesterol transporter activity;GO:0071306 cellular response to vitamin E	[GO:0003674] molecular_function; [GO:0003677] DNA binding; [GO:0007165] signal transduction; [GO:0008150] biological_process; [GO:0043167] ion binding; [GO:0034641] cellular nitrogen compound metabolic process; [GO:0009058] biosynthetic process; [GO:0005575] cellular_component; [GO:0005622] intracellular; [GO:0043226] organelle; [GO:0005634] nucleus; [GO:0003700] DNA-binding transcription factor …	GO:0090575 RNA polymerase II transcription factor complex;GO:0044798 nuclear transcription factor complex;GO:0005667 transcription factor complex	GO:0050692 DBD domain binding;GO:0050544 arachidonic acid binding;GO:0050542 icosanoid binding		Predicted intracellular proteins; FDA approved drug targets:Small molecule drugs; Disease related genes; Transcription factors:Zinc-coordinating DNA-binding domains; Nuclear receptors; Cancer-related genes:Candidate cancer biomarkers	[IPR000536] Nuclear hormone receptor, ligand-binding domain; [IPR001628] Zinc finger, nuclear hormone receptor-type; [IPR001723] Nuclear hormone receptor; [IPR003074] Peroxisome proliferator-activated receptor; [IPR003077] Peroxisome proliferator-activated receptor gamma; [IPR013088] Zinc finger, NHR/GATA-type; [IPR022590] Peroxisome proliferator-activated receptor gamma, N-terminal; [IPR035500] …	Nucleoplasm;Vesicles (reliability'])					yes			MP:0005367 renal/urinary system phenotype; MP:0005370 liver/biliary system phenotype; MP:0005385 cardiovascular system phenotype; MP:0010768 mortality/aging; MP:0005369 muscle phenotype; MP:0005376 homeostasis/metabolism phenotype; MP:0005384 cellular phenotype; MP:0005378 growth/size/body region phenotype; MP:0005386 behavior/neurological phenotype; MP:0005387 immune system phenotype; MP:0002006…	[ORPHA:528] Berardinelli-Seip congenital lipodystrophy; [ORPHA:146] Differentiated thyroid carcinoma; [ORPHA:251579] Giant cell glioblastoma; [ORPHA:251576] Gliosarcoma; [ORPHA:79083] PPARG-related familial partial lipodystrophy	OMIM ID:601487 Peroxisome proliferator-activated receptor-gamma	Familial partial lipodystrophy 3; Insulin resistance; Obesity; Acanthosis nigricans; Abnormal oral glucose tolerance; Carcinoma of colon; Morbid obesity	Body Height;Depressive Disorder, Major;Plasminogen Activator Inhibitor 1;Platelet Function Tests;Testosterone;Tumor Necrosis Factor-alpha;Tunica Media;Waist-Hip Ratio	Anthropometry;Body Mass Index;Bronchodilator Agents;Chemical and Drug Induced Liver Injury;Cholesterol;Cholesterol, LDL;Diabetes Mellitus, Type 2;Gastrointestinal Microbiome;Hip;Insulin;Insulin Resistance;Leprosy;Lung Volume Measurements;Sex Characteristics		Body mass index, modifier of: risk factor; Carcinoma of colon: pathogenic; Diabetes mellitus, noninsulin-dependent, modifier of: risk factor; Diabetes mellitus, noninsulin-dependent, with acanthosis nigricans and hypertension: likely pathogenic,pathogenic,uncertain significance; Familial partial lipodystrophy: likely pathogenic,pathogenic,uncertain significance; Familial partial lipodystrophy 3: …	HP:0012273:Increased carotid artery intimal medial thickness; HP:0007457:Prominent veins on trunk; HP:0009017:Loss of gluteal subcutaneous adipose tissue; HP:0009042:Marked muscular hypertrophy; HP:0000292:Loss of facial adipose tissue; HP:0001015:Prominent superficial veins; HP:0012084:Abnormality of skeletal muscle fiber size; HP:0003414:Atlantoaxial dislocation; HP:0000991:Xanthomatosis; HP:01…	alpha-Linolenic acid; Icosapent; Troglitazone; Mesalazine; Valproic acid; Indomethacin; Rosiglitazone; Fenoprofen; Nateglinide; Sulfasalazine; Clofazimine; Repaglinide; Telmisartan; Balsalazide; Ibuprofen; Glipizide; Amiodarone; Pioglitazone; Mitiglinide; Bezafibrate; Flufenamic acid; Resveratrol; Phthalic Acid; Capric acid; Doconexent; Oleic Acid; (S)-3-(4-(2-Carbazol-9-Yl-Ethoxy)-Phenyl)-2-Etho…	BODY MASS INDEX, MODIFIER OF; Carotid Intimal Medial Thickness 1; DIABETES MELLITUS, NONINSULIN-DEPENDENT, MODIFIER OF; INTIMAL MEDIAL THICKNESS OF INTERNAL CAROTID ARTERY, MODIFIER OF; Increased carotid artery intimal medial thickness; OBESITY, MODIFIER OF; Passive Cutaneous Anaphylaxis; Patent Ductus Venosus; Chronic metabolic disorder; INSULIN RESISTANCE, SEVERE, DIGENIC; Leishmania mexicana d…	1867	2053	[{"UniProt":"E9PFX5","EnsemblGene":["ENSG00000132170"],"EnsemblTrans":[["ENST00000397000","ENSP00000380196",""]],"RefSeq":[["NM_001330615","NP_001317544","REVIEWED"]],"UCSC":["uc003bwv.4"],"SwissProt":["E9PFX5_HUMAN"]},{"UniProt":"P37231","EnsemblGene":["ENSG00000132170"],"RefSeq":[["NM_005037","NP_005028","REVIEWED"],["NM_138711","NP_619725","REVIEWED"],["NM_138712","NP_619726","REVIEWED"],["XM_…		Distribution: Detected in many; Specificity: Tissue enhanced	antibody: Squamous epithelia, glandular cells in gastrointestinal tract, gall bladder, urinary bladder, placenta, epididymis showed moderate to strong nuclear positivity. Remaining normal cells were weakly stained or negative.; Cytoplasmic and nuclear expression in several tissues.	Antibody: Selected cases of colorectal, breast, ovarian, cervical, thyroid, skin, urothelial, head and neck cancers, gliomas and lymphomas showed moderate to strong nuclear positivity. Remaining cancers were weakly stained or negative.
1	PTEN	5728	10q23del|BZS|CWS1|DEC|GLM2|MHAM|MMAC1|PTEN1|PTENbeta|TEP1	This gene was identified as a tumor suppressor that is mutated in a large number of cancers at high frequency. The protein encoded by this gene is a phosphatidylinositol-3,4,5-trisphosphate 3-phosphatase. It contains a tensin like domain as well as a catalytic domain similar to that of the dual specificity protein tyrosine phosphatases. Unlike most of the protein tyrosine phosphatases, this prote…	PTEN (Phosphatase And Tensin Homolog) is a Protein Coding gene. Diseases associated with PTEN include Cowden Syndrome 1 and Macrocephaly/Autism Syndrome. Among its related pathways are RET signaling and B cell receptor signaling pathway (KEGG). Gene Ontology (GO) annotations related to this gene include protein kinase binding and magnesium ion binding. An important paralog of this gene is TPTE2.	Tumor suppressor. Acts as a dual-specificity protein phosphatase, dephosphorylating tyrosine-, serine- and threonine-phosphorylated proteins. Also acts as a lipid phosphatase, removing the phosphate in the D3 position of the inositol ring from phosphatidylinositol 3,4,5-trisphosphate, phosphatidylinositol 3,4-diphosphate, phosphatidylinositol 3-phosphate and inositol 1,3,4,5-tetrakisphosphate wit…	29 39	26 37	28 47	29 34	phosphatase and tensin homolog	chr10:87863625-87971930	symbol	H. sapiens	protein-coding	This gene was identified as a tumor suppressor that is mutated in a large number of cancers at high frequency. The protein encoded by this gene is a phosphatidylinositol-3,4,5-trisphosphate 3-phosphatase. It contains a tensin like domain as well as a catalytic domain similar to that of the dual specificity protein tyrosine phosphatases. Unlike most of the protein tyrosine phosphatases, this prote…	GO:2000808 negative regulation of synaptic vesicle clustering;GO:0051548 negative regulation of keratinocyte migration;GO:1903984 positive regulation of TRAIL-activated apoptotic signaling pathway	[GO:0003674] molecular_function; [GO:0016791] phosphatase activity; [GO:0008150] biological_process; [GO:0006464] cellular protein modification process; [GO:0006629] lipid metabolic process; [GO:0009056] catabolic process; [GO:0044281] small molecule metabolic process; [GO:0005975] carbohydrate metabolic process; [GO:0008283] cell population proliferation; [GO:0007165] signal transduction; [GO:00…	GO:0035749 myelin sheath adaxonal region;GO:0043220 Schmidt-Lanterman incisure;GO:0043218 compact myelin	GO:0051800 phosphatidylinositol-3,4-bisphosphate 3-phosphatase activity;GO:0051717 inositol-1,3,4,5-tetrakisphosphate 3-phosphatase activity;GO:0106017 phosphatidylinositol-3,4-bisphosphate phosphatase activity		Predicted intracellular proteins; Disease related genes; ENZYME proteins:Hydrolases; Cancer-related genes:Mutational cancer driver genes; Predicted secreted proteins; Enzymes; Potential drug targets; Cancer-related genes:Mutated cancer genes	[IPR000340] Dual specificity phosphatase, catalytic domain; [IPR003595] Protein-tyrosine phosphatase, catalytic; [IPR014020] Tensin phosphatase, C2 domain; [IPR016130] Protein-tyrosine phosphatase, active site; [IPR017361] Bifunctional phosphatidylinositol trisphosphate phosphatase/dual specificity phosphatase PTEN; [IPR029021] Protein-tyrosine phosphatase-like; [IPR029023] Tensin-type phosphatas…	Nucleoplasm (reliability']); Additional: Cytosol	yes	yes						MP:0005367 renal/urinary system phenotype; MP:0005370 liver/biliary system phenotype; MP:0005385 cardiovascular system phenotype; MP:0010768 mortality/aging; MP:0005369 muscle phenotype; MP:0005376 homeostasis/metabolism phenotype; MP:0005384 cellular phenotype; MP:0005378 growth/size/body region phenotype; MP:0005386 behavior/neurological phenotype; MP:0005381 digestive/alimentary phenotype; MP:…	[ORPHA:397596] Activated PI3K-delta syndrome; [ORPHA:109] Bannayan-Riley-Ruvalcaba syndrome; [ORPHA:201] COWDEN SYNDROME; [ORPHA:145] Hereditary breast and ovarian cancer syndrome; [ORPHA:79076] Juvenile polyposis of infancy; [ORPHA:65285] LHERMITTE-DUCLOS DISEASE; [ORPHA:210548] Macrocephaly-intellectual disability-autism syndrome; [ORPHA:744] Proteus syndrome; [ORPHA:2969] Proteus-like syndrome…	OMIM ID:601728 Phosphatase and tensin homolog	Cowden syndrome 1; Intellectual disability; Macrocephaly/autism syndrome; PTEN hamartoma tumor syndrome; Cowden syndrome; Hereditary cancer-predisposing syndrome; Global developmental delay; not specified; Ovarian Neoplasms; PTEN-related disorder; Endometrial carcinoma; Autism spectrum disorder; Follicular thyroid carcinoma; Colpocephaly; Megalencephaly; Seizures; Macrocephalus; Loss of conscious…	Cholesterol;Cholesterol, LDL		[158350] Bannayan-Zonana syndrome; [158350] COWDEN DISEASE; [158350] LHERMITTE-DUCLOS DISEASE; [605309] MACROCEPHALY/AUTISM SYNDROME; [176920] Proteus syndrome; [276950] VACTERL association with hydrocephalus	Acute megakaryoblastic leukemia: pathogenic; Adenocarcinoma of prostate: likely pathogenic,pathogenic,uncertain significance; Adenocarcinoma of stomach: likely pathogenic,pathogenic,uncertain significance; Autistic disorder of childhood onset: likely pathogenic,pathogenic; Cowden syndrome: likely pathogenic,pathogenic; Cowden syndrome 1: likely pathogenic,pathogenic,uncertain significance; Clinva…	HP:0500009:Dysplastic gangliocytoma of the cerebellum; HP:0010797:Hemangioblastoma; HP:0030257:Freckled genitalia; HP:0200016:Acrokeratosis; HP:0002250:Abnormal large intestine morphology; HP:0100521:Neoplasm of the thymus; HP:0010516:Thymus hyperplasia; HP:0002597:Abnormality of the vasculature; HP:0000828:Abnormality of the parathyroid gland; HP:0012081:Enlarged cerebellum; HP:0006608:Midclavic…	Phosphatidylethanolamine	AIDS-Related Diffuse Large B-cell Lymphoma; Cervical Endometrioid Adenocarcinoma; Dysplastic gangliocytoma of cerebellum (Lhermitte-Duclos); Endometrial Cyst; GLIOMA SUSCEPTIBILITY 2; Gastric Choriocarcinoma; Glycogenic acanthosis; Hamartoma of skin; MELANOMA, CUTANEOUS MALIGNANT, 1; Malignant epithelial neoplasm of lung; Meningeal Gliomatosis; Metastases to abdominal cavity; Oral papillomatosis;…	2109	2300	[{"UniProt":"P60484","EnsemblGene":["ENSG00000171862"],"RefSeq":[["NM_001304717","NP_001291646","REVIEWED"],["NM_001304718","NP_001291647","REVIEWED"]],"SwissProt":["PTEN_HUMAN"]},{"UniProt":"F6KD01","RefSeq":[["NM_000314","NP_000305","REVIEWED"]],"SwissProt":["F6KD01_HUMAN"]}]		Distribution: Detected in all; Specificity: Low tissue specificity	antibody: Most normal cells were weakly stained in the cytoplasm or negative. Urinary bladder, spermatocytes but not spermatogonia and spermatides showed moderate cytoplasmic positivity.; Cytoplasmic expression in most tissues.	Antibody: Melanomas, ovarian and breast cancers showed moderate cytoplasmic positivity. Remaining cancer tissues were weakly stained or negative.
1	RAP1GDS1	5910	GDS1|SmgGDS	The smg GDP dissociation stimulator (smgGDS) protein is a stimulatory GDP/GTP exchange protein with GTPase activity (Riess et al., 1993 [PubMed 8262526]).[supplied by OMIM, Feb 2010]	RAP1GDS1 (Rap1 GTPase-GDP Dissociation Stimulator 1) is a Protein Coding gene. Among its related pathways are G-protein signaling_Regulation of RAC1 activity and Regulation of RAC1 activity. Gene Ontology (GO) annotations related to this gene include binding and proton-transporting ATPase activity, rotational mechanism.	Stimulates GDP/GTP exchange reaction of a group of small GTP-binding proteins (G proteins) including Rap1a/Rap1b, RhoA, RhoB and KRas, by stimulating the dissociation of GDP from and the subsequent binding of GTP to each small G protein. GDS1_HUMAN,P52306	16 22	12 18	22 42	21 30	Rap1 GTPase-GDP dissociation stimulator 1	chr4:98261381-98443858	symbol	H. sapiens	protein-coding	The smg GDP dissociation stimulator (smgGDS) protein is a stimulatory GDP/GTP exchange protein with GTPase activity (Riess et al., 1993 [PubMed 8262526]).[supplied by OMIM, Feb 2010]	GO:0031034 myosin filament assembly;GO:0031033 myosin filament organization;GO:0032471 negative regulation of endoplasmic reticulum calcium ion concentration	[GO:0003674] molecular_function; [GO:0030234] enzyme regulator activity; [GO:0008150] biological_process; [GO:0005575] cellular_component; [GO:0005737] cytoplasm; [GO:0005622] intracellular; [GO:0043226] organelle; [GO:0005783] endoplasmic reticulum; [GO:0005739] mitochondrion; [GO:0005829] cytosol; [GO:0005576] extracellular region; [GO:0005615] extracellular space; [GO:0042592] homeostatic proc…	GO:0005739 mitochondrion;GO:0005783 endoplasmic reticulum;GO:0070062 extracellular exosome	GO:0005096 GTPase activator activity;GO:0030695 GTPase regulator activity;GO:0060589 nucleoside-triphosphatase regulator activity		Predicted intracellular proteins; Cancer-related genes	[IPR000225] Armadillo; [IPR011989] Armadillo-like helical; [IPR016024] Armadillo-type fold; [IPR040144] Rap1 GTPase-GDP dissociation stimulator 1	Cytosol (reliability'])										OMIM ID:179502 Rap1, gtpase-gdp dissociation stimulator 1		Blood Flow Velocity;Lipids;Platelet Function Tests	Triglycerides					Ascending aorta dilatation; Severe dementia; Infant T Acute Lymphoblastic Leukemia; Adult T Acute Lymphoblastic Leukemia; Childhood T Acute Lymphoblastic Leukemia; Prostatic Intraepithelial Neoplasias; Lymphoid leukemia; Metastatic Prostate Carcinoma; Progression of prostate cancer; Forgetful; Mild cognitive disorder; Precursor T-Cell Lymphoblastic Leukemia-Lymphoma; Presenile dementia; Memory im…	25	57	[{"UniProt":"P52306","EnsemblGene":["ENSG00000138698"],"SwissProt":["GDS1_HUMAN"]},{"UniProt":"B3KNU0","RefSeq":[["NM_001100427","NP_001093897","VALIDATED"]],"SwissProt":["B3KNU0_HUMAN"]},{"UniProt":"Q6U7G8","RefSeq":[["NM_001100430","NP_001093900","VALIDATED"]],"SwissProt":["Q6U7G8_HUMAN"]}]		Distribution: Detected in all; Specificity: Low tissue specificity	antibody: Weak to moderate cytoplasmic positivity was seen in most normal tissues. The adrenal gland and neurons in CNS were strongly stained. Liver, bone marrow and smooth muscle cells were mostly negative.; Cytoplasmic expression in most tissues.	Antibody: Cancers were in general weakly stained or negative. Moderate cytoplasmic immunoreactivity was observed in cases of melanoma, colorectal, breast and urothelial cancers.
1	RB1	5925	OSRC|PPP1R130|RB|p105-Rb|p110-RB1|pRb|pp110	The protein encoded by this gene is a negative regulator of the cell cycle and was the first tumor suppressor gene found. The encoded protein also stabilizes constitutive heterochromatin to maintain the overall chromatin structure. The active, hypophosphorylated form of the protein binds transcription factor E2F1. Defects in this gene are a cause of childhood cancer retinoblastoma (RB), bladder c…	RB1 (RB Transcriptional Corepressor 1) is a Protein Coding gene. Diseases associated with RB1 include Retinoblastoma and Small Cell Cancer Of The Lung. Among its related pathways are E2F transcription factor network and Mitotic Prophase. Gene Ontology (GO) annotations related to this gene include DNA-binding transcription factor activity and enzyme binding. An important paralog of this gene is RB…	Key regulator of entry into cell division that acts as a tumor suppressor. Promotes G0-G1 transition when phosphorylated by CDK3/cyclin-C. Acts as a transcription repressor of E2F1 target genes. The underphosphorylated, active form of RB1 interacts with E2F1 and represses its transcription activity, leading to cell cycle arrest. Directly involved in heterochromatin formation by maintaining overal…	24 37	27 42	21 42	17 21	RB transcriptional corepressor 1	chr13:48303751-48481890	symbol	H. sapiens	protein-coding	The protein encoded by this gene is a negative regulator of the cell cycle and was the first tumor suppressor gene found. The encoded protein also stabilizes constitutive heterochromatin to maintain the overall chromatin structure. The active, hypophosphorylated form of the protein binds transcription factor E2F1. Defects in this gene are a cause of childhood cancer retinoblastoma (RB), bladder c…	GO:1904028 positive regulation of collagen fibril organization;GO:0071930 negative regulation of transcription involved in G1/S transition of mitotic cell cycle;GO:1902948 negative regulation of tau-protein kinase activity	[GO:0008150] biological_process; [GO:0034641] cellular nitrogen compound metabolic process; [GO:0009058] biosynthetic process; [GO:0008219] cell death; [GO:0007049] cell cycle; [GO:0003674] molecular_function; [GO:0008134] transcription factor binding; [GO:0008283] cell population proliferation; [GO:0000278] mitotic cell cycle; [GO:0005575] cellular_component; [GO:0005622] intracellular; [GO:0043…	GO:0035189 Rb-E2F complex;GO:0008024 cyclin/CDK positive transcription elongation factor complex;GO:0019908 nuclear cyclin-dependent protein kinase holoenzyme complex	GO:0061676 importin-alpha family protein binding;GO:0097718 disordered domain specific binding;GO:0001102 RNA polymerase II activating transcription factor binding		Predicted intracellular proteins; Disease related genes; Cancer-related genes:Candidate cancer biomarkers; Cancer-related genes:Mutational cancer driver genes; Cancer-related genes:Mutated cancer genes	[IPR028309] Retinoblastoma protein family; [IPR033057] Retinoblastoma-associated protein; [IPR002719] Retinoblastoma-associated protein, B-box; [IPR002720] Retinoblastoma-associated protein, A-box; [IPR013763] Cyclin-like; [IPR015030] Retinoblastoma-associated protein, C-terminal; [IPR024599] Retinoblastoma-associated protein, N-terminal; [IPR036915] Cyclin-like superfamily	Nucleoplasm (reliability'])					yes	principal1		MP:0005370 liver/biliary system phenotype; MP:0005385 cardiovascular system phenotype; MP:0010768 mortality/aging; MP:0005369 muscle phenotype; MP:0005376 homeostasis/metabolism phenotype; MP:0005384 cellular phenotype; MP:0005378 growth/size/body region phenotype; MP:0005386 behavior/neurological phenotype; MP:0005381 digestive/alimentary phenotype; MP:0005387 immune system phenotype; MP:0002006…	[ORPHA:357027] Hereditary retinoblastoma; [ORPHA:1587] Monosomy 13q14; [ORPHA:357034] Non-hereditary retinoblastoma; [ORPHA:668] OSTEOSARCOMA; [ORPHA:70573] Small cell lung cancer	OMIM ID:614041 Rb transcriptional corepressor 1	Lip and oral cavity carcinoma; Retinoblastoma; Ichthyosis (disease); Hereditary cancer-predisposing syndrome; Hereditary nonpolyposis colorectal cancer type 4; Hypotrichosis 8; Small cell lung cancer; Neoplasm; Retinoblastoma, trilateral; Osteosarcoma; Urinary bladder cancer; Vulvar adenocarcinoma of mammary gland type; Autosomal recessive woolly hair 1, with or without hypotrichosis	Triglycerides	Bronchodilator Agents;Lung Volume Measurements;Renal Insufficiency, Chronic		Autosomal recessive woolly hair 1, with or without hypotrichosis: pathogenic; Clinvar: phenotype not specified: likely pathogenic,pathogenic,uncertain significance; Hypotrichosis 8: pathogenic; Hereditary cancer-predisposing syndrome: likely pathogenic,pathogenic,uncertain significance; Neoplasm: likely pathogenic,pathogenic,uncertain significance; Retinoblastoma: likely pathogenic,pathogenic,unc…	HP:0010799:Pinealoma; HP:0007862:Retinal calcification; HP:0009919:Retinoblastoma; HP:0006491:Abnormality of the tibial metaphysis; HP:0000555:Leukocoria; HP:0006489:Abnormality of the femoral metaphysis; HP:0012254:Ewing sarcoma; HP:0011531:Vitritis; HP:0002669:Osteosarcoma; HP:0007902:Vitreous hemorrhage; HP:0011024:Abnormality of the gastrointestinal tract; HP:0009601:Aplasia/Hypoplasia of the…	Insulin human; Insulin pork	Chromosome 13q14 deletion syndrome; Malignant neoplasm of retina; COLORECTAL CANCER, HEREDITARY NONPOLYPOSIS, TYPE 4; Retinal calcification; Trichodiscoma; Vulvar Adenocarcinoma of Mammary Gland Type; WOOLLY HAIR, AUTOSOMAL RECESSIVE 1, WITH OR WITHOUT HYPOTRICHOSIS; Abnormality of the tibial metaphysis; Intraurothelial Neoplasia; Retinoblastoma unilateral; Trilateral Retinoblastoma; Abnormality …	745	1244	[{"UniProt":"P06400","EnsemblGene":["ENSG00000139687"],"EnsemblTrans":[["ENST00000267163","ENSP00000267163","principal1"]],"RefSeq":[["NM_000321","NP_000312","REVIEWED"]],"UCSC":["uc001vcb.4"],"SwissProt":["RB_HUMAN"]},{"UniProt":"A0A024RDV3","RefSeq":[["NM_000321","NP_000312","REVIEWED"]],"SwissProt":["A0A024RDV3_HUMAN"]}]		Distribution: Detected in all; Specificity: Low tissue specificity	Nuclear expression in most tissues, including retina.
1	RET	5979	CDHF12|CDHR16|HSCR1|MEN2A|MEN2B|MTC1|PTC|RET-ELE1	This gene encodes a transmembrane receptor and member of the tyrosine protein kinase family of proteins. Binding of ligands such as GDNF (glial cell-line derived neurotrophic factor) and other related proteins to the encoded receptor stimulates receptor dimerization and activation of downstream signaling pathways that play a role in cell differentiation, growth, migration and survival. The encode…	RET (Ret Proto-Oncogene) is a Protein Coding gene. Diseases associated with RET include Multiple Endocrine Neoplasia, Type Iia and Thyroid Carcinoma, Familial Medullary. Among its related pathways are Neuroscience and GDNF-Family Ligands and Receptor Interactions. Gene Ontology (GO) annotations related to this gene include calcium ion binding and protein kinase activity. An important paralog of t…	Receptor tyrosine-protein kinase involved in numerous cellular mechanisms including cell proliferation, neuronal navigation, cell migration, and cell differentiation upon binding with glial cell derived neurotrophic factor family ligands. Phosphorylates PTK2/FAK1. Regulates both cell death/survival balance and positional information. Required for the molecular mechanisms orchestration during inte…	6 5	6 5	6 4	10 11	ret proto-oncogene	chr10:43077069-43130351	symbol	H. sapiens	protein-coding	This gene encodes a transmembrane receptor and member of the tyrosine protein kinase family of proteins. Binding of ligands such as GDNF (glial cell-line derived neurotrophic factor) and other related proteins to the encoded receptor stimulates receptor dimerization and activation of downstream signaling pathways that play a role in cell differentiation, growth, migration and survival. The encode…	GO:0007497 posterior midgut development;GO:0061146 Peyer's patch morphogenesis;GO:0035799 ureter maturation	[GO:0003674] molecular_function; [GO:0043167] ion binding; [GO:0005575] cellular_component; [GO:0008150] biological_process; [GO:0007155] cell adhesion; [GO:0006464] cellular protein modification process; [GO:0016301] kinase activity; [GO:0005886] plasma membrane; [GO:0005737] cytoplasm; [GO:0005622] intracellular; [GO:0043226] organelle; [GO:0031410] cytoplasmic vesicle; [GO:0005768] endosome; […	GO:0045121 membrane raft;GO:0098857 membrane microdomain;GO:0098589 membrane region	GO:0004714 transmembrane receptor protein tyrosine kinase activity;GO:0019199 transmembrane receptor protein kinase activity;GO:0004713 protein tyrosine kinase activity	Tyr protein kinase family	Predicted intracellular proteins; FDA approved drug targets:Small molecule drugs; Disease related genes; Cancer-related genes:Candidate cancer biomarkers; Enzymes; Kinases:Tyr protein kinases; ENZYME proteins:Transferases	[IPR000719] Protein kinase domain; [IPR001245] Serine-threonine/tyrosine-protein kinase, catalytic domain; [IPR002126] Cadherin-like; [IPR008266] Tyrosine-protein kinase, active site; [IPR011009] Protein kinase-like domain superfamily; [IPR015919] Cadherin-like superfamily; [IPR016249] Tyrosine-protein kinase, Ret receptor; [IPR017441] Protein kinase, ATP binding site; [IPR020635] Tyrosine-protei…	Cytosol;Golgi apparatus (reliability']); Additional: Plasma membrane			yes	yes	yes		yes	MP:0005367 renal/urinary system phenotype; MP:0010768 mortality/aging; MP:0005369 muscle phenotype; MP:0005376 homeostasis/metabolism phenotype; MP:0005384 cellular phenotype; MP:0005378 growth/size/body region phenotype; MP:0005386 behavior/neurological phenotype; MP:0005381 digestive/alimentary phenotype; MP:0002006 neoplasm; MP:0005389 reproductive system phenotype; MP:0003631 nervous system p…	[ORPHA:146] Differentiated thyroid carcinoma; [ORPHA:99361] Familial medullary thyroid carcinoma; [ORPHA:99803] Haddad syndrome; [ORPHA:29072] Hereditary pheochromocytoma-paraganglioma; [ORPHA:388] Hirschsprung disease; [ORPHA:247698] Multiple endocrine neoplasia type 2A; [ORPHA:247709] Multiple endocrine neoplasia type 2B; [ORPHA:1848] Renal agenesis bilateral; [ORPHA:93100] Renal agenesis unila…	OMIM ID:164761 Rearranged during transfection protooncogene	Multiple endocrine neoplasia, type 2; Aganglionic megacolon; Hirschsprung disease 1; Hereditary cancer-predisposing syndrome; Hirschsprung disease; Sensorineural hearing loss; Multiple endocrine neoplasia, type 2a; Inborn genetic diseases; not specified; Multiple endocrine neoplasia, type 1; Medullary thyroid carcinoma; Multiple endocrine neoplasia, type 4; Multiple endocrine neoplasia, type 2b; …	Antihypertensive Agents;Cholesterol, HDL	Hirschsprung Disease;Marijuana Abuse	[162300] Multiple endocrine neoplasia IIB; [191830] RENAL AGENESIS	Central hypoventilation syndrome, congenital, with hirschsprung disease: not provided,pathogenic,uncertain significance; Clinvar: phenotype not specified: likely pathogenic,not provided,pathogenic,risk factor,uncertain significance; Congenital central hypoventilation: likely pathogenic,pathogenic; Familial medullary thyroid carcinoma: likely pathogenic,not provided,pathogenic,uncertain significan…	HP:0004362:Abnormality of enteric ganglion morphology; HP:0011781:Thyroid C cell hyperplasia; HP:0032346:Cutaneous lichen amyloidosis; HP:0011978:Elevated urinary vanillylmandelic acid; HP:0001574:Abnormality of the integument; HP:0002865:Medullary thyroid carcinoma; HP:0004387:Enterocolitis; HP:0006461:Proximal femoral epiphysiolysis; HP:0005994:Nodular goiter; HP:0008208:Parathyroid hyperplasia…	Sorafenib; 1-Ter-Butyl-3-P-Tolyl-1h-Pyrazolo[3,4-D]Pyrimidin-4-Ylamine; Vandetanib; Cabozantinib; Regorafenib; Ponatinib; Lenvatinib; Fostamatinib; Amuvatinib; Selpercatinib	Abnormality of enteric ganglion morphology; Congenital intestinal obstruction; Cutaneous lichen amyloidosis; MULTIPLE ENDOCRINE NEOPLASIA, TYPE IIA, WITH HIRSCHSPRUNG DISEASE; MULTIPLE ENDOCRINE NEOPLASIA, TYPE IIA, WITHOUT PHEOCHROMOCYTOMA; recurrent medullary thyroid cancer; thyroid nodule solitary; Childhood Thyroid Gland Papillary Carcinoma; Congenital unilateral absence; Elevated urinary van…	686	869	[{"UniProt":"P07949","EnsemblGene":["ENSG00000165731"],"SwissProt":["RET_HUMAN"]},{"UniProt":"A0A024R7T2","RefSeq":[["NM_020975","NP_066124","REVIEWED"]],"SwissProt":["A0A024R7T2_HUMAN"]}]		Distribution: Detected in many; Specificity: Tissue enhanced	antibody: Exocrine pancreas, salivary gland, macrophages and parathyroid gland displayed strong cytoplasmic staining. Neuronal cells were moderately stained. Most remaining normal tissues were negative.; Cytoplasmic expression at variable levels in several tissues, mainly in parathyroid gland.	Antibody: Melanomas, prostate cancers, liver cancers and a few cases of gliomas displayed moderate to strong cytoplasmic staining. Remaining tumors were in general weakly stained or negative.
1	S100A7	6278	PSOR1|S100A7c	The protein encoded by this gene is a member of the S100 family of proteins containing 2 EF-hand calcium-binding motifs. S100 proteins are localized in the cytoplasm and/or nucleus of a wide range of cells, and involved in the regulation of a number of cellular processes such as cell cycle progression and differentiation. S100 genes include at least 13 members which are located as a cluster on ch…	S100A7 (S100 Calcium Binding Protein A7) is a Protein Coding gene. Diseases associated with S100A7 include Bladder Squamous Cell Carcinoma and Anal Fistula. Among its related pathways are Validated targets of C-MYC transcriptional repression and Innate Immune System. Gene Ontology (GO) annotations related to this gene include calcium ion binding and RAGE receptor binding. An important paralog of …		3	2	3	3	S100 calcium binding protein A7	chr1:153460651-153457744	symbol	H. sapiens	protein-coding	The protein encoded by this gene is a member of the S100 family of proteins containing 2 EF-hand calcium-binding motifs. S100 proteins are localized in the cytoplasm and/or nucleus of a wide range of cells, and involved in the regulation of a number of cellular processes such as cell cycle progression and differentiation. S100 genes include at least 13 members which are located as a cluster on ch…	GO:0010820 positive regulation of T cell chemotaxis;GO:0051238 sequestering of metal ion;GO:0010819 regulation of T cell chemotaxis	[GO:0003674] molecular_function; [GO:0043167] ion binding; [GO:0005575] cellular_component; [GO:0005622] intracellular; [GO:0043226] organelle; [GO:0005634] nucleus; [GO:0005737] cytoplasm; [GO:0005783] endoplasmic reticulum; [GO:0005829] cytosol; [GO:0005576] extracellular region; [GO:0005615] extracellular space; [GO:0008150] biological_process; [GO:0006950] response to stress; [GO:0002376] imm…	GO:0035578 azurophil granule lumen;GO:0005766 primary lysosome;GO:0042582 azurophil granule	GO:0050786 RAGE receptor binding;GO:0048306 calcium-dependent protein binding;GO:0005509 calcium ion binding		Cancer-related genes:Candidate cancer biomarkers; Predicted secreted proteins; Predicted intracellular proteins	[IPR001751] S100/Calbindin-D9k, conserved site; [IPR002048] EF-hand domain; [IPR011992] EF-hand domain pair; [IPR013787] S100/CaBP-9k-type, calcium binding, subdomain; [IPR018247] EF-Hand 1, calcium-binding site; [IPR028477] Protein S100-A7; [IPR034325] S-100	Cytosol (reliability'])	yes	yes			yes	principal1				OMIM ID:600353 S100 calcium-binding protein a7			Hippocampus				Ibuprofen; Zinc; 8-anilinonaphthalene-1-sulfonic acid; Dexibuprofen; Zinc acetate; Zinc chloride; Zinc sulfate, unspecified form	Short palate; Fungus ball; Mucosal Infection; Recurrent pterygium; Vulvovaginitis; Refsum Disease; Psoriatic plaque; Trichiasis; Familial psoriasis; Conjunctival scar; Polymorphous light eruption; Female Genital Diseases; Middle Ear Cholesteatoma; EPIDERMAL DIFFERENTIATION COMPLEX; Congenital emphysema; Triglyceride storage disease with ichthyosis; Root Resorption; Juvenile angiofibroma; Angiofib…	101	165	[{"UniProt":"P31151","EnsemblGene":["ENSG00000143556"],"EnsemblTrans":[["ENST00000368722","ENSP00000357711","principal1"],["ENST00000368723","ENSP00000357712","principal1"]],"RefSeq":[["NM_002963","NP_002954","REVIEWED"]],"UCSC":["uc001fbv.2"],"SwissProt":["S10A7_HUMAN"]}]	larynx	Distribution: Detected in some; Specificity: Tissue enhanced	antibody: Squamous epithelia showed moderate to strong nuclear and cytoplasmic positivity. Remaining normal cells were negative.; Expression in squamous epithelia.	Antibody: Squamous cell carcinomas showed strong cytoplasmic and nuclear positivity. Single cases of uterine, bladder, gastric and pancreatic carcinomas were positive. Remaining malignancies were negative.
1	SBDS	51119	CGI-97|SDS|SWDS	This gene encodes a highly conserved protein that plays an essential role in ribosome biogenesis. The encoded protein interacts with elongation factor-like GTPase 1 to disassociate eukaryotic initiation factor 6 from the late cytoplasmic pre-60S ribosomal subunit allowing assembly of the 80S subunit. Mutations within this gene are associated with the autosomal recessive disorder Shwachman-Bodian-…	SBDS (SBDS Ribosome Maturation Factor) is a Protein Coding gene. Diseases associated with SBDS include Shwachman-Diamond Syndrome 1 and Aplastic Anemia. Among its related pathways are Ribosome biogenesis in eukaryotes. Gene Ontology (GO) annotations related to this gene include rRNA binding.	Required for the assembly of mature ribosomes and ribosome biogenesis. Together with EFL1, triggers the GTP-dependent release of EIF6 from 60S pre-ribosomes in the cytoplasm, thereby activating ribosomes for translation competence by allowing 80S ribosome assembly and facilitating EIF6 recycling to the nucleus, where it is required for 60S rRNA processing and nuclear export. Required for normal l…	97 103	120 107	76 88	64 65	SBDS ribosome maturation factor	chr7:66995586-66987680	symbol	H. sapiens	protein-coding	This gene encodes a highly conserved protein that plays an essential role in ribosome biogenesis. The encoded protein interacts with elongation factor-like GTPase 1 to disassociate eukaryotic initiation factor 6 from the late cytoplasmic pre-60S ribosomal subunit allowing assembly of the 80S subunit. Mutations within this gene are associated with the autosomal recessive disorder Shwachman-Bodian-…	GO:0042256 mature ribosome assembly;GO:0048539 bone marrow development;GO:0001833 inner cell mass cell proliferation	[GO:0008150] biological_process; [GO:0042254] ribosome biogenesis; [GO:0005575] cellular_component; [GO:0005622] intracellular; [GO:0043226] organelle; [GO:0005634] nucleus; [GO:0003674] molecular_function; [GO:0003723] RNA binding; [GO:0005737] cytoplasm; [GO:0005654] nucleoplasm; [GO:0005829] cytosol; [GO:0005856] cytoskeleton; [GO:0005730] nucleolus; [GO:0019843] rRNA binding; [GO:0034641] cel…	GO:0000922 spindle pole;GO:0005819 spindle;GO:0015630 microtubule cytoskeleton	GO:0043022 ribosome binding;GO:0019843 rRNA binding;GO:0043021 ribonucleoprotein complex binding		Predicted intracellular proteins; Disease related genes; Cancer-related genes	[IPR018023] Ribosome maturation protein SBDS, conserved site; [IPR018978] Ribosome maturation protein SBDS, C-terminal; [IPR019783] Ribosome maturation protein SBDS, N-terminal; [IPR036786] Ribosome maturation protein SBDS, N-terminal domain superfamily; [IPR037188] Ribosome maturation protein Sdo1/SBDS, central domain superfamily; [IPR039100] Ribosome maturation protein Sdo1/SBDS-like; [IPR00214…	Cytosol;Nucleoplasm (reliability'])					yes	principal2		MP:0005370 liver/biliary system phenotype; MP:0005385 cardiovascular system phenotype; MP:0010768 mortality/aging; MP:0005376 homeostasis/metabolism phenotype; MP:0005384 cellular phenotype; MP:0005378 growth/size/body region phenotype; MP:0005381 digestive/alimentary phenotype; MP:0005387 immune system phenotype; MP:0005390 skeleton phenotype; MP:0005397 hematopoietic system phenotype; MP:000537…	[ORPHA:88] Idiopathic aplastic anemia; [ORPHA:811] SHWACHMAN-DIAMOND SYNDROME	OMIM ID:607444 Sbds gene	Shwachman-Diamond syndrome 1; Agenesis of permanent teeth; Microcephaly; Short stature; Deeply set eye; Splenomegaly; Inborn genetic diseases			[260400] SHWACHMAN-DIAMOND SYNDROME	Aplastic anemia, susceptibility to: pathogenic,risk factor; Clinvar: phenotype not specified: likely pathogenic,pathogenic,risk factor; Inborn genetic diseases: pathogenic,risk factor; Short stature: likely pathogenic,pathogenic,risk factor; Shwachman syndrome: pathogenic,risk factor	HP:0006598:Irregular ossification at anterior rib ends; HP:0001700:Myocardial necrosis; HP:0006461:Proximal femoral epiphysiolysis; HP:0008803:Narrow sacroiliac notch; HP:0003411:Proximal femoral metaphyseal irregularity; HP:0004979:Metaphyseal sclerosis; HP:0000920:Enlargement of the costochondral junction; HP:0011904:Persistence of hemoglobin F; HP:0000907:Anterior rib cupping; HP:0005871:Metap…		APLASTIC ANEMIA, SUSCEPTIBILITY TO (finding); Irregular ossification at anterior rib ends; Tooth absent; Metaphyseal sclerosis; Narrow sacroiliac notch; Proximal femoral metaphyseal irregularity; SHWACHMAN-DIAMOND SYNDROME 1; Enlargement of the costochondral junction; Persistence of hemoglobin F; Anterior rib cupping; Inherited bone marrow failure syndrome; Hypoplastic anemia; Aplastic anemia, id…	44	76	[{"UniProt":"Q9Y3A5","EnsemblGene":["ENSG00000126524"],"EnsemblTrans":[["ENST00000246868","ENSP00000246868","principal2"]],"RefSeq":[["NM_016038","NP_057122","REVIEWED"]],"UCSC":["uc003tvm.2"],"SwissProt":["SBDS_HUMAN"]},{"UniProt":"A0A0S2Z5I7","RefSeq":[["NM_016038","NP_057122","REVIEWED"]],"SwissProt":["A0A0S2Z5I7_HUMAN"]}]		Distribution: Detected in all; Specificity: Low tissue specificity	General cytoplasmic expression.; antibody: Most of the normal tissues displayed moderate cytoplasmic and occasional nuclear positivity.	Antibody: Malignant tissues exhibited weak to moderate immunoreactivity. A majority of malignant carcinoids, lymphomas and cervical cancers were negative.
1	SDHC	6391	CYB560|CYBL|PGL3|QPS1|SDH3	This gene encodes one of four nuclear-encoded subunits that comprise succinate dehydrogenase, also known as mitochondrial complex II, a key enzyme complex of the tricarboxylic acid cycle and aerobic respiratory chains of mitochondria. The encoded protein is one of two integral membrane proteins that anchor other subunits of the complex, which form the catalytic core, to the inner mitochondrial me…	SDHC (Succinate Dehydrogenase Complex Subunit C) is a Protein Coding gene. Diseases associated with SDHC include Paragangliomas 3 and Paraganglioma And Gastric Stromal Sarcoma. Among its related pathways are Respiratory electron transport, ATP synthesis by chemiosmotic coupling, and heat production by uncoupling proteins. and Parkinson disease. Gene Ontology (GO) annotations related to this gene …	Membrane-anchoring subunit of succinate dehydrogenase (SDH) that is involved in complex II of the mitochondrial electron transport chain and is responsible for transferring electrons from succinate to ubiquinone (coenzyme Q). C560_HUMAN,Q99643	56 69	53 48	77 74	61 71	succinate dehydrogenase complex subunit C	chr1:161314381-161375340	symbol	H. sapiens	protein-coding	This gene encodes one of four nuclear-encoded subunits that comprise succinate dehydrogenase, also known as mitochondrial complex II, a key enzyme complex of the tricarboxylic acid cycle and aerobic respiratory chains of mitochondria. The encoded protein is one of two integral membrane proteins that anchor other subunits of the complex, which form the catalytic core, to the inner mitochondrial me…	GO:0006121 mitochondrial electron transport, succinate to ubiquinone;GO:0006099 tricarboxylic acid cycle;GO:0006101 citrate metabolic process	[GO:0003674] molecular_function; [GO:0016491] oxidoreductase activity; [GO:0008150] biological_process; [GO:0006091] generation of precursor metabolites and energy; [GO:0005575] cellular_component; [GO:0043167] ion binding; [GO:0005737] cytoplasm; [GO:0005622] intracellular; [GO:0043226] organelle; [GO:0005739] mitochondrion; [GO:0032991] protein-containing complex	GO:0005749 mitochondrial respiratory chain complex II, succinate dehydrogenase complex (ubiquinone);GO:0045257 succinate dehydrogenase complex (ubiquinone);GO:0045273 respiratory chain complex II	GO:0000104 succinate dehydrogenase activity;GO:0016627 oxidoreductase activity, acting on the CH-CH group of donors;GO:0009055 electron transfer activity		Citric acid cycle related proteins; Disease related genes; Cancer-related genes; Predicted intracellular proteins	[IPR000701] Succinate dehydrogenase/fumarate reductase type B, transmembrane subunit; [IPR018495] Succinate dehydrogenase, cytochrome b subunit, conserved site; [IPR034804] Fumarate reductase/succinate dehydrogenase, transmembrane subunit; [IPR014314] Succinate dehydrogenase, cytochrome b556 subunit				yes	yes			yes	MP:0010768 mortality/aging; MP:0005369 muscle phenotype; MP:0005376 homeostasis/metabolism phenotype; MP:0005384 cellular phenotype; MP:0005378 growth/size/body region phenotype; MP:0005386 behavior/neurological phenotype; MP:0005390 skeleton phenotype; MP:0005375 adipose tissue phenotype	[ORPHA:97286] Carney-Stratakis syndrome; [ORPHA:201] COWDEN SYNDROME; [ORPHA:44890] Gastrointestinal stromal tumor; [ORPHA:29072] Hereditary pheochromocytoma-paraganglioma	OMIM ID:602413 Succinate dehydrogenase complex, subunit c, integral membrane protein, 15-kd	Paragangliomas 3; Gastrointestinal stromal tumor; Hereditary cancer-predisposing syndrome; Carney triad; Hereditary Paraganglioma-Pheochromocytoma Syndromes					HP:0003334:Elevated circulating catecholamine level; HP:0001686:Loss of voice; HP:0002640:Hypertension associated with pheochromocytoma; HP:0003001:Glomus jugular tumor; HP:0030074:Chemodectoma; HP:0007378:Neoplasm of the gastrointestinal tract; HP:0100751:Esophageal neoplasm; HP:0000036:Abnormality of the penis; HP:0100833:Neoplasm of the small intestine; HP:0001067:Neurofibromas; HP:0100780:Con…	2-Hexyloxy-6-Hydroxymethyl-Tetrahydro-Pyran-3,4,5-Triol; Ubiquinone Q1	Cardiac Paraganglioma; PARAGANGLIOMAS 3; Elevated circulating catecholamine level; Pulmonary chondroma; Sympathetic paraganglioma; Aphonia; Hypertension associated with pheochromocytoma; PARAGANGLIOMAS 4; Glomus Jugulare Tumor; Carotid Body Paraganglioma; Abnormality of the penis; Neoplasm of small intestine; Bilateral pheochromocytoma and islet cell adenoma of the pancreas; Conjunctival hamartom…	53	81	[{"UniProt":"Q99643","EnsemblGene":["ENSG00000143252"],"SwissProt":["C560_HUMAN"]},{"UniProt":"A0A0S2Z4B7","RefSeq":[["NM_003001","NP_002992","REVIEWED"]],"SwissProt":["A0A0S2Z4B7_HUMAN"]},{"UniProt":"A0A0S2Z4C9","RefSeq":[["NM_001035513","NP_001030590","REVIEWED"]],"SwissProt":["A0A0S2Z4C9_HUMAN"]}]		Distribution: Detected in all; Specificity: Low tissue specificity
1	SDHD	6392	CBT1|CII-4|CWS3|PGL|PGL1|QPs3|SDH4|cybS	This gene encodes a member of complex II of the respiratory chain, which is responsible for the oxidation of succinate. The encoded protein is one of two integral membrane proteins anchoring the complex to the matrix side of the mitochondrial inner membrane. Mutations in this gene are associated with the formation of tumors, including hereditary paraganglioma. Transmission of disease occurs almos…	SDHD (Succinate Dehydrogenase Complex Subunit D) is a Protein Coding gene. Diseases associated with SDHD include Paraganglioma And Gastric Stromal Sarcoma and Paragangliomas 1. Among its related pathways are Respiratory electron transport, ATP synthesis by chemiosmotic coupling, and heat production by uncoupling proteins. and Parkinson disease. Gene Ontology (GO) annotations related to this gene …	Membrane-anchoring subunit of succinate dehydrogenase (SDH) that is involved in complex II of the mitochondrial electron transport chain and is responsible for transferring electrons from succinate to ubiquinone (coenzyme Q). DHSD_HUMAN,O14521	75 101	78 69	88 112	78 91	succinate dehydrogenase complex subunit D	chr11:112086873-112095794	symbol	H. sapiens	protein-coding	This gene encodes a member of complex II of the respiratory chain, which is responsible for the oxidation of succinate. The encoded protein is one of two integral membrane proteins anchoring the complex to the matrix side of the mitochondrial inner membrane. Mutations in this gene are associated with the formation of tumors, including hereditary paraganglioma. Transmission of disease occurs almos…	GO:0006121 mitochondrial electron transport, succinate to ubiquinone;GO:0006099 tricarboxylic acid cycle;GO:0006101 citrate metabolic process	[GO:0005575] cellular_component; [GO:0003674] molecular_function; [GO:0043167] ion binding; [GO:0008150] biological_process; [GO:0006091] generation of precursor metabolites and energy; [GO:0005737] cytoplasm; [GO:0005622] intracellular; [GO:0043226] organelle; [GO:0005739] mitochondrion; [GO:0016491] oxidoreductase activity; [GO:0032991] protein-containing complex	GO:0005749 mitochondrial respiratory chain complex II, succinate dehydrogenase complex (ubiquinone);GO:0045257 succinate dehydrogenase complex (ubiquinone);GO:0045273 respiratory chain complex II	GO:0000104 succinate dehydrogenase activity;GO:0048039 ubiquinone binding;GO:0048038 quinone binding		Predicted intracellular proteins; FDA approved drug targets:Small molecule drugs; Disease related genes; Cancer-related genes; Citric acid cycle related proteins	[IPR007992] Succinate dehydrogenase [ubiquinone] cytochrome b small subunit, CybS; [IPR034804] Fumarate reductase/succinate dehydrogenase, transmembrane subunit				yes	yes				MP:0005385 cardiovascular system phenotype; MP:0010768 mortality/aging; MP:0005376 homeostasis/metabolism phenotype; MP:0005384 cellular phenotype; MP:0005378 growth/size/body region phenotype; MP:0005386 behavior/neurological phenotype; MP:0003631 nervous system phenotype; MP:0005379 endocrine/exocrine gland phenotype; MP:0005380 embryo phenotype	[ORPHA:100093] Carcinoid syndrome; [ORPHA:97286] Carney-Stratakis syndrome; [ORPHA:201] COWDEN SYNDROME; [ORPHA:29072] Hereditary pheochromocytoma-paraganglioma; [ORPHA:3208] Isolated succinate-CoQ reductase deficiency; [ORPHA:276624] Sporadic pheochromocytoma; [ORPHA:276621] Sporadic pheochromocytoma/secreting paraganglioma	OMIM ID:602690 Succinate dehydrogenase complex, subunit d, integral membrane protein	Pheochromocytoma; Cowden syndrome; Paragangliomas 1; Carney-Stratakis syndrome; Cowden syndrome 3; Hereditary cancer-predisposing syndrome; Hereditary Paraganglioma-Pheochromocytoma Syndromes; not specified; Mitochondrial complex II deficiency; Fatal infantile mitochondrial cardiomyopathy; Carotid body paraganglioma; Paragangliomas 1 with sensorineural hearing loss	Interleukin-18;Myocardial Infarction			Chemodectoma: pathogenic; Clinvar: phenotype not specified: likely pathogenic,pathogenic,uncertain significance; Fatal infantile mitochondrial cardiomyopathy: likely pathogenic,pathogenic,uncertain significance; Hereditary paraganglioma-pheochromocytoma syndromes: likely pathogenic,pathogenic,uncertain significance; Hereditary cancer-predisposing syndrome: likely pathogenic,pathogenic,uncertain s…	HP:0006723:Intestinal carcinoid; HP:0031138:Abnormal B-type natriuretic peptide level; HP:0006715:Glomus tympanicum paraganglioma; HP:0002886:Vagal paraganglioma; HP:0025474:Erythematous plaque; HP:0006722:Small intestine carcinoid; HP:0030446:Atypical pulmonary carcinoid tumor; HP:0030145:Lack of bowel sounds; HP:0003334:Elevated circulating catecholamine level; HP:0001686:Loss of voice; HP:0002…	Hexachlorophene; 2-Hexyloxy-6-Hydroxymethyl-Tetrahydro-Pyran-3,4,5-Triol; Ubiquinone Q1	Abnormal B-type natriuretic peptide level; Carotid paraganglioma; Cauda Equina Paraganglioma; Fatal infantile mitochondrial cardiomyopathy; PARAGANGLIOMAS 1 WITH SENSORINEURAL HEARING LOSS; Paragangliomas with Sensorineural Hearing Loss; Chronic osteoarthritis; Erythematous plaque; Glomus tympanicum paraganglioma; Glomus vagale tumor; PARAGANGLIOMAS 3; Parasympathetic paraganglioma; Atypical pulm…	120	154	[{"UniProt":"O14521","EnsemblGene":["ENSG00000204370"],"SwissProt":["DHSD_HUMAN"]},{"UniProt":"A0A0S2Z4H7","RefSeq":[["NM_001276503","NP_001263432","REVIEWED"]],"SwissProt":["A0A0S2Z4H7_HUMAN"]},{"UniProt":"A0A0S2Z4J3","RefSeq":[["NM_003002","NP_002993","REVIEWED"]],"SwissProt":["A0A0S2Z4J3_HUMAN"]}]	bladder;bone_marrow	Distribution: Detected in all; Specificity: Low tissue specificity	antibody: Most normal tissues displayed weak to moderate cytoplasmic positivity. Alveolar macrophages, stomach, exocrine pancreas, melanocytes, skeletal muscle cells and basal layers of epidermal cells were strongly stained. Glial cells, Purkinje cells, non-germinal center cells, adipocytes and smooth muscle cells were negative.; Cytoplasmic expression in most tissues.	Antibody: Most cancer cells showed weak to moderate cytoplasmic immunoreactivity. Few cases of melanomas were strongly stained. Lymphomas, cervical and renal cancers were generally negative.
1	SMARCA4	6597	BAF190|BAF190A|BRG1|CSS4|MRD16|RTPS2|SNF2|SNF2-beta|SNF2L4|SNF2LB|SWI2|hSNF2b	The protein encoded by this gene is a member of the SWI/SNF family of proteins and is similar to the brahma protein of Drosophila. Members of this family have helicase and ATPase activities and are thought to regulate transcription of certain genes by altering the chromatin structure around those genes. The encoded protein is part of the large ATP-dependent chromatin remodeling complex SNF/SWI, w…	SMARCA4 (SWI/SNF Related, Matrix Associated, Actin Dependent Regulator Of Chromatin, Subfamily A, Member 4) is a Protein Coding gene. Diseases associated with SMARCA4 include Coffin-Siris Syndrome 4 and Rhabdoid Tumor Predisposition Syndrome 2. Among its related pathways are Regulation of Wnt-mediated beta catenin signaling and target gene transcription and Preimplantation Embryo. Gene Ontology (…	Involved in transcriptional activation and repression of select genes by chromatin remodeling (alteration of DNA-nucleosome topology). Component of SWI/SNF chromatin remodeling complexes that carry out key enzymatic activities, changing chromatin structure by altering DNA-histone contacts within a nucleosome in an ATP-dependent manner. Component of the CREST-BRG1 complex, a multiprotein complex t…	28 25	32 37	41 35	24 21	SWI/SNF related, matrix associated, actin dependent regulator of chromatin, subfamily a, member 4	chr19:10960997-11062277	symbol	H. sapiens	protein-coding	The protein encoded by this gene is a member of the SWI/SNF family of proteins and is similar to the brahma protein of Drosophila. Members of this family have helicase and ATPase activities and are thought to regulate transcription of certain genes by altering the chromatin structure around those genes. The encoded protein is part of the large ATP-dependent chromatin remodeling complex SNF/SWI, w…	GO:1902661 positive regulation of glucose mediated signaling pathway;GO:1902659 regulation of glucose mediated signaling pathway;GO:0009757 hexose mediated signaling	[GO:0008150] biological_process; [GO:0034641] cellular nitrogen compound metabolic process; [GO:0009058] biosynthetic process; [GO:0005575] cellular_component; [GO:0005622] intracellular; [GO:0043226] organelle; [GO:0005634] nucleus; [GO:0003674] molecular_function; [GO:0043167] ion binding; [GO:0016887] ATPase activity; [GO:0042393] histone binding; [GO:0051276] chromosome organization; [GO:0032…	GO:0071564 npBAF complex;GO:0071565 nBAF complex;GO:0016514 SWI/SNF complex	GO:0001013 RNA polymerase I regulatory region DNA binding;GO:0001163 RNA polymerase I regulatory region sequence-specific DNA binding;GO:0001164 RNA polymerase I CORE element sequence-specific DNA binding		Disease related genes; Cancer-related genes:Mutational cancer driver genes; Predicted intracellular proteins; Cancer-related genes:Mutated cancer genes	[IPR000330] SNF2-related, N-terminal domain; [IPR001487] Bromodomain; [IPR001650] Helicase, C-terminal; [IPR006576] BRK domain; [IPR014001] Helicase superfamily 1/2, ATP-binding domain; [IPR014012] Helicase/SANT-associated domain; [IPR014978] Glutamine-Leucine-Glutamine, QLQ; [IPR018359] Bromodomain, conserved site; [IPR027417] P-loop containing nucleoside triphosphate hydrolase; [IPR029295] Snf2…	Nucleoplasm (reliability'])					yes			MP:0005370 liver/biliary system phenotype; MP:0005385 cardiovascular system phenotype; MP:0010768 mortality/aging; MP:0005369 muscle phenotype; MP:0005376 homeostasis/metabolism phenotype; MP:0005384 cellular phenotype; MP:0005378 growth/size/body region phenotype; MP:0005381 digestive/alimentary phenotype; MP:0005387 immune system phenotype; MP:0002006 neoplasm; MP:0003631 nervous system phenoty…	[ORPHA:1465] COFFIN-SIRIS SYNDROME; [ORPHA:231108] Familial rhabdoid tumor; [ORPHA:466962] SMARCA4-deficient sarcoma of thorax; [ORPHA:370396] Small cell carcinoma of the ovary	OMIM ID:603254 Swi/snf-related, matrix-associated, actin-dependent regulator of chromatin, subfamily a, member 4	Rhabdoid tumor predisposition syndrome 2; Hereditary cancer-predisposing syndrome; Atrial septal defect; Delayed speech and language development; Ventricular septal defect; Global developmental delay; Autistic behavior; Intellectual disability; Mental retardation, autosomal dominant 16; Neuroblastoma; Inborn genetic diseases	Cholesterol, LDL;Eosinophils;Myocardial Infarction;Waist-Hip Ratio	Cholesterol;Coronary Artery Disease;Coronary Disease;Dermatitis, Atopic;Lipids;Lipoproteins;Metabolism;Stroke	[135900] Coffin Siris; [613325] Rhabdoid tumor predisposition syndrome 2	Clinvar: phenotype not specified: likely pathogenic,not provided,pathogenic,uncertain significance; Hereditary cancer-predisposing syndrome: pathogenic; Inborn genetic diseases: likely pathogenic,not provided,pathogenic,uncertain significance; Mental retardation, autosomal dominant 16: likely pathogenic,not provided,pathogenic,uncertain significance; Rhabdoid tumor predisposition syndrome 2: like…	HP:0100006:Neoplasm of the central nervous system; HP:0009835:Aplasia/Hypoplasia of the distal phalanges of the hand; HP:0009239:Aplasia/Hypoplasia of the distal phalanx of the 5th finger; HP:0100371:Aplasia/Hypoplasia of the distal phalanx of the 5th toe; HP:0008398:Hypoplastic fifth fingernail; HP:0011937:Hypoplastic fifth toenail; HP:0030731:Carcinoma; HP:0009928:Thick nasal alae; HP:0006498:A…		COFFIN-SIRIS SYNDROME 4; Rhabdoid Tumor Predisposition Syndrome 2; Small cell carcinoma, hypercalcemic type; Acute rheumatic heart disease; Small cell carcinoma of ovary; Rhabdoid tumor predisposition syndrome; Thoracic Neoplasms; Endometrial Undifferentiated Carcinoma; Floating-harbor syndrome; Undifferentiated carcinoma of ovary; Aplasia/Hypoplasia of the distal phalanges of the hand; MENTAL RE…	263	517	[{"UniProt":"Q9HBD4","EnsemblGene":["ENSG00000127616"],"EnsemblTrans":[["ENST00000450717","ENSP00000397783",""],["ENST00000646693","ENSP00000495368",""]],"RefSeq":[["NM_001128849","NP_001122321","REVIEWED"],["XM_006722845","XP_006722908","MODEL"],["XM_006722846","XP_006722909","MODEL"],["XM_011528198","XP_011526500","MODEL"]],"UCSC":["uc060tnv.1"],"SwissProt":["Q9HBD4_HUMAN"]},{"UniProt":"P51532"…		Distribution: Detected in all; Specificity: Low tissue specificity	Ubiquitous nuclear expression.; antibody: Strong nuclear immunoreactivity was observed in most normal cells. In addition, mucus of goblet cells of the GI-tract was positive. Hepatocytes were negative.	Antibody: Malignant cells displayed strong nuclear staining. Most hepatocellular carcinomas were weaker stained.
[truncated: 13 more rows]
[truncated: 6 more columns]
