# Supplementary material for: Oncometabolite D-2-hydroxyglutarate - dependent metabolic reprogramming induces skeletal muscle atrophy during cancer cachexia
Source: Research Square preprint supplement (doi:10.21203/rs.3.rs-1246702/v1), 2022-01-27
Supplement: Supplementary file 3 [file a96f3fc3965ce9e723207b6d.xlsx]

## Sheet: Sheet1
Original database	OncogeneName	Gene ID	Synonyms	Description	Gene Summary	Gene Location	Biological Process (GO)	GOSlim (Ontology)	Cellular Component (GO)	Molecular Function (GO)	Kinase Class (UniProt)	Protein Function (Protein Atlas)	InterPro	Subcellular Location (Protein Atlas)	Secreted (UniProt)	Secreted (Protein Altas)	Transmembrane (UniProt)	Membrane (Protein Altas)	Plasma (Protein Altas)	Appris (Ensembl)	Transmembrane (TMHMM)	JAX	Orphanet	OMIM	Pathogenic LoF (ClinVar)	dbGap (NCBI)	GWAS (NHGRI-EBI)	Developmental Disorders (DDG2P)	Variations (Ensembl)	Human Phenotype Ontology (HPO)	Drug (DrugBank)	Disease and gene associations (DisGeNET)	Gene RIF (NCBI)	Pubmed Count	Isoforms ID Map	Tissue Specificity (TiGER)	RNA Tissue Category (Protein Atlas)	Protein Expression Normal (Protein Atlas)	Protein Expression Cancer (Protein Atlas)	Canonical Pathways_x000D_	KEGG Pathway	KEGG Functional Set	KEGG Structural Complex	Hallmark Gene Sets_x000D_	BioCarta Gene Sets_x000D_
Oncogene	TRIB1	10221	C8FW|GIG-2|GIG2|SKIP1|TRB-1|TRB1	tribbles pseudokinase 1		chr8:125430290-125438403	GO:0045643 regulation of eosinophil differentiation;GO:0045645 positive regulation of eosinophil differentiation;GO:0045659 negative regulation of neutrophil differentiation	[GO:0003674] molecular_function; [GO:0043167] ion binding; [GO:0008150] biological_process; [GO:0006464] cellular protein modification process; [GO:0016301] kinase activity; [GO:0034641] cellular nitrogen compound metabolic process; [GO:0009058] biosynthetic process; [GO:0005575] cellular_component; [GO:0005737] cytoplasm; [GO:0005622] intracellular; [GO:0043226] organelle; [GO:0005634] nucleus; …	GO:0005634 nucleus;GO:0043231 intracellular membrane-bounded organelle;GO:0005737 cytoplasm	GO:0031434 mitogen-activated protein kinase kinase binding;GO:0055106 ubiquitin-protein transferase regulator activity;GO:0004860 protein kinase inhibitor activity	CAMK Ser/Thr protein kinase family	Kinases:CAMK Ser/Thr protein kinases; Predicted intracellular proteins; Enzymes	[IPR000719] Protein kinase domain; [IPR011009] Protein kinase-like domain superfamily; [IPR024104] Pseudokinase tribbles family/serine-threonine-protein kinase 40; [IPR024105] Tribbles homologue 1	Cytosol;Plasma membrane (reliability'])								MP:0005370 liver/biliary system phenotype; MP:0010768 mortality/aging; MP:0005376 homeostasis/metabolism phenotype; MP:0005378 growth/size/body region phenotype; MP:0005387 immune system phenotype; MP:0005391 vision/eye phenotype; MP:0005397 hematopoietic system phenotype; MP:0010771 integument phenotype; MP:0005380 embryo phenotype; MP:0005375 adipose tissue phenotype		OMIM ID:609461 Tribbles pseudokinase 1		Body Height;Cardiovascular Physiological Phenomena;Cholesterol, LDL;Pancreatic Neoplasms;Platelet Function Tests;Receptors, Tumor Necrosis Factor	13,16,19-docosatrienoic acid;Adiponectin;Alanine Transaminase;Alkaline Phosphatase;Atrial Fibrillation;Blood Pressure;Body Mass Index;C-Reactive Protein;Cholesterol;Cholesterol, HDL;Coronary Artery Disease;Coronary Disease;Crohn Disease;Diabetes Mellitus;Electrocardiography;Gestational Age;Glucose;Heart Failure;Hematocrit;Hydroxymethylglutaryl CoA Reductases;Hypertriglyceridemia;Inflammatory Bowe…					Epithelial Recurrent Erosion Dystrophy; acute myeloid leukemia with multilineage dysplasia following myelodysplastic syndrome; Osteoarthritis of the hand; Large cell carcinoma of lung; Acute Megakaryocytic Leukemias; Hyperlipoproteinemia Type IIa; Hypercholesterolemia, Familial; Adult Myelodysplastic Syndrome; Childhood Myelodysplastic Syndrome; Hypertriglyceridemia; Myeloid Leukemia; Dyslipidemi…	70	108	[{"UniProt":"Q96RU8","EnsemblGene":["ENSG00000173334"],"SwissProt":["TRIB1_HUMAN"]}]		Distribution: Detected in all; Specificity: Tissue enhanced							(M5890)HALLMARK TNFA SIGNALING VIA NFKB; (M5953)HALLMARK KRAS SIGNALING UP
Oncogene	TXN	7295	TRDX|TRX|TRX1	thioredoxin	The protein encoded by this gene acts as a homodimer and is involved in many redox reactions. The encoded protein is active in the reversible S-nitrosylation of cysteines in certain proteins, which is part of the response to intracellular nitric oxide. This protein is found in the cytoplasm. Two transcript variants encoding different isoforms have been found for this gene. [provided by RefSeq, Oc…	chr9:110256507-110243810	GO:2000170 positive regulation of peptidyl-cysteine S-nitrosylation;GO:0046826 negative regulation of protein export from nucleus;GO:2000169 regulation of peptidyl-cysteine S-nitrosylation	[GO:0003674] molecular_function; [GO:0016491] oxidoreductase activity; [GO:0008150] biological_process; [GO:0042592] homeostatic process; [GO:0044281] small molecule metabolic process; [GO:0005575] cellular_component; [GO:0005622] intracellular; [GO:0043226] organelle; [GO:0005634] nucleus; [GO:0003723] RNA binding; [GO:0005737] cytoplasm; [GO:0005654] nucleoplasm; [GO:0005829] cytosol; [GO:00055…	GO:0070062 extracellular exosome;GO:1903561 extracellular vesicle;GO:0043230 extracellular organelle	GO:0047134 protein-disulfide reductase activity;GO:0004791 thioredoxin-disulfide reductase activity;GO:0016668 oxidoreductase activity, acting on a sulfur group of donors, NAD(P) as acceptor		Predicted intracellular proteins	[IPR005746] Thioredoxin; [IPR013766] Thioredoxin domain; [IPR017937] Thioredoxin, conserved site; [IPR036249] Thioredoxin-like superfamily	Cytosol;Nucleoplasm (reliability'])	yes				yes			MP:0010768 mortality/aging; MP:0005384 cellular phenotype; MP:0005380 embryo phenotype		OMIM ID:187700 Thioredoxin		Myocardial Infarction;alpha-Linolenic Acid	Alzheimer Disease				Phenethyl Isothiocyanate	Acinetobacter Infections; Acute Psychotic Episode; Radiation-induced disorder; Congenital subaortic stenosis; Pneumonia due to influenza; Diabetic embryopathy; Fourth cranial nerve paresis; Pneumonia, Viral; Radiation Syndrome; Aortoiliac occlusive disease; Cheilitis; Water Stress; Lymphoblastic leukemia in children; Subaortic stenosis; premalignant lesion; Erythropoietic Protoporphyria; Human T-…	249	401	[{"UniProt":"P10599","EnsemblGene":["ENSG00000136810"],"SwissProt":["THIO_HUMAN"]},{"UniProt":"H9ZYJ2","RefSeq":[["NM_003329","NP_003320","REVIEWED"]],"SwissProt":["H9ZYJ2_HUMAN"]}]		Distribution: Detected in all; Specificity: Tissue enhanced	antibody: Strong cytoplasmic and nuclear staining was observed in respiratory and gastrointestinal tract as well as female genitalia and most squamous epithelia. Cells of the CNS and liver were mainly negative. Remaining tissues showed in general weak to moderate staining.; General cytoplasmic and nuclear expression.	Antibody: Strong cytoplasmic and nuclear positivity was observed in colorectal, stomach and several cases of liver cancers. A subset of cells in endometrial cancers also displayed strong positivity. A majority of melanomas and testicular cancers were negative.	(M20)PID P38 MKK3 6PATHWAY; (M128)PID TNF PATHWAY; (M50)PID PTP1B PATHWAY	(hsa05418)Fluid shear stress and atherosclerosis; (ko05418)Fluid shear stress and atherosclerosis; (ko04621)NOD-like receptor signaling pathway			(M5938)HALLMARK REACTIVE OXYGEN SPECIES PATHWAY; (M5937)HALLMARK GLYCOLYSIS
Oncogene	CBL	867	C-CBL|CBL2|FRA11B|NSLL|RNF55	Cbl proto-oncogene	This gene is a proto-oncogene that encodes a RING finger E3 ubiquitin ligase. The encoded protein is one of the enzymes required for targeting substrates for degradation by the proteasome. This protein mediates the transfer of ubiquitin from ubiquitin conjugating enzymes (E2) to specific substrates. This protein also contains an N-terminal phosphotyrosine binding domain that allows it to interact…	chr11:119206339-119308149	GO:0032487 regulation of Rap protein signal transduction;GO:2000583 regulation of platelet-derived growth factor receptor-alpha signaling pathway;GO:0035790 platelet-derived growth factor receptor-alpha signaling pathway	[GO:0003674] molecular_function; [GO:0043167] ion binding; [GO:0007165] signal transduction; [GO:0008150] biological_process; [GO:0006464] cellular protein modification process; [GO:0005575] cellular_component; [GO:0005737] cytoplasm; [GO:0005622] intracellular; [GO:0008219] cell death; [GO:0005829] cytosol; [GO:0005886] plasma membrane; [GO:0043226] organelle; [GO:0005794] Golgi apparatus; [GO:0…	GO:0016600 flotillin complex;GO:0042629 mast cell granule;GO:0005901 caveola	GO:0036312 phosphatidylinositol 3-kinase regulatory subunit binding;GO:0046875 ephrin receptor binding;GO:0043548 phosphatidylinositol 3-kinase binding		Predicted intracellular proteins; Disease related genes; Cancer-related genes:Candidate cancer biomarkers; Enzymes; Potential drug targets; ENZYME proteins:Transferases	[IPR001841] Zinc finger, RING-type; [IPR003153] Adaptor protein Cbl, N-terminal helical; [IPR009060] UBA-like superfamily; [IPR011992] EF-hand domain pair; [IPR013083] Zinc finger, RING/FYVE/PHD-type; [IPR014741] Adaptor protein Cbl, EF hand-like; [IPR014742] Adaptor protein Cbl, SH2-like domain; [IPR015940] Ubiquitin-associated domain; [IPR017907] Zinc finger, RING-type, conserved site; [IPR0241…	Cytosol (reliability'])						principal2		MP:0005370 liver/biliary system phenotype; MP:0010768 mortality/aging; MP:0005369 muscle phenotype; MP:0005376 homeostasis/metabolism phenotype; MP:0005384 cellular phenotype; MP:0005378 growth/size/body region phenotype; MP:0005386 behavior/neurological phenotype; MP:0005387 immune system phenotype; MP:0005389 reproductive system phenotype; MP:0005377 hearing/vestibular/ear phenotype; MP:0005371…	[ORPHA:86834] Juvenile myelomonocytic leukemia; [ORPHA:363972] Noonan syndrome-like disorder with juvenile myelomonocytic leukemia; [ORPHA:648] Noonan Syndrome	OMIM ID:165360 Cbl protooncogene	Noonan syndrome-like disorder with or without juvenile myelomonocytic leukemia; Noonan syndrome 1; not specified; Noonan syndrome; Noonan syndrome-like disorder with juvenile myelomonocytic leukemia; Juvenile myelomonocytic leukemia; Hematologic neoplasm; Rasopathy	C-Reactive Protein	Platelet Count	[613563] Noonan syndrome-like disorder with or without juvenile meylomonocytic leukemia	Clinvar: phenotype not specified: likely pathogenic,pathogenic,uncertain significance; Hematologic neoplasm: likely pathogenic,pathogenic; Inborn genetic diseases: pathogenic; Juvenile myelomonocytic leukemia: likely pathogenic,pathogenic,uncertain significance; Malignant germ cell tumor of ovary: likely pathogenic,pathogenic,uncertain significance; Noonan syndrome-like disorder with juvenile mye…	HP:0012209:Juvenile myelomonocytic leukemia; HP:0010310:Chylothorax; HP:0002967:Cubitus valgus; HP:0002002:Deep philtrum; HP:0001650:Aortic valve stenosis; HP:0001004:Lymphedema; HP:0000957:Cafe-au-lait spot; HP:0002213:Fine hair; HP:0001647:Bicuspid aortic valve; HP:0006610:Wide intermamillary distance; HP:0000465:Webbed neck; HP:0012471:Thick vermilion border; HP:0001653:Mitral regurgitation; H…		Fetal hydrops (in some patients); NOONAN SYNDROME-LIKE DISORDER WITH JUVENILE MYELOMONOCYTIC LEUKEMIA; Malignant Ovarian Germ Cell Neoplasm; NOONAN SYNDROME-LIKE DISORDER WITH OR WITHOUT JUVENILE MYELOMONOCYTIC LEUKEMIA; chromosome 11q duplication syndrome; NOONAN-LIKE/MULTIPLE GIANT CELL LESION SYNDROME (disorder); Abdominal Cryptorchidism; Inguinal Cryptorchidism; Myeloproliferative Neoplasm, U…	215	691	[{"UniProt":"P22681","EnsemblGene":["ENSG00000110395"],"EnsemblTrans":[["ENST00000264033","ENSP00000264033","principal2"]],"RefSeq":[["NM_005188","NP_005179","REVIEWED"]],"UCSC":["uc001pwe.5"],"SwissProt":["CBL_HUMAN"]}]		Distribution: Detected in all; Specificity: Tissue enhanced	antibody: Spermatogonia in seminiferus ducts showed strong cytoplasmic positivity. Lung macrophages, thyroid gland, epididymis, heart muscle, subsets of cells in bone marrow and lymphoid tissues were moderately positive. Most remaining normal tissues were negative. ; Cytoplasmic expression in spermatogonia, subsets of immune cells and lymphoid tissues.	Antibody: Malignant cells were in general weakly stained or negative. Several cases of malignant lymphomas showed moderate cytoplasmic staining while several seminomas exhibited strong immunoreactivity.	(M273)PID EPHA2 FWD PATHWAY; (M226)PID VEGFR1 PATHWAY; (M69)PID REELIN PATHWAY	(ko05220)Chronic myeloid leukemia; (ko05100)Bacterial invasion of epithelial cells; (hsa05220)Chronic myeloid leukemia			(M5897)HALLMARK IL6 JAK STAT3 SIGNALING; (M5953)HALLMARK KRAS SIGNALING UP	(M16973)BIOCARTA CBL PATHWAY; (M1389)BIOCARTA SPRY PATHWAY; (M8615)BIOCARTA IL2RB PATHWAY
Oncogene	BRAF	673	B-RAF1|B-raf|BRAF1|NS7|RAFB1	B-Raf proto-oncogene, serine/threonine kinase	This gene encodes a protein belonging to the RAF family of serine/threonine protein kinases. This protein plays a role in regulating the MAP kinase/ERK signaling pathway, which affects cell division, differentiation, and secretion. Mutations in this gene, most commonly the V600E mutation, are the most frequently identified cancer-causing mutations in melanoma, and have been identified in various …	chr7:140924929-140713328	GO:0070413 trehalose metabolism in response to stress;GO:0005991 trehalose metabolic process;GO:0005984 disaccharide metabolic process	[GO:0003674] molecular_function; [GO:0043167] ion binding; [GO:0007165] signal transduction; [GO:0008150] biological_process; [GO:0006464] cellular protein modification process; [GO:0016301] kinase activity; [GO:0005575] cellular_component; [GO:0005622] intracellular; [GO:0043226] organelle; [GO:0005737] cytoplasm; [GO:0005829] cytosol; [GO:0019899] enzyme binding; [GO:0030154] cell differentiati…	GO:0005829 cytosol;GO:0005886 plasma membrane;GO:0071944 cell periphery	GO:0097110 scaffold protein binding;GO:0031267 small GTPase binding;GO:0004674 protein serine/threonine kinase activity	TKL Ser/Thr protein kinase family	Predicted intracellular proteins; FDA approved drug targets:Small molecule drugs; Disease related genes; Cancer-related genes:Mutational cancer driver genes; Enzymes; Kinases:TKL Ser/Thr protein kinases; ENZYME proteins:Transferases; Cancer-related genes:Mutated cancer genes	[IPR000719] Protein kinase domain; [IPR001245] Serine-threonine/tyrosine-protein kinase, catalytic domain; [IPR002219] Protein kinase C-like, phorbol ester/diacylglycerol-binding domain; [IPR003116] Raf-like Ras-binding; [IPR008271] Serine/threonine-protein kinase, active site; [IPR011009] Protein kinase-like domain superfamily; [IPR017441] Protein kinase, ATP binding site; [IPR020454] Diacylglyc…	Vesicles (reliability']); Additional: Cytosol						principal3		MP:0005367 renal/urinary system phenotype; MP:0005370 liver/biliary system phenotype; MP:0005385 cardiovascular system phenotype; MP:0010768 mortality/aging; MP:0005369 muscle phenotype; MP:0005376 homeostasis/metabolism phenotype; MP:0005384 cellular phenotype; MP:0005378 growth/size/body region phenotype; MP:0005386 behavior/neurological phenotype; MP:0005381 digestive/alimentary phenotype; MP:…	[ORPHA:1340] CARDIOFACIOCUTANEOUS SYNDROME; [ORPHA:58017] Classic hairy cell leukemia; [ORPHA:54595] Craniopharyngioma; [ORPHA:146] Differentiated thyroid carcinoma; [ORPHA:389] Langerhans cell histiocytosis; [ORPHA:648] Noonan Syndrome; [ORPHA:500] Noonan syndrome with multiple lentigines; [ORPHA:251615] Pilomyxoid astrocytoma; [ORPHA:357194] Selection of therapeutic option in colorectal cancer;…	OMIM ID:164757 B-raf protooncogene, serine/threonine kinase	Lip and oral cavity carcinoma; Rasopathy; Cardiofaciocutaneous syndrome 1; Cerebral arteriovenous malformation; Noonan syndrome 7; Cardio-facio-cutaneous syndrome; Inborn genetic diseases; Global developmental delay; Malignant melanoma of skin; Ovarian Serous Cystadenocarcinoma; Neoplasm of the large intestine; Lung adenocarcinoma; Papillary renal cell carcinoma, sporadic; Multiple myeloma; Gliob…	Body Height;Frontal Lobe	Cerebrospinal Fluid;Influenza A Virus, H1N1 Subtype;Vitamins;amyloid beta-protein (1-42);tau Proteins	[115150] CARDIOFACIOCUTANEOUS SYNDROME; [613707] LEOPARD SYNDROME TYPE 3; [613706] NOONAN SYNDROME TYPE 7	Adenocarcinoma of prostate: likely pathogenic,pathogenic,uncertain significance; Adenocarcinoma of stomach: likely pathogenic,pathogenic; Adrenocortical carcinoma: likely pathogenic,pathogenic; Astrocytoma, low-grade, somatic: likely pathogenic,pathogenic; Brainstem glioma: likely pathogenic,pathogenic; Cardiofaciocutaneous syndrome 1: likely pathogenic,pathogenic,uncertain significance; Carcinom…	HP:0012059:Lentigo maligna melanoma; HP:0000306:Abnormality of the chin; HP:0002031:Abnormal esophagus morphology; HP:0030939:Palpebral thickening; HP:0006114:Multiple palmar creases; HP:0009908:Anterior creases of earlobe; HP:0008113:Multiple plantar creases; HP:0430000:Abnormality of the frontal bone; HP:0010939:Abnormality of the nasal bone; HP:0012286:Abnormal hypothalamus morphology; HP:0009…	Sorafenib; XL281; RAF-265; PLX-4720; N-{2,4-difluoro-3-[(5-pyridin-3-yl-1H-pyrrolo[2,3-b]pyridin-3-yl)carbonyl]phenyl}ethanesulfonamide; (1E)-5-(1-piperidin-4-yl-3-pyridin-4-yl-1H-pyrazol-4-yl)-2,3-dihydro-1H-inden-1-one oxime; Vemurafenib; Regorafenib; Dabrafenib; Encorafenib; Fostamatinib; Ripretinib	ASTROCYTOMA, LOW-GRADE, SOMATIC; Childhood Brain Stem Glioma; Congenital strabismus; Conjunctival Neoplasms; Desmoplastic spindle and epithelioid cell melanocytic nevus of skin; Diffuse melanocytosis; Drug-induced panniculitis; Eosinophilic cystitis; Eruptive melanocytic nevi; Glomus Tumor of Uncertain Malignant Potential; Glomus tumor, malignant; Granulomatous dermatitis; LEOPARD SYNDROME 3; Lym…	2147	2266	[{"UniProt":"P15056","EnsemblGene":["ENSG00000157764"],"EnsemblTrans":[["ENST00000646891","ENSP00000493543","principal3"]],"RefSeq":[["NM_004333","NP_004324","REVIEWED"]],"UCSC":["uc003vwc.5"],"SwissProt":["BRAF_HUMAN"]}]		Distribution: Detected in all; Specificity: Low tissue specificity	antibody: A majority of normal tissues displayed moderate cytoplasmic immunoreactivity. Microvilli in placental trophoblasts were distinctly stained. ; Ubiquitous cytoplasmic expression.	Antibody: Most malignant tissues showed moderate cytoplasmic staining. Strong immunoreactivity was observed in few cases of prostate-, breast- and thyroid cancer.	(M134)PID TCR RAS PATHWAY; (M270)PID MAPK TRK PATHWAY; (M281)PID FAK PATHWAY	(ko04320)Dorso-ventral axis formation; (hsa04320)Dorso-ventral axis formation; (ko05216)Thyroid cancer	(hsa)MAPK (ERK1/2) signaling; (M00687)MAPK (ERK1/2) signaling		(M5951)HALLMARK SPERMATOGENESIS
Oncogene	RET	5979	CDHF12|CDHR16|HSCR1|MEN2A|MEN2B|MTC1|PTC|RET-ELE1	ret proto-oncogene	This gene encodes a transmembrane receptor and member of the tyrosine protein kinase family of proteins. Binding of ligands such as GDNF (glial cell-line derived neurotrophic factor) and other related proteins to the encoded receptor stimulates receptor dimerization and activation of downstream signaling pathways that play a role in cell differentiation, growth, migration and survival. The encode…	chr10:43077069-43130351	GO:0007497 posterior midgut development;GO:0061146 Peyer's patch morphogenesis;GO:0035799 ureter maturation	[GO:0003674] molecular_function; [GO:0043167] ion binding; [GO:0005575] cellular_component; [GO:0008150] biological_process; [GO:0007155] cell adhesion; [GO:0006464] cellular protein modification process; [GO:0016301] kinase activity; [GO:0005886] plasma membrane; [GO:0005737] cytoplasm; [GO:0005622] intracellular; [GO:0043226] organelle; [GO:0031410] cytoplasmic vesicle; [GO:0005768] endosome; […	GO:0045121 membrane raft;GO:0098857 membrane microdomain;GO:0098589 membrane region	GO:0004714 transmembrane receptor protein tyrosine kinase activity;GO:0019199 transmembrane receptor protein kinase activity;GO:0004713 protein tyrosine kinase activity	Tyr protein kinase family	Predicted intracellular proteins; FDA approved drug targets:Small molecule drugs; Disease related genes; Cancer-related genes:Candidate cancer biomarkers; Enzymes; Kinases:Tyr protein kinases; ENZYME proteins:Transferases	[IPR000719] Protein kinase domain; [IPR001245] Serine-threonine/tyrosine-protein kinase, catalytic domain; [IPR002126] Cadherin-like; [IPR008266] Tyrosine-protein kinase, active site; [IPR011009] Protein kinase-like domain superfamily; [IPR015919] Cadherin-like superfamily; [IPR016249] Tyrosine-protein kinase, Ret receptor; [IPR017441] Protein kinase, ATP binding site; [IPR020635] Tyrosine-protei…	Cytosol;Golgi apparatus (reliability']); Additional: Plasma membrane			yes	yes	yes		yes	MP:0005367 renal/urinary system phenotype; MP:0010768 mortality/aging; MP:0005369 muscle phenotype; MP:0005376 homeostasis/metabolism phenotype; MP:0005384 cellular phenotype; MP:0005378 growth/size/body region phenotype; MP:0005386 behavior/neurological phenotype; MP:0005381 digestive/alimentary phenotype; MP:0002006 neoplasm; MP:0005389 reproductive system phenotype; MP:0003631 nervous system p…	[ORPHA:146] Differentiated thyroid carcinoma; [ORPHA:99361] Familial medullary thyroid carcinoma; [ORPHA:99803] Haddad syndrome; [ORPHA:29072] Hereditary pheochromocytoma-paraganglioma; [ORPHA:388] Hirschsprung disease; [ORPHA:247698] Multiple endocrine neoplasia type 2A; [ORPHA:247709] Multiple endocrine neoplasia type 2B; [ORPHA:1848] Renal agenesis bilateral; [ORPHA:93100] Renal agenesis unila…	OMIM ID:164761 Rearranged during transfection protooncogene	Multiple endocrine neoplasia, type 2; Aganglionic megacolon; Hirschsprung disease 1; Hereditary cancer-predisposing syndrome; Hirschsprung disease; Sensorineural hearing loss; Multiple endocrine neoplasia, type 2a; Inborn genetic diseases; not specified; Multiple endocrine neoplasia, type 1; Medullary thyroid carcinoma; Multiple endocrine neoplasia, type 4; Multiple endocrine neoplasia, type 2b; …	Antihypertensive Agents;Cholesterol, HDL	Hirschsprung Disease;Marijuana Abuse	[162300] Multiple endocrine neoplasia IIB; [191830] RENAL AGENESIS	Central hypoventilation syndrome, congenital, with hirschsprung disease: not provided,pathogenic,uncertain significance; Clinvar: phenotype not specified: likely pathogenic,not provided,pathogenic,risk factor,uncertain significance; Congenital central hypoventilation: likely pathogenic,pathogenic; Familial medullary thyroid carcinoma: likely pathogenic,not provided,pathogenic,uncertain significan…	HP:0004362:Abnormality of enteric ganglion morphology; HP:0011781:Thyroid C cell hyperplasia; HP:0032346:Cutaneous lichen amyloidosis; HP:0011978:Elevated urinary vanillylmandelic acid; HP:0001574:Abnormality of the integument; HP:0002865:Medullary thyroid carcinoma; HP:0004387:Enterocolitis; HP:0006461:Proximal femoral epiphysiolysis; HP:0005994:Nodular goiter; HP:0008208:Parathyroid hyperplasia…	Sorafenib; 1-Ter-Butyl-3-P-Tolyl-1h-Pyrazolo[3,4-D]Pyrimidin-4-Ylamine; Vandetanib; Cabozantinib; Regorafenib; Ponatinib; Lenvatinib; Fostamatinib; Amuvatinib; Selpercatinib	Abnormality of enteric ganglion morphology; Congenital intestinal obstruction; Cutaneous lichen amyloidosis; MULTIPLE ENDOCRINE NEOPLASIA, TYPE IIA, WITH HIRSCHSPRUNG DISEASE; MULTIPLE ENDOCRINE NEOPLASIA, TYPE IIA, WITHOUT PHEOCHROMOCYTOMA; recurrent medullary thyroid cancer; thyroid nodule solitary; Childhood Thyroid Gland Papillary Carcinoma; Congenital unilateral absence; Elevated urinary van…	686	869	[{"UniProt":"P07949","EnsemblGene":["ENSG00000165731"],"SwissProt":["RET_HUMAN"]},{"UniProt":"A0A024R7T2","RefSeq":[["NM_020975","NP_066124","REVIEWED"]],"SwissProt":["A0A024R7T2_HUMAN"]}]		Distribution: Detected in many; Specificity: Tissue enhanced	antibody: Exocrine pancreas, salivary gland, macrophages and parathyroid gland displayed strong cytoplasmic staining. Neuronal cells were moderately stained. Most remaining normal tissues were negative.; Cytoplasmic expression at variable levels in several tissues, mainly in parathyroid gland.	Antibody: Melanomas, prostate cancers, liver cancers and a few cases of gliomas displayed moderate to strong cytoplasmic staining. Remaining tumors were in general weakly stained or negative.	(M82)PID RET PATHWAY; (M142)PID AJDISS 2PATHWAY	(ko05216)Thyroid cancer; (hsa05216)Thyroid cancer; (ko05230)Central carbon metabolism in cancer			(M5941)HALLMARK UV RESPONSE UP; (M5906)HALLMARK ESTROGEN RESPONSE EARLY; (M5907)HALLMARK ESTROGEN RESPONSE LATE
Oncogene	BCL2	596	Bcl-2|PPP1R50	BCL2 apoptosis regulator	This gene encodes an integral outer mitochondrial membrane protein that blocks the apoptotic death of some cells such as lymphocytes. Constitutive expression of BCL2, such as in the case of translocation of BCL2 to Ig heavy chain locus, is thought to be the cause of follicular lymphoma. Alternative splicing results in multiple transcript variants. [provided by RefSeq, Feb 2016]	chr18:63320280-63123346	GO:0032848 negative regulation of cellular pH reduction;GO:0046671 negative regulation of retinal cell programmed cell death;GO:0043375 CD8-positive, alpha-beta T cell lineage commitment	[GO:0005575] cellular_component; [GO:0008150] biological_process; [GO:0008219] cell death; [GO:0005622] intracellular; [GO:0043226] organelle; [GO:0005634] nucleus; [GO:0005737] cytoplasm; [GO:0005783] endoplasmic reticulum; [GO:0005654] nucleoplasm; [GO:0005739] mitochondrion; [GO:0005635] nuclear envelope; [GO:0006950] response to stress; [GO:0003674] molecular_function; [GO:0002376] immune sys…	GO:0046930 pore complex;GO:0043209 myelin sheath;GO:0005741 mitochondrial outer membrane	GO:0051434 BH3 domain binding;GO:0051400 BH domain binding;GO:0070513 death domain binding		FDA approved drug targets:Small molecule drugs; Cancer-related genes:Candidate cancer biomarkers; Disease related genes; Predicted intracellular proteins	[IPR002475] Bcl2-like; [IPR003093] Apoptosis regulator, Bcl-2 protein, BH4; [IPR004725] Apoptosis regulator, Bcl-2/ BclX; [IPR013278] Apoptosis regulator, Bcl-2; [IPR020717] Apoptosis regulator, Bcl-2, BH1 motif, conserved site; [IPR020726] Apoptosis regulator, Bcl-2, BH2 motif, conserved site; [IPR020728] Apoptosis regulator, Bcl-2, BH3 motif, conserved site; [IPR020731] Apoptosis regulator, Bcl…	Nuclear membrane (reliability']); Additional: Nucleoplasm			yes	yes	yes		yes	MP:0005367 renal/urinary system phenotype; MP:0005385 cardiovascular system phenotype; MP:0010768 mortality/aging; MP:0005369 muscle phenotype; MP:0005376 homeostasis/metabolism phenotype; MP:0005384 cellular phenotype; MP:0005378 growth/size/body region phenotype; MP:0005381 digestive/alimentary phenotype; MP:0005387 immune system phenotype; MP:0002006 neoplasm; MP:0005389 reproductive system ph…	[ORPHA:545] Follicular lymphoma; [ORPHA:480541] High grade B-cell lymphoma with MYC and/ or BCL2 and/or BCL6 rearrangement; [ORPHA:98839] Intravascular large B-cell lymphoma	OMIM ID:151430 B-cell cll/lymphoma 2		Blood Glucose;Blood Pressure;Child Development Disorders, Pervasive;Echocardiography;Emotions;Eosinophils;Fibrinogen;Platelet Function Tests;Stroke;Tunica Media;monocyte chemoattractant protein 1 (66-77)	3-hydroxy-1-methylpropylmercapturic acid;Body Mass Index;Insulin Resistance;Leukemia, Lymphocytic, Chronic, B-Cell;Lymphoma, Follicular;Scoliosis;Smoking;Troponin T;Waist-Hip Ratio			HP:0200036:Skin nodule; HP:0002585:Abnormality of the peritoneum; HP:0030166:Night sweats; HP:0100721:Mediastinal lymphadenopathy; HP:0002202:Pleural effusion; HP:0001004:Lymphedema; HP:0001287:Meningitis; HP:0002665:Lymphoma; HP:0001824:Weight loss; HP:0001945:Fever; HP:0012378:Fatigue; HP:0001744:Splenomegaly	Ibuprofen; Paclitaxel; Docetaxel; Rasagiline; Paclitaxel docosahexaenoic acid; Apoptone; Glycine betaine; Eribulin; Dexibuprofen; Isosorbide; Venetoclax; Obatoclax; Navitoclax	Metastatic Bladder Urothelial Carcinoma; Non-follicular lymphoma; Prostatic Obstruction; Urinary outflow obstruction; Angiomyofibroblastoma; Atypical Burkitt's lymphoma; Essential mixed cryoglobulinemia; Follicular non-Hodgkin's lymphoma, large cell; Irritated basal cell papilloma; Leukoplakia of oral mucosa, incl tongue; Oligomeganephronic hypoplasia of kidney; Recurrent Follicular Lymphoma; Rec…	1675	1989	[{"UniProt":"P10415","EnsemblGene":["ENSG00000171791"],"SwissProt":["BCL2_HUMAN"]},{"UniProt":"A0A024R2B3","RefSeq":[["NM_000633","NP_000624","REVIEWED"]],"SwissProt":["A0A024R2B3_HUMAN"]},{"UniProt":"A0A024R2C4","RefSeq":[["NM_000657","NP_000648","REVIEWED"]],"SwissProt":["A0A024R2C4_HUMAN"]}]		Distribution: Detected in all; Specificity: Low tissue specificity	Cytoplasmic expression in several different tissue types, including thyroid gland and lymphoid organs.; antibody: Moderate to strong cytoplasmic staining was observed in several tissues, including, lymphoid tissues, intestines and female genitalia. Upper gastrointestinal tract, CNS, liver and testis were mainly negative.	Antibody: Moderate to strong cytoplasmic staining in several lymphomas, melanomas, lung, breast, endometrial, skin, renal and pancreatic cancers. Most other cancers tissues were negative. Subsets of immune cells showed strong cytoplasmic staining.	(M5060)SA FAS SIGNALING; (M13096)SA PROGRAMMED CELL DEATH; (M162)PID RXR VDR PATHWAY	(hsa04215)Apoptosis - multiple species; (ko04215)Apoptosis - multiple species; (ko04340)Hedgehog signaling pathway			(M5947)HALLMARK IL2 STAT5 SIGNALING; (M5891)HALLMARK HYPOXIA; (M5906)HALLMARK ESTROGEN RESPONSE EARLY	(M22035)BIOCARTA MELANOCYTE PATHWAY; (M22020)BIOCARTA PRION PATHWAY; (M2587)BIOCARTA HSP27 PATHWAY
Oncogene	PIK3CA	5290	CLAPO|CLOVE|CWS5|MCAP|MCM|MCMTC|PI3K|PI3K-alpha|p110-alpha	phosphatidylinositol-4,5-bisphosphate 3-kinase catalytic subunit alpha	Phosphatidylinositol 3-kinase is composed of an 85 kDa regulatory subunit and a 110 kDa catalytic subunit. The protein encoded by this gene represents the catalytic subunit, which uses ATP to phosphorylate PtdIns, PtdIns4P and PtdIns(4,5)P2. This gene has been found to be oncogenic and has been implicated in cervical cancers. A pseudogene of this gene has been defined on chromosome 22. [provided …	chr3:179148114-179240093	GO:0044028 DNA hypomethylation;GO:0044029 hypomethylation of CpG island;GO:0038028 insulin receptor signaling pathway via phosphatidylinositol 3-kinase	[GO:0003674] molecular_function; [GO:0008150] biological_process; [GO:0016301] kinase activity; [GO:0009058] biosynthetic process; [GO:0006629] lipid metabolic process; [GO:0007165] signal transduction; [GO:0043167] ion binding; [GO:0006464] cellular protein modification process; [GO:0005575] cellular_component; [GO:0005737] cytoplasm; [GO:0005622] intracellular; [GO:0048856] anatomical structure…	GO:0005943 phosphatidylinositol 3-kinase complex, class IA;GO:0005944 phosphatidylinositol 3-kinase complex, class IB;GO:0097651 phosphatidylinositol 3-kinase complex, class I	GO:0052812 phosphatidylinositol-3,4-bisphosphate 5-kinase activity;GO:0046934 phosphatidylinositol-4,5-bisphosphate 3-kinase activity;GO:0052813 phosphatidylinositol bisphosphate kinase activity	Atypical: PI3/PI4-kinase family	Kinases:Atypical kinases; Predicted intracellular proteins; FDA approved drug targets:Small molecule drugs; Disease related genes; Cancer-related genes:Candidate cancer biomarkers; Cancer-related genes:Mutational cancer driver genes; Enzymes; ENZYME proteins:Transferases; RAS pathway related proteins; Cancer-related genes:Mutated cancer genes	[IPR000341] Phosphatidylinositol 3-kinase Ras-binding (PI3K RBD) domain; [IPR000403] Phosphatidylinositol 3-/4-kinase, catalytic domain; [IPR001263] Phosphoinositide 3-kinase, accessory (PIK) domain; [IPR002420] Phosphatidylinositol 3-kinase, C2 domain; [IPR003113] Phosphatidylinositol 3-kinase adaptor-binding (PI3K ABD) domain; [IPR008290] Phosphatidylinositol 3-kinase, Vps34 type; [IPR011009] P…	Cytosol (reliability'])						principal1		MP:0005367 renal/urinary system phenotype; MP:0005370 liver/biliary system phenotype; MP:0005385 cardiovascular system phenotype; MP:0010768 mortality/aging; MP:0005369 muscle phenotype; MP:0005376 homeostasis/metabolism phenotype; MP:0005384 cellular phenotype; MP:0005378 growth/size/body region phenotype; MP:0005386 behavior/neurological phenotype; MP:0005387 immune system phenotype; MP:0002006…	[ORPHA:210159] Adult hepatocellular carcinoma; [ORPHA:140944] CLOVES syndrome; [ORPHA:201] COWDEN SYNDROME; [ORPHA:276280] Hemihyperplasia-multiple lipomatosis syndrome; [ORPHA:99802] Hemimegalencephaly; [ORPHA:144] Lynch syndrome; [ORPHA:295239] Macrodactyly of fingers unilateral; [ORPHA:295243] Macrodactyly of toes unilateral; [ORPHA:60040] Megalencephaly-capillary malformation-polymicrogyria s…	OMIM ID:171834 Phosphatidylinositol 3-kinase, catalytic, alpha	Squamous cell lung carcinoma; Megalencephaly-capillary malformation-polymicrogyria syndrome; Cowden syndrome 1; PIK3CA related overgrowth spectrum; Familial cancer of breast; Capillary malformation of the lower lip, lymphatic malformation of face and neck, asymmetry of face and limbs, and partial/generalized overgrowth; Endometrial carcinoma; Ovarian Neoplasms; Cowden syndrome; Squamous cell carc…			[612918] CLOVES: CONGENITAL LIPOMATOUS OVERGROWTH VASCULAR MALFORMATIONS AND EPIDERMAL NEVI; [No disease mim] Hemimegalencephaly PIK3CA; [602501] Megalencephaly-Capillary malformation-Polymicrogyria syndrome somatic 3	Adenocarcinoma of prostate: drug response,likely pathogenic,not provided,pathogenic; Adenocarcinoma of stomach: drug response,likely pathogenic,not provided,pathogenic; Adenoid cystic carcinoma: likely pathogenic,pathogenic; Adrenocortical carcinoma: likely pathogenic,pathogenic; Brainstem glioma: drug response,likely pathogenic,not provided,pathogenic; Breast adenocarcinoma: drug response,likely…	HP:0002624:Abnormal venous morphology; HP:0012887:Ovarian serous cystadenoma; HP:0040009:Hyperparakeratosis; HP:0010714:2-4 toe syndactyly; HP:0025104:Capillary malformation; HP:0012871:Varicocele; HP:0004481:Progressive macrocephaly; HP:0100555:Asymmetric growth; HP:0006774:Ovarian papillary adenocarcinoma; HP:0004099:Macrodactyly; HP:0012721:Venous malformation; HP:0001054:Numerous nevi; HP:000…	ATP; Caffeine; XL765; Wortmannin; Pilaralisib; Alpelisib; Copanlisib	Accessory skeletal muscle; CLAPO Syndrome; COWDEN SYNDROME 5; Congenital Lipomatous Overgrowth, Vascular Malformations, and Epidermal Nevi; Congenital malformation syndromes involving early overgrowth; Lichenoid actinic keratosis; Lipomatosis of Nerve; MACRODACTYLY, SOMATIC; MEGALENCEPHALY-CAPILLARY MALFORMATION-POLYMICROGYRIA SYNDROME, SOMATIC; Macrodactylia of fingers; Macrodactyly of toe; Medi…	1274	1457	[{"UniProt":"P42336","EnsemblGene":["ENSG00000121879"],"EnsemblTrans":[["ENST00000263967","ENSP00000263967","principal1"]],"RefSeq":[["NM_006218","NP_006209","REVIEWED"],["XM_006713658","XP_006713721","MODEL"],["XM_011512894","XP_011511196","MODEL"]],"UCSC":["uc003fjk.4"],"SwissProt":["PK3CA_HUMAN"]},{"UniProt":"Q4LE51","RefSeq":[["NM_006218","NP_006209","REVIEWED"],["XM_006713658","XP_006713721"…	lymph_node	Distribution: Detected in all; Specificity: Low tissue specificity	General cytoplasmic expression.; antibody: Most normal tissues showed moderate to strong cytoplasmic positivity with a granular pattern. Stromal cells, cells in CNS, epididymis, cells in glomeruli and muscle cells were weakly stained or negative.	Antibody: Cancer cells showed moderate to strong cytoplasmic immunoreactivity with a granular pattern. Most gliomas and several cases of renal, testicular and breast cancers were weakly stained or negative.	(M135)PID IL5 PATHWAY; (M12771)SA PTEN PATHWAY; (M18895)SA TRKA RECEPTOR	(ko04960)Aldosterone-regulated sodium reabsorption; (hsa04960)Aldosterone-regulated sodium reabsorption; (ko04973)Carbohydrate digestion and absorption	(hsa)PI3K-Akt signaling; (M00676)PI3K-Akt signaling		(M5921)HALLMARK COMPLEMENT	(M5291)BIOCARTA CDC42RAC PATHWAY; (M22029)BIOCARTA PLC PATHWAY; (M16811)BIOCARTA ERK5 PATHWAY
Oncogene	PDGFRA	5156	CD140A|PDGFR-2|PDGFR2	platelet derived growth factor receptor alpha	This gene encodes a cell surface tyrosine kinase receptor for members of the platelet-derived growth factor family. These growth factors are mitogens for cells of mesenchymal origin. The identity of the growth factor bound to a receptor monomer determines whether the functional receptor is a homodimer or a heterodimer, composed of both platelet-derived growth factor receptor alpha and beta polype…	chr4:54229127-54298245	GO:0038086 VEGF-activated platelet-derived growth factor receptor signaling pathway;GO:0038091 positive regulation of cell proliferation by VEGF-activated platelet derived growth factor receptor signaling pathway;GO:0072275 metanephric glomerulus morphogenesis	[GO:0003674] molecular_function; [GO:0043167] ion binding; [GO:0008150] biological_process; [GO:0006464] cellular protein modification process; [GO:0016301] kinase activity; [GO:0007165] signal transduction; [GO:0008283] cell population proliferation; [GO:0040011] locomotion; [GO:0048870] cell motility; [GO:0005575] cellular_component; [GO:0005622] intracellular; [GO:0043226] organelle; [GO:00056…	GO:0005902 microvillus;GO:0098858 actin-based cell projection;GO:0009897 external side of plasma membrane	GO:0005018 platelet-derived growth factor alpha-receptor activity;GO:0005017 platelet-derived growth factor-activated receptor activity;GO:0038085 vascular endothelial growth factor binding	Tyr protein kinase family	CD markers; Predicted intracellular proteins; FDA approved drug targets:Small molecule drugs; Disease related genes; FDA approved drug targets:Biotech drugs; Cancer-related genes:Candidate cancer biomarkers; Cancer-related genes:Mutational cancer driver genes; Enzymes; Kinases:Tyr protein kinases; ENZYME proteins:Transferases; RAS pathway related proteins	[IPR000719] Protein kinase domain; [IPR001245] Serine-threonine/tyrosine-protein kinase, catalytic domain; [IPR001824] Tyrosine-protein kinase, receptor class III, conserved site; [IPR003598] Immunoglobulin subtype 2; [IPR003599] Immunoglobulin subtype; [IPR007110] Immunoglobulin-like domain; [IPR008266] Tyrosine-protein kinase, active site; [IPR011009] Protein kinase-like domain superfamily; [IP…	Cell Junctions;Nucleoplasm;Plasma membrane (reliability'])			yes	yes	yes		yes	MP:0005367 renal/urinary system phenotype; MP:0005385 cardiovascular system phenotype; MP:0010768 mortality/aging; MP:0005369 muscle phenotype; MP:0005376 homeostasis/metabolism phenotype; MP:0005384 cellular phenotype; MP:0005378 growth/size/body region phenotype; MP:0005386 behavior/neurological phenotype; MP:0005381 digestive/alimentary phenotype; MP:0005387 immune system phenotype; MP:0002006…	[ORPHA:168940] Chronic eosinophilic leukemia; [ORPHA:44890] Gastrointestinal stromal tumor; [ORPHA:168947] Myeloid/lymphoid neoplasm associated with PDGFRA rearrangement; [ORPHA:99860] Precursor B-cell acute lymphoblastic leukemia; [ORPHA:314950] Primary hypereosinophilic syndrome	OMIM ID:173490 Platelet-derived growth factor receptor, alpha	Gastrointestinal stromal tumor; Cutaneous melanoma; Polyps, multiple and recurrent inflammatory fibroid, gastrointestinal; Hypereosinophilic syndrome, idiopathic, resistant to imatinib	Arteries;Atherosclerosis;Basophils;Platelet Function Tests	Astigmatism;Bipolar Disorder;Body Height;Breast Feeding;Corneal Topography;Drug Resistance;Erythrocyte Count;Erythrocyte Indices;Hematocrit;Hemoglobins		Cutaneous melanoma: likely pathogenic; Gastrointestinal stromal tumor, familial: likely pathogenic,not provided,pathogenic; Gastrointestinal stroma tumor: likely pathogenic,not provided,pathogenic; Hypereosinophilic syndrome, idiopathic, resistant to imatinib: pathogenic	HP:0006685:Endocardial fibrosis; HP:0002576:Intussusception; HP:0100751:Esophageal neoplasm; HP:0100833:Neoplasm of the small intestine; HP:0005547:Myeloproliferative disorder; HP:0100273:Neoplasm of the colon; HP:0100242:Sarcoma; HP:0001723:Restrictive cardiomyopathy; HP:0100723:Gastrointestinal stroma tumor; HP:0100743:Neoplasm of the rectum; HP:0000707:Abnormality of the nervous system; HP:000…	Becaplermin; Imatinib; Sunitinib; XL820; Olaratumab; Pazopanib; Midostaurin; Regorafenib; Ponatinib; Lenvatinib; Nintedanib; Foreskin keratinocyte (neonatal); Fostamatinib; Erdafitinib; Amuvatinib; Ripretinib	Cerebral hygroma; Eosinophilic granulomatous polyp; HYPEREOSINOPHILIC SYNDROME, IDIOPATHIC, RESISTANT TO IMATINIB; Myeloid and/or lymphoid neoplasm associated with platelet derived growth factor receptor alpha rearrangement; Polyps, Multiple And Recurrent Inflammatory Fibroid, Gastrointestinal; Disorder of skull; Endometrial Small Cell Carcinoma; Histiocytosis, generalized eruptive; Laryngeal Sma…	407	502	[{"UniProt":"P16234","EnsemblGene":["ENSG00000134853"],"SwissProt":["PGFRA_HUMAN"]}]		Distribution: Detected in many; Specificity: Tissue enhanced	Cytoplasmic expression in myoepithelial cells and extracellular positivity in several tissues.		(M206)PID PDGFRA PATHWAY; (M166)PID ATF2 PATHWAY	(ko05230)Central carbon metabolism in cancer; (ko05214)Glioma; (ko05218)Melanoma				(M5291)BIOCARTA CDC42RAC PATHWAY; (M16973)BIOCARTA CBL PATHWAY; (M8601)BIOCARTA RAC1 PATHWAY
Oncogene	NRAS	4893	ALPS4|CMNS|N-ras|NCMS|NRAS1|NS6	NRAS proto-oncogene, GTPase	This is an N-ras oncogene encoding a membrane protein that shuttles between the Golgi apparatus and the plasma membrane. This shuttling is regulated through palmitoylation and depalmitoylation by the ZDHHC9-GOLGA7 complex. The encoded protein, which has intrinsic GTPase activity, is activated by a guanine nucleotide-exchange factor and inactivated by a GTPase activating protein. Mutations in this…	chr1:114716771-114704469	GO:0001938 positive regulation of endothelial cell proliferation;GO:0002223 stimulatory C-type lectin receptor signaling pathway;GO:0002220 innate immune response activating cell surface receptor signaling pathway	[GO:0007165] signal transduction; [GO:0008150] biological_process; [GO:0005575] cellular_component; [GO:0003674] molecular_function; [GO:0043167] ion binding; [GO:0003924] GTPase activity; [GO:0005886] plasma membrane; [GO:0005737] cytoplasm; [GO:0005622] intracellular; [GO:0043226] organelle; [GO:0005794] Golgi apparatus; [GO:0005576] extracellular region; [GO:0005615] extracellular space; [GO:0…	GO:0070821 tertiary granule membrane;GO:0070820 tertiary granule;GO:0030667 secretory granule membrane	GO:0019003 GDP binding;GO:0003924 GTPase activity;GO:0005525 GTP binding		Predicted intracellular proteins; Disease related genes; Cancer-related genes:Mutational cancer driver genes; RAS pathway related proteins; Cancer-related genes:Mutated cancer genes	[IPR001806] Small GTPase; [IPR005225] Small GTP-binding protein domain; [IPR020849] Small GTPase superfamily, Ras-type; [IPR027417] P-loop containing nucleoside triphosphate hydrolase							principal1		MP:0005370 liver/biliary system phenotype; MP:0010768 mortality/aging; MP:0005376 homeostasis/metabolism phenotype; MP:0005384 cellular phenotype; MP:0005378 growth/size/body region phenotype; MP:0005386 behavior/neurological phenotype; MP:0005387 immune system phenotype; MP:0002006 neoplasm; MP:0005390 skeleton phenotype; MP:0005397 hematopoietic system phenotype; MP:0005379 endocrine/exocrine g…	[ORPHA:146] Differentiated thyroid carcinoma; [ORPHA:86834] Juvenile myelomonocytic leukemia; [ORPHA:626] Large congenital melanocytic nevus; [ORPHA:2612] Linear nevus sebaceus syndrome; [ORPHA:648] Noonan Syndrome; [ORPHA:268114] RAS-associated autoimmune leukoproliferative disease; [ORPHA:357194] Selection of therapeutic option in colorectal cancer; [ORPHA:544260] Selection of therapeutic optio…	OMIM ID:164790 Nras protooncogene, gtpase	Anemia; Neoplasm of stomach; Cutaneous melanoma; Acute myeloid leukemia; Transitional cell carcinoma of the bladder; Malignant melanoma of skin; Non-Hodgkin lymphoma; Myelodysplastic syndrome; Multiple myeloma; Adenocarcinoma of stomach; Neoplasm; Medulloblastoma; Neoplasm of the large intestine; Chronic lymphocytic leukemia; Hepatocellular carcinoma; Malignant neoplasm of body of uterus; Nasopha…		Autistic Disorder	[613224] Noonan syndrome type 6	Acute myeloid leukemia: drug response,likely pathogenic,not provided,pathogenic,uncertain significance; Adenocarcinoma of stomach: drug response,likely pathogenic,not provided,pathogenic,uncertain significance; Adrenocortical carcinoma: drug response,likely pathogenic,not provided,pathogenic,uncertain significance; Carcinoma of colon: likely pathogenic,pathogenic; Chronic lymphocytic leukemia: dr…	HP:0005603:Numerous congenital melanocytic nevi; HP:0025510:Nevus spilus; HP:0200022:Choroid plexus papilloma; HP:0010817:Linear nevus sebaceous; HP:0010815:Nevus sebaceous; HP:0005600:Congenital giant melanocytic nevus; HP:0004523:Long eyebrows; HP:0010759:Prominence of the premaxilla; HP:0002731:Decreased lymphocyte apoptosis; HP:0001780:Abnormality of toe; HP:0012209:Juvenile myelomonocytic le…		Leukemia, Experimental; Malignant melanoma of rectum; Melanomatosis; NEUROCUTANEOUS MELANOSIS, SOMATIC; Neurocutaneous melanosis; Numerous congenital melanocytic nevi; Spondylocostal Dysostosis with Anal Atresia and Urogenital Anomalies; childhood acute myeloid leukemia/other myeloid malignancies; Central nervous system melanoma; Dermatitis acneiform; Genitourinary dysplasia; Long eyebrows; Nevus…	444	545	[{"UniProt":"P01111","EnsemblGene":["ENSG00000213281"],"EnsemblTrans":[["ENST00000369535","ENSP00000358548","principal1"]],"RefSeq":[["NM_002524","NP_002515","REVIEWED"]],"SwissProt":["RASN_HUMAN"]},{"UniProt":"Q5U091","RefSeq":[["NM_002524","NP_002515","REVIEWED"]],"UCSC":["uc009wgu.4"],"SwissProt":["Q5U091_HUMAN"]}]		Distribution: Detected in all; Specificity: Low tissue specificity	antibody: Most normal tissues displayed moderate cytoplasmic positivity. Strong staining was observed in exocrine pancreas, purkinje cells and placental trophoblastic cells.; Cytoplasmic and membranous expression in several tissues.	Antibody: Cancer cells showed moderate cytoplasmic immunoreactivity. The majority of colorectal cancers and several lymphomas, pancreatic and endometrial cancers were strongly stained.	(M134)PID TCR RAS PATHWAY; (M269)PID RAS PATHWAY; (M270)PID MAPK TRK PATHWAY	(ko05216)Thyroid cancer; (hsa05216)Thyroid cancer; (ko05219)Bladder cancer
Oncogene	MET	4233	AUTS9|DFNB97|HGFR|RCCP2|c-Met	MET proto-oncogene, receptor tyrosine kinase	This gene encodes a member of the receptor tyrosine kinase family of proteins and the product of the proto-oncogene MET. The encoded preproprotein is proteolytically processed to generate alpha and beta subunits that are linked via disulfide bonds to form the mature receptor. Further processing of the beta subunit results in the formation of the M10 peptide, which has been shown to reduce lung fi…	chr7:116672196-116798386	GO:0070494 regulation of thrombin-activated receptor signaling pathway;GO:0070495 negative regulation of thrombin-activated receptor signaling pathway;GO:1905098 negative regulation of guanyl-nucleotide exchange factor activity	[GO:0003674] molecular_function; [GO:0007165] signal transduction; [GO:0008150] biological_process; [GO:0005575] cellular_component; [GO:0043167] ion binding; [GO:0006464] cellular protein modification process; [GO:0016301] kinase activity; [GO:0034641] cellular nitrogen compound metabolic process; [GO:0009058] biosynthetic process; [GO:0006950] response to stress; [GO:0008219] cell death; [GO:00…	GO:0009925 basal plasma membrane;GO:0045178 basal part of cell;GO:0016323 basolateral plasma membrane	GO:0005008 hepatocyte growth factor-activated receptor activity;GO:0017154 semaphorin receptor activity;GO:0004714 transmembrane receptor protein tyrosine kinase activity	Tyr protein kinase family	Predicted intracellular proteins; FDA approved drug targets:Small molecule drugs; Disease related genes; Cancer-related genes:Candidate cancer biomarkers; Predicted secreted proteins; Enzymes; Kinases:Tyr protein kinases; ENZYME proteins:Transferases; RAS pathway related proteins; Cancer-related genes:Mutated cancer genes	[IPR001627] Sema domain; [IPR015943] WD40/YVTN repeat-like-containing domain superfamily; [IPR031148] Plexin family; [IPR036352] Sema domain superfamily; [IPR000719] Protein kinase domain; [IPR001245] Serine-threonine/tyrosine-protein kinase, catalytic domain; [IPR002165] Plexin repeat; [IPR002909] IPT domain; [IPR008266] Tyrosine-protein kinase, active site; [IPR011009] Protein kinase-like domai…	Cytosol;Plasma membrane (reliability'])	yes	yes	yes	yes	yes		yes	MP:0005367 renal/urinary system phenotype; MP:0005370 liver/biliary system phenotype; MP:0005385 cardiovascular system phenotype; MP:0010768 mortality/aging; MP:0005369 muscle phenotype; MP:0005376 homeostasis/metabolism phenotype; MP:0005384 cellular phenotype; MP:0005378 growth/size/body region phenotype; MP:0005386 behavior/neurological phenotype; MP:0005381 digestive/alimentary phenotype; MP:…	[ORPHA:90636] Autosomal recessive non-syndromic sensorineural deafness type DFNB; [ORPHA:47044] Hereditary papillary renal cell carcinoma; [ORPHA:488265] Osteofibrous dysplasia; [ORPHA:319298] Papillary renal cell carcinoma; [ORPHA:33402] Pediatric hepatocellular carcinoma; [ORPHA:357191] Selection of therapeutic option in non-small cell lung carcinoma; [ORPHA:106] NON RARE IN EUROPE: Autism	OMIM ID:164860 Met protooncogene	Carcinoma; Neoplasm; Kidney Carcinoma; Hereditary cancer-predisposing syndrome; Renal cell carcinoma, papillary, 1; Deafness, autosomal recessive 97; Nonsyndromic Hearing Loss and Deafness, Autosomal Recessive; Childhood hepatocellular carcinoma	Hip;Platelet Function Tests	Electrocardiography;Heart Rate;Hematocrit;Multiple Sclerosis;Triglycerides;Trypanosoma cruzi			HP:0005864:Pseudoarthrosis; HP:0002605:Hepatic necrosis; HP:0410019:Epigastric pain; HP:0006766:Papillary renal cell carcinoma; HP:0030242:Portal vein thrombosis; HP:0006572:Subacute progressive viral hepatitis; HP:0006254:Elevated alpha-fetoprotein; HP:0001413:Micronodular cirrhosis; HP:0003038:Fibular hypoplasia; HP:0001402:Hepatocellular carcinoma; HP:0001395:Hepatic fibrosis; HP:0003829:Incom…	K-252a; SGX-523; 1-(4-fluorophenyl)-N-[3-fluoro-4-(1H-pyrrolo[2,3-b]pyridin-4-yloxy)phenyl]-2-oxo-1,2-dihydropyridine-3-carboxamide; N-({4-[(2-aminopyridin-4-yl)oxy]-3-fluorophenyl}carbamoyl)-2-(4-fluorophenyl)acetamide; 2-(4-fluorophenyl)-N-{[3-fluoro-4-(1H-pyrrolo[2,3-b]pyridin-4-yloxy)phenyl]carbamoyl}acetamide; N-(3-chlorophenyl)-N-methyl-2-oxo-3-[(3,4,5-trimethyl-1H-pyrrol-2-yl)methyl]-2H-in…	Advanced Cervical Carcinoma; Chest--Tumors; DEAFNESS, AUTOSOMAL RECESSIVE 97; Malignant syndrome NOS; Papillary renal cell carcinoma, familial; Stage IB Non-Small Cell Lung Carcinoma AJCC v7; Tibia, Bowing of, with Pseudarthrosis and Pectus Excavatum; stage IB non-small cell lung cancer; OSTEOFIBROUS DYSPLASIA, SUSCEPTIBILITY TO; Hepatic Necrosis, CTCAE 3.0; Hepatic Necrosis, CTCAE 5.0; Type 1 Pa…	1111	1236	[{"UniProt":"P08581","EnsemblGene":["ENSG00000105976"],"SwissProt":["MET_HUMAN"]},{"UniProt":"A0A024R728","RefSeq":[["NM_001127500","NP_001120972","REVIEWED"]],"SwissProt":["A0A024R728_HUMAN"]},{"UniProt":"A0A024R759","RefSeq":[["NM_000245","NP_000236","REVIEWED"]],"SwissProt":["A0A024R759_HUMAN"]},{"UniProt":"B4DLF5","RefSeq":[["NM_001324402","NP_001311331","REVIEWED"],["XM_006715990","XP_006716…		Distribution: Detected in many; Specificity: Low tissue specificity	antibody: Most normal tissues displayed moderate cytoplasmic immunoreactivity, often accompanied with membranous staining. Keratinized layers of squamous epithelia were strongly stained. Strong staining was also found in neuronal cells.; Cytoplasmic and membranous expression of varying levels in most tissues.	Antibody: Most cancer tissues displayed moderate to strong cytoplasmic immunoreactivity. Strongest staining was observed in colorectal cancers.	(M86)PID ARF6 PATHWAY; (M232)PID ECADHERIN STABILIZATION PATHWAY; (M91)PID TCPTP PATHWAY	(hsa05144)Malaria; (ko05144)Malaria; (ko05230)Central carbon metabolism in cancer			(M5942)HALLMARK UV RESPONSE DN; (M5932)HALLMARK INFLAMMATORY RESPONSE; (M5937)HALLMARK GLYCOLYSIS	(M16973)BIOCARTA CBL PATHWAY; (M19358)BIOCARTA MET PATHWAY
Oncogene	KRAS	3845	C-K-RAS|CFC2|K-RAS2A|K-RAS2B|K-RAS4A|K-RAS4B|K-Ras|KI-RAS|KRAS1|KRAS2|NS|NS3|OES|RALD|RASK2|c-Ki-ras|c-Ki-ras2	KRAS proto-oncogene, GTPase	This gene, a Kirsten ras oncogene homolog from the mammalian ras gene family, encodes a protein that is a member of the small GTPase superfamily. A single amino acid substitution is responsible for an activating mutation. The transforming protein that results is implicated in various malignancies, including lung adenocarcinoma, mucinous adenoma, ductal carcinoma of the pancreas and colorectal car…	chr12:25250929-25205246	GO:0038002 endocrine signaling;GO:0021896 forebrain astrocyte differentiation;GO:0021897 forebrain astrocyte development	[GO:0007165] signal transduction; [GO:0008150] biological_process; [GO:0005575] cellular_component; [GO:0003674] molecular_function; [GO:0043167] ion binding; [GO:0003924] GTPase activity; [GO:0006464] cellular protein modification process; [GO:0005737] cytoplasm; [GO:0005622] intracellular; [GO:0005886] plasma membrane; [GO:0005829] cytosol; [GO:0006950] response to stress; [GO:0002376] immune s…	GO:0031234 extrinsic component of cytoplasmic side of plasma membrane;GO:0009898 cytoplasmic side of plasma membrane;GO:0019897 extrinsic component of plasma membrane	GO:0019002 GMP binding;GO:0030275 LRR domain binding;GO:0019003 GDP binding		Predicted intracellular proteins; Disease related genes; Cancer-related genes:Candidate cancer biomarkers; Cancer-related genes:Mutational cancer driver genes; RAS pathway related proteins; Cancer-related genes:Mutated cancer genes	[IPR001806] Small GTPase; [IPR005225] Small GTP-binding protein domain; [IPR020849] Small GTPase superfamily, Ras-type; [IPR027417] P-loop containing nucleoside triphosphate hydrolase									MP:0005367 renal/urinary system phenotype; MP:0005370 liver/biliary system phenotype; MP:0005385 cardiovascular system phenotype; MP:0010768 mortality/aging; MP:0005369 muscle phenotype; MP:0005376 homeostasis/metabolism phenotype; MP:0005384 cellular phenotype; MP:0005378 growth/size/body region phenotype; MP:0005381 digestive/alimentary phenotype; MP:0005387 immune system phenotype; MP:0002006 …	[ORPHA:1340] CARDIOFACIOCUTANEOUS SYNDROME; [ORPHA:146] Differentiated thyroid carcinoma; [ORPHA:2396] Encephalocraniocutaneous lipomatosis; [ORPHA:1333] Familial pancreatic carcinoma; [ORPHA:86834] Juvenile myelomonocytic leukemia; [ORPHA:2612] Linear nevus sebaceus syndrome; [ORPHA:144] Lynch syndrome; [ORPHA:648] Noonan Syndrome; [ORPHA:251615] Pilomyxoid astrocytoma; [ORPHA:268114] RAS-associ…	OMIM ID:190070 Kras protooncogene, gtpase	Noonan syndrome 3; Rasopathy; Neoplasm of the large intestine; Epidermal nevus syndrome; Angiosarcoma; Neoplasm of the thyroid gland; Non-small cell lung cancer; Adenocarcinoma of stomach; Hepatocellular carcinoma; Multiple myeloma; Carcinoma of esophagus; Malignant melanoma of skin; OCULOECTODERMAL SYNDROME, SOMATIC; Cardio-facio-cutaneous syndrome; Noonan syndrome; Acute myeloid leukemia; Juven…	Heart Diseases;Liver Cirrhosis, Biliary;Neuroblastoma;Platelet Function Tests	Alzheimer Disease;Dysmenorrhea;Glucose;Hydrochlorothiazide	[115150] CARDIOFACIOCUTANEOUS SYNDROME; [609942] NOONAN SYNDROME TYPE 3	Acute myeloid leukemia: drug response,likely pathogenic,not provided,pathogenic; Adenocarcinoma of stomach: likely pathogenic,pathogenic; Adenoid cystic carcinoma: likely pathogenic,not provided,pathogenic; Bladder cancer, transitional cell, somatic: likely pathogenic,pathogenic; Bladder cancer, somatic: likely pathogenic,not provided,pathogenic; Breast adenocarcinoma: drug response,likely pathog…	HP:0012803:Anisometropia; HP:0002763:Abnormal cartilage morphology; HP:0010817:Linear nevus sebaceous; HP:0010815:Nevus sebaceous; HP:0010816:Epidermal nevus; HP:0005281:Hypoplastic nasal bridge; HP:0011995:Atrial septal dilatation; HP:0040188:Osteochondrosis; HP:0002582:Chronic atrophic gastritis; HP:0008749:Laryngeal hypoplasia; HP:0002731:Decreased lymphocyte apoptosis; HP:0001780:Abnormality …	[(3,7,11-TRIMETHYL-DODECA-2,6,10-TRIENYLOXYCARBAMOYL)-METHYL]-PHOSPHONIC ACID; Farnesyl diphosphate; MRTX849; AMG-510	APLASIA CUTIS CONGENITA WITH EPIBULBAR DERMOIDS; BLADDER CANCER, TRANSITIONAL CELL, SOMATIC; Bladder dysplasia; Botryoid rhabdomyosarcoma; CARDIOFACIOCUTANEOUS SYNDROME 2; COLORECTAL CANCER WITH CHROMOSOMAL INSTABILITY; Colloid Carcinoma of the Pancreas; Delayed female puberty; Dilated aortic root; Distal Bile Duct Carcinoma; Oncocytic Schneiderian papilloma; Palatal Neoplasms; Primary low grade …	2325	2455	[{"UniProt":"P01116","EnsemblGene":["ENSG00000133703"],"RefSeq":[["XM_006719069","XP_006719132"],["XM_011520653","XP_011518955"]],"SwissProt":["RASK_HUMAN"]},{"UniProt":"A0A024RAV5","RefSeq":[["NM_004985","NP_004976","REVIEWED"],["XM_011520653","XP_011518955"]],"SwissProt":["A0A024RAV5_HUMAN"]},{"UniProt":"I1SRC5","RefSeq":[["NM_033360","NP_203524","REVIEWED"]],"SwissProt":["I1SRC5_HUMAN"]},{"Uni…		Distribution: Detected in all; Specificity: Low tissue specificity	antibody: Moderate to strong cytoplasmic and membranous positivity was displayed in several tissues including the gastrointestinal tract, fallopian tube and renal tubules. Lymphoid germinal center cells showed moderate nuclear staining. Cells in CNS, testis, liver, squamous epithelia, female genitalia and muscle tissues were weakly stained or negative.; Cytoplasmic and membranous expression in se…	Antibody: Moderate to strong cytoplasmic and membranous immunoreactivity was displayed in several Hodgkin's lymphomas, colorectal and stomach cancers along with a few ovarian, endometrial, prostate, liver and pancreatic cancers. Remaining cancer cells were weakly stained or negative.	(M134)PID TCR RAS PATHWAY; (M269)PID RAS PATHWAY; (M270)PID MAPK TRK PATHWAY	(ko04320)Dorso-ventral axis formation; (hsa04320)Dorso-ventral axis formation; (ko05216)Thyroid cancer				(M10401)BIOCARTA TEL PATHWAY
Oncogene	KIT	3815	C-Kit|CD117|MASTC|PBT|SCFR	KIT proto-oncogene, receptor tyrosine kinase	This gene encodes a receptor tyrosine kinase. This gene was initially identified as a homolog of the feline sarcoma viral oncogene v-kit and is often referred to as proto-oncogene c-Kit. The canonical form of this glycosylated transmembrane protein has an N-terminal extracellular region with five immunoglobulin-like domains, a transmembrane region, and an intracellular tyrosine kinase domain at t…	chr4:54657957-54740715	GO:0097326 melanocyte adhesion;GO:0014828 distal stomach smooth muscle contraction;GO:0120064 stomach pylorus smooth muscle contraction	[GO:0003674] molecular_function; [GO:0043167] ion binding; [GO:0008150] biological_process; [GO:0006464] cellular protein modification process; [GO:0016301] kinase activity; [GO:0007165] signal transduction; [GO:0002376] immune system process; [GO:0005575] cellular_component; [GO:0005576] extracellular region; [GO:0005615] extracellular space; [GO:0030154] cell differentiation; [GO:0048856] anato…	GO:0042629 mast cell granule;GO:0001669 acrosomal vesicle;GO:0001650 fibrillar center	GO:0005020 stem cell factor receptor activity;GO:0042169 SH2 domain binding;GO:0004714 transmembrane receptor protein tyrosine kinase activity	Tyr protein kinase family	CD markers; FDA approved drug targets:Small molecule drugs; Disease related genes; FDA approved drug targets:Biotech drugs; Cancer-related genes:Candidate cancer biomarkers; Cancer-related genes:Mutational cancer driver genes; Enzymes; Kinases:Tyr protein kinases; ENZYME proteins:Transferases; RAS pathway related proteins; Cancer-related genes:Mutated cancer genes	[IPR000719] Protein kinase domain; [IPR001245] Serine-threonine/tyrosine-protein kinase, catalytic domain; [IPR001824] Tyrosine-protein kinase, receptor class III, conserved site; [IPR003598] Immunoglobulin subtype 2; [IPR003599] Immunoglobulin subtype; [IPR007110] Immunoglobulin-like domain; [IPR008266] Tyrosine-protein kinase, active site; [IPR011009] Protein kinase-like domain superfamily; [IP…	Plasma membrane (reliability'])			yes	yes	yes		yes	MP:0005367 renal/urinary system phenotype; MP:0005370 liver/biliary system phenotype; MP:0005385 cardiovascular system phenotype; MP:0010768 mortality/aging; MP:0005369 muscle phenotype; MP:0005376 homeostasis/metabolism phenotype; MP:0005384 cellular phenotype; MP:0005378 growth/size/body region phenotype; MP:0005386 behavior/neurological phenotype; MP:0005381 digestive/alimentary phenotype; MP:…	[ORPHA:98834] Acute myeloblastic leukemia with maturation; [ORPHA:98829] Acute myeloid leukemia with abnormal bone marrow eosinophils inv16p13q22 or t16; [ORPHA:102724] Acute myeloid leukemia with t8; [ORPHA:280785] Bullous diffuse cutaneous mastocytosis; [ORPHA:79455] Cutaneous mastocytoma; [ORPHA:44890] Gastrointestinal stromal tumor; [ORPHA:158778] Isolated bone marrow mastocytosis; [ORPHA:158…	OMIM ID:164920 Kit protooncogene, receptor tyrosine kinase	Gastrointestinal stromal tumor; Cutaneous mastocytosis; B Lymphoblastic Leukemia/Lymphoma with t(v;11q23.3); KMT2A Rearranged; Partial albinism; Malignant melanoma of skin; Adenocarcinoma of stomach; Cutaneous melanoma; Mast cell disease, systemic; Myeloproliferative Neoplasm; Acute myeloid leukemia; Thymoma; Non-small cell lung cancer; Piebaldism, progressive; Gastrointestinal stromal tumor, fam…	Anger;Atherosclerosis;Basophils;Breast Neoplasms;Insulin-Like Growth Factor I;Maximal Midexpiratory Flow Rate;Platelet Function Tests	Bipolar Disorder;Body Height;Breast Feeding;Bronchodilator Agents;Drug Resistance;Erythrocyte Count;Erythrocyte Indices;Forced Expiratory Volume;Hematocrit;Hemoglobins;Schizophrenia	[172800] human piebaldism	Acute myeloid leukemia: likely pathogenic,other,pathogenic,uncertain significance; Adenocarcinoma of stomach: likely pathogenic,pathogenic; Clinvar: phenotype not specified: likely pathogenic,other,pathogenic; Cutaneous mastocytosis: likely pathogenic,other,pathogenic,uncertain significance; Cutaneous melanoma: likely pathogenic,not provided,other,pathogenic,uncertain significance; Dysgerminoma: …	HP:0007583:Telangiectasia macularis eruptiva perstans; HP:0200151:Cutaneous mastocytosis; HP:0007542:Absent pigmentation of the ventral chest; HP:0007544:Piebaldism; HP:0005587:Profuse pigmented skin lesions; HP:0100495:Mastocytosis; HP:0012325:Chronic myelomonocytic leukemia; HP:0100768:Choriocarcinoma; HP:0009792:Teratoma; HP:0012539:Non-Hodgkin lymphoma; HP:0006543:Cardiorespiratory arrest; HP…	Sorafenib; Imatinib; Dasatinib; Sunitinib; Phosphonotyrosine; Nilotinib; XL820; OSI-930; ABT-869; Pazopanib; Midostaurin; Regorafenib; Ponatinib; Lenvatinib; Ancestim; Fostamatinib; Erdafitinib; Amuvatinib; Pexidartinib; Ripretinib; Avapritinib	B lymphoblastic leukemia lymphoma with t(v;11q23); MLL rearranged; Esophageal Melanoma; Familial mastocytosis; GASTROINTESTINAL STROMAL TUMOR, FAMILIAL; Gammopathy; Gastroduodenal intussusception; Gastrointestinal Stromal Tumor of the Gastrointestinal Tract; Hidrocystoma; Idiopathic anaphylaxis; Intermediate Risk Gastrointestinal Stromal Tumor; Isolated bone marrow mastocytosis; MASTOCYTOSIS, CUT…	930	1060	[{"UniProt":"P10721","EnsemblGene":["ENSG00000157404"],"SwissProt":["KIT_HUMAN"]},{"UniProt":"A0A0U2N547","RefSeq":[["XM_017008180","XP_016863669"]],"SwissProt":["A0A0U2N547_HUMAN"]}]	ovary	Distribution: Detected in all; Specificity: Tissue enhanced	antibody: A subset of inflammatory cells were distinctly positive in the cytoplasm. Molecular layer of cerebellum and melanocytes were moderately stained. Remaining normal tissues were mainly negative.; Selective cytoplasmic and membranous expression in a few cell types including subset of cells in breast, melanocytes in skin, basket cells in cerebellum and subsets of peripheral immune cells.	Antibody: Cancer cells were generally negative. Several cases of melanoma and testicular seminoma as well as a rare case of basal cell carcinoma and urothelial cancer displayed moderate to strong cytoplasmic and membranous staining.	(M231)PID KIT PATHWAY; (M195)PID CMYB PATHWAY	(ko05221)Acute myeloid leukemia; (ko05230)Central carbon metabolism in cancer; (hsa05221)Acute myeloid leukemia			(M5942)HALLMARK UV RESPONSE DN	(M22035)BIOCARTA MELANOCYTE PATHWAY; (M85)BIOCARTA BAD PATHWAY
Oncogene	JAK2	3717	JTK10	Janus kinase 2	This gene encodes a non-receptor tyrosine kinase that plays a central role in cytokine and growth factor signalling. The primary isoform of this protein has an N-terminal FERM domain that is required for erythropoietin receptor association, an SH2 domain that binds STAT transcription factors, a pseudokinase domain and a C-terminal tyrosine kinase domain. Cytokine binding induces autophosphorylati…	chr9:4984390-5129948	GO:0031959 mineralocorticoid receptor signaling pathway;GO:0035406 histone-tyrosine phosphorylation;GO:0035409 histone H3-Y41 phosphorylation	[GO:0003674] molecular_function; [GO:0043167] ion binding; [GO:0005575] cellular_component; [GO:0008150] biological_process; [GO:0006464] cellular protein modification process; [GO:0005622] intracellular; [GO:0043226] organelle; [GO:0005856] cytoskeleton; [GO:0007165] signal transduction; [GO:0016301] kinase activity; [GO:0042393] histone binding; [GO:0005634] nucleus; [GO:0005654] nucleoplasm; […	GO:0031904 endosome lumen;GO:0005901 caveola;GO:0016363 nuclear matrix	GO:0035400 histone tyrosine kinase activity;GO:0035401 histone kinase activity (H3-Y41 specific);GO:0005143 interleukin-12 receptor binding	Tyr protein kinase family	Predicted intracellular proteins; FDA approved drug targets:Small molecule drugs; Disease related genes; Cancer-related genes:Mutational cancer driver genes; Enzymes; Kinases:Tyr protein kinases; ENZYME proteins:Transferases	[IPR000299] FERM domain; [IPR000719] Protein kinase domain; [IPR000980] SH2 domain; [IPR001245] Serine-threonine/tyrosine-protein kinase, catalytic domain; [IPR011009] Protein kinase-like domain superfamily; [IPR016251] Tyrosine-protein kinase, non-receptor Jak/Tyk2; [IPR019748] FERM central domain; [IPR019749] Band 4.1 domain; [IPR020635] Tyrosine-protein kinase, catalytic domain; [IPR020693] Ty…	Nucleoplasm (reliability']); Additional: Focal adhesion sites;Plasma membrane					yes	principal1		MP:0005370 liver/biliary system phenotype; MP:0005385 cardiovascular system phenotype; MP:0010768 mortality/aging; MP:0005376 homeostasis/metabolism phenotype; MP:0005384 cellular phenotype; MP:0005378 growth/size/body region phenotype; MP:0005386 behavior/neurological phenotype; MP:0005387 immune system phenotype; MP:0002006 neoplasm; MP:0005389 reproductive system phenotype; MP:0005390 skeleton…	[ORPHA:131] BUDD-CHIARI SYNDROME; [ORPHA:3318] Essential thrombocythemia; [ORPHA:71493] Familial thrombocytosis; [ORPHA:729] POLYCYTHEMIA VERA; [ORPHA:824] Primary myelofibrosis	OMIM ID:147796 Janus kinase 2	Myeloproliferative disorder; Lymphoblastic leukemia, acute, with lymphomatous features; Thrombocythemia 3; ERYTHROCYTOSIS, JAK2-RELATED, SOMATIC; Acute myeloid leukemia; Chronic myelogenous leukemia, BCR-ABL1 positive; Myelofibrosis; Splenomegaly; Polycythemia vera; Polycythemia (disease); Budd-Chiari syndrome; Primary familial polycythemia due to EPO receptor mutation; Budd-Chiari syndrome, susc…	Alcoholism;Exercise Test	Arthritis, Juvenile;Autoimmune Diseases;Celiac Disease;Colitis, Ulcerative;Common Variable Immunodeficiency;Crohn Disease;Diabetes Mellitus, Type 1;Emotions;Inflammatory Bowel Diseases;Lupus Erythematosus, Systemic;Myeloproliferative Disorders;Oropharyngeal Neoplasms;Psoriasis;Spondylitis, Ankylosing;Thyroid Diseases		Acute myeloid leukemia: likely pathogenic,not provided,pathogenic,risk factor; Budd-chiari syndrome: likely pathogenic,not provided,pathogenic,risk factor; Budd-chiari syndrome, susceptibility to, somatic: likely pathogenic,not provided,pathogenic,risk factor; Chronic myelogenous leukemia: likely pathogenic,not provided,pathogenic,risk factor; Erythrocytosis, jak2-related, somatic: pathogenic; Fa…	HP:0001050:Plethora; HP:0002641:Peripheral thrombosis; HP:0011134:Low-grade fever; HP:0001898:Increased red blood cell mass; HP:0002639:Budd-Chiari syndrome; HP:0030157:Flank pain; HP:0001899:Increased hematocrit; HP:0002586:Peritonitis; HP:0001900:Increased hemoglobin; HP:0005513:Increased megakaryocyte count; HP:0004377:Hematological neoplasm; HP:0030242:Portal vein thrombosis; HP:0004417:Inter…	2-tert-butyl-9-fluoro-1,6-dihydrobenzo[h]imidazo[4,5-f]isoquinolin-7-one; XL019; 5-phenyl-1H-indazol-3-amine; 4-(3-amino-1H-indazol-5-yl)-N-tert-butylbenzenesulfonamide; 4-[(2-{4-[(CYCLOPROPYLCARBAMOYL)AMINO]-1H-PYRAZOL-3-YL}-1H-BENZIMIDAZOL-6-YL)METHYL]MORPHOLIN-4-IUM; Ruxolitinib; Tofacitinib; Baricitinib; Entrectinib; Fostamatinib; Fedratinib; Zanubrutinib	BUDD-CHIARI SYNDROME, SUSCEPTIBILITY TO, SOMATIC; ERYTHROCYTOSIS, JAK2-RELATED, SOMATIC; Leukoerythroblastic Anemia; Myelodysplastic/myeloproliferative neoplasm, unclassifiable; Prefibrotic/Early Primary Myelofibrosis; Refractory anemia with ringed sideroblasts associated with marked thrombocytosis; THROMBOCYTHEMIA 3; Arterial insufficiency; Florid red complexion (finding); Inherited predispositi…	1302	1551	[{"UniProt":"O60674","EnsemblGene":["ENSG00000096968"],"EnsemblTrans":[["ENST00000381652","ENSP00000371067","principal1"]],"RefSeq":[["NM_001322194","NP_001309123","REVIEWED"],["NM_001322195","NP_001309124","REVIEWED"],["NM_001322196","NP_001309125","REVIEWED"],["NM_001322204","NP_001309133","REVIEWED"],["NM_004972","NP_004963","REVIEWED"]],"UCSC":["uc003ziw.3"],"SwissProt":["JAK2_HUMAN"]},{"UniP…	bone_marrow	Distribution: Detected in all; Specificity: Low tissue specificity	Cytoplasmic expression in several tissues, most abundant in subsets of immune cells.; antibody: Strong and granular cytoplasmic immunoreactivity was mainly seen in non-follicular lymphoid cells, hepatocytes, kidney and in several glandular epithelia. Most cells of the CNS except Purkinje cells were negative or showed weak staining.	Antibody: Tumour tissues showed weak to moderate cytoplasmic staining. Lymphomas showed strong staining in most cases. Single cases of prostate, ovarian, cervical and liver cancers were also strongly stained. Most cases of gliomas, skin cancers and renal cancers were negative. Other malignancies were weakly to moderately stained.	(M135)PID IL5 PATHWAY; (M36)PID IL27 PATHWAY; (M182)PID IL3 PATHWAY	(hsa04920)Adipocytokine signaling pathway; (ko04920)Adipocytokine signaling pathway; (ko05140)Leishmaniasis	(hsa)JAK-STAT signaling; (M00684)JAK-STAT signaling		(M5906)HALLMARK ESTROGEN RESPONSE EARLY; (M5907)HALLMARK ESTROGEN RESPONSE LATE; (M5913)HALLMARK INTERFERON GAMMA RESPONSE	(M22085)BIOCARTA IFNG PATHWAY; (M22063)BIOCARTA STAT3 PATHWAY; (M8066)BIOCARTA IL22BP PATHWAY
Oncogene	HRAS	3265	C-BAS/HAS|C-H-RAS|C-HA-RAS1|CTLO|H-RASIDX|HAMSV|HRAS1|RASH1|p21ras	HRas proto-oncogene, GTPase	This gene belongs to the Ras oncogene family, whose members are related to the transforming genes of mammalian sarcoma retroviruses. The products encoded by these genes function in signal transduction pathways. These proteins can bind GTP and GDP, and they have intrinsic GTPase activity. This protein undergoes a continuous cycle of de- and re-palmitoylation, which regulates its rapid exchange bet…	chr11:535576-532242	GO:0035900 response to isolation stress;GO:2000630 positive regulation of miRNA metabolic process;GO:0098696 regulation of neurotransmitter receptor localization to postsynaptic specialization membrane	[GO:0007165] signal transduction; [GO:0008150] biological_process; [GO:0005575] cellular_component; [GO:0003674] molecular_function; [GO:0043167] ion binding; [GO:0003924] GTPase activity; [GO:0008283] cell population proliferation; [GO:0006464] cellular protein modification process; [GO:0040011] locomotion; [GO:0048870] cell motility; [GO:0034641] cellular nitrogen compound metabolic process; [G…	GO:0098978 glutamatergic synapse;GO:0048471 perinuclear region of cytoplasm;GO:0000139 Golgi membrane	GO:0019003 GDP binding;GO:0008022 protein C-terminus binding;GO:0003924 GTPase activity		Predicted intracellular proteins; Disease related genes; Cancer-related genes:Candidate cancer biomarkers; Cancer-related genes:Mutational cancer driver genes; RAS pathway related proteins; Cancer-related genes:Mutated cancer genes	[IPR001806] Small GTPase; [IPR005225] Small GTP-binding protein domain; [IPR020849] Small GTPase superfamily, Ras-type; [IPR027417] P-loop containing nucleoside triphosphate hydrolase	Cytosol;Nucleoplasm (reliability'])					yes			MP:0005367 renal/urinary system phenotype; MP:0005385 cardiovascular system phenotype; MP:0010768 mortality/aging; MP:0005369 muscle phenotype; MP:0005376 homeostasis/metabolism phenotype; MP:0005384 cellular phenotype; MP:0005378 growth/size/body region phenotype; MP:0005386 behavior/neurological phenotype; MP:0005381 digestive/alimentary phenotype; MP:0005387 immune system phenotype; MP:0002006…	[ORPHA:3071] COSTELLO SYNDROME; [ORPHA:146] Differentiated thyroid carcinoma; [ORPHA:2612] Linear nevus sebaceus syndrome; [ORPHA:2874] Phakomatosis pigmentokeratotica; [ORPHA:79414] Woolly hair nevus	OMIM ID:190020 Hras protooncogene, gtpase	Vascular Tumors Including Pyogenic Granuloma; Lung adenocarcinoma; Neoplasm of the thyroid gland; Malignant neoplasm of body of uterus; Adenocarcinoma of stomach; Neoplasm of the large intestine; Malignant melanoma of skin; Pancreatic adenocarcinoma; Chronic lymphocytic leukemia; Transitional cell carcinoma of the bladder; Multiple myeloma; Squamous cell lung carcinoma; Hepatocellular carcinoma; …			[218040] CONGENITAL MYOPATHY WITH EXCESS OF MUSCLE SPINDLES; [218040] COSTELLO SYNDROME	Acute myeloid leukemia: likely pathogenic,not provided,pathogenic; Adenocarcinoma of prostate: likely pathogenic,pathogenic; Adenocarcinoma of stomach: likely pathogenic,not provided,pathogenic; Adenoid cystic carcinoma: likely pathogenic,pathogenic; Bladder cancer, somatic: likely pathogenic,pathogenic; Costello syndrome: likely pathogenic,not provided,pathogenic,uncertain significance; Costello…	HP:0025510:Nevus spilus; HP:0004690:Thickened Achilles tendon; HP:0031842:Lymphangiectasis; HP:0012081:Enlarged cerebellum; HP:0010817:Linear nevus sebaceous; HP:0010815:Nevus sebaceous; HP:0005600:Congenital giant melanocytic nevus; HP:0002862:Bladder carcinoma; HP:0009588:Vestibular Schwannoma; HP:0010759:Prominence of the premaxilla; HP:0001814:Deep-set nails; HP:0001780:Abnormality of toe; HP…	Hexane-1,6-Diol; Trifluoroethanol; Guanosine-5'-Triphosphate; Guanosine-5'-Diphosphate; N,N'-DIMETHYL-N-(ACETYL)-N'-(7-NITROBENZ-2-OXA-1,3-DIAZOL-4-YL)ETHYLENEDIAMINE	COSTELLO SYNDROME, SEVERE; EPIDERMAL NEVUS WITH UROTHELIAL CANCER, SOMATIC; MYOPATHY, CONGENITAL, WITH EXCESS OF MUSCLE SPINDLES; Malignant neoplasm of spleen; Milia, Multiple Eruptive; NEVUS SPILUS, SOMATIC; Poor respiratory effort; SPITZ NEVUS, SOMATIC; Woolly hair nevus; Facial wart; Malignant melanoma - category; Phacomatosis pigmentokeratotica; Rhabdomyosarcoma with ganglionic differentiatio…	482	749	[{"UniProt":"P01112","EnsemblGene":["ENSG00000174775","ENSG00000276536"],"RefSeq":[["NM_001318054","NP_001304983","REVIEWED"]],"SwissProt":["RASH_HUMAN"]},{"UniProt":"X5D945","RefSeq":[["NM_001130442","NP_001123914","REVIEWED"],["NM_005343","NP_005334","REVIEWED"]],"UCSC":["uc001lpv.4"],"SwissProt":["X5D945_HUMAN"]}]	bone;tongue	Distribution: Detected in all; Specificity: Low tissue specificity	antibody: Strong cytoplasmic staining was observed in the CNS, lymphoid tissues and most glandular epithelia. Other normal tissues were in general weakly or moderately stained.; Cytoplasmic and membranous expression in most tissues.	Antibody: Cytoplasmic positivity of varying intensity was observed mainly in gliomas, lymphomas, testicular cancers and breast cancers. Most other cancer tissues were weakly stained.	(M134)PID TCR RAS PATHWAY; (M18895)SA TRKA RECEPTOR; (M17200)SA B CELL RECEPTOR COMPLEXES	(ko05216)Thyroid cancer; (hsa05216)Thyroid cancer; (ko05219)Bladder cancer			(M5949)HALLMARK PEROXISOME; (M5923)HALLMARK PI3K AKT MTOR SIGNALING; (M5915)HALLMARK APICAL JUNCTION	(M22052)BIOCARTA SAM68 PATHWAY; (M22037)BIOCARTA HBX PATHWAY; (M22068)BIOCARTA RECK PATHWAY
Oncogene	ABL1	25	ABL|BCR-ABL|CHDSKM|JTK7|bcr/abl|c-ABL|c-ABL1|p150|v-abl	ABL proto-oncogene 1, non-receptor tyrosine kinase	This gene is a protooncogene that encodes a protein tyrosine kinase involved in a variety of cellular processes, including cell division, adhesion, differentiation, and response to stress. The activity of the protein is negatively regulated by its SH3 domain, whereby deletion of the region encoding this domain results in an oncogene. The ubiquitously expressed protein has DNA-binding activity tha…	chr9:130713881-130887675	GO:0002332 transitional stage B cell differentiation;GO:0002333 transitional one stage B cell differentiation;GO:1904531 positive regulation of actin filament binding	[GO:0003674] molecular_function; [GO:0043167] ion binding; [GO:0008150] biological_process; [GO:0006464] cellular protein modification process; [GO:0016301] kinase activity; [GO:0040011] locomotion; [GO:0048870] cell motility; [GO:0005575] cellular_component; [GO:0005622] intracellular; [GO:0043226] organelle; [GO:0005634] nucleus; [GO:0007267] cell-cell signaling; [GO:0005737] cytoplasm; [GO:000…	GO:0031965 nuclear membrane;GO:0031252 cell leading edge;GO:0005635 nuclear envelope	GO:0004515 nicotinate-nucleotide adenylyltransferase activity;GO:0038191 neuropilin binding;GO:0097100 supercoiled DNA binding	Tyr protein kinase family	Predicted intracellular proteins; FDA approved drug targets:Small molecule drugs; Disease related genes; Cancer-related genes:Candidate cancer biomarkers; Cancer-related genes:Mutational cancer driver genes; Enzymes; Kinases:Tyr protein kinases; ENZYME proteins:Transferases; RAS pathway related proteins	[IPR000719] Protein kinase domain; [IPR000980] SH2 domain; [IPR001245] Serine-threonine/tyrosine-protein kinase, catalytic domain; [IPR001452] SH3 domain; [IPR008266] Tyrosine-protein kinase, active site; [IPR011009] Protein kinase-like domain superfamily; [IPR015015] F-actin binding; [IPR017441] Protein kinase, ATP binding site; [IPR020635] Tyrosine-protein kinase, catalytic domain; [IPR033221] …	Nucleoplasm (reliability']); Additional: Nuclear bodies								MP:0005370 liver/biliary system phenotype; MP:0005385 cardiovascular system phenotype; MP:0010768 mortality/aging; MP:0005369 muscle phenotype; MP:0005376 homeostasis/metabolism phenotype; MP:0005384 cellular phenotype; MP:0005378 growth/size/body region phenotype; MP:0005381 digestive/alimentary phenotype; MP:0005387 immune system phenotype; MP:0002006 neoplasm; MP:0003631 nervous system phenoty…	[ORPHA:521] Chronic myeloid leukemia; [ORPHA:99860] Precursor B-cell acute lymphoblastic leukemia; [ORPHA:99861] Precursor T-cell acute lymphoblastic leukemia	OMIM ID:189980 Abl protooncogene 1, nonreceptor tyrosine kinase	CONGENITAL HEART DEFECTS AND SKELETAL MALFORMATIONS SYNDROME; Chronic myelogenous leukemia, BCR-ABL1 positive; Lip and oral cavity carcinoma; Failure to thrive; Abnormality of skeletal morphology; Congenital heart disease; Leukemia, Philadelphia chromosome-positive, resistant to imatinib; Lymphoblastic leukemia, acute, with lymphomatous features	Hemoglobin A, Glycosylated;Lymphocyte Count;Neutrophils;Platelet Function Tests;gamma-Globulins	Drug Resistance	[617602] Congenital heart defects and skeletal malformations	Chronic myeloid leukemia, resistant to imatinib: likely pathogenic,pathogenic; Congenital heart defects and skeletal malformations syndrome: pathogenic; Chronic myelogenous leukemia: likely pathogenic,not provided,pathogenic; Clinvar: phenotype not specified: pathogenic; Congenital heart disease: pathogenic; Leukemia, philadelphia chromosome-positive, resistant to imatinib: likely pathogenic,path…	HP:0004848:Ph-positive acute lymphoblastic leukemia; HP:0004852:Reduced leukocyte alkaline phosphatase; HP:0002010:Narrow maxilla; HP:0001912:Abnormal basophil morphology; HP:0005506:Chronic myelogenous leukemia; HP:0005547:Myeloproliferative disorder; HP:0000460:Narrow nose; HP:0000977:Soft skin; HP:0040019:Finger clinodactyly; HP:0003189:Long nose; HP:0004396:Poor appetite; HP:0001894:Thrombocy…	ATP; Imatinib; Dasatinib; N-[4-Methyl-3-[[4-(3-Pyridinyl)-2-Pyrimidinyl]Amino]Phenyl]-3-Pyridinecarboxamide; Nilotinib; XL228; Bosutinib; 2-{[(6-OXO-1,6-DIHYDROPYRIDIN-3-YL)METHYL]AMINO}-N-[4-PROPYL-3-(TRIFLUOROMETHYL)PHENYL]BENZAMIDE; 1-[4-(PYRIDIN-4-YLOXY)PHENYL]-3-[3-(TRIFLUOROMETHYL)PHENYL]UREA; Myristic acid; PD-166326; 5-[3-(2-METHOXYPHENYL)-1H-PYRROLO[2,3-B]PYRIDIN-5-YL]-N,N-DIMETHYLPYRIDI…	Abnormality of skeletal morphology; CONGENITAL HEART DEFECTS AND SKELETAL MALFORMATIONS SYNDROME; Failure to gain weight; LEUKEMIA, PHILADELPHIA CHROMOSOME-POSITIVE, RESISTANT TO IMATINIB; Tubulocystic renal cell carcinoma; B Lymphoblastic Leukemia/Lymphoma, BCR-ABL1-Like; Reduced leukocyte alkaline phosphatase; Abnormal basophil morphology; Intraneural perineurioma; Narrow maxilla; Soft tissue p…	505	828	[{"UniProt":"P00519","EnsemblGene":["ENSG00000097007"],"SwissProt":["ABL1_HUMAN"]},{"UniProt":"A0A024R8E2","RefSeq":[["NM_005157","NP_005148","REVIEWED"]],"SwissProt":["A0A024R8E2_HUMAN"]},{"UniProt":"Q59FK4","RefSeq":[["NM_005157","NP_005148","REVIEWED"],["NM_007313","NP_009297","REVIEWED"]],"SwissProt":["Q59FK4_HUMAN"]}]	tongue	Distribution: Detected in all; Specificity: Low tissue specificity	antibody: A subset of cells in lymphoid tissues showed strong cytoplasmic positivity. Most remaining normal tissues were weakly stained or negative. ; Cytoplasmic and nuclear expression at variable levels in all tissues.	Antibody: Colorectal cancer and embryonal testicular cancer as well as several cases of prostate, breast, thyroid and gastric cancers showed moderate cytoplasmic positivity with a granular pattern. Remaining malignant cells were weakly stained or negative.	(M163)PID LIS1 PATHWAY; (M84)PID ATM PATHWAY; (M142)PID AJDISS 2PATHWAY	(ko05130)Pathogenic Escherichia coli infection; (hsa05130)Pathogenic Escherichia coli infection; (hsa05131)Shigellosis			(M5893)HALLMARK MITOTIC SPINDLE; (M5901)HALLMARK G2M CHECKPOINT	(M11358)BIOCARTA ARF PATHWAY; (M22005)BIOCARTA LIS1 PATHWAY; (M10628)BIOCARTA ATM PATHWAY
Oncogene	ALK	238	CD246|NBLST3	ALK receptor tyrosine kinase	This gene encodes a receptor tyrosine kinase, which belongs to the insulin receptor superfamily. This protein comprises an extracellular domain, an hydrophobic stretch corresponding to a single pass transmembrane region, and an intracellular kinase domain. It plays an important role in the development of the brain and exerts its effects on specific neurons in the nervous system. This gene has bee…	chr2:29921589-29190992	GO:0090648 response to environmental enrichment;GO:0036269 swimming behavior;GO:0060159 regulation of dopamine receptor signaling pathway	[GO:0003674] molecular_function; [GO:0043167] ion binding; [GO:0005575] cellular_component; [GO:0008150] biological_process; [GO:0006464] cellular protein modification process; [GO:0016301] kinase activity; [GO:0007165] signal transduction; [GO:0030154] cell differentiation; [GO:0048856] anatomical structure development; [GO:0005886] plasma membrane; [GO:0043226] organelle; [GO:0005576] extracell…	GO:0043235 receptor complex;GO:0005887 integral component of plasma membrane;GO:0031226 intrinsic component of plasma membrane	GO:0004704 NF-kappaB-inducing kinase activity;GO:0004714 transmembrane receptor protein tyrosine kinase activity;GO:0019199 transmembrane receptor protein kinase activity	Tyr protein kinase family	CD markers; Predicted intracellular proteins; FDA approved drug targets:Small molecule drugs; Disease related genes; Enzymes; Kinases:Tyr protein kinases; ENZYME proteins:Transferases; Cancer-related genes:Mutated cancer genes	[IPR000719] Protein kinase domain; [IPR001245] Serine-threonine/tyrosine-protein kinase, catalytic domain; [IPR002011] Tyrosine-protein kinase, receptor class II, conserved site; [IPR008266] Tyrosine-protein kinase, active site; [IPR011009] Protein kinase-like domain superfamily; [IPR017441] Protein kinase, ATP binding site; [IPR020635] Tyrosine-protein kinase, catalytic domain; [IPR000998] MAM d…	Plasma membrane (reliability'])			yes	yes	yes	principal1		MP:0010768 mortality/aging; MP:0005376 homeostasis/metabolism phenotype; MP:0005384 cellular phenotype; MP:0005378 growth/size/body region phenotype; MP:0005386 behavior/neurological phenotype; MP:0005389 reproductive system phenotype; MP:0003631 nervous system phenotype; MP:0005391 vision/eye phenotype; MP:0005390 skeleton phenotype; MP:0005379 endocrine/exocrine gland phenotype; MP:0010771 inte…	[ORPHA:300895] ALK-positive anaplastic large cell lymphoma; [ORPHA:364043] ALK-positive large B-cell lymphoma; [ORPHA:146] Differentiated thyroid carcinoma; [ORPHA:178342] Inflammatory myofibroblastic tumor; [ORPHA:635] Neuroblastoma; [ORPHA:357191] Selection of therapeutic option in non-small cell lung carcinoma	OMIM ID:105590 Anaplastic lymphoma kinase	Neuroblastoma; Neoplasm of the breast; Lung adenocarcinoma; Non-small cell lung cancer; Rhabdomyosarcoma (disease); Neuroblastoma 3; Benign Soft Tissue Neoplasm of Uncertain Differentiation; Neoplasm of brain	Alcoholism;Alkaline Phosphatase;Arteries;Atherosclerosis;Blood Pressure;Body Height;Cardiovascular Physiological Phenomena;Cholesterol, HDL;Cholesterol, LDL;Citalopram;Coronary Artery Disease;Depressive Disorder, Major;Diabetes Mellitus;Hemoglobin A, Glycosylated;Hemoglobins;Insulin;Insulin Resistance;Liver Cirrhosis, Biliary;Platelet Function Tests;Receptors, Tumor Necrosis Factor	Adiponectin;Body Mass Index;Glucose		Benign soft tissue neoplasm of uncertain differentiation: likely pathogenic,not provided,pathogenic; Clinvar: phenotype not specified: pathogenic,uncertain significance; Lung adenocarcinoma: likely pathogenic,not provided,pathogenic; Neoplasm of brain: likely pathogenic,pathogenic; Neoplasm of the breast: likely pathogenic,pathogenic; Neuroblastoma: likely pathogenic,not provided,pathogenic,uncer…	HP:0011976:Elevated urinary catecholamines; HP:0004375:Neoplasm of the nervous system	ATP; Crizotinib; Ceritinib; Alectinib; Fostamatinib; Lorlatinib; Gilteritinib; Brigatinib	Anaplastic Medulloblastoma; Anaplastic large cell lymphoma T- and null-cell types refractory; Leiomyoma of small intestine; Myxoid leiomyoma; NEUROBLASTOMA, SUSCEPTIBILITY TO, 3; Subclavicular lymphadenopathy; Tumor lysis syndrome (spontaneous); Compound nevus of skin; Congenital neuroblastoma; Deep Penetrating Nevus; Disorder of pericardium; Granuloma, Plasma Cell; Inflammatory pseudotumor of li…	634	676	[{"UniProt":"Q9UM73","EnsemblGene":["ENSG00000171094"],"EnsemblTrans":[["ENST00000389048","ENSP00000373700","principal1"]],"RefSeq":[["NM_004304","NP_004295","REVIEWED"]],"UCSC":["uc002rmy.4"],"SwissProt":["ALK_HUMAN"]},{"UniProt":"B6D4Y2","RefSeq":[["NM_004304","NP_004295","REVIEWED"]],"SwissProt":["B6D4Y2_HUMAN"]}]		Distribution: Detected in many; Specificity: Tissue enhanced	antibody: Neuronal cells and skeletal muscle showed strong cytoplasmic and nuclear immunoreactivity. Distinct luminal staining was observed in a number of tissues, e.g. the intestine, endometrial glands and fallopian tube. Most other normal tissues showed weak cytoplasmic positivity, sometimes combined with nuclear staining.; Cytoplasmic and nuclear expression in several different tissue types, m…	Antibody: Moderate to strong cytoplasmic staining with a granular pattern was observed in basal cell skin carcinomas, the majority of prostate cancers and a few gliomas and melanomas. Remaining cancer tissues displayed weak cytoplasmic staining or were negative.		(ko05223)Non-small cell lung cancer; (hsa05223)Non-small cell lung cancer; (hsa05200)Pathways in cancer
Oncogene	FGFR2	2263	BBDS|BEK|BFR-1|CD332|CEK3|CFD1|ECT1|JWS|K-SAM|KGFR|TK14|TK25	fibroblast growth factor receptor 2	The protein encoded by this gene is a member of the fibroblast growth factor receptor family, where amino acid sequence is highly conserved between members and throughout evolution. FGFR family members differ from one another in their ligand affinities and tissue distribution. A full-length representative protein consists of an extracellular region, composed of three immunoglobulin-like domains, …	chr10:121598458-121478330	GO:0035602 fibroblast growth factor receptor signaling pathway involved in negative regulation of apoptotic process in bone marrow;GO:0035603 fibroblast growth factor receptor signaling pathway involved in hemopoiesis;GO:0035604 fibroblast growth factor receptor signaling pathway involved in positive regulation of cell proliferation in bone marrow	[GO:0005575] cellular_component; [GO:0003674] molecular_function; [GO:0043167] ion binding; [GO:0008150] biological_process; [GO:0006464] cellular protein modification process; [GO:0016301] kinase activity; [GO:0007165] signal transduction; [GO:0008283] cell population proliferation; [GO:0005622] intracellular; [GO:0043226] organelle; [GO:0005634] nucleus; [GO:0005737] cytoplasm; [GO:0005886] pla…	GO:0060076 excitatory synapse;GO:0005938 cell cortex;GO:0062023 collagen-containing extracellular matrix	GO:0005007 fibroblast growth factor-activated receptor activity;GO:0017134 fibroblast growth factor binding;GO:0004714 transmembrane receptor protein tyrosine kinase activity	Tyr protein kinase family	CD markers; Predicted intracellular proteins; FDA approved drug targets:Small molecule drugs; Disease related genes; FDA approved drug targets:Biotech drugs; Cancer-related genes:Candidate cancer biomarkers; Cancer-related genes:Mutational cancer driver genes; Predicted secreted proteins; Enzymes; Kinases:Tyr protein kinases; ENZYME proteins:Transferases; RAS pathway related proteins; Cancer-rela…	[IPR000719] Protein kinase domain; [IPR001245] Serine-threonine/tyrosine-protein kinase, catalytic domain; [IPR003598] Immunoglobulin subtype 2; [IPR003599] Immunoglobulin subtype; [IPR007110] Immunoglobulin-like domain; [IPR008266] Tyrosine-protein kinase, active site; [IPR011009] Protein kinase-like domain superfamily; [IPR013098] Immunoglobulin I-set; [IPR013783] Immunoglobulin-like fold; [IPR…	Cell Junctions (reliability']); Additional: Nucleoplasm;Vesicles	yes	yes	yes	yes	yes		yes	MP:0005367 renal/urinary system phenotype; MP:0005370 liver/biliary system phenotype; MP:0005385 cardiovascular system phenotype; MP:0010768 mortality/aging; MP:0005369 muscle phenotype; MP:0005376 homeostasis/metabolism phenotype; MP:0005384 cellular phenotype; MP:0005378 growth/size/body region phenotype; MP:0005386 behavior/neurological phenotype; MP:0005381 digestive/alimentary phenotype; MP:…	[ORPHA:83] Antley-Bixler syndrome; [ORPHA:87] APERT SYNDROME; [ORPHA:207] Crouzon disease; [ORPHA:1555] Cutis gyrata-acanthosis nigricans-craniosynostosis syndrome; [ORPHA:313855] FGFR2-related bent bone dysplasia; [ORPHA:168624] Familial scaphocephaly syndrome McGillivray type; [ORPHA:1540] JACKSON-WEISS SYNDROME; [ORPHA:2363] LACRIMOAURICULODENTODIGITAL SYNDROME; [ORPHA:93258] Pfeiffer syndrome…	OMIM ID:176943 Fibroblast growth factor receptor 2	FGFR2 related craniosynostosis; Ectrodactyly; Levy-Hollister syndrome; Crouzon syndrome; Scaphocephaly, maxillary retrusion, and mental retardation; Pfeiffer syndrome; Antley-Bixler syndrome without genital anomalies or disordered steroidogenesis; Saethre-Chotzen syndrome; Beare-Stevenson cutis gyrata syndrome; Neoplasm of stomach; Acrocephalosyndactyly type I; Bent bone dysplasia syndrome; Jacks…	Anthropometry;Cholesterol, LDL;Dehydroepiandrosterone;Glomerular Filtration Rate;Hemoglobin A2	Adenocarcinoma of lung;Breast Neoplasms;Carcinoma, Endometrioid;Carcinoma, Non-Small-Cell Lung;Colorectal Neoplasms;Deglutition Disorders;Gout;HER2(776-788);Lung Neoplasms;Magnesium;Otitis;Ovarian Neoplasms;Prostate-Specific Antigen;Prostatic Neoplasms	[101600] ACROCEPHALOSYNDACTYLY TYPE V; [207410] Antley-Bixler syndrome; [101200] APERT SYNDROME; [123790] Beare-Stevenson Cutis Gyrata syndrome; [123500] CROUZON SYNDROME; [609579] FAMILIAL SCAPHOCEPHALY SYNDROME; [123150] JACKSON-WEISS SYNDROME; [149730] LACRIMO-AURICULO-DENTO-DIGITAL SYNDROME	Acrocephalosyndactyly type i: likely pathogenic,pathogenic; Adenocarcinoma of stomach: likely pathogenic,pathogenic,uncertain significance; Adenoid cystic carcinoma: likely pathogenic,uncertain significance; Antley-bixler syndrome without genital anomalies or disordered steroidogenesis: pathogenic; Bent bone dysplasia syndrome: likely pathogenic,pathogenic; Craniosynostosis, nonsyndromic unicoron…	HP:0003246:Prominent scrotal raphe; HP:0030042:Incomplete ossification of pubis; HP:0004450:Preauricular skin furrow; HP:0004487:Acrobrachycephaly; HP:0008111:Broad distal hallux; HP:0007343:Abnormal morphology of the limbic system; HP:0009603:Deviation of the thumb; HP:0011223:Metopic depression; HP:0004439:Craniofacial dysostosis; HP:0040166:Abnormality of the periosteum; HP:0009951:Partial dup…	Palifermin; Thalidomide; Heparin; Sucrosofate; 3-[4-(1-formylpiperazin-4-yl)-benzylidenyl]-2-indolinone; 4-[4-(1-Amino-1-Methylethyl)Phenyl]-5-Chloro-N-[4-(2-Morpholin-4-Ylethyl)Phenyl]Pyrimidin-2-Amine; Regorafenib; Ponatinib; Lenvatinib; Nintedanib; Foreskin fibroblast (neonatal); Foreskin keratinocyte (neonatal); Fostamatinib; Erdafitinib; Pemigatinib; Selpercatinib	Abnormal morphology of the limbic system; Abnormality of the periosteum; Abnormality of the zygomatic bone; Acrobrachycephaly; Bent bone dysplasia; Broad distal hallux; CRANIOSYNOSTOSIS, NONCLASSIFIABLE AUTOSOMAL DOMINANT; CRANIOSYNOSTOSIS, NONSYNDROMIC UNICORONAL; Cervical Keratinizing Squamous Cell Carcinoma; Cervical Mesonephric Adenocarcinoma; Deviation of the thumb; Estrogen Receptor Status …	469	617	[{"UniProt":"D2CGD1","EnsemblGene":["ENSG00000066468"],"EnsemblTrans":[["ENST00000613048","ENSP00000484154",""]],"RefSeq":[["NM_023029","NP_075418","REVIEWED"]],"UCSC":["uc057wkv.1"],"SwissProt":["D2CGD1_HUMAN"]},{"UniProt":"S4R381","EnsemblGene":["ENSG00000066468"],"EnsemblTrans":[["ENST00000478859","ENSP00000474011",""]],"RefSeq":[["NM_001320654","NP_001307583","REVIEWED"]],"UCSC":["uc057wkx.1"…		Distribution: Detected in many; Specificity: Tissue enhanced	antibody: Airway and squamous epithelia showed strong cytoplasm staining. Leydig cells of testis and glandular cells of epidydimis showed strong cytoplasmic positivity with a granular pattern. Prostate and salivary gland showed positivity in basal cells. Normal cells in general displayed weak to moderate cytoplasmic staining.; General cytoplasmic expression.	Antibody: Skin cancers as well as several cases of cervical, lung, urothelial and liver cancers displayed moderate to strong immunoreactivity. Remaining cancer tissues were in general negative.	(M276)PID FGF PATHWAY	(ko05230)Central carbon metabolism in cancer; (hsa05230)Central carbon metabolism in cancer; (hsa01521)EGFR tyrosine kinase inhibitor resistance
Oncogene	AKT1	207	AKT|PKB|PKB-ALPHA|PRKBA|RAC|RAC-ALPHA	AKT serine/threonine kinase 1	This gene encodes one of the three members of the human AKT serine-threonine protein kinase family which are often referred to as protein kinase B alpha, beta, and gamma. These highly similar AKT proteins all have an N-terminal pleckstrin homology domain, a serine/threonine-specific kinase domain and a C-terminal regulatory domain. These proteins are phosphorylated by phosphoinositide 3-kinase (P…	chr14:104795748-104769349	GO:0100002 negative regulation of protein kinase activity by protein phosphorylation;GO:1990418 response to insulin-like growth factor stimulus;GO:0010748 negative regulation of plasma membrane long-chain fatty acid transport	[GO:0003674] molecular_function; [GO:0043167] ion binding; [GO:0008150] biological_process; [GO:0006464] cellular protein modification process; [GO:0016301] kinase activity; [GO:0007165] signal transduction; [GO:0007049] cell cycle; [GO:0000278] mitotic cell cycle; [GO:0006810] transport; [GO:0055085] transmembrane transport; [GO:0034641] cellular nitrogen compound metabolic process; [GO:0009058]…	GO:0036064 ciliary basal body;GO:0005819 spindle;GO:0005911 cell-cell junction	GO:0030235 nitric-oxide synthase regulator activity;GO:0032794 GTPase activating protein binding;GO:0043325 phosphatidylinositol-3,4-bisphosphate binding	AGC Ser/Thr protein kinase family	Predicted intracellular proteins; Disease related genes; Cancer-related genes:Candidate cancer biomarkers; Cancer-related genes:Mutational cancer driver genes; Kinases:AGC Ser/Thr protein kinases; Enzymes; Potential drug targets; ENZYME proteins:Transferases; RAS pathway related proteins; Cancer-related genes:Mutated cancer genes	[IPR000719] Protein kinase domain; [IPR000961] AGC-kinase, C-terminal; [IPR001849] Pleckstrin homology domain; [IPR008271] Serine/threonine-protein kinase, active site; [IPR011009] Protein kinase-like domain superfamily; [IPR011993] PH-like domain superfamily; [IPR017441] Protein kinase, ATP binding site; [IPR017892] Protein kinase, C-terminal; [IPR034676] Protein kinase B alpha, catalytic domain…	Nucleoplasm (reliability']); Additional: Microtubules								MP:0005370 liver/biliary system phenotype; MP:0005385 cardiovascular system phenotype; MP:0010768 mortality/aging; MP:0005369 muscle phenotype; MP:0005376 homeostasis/metabolism phenotype; MP:0005384 cellular phenotype; MP:0005378 growth/size/body region phenotype; MP:0005386 behavior/neurological phenotype; MP:0005381 digestive/alimentary phenotype; MP:0005387 immune system phenotype; MP:0002006…	[ORPHA:201] COWDEN SYNDROME; [ORPHA:744] Proteus syndrome	OMIM ID:164730 Akt serine/threonine kinase 1	Proteus syndrome; Cutaneous melanoma; Cowden syndrome 6		Carcinoma, Endometrioid;Endometrial Neoplasms	[176920] Proteus syndrome	Adenocarcinoma of prostate: likely pathogenic,pathogenic; Adenocarcinoma of stomach: likely pathogenic,pathogenic; Breast adenocarcinoma: likely pathogenic,pathogenic; Cowden syndrome 6: pathogenic; Carcinoma of colon: likely pathogenic,pathogenic; Clinvar: phenotype not specified: likely pathogenic; Cutaneous melanoma: likely pathogenic; Endometrial endometrioid adenocarcinoma, variant with squa…	HP:0004472:Mandibular hyperostosis; HP:0007403:Hypertrophy of skin of soles; HP:0010516:Thymus hyperplasia; HP:0100521:Neoplasm of the thymus; HP:0010816:Epidermal nevus; HP:0007483:Depigmentation/hyperpigmentation of skin; HP:0004418:Thrombophlebitis; HP:0012871:Varicocele; HP:0005465:Facial hyperostosis; HP:0100730:Bronchogenic cyst; HP:0004481:Progressive macrocephaly; HP:0009594:Retinal hamar…	ATP; Arsenic trioxide; Genistein; Inositol 1,3,4,5-Tetrakisphosphate; Resveratrol; Archexin; Enzastaurin; Perifosine; N-[2-(5-methyl-4H-1,2,4-triazol-3-yl)phenyl]-7H-pyrrolo[2,3-d]pyrimidin-4-amine; 5-(5-chloro-7H-pyrrolo[2,3-d]pyrimidin-4-yl)-4,5,6,7-tetrahydro-1H-imidazo[4,5-c]pyridine	COWDEN SYNDROME 6; Collagen nevus of skin; Dental cyst; Hypertrophy of skin of soles; Mandibular hyperostosis; Central odontogenic fibroma; Glandular papilloma; Infected cyst; Roux-en-y Anastomosis Site; SCHIZOPHRENIA 8 (disorder); Sialadenoma papilliferum; Depigmentation/hyperpigmentation of skin; Feline Lymphoma; Gynandroblastoma; Intraductal papilloma of breast; Salivary Gland Epithelial Myoep…	2778	3250	[{"UniProt":"P31749","EnsemblGene":["ENSG00000142208"],"RefSeq":[["XM_005267401","XP_005267458"]],"SwissProt":["AKT1_HUMAN"]},{"UniProt":"B0LPE5","RefSeq":[["NM_001014431","NP_001014431","REVIEWED"],["NM_001014432","NP_001014432","REVIEWED"],["NM_005163","NP_005154","REVIEWED"],["XM_005267401","XP_005267458"]],"SwissProt":["B0LPE5_HUMAN"]},{"UniProt":"B3KVH4","RefSeq":[["NM_005163","NP_005154","R…		Distribution: Detected in all; Specificity: Low tissue specificity	Ubiquitous nuclear expression.; antibody: Most normal cells showed moderate to strong nuclear positivity.	Antibody: Most malignancies cells showed moderate to strong nuclear positivity.	(M12771)SA PTEN PATHWAY; (M18895)SA TRKA RECEPTOR; (M184)PID ECADHERIN KERATINOCYTE PATHWAY	(ko04973)Carbohydrate digestion and absorption; (ko05213)Endometrial cancer; (hsa04973)Carbohydrate digestion and absorption	(hsa)PI3K-Akt signaling; (M00676)PI3K-Akt signaling		(M5908)HALLMARK ANDROGEN RESPONSE; (M5923)HALLMARK PI3K AKT MTOR SIGNALING; (M5950)HALLMARK ALLOGRAFT REJECTION	(M22029)BIOCARTA PLC PATHWAY; (M5415)BIOCARTA IL4 PATHWAY; (M16811)BIOCARTA ERK5 PATHWAY
Oncogene	CSF1R	1436	BANDDOS|C-FMS|CD115|CSF-1R|CSFR|FIM2|FMS|HDLS|M-CSF-R	colony stimulating factor 1 receptor	The protein encoded by this gene is the receptor for colony stimulating factor 1, a cytokine which controls the production, differentiation, and function of macrophages. This receptor mediates most if not all of the biological effects of this cytokine. Ligand binding activates the receptor kinase through a process of oligomerization and transphosphorylation. The encoded protein is a tyrosine kina…	chr5:150113365-150053295	GO:0038145 macrophage colony-stimulating factor signaling pathway;GO:0061518 microglial cell proliferation;GO:0120041 positive regulation of macrophage proliferation	[GO:0005575] cellular_component; [GO:0003674] molecular_function; [GO:0008150] biological_process; [GO:0006464] cellular protein modification process; [GO:0016301] kinase activity; [GO:0043167] ion binding; [GO:0007165] signal transduction; [GO:0006950] response to stress; [GO:0005622] intracellular; [GO:0043226] organelle; [GO:0005634] nucleus; [GO:0005654] nucleoplasm; [GO:0005886] plasma membr…	GO:1990682 CSF1-CSF1R complex;GO:0043235 receptor complex;GO:0009986 cell surface	GO:0005011 macrophage colony-stimulating factor receptor activity;GO:0004714 transmembrane receptor protein tyrosine kinase activity;GO:0019199 transmembrane receptor protein kinase activity	Tyr protein kinase family	CD markers; Predicted intracellular proteins; FDA approved drug targets:Small molecule drugs; Disease related genes; Cancer-related genes:Candidate cancer biomarkers; Enzymes; Kinases:Tyr protein kinases; ENZYME proteins:Transferases; RAS pathway related proteins	[IPR000719] Protein kinase domain; [IPR001245] Serine-threonine/tyrosine-protein kinase, catalytic domain; [IPR001824] Tyrosine-protein kinase, receptor class III, conserved site; [IPR003598] Immunoglobulin subtype 2; [IPR003599] Immunoglobulin subtype; [IPR007110] Immunoglobulin-like domain; [IPR008266] Tyrosine-protein kinase, active site; [IPR011009] Protein kinase-like domain superfamily; [IP…	Plasma membrane;Vesicles (reliability'])			yes	yes	yes		yes	MP:0010768 mortality/aging; MP:0005376 homeostasis/metabolism phenotype; MP:0005384 cellular phenotype; MP:0005378 growth/size/body region phenotype; MP:0005386 behavior/neurological phenotype; MP:0005387 immune system phenotype; MP:0005389 reproductive system phenotype; MP:0003631 nervous system phenotype; MP:0005377 hearing/vestibular/ear phenotype; MP:0005371 limbs/digits/tail phenotype; MP:00…	[ORPHA:313808] Hereditary diffuse leukoencephalopathy with axonal spheroids and pigmented glia; [ORPHA:556985] Early-onset calcifying leukoencephalopathy-skeletal dysplasia	OMIM ID:164770 Colony-stimulating factor 1 receptor	Frontotemporal dementia; BRAIN ABNORMALITIES, NEURODEGENERATION, AND DYSOSTEOSCLEROSIS; Alzheimer disease; Hereditary diffuse leukoencephalopathy with spheroids; Inborn genetic diseases; Hematologic neoplasm; Neoplasm; Myeloproliferative disorder	Arterial Pressure;Platelet Function Tests		[618476] BRAIN ABNORMALITIES NEURODEGENERATION AND DYSOSTEOSCLEROSIS	Clinvar: phenotype not specified: likely pathogenic,pathogenic; Hematologic neoplasm: likely pathogenic; Hereditary diffuse leukoencephalopathy with spheroids: likely pathogenic,pathogenic; Inborn genetic diseases: pathogenic; Myeloproliferative disorder: likely pathogenic; Neoplasm: likely pathogenic	HP:0007165:Periventricular heterotopia; HP:0000727:Frontal lobe dementia; HP:0011002:Osteopetrosis; HP:0002362:Shuffling gait; HP:0007305:CNS demyelination; HP:0002529:Neuronal loss in central nervous system; HP:0003678:Rapidly progressive; HP:0002518:Abnormality of the periventricular white matter; HP:0002300:Mutism; HP:0003016:Metaphyseal widening; HP:0002500:Abnormality of the cerebral white m…	Imatinib; Sunitinib; ABT-869; 5-CYANO-FURAN-2-CARBOXYLIC ACID [5-HYDROXYMETHYL-2-(4-METHYL-PIPERIDIN-1-YL)-PHENYL]-AMIDE; 6-CHLORO-3-(3-METHYLISOXAZOL-5-YL)-4-PHENYLQUINOLIN-2(1H)-ONE; Fostamatinib; Erdafitinib; Pexidartinib	Vasculitis, Central Nervous System; Synovioma, benign; frontal dementia; Breast Sclerosing Adenosis; Cutaneous/peripheral T-cell lymphoma; Fibrosing adenosis; Lymphoblastic B-cell lymphoma; Muscle tenderness; Skeletal muscle tender; Dysosteosclerosis; Hyperesthesia; Hereditary Hyperexplexia; POLYCYSTIC LIPOMEMBRANOUS OSTEODYSPLASIA WITH SCLEROSING LEUKOENCEPHALOPATHY 1; Bone marrow myeloid dyspla…	140	220	[{"UniProt":"P07333","EnsemblGene":["ENSG00000182578"],"SwissProt":["CSF1R_HUMAN"]}]	bone_marrow	Distribution: Detected in all; Specificity: Tissue enhanced	Cytoplasmic expression at variable levels in several different cell types.; antibody: Most normal tissues displayed weak to moderate cytoplasmic staining. Strong positivity was observed in adrenal cortex, thyroid, renal tubules, gall bladder, cervix and bronchus.	Antibody: Several cases of ovarian, thyroid, renal, gastric and pancreatic cancers showed moderate to strong cytoplasmic as well as nuclear positivity. Remaining cancer tissues were weakly stained.	(M91)PID TCPTP PATHWAY; (M50)PID PTP1B PATHWAY; (M160)PID AVB3 INTEGRIN PATHWAY	(hsa05221)Acute myeloid leukemia; (ko04640)Hematopoietic cell lineage; (hsa04640)Hematopoietic cell lineage				(M16973)BIOCARTA CBL PATHWAY; (M14449)BIOCARTA ETS PATHWAY
Oncogene	KLF4	9314	EZF|GKLF	Kruppel like factor 4	This gene encodes a protein that belongs to the Kruppel family of transcription factors. The encoded zinc finger protein is required for normal development of the barrier function of skin. The encoded protein is thought to control the G1-to-S transition of the cell cycle following DNA damage by mediating the tumor suppressor gene p53. Mice lacking this gene have a normal appearance but lose weigh…	chr9:107489769-107484852	GO:1904998 negative regulation of leukocyte adhesion to arterial endothelial cell;GO:0014740 negative regulation of muscle hyperplasia;GO:0007500 mesodermal cell fate determination	[GO:0003674] molecular_function; [GO:0008150] biological_process; [GO:0048856] anatomical structure development; [GO:0040011] locomotion; [GO:0048646] anatomical structure formation involved in morphogenesis; [GO:0048870] cell motility; [GO:0006950] response to stress; [GO:0034641] cellular nitrogen compound metabolic process; [GO:0009058] biosynthetic process; [GO:0007155] cell adhesion; [GO:000…	GO:0005719 nuclear euchromatin;GO:0000791 euchromatin;GO:0005667 transcription factor complex	GO:0001010 RNA polymerase II sequence-specific DNA-binding transcription factor recruiting activity;GO:0061629 RNA polymerase II sequence-specific DNA-binding transcription factor binding;GO:0035014 phosphatidylinositol 3-kinase regulator activity		Cancer-related genes:Candidate cancer biomarkers; Transcription factors:Zinc-coordinating DNA-binding domains; Predicted intracellular proteins	[IPR013087] Zinc finger C2H2-type; [IPR036236] Zinc finger C2H2 superfamily	Nucleoplasm (reliability'])								MP:0010768 mortality/aging; MP:0005376 homeostasis/metabolism phenotype; MP:0005384 cellular phenotype; MP:0005378 growth/size/body region phenotype; MP:0005386 behavior/neurological phenotype; MP:0005381 digestive/alimentary phenotype; MP:0005387 immune system phenotype; MP:0002006 neoplasm; MP:0005389 reproductive system phenotype; MP:0005391 vision/eye phenotype; MP:0005397 hematopoietic syste…		OMIM ID:602253 Kruppel-like factor 4		Electrocardiography;Interleukin-6;Myocardial Infarction;Platelet Function Tests	Bone Density;Breast Neoplasms;hemoglobin A1c protein, human					Echinococcus granulosus infection; Lymphedema distichiasis syndrome; Intratubular malignant germ cells; Secretory meningioma; Corneal fibrosis; Nephrotoxic serum nephritis; Rapidly progressive glomerulonephritis; Cervix Intraepithelial Neoplasia Grade 3 AJCC v7; Cystic Echinocccosis; Maladaptive behavior associated with physical illness; Cyclical vomiting syndrome (disorder); Stickler syndrome, t…	380	419	[{"UniProt":"O43474","EnsemblGene":["ENSG00000136826"],"SwissProt":["KLF4_HUMAN"]}]		Distribution: Detected in all; Specificity: Tissue enhanced	Nuclear expression in several different tissues, highly abundant in squamous epithelium.; antibody: Squamous epithelia, glandular cells in gastrointestinal tract, respiratory epithelium, trophoblasts and a subset of cells in testis and bone marrow showed strong distinct nuclear positivity. Remaining normal cells were negative.	Antibody: Selected cases of cervical, lung, squamous carcinomas of skin, testis, urothelial, gastric, pancreatic and head and neck cancers showed strong nuclear positivity. Remaining cancers were negative.	(M223)PID BETA CATENIN NUC PATHWAY	(ko04550)Signaling pathways regulating pluripotency of stem cells; (hsa04550)Signaling pathways regulating pluripotency of stem cells			(M5890)HALLMARK TNFA SIGNALING VIA NFKB; (M5906)HALLMARK ESTROGEN RESPONSE EARLY; (M5907)HALLMARK ESTROGEN RESPONSE LATE
Oncogene	PTTG1	9232	EAP1|HPTTG|PTTG|TUTR1	PTTG1 regulator of sister chromatid separation, securin	The encoded protein is a homolog of yeast securin proteins, which prevent separins from promoting sister chromatid separation. It is an anaphase-promoting complex (APC) substrate that associates with a separin until activation of the APC. The gene product has transforming activity in vitro and tumorigenic activity in vivo, and the gene is highly expressed in various tumors. The gene product conta…	chr5:160421855-160428744	GO:2000816 negative regulation of mitotic sister chromatid separation;GO:1905819 negative regulation of chromosome separation;GO:0033048 negative regulation of mitotic sister chromatid segregation	[GO:0005575] cellular_component; [GO:0005622] intracellular; [GO:0043226] organelle; [GO:0005634] nucleus; [GO:0005737] cytoplasm; [GO:0008150] biological_process; [GO:0051276] chromosome organization; [GO:0007049] cell cycle; [GO:0051301] cell division; [GO:0006950] response to stress; [GO:0034641] cellular nitrogen compound metabolic process; [GO:0006259] DNA metabolic process; [GO:0003674] mol…	GO:0005829 cytosol;GO:0005634 nucleus;GO:0044444 cytoplasmic part	GO:0004869 cysteine-type endopeptidase inhibitor activity;GO:0017124 SH3 domain binding;GO:0004866 endopeptidase inhibitor activity		Cancer-related genes:Candidate cancer biomarkers; Predicted intracellular proteins	[IPR006940] Securin sister-chromatid separation inhibitor	Cytosol (reliability']); Additional: Nucleoli						principal1		MP:0005367 renal/urinary system phenotype; MP:0005376 homeostasis/metabolism phenotype; MP:0005384 cellular phenotype; MP:0005378 growth/size/body region phenotype; MP:0005386 behavior/neurological phenotype; MP:0005387 immune system phenotype; MP:0005389 reproductive system phenotype; MP:0005390 skeleton phenotype; MP:0005397 hematopoietic system phenotype; MP:0005379 endocrine/exocrine gland ph…		OMIM ID:604147 Pituitary tumor-transforming gene 1		Iron;Platelet Count	Arthritis, Rheumatoid;Emotions;Insulin;Lupus Erythematosus, Systemic					Gastric dysplasia; C-cell hyperplasia of thyroid; Columnar Cell Hyperplasia of the Breast; Seborrheic keratosis; Perianal Squamous Intraepithelial Neoplasia; Teratozoospermia; Non-Functioning Pituitary Gland Neoplasm; Bowen's Disease; Growth Hormone-Secreting Pituitary Adenoma; Malignant neoplasm of adrenal cortex; FRAGILE X TREMOR/ATAXIA SYNDROME; POLYARTERITIS NODOSA, CHILDHOOD-ONSET; Polyarter…	187	263	[{"UniProt":"O95997","EnsemblGene":["ENSG00000164611"],"EnsemblTrans":[["ENST00000352433","ENSP00000344936","principal1"],["ENST00000393964","ENSP00000377536","principal1"],["ENST00000520452","ENSP00000430642","principal1"]],"RefSeq":[["NM_001282382","NP_001269311","REVIEWED"],["NM_001282383","NP_001269312","REVIEWED"],["NM_004219","NP_004210","REVIEWED"]],"SwissProt":["PTTG1_HUMAN"]},{"UniProt":…		Distribution: Detected in many; Specificity: Tissue enhanced	Cytoplasmic and nuclear expression in proliferating cells. Most abundant in a subset of spermatocytes in testis and germinal center cells.; antibody: Strong nuclear staining was observed in proliferative cells, e.g. basal crypt cells of the gastrointestinal tract, in cells of the seminiferous ducts and in germinal centers of lymph nodes and tonsils. Cells of the CNS and soft tissues were often ne…	Antibody: Strong nuclear staining was observed in a majority of cells in cases of colorectal cancers, lymphomas, gliomas, head neck cancers and endometrial cancers. Few, or no stained cells were seen in prostate and renal carcinomas.		(ko04114)Oocyte meiosis; (ko04110)Cell cycle; (hsa04114)Oocyte meiosis			(M5901)HALLMARK G2M CHECKPOINT; (M5925)HALLMARK E2F TARGETS
Oncogene	USP6	9098	HRP1|TRE17|TRE2|TRESMCR|Tre-2|USP6-short	ubiquitin specific peptidase 6		chr17:5116032-5175032	GO:0090630 activation of GTPase activity;GO:0016579 protein deubiquitination;GO:0070646 protein modification by small protein removal	[GO:0008150] biological_process; [GO:0009056] catabolic process; [GO:0003674] molecular_function; [GO:0008233] peptidase activity; [GO:0006464] cellular protein modification process; [GO:0005575] cellular_component; [GO:0005737] cytoplasm; [GO:0005622] intracellular; [GO:0005886] plasma membrane; [GO:0043226] organelle; [GO:0031410] cytoplasmic vesicle; [GO:0005768] endosome; [GO:0030234] enzyme …	GO:0055037 recycling endosome;GO:0000323 lytic vacuole;GO:0005764 lysosome	GO:0004197 cysteine-type endopeptidase activity;GO:0004843 thiol-dependent ubiquitin-specific protease activity;GO:0036459 thiol-dependent ubiquitinyl hydrolase activity		Predicted intracellular proteins; Disease related genes; Cancer-related genes; Peptidases:Cysteine-type peptidases; ENZYME proteins:Hydrolases; Enzymes; Potential drug targets	[IPR000195] Rab-GTPase-TBC domain; [IPR001394] Peptidase C19, ubiquitin carboxyl-terminal hydrolase; [IPR018200] Ubiquitin specific protease, conserved site; [IPR028889] Ubiquitin specific protease domain; [IPR035969] Rab-GTPase-TBC domain superfamily; [IPR038765] Papain-like cysteine peptidase superfamily	Vesicles (reliability'])									[ORPHA:477742] Nodular fasciitis	OMIM ID:604334 Ubiquitin-specific protease 6								Giant Cell Lesion of Small Bones; Cranial fasciitis; Fibroma of tendon sheath; Cellular fibroma; Digitorenocerebral Syndrome; Low grade myofibroblastic sarcoma; Benign bone neoplasm; Osteoid osteoma; Pseudotumor; Myositis Ossificans; Chondromatosis, Synovial; Synovial osteochondromatosis; Cherubism; Nodular fasciitis; Dermatofibrosarcoma; Recurrent Childhood Acute Lymphoblastic Leukemia; Giant Ce…	31	58	[{"UniProt":"P35125","EnsemblGene":["ENSG00000129204"],"SwissProt":["UBP6_HUMAN"]}]	testis	Distribution: Detected in some; Specificity: Group enriched			(M86)PID ARF6 PATHWAY
Oncogene	URI1	8725	C19orf2|NNX3|PPP1R19|RMP|URI	URI1 prefoldin like chaperone	This gene encodes member of the prefoldin family of molecular chaperones. The encoded protein functions as a scaffolding protein and plays roles in ubiquitination and transcription, in part though interactions with the RNA polymerase II subunit RPB5. This gene may play a role in multiple malignancies including ovarian cancer and hepatocellular carcinoma. Alternatively spliced transcript variants …	chr19:29923650-30016612	GO:0032515 negative regulation of phosphoprotein phosphatase activity;GO:0035308 negative regulation of protein dephosphorylation;GO:2001243 negative regulation of intrinsic apoptotic signaling pathway	[GO:0005575] cellular_component; [GO:0005622] intracellular; [GO:0043226] organelle; [GO:0005634] nucleus; [GO:0005737] cytoplasm; [GO:0005654] nucleoplasm; [GO:0005829] cytosol; [GO:0005739] mitochondrion; [GO:0003674] molecular_function; [GO:0008150] biological_process; [GO:0006464] cellular protein modification process; [GO:0030234] enzyme regulator activity; [GO:0034641] cellular nitrogen com…	GO:0030425 dendrite;GO:0097447 dendritic tree;GO:0036477 somatodendritic compartment	GO:0004864 protein phosphatase inhibitor activity;GO:0019212 phosphatase inhibitor activity;GO:0000993 RNA polymerase II complex binding		Predicted intracellular proteins	[IPR004127] Prefoldin alpha-like; [IPR009053] Prefoldin	Nucleoplasm (reliability']); Additional: Cytosol								MP:0005370 liver/biliary system phenotype; MP:0005385 cardiovascular system phenotype; MP:0010768 mortality/aging; MP:0005376 homeostasis/metabolism phenotype; MP:0005384 cellular phenotype; MP:0005387 immune system phenotype; MP:0002006 neoplasm		OMIM ID:603494 Prefoldin-like chaperone uri1		Body Weights and Measures;Diabetic Nephropathies;Stroke						Extensively Drug-Resistant Tuberculosis; Small Fiber Neuropathy; Pain Disorder; Enthesitis-Related Arthritis; Tuberculosis, Multidrug-Resistant; gliosarcoma; Early Rheumatoid Arthritis; Neoplasms, Experimental; Herpes NOS; Interstitial Cystitis; Bulbo-Spinal Atrophy, X-Linked; Leigh Disease; Carcinomatosis; Carcinoma, Spindle-Cell; Anaplastic carcinoma; Superficial ulcer; Gonorrhea; Undifferentia…	17	66	[{"UniProt":"O94763","EnsemblGene":["ENSG00000105176"],"SwissProt":["RMP_HUMAN"]}]		Distribution: Detected in all; Specificity: Low tissue specificity	antibody: Most normal tissues showed moderate to strong cytoplasmic positivity. Liver, adipose and muscle tissues were weakly stained or negative.; Cytoplasmic expression in most tissues.	Antibody: Most cancer tissues showed moderate to strong cytoplasmic positivity.
Oncogene	CBFB	865	PEBP2B	core-binding factor subunit beta	The protein encoded by this gene is the beta subunit of a heterodimeric core-binding transcription factor belonging to the PEBP2/CBF transcription factor family which master-regulates a host of genes specific to hematopoiesis (e.g., RUNX1) and osteogenesis (e.g., RUNX2). The beta subunit is a non-DNA binding regulatory subunit; it allosterically enhances DNA binding by alpha subunit as the comple…	chr16:67029149-67101058	GO:0043378 positive regulation of CD8-positive, alpha-beta T cell differentiation;GO:0043376 regulation of CD8-positive, alpha-beta T cell differentiation;GO:2001187 positive regulation of CD8-positive, alpha-beta T cell activation	[GO:0005575] cellular_component; [GO:0005622] intracellular; [GO:0043226] organelle; [GO:0005634] nucleus; [GO:0003674] molecular_function; [GO:0008150] biological_process; [GO:0034641] cellular nitrogen compound metabolic process; [GO:0009058] biosynthetic process; [GO:0003677] DNA binding; [GO:0005654] nucleoplasm; [GO:0030154] cell differentiation; [GO:0048856] anatomical structure development…	GO:0016513 core-binding factor complex;GO:0090575 RNA polymerase II transcription factor complex;GO:0044798 nuclear transcription factor complex	GO:0003713 transcription coactivator activity;GO:0003712 transcription coregulator activity;GO:0043565 sequence-specific DNA binding		Disease related genes; Cancer-related genes:Mutational cancer driver genes; Predicted intracellular proteins; Cancer-related genes:Mutated cancer genes	[IPR003417] Core-binding factor, beta subunit; [IPR036552] Core-binding factor, beta subunit superfamily	Cytosol;Nucleoplasm (reliability'])								MP:0005370 liver/biliary system phenotype; MP:0005385 cardiovascular system phenotype; MP:0010768 mortality/aging; MP:0005376 homeostasis/metabolism phenotype; MP:0005384 cellular phenotype; MP:0005378 growth/size/body region phenotype; MP:0005381 digestive/alimentary phenotype; MP:0005387 immune system phenotype; MP:0003631 nervous system phenotype; MP:0005391 vision/eye phenotype; MP:0005371 li…	[ORPHA:98829] Acute myeloid leukemia with abnormal bone marrow eosinophils inv16p13q22 or t16	OMIM ID:121360 Core-binding factor, beta subunit		Cholesterol, HDL				HP:0004808:Acute myeloid leukemia; HP:0001428:Somatic mutation; HP:0000006:Autosomal dominant inheritance		Sarcoma of mesentery; Acute myelomonocytic leukemia with abnormal eosinophils; Acute myeloid leukemia, inv(16)(p13q22); Myeloid leukemia associated with Down Syndrome; Heterotopic Ossification; Core binding factor acute myeloid leukemia; Preleukemia; Adult Acute Myelomonocytic Leukemia; Childhood Acute Myelomonocytic Leukemia; Granulocytic Sarcoma; Sarcoma, Myeloid; Lobular carcinoma in situ of b…	65	147	[{"UniProt":"Q13951","EnsemblGene":["ENSG00000067955"],"SwissProt":["PEBB_HUMAN"]},{"UniProt":"A0A024R6X2","RefSeq":[["NM_001755","NP_001746","REVIEWED"]],"SwissProt":["A0A024R6X2_HUMAN"]}]		Distribution: Detected in all; Specificity: Low tissue specificity	antibody: Moderate membranous staining was observed in gastrointestinal tract, gall bladder, pancreatic ducts and adrenal cortex. Weak to moderate cytoplasmic staining was observed in kidney, breast, respiratory and squamous epithelia. Remaining normal tissues were generally negative.; Estimation of protein expression could not be performed. View primary data.	Antibody: Moderate to strong luminal membranous positivity was observed in colorectal cancers. Several cases of pancreatic cancers along with a few cases of ovarian, gastric and liver cancers displayed weak to moderate membranous immunoreactivity. Remaining cancer tissues were mainly negative.	(M166)PID ATF2 PATHWAY; (M167)PID AP1 PATHWAY; (M2)PID SMAD2 3NUCLEAR PATHWAY
Oncogene	RUNX1T1	862	AML1-MTG8|AML1T1|CBFA2T1|CDR|ETO|MTG8|ZMYND2	RUNX1 partner transcriptional co-repressor 1	This gene encodes a member of the myeloid translocation gene family which interact with DNA-bound transcription factors and recruit a range of corepressors to facilitate transcriptional repression. The t(8;21)(q22;q22) translocation is one of the most frequent karyotypic abnormalities in acute myeloid leukemia. The translocation produces a chimeric gene made up of the 5'-region of the runt-relate…	chr8:92103451-91954967	GO:0045599 negative regulation of fat cell differentiation;GO:0045598 regulation of fat cell differentiation;GO:0045444 fat cell differentiation	[GO:0008150] biological_process; [GO:0034641] cellular nitrogen compound metabolic process; [GO:0009058] biosynthetic process; [GO:0003674] molecular_function; [GO:0005575] cellular_component; [GO:0005622] intracellular; [GO:0043226] organelle; [GO:0005634] nucleus; [GO:0043167] ion binding; [GO:0005654] nucleoplasm; [GO:0003677] DNA binding; [GO:0030154] cell differentiation	GO:0016363 nuclear matrix;GO:0034399 nuclear periphery;GO:0005654 nucleoplasm	GO:0003714 transcription corepressor activity;GO:0003712 transcription coregulator activity;GO:0140110 transcription regulator activity		Predicted intracellular proteins; Disease related genes; Cancer-related genes	[IPR002893] Zinc finger, MYND-type; [IPR003894] TAFH/NHR1; [IPR013289] CBFA2T family; [IPR013290] Protein CBFA2T1; [IPR014896] NHR2-like; [IPR037249] TAFH/NHR1 domain superfamily	Nucleoplasm (reliability'])						alternative2		MP:0005385 cardiovascular system phenotype; MP:0010768 mortality/aging; MP:0005378 growth/size/body region phenotype; MP:0005386 behavior/neurological phenotype; MP:0005381 digestive/alimentary phenotype; MP:0005387 immune system phenotype; MP:0005389 reproductive system phenotype; MP:0005397 hematopoietic system phenotype; MP:0010771 integument phenotype	[ORPHA:102724] Acute myeloid leukemia with t8	OMIM ID:133435 Runt-related transcription factor 1, translocated to, 1	NK-cell enteropathy; Short stature	Erythrocyte Count;Neuropsychological Tests;Platelet Function Tests;Triglycerides	Affective Disorders, Psychotic;Attention Deficit Disorder with Hyperactivity					Acute myeloid leukemia, t(8;21) (q22;q22); Multiple cranial nerve palsy; Narrow angle; Acute myeloblastic leukemia with t(8;21); Myeloid leukemia associated with Down Syndrome; Trisomy 15; Leukemic Infiltration; Therapy-related acute myeloid leukemia and myelodysplastic syndrome; Endocrine Gland Neoplasms; Mild dementia; Transformation to acute myeloid leukaemia; Core binding factor acute myeloid…	114	175	[{"UniProt":"A0A087WWT6","EnsemblGene":["ENSG00000079102"],"EnsemblTrans":[["ENST00000615601","ENSP00000480500","alternative2"]],"RefSeq":[["NM_001198633","NP_001185562","REVIEWED"]],"UCSC":["uc022axu.1"],"SwissProt":["A0A087WWT6_HUMAN"]},{"UniProt":"A0A0A0MSU1","EnsemblGene":["ENSG00000079102"],"EnsemblTrans":[["ENST00000436581","ENSP00000402257","alternative2"]],"RefSeq":[["NM_001198679","NP_00…	heart	Distribution: Detected in many; Specificity: Tissue enriched	Low nucleolar expression in most tissues.			(ko05221)Acute myeloid leukemia; (hsa05221)Acute myeloid leukemia; (ko05202)Transcriptional misregulation in cancer
Oncogene	RUNX1	861	AML1|AML1-EVI-1|AMLCR1|CBF2alpha|CBFA2|EVI-1|PEBP2aB|PEBP2alpha	RUNX family transcription factor 1	Core binding factor (CBF) is a heterodimeric transcription factor that binds to the core element of many enhancers and promoters. The protein encoded by this gene represents the alpha subunit of CBF and is thought to be involved in the development of normal hematopoiesis. Chromosomal translocations involving this gene are well-documented and have been associated with several types of leukemia. Th…	chr21:35049334-34787801	GO:0043378 positive regulation of CD8-positive, alpha-beta T cell differentiation;GO:0043376 regulation of CD8-positive, alpha-beta T cell differentiation;GO:0030854 positive regulation of granulocyte differentiation	[GO:0003674] molecular_function; [GO:0003677] DNA binding; [GO:0008150] biological_process; [GO:0034641] cellular nitrogen compound metabolic process; [GO:0009058] biosynthetic process; [GO:0005575] cellular_component; [GO:0005622] intracellular; [GO:0043226] organelle; [GO:0005634] nucleus; [GO:0043167] ion binding; [GO:0003700] DNA-binding transcription factor activity; [GO:0005654] nucleoplasm…	GO:0016513 core-binding factor complex;GO:0090575 RNA polymerase II transcription factor complex;GO:0044798 nuclear transcription factor complex	GO:0001228 DNA-binding transcription activator activity, RNA polymerase II-specific;GO:0000978 RNA polymerase II proximal promoter sequence-specific DNA binding;GO:0000987 proximal promoter sequence-specific DNA binding		Predicted intracellular proteins; Disease related genes; Transcription factors:Immunoglobulin fold; Cancer-related genes:Mutational cancer driver genes; Cancer-related genes:Mutated cancer genes	[IPR000040] Acute myeloid leukemia 1 protein (AML1)/Runt; [IPR008967] p53-like transcription factor, DNA-binding; [IPR012346] p53/RUNT-type transcription factor, DNA-binding domain superfamily; [IPR013524] Runt domain; [IPR013711] Runx, C-terminal domain; [IPR016554] Runt-related transcription factor RUNX; [IPR027384] Runx, central domain superfamily	Nucleoplasm (reliability']); Additional: Vesicles					yes			MP:0005370 liver/biliary system phenotype; MP:0005385 cardiovascular system phenotype; MP:0010768 mortality/aging; MP:0005376 homeostasis/metabolism phenotype; MP:0005384 cellular phenotype; MP:0005378 growth/size/body region phenotype; MP:0005386 behavior/neurological phenotype; MP:0005387 immune system phenotype; MP:0002006 neoplasm; MP:0003631 nervous system phenotype; MP:0005390 skeleton phen…	[ORPHA:102724] Acute myeloid leukemia with t8; [ORPHA:521] Chronic myeloid leukemia; [ORPHA:71290] Familial platelet disorder with associated myeloid malignancy; [ORPHA:248340] Isolated delta-storage pool disease; [ORPHA:99860] Precursor B-cell acute lymphoblastic leukemia	OMIM ID:151385 Runt-related transcription factor 1	Familial platelet disorder with associated myeloid malignancy; Thrombocytopenia; Storage pool disease of platelets; Pancytopenia; Hereditary thrombocytopenia and hematologic cancer predisposition syndrome; not specified; Acute myeloid leukemia	Bilirubin;Stroke;Vitamin D	Alopecia;Eicosapentaenoic Acid;Esophageal Neoplasms;Esophageal Squamous Cell Carcinoma;Pre-Eclampsia;S-(3-hydroxypropyl)cysteine N-acetate;Smoking;Vaccine Potency		Acute myeloid leukemia: likely pathogenic; Clinvar: phenotype not specified: likely pathogenic,pathogenic,uncertain significance; Familial platelet disorder with associated myeloid malignancy: likely pathogenic,pathogenic,uncertain significance; Leukemia, acute myeloid, m0 subtype: pathogenic,uncertain significance; Transient myeloproliferative disorder of down syndrome: pathogenic,uncertain sign…	HP:0012527:Abnormal alpha granule content; HP:0012529:Abnormal dense granule content; HP:0004845:Acute monocytic leukemia; HP:0001912:Abnormal basophil morphology; HP:0005547:Myeloproliferative disorder; HP:0003540:Impaired platelet aggregation; HP:0004396:Poor appetite; HP:0001894:Thrombocytosis; HP:0003006:Neuroblastoma; HP:0004808:Acute myeloid leukemia; HP:0003010:Prolonged bleeding time; HP:…		Abnormal alpha granule content; Abnormal dense granule content; Hypercellular bone marrow; recurrent childhood acute myeloid leukemia; Acute lymphoblastic leukemia, in relapse; Multiple cranial nerve palsy; Abnormal basophil morphology; Autoimmune lung disease; Inherited platelet disorder; Acute myeloblastic leukemia with t(8;21); Acute myeloid leukemia, inv(16)(p13q22); Alpha-Thalassemia Myelody…	600	733	[{"UniProt":"Q01196","EnsemblGene":["ENSG00000159216"],"SwissProt":["RUNX1_HUMAN"]}]		Distribution: Detected in all; Specificity: Tissue enhanced	Nuclear expression in several tissues.; antibody: Moderate nuclear positivity was observed in breast, urothelium, glandular cells of cervix, respiratory epithelium, small intestine, lymphoid and inflammatory cells. Parietal cells of stomach showed moderate cytoplasmic staining. Remaining normal tissues were in general weakly stained or negative.	Antibody: Malignant cells generally showed weak to moderate nuclear staining, additional cytoplasmic positivity was observed in a few cases. Most cases of malignant gliomas, testicular, renal and ovarian cancers were negative.	(M236)PID DELTA NP63 PATHWAY; (M2)PID SMAD2 3NUCLEAR PATHWAY	(ko05221)Acute myeloid leukemia; (hsa05221)Acute myeloid leukemia; (ko05220)Chronic myeloid leukemia			(M5942)HALLMARK UV RESPONSE DN
Oncogene	CARD11	84433	BENTA|BIMP3|CARMA1|IMD11|IMD11A|PPBL	caspase recruitment domain family member 11	The protein encoded by this gene belongs to the membrane-associated guanylate kinase (MAGUK) family, a class of proteins that functions as molecular scaffolds for the assembly of multiprotein complexes at specialized regions of the plasma membrane. This protein is also a member of the CARD protein family, which is defined by carrying a characteristic caspase-associated recruitment domain (CARD). …	chr7:3043867-2906142	GO:0046710 GDP metabolic process;GO:0050862 positive regulation of T cell receptor signaling pathway;GO:0046037 GMP metabolic process	[GO:0003674] molecular_function; [GO:0008150] biological_process; [GO:0008219] cell death; [GO:0034641] cellular nitrogen compound metabolic process; [GO:0009058] biosynthetic process; [GO:0005575] cellular_component; [GO:0005737] cytoplasm; [GO:0005622] intracellular; [GO:0005886] plasma membrane; [GO:0002376] immune system process; [GO:0007165] signal transduction; [GO:0030154] cell differentia…	GO:0032449 CBM complex;GO:0001772 immunological synapse;GO:0045121 membrane raft	GO:0004385 guanylate kinase activity;GO:0050700 CARD domain binding;GO:0050145 nucleoside monophosphate kinase activity		Disease related genes; Predicted intracellular proteins; Cancer-related genes:Mutated cancer genes	[IPR001315] CARD domain; [IPR011029] Death-like domain superfamily; [IPR027417] P-loop containing nucleoside triphosphate hydrolase; [IPR033538] Caspase recruitment domain-containing protein 11; [IPR036034] PDZ superfamily; [IPR042141] CARD11, CARD domain; [IPR001478] PDZ domain							principal1		MP:0005376 homeostasis/metabolism phenotype; MP:0005384 cellular phenotype; MP:0005378 growth/size/body region phenotype; MP:0005387 immune system phenotype; MP:0005397 hematopoietic system phenotype; MP:0010771 integument phenotype; MP:0005388 respiratory system phenotype	[ORPHA:464336] BENTA disease; [ORPHA:300324] Persistent polyclonal B-cell lymphocytosis; [ORPHA:357237] Severe combined immunodeficiency due to CARD11 deficiency	OMIM ID:607210 Caspase recruitment domain-containing protein 11	Immunodeficiency 11; B-cell expansion with NFKB and T-cell anergy; IMMUNODEFICIENCY 11B WITH ATOPIC DERMATITIS	Blood Pressure;Fibrinogen;Platelet Function Tests;alpha-carotene	Bronchodilator Agents;Dermatitis, Atopic;Lung Volume Measurements;Neuroticism;Rest;White Matter		B-cell expansion with nfkb and t-cell anergy: pathogenic; Clinvar: phenotype not specified: likely pathogenic,pathogenic; Immunodeficiency 11: pathogenic; Immunodeficiency 11b with atopic dermatitis: likely pathogenic,pathogenic	HP:0001047:Atopic dermatitis; HP:0100827:Lymphocytosis; HP:0002850:Decreased circulating total IgM; HP:0001880:Eosinophilia; HP:0004313:Decreased antibody level in blood; HP:0002090:Pneumonia; HP:0002099:Asthma; HP:0002719:Recurrent infections; HP:0002721:Immunodeficiency; HP:0002205:Recurrent respiratory infections; HP:0001744:Splenomegaly; HP:0003593:Infantile onset; HP:0000006:Autosomal domina…		IMMUNODEFICIENCY 11; IMMUNODEFICIENCY 11B WITH ATOPIC DERMATITIS; Autosomal recessive SCID; B-CELL EXPANSION WITH NFKB AND T-CELL ANERGY; Extranodal marginal zone B-cell lymphomas (low grade B-cell); Persistent Polyclonal B-Cell Lymphocytosis; Diffuse Large B-Cell Lymphoma Germinal Center B-Cell Type; Granulomatous Slack Skin; Omenn Syndrome; Eczema, Infantile; Activated B-cell type diffuse large…	77	118	[{"UniProt":"Q9BXL7","EnsemblGene":["ENSG00000198286"],"EnsemblTrans":[["ENST00000396946","ENSP00000380150","principal1"]],"RefSeq":[["NM_001324281","NP_001311210","REVIEWED"],["NM_032415","NP_115791","REVIEWED"],["XM_011515586","XP_011513888"]],"UCSC":["uc003smv.5"],"SwissProt":["CAR11_HUMAN"]},{"UniProt":"A0A024R854","RefSeq":[["NM_001324281","NP_001311210","REVIEWED"],["NM_032415","NP_115791",…	lymph_node	Distribution: Detected in many; Specificity: Tissue enhanced	Cytoplasmic expression in subsets of lymphoid cells in several tissues.; antibody: Most normal tissues showed weak to moderate cytoplasmic and/or nuclear positivity. Bone marrow, glial cells, islets of Langerhans and soft tissues were negative.	Antibody: Cancer tissues showed weak to moderate cytoplasmic and/or nuclear positivity. Several cases of carcinoids and prostate cancers were negative.	(M88)PID CD8 TCR PATHWAY; (M10)PID BCR 5PATHWAY; (M34)PID TCR PATHWAY	(ko04662)B cell receptor signaling pathway; (hsa04662)B cell receptor signaling pathway; (ko04064)NF-kappa B signaling pathway
Oncogene	GFI1B	8328	BDPLT17|ZNF163B	growth factor independent 1B transcriptional repressor	This gene encodes a zinc-finger containing transcriptional regulator that is primarily expressed in cells of hematopoietic lineage. The encoded protein complexes with numerous other transcriptional regulatory proteins including GATA-1, runt-related transcription factor 1 and histone deacetylases to control expression of genes involved in the development and maturation of erythrocytes and megakary…	chr9:132945531-132991697	GO:2000134 negative regulation of G1/S transition of mitotic cell cycle;GO:1902807 negative regulation of cell cycle G1/S phase transition;GO:2000045 regulation of G1/S transition of mitotic cell cycle	[GO:0008150] biological_process; [GO:0034641] cellular nitrogen compound metabolic process; [GO:0009058] biosynthetic process; [GO:0003674] molecular_function; [GO:0005575] cellular_component; [GO:0005622] intracellular; [GO:0043226] organelle; [GO:0005634] nucleus; [GO:0043167] ion binding; [GO:0005654] nucleoplasm; [GO:0005886] plasma membrane; [GO:0003677] DNA binding; [GO:0051276] chromosome …	GO:0016363 nuclear matrix;GO:0034399 nuclear periphery;GO:0005667 transcription factor complex	GO:0001085 RNA polymerase II transcription factor binding;GO:0001228 DNA-binding transcription activator activity, RNA polymerase II-specific;GO:0008134 transcription factor binding		Disease related genes; Transcription factors:Zinc-coordinating DNA-binding domains; Predicted intracellular proteins	[IPR013087] Zinc finger C2H2-type; [IPR036236] Zinc finger C2H2 superfamily; [IPR037044] Zinc finger protein Gfi-1b	Nucleoplasm (reliability'])						alternative2		MP:0005385 cardiovascular system phenotype; MP:0010768 mortality/aging; MP:0005376 homeostasis/metabolism phenotype; MP:0005384 cellular phenotype; MP:0005387 immune system phenotype; MP:0005397 hematopoietic system phenotype; MP:0010771 integument phenotype; MP:0005380 embryo phenotype	[ORPHA:734] Alpha delta granule deficiency; [ORPHA:140957] Autosomal dominant macrothrombocytopenia; [ORPHA:721] GRAY PLATELET SYNDROME	OMIM ID:604383 Growth factor-independent 1b	Storage pool disease of platelets; Inborn genetic diseases; Platelet-type bleeding disorder 17		Bipolar Disorder;Calcium		Clinvar: phenotype not specified: pathogenic; Inborn genetic diseases: pathogenic; Platelet-type bleeding disorder 17: pathogenic	HP:0012526:Absence of alpha granules; HP:0003337:Reduced prothrombin consumption; HP:0000140:Abnormality of the menstrual cycle; HP:0011974:Myelofibrosis; HP:0031364:Ecchymosis; HP:0003010:Prolonged bleeding time; HP:0000967:Petechiae; HP:0002863:Myelodysplasia; HP:0000421:Epistaxis; HP:0002239:Gastrointestinal hemorrhage; HP:0000978:Bruising susceptibility; HP:0001873:Thrombocytopenia; HP:000382…		Absence of alpha granules; Reduced prothrombin consumption; Thrombasthenia-Thrombocytopenia, Hereditary; Platelet alpha-Granule Deficiency; Autosomal dominant macrothrombocytopenia; Abnormality of the menstrual cycle; Arthrogryposis with renal dysfunction and cholestasis syndrome; Arthrogryposis, renal dysfunction, and cholestasis 1; Platelet Storage Pool Deficiency; Hepatic Vein Thrombosis; Budd…	34	49	[{"UniProt":"A0A024R8F3","EnsemblGene":["ENSG00000165702"],"EnsemblTrans":[["ENST00000636137","ENSP00000490303","alternative2"]],"RefSeq":[["XM_006717297","XP_006717360","MODEL"],["XM_011519068","XP_011517370","MODEL"],["XM_011519069","XP_011517371","MODEL"],["XM_017015175","XP_016870664","MODEL"]],"SwissProt":["A0A024R8F3_HUMAN"]},{"UniProt":"Q5VTD9","EnsemblGene":["ENSG00000165702"],"SwissProt"…	liver;spleen	Distribution: Detected in some; Specificity: Group enriched	antibody: Strong nuclear staining was observed in a subset of bone marrow poietic cells. All other cell types were negative.; Nuclear expression in subsets of hematopoietic cells.	Antibody: All cancer tissues were negative.
Oncogene	TCL1A	8115	TCL1	TCL1 family AKT coactivator A	Overexpression of the TCL1 gene in humans has been implicated in the development of mature T cell leukemia, in which chromosomal rearrangements bring the TCL1 gene in close proximity to the T-cell antigen receptor (TCR)-alpha (MIM 186880) or TCR-beta (MIM 186930) regulatory elements (summarized by Virgilio et al., 1998 [PubMed 9520462]). In normal T cells TCL1 is expressed in CD4-/CD8- cells, but…	chr14:95714155-95694160	GO:0010918 positive regulation of mitochondrial membrane potential;GO:0045838 positive regulation of membrane potential;GO:0051881 regulation of mitochondrial membrane potential	[GO:0003674] molecular_function; [GO:0030234] enzyme regulator activity; [GO:0008150] biological_process; [GO:0006464] cellular protein modification process; [GO:0005575] cellular_component; [GO:0005622] intracellular; [GO:0043226] organelle; [GO:0005634] nucleus; [GO:0005737] cytoplasm; [GO:0008219] cell death; [GO:0005783] endoplasmic reticulum; [GO:0005654] nucleoplasm; [GO:0005829] cytosol; […	GO:0005783 endoplasmic reticulum;GO:0005654 nucleoplasm;GO:0012505 endomembrane system	GO:0043539 protein serine/threonine kinase activator activity;GO:0030295 protein kinase activator activity;GO:0019209 kinase activator activity		Predicted intracellular proteins; Disease related genes; Cancer-related genes	[IPR004832] TCL1/MTCP1; [IPR036672] TCL1/MTCP1 superfamily	Cytosol;Endoplasmic reticulum (reliability']); Additional: Nucleoplasm						principal1		MP:0005389 reproductive system phenotype	[ORPHA:99861] Precursor T-cell acute lymphoblastic leukemia	OMIM ID:186960 T-cell leukemia/lymphoma 1a		Body Height;C-Reactive Protein;Child Development Disorders, Pervasive;Personality;Platelet Function Tests;Sodium;Stroke	Aromatase Inhibitors;Neutrophils;Y Chromosome					Precursor Lymphoid Neoplasm; Medulloblastoma with extensive nodularity; T-cell lymphoblastic leukemia/lymphoma; Retroperitoneal liposarcoma; Autoimmune colitis; Hyperplastic lymph node; Hepatosplenic T-cell lymphoma; Primary cutaneous B-cell lymphoma; Anaplastic large cell lymphoma, ALK negative; CLL progression; Chronic leukemia (category); Mycosis fungoides/Sezary syndrome NOS; Lymphoma, AIDS-R…	62	88	[{"UniProt":"P56279","EnsemblGene":["ENSG00000100721"],"EnsemblTrans":[["ENST00000402399","ENSP00000385036","principal1"],["ENST00000554012","ENSP00000451506","principal1"],["ENST00000555202","ENSP00000450496","principal1"],["ENST00000556450","ENSP00000450701","principal1"]],"RefSeq":[["NM_001098725","NP_001092195","VALIDATED"],["NM_021966","NP_068801","VALIDATED"],["XM_017021676","XP_016877165",…	lymph_node	Distribution: Detected in some; Specificity: Group enriched	Distinct nuclear and cytoplasmic expression in subsets of immune cells in the mantle zone.; antibody: Lymphoid cells in lymphatic tissues, cells in seminiferus ducts and adrenal gland showed moderate to strong cytoplasmic positivity. Remaining normal cells were weakly stained or negative.	Antibody: A few lymphoma and testis cancer cases showed strong cytoplasmic positivity. Remaining cancer cells were weakly stained or negative.		(ko04151)PI3K-Akt signaling pathway; (hsa04151)PI3K-Akt signaling pathway			(M5956)HALLMARK KRAS SIGNALING DN
Oncogene	HMGA2	8091	BABL|HMGI-C|HMGIC|LIPO|SRS5|STQTL9	high mobility group AT-hook 2	This gene encodes a protein that belongs to the non-histone chromosomal high mobility group (HMG) protein family. HMG proteins function as architectural factors and are essential components of the enhancesome. This protein contains structural DNA-binding domains and may act as a transcriptional regulating factor. Identification of the deletion, amplification, and rearrangement of this gene that a…	chr12:65824460-65966291	GO:0003131 mesodermal-endodermal cell signaling;GO:2000685 positive regulation of cellular response to X-ray;GO:2000683 regulation of cellular response to X-ray	[GO:0008150] biological_process; [GO:0048856] anatomical structure development; [GO:0048646] anatomical structure formation involved in morphogenesis; [GO:0006950] response to stress; [GO:0007568] aging; [GO:0008283] cell population proliferation; [GO:0005575] cellular_component; [GO:0005622] intracellular; [GO:0043226] organelle; [GO:0005634] nucleus; [GO:0007049] cell cycle; [GO:0008219] cell d…	GO:0035985 senescence-associated heterochromatin focus;GO:0071141 SMAD protein complex;GO:0000792 heterochromatin	GO:0035501 MH1 domain binding;GO:0035500 MH2 domain binding;GO:0051575 5'-deoxyribose-5-phosphate lyase activity		Predicted intracellular proteins; Cancer-related genes:Candidate cancer biomarkers; Disease related genes; Transcription factors:beta-Sheet binding to DNA	[IPR000116] High mobility group protein HMGA; [IPR000637] HMG-I/HMG-Y, DNA-binding, conserved site; [IPR017956] AT hook, DNA-binding motif	Nucleoli;Nucleoplasm (reliability'])					yes			MP:0005376 homeostasis/metabolism phenotype; MP:0005384 cellular phenotype; MP:0005378 growth/size/body region phenotype; MP:0005386 behavior/neurological phenotype; MP:0005389 reproductive system phenotype; MP:0003631 nervous system phenotype; MP:0005377 hearing/vestibular/ear phenotype; MP:0005371 limbs/digits/tail phenotype; MP:0005379 endocrine/exocrine gland phenotype; MP:0010771 integument …	[ORPHA:94063] 12q14 microdeletion syndrome; [ORPHA:99970] Dedifferentiated liposarcoma; [ORPHA:454821] Pleomorphic salivary gland adenoma; [ORPHA:99971] Well-differentiated liposarcoma	OMIM ID:600698 High mobility group at-hook 2	Silver-Russell syndrome 5; Russell-Silver syndrome		Alzheimer Disease;Aorta;Axial Length, Eye;Birth Weight;Body Height;Body Mass Index;Brain;Bronchodilator Agents;Chin;Diabetes Mellitus, Type 2;Emotions;Head;Hip;Lung Volume Measurements;Odontogenesis;Polycystic Ovary Syndrome;Tooth Eruption;Waist Circumference		Russell-silver syndrome: pathogenic	HP:0010739:Osteopoikilosis; HP:0000131:Uterine leiomyoma; HP:0005288:Abnormality of the nares; HP:0012211:Abnormal renal physiology; HP:0003396:Syringomyelia; HP:0002579:Gastrointestinal dysmotility; HP:0001743:Abnormality of the spleen; HP:0000086:Ectopic kidney; HP:0002308:Arnold-Chiari malformation; HP:0000085:Horseshoe kidney; HP:0000953:Hyperpigmentation of the skin; HP:0002566:Intestinal ma…		Benign Mesenchymoma; Lipoma of breast; Lipomatous hamartoma; Neoplasms, Connective Tissue; Odontogenic myxofibroma; Vaginal Leiomyoma; Vulvar Deep Aggressive Angiomyxoma; endometrial polyp benign; 12q14 microdeletion syndrome; Birth length; Myolipoma; Parosteal lipoma; Conventional Lipoma; Hamartoma of lung; Intramuscular lipoma; Meigs Syndrome; Pulmonary lymphangiomyomatosis; Radiolabeled somato…	339	407	[{"UniProt":"F5H2A4","EnsemblGene":["ENSG00000149948"],"EnsemblTrans":[["ENST00000393577","ENSP00000377205",""]],"RefSeq":[["NM_001300918","NP_001287847","REVIEWED"]],"UCSC":["uc058qmd.1"],"SwissProt":["F5H2A4_HUMAN"]},{"UniProt":"F5H6H0","EnsemblGene":["ENSG00000149948"],"EnsemblTrans":[["ENST00000536545","ENSP00000437621",""]],"RefSeq":[["NM_001300919","NP_001287848","REVIEWED"]],"UCSC":["uc001…	larynx;small_intestine	Distribution: Detected in many; Specificity: Tissue enhanced	antibody: Most normal tissues showed weak to moderate nuclear positivity in varying fractions of cells. Spermatogonia, glial cells and trophoblastic cells were strongly stained.; Nuclear expression in most tissues.	Antibody: Several cases of most cancers showed weak to moderate nuclear positivity. Strong staining was observed in a few testis, urothelial, stomach, pancreatic and liver cancers.		(ko05202)Transcriptional misregulation in cancer; (hsa05202)Transcriptional misregulation in cancer; (ko05206)MicroRNAs in cancer
Oncogene	NCOA4	8031	ARA70|ELE1|PTC3|RFG	nuclear receptor coactivator 4	This gene encodes an androgen receptor coactivator. The encoded protein interacts with the androgen receptor in a ligand-dependent manner to enhance its transcriptional activity. Chromosomal translocations between this gene and the ret tyrosine kinase gene, also located on chromosome 10, have been associated with papillary thyroid carcinoma. Alternatively spliced transcript variants have been des…	chr10:46030623-46005088	GO:0071394 cellular response to testosterone stimulus;GO:0071391 cellular response to estrogen stimulus;GO:0006622 protein targeting to lysosome	[GO:0008150] biological_process; [GO:0042592] homeostatic process; [GO:0003674] molecular_function; [GO:0034641] cellular nitrogen compound metabolic process; [GO:0009058] biosynthetic process; [GO:0005575] cellular_component; [GO:0005622] intracellular; [GO:0043226] organelle; [GO:0005634] nucleus; [GO:0000003] reproduction; [GO:0048856] anatomical structure development; [GO:0005773] vacuole; [G…	GO:0044754 autolysosome;GO:0005767 secondary lysosome;GO:0005776 autophagosome	GO:0003713 transcription coactivator activity;GO:0003712 transcription coregulator activity;GO:0140110 transcription regulator activity		Disease related genes; Cancer-related genes:Mutational cancer driver genes; Predicted intracellular proteins	[IPR022174] Nuclear coactivator; [IPR039947] Nuclear receptor coactivator 4	Nucleoli (reliability']); Additional: Cytosol;Golgi apparatus								MP:0005376 homeostasis/metabolism phenotype; MP:0005384 cellular phenotype	[ORPHA:146] Differentiated thyroid carcinoma	OMIM ID:601984 Nuclear receptor coactivator 4			Erythrocyte Count;Erythrocyte Indices					Struma Ovarii; Mammary Analogue Secretory Carcinoma; Spindle Cell Neoplasm; Mixed follicular and papillary thyroid carcinoma; Follicular Variant Thyroid Gland Papillary Carcinoma; Salivary duct carcinoma; Multiple Endocrine Neoplasia Type 2a; Substance Withdrawal Syndrome; Alopecia, Male Pattern; Androgenetic Alopecia; Thyroid Nodule; Autoimmune thyroiditis; androgen independent prostate cancer; …	38	82	[{"UniProt":"Q13772","EnsemblGene":["ENSG00000266412"],"SwissProt":["NCOA4_HUMAN"]},{"UniProt":"A0A024QZI5","RefSeq":[["NM_001145262","NP_001138734","REVIEWED"],["NM_001145263","NP_001138735","REVIEWED"],["NM_005437","NP_005428","REVIEWED"]],"SwissProt":["A0A024QZI5_HUMAN"]},{"UniProt":"B2R5V0","RefSeq":[["NM_001145263","NP_001138735","REVIEWED"]],"SwissProt":["B2R5V0_HUMAN"]},{"UniProt":"Q96E88"…		Distribution: Detected in all; Specificity: Tissue enhanced	Cytoplasmic expression in several tissues.		(M58)PID AR PATHWAY	(ko05216)Thyroid cancer; (hsa05216)Thyroid cancer; (ko04216)Ferroptosis			(M5908)HALLMARK ANDROGEN RESPONSE; (M5945)HALLMARK HEME METABOLISM
Oncogene	KAT6A	7994	ARTHS|MOZ|MRD32|MYST-3|MYST3|RUNXBP2|ZC2HC6A|ZNF220	lysine acetyltransferase 6A	This gene encodes a member of the MOZ, YBFR2, SAS2, TIP60 family of histone acetyltransferases. The protein is composed of a nuclear localization domain, a double C2H2 zinc finger domain that binds to acetylated histone tails, a histone acetyl-transferase domain, a glutamate/aspartate-rich region, and a serine- and methionine-rich transactivation domain. It is part of a complex that acetylates ly…	chr8:42051988-41929479	GO:0043966 histone H3 acetylation;GO:0043967 histone H4 acetylation;GO:0090398 cellular senescence	[GO:0003674] molecular_function; [GO:0003677] DNA binding; [GO:0008150] biological_process; [GO:0034641] cellular nitrogen compound metabolic process; [GO:0009058] biosynthetic process; [GO:0005575] cellular_component; [GO:0005622] intracellular; [GO:0043226] organelle; [GO:0005634] nucleus; [GO:0032991] protein-containing complex; [GO:0005694] chromosome; [GO:0016746] transferase activity, trans…	GO:0070776 MOZ/MORF histone acetyltransferase complex;GO:0070775 H3 histone acetyltransferase complex;GO:0000123 histone acetyltransferase complex	GO:0004402 histone acetyltransferase activity;GO:0061733 peptide-lysine-N-acetyltransferase activity;GO:0034212 peptide N-acetyltransferase activity		Predicted intracellular proteins; Disease related genes; Transcription factors:Zinc-coordinating DNA-binding domains; Cancer-related genes; Enzymes; Potential drug targets; ENZYME proteins:Transferases	[IPR001965] Zinc finger, PHD-type; [IPR002717] Histone acetyltransferase domain, MYST-type; [IPR005818] Linker histone H1/H5, domain H15; [IPR011011] Zinc finger, FYVE/PHD-type; [IPR013083] Zinc finger, RING/FYVE/PHD-type; [IPR016181] Acyl-CoA N-acyltransferase; [IPR019787] Zinc finger, PHD-finger; [IPR031280] Histone acetyltransferase KAT6A; [IPR036388] Winged helix-like DNA-binding domain super…	Nuclear speckles (reliability']); Additional: Cytosol;Nucleoli						principal3		MP:0005370 liver/biliary system phenotype; MP:0005385 cardiovascular system phenotype; MP:0010768 mortality/aging; MP:0005376 homeostasis/metabolism phenotype; MP:0005384 cellular phenotype; MP:0005378 growth/size/body region phenotype; MP:0005386 behavior/neurological phenotype; MP:0005381 digestive/alimentary phenotype; MP:0005387 immune system phenotype; MP:0005389 reproductive system phenotyp…	[ORPHA:370026] Acute myeloid leukemia with t8; [ORPHA:457193] Autosomal dominant intellectual disability-craniofacial anomalies-cardiac defects syndrome	OMIM ID:601408 Lysine acetyltransferase 6a	Mental retardation, autosomal dominant 32; KAT6A syndrome; History of neurodevelopmental disorder; Congenital bilateral ptosis; Narrow mouth; Wide nose; Autistic behavior; Atonic seizures; Epicanthus inversus; Hypoplastic philtrum; Focal tonic seizures; Syndromic intellectual disability; Inborn genetic diseases	Platelet Function Tests		[616268] MENTAL RETARDATION AUTOSOMAL DOMINANT 32	Clinvar: phenotype not specified: likely pathogenic,pathogenic,uncertain significance; History of neurodevelopmental disorder: pathogenic; Inborn genetic diseases: pathogenic; Kat6a syndrome: pathogenic; Mental retardation, autosomal dominant 32: likely pathogenic,pathogenic,uncertain significance; Syndromic intellectual disability: pathogenic	HP:0007678:Lacrimal duct stenosis; HP:0002643:Neonatal respiratory distress; HP:0004467:Preauricular pit; HP:0000308:Microretrognathia; HP:0001601:Laryngomalacia; HP:0003552:Muscle stiffness; HP:0001357:Plagiocephaly; HP:0002566:Intestinal malrotation; HP:0000341:Narrow forehead; HP:0001363:Craniosynostosis; HP:0002714:Downturned corners of mouth; HP:0000455:Broad nasal tip; HP:0100704:Cerebral v…		MENTAL RETARDATION, AUTOSOMAL DOMINANT 32; Acute myeloid leukemia with t(8;16)(p11;p13) translocation; Leukemic infiltration of skin; Stenosis of nasolacrimal duct; obsolete Abnormal heart morphology; Protanomaly; Adult Acute Myelomonocytic Leukemia; Childhood Acute Myelomonocytic Leukemia; Hypoplastic fingernail; Acute monocytic/monoblastic leukemia; Histiocytosis haematophagic; Mixed phenotype …	34	69	[{"UniProt":"Q92794","EnsemblGene":["ENSG00000083168"],"EnsemblTrans":[["ENST00000265713","ENSP00000265713","principal3"],["ENST00000396930","ENSP00000380136","principal3"]],"RefSeq":[["NM_006766","NP_006757","REVIEWED"],["XM_017013863","XP_016869352","MODEL"],["XM_017013864","XP_016869353","MODEL"]],"UCSC":["uc003xon.4"],"SwissProt":["KAT6A_HUMAN"]},{"UniProt":"A5PLL3","EnsemblGene":["ENSG000000…		Distribution: Detected in all; Specificity: Low tissue specificity	Nuclear expression in all tissues.			(ko04550)Signaling pathways regulating pluripotency of stem cells; (hsa04550)Signaling pathways regulating pluripotency of stem cells
Oncogene	DEK	7913	D6S231E	DEK proto-oncogene	This gene encodes a protein with one SAP domain. This protein binds to cruciform and superhelical DNA and induces positive supercoils into closed circular DNA, and is also involved in splice site selection during mRNA processing. Chromosomal aberrations involving this region, increased expression of this gene, and the presence of antibodies against this protein are all associated with various dis…	chr6:18264541-18223860	GO:2001032 regulation of double-strand break repair via nonhomologous end joining;GO:0045815 positive regulation of gene expression, epigenetic;GO:2000779 regulation of double-strand break repair	[GO:0005575] cellular_component; [GO:0005622] intracellular; [GO:0043226] organelle; [GO:0005634] nucleus; [GO:0003674] molecular_function; [GO:0003723] RNA binding; [GO:0005654] nucleoplasm; [GO:0003677] DNA binding; [GO:0008150] biological_process; [GO:0051276] chromosome organization; [GO:0042393] histone binding; [GO:0007165] signal transduction; [GO:0034641] cellular nitrogen compound metabo…	GO:0043292 contractile fiber;GO:0099512 supramolecular fiber;GO:0099081 supramolecular polymer	GO:0042393 histone binding;GO:0003723 RNA binding;GO:0003677 DNA binding		Cancer-related genes:Candidate cancer biomarkers; Disease related genes; Predicted intracellular proteins	[IPR003034] SAP domain; [IPR014876] DEK, C-terminal; [IPR036361] SAP domain superfamily	Nucleoplasm (reliability'])					yes			MP:0010768 mortality/aging; MP:0005376 homeostasis/metabolism phenotype; MP:0005378 growth/size/body region phenotype; MP:0005381 digestive/alimentary phenotype; MP:0002006 neoplasm; MP:0005382 craniofacial phenotype	[ORPHA:402014] Acute myeloid leukemia with t6	OMIM ID:125264 Dek oncogene			thiopurine methyltransferase					Polyarticular juvenile idiopathic arthritis; Infant Acute Undifferentiated Leukemia; Iridocyclitis; Age-related cognitive decline; Human immunodeficiency virus, type 2 [HIV-2] infection in conditions classified elsewhere and of unspecified site; Laryngeal neoplasm; Tongue Neoplasms; Chemical Carcinogenesis; Acute Undifferentiated Leukemia; Childhood Hepatocellular Carcinoma; Adult Hepatocellular …	89	174	[{"UniProt":"H0Y993","EnsemblGene":["ENSG00000124795"],"EnsemblTrans":[["ENST00000507591","ENSP00000423427",""]],"RefSeq":[["XM_017011273","XP_016866762","MODEL"]],"UCSC":["uc063mbr.1"],"SwissProt":["H0Y993_HUMAN"]},{"UniProt":"P35659","EnsemblGene":["ENSG00000124795"],"SwissProt":["DEK_HUMAN"]}]		Distribution: Detected in all; Specificity: Low tissue specificity	Ubiquitous nuclear expression.; antibody: Moderate nuclear/nucleolar positivity was displayed in normal tissues. Additional cytoplasmic positivity was seen in Purkinje cells, colon, cardiac myocytes and ovarian follicle cells.	Antibody: Moderate nuclear/nucleolar positivity was observed in most cancer tissues. Several lymphomas were weakly stained.					(M5925)HALLMARK E2F TARGETS; (M5926)HALLMARK MYC TARGETS V1
Oncogene	YES1	7525	HsT441|P61-YES|Yes|c-yes	YES proto-oncogene 1, Src family tyrosine kinase	This gene is the cellular homolog of the Yamaguchi sarcoma virus oncogene. The encoded protein has tyrosine kinase activity and belongs to the src family of proteins. This gene lies in close proximity to thymidylate synthase gene on chromosome 18, and a corresponding pseudogene has been found on chromosome 22. [provided by RefSeq, Jul 2008]	chr18:812846-721588	GO:0036120 cellular response to platelet-derived growth factor stimulus;GO:0036119 response to platelet-derived growth factor;GO:0043114 regulation of vascular permeability	[GO:0003674] molecular_function; [GO:0043167] ion binding; [GO:0008150] biological_process; [GO:0006464] cellular protein modification process; [GO:0016301] kinase activity; [GO:0005575] cellular_component; [GO:0005737] cytoplasm; [GO:0005622] intracellular; [GO:0005829] cytosol; [GO:0005886] plasma membrane; [GO:0043226] organelle; [GO:0005856] cytoskeleton; [GO:0005794] Golgi apparatus; [GO:000…	GO:0099091 postsynaptic specialization, intracellular component;GO:0031234 extrinsic component of cytoplasmic side of plasma membrane;GO:0005884 actin filament	GO:0005154 epidermal growth factor receptor binding;GO:0001784 phosphotyrosine residue binding;GO:0004715 non-membrane spanning protein tyrosine kinase activity	Tyr protein kinase family	Predicted intracellular proteins; FDA approved drug targets:Small molecule drugs; Enzymes; Kinases:Tyr protein kinases; ENZYME proteins:Transferases	[IPR000719] Protein kinase domain; [IPR000980] SH2 domain; [IPR001245] Serine-threonine/tyrosine-protein kinase, catalytic domain; [IPR001452] SH3 domain; [IPR008266] Tyrosine-protein kinase, active site; [IPR011009] Protein kinase-like domain superfamily; [IPR017441] Protein kinase, ATP binding site; [IPR020635] Tyrosine-protein kinase, catalytic domain; [IPR035751] Tyrosine-protein kinase Yes, …	Cytosol;Plasma membrane (reliability'])					yes	principal1				OMIM ID:164880 V-yes-1 yamaguchi sarcoma viral oncogene		Exercise Test;Myocardial Infarction	Electrocardiography;Longevity;Respiratory Function Tests;Trypanosoma cruzi				Dasatinib; Fostamatinib	Double Outlet Right Ventricle, Noncommitted VSD; Double Outlet Right Ventricle, Subaortic VSD; Double Outlet Right Ventricle, Subpulmonary VSD; Taussig-Bing Anomaly; Heparin-induced thrombocytopenia; Vascular anomaly; Double Outlet Right Ventricle; Electrocardiogram: P-R interval; Recurrent ovarian cancer; Congenital malrotation of intestine; Mean blood pressure; Invasive Carcinoma; Refractory ca…	44	177	[{"UniProt":"P07947","EnsemblGene":["ENSG00000176105"],"EnsemblTrans":[["ENST00000314574","ENSP00000324740","principal1"],["ENST00000584307","ENSP00000462468","principal1"]],"RefSeq":[["NM_005433","NP_005424","REVIEWED"],["XM_017025960","XP_016881449","MODEL"]],"UCSC":["uc002kky.4"],"SwissProt":["YES_HUMAN"]}]		Distribution: Detected in all; Specificity: Low tissue specificity	Ubiquitous cytoplasmic expression.; antibody: Most normal tissues showed moderate to strong cytoplasmic positivity. Muscle cells were weakly stained or negative.	Antibody: Cancer cells displayed moderate to strong cytoplasmic immunoreactivity.	(M33)PID GLYPICAN 1PATHWAY; (M76)PID P38 ALPHA BETA PATHWAY; (M257)PID EPHRINB REV PATHWAY	(ko04520)Adherens junction; (hsa04520)Adherens junction
Oncogene	TAL1	6886	SCL|TCL5|bHLHa17|tal-1	TAL bHLH transcription factor 1, erythroid differentiation factor		chr1:47232389-47216290	GO:0060217 hemangioblast cell differentiation;GO:0030221 basophil differentiation;GO:0060375 regulation of mast cell differentiation	[GO:0003674] molecular_function; [GO:0008150] biological_process; [GO:0030154] cell differentiation; [GO:0048856] anatomical structure development; [GO:0042592] homeostatic process; [GO:0002376] immune system process; [GO:0034641] cellular nitrogen compound metabolic process; [GO:0009058] biosynthetic process; [GO:0005575] cellular_component; [GO:0005622] intracellular; [GO:0043226] organelle; [G…	GO:0033193 Lsd1/2 complex;GO:0000118 histone deacetylase complex;GO:0005667 transcription factor complex	GO:0070888 E-box binding;GO:0042826 histone deacetylase binding;GO:0001085 RNA polymerase II transcription factor binding		Transcription factors:Basic domains; Disease related genes; Cancer-related genes; Predicted intracellular proteins	[IPR011598] Myc-type, basic helix-loop-helix (bHLH) domain; [IPR036638] Helix-loop-helix DNA-binding domain superfamily; [IPR040238] T-cell acute lymphocytic leukemia protein-like	Nucleoplasm (reliability'])								MP:0005367 renal/urinary system phenotype; MP:0005370 liver/biliary system phenotype; MP:0005385 cardiovascular system phenotype; MP:0010768 mortality/aging; MP:0005369 muscle phenotype; MP:0005376 homeostasis/metabolism phenotype; MP:0005384 cellular phenotype; MP:0005378 growth/size/body region phenotype; MP:0005387 immune system phenotype; MP:0002006 neoplasm; MP:0003631 nervous system phenoty…	[ORPHA:99861] Precursor T-cell acute lymphoblastic leukemia	OMIM ID:187040 T-cell acute lymphocytic leukemia 1			Agranulocytosis;Body Mass Index;Clozapine			HP:0006721:Acute lymphoblastic leukemia; HP:0010982:Polygenic inheritance		Neurasthenia; Glottic Squamous Cell Carcinoma; Selective Mutism; Selective mutism specific to childhood and adolescence; T-cell lymphoblastic leukemia/lymphoma; Mild depression; Paranoid ideation; Urinary incontinence of non-organic origin; Psychoticism; Pectus excavatum; Disruptive Behavior Disorder; Tumor Lysis Syndrome; Acute anaemia; Adult attention deficit hyperactivity disorder; Hyperemesis…	82	133	[{"UniProt":"P17542","EnsemblGene":["ENSG00000162367"],"RefSeq":[["NM_001290406","NP_001277335","VALIDATED"]],"SwissProt":["TAL1_HUMAN"]},{"UniProt":"Q16509","RefSeq":[["NM_001287347","NP_001274276","VALIDATED"]],"SwissProt":["Q16509_HUMAN"]}]		Distribution: Detected in all; Specificity: Tissue enhanced	antibody: A subset of hematopoietic cells showed moderate nuclear staining whereas neuronal cells displayed weak cytoplasmic positivity. Other normal tissues were negative.; Nuclear expression in a subset of cells in bone marrow.	Antibody: Cancer tissues were negative.					(M5945)HALLMARK HEME METABOLISM
Oncogene	AURKA	6790	AIK|ARK1|AURA|BTAK|PPP1R47|STK15|STK6|STK7	aurora kinase A	The protein encoded by this gene is a cell cycle-regulated kinase that appears to be involved in microtubule formation and/or stabilization at the spindle pole during chromosome segregation. The encoded protein is found at the centrosome in interphase cells and at the spindle poles in mitosis. This gene may play a role in tumor development and progression. A processed pseudogene of this gene has …	chr20:56392308-56369390	GO:0007057 spindle assembly involved in female meiosis I;GO:1900195 positive regulation of oocyte maturation;GO:0007056 spindle assembly involved in female meiosis	[GO:0003674] molecular_function; [GO:0043167] ion binding; [GO:0008150] biological_process; [GO:0006464] cellular protein modification process; [GO:0016301] kinase activity; [GO:0007010] cytoskeleton organization; [GO:0007049] cell cycle; [GO:0000278] mitotic cell cycle; [GO:0000003] reproduction; [GO:0140014] mitotic nuclear division; [GO:0005575] cellular_component; [GO:0005737] cytoplasm; [GO:…	GO:0042585 germinal vesicle;GO:0001674 female germ cell nucleus;GO:0032133 chromosome passenger complex	GO:0035174 histone serine kinase activity;GO:0035173 histone kinase activity;GO:0004712 protein serine/threonine/tyrosine kinase activity	Other	Predicted intracellular proteins; Cancer-related genes:Candidate cancer biomarkers; Enzymes; ENZYME proteins:Transferases; Kinases	[IPR000719] Protein kinase domain; [IPR008271] Serine/threonine-protein kinase, active site; [IPR011009] Protein kinase-like domain superfamily; [IPR017441] Protein kinase, ATP binding site; [IPR030611] Aurora kinase A; [IPR030616] Aurora kinase	Centrosome;Cytosol;Nucleoplasm (reliability'])					yes	principal1		MP:0005370 liver/biliary system phenotype; MP:0010768 mortality/aging; MP:0005384 cellular phenotype; MP:0005378 growth/size/body region phenotype; MP:0002006 neoplasm; MP:0005391 vision/eye phenotype; MP:0005397 hematopoietic system phenotype; MP:0005380 embryo phenotype; MP:0005388 respiratory system phenotype		OMIM ID:603072 Aurora kinase a	Multiple myeloma				Colon cancer, susceptibility to: risk factor		Phosphonothreonine; AT9283; CYC116; Alisertib; SNS-314; Cenisertib; Enzastaurin; 4-(4-METHYLPIPERAZIN-1-YL)-N-[5-(2-THIENYLACETYL)-1,5-DIHYDROPYRROLO[3,4-C]PYRAZOL-3-YL]BENZAMIDE; AKI-001; 1-{5-[2-(thieno[3,2-d]pyrimidin-4-ylamino)ethyl]-1,3-thiazol-2-yl}-3-[3-(trifluoromethyl)phenyl]urea; 1-(5-{2-[(1-methyl-1H-pyrazolo[4,3-d]pyrimidin-7-yl)amino]ethyl}-1,3-thiazol-2-yl)-3-[3-(trifluoromethyl)phe…	COLON CANCER, SUSCEPTIBILITY TO; Aneuploidy; Chromosomal Instability; Donohue Syndrome; Aggressive Adult Non-Hodgkin Lymphoma; Advanced Urothelial Carcinoma; Adult Acute Monoblastic Leukemia; Childhood Acute Monoblastic Leukemia; Uterine Neoplasms; Uterine Corpus Carcinosarcoma; Acute monoblastic leukemia; Adenocarcinoma of lung, stage I; Hereditary Nonpolyposis Colorectal Neoplasms; Uterine Carc…	594	709	[{"UniProt":"O14965","EnsemblGene":["ENSG00000087586"],"EnsemblTrans":[["ENST00000312783","ENSP00000321591","principal1"],["ENST00000347343","ENSP00000216911","principal1"],["ENST00000371356","ENSP00000360407","principal1"],["ENST00000395911","ENSP00000379247","principal1"],["ENST00000395913","ENSP00000379249","principal1"],["ENST00000395914","ENSP00000379250","principal1"],["ENST00000395915","EN…		Distribution: Detected in many; Specificity: Group enriched	Cytoplasmic and nuclear expression most abundant in pachytene spermatocytes and immune cells.; antibody: Glandular cells in gastrointestinal tract and squamous epithelia showed moderate rare positivity. Cells in seminiferous ducts and cells in tonsil displayed moderate cytoplasmic and nuclear positivity. Remaining normal cells were negative.	Antibody: Cases of colorectal, ovarian and malignant lymphomas showed moderate to strong cytoplasmic and nuclear positivity. Remaining malignancies were weakly stained or negative.	(M242)PID AURORA A PATHWAY; (M14)PID AURORA B PATHWAY; (M71)PID ILK PATHWAY	(hsa04914)Progesterone-mediated oocyte maturation; (ko04114)Oocyte meiosis; (hsa04114)Oocyte meiosis			(M5951)HALLMARK SPERMATOGENESIS; (M5893)HALLMARK MITOTIC SPINDLE; (M5901)HALLMARK G2M CHECKPOINT	(M17370)BIOCARTA RANMS PATHWAY
Oncogene	SS18	6760	SSXT|SYT	SS18 subunit of BAF chromatin remodeling complex		chr18:26091219-26016253	GO:0097150 neuronal stem cell population maintenance;GO:0048013 ephrin receptor signaling pathway;GO:0019827 stem cell population maintenance	[GO:0003674] molecular_function; [GO:0008150] biological_process; [GO:0034641] cellular nitrogen compound metabolic process; [GO:0009058] biosynthetic process; [GO:0005575] cellular_component; [GO:0005622] intracellular; [GO:0043226] organelle; [GO:0005634] nucleus; [GO:0007010] cytoskeleton organization; [GO:0048856] anatomical structure development; [GO:0000902] cell morphogenesis; [GO:0007165]…	GO:0071564 npBAF complex;GO:0016514 SWI/SNF complex;GO:0070603 SWI/SNF superfamily-type complex	GO:0030374 nuclear receptor transcription coactivator activity;GO:0003713 transcription coactivator activity;GO:0003712 transcription coregulator activity		Predicted intracellular proteins; Disease related genes; Cancer-related genes	[IPR007726] SS18 family	Nucleoplasm (reliability']); Additional: Cytosol								MP:0005385 cardiovascular system phenotype; MP:0010768 mortality/aging; MP:0005376 homeostasis/metabolism phenotype; MP:0005378 growth/size/body region phenotype; MP:0003631 nervous system phenotype; MP:0005380 embryo phenotype	[ORPHA:3273] Synovial sarcoma	OMIM ID:600192 Synovial sarcoma translocation, chromosome 18		Child Development Disorders, Pervasive;Cholesterol, HDL;Cholesterol, LDL;Hip;Personality;Personality Inventory;Platelet Function Tests;Receptors, Interleukin-6	Arthritis, Juvenile;Body Weight;Electrocardiography;Motor Activity;Periodontitis;Polychlorinated Biphenyls;Rhegmatogenous Retinal Detachment, Autosomal Dominant;Schizophrenia;Selenium;Sulfonylurea Compounds					Synovial sarcoma, epithelioid cell; Monophasic Synovial Sarcoma; Synovial sarcoma, spindle cell; Synovial sarcoma metastatic; Synovial sarcoma non-metastatic; Sarcoma of kidney; Microcysts; Synovial sarcoma, biphasic; Adamantinoma; Adult Desmoplastic Small Round Cell Tumor; Childhood Desmoplastic Small Round Cell Tumor; Myoepithelioma; Desmoplastic Small Round Cell Tumor; Extraskeletal Myxoid Cho…	45	80	[{"UniProt":"B4DLD3","EnsemblGene":["ENSG00000141380"],"EnsemblTrans":[["ENST00000542420","ENSP00000438066",""]],"RefSeq":[["NM_001308201","NP_001295130","VALIDATED"],["XM_011526145","XP_011524447","MODEL"]],"UCSC":["uc010xbi.3"],"SwissProt":["B4DLD3_HUMAN"]},{"UniProt":"Q15532","EnsemblGene":["ENSG00000141380"],"RefSeq":[["NM_001308201","NP_001295130","VALIDATED"]],"SwissProt":["SSXT_HUMAN"]},{"…	tongue	Distribution: Detected in all; Specificity: Low tissue specificity	General nuclear expression.; antibody: Normal tissues displayed weak to moderate nuclear staining with additional cytoplasmic and membranous positivity in intestine. Hippocampus, ovary, spleen, skeletal and smooth muscle cells were negative.	Antibody: Cancer tissues displayed weak to moderate nuclear staining. Rare cases of breast, colorectal and stomach cancers were strongly positive. Majority of gliomas, renal and prostate cancers were negative.		(ko05202)Transcriptional misregulation in cancer; (hsa05202)Transcriptional misregulation in cancer			(M5901)HALLMARK G2M CHECKPOINT
Oncogene	SRC	6714	ASV|SRC1|THC6|c-SRC|p60-Src	SRC proto-oncogene, non-receptor tyrosine kinase	This gene is highly similar to the v-src gene of Rous sarcoma virus. This proto-oncogene may play a role in the regulation of embryonic development and cell growth. The protein encoded by this gene is a tyrosine-protein kinase whose activity can be inhibited by phosphorylation by c-SRC kinase. Mutations in this gene could be involved in the malignant progression of colon cancer. Two transcript va…	chr20:37344690-37406050	GO:0001545 primary ovarian follicle growth;GO:0086098 angiotensin-activated signaling pathway involved in heart process;GO:2000386 positive regulation of ovarian follicle development	[GO:0003674] molecular_function; [GO:0043167] ion binding; [GO:0008150] biological_process; [GO:0006464] cellular protein modification process; [GO:0016301] kinase activity; [GO:0005575] cellular_component; [GO:0005622] intracellular; [GO:0043226] organelle; [GO:0005634] nucleus; [GO:0005737] cytoplasm; [GO:0007049] cell cycle; [GO:0008219] cell death; [GO:0005829] cytosol; [GO:0005886] plasma me…	GO:0099091 postsynaptic specialization, intracellular component;GO:0002102 podosome;GO:0005901 caveola	GO:0071253 connexin binding;GO:0070700 BMP receptor binding;GO:0005158 insulin receptor binding	Tyr protein kinase family	Predicted intracellular proteins; FDA approved drug targets:Small molecule drugs; Transporters:Accessory Factors Involved in Transport; Disease related genes; Cancer-related genes:Candidate cancer biomarkers; Enzymes; Kinases:Tyr protein kinases; ENZYME proteins:Transferases	[IPR000719] Protein kinase domain; [IPR000980] SH2 domain; [IPR001245] Serine-threonine/tyrosine-protein kinase, catalytic domain; [IPR001452] SH3 domain; [IPR008266] Tyrosine-protein kinase, active site; [IPR011009] Protein kinase-like domain superfamily; [IPR017441] Protein kinase, ATP binding site; [IPR020635] Tyrosine-protein kinase, catalytic domain; [IPR036028] SH3-like domain superfamily; …	Cell Junctions;Plasma membrane (reliability']); Additional: Cytosol					yes			MP:0010768 mortality/aging; MP:0005378 growth/size/body region phenotype; MP:0005386 behavior/neurological phenotype; MP:0005387 immune system phenotype; MP:0005389 reproductive system phenotype; MP:0005391 vision/eye phenotype; MP:0005371 limbs/digits/tail phenotype; MP:0005390 skeleton phenotype; MP:0010771 integument phenotype; MP:0005380 embryo phenotype; MP:0001186 pigmentation phenotype; MP…	[ORPHA:480851] Hereditary thrombocytopenia with early-onset myelofibrosis	OMIM ID:190090 V-src avian sarcoma (schmidt-ruppin a-2) viral oncogene	Myelofibrosis; Osteoporosis; Thrombocytopenia; Thrombocytopenia 6; Neoplasm; Colon cancer, advanced	Child Development Disorders, Pervasive;Intelligence Tests	Carcinoma, Squamous Cell;Retinal Diseases		Colon cancer, advanced: likely pathogenic,pathogenic; Neoplasm: likely pathogenic,pathogenic; Thrombocytopenia 6: pathogenic	HP:0004406:Spontaneous, recurrent epistaxis; HP:0011974:Myelofibrosis; HP:0002003:Large forehead; HP:0002891:Uterine leiomyosarcoma; HP:0006716:Hereditary nonpolyposis colorectal carcinoma; HP:0006740:Transitional cell carcinoma of the bladder; HP:0031020:Bone marrow hypercellularity; HP:0006753:Neoplasm of the stomach; HP:0005584:Renal cell carcinoma; HP:0000601:Hypotelorism; HP:0001428:Somatic …	Dasatinib; RU84687; RU79256; N6-Benzyl Adenosine-5'-Diphosphate; RU85493; RU78262; Phosphonotyrosine; Malonic acid; RU83876; RU90395; RU79072; RU78783; 1-Tert-Butyl-3-(4-Chloro-Phenyl)-1h-Pyrazolo[3,4-D]Pyrimidin-4-Ylamine; PASBN; 2-[4-[(Z)-2-Acetamido-3-oxo-3-[[(3S)-2-oxo-1-[(4-phenylphenyl)methyl]azepan-3-yl]amino]prop-1-enyl]-2-formylphenyl]acetic acid; PAS219; DPI59; RU82197; Phenylphosphate;…	Amphetamine withdrawal; COLON CANCER, ADVANCED, SOMATIC; THROMBOCYTOPENIA 6; Advanced Cutaneous Melanoma of the Extremity; Acanthosis palmaris; Congenital Osteopetrosis; Giant Cell Granuloma; Atlantoaxial instability; Spontaneous, recurrent epistaxis; Large forehead; Nasopharyngeal Angiofibroma; Stage IV Colorectal Cancer; Stage IV Colorectal Cancer AJCC v7; Cherubism; Biliary Tract Carcinoma; Bo…	685	1386	[{"UniProt":"P12931","EnsemblGene":["ENSG00000197122"],"SwissProt":["SRC_HUMAN"]}]		Distribution: Detected in all; Specificity: Low tissue specificity	antibody: Cells in seminiferus ducts, urinary bladder and endocrine glands showed moderate cytoplasmic positivity. Neuropil displayed immunoreactivity. Remaining normal cells were weakly stained or negative.; Cytoplasmic and membranous expression in several tissues.	Antibody: Colorectal, prostate, urothelial, gastric, pancreatic and liver cancers showed moderate to strong cytoplasmic positivity. Remaining cancers were weakly stained or negative.	(M26)PID NFKAPPAB ATYPICAL PATHWAY; (M251)PID SYNDECAN 3 PATHWAY; (M273)PID EPHA2 FWD PATHWAY	(ko05219)Bladder cancer; (hsa05219)Bladder cancer; (ko04370)VEGF signaling pathway			(M5915)HALLMARK APICAL JUNCTION; (M5921)HALLMARK COMPLEMENT
Oncogene	SMO	6608	CRJS|FZD11|Gx|PHLS|SMOH	smoothened, frizzled class receptor	The protein encoded by this gene is a G protein-coupled receptor that interacts with the patched protein, a receptor for hedgehog proteins. The encoded protein tranduces signals to other proteins after activation by a hedgehog protein/patched protein complex. [provided by RefSeq, Jul 2010]	chr7:129188633-129213548	GO:0007371 ventral midline determination;GO:0072036 mesenchymal to epithelial transition involved in renal vesicle formation;GO:0072285 mesenchymal to epithelial transition involved in metanephric renal vesicle formation	[GO:0005575] cellular_component; [GO:0003674] molecular_function; [GO:0007165] signal transduction; [GO:0008150] biological_process; [GO:0040011] locomotion; [GO:0048870] cell motility; [GO:0005886] plasma membrane; [GO:0043226] organelle; [GO:0005929] cilium; [GO:0048856] anatomical structure development; [GO:0005576] extracellular region; [GO:0005615] extracellular space; [GO:0005737] cytoplasm…	GO:0097542 ciliary tip;GO:0005901 caveola;GO:0060170 ciliary membrane	GO:0005113 patched binding;GO:0004930 G protein-coupled receptor activity;GO:0004888 transmembrane signaling receptor activity		G-protein coupled receptors:GPCRs excl olfactory receptors; FDA approved drug targets:Small molecule drugs; Disease related genes; Cancer-related genes; Transporters; G-protein coupled receptors:Family fz/smo receptors	[IPR000539] Frizzled/Smoothened, transmembrane domain; [IPR015526] Frizzled/secreted frizzled-related protein; [IPR017981] GPCR, family 2-like; [IPR020067] Frizzled domain; [IPR026544] Smoothened; [IPR036790] Frizzled cysteine-rich domain superfamily; [IPR041771] Smoothened, cysteine-rich domain				yes	yes	yes	principal1	yes	MP:0005385 cardiovascular system phenotype; MP:0010768 mortality/aging; MP:0005369 muscle phenotype; MP:0005376 homeostasis/metabolism phenotype; MP:0005384 cellular phenotype; MP:0005378 growth/size/body region phenotype; MP:0005386 behavior/neurological phenotype; MP:0005381 digestive/alimentary phenotype; MP:0002006 neoplasm; MP:0003631 nervous system phenotype; MP:0005391 vision/eye phenotype…	[ORPHA:1553] Curry-Jones Syndrome	OMIM ID:601500 Smoothened, frizzled class receptor	Hamartoma of hypothalamus; Medulloblastoma; Basal cell carcinoma; Curry-Jones syndrome; Basal cell carcinoma, somatic			[601707] Curry-Jones Syndrome		HP:0009942:Duplication of thumb phalanx; HP:0010621:Cutaneous syndactyly of toes; HP:0001442:Somatic mosaicism; HP:0007206:Hemimegalencephaly; HP:0007099:Arnold-Chiari type I malformation; HP:0000588:Optic nerve coloboma; HP:0010554:Cutaneous finger syndactyly; HP:0012450:Chronic constipation; HP:0008065:Aplasia/Hypoplasia of the skin; HP:0002025:Anal stenosis; HP:0000951:Abnormality of the skin;…	Fluocinonide; Halcinonide; Vismodegib; Sonidegib; Glasdegib	Congenital corneal opacity; Maxillary Neoplasms; Winter Shortland Temple syndrome; Basal cell nevus; CULLER-JONES SYNDROME; Congenital dermal melanocytosis; Morning glory syndrome; Hypomelanotic macule; Linear hyperpigmentation; Localized Primitive Neuroectodermal Tumor; BASAL CELL CARCINOMA, SOMATIC; Fluoride Poisoning; Solid/Multicystic Ameloblastoma; Myxofibroma; High Grade Liver Dysplastic No…	105	137	[{"UniProt":"Q99835","EnsemblGene":["ENSG00000128602"],"EnsemblTrans":[["ENST00000249373","ENSP00000249373","principal1"]],"RefSeq":[["NM_005631","NP_005622","REVIEWED"]],"UCSC":["uc003vor.4"],"SwissProt":["SMO_HUMAN"]}]		Distribution: Detected in many; Specificity: Low tissue specificity	antibody: Most normal tissues displayed weak to moderate membranous or cytoplasmic staining. Cytotrophoblasts and cells in seminifeorus ducts showed strong cytoplasmic staining. Lymphoid tissues were negative.; Membranous and cytoplasmic expression in most tissues.	Antibody: Most cancer tissues howed weak to moderate cytoplasmic positivity. Lymphomas and several gliomas, cervical, skin and gastric cancers were negative.	(M211)PID HEDGEHOG 2PATHWAY; (M219)PID HEDGEHOG GLI PATHWAY	(ko04340)Hedgehog signaling pathway; (hsa04340)Hedgehog signaling pathway; (ko05217)Basal cell carcinoma	(hsa)Hedgehog signaling; (M00678)Hedgehog signaling			(M11792)BIOCARTA SHH PATHWAY
Oncogene	SKI	6497	SGS|SKV	SKI proto-oncogene	This gene encodes the nuclear protooncogene protein homolog of avian sarcoma viral (v-ski) oncogene. It functions as a repressor of TGF-beta signaling, and may play a role in neural tube development and muscle differentiation. [provided by RefSeq, Oct 2009]	chr1:2228319-2310213	GO:0043585 nose morphogenesis;GO:0010626 negative regulation of Schwann cell proliferation;GO:0010624 regulation of Schwann cell proliferation	[GO:0008150] biological_process; [GO:0034641] cellular nitrogen compound metabolic process; [GO:0009058] biosynthetic process; [GO:0003674] molecular_function; [GO:0007165] signal transduction; [GO:0005575] cellular_component; [GO:0005737] cytoplasm; [GO:0005622] intracellular; [GO:0008283] cell population proliferation; [GO:0043226] organelle; [GO:0005634] nucleus; [GO:0005654] nucleoplasm; [GO:…	GO:0017053 transcriptional repressor complex;GO:0016605 PML body;GO:0005667 transcription factor complex	GO:0046811 histone deacetylase inhibitor activity;GO:0035033 histone deacetylase regulator activity;GO:0070491 repressing transcription factor binding		Disease related genes; Predicted intracellular proteins	[IPR003380] SKI/SNO/DAC domain; [IPR009061] Putative DNA-binding domain superfamily; [IPR010919] SAND-like domain superfamily; [IPR014890] c-SKI SMAD4-binding domain; [IPR023216] Transcription regulator SKI/SnoN; [IPR028760] Ski oncogene; [IPR037000] Ski-like, DNA-binding domain superfamily	Nuclear bodies;Nucleoplasm (reliability'])					yes	principal1		MP:0005385 cardiovascular system phenotype; MP:0010768 mortality/aging; MP:0005369 muscle phenotype; MP:0005376 homeostasis/metabolism phenotype; MP:0005384 cellular phenotype; MP:0005378 growth/size/body region phenotype; MP:0002006 neoplasm; MP:0003631 nervous system phenotype; MP:0005391 vision/eye phenotype; MP:0005371 limbs/digits/tail phenotype; MP:0005390 skeleton phenotype; MP:0005380 emb…	[ORPHA:1606] 1p36 deletion syndrome; [ORPHA:2462] SHPRINTZEN-GOLDBERG SYNDROME	OMIM ID:164780 Ski protooncogene	Shprintzen-Goldberg syndrome; Disproportionate tall stature; Inborn genetic diseases; Clubfoot; High palate; Hypertelorism; Hypoplasia of the corpus callosum; Micrognathia		Immunoglobulins	[182212] Shprintzen-Goldberg craniosynostosis syndrome	Clinvar: phenotype not specified: likely pathogenic,pathogenic,uncertain significance; Disproportionate tall stature: likely pathogenic,uncertain significance; Inborn genetic diseases: pathogenic; Shprintzen-goldberg syndrome: likely pathogenic,pathogenic,uncertain significance	HP:0008440:C1-C2 vertebral abnormality; HP:0003717:Minimal subcutaneous fat; HP:0000892:Bifid ribs; HP:0000244:Brachyturricephaly; HP:0011228:Horizontal eyebrow; HP:0009023:Abdominal wall muscle weakness; HP:0001334:Communicating hydrocephalus; HP:0005815:Supernumerary ribs; HP:0001734:Annular pancreas; HP:0000895:Lateral clavicle hook; HP:0004378:Abnormality of the anus; HP:0000055:Abnormality o…		C1-C2 vertebral abnormality; Megacalycosis; Minimal subcutaneous fat; Schinzel-Giedion syndrome; Chromosome 1p36 Deletion Syndrome; succinic semialdehyde dehydrogenase deficiency; Bifid ribs; Brachyturricephaly; Pancreatitis due to pancreatic duct obstruction; Horizontal eyebrow; Congenital musculoskeletal anomalies; Hooked clavicle; Abnormality of female external genitalia; Abnormality of the an…	76	140	[{"UniProt":"P12755","EnsemblGene":["ENSG00000157933"],"EnsemblTrans":[["ENST00000378536","ENSP00000367797","principal1"]],"RefSeq":[["NM_003036","NP_003027","REVIEWED"]],"UCSC":["uc001aja.5"],"SwissProt":["SKI_HUMAN"]}]		Distribution: Detected in all; Specificity: Tissue enhanced	antibody: Most normal tissues showed weak to moderate cytoplasmic positivity. The liver, cells of endometrium and lymphoid tissues were in general negative. Squamous epithelia and cells of the CNS displayed nuclear staining.; Nuclear and cytoplasmic expression in most tissues.	Antibody: Weak to moderate cytoplasmic positivity was observed in most cancer cells. Lymphomas, renal, testicular, prostate and breast cancers were mainly negative.	(M181)PID BMP PATHWAY; (M2)PID SMAD2 3NUCLEAR PATHWAY; (M195)PID CMYB PATHWAY				(M5896)HALLMARK TGF BETA SIGNALING
Oncogene	BMI1	648	FLVI2/BMI1|PCGF4|RNF51|flvi-2/bmi-1	BMI1 proto-oncogene, polycomb ring finger	This gene encodes a ring finger protein that is major component of the polycomb group complex 1 (PRC1). This complex functions through chromatin remodeling as an essential epigenetic repressor of multiple regulatory genes involved in embryonic development and self-renewal in somatic stem cells. This protein also plays a central role in DNA damage repair. This gene is an oncogene and aberrant expr…	chr10:22321099-22331484	GO:0036353 histone H2A-K119 monoubiquitination;GO:0007379 segment specification;GO:0035518 histone H2A monoubiquitination	[GO:0008150] biological_process; [GO:0008283] cell population proliferation; [GO:0005575] cellular_component; [GO:0005622] intracellular; [GO:0043226] organelle; [GO:0005634] nucleus; [GO:0005737] cytoplasm; [GO:0003674] molecular_function; [GO:0043167] ion binding; [GO:0005829] cytosol; [GO:0051276] chromosome organization; [GO:0005654] nucleoplasm; [GO:0034641] cellular nitrogen compound metabo…	GO:0035102 PRC1 complex;GO:0000152 nuclear ubiquitin ligase complex;GO:0031519 PcG protein complex	GO:0071535 RING-like zinc finger domain binding;GO:1990841 promoter-specific chromatin binding;GO:0003682 chromatin binding		Cancer-related genes:Candidate cancer biomarkers; Predicted intracellular proteins	[IPR001841] Zinc finger, RING-type; [IPR013083] Zinc finger, RING/FYVE/PHD-type; [IPR017907] Zinc finger, RING-type, conserved site; [IPR032443] RAWUL domain	Nuclear bodies;Nucleoplasm (reliability']); Additional: Cytosol;Nucleoli						principal1		MP:0010768 mortality/aging; MP:0005376 homeostasis/metabolism phenotype; MP:0005384 cellular phenotype; MP:0005378 growth/size/body region phenotype; MP:0005386 behavior/neurological phenotype; MP:0005387 immune system phenotype; MP:0003631 nervous system phenotype; MP:0005391 vision/eye phenotype; MP:0005390 skeleton phenotype; MP:0005397 hematopoietic system phenotype; MP:0005379 endocrine/exoc…		OMIM ID:164831 Bmi1 protooncogene, polycomb ring finger								Acute rheumatic heart disease; Cervical polyp; Recurrent Childhood Medulloblastoma; Recurrent Medulloblastoma; Erythroplakia of mouth; Mantle cell lymphoma refractory; Phosphoglycerate Dehydrogenase Deficiency; Cap Myopathy; Pulmonary congestion; Chronic myeloid leukaemia transformation; Leukemia, Myeloid, Accelerated Phase; Aganglionosis, Rectosigmoid Colon; Pathologic Neovascularization; Congen…	438	526	[{"UniProt":"P35226","EnsemblGene":["ENSG00000168283"],"EnsemblTrans":[["ENST00000376663","ENSP00000365851","principal1"]],"RefSeq":[["NM_001204062","NP_001190991","VALIDATED"],["NM_005180","NP_005171","REVIEWED"]],"UCSC":["uc001irh.4"],"SwissProt":["BMI1_HUMAN"]}]		Distribution: Detected in all; Specificity: Low tissue specificity	General nuclear expression.; antibody: Most normal cells showed moderate nuclear immunoreactivity. Strong positivity was observed in cells of the airways, adrenal cortex and renal glomeruli.	Antibody: Most cancer tissues displayed weak to moderate nuclear staining. Several malignant gliomas were strongly stained. Lung and testicular cancers were negative in a majority of cases.	(M66)PID MYC ACTIV PATHWAY	(ko04550)Signaling pathways regulating pluripotency of stem cells; (hsa04550)Signaling pathways regulating pluripotency of stem cells; (ko05202)Transcriptional misregulation in cancer				(M22025)BIOCARTA PRC2 PATHWAY
Oncogene	NSD1	64324	ARA267|KMT3B|SOTOS|SOTOS1|STO	nuclear receptor binding SET domain protein 1	This gene encodes a protein containing a SET domain, 2 LXXLL motifs, 3 nuclear translocation signals (NLSs), 4 plant homeodomain (PHD) finger regions, and a proline-rich region. The encoded protein enhances androgen receptor (AR) transactivation, and this enhancement can be increased further in the presence of other androgen receptor associated coregulators. This protein may act as a nucleus-loca…	chr5:177131835-177300213	GO:0000414 regulation of histone H3-K36 methylation;GO:0034770 histone H4-K20 methylation;GO:1903025 regulation of RNA polymerase II regulatory region sequence-specific DNA binding	[GO:0005575] cellular_component; [GO:0005622] intracellular; [GO:0043226] organelle; [GO:0005634] nucleus; [GO:0003674] molecular_function; [GO:0008168] methyltransferase activity; [GO:0008150] biological_process; [GO:0051276] chromosome organization; [GO:0006464] cellular protein modification process; [GO:0043167] ion binding; [GO:0005694] chromosome; [GO:0034641] cellular nitrogen compound meta…	GO:0000785 chromatin;GO:0044427 chromosomal part;GO:0005694 chromosome	GO:0042799 histone methyltransferase activity (H4-K20 specific);GO:0046975 histone methyltransferase activity (H3-K36 specific);GO:0046965 retinoid X receptor binding		Predicted intracellular proteins; Disease related genes; Cancer-related genes:Mutational cancer driver genes; Enzymes; Potential drug targets; ENZYME proteins:Transferases; Cancer-related genes:Mutated cancer genes	[IPR000313] PWWP domain; [IPR001214] SET domain; [IPR001965] Zinc finger, PHD-type; [IPR003616] Post-SET domain; [IPR006560] AWS domain; [IPR011011] Zinc finger, FYVE/PHD-type; [IPR013083] Zinc finger, RING/FYVE/PHD-type; [IPR019786] Zinc finger, PHD-type, conserved site; [IPR019787] Zinc finger, PHD-finger; [IPR041306] NSD, Cys-His rich domain	Nucleoplasm;Plasma membrane (reliability'])					yes			MP:0010768 mortality/aging; MP:0005380 embryo phenotype	[ORPHA:228415] 5q35 microduplication syndrome; [ORPHA:238613] Beckwith-Wiedemann syndrome due to NSD1 mutation; [ORPHA:1627] Deletion 5q35; [ORPHA:821] SOTOS SYNDROME; [ORPHA:3447] Weaver syndrome	OMIM ID:606681 Nuclear receptor-binding set domain protein 1	Sotos syndrome 1; Beckwith-Wiedemann syndrome; Hypertelorism; Low-set ears; Neonatal asphyxia; Exotropia; Mitral valve prolapse; Intellectual disability; Abnormality of dental morphology; Osteoporosis; High palate; Long fingers; Abnormal facial shape; Intracranial hemorrhage; Downslanted palpebral fissures; Patent ductus arteriosus; Pes planus; Astigmatism; Protruding ear; Tall stature; Broad for…	Leukocyte Count;Platelet Function Tests	Age-Related Hearing Impairment 1;Body Height;Body Mass Index;Crown-Rump Length;Migraine Disorders;Thinness;Uric Acid;Waist Circumference;Waist-Hip Ratio	[130650] BECKWITH-WIEDEMANN SYNDROME; [117550] SOTOS SYNDROME; [277590] Weaver syndrome	Autistic disorder of childhood onset: pathogenic; Beckwith-wiedemann syndrome: likely pathogenic,pathogenic,uncertain significance; Clinvar: phenotype not specified: likely pathogenic,pathogenic,uncertain significance; Hypertelorism: likely pathogenic,pathogenic; Inborn genetic diseases: likely pathogenic,pathogenic; Preeclampsia: likely pathogenic,pathogenic; Sotos syndrome 1: likely pathogenic,…	HP:0030736:Sacrococcygeal teratoma; HP:0001814:Deep-set nails; HP:0006288:Advanced eruption of teeth; HP:0001816:Thin nail; HP:0002474:Expressive language delay; HP:0010300:Abnormally low-pitched voice; HP:0002280:Enlarged cisterna magna; HP:0001952:Glucose intolerance; HP:0002389:Cavum septum pellucidum; HP:0004375:Neoplasm of the nervous system; HP:0002370:Poor coordination; HP:0000075:Renal du…		5q35 microduplication syndrome; Ganglioglioma, Intracranial; SOTOS SYNDROME 1; Sparse anterior scalp hair; Chromosome 5, monosomy 5q35; Congenital hypertrophy; Talipes valgus; Tatton Brown Rahman syndrome; Nevo syndrome (disorder); Lipedema; Deep-set nails; Megalanecephaly Polymicrogyria-Polydactyly Hydrocephalus Syndrome; Sacrococcygeal teratoma; Weaver syndrome; Overfolding of the superior heli…	67	99	[{"UniProt":"Q96L73","EnsemblGene":["ENSG00000165671"],"SwissProt":["NSD1_HUMAN"]},{"UniProt":"Q96MN8","RefSeq":[["NM_172349","NP_758859","REVIEWED"]],"SwissProt":["Q96MN8_HUMAN"]}]		Distribution: Detected in all; Specificity: Low tissue specificity	Ubiquitous nuclear expression.			(ko00310)Lysine degradation; (hsa00310)Lysine degradation
Oncogene	SRSF2	6427	PR264|SC-35|SC35|SFRS2|SFRS2A|SRp30b	serine and arginine rich splicing factor 2	The protein encoded by this gene is a member of the serine/arginine (SR)-rich family of pre-mRNA splicing factors, which constitute part of the spliceosome. Each of these factors contains an RNA recognition motif (RRM) for binding RNA and an RS domain for binding other proteins. The RS domain is rich in serine and arginine residues and facilitates interaction between different SR splicing factors…	chr17:76737411-76734115	GO:0033197 response to vitamin E;GO:0045292 mRNA cis splicing, via spliceosome;GO:0000381 regulation of alternative mRNA splicing, via spliceosome	[GO:0003674] molecular_function; [GO:0003723] RNA binding; [GO:0008150] biological_process; [GO:0034641] cellular nitrogen compound metabolic process; [GO:0006397] mRNA processing; [GO:0005575] cellular_component; [GO:0005622] intracellular; [GO:0043226] organelle; [GO:0005634] nucleus; [GO:0005654] nucleoplasm; [GO:0005737] cytoplasm; [GO:0005829] cytosol; [GO:0009058] biosynthetic process; [GO:…	GO:0035061 interchromatin granule;GO:0016605 PML body;GO:0005681 spliceosomal complex	GO:0005080 protein kinase C binding;GO:0036002 pre-mRNA binding;GO:0003714 transcription corepressor activity		Predicted intracellular proteins; Cancer-related genes:Mutated cancer genes	[IPR000504] RNA recognition motif domain; [IPR003954] RNA recognition motif domain, eukaryote; [IPR012677] Nucleotide-binding alpha-beta plait domain superfamily; [IPR034893] Serine/arginine-rich splicing factor 2-like; [IPR035979] RNA-binding domain superfamily	Nucleoplasm (reliability']); Additional: Cytosol					yes			MP:0005385 cardiovascular system phenotype; MP:0010768 mortality/aging; MP:0005369 muscle phenotype; MP:0005384 cellular phenotype; MP:0005387 immune system phenotype; MP:0005397 hematopoietic system phenotype; MP:0005379 endocrine/exocrine gland phenotype	[ORPHA:98849] Systemic mastocytosis with associated hematologic neoplasm; [ORPHA:98823] Chronic myelomonocytic leukemia	OMIM ID:600813 Splicing factor, serine/arginine-rich, 2			Corneal Pachymetry			HP:0100495:Mastocytosis; HP:0012325:Chronic myelomonocytic leukemia; HP:0012539:Non-Hodgkin lymphoma; HP:0005506:Chronic myelogenous leukemia; HP:0004808:Acute myeloid leukemia; HP:0001880:Eosinophilia; HP:0002863:Myelodysplasia		Systemic mastocytosis with associated clonal, hematologic non-mast-cell lineage disease; Monosomy 7 of Bone Marrow; Ophthalmoplegia, Progressive Supranuclear; Supranuclear Palsy, Progressive, 1; Autosomal dominant vitreoretinochoroidopathy; Myeloproliferative Neoplasm, Unclassifiable; AMYOTROPHY, HEREDITARY NEURALGIC; Acute myeloid leukaemia progression; Adult Acute Monoblastic Leukemia; Childhoo…	95	237	[{"UniProt":"Q01130","EnsemblGene":["ENSG00000161547"],"SwissProt":["SRSF2_HUMAN"]},{"UniProt":"A0A024R8U5","RefSeq":[["NM_001195427","NP_001182356","REVIEWED"],["NM_003016","NP_003007","REVIEWED"],["XM_017024942","XP_016880431","MODEL"]],"SwissProt":["A0A024R8U5_HUMAN"]},{"UniProt":"Q53FN0","RefSeq":[["NM_001195427","NP_001182356","REVIEWED"]],"SwissProt":["Q53FN0_HUMAN"]}]		Distribution: Detected in all; Specificity: Low tissue specificity	General nuclear expression.; antibody: Normal tissues showed moderate to strong nuclear positivity. Additional cytoplasmic staining was observed in renal tubules, exocrine pancreas, small intestine and smooth muscles cells.	Antibody: Malignant tissues showed moderate to strong nuclear positivity. A few cases of melanomas, renal cell carcinomas and stomach cancers displayed additional cytoplasmic immunoreactivity.		(hsa03040)Spliceosome; (ko03040)Spliceosome; (ko05168)Herpes simplex infection			(M5901)HALLMARK G2M CHECKPOINT; (M5925)HALLMARK E2F TARGETS; (M5926)HALLMARK MYC TARGETS V1	(M22026)BIOCARTA SM PATHWAY
Oncogene	BCR	613	ALL|BCR1|CML|D22S11|D22S662|PHL	BCR activator of RhoGEF and GTPase	A reciprocal translocation between chromosomes 22 and 9 produces the Philadelphia chromosome, which is often found in patients with chronic myelogenous leukemia. The chromosome 22 breakpoint for this translocation is located within the BCR gene. The translocation produces a fusion protein which is encoded by sequence from both BCR and ABL, the gene at the chromosome 9 breakpoint. Although the BCR…	chr22:23180509-23318037	GO:0043314 negative regulation of neutrophil degranulation;GO:0060313 negative regulation of blood vessel remodeling;GO:1902564 negative regulation of neutrophil activation	[GO:0007165] signal transduction; [GO:0008150] biological_process; [GO:0003674] molecular_function; [GO:0019899] enzyme binding; [GO:0006464] cellular protein modification process; [GO:0030234] enzyme regulator activity; [GO:0016301] kinase activity; [GO:0005575] cellular_component; [GO:0043167] ion binding; [GO:0043226] organelle; [GO:0005737] cytoplasm; [GO:0005622] intracellular; [GO:0005829] …	GO:0099092 postsynaptic density, intracellular component;GO:0099091 postsynaptic specialization, intracellular component;GO:0098685 Schaffer collateral - CA1 synapse	GO:0005089 Rho guanyl-nucleotide exchange factor activity;GO:0005088 Ras guanyl-nucleotide exchange factor activity;GO:0017048 Rho GTPase binding		Predicted intracellular proteins; FDA approved drug targets:Small molecule drugs; Disease related genes; Cancer-related genes; Enzymes; ENZYME proteins:Transferases	[IPR000008] C2 domain; [IPR000198] Rho GTPase-activating protein domain; [IPR000219] Dbl homology (DH) domain; [IPR001331] Guanine-nucleotide dissociation stimulator, CDC24, conserved site; [IPR001849] Pleckstrin homology domain; [IPR008936] Rho GTPase activation protein; [IPR015123] Bcr-Abl oncoprotein oligomerisation; [IPR035892] C2 domain superfamily; [IPR035899] Dbl homology (DH) domain super…	Cytosol;Nucleoplasm (reliability'])								MP:0005367 renal/urinary system phenotype; MP:0005370 liver/biliary system phenotype; MP:0005376 homeostasis/metabolism phenotype; MP:0005384 cellular phenotype; MP:0005378 growth/size/body region phenotype; MP:0005381 digestive/alimentary phenotype; MP:0005387 immune system phenotype; MP:0005397 hematopoietic system phenotype	[ORPHA:521] Chronic myeloid leukemia; [ORPHA:261330] Distal 22q11.2 microdeletion syndrome; [ORPHA:99860] Precursor B-cell acute lymphoblastic leukemia; [ORPHA:99861] Precursor T-cell acute lymphoblastic leukemia	OMIM ID:151410 Breakpoint cluster region		Hip;Platelet Function Tests	Body Height;Vaccine Potency;coenzyme Q10			HP:0004848:Ph-positive acute lymphoblastic leukemia; HP:0004852:Reduced leukocyte alkaline phosphatase; HP:0001912:Abnormal basophil morphology; HP:0100033:Tics; HP:0000363:Abnormality of earlobe; HP:0009795:Branchial fistula; HP:0005506:Chronic myelogenous leukemia; HP:0001802:Absent toenail; HP:0005547:Myeloproliferative disorder; HP:0010296:Ankyloglossia; HP:0001817:Absent fingernail; HP:00067…	Imatinib; Dasatinib; Bosutinib; Ponatinib	High grade T-cell lymphoma; Osteomyelosclerosis; B Lymphoblastic Leukemia/Lymphoma, BCR-ABL1-Like; Recurrent Adult Acute Lymphoblastic Leukemia; Reduced leukocyte alkaline phosphatase; Abnormal basophil morphology; Chromosome 22q11.2 Deletion Syndrome, Distal; Myeloid Metaplasia; Childhood B Acute Lymphoblastic Leukemia with t(9;22)(q34.1;q11.2); BCR-ABL1; Chronic myelogenous leukemia, BCR/ABL po…	286	441	[{"UniProt":"P11274","EnsemblGene":["ENSG00000186716"],"SwissProt":["BCR_HUMAN"]}]		Distribution: Detected in all; Specificity: Low tissue specificity	antibody: Normal tissues showed moderate to strong cytoplasmic with additional membranous staining in several cases. Cells in glomeruli, smooth muscle cells and spleen were negative.; Cytoplasmic and membranous expression in most tissues.	Antibody: Cancer tissues showed weak to moderate cytoplasmic with additional membranous staining in several cases. A few cases of seminomas, malignant gliomas, lymphomas, colorectal and pancreatic cancers displayed strong positivity.	(M17200)SA B CELL RECEPTOR COMPLEXES; (M1315)SIG PIP3 SIGNALING IN B LYMPHOCYTES; (M241)PID RAC1 REG PATHWAY	(ko05220)Chronic myeloid leukemia; (hsa05220)Chronic myeloid leukemia; (hsa05200)Pathways in cancer			(M5893)HALLMARK MITOTIC SPINDLE	(M7897)BIOCARTA GLEEVEC PATHWAY; (M3342)BIOCARTA INTEGRIN PATHWAY
Oncogene	ROS1	6098	MCF3|ROS|c-ros-1	ROS proto-oncogene 1, receptor tyrosine kinase	This proto-oncogene, highly-expressed in a variety of tumor cell lines, belongs to the sevenless subfamily of tyrosine kinase insulin receptor genes. The protein encoded by this gene is a type I integral membrane protein with tyrosine kinase activity. The protein may function as a growth or differentiation factor receptor. [provided by RefSeq, Jul 2008]	chr6:117426065-117287353	GO:0010966 regulation of phosphate transport;GO:0006817 phosphate ion transport;GO:0038083 peptidyl-tyrosine autophosphorylation	[GO:0003674] molecular_function; [GO:0043167] ion binding; [GO:0005575] cellular_component; [GO:0008150] biological_process; [GO:0006464] cellular protein modification process; [GO:0016301] kinase activity; [GO:0007165] signal transduction; [GO:0005886] plasma membrane; [GO:0030154] cell differentiation; [GO:0000003] reproduction; [GO:0040007] growth; [GO:0019899] enzyme binding; [GO:0032991] pro…	GO:0043235 receptor complex;GO:0048471 perinuclear region of cytoplasm;GO:0009986 cell surface	GO:0004714 transmembrane receptor protein tyrosine kinase activity;GO:0019199 transmembrane receptor protein kinase activity;GO:0004713 protein tyrosine kinase activity	Tyr protein kinase family	Predicted intracellular proteins; Disease related genes; Cancer-related genes; Enzymes; Potential drug targets; Kinases:Tyr protein kinases; ENZYME proteins:Transferases	[IPR000033] LDLR class B repeat; [IPR000719] Protein kinase domain; [IPR001245] Serine-threonine/tyrosine-protein kinase, catalytic domain; [IPR002011] Tyrosine-protein kinase, receptor class II, conserved site; [IPR003961] Fibronectin type III; [IPR008266] Tyrosine-protein kinase, active site; [IPR011009] Protein kinase-like domain superfamily; [IPR011042] Six-bladed beta-propeller, TolB-like; […	Vesicles (reliability'])			yes	yes		principal2	yes	MP:0005384 cellular phenotype; MP:0005389 reproductive system phenotype	[ORPHA:357191] Selection of therapeutic option in non-small cell lung carcinoma	OMIM ID:165020 V-ros avian ur2 sarcoma virus oncogene homolog 1	Short stature; Abnormality of brain morphology; Lung adenocarcinoma	Adenocarcinoma of lung;Anger;Child Development Disorders, Pervasive;Eosinophils;Exercise Test;Heart Rate;Lung Neoplasms;Platelet Function Tests	Electrocardiography;Myopia, Degenerative		Abnormality of brain morphology: likely pathogenic		Entrectinib; Fostamatinib	Occult Lung Adenocarcinoma; TYLOSIS WITH ESOPHAGEAL CANCER; Tumor necrosis factor receptor associated periodic syndrome [TRAPS]; Lymphangitis carcinomatosa; NADH cytochrome B5 reductase deficiency; Vascular ring; Hypertensive end-organ damage; Mediastinal Neoplasms; Lipofibromatosis; Non-small cell lung cancer recurrent; Donohue Syndrome; Anaplastic large B-cell lymphoma; Adenocarcinoma of lung, …	132	161	[{"UniProt":"P08922","EnsemblGene":["ENSG00000047936"],"EnsemblTrans":[["ENST00000368508","ENSP00000357494","principal2"]],"RefSeq":[["NM_002944","NP_002935","REVIEWED"]],"UCSC":["uc003pxp.2"],"SwissProt":["ROS1_HUMAN"]}]		Distribution: Detected in some; Specificity: Tissue enhanced	antibody: Renal glomeruli showed moderate membranous staining. Moderate cytoplasmic and nuclear staining was observed in chondrocytes. Remaining normal tissues were negative.; Estimation of protein expression could not be performed. View primary data.	Antibody: A few cases of squamous cell carcinomas, malignant melanomas, colorectal and pancreatic cancers showed moderate nucleolar immunoreactivity. A single case of hepatocellular carcinoma was strongly stained. Remaining cancer tissues were negative.					(M5932)HALLMARK INFLAMMATORY RESPONSE
Oncogene	BCL6	604	BCL5|BCL6A|LAZ3|ZBTB27|ZNF51	BCL6 transcription repressor	The protein encoded by this gene is a zinc finger transcription factor and contains an N-terminal POZ domain. This protein acts as a sequence-specific repressor of transcription, and has been shown to modulate the transcription of STAT-dependent IL-4 responses of B cells. This protein can interact with a variety of POZ-containing proteins that function as transcription corepressors. This gene is …	chr3:187745472-187721377	GO:0032764 negative regulation of mast cell cytokine production;GO:1903464 negative regulation of mitotic cell cycle DNA replication;GO:0048294 negative regulation of isotype switching to IgE isotypes	[GO:0003674] molecular_function; [GO:0005575] cellular_component; [GO:0005622] intracellular; [GO:0043226] organelle; [GO:0005634] nucleus; [GO:0005737] cytoplasm; [GO:0005794] Golgi apparatus; [GO:0043167] ion binding; [GO:0005654] nucleoplasm; [GO:0003677] DNA binding; [GO:0008150] biological_process; [GO:0034641] cellular nitrogen compound metabolic process; [GO:0009058] biosynthetic process; …	GO:0005657 replication fork;GO:0005794 Golgi apparatus;GO:0044427 chromosomal part	GO:0001161 intronic transcription regulatory region sequence-specific DNA binding;GO:0044213 intronic transcription regulatory region DNA binding;GO:0031490 chromatin DNA binding		Cancer-related genes:Candidate cancer biomarkers; Disease related genes; Transcription factors:Zinc-coordinating DNA-binding domains; Predicted intracellular proteins	[IPR000210] BTB/POZ domain; [IPR011333] SKP1/BTB/POZ domain superfamily; [IPR013087] Zinc finger C2H2-type; [IPR036236] Zinc finger C2H2 superfamily	Nucleoplasm (reliability']); Additional: Golgi apparatus								MP:0005370 liver/biliary system phenotype; MP:0005385 cardiovascular system phenotype; MP:0010768 mortality/aging; MP:0005369 muscle phenotype; MP:0005376 homeostasis/metabolism phenotype; MP:0005384 cellular phenotype; MP:0005378 growth/size/body region phenotype; MP:0005387 immune system phenotype; MP:0005389 reproductive system phenotype; MP:0005397 hematopoietic system phenotype; MP:0005379 e…	[ORPHA:545] Follicular lymphoma; [ORPHA:480541] High grade B-cell lymphoma with MYC and/ or BCL2 and/or BCL6 rearrangement; [ORPHA:98839] Intravascular large B-cell lymphoma; [ORPHA:98838] Primary mediastinal large B-cell lymphoma	OMIM ID:109565 B-cell lymphoma 6		Cell Adhesion Molecules;Child Development Disorders, Pervasive;Cholesterol, HDL;Eosinophils;Hemoglobins;Platelet Count;Platelet Function Tests;Transforming Growth Factor beta;Urine	Adipose Tissue;Antineoplastic Agents;Biomarkers;Blood Urea Nitrogen;Body Mass Index;Diabetes Mellitus, Type 2;Electrocardiography;Epirubicin;Glucose;Lung Volume Measurements;Lymphoma;Myopia, Degenerative;Obesity;Subcutaneous Fat, Abdominal;Uric Acid;dimethylarginine			HP:0200036:Skin nodule; HP:0002585:Abnormality of the peritoneum; HP:0030166:Night sweats; HP:0100721:Mediastinal lymphadenopathy; HP:0002202:Pleural effusion; HP:0001004:Lymphedema; HP:0001287:Meningitis; HP:0002665:Lymphoma; HP:0001824:Weight loss; HP:0001945:Fever; HP:0012378:Fatigue; HP:0001744:Splenomegaly		refractory chronic myelocytic leukemia; Follicular non-Hodgkin's lymphoma, large cell; B-cell lymphoma with features intermediate between diffuse large B-cell lymphoma and Burkitt lymphoma; Hodgkin lymphoma, nodular lymphocyte predominance; T-Lymphocytopenia, Idiopathic CD4-Positive; Double expressor lymphoma; Cutaneous Follicular Lymphoma; High Grade B-Cell Lymphoma, Not Otherwise Specified; sta…	286	373	[{"UniProt":"P41182","EnsemblGene":["ENSG00000113916"],"SwissProt":["BCL6_HUMAN"]},{"UniProt":"B5B0A5","RefSeq":[["NM_001134738","NP_001128210","REVIEWED"]],"SwissProt":["B5B0A5_HUMAN"]}]	blood	Distribution: Detected in all; Specificity: Tissue enhanced	antibody: Cells in lymphoid reaction centra showed moderate nuclear positivity. Remaining normal cells were generally negative.; Nuclear expression, mainly in lymphoid tissues.	Antibody: Selected cases of lymphomas showed strong nuclear positivity. Few cases of gastic cancer showed cytoplasmic immunoreactivity. Remaining cancers were negative.	(M30)PID HDAC CLASSII PATHWAY; (M136)PID FOXO PATHWAY; (M28)PID IL4 2PATHWAY	(hsa04068)foxo signaling pathway; (ko05202)Transcriptional misregulation in cancer; (hsa05202)Transcriptional misregulation in cancer			(M5890)HALLMARK TNFA SIGNALING VIA NFKB; (M5905)HALLMARK ADIPOGENESIS
Oncogene	BCL3	602	BCL4|D19S37	BCL3 transcription coactivator	This gene is a proto-oncogene candidate. It is identified by its translocation into the immunoglobulin alpha-locus in some cases of B-cell leukemia. The protein encoded by this gene contains seven ankyrin repeats, which are most closely related to those found in I kappa B proteins. This protein functions as a transcriptional co-activator that activates through its association with NF-kappa B homo…	chr19:44742620-44760044	GO:0002268 follicular dendritic cell differentiation;GO:0002266 follicular dendritic cell activation;GO:0002315 marginal zone B cell differentiation	[GO:0003674] molecular_function; [GO:0005575] cellular_component; [GO:0005622] intracellular; [GO:0043226] organelle; [GO:0005634] nucleus; [GO:0005737] cytoplasm; [GO:0008150] biological_process; [GO:0008219] cell death; [GO:0005654] nucleoplasm; [GO:0005829] cytosol; [GO:0005886] plasma membrane; [GO:0006950] response to stress; [GO:0034641] cellular nitrogen compound metabolic process; [GO:000…	GO:0032996 Bcl3-Bcl10 complex;GO:0033257 Bcl3/NF-kappaB2 complex;GO:0033256 I-kappaB/NF-kappaB complex	GO:0030674 protein binding, bridging;GO:0060090 molecular adaptor activity;GO:0008134 transcription factor binding		Predicted intracellular proteins; Cancer-related genes:Candidate cancer biomarkers; Disease related genes; Transcription factors:Immunoglobulin fold	[IPR002110] Ankyrin repeat; [IPR020683] Ankyrin repeat-containing domain; [IPR036770] Ankyrin repeat-containing domain superfamily	Nucleoplasm (reliability']); Additional: Midbody;Vesicles					yes	principal2		MP:0010768 mortality/aging; MP:0005376 homeostasis/metabolism phenotype; MP:0005384 cellular phenotype; MP:0005378 growth/size/body region phenotype; MP:0005387 immune system phenotype; MP:0005397 hematopoietic system phenotype; MP:0005382 craniofacial phenotype		OMIM ID:109560 B-cell leukemia/lymphoma 3		Body Height;Cholesterol, LDL	Adenocarcinoma Of Esophagus;Atrial Fibrillation;Barrett Esophagus;Blood Pressure;Body Mass Index;Cholesterol;Cholesterol, HDL;Coronary Disease;Diabetes Mellitus;Digestive System Diseases;Electrocardiography;Glucose;Heart Failure;Hematocrit;Lipids;Mortality;Neoplasms;Stroke;Triglycerides					Lymphoepithelioid lymphoma (clinical); Gastric Diffuse Large B-Cell Lymphoma; OTOFACIOCERVICAL SYNDROME 1; Double-Hit Lymphoma; Dyslipoproteinemias; Hemophagocytic Syndrome; Autoantibody measurement; Indolent Non-Hodgkin Lymphoma; OROFACIAL CLEFT 1; Adult Diffuse Large Cell Lymphoma; Childhood Diffuse Large Cell Lymphoma; Resistance to Insulin-Like Growth Factor I; Atherogenesis; Trisomy 12; Clef…	81	126	[{"UniProt":"P20749","EnsemblGene":["ENSG00000069399"],"EnsemblTrans":[["ENST00000164227","ENSP00000164227","principal2"]],"RefSeq":[["NM_005178","NP_005169","REVIEWED"]],"UCSC":["uc010xxe.3"],"SwissProt":["BCL3_HUMAN"]},{"UniProt":"B7Z3N9","RefSeq":[["XM_017027110","XP_016882599","MODEL"]],"SwissProt":["B7Z3N9_HUMAN"]}]		Distribution: Detected in all; Specificity: Low tissue specificity	antibody: Cells of placenta, glandular epithelia of the gastrointestinal tract and basal layers of squamous epithelia showed moderate to strong nuclear staining. Cilia of bronchus and epididymis were distinctly positive. Remaining normal tissues were in general negative.; Mainly nuclear expression in several tissues.	Antibody: Weak to moderate nuclear immunoreactivity was observed in few urothelial-, breast- and cervical cancers and lymphomas. Most other cancer tissues were negative.	(M26)PID NFKAPPAB ATYPICAL PATHWAY	(ko04668)TNF signaling pathway; (hsa04625)c-type lectin receptor signaling pathway; (hsa04668)TNF signaling pathway			(M5890)HALLMARK TNFA SIGNALING VIA NFKB; (M5901)HALLMARK G2M CHECKPOINT; (M5950)HALLMARK ALLOGRAFT REJECTION
Oncogene	CCND1	595	BCL1|D11S287E|PRAD1|U21B31	cyclin D1	The protein encoded by this gene belongs to the highly conserved cyclin family, whose members are characterized by a dramatic periodicity in protein abundance throughout the cell cycle. Cyclins function as regulators of CDK kinases. Different cyclins exhibit distinct expression and degradation patterns which contribute to the temporal coordination of each mitotic event. This cyclin forms a comple…	chr11:69641156-69654474	GO:0000320 re-entry into mitotic cell cycle;GO:0070141 response to UV-A;GO:0033601 positive regulation of mammary gland epithelial cell proliferation	[GO:0005575] cellular_component; [GO:0008150] biological_process; [GO:0006464] cellular protein modification process; [GO:0005622] intracellular; [GO:0043226] organelle; [GO:0005634] nucleus; [GO:0005737] cytoplasm; [GO:0007049] cell cycle; [GO:0005654] nucleoplasm; [GO:0051301] cell division; [GO:0006950] response to stress; [GO:0005635] nuclear envelope; [GO:0003674] molecular_function; [GO:003…	GO:0000307 cyclin-dependent protein kinase holoenzyme complex;GO:0017053 transcriptional repressor complex;GO:1902554 serine/threonine protein kinase complex	GO:0070064 proline-rich region binding;GO:0016538 cyclin-dependent protein serine/threonine kinase regulator activity;GO:0042826 histone deacetylase binding		Predicted intracellular proteins; FDA approved drug targets:Small molecule drugs; Disease related genes; Cancer-related genes:Candidate cancer biomarkers; Cancer-related genes:Mutational cancer driver genes; Cancer-related genes:Mutated cancer genes	[IPR004367] Cyclin, C-terminal domain; [IPR006671] Cyclin, N-terminal; [IPR013763] Cyclin-like; [IPR015451] Cyclin D; [IPR036915] Cyclin-like superfamily; [IPR039361] Cyclin	Nucleoplasm (reliability'])						principal1		MP:0005370 liver/biliary system phenotype; MP:0005385 cardiovascular system phenotype; MP:0010768 mortality/aging; MP:0005369 muscle phenotype; MP:0005384 cellular phenotype; MP:0005378 growth/size/body region phenotype; MP:0005386 behavior/neurological phenotype; MP:0005381 digestive/alimentary phenotype; MP:0002006 neoplasm; MP:0005389 reproductive system phenotype; MP:0005391 vision/eye phenot…	[ORPHA:67038] B-cell chronic lymphocytic leukemia; [ORPHA:52416] MANTLE CELL LYMPHOMA; [ORPHA:29073] Multiple myeloma	OMIM ID:168461 Cyclin d1		Monocytes;Platelet Function Tests;Triiodothyronine	Body Height;Body Mass Index;Breast;Breast Neoplasms;Carcinoma, Renal Cell;Hip;Melanoma;Multiple Myeloma;Primary amyloidosis		Colorectal cancer, susceptibility to: risk factor; Immunoglobulin light chain (al) amyloidosis: risk factor; Immunoglobulin light chain (al) amyloidosis (heart involvement): risk factor; Immunoglobulin light chain (al) amyloidosis (kidney involvement): risk factor; Immunoglobulin light chain (al) amyloidosis (serum ig lambda profile): risk factor; Immunoglobulin light chain (al) amyloidosis (seru…	HP:0004341:Abnormality of vitamin B12 metabolism; HP:0002152:Hyperproteinemia; HP:0006880:Cerebellar hemangioblastoma; HP:0031047:Paraproteinemia; HP:0009713:Spinal hemangioblastoma; HP:0005954:Pulmonary capillary hemangiomatosis; HP:0006775:Multiple myeloma; HP:0030424:Epididymal cyst; HP:0009715:Papillary cystadenoma of the epididymis; HP:0011034:Amyloidosis; HP:0000014:Abnormality of the bladd…	Acetylsalicylic acid; Arsenic trioxide; Encorafenib; Bryostatin 1	Abnormality of vitamin B12 metabolism; Atypical follicular adenoma; Centrocytic (mantle cell) lymphoma (Kiel classification); Gastric Precancerous Condition; Head and Neck Basaloid Carcinoma; Low Grade Ductal Breast Carcinoma In Situ; Lymphoplasmacytoid immunocytoma; MULTIPLE MYELOMA, t(11;14) TYPE, SUSCEPTIBILITY TO; Synchronous Bilateral Breast Carcinoma; VON HIPPEL-LINDAU SYNDROME, MODIFIER OF…	1339	1557	[{"UniProt":"P24385","EnsemblGene":["ENSG00000110092"],"EnsemblTrans":[["ENST00000227507","ENSP00000227507","principal1"]],"RefSeq":[["NM_053056","NP_444284","REVIEWED"]],"SwissProt":["CCND1_HUMAN"]},{"UniProt":"Q6FI00","RefSeq":[["NM_053056","NP_444284","REVIEWED"]],"UCSC":["uc001opa.4"],"SwissProt":["Q6FI00_HUMAN"]}]		Distribution: Detected in many; Specificity: Low tissue specificity	Cytoplasmic and nuclear expression in several tissues.; antibody: Strong cytoplasmic staining was observed in hepatocytes. A subset of basal cells of squamous epithelium showed moderate to strong nuclear staining. Remaining normal tissues were weakly stained or negative.	Antibody: Few cases of melanoma, liver, renal, urothelial and prostate cancers showed moderate to strong immunoreactivity. Remaining cancer tissues were weakly stained or negative.	(M209)PID P38 GAMMA DELTA PATHWAY; (M3686)SA REG CASCADE OF CYCLIN EXPR; (M1529)SA G1 AND S PHASES	(ko05216)Thyroid cancer; (hsa05216)Thyroid cancer; (ko05219)Bladder cancer	(hsa)Cell cycle - G1/S transition; (M00692)Cell cycle - G1/S transition		(M5903)HALLMARK NOTCH SIGNALING; (M5908)HALLMARK ANDROGEN RESPONSE; (M5902)HALLMARK APOPTOSIS	(M22014)BIOCARTA BTG2 PATHWAY; (M14863)BIOCARTA P53 PATHWAY; (M11106)BIOCARTA GSK3 PATHWAY
Oncogene	RAF1	5894	CMD1NN|CRAF|NS5|Raf-1|c-Raf	Raf-1 proto-oncogene, serine/threonine kinase	This gene is the cellular homolog of viral raf gene (v-raf). The encoded protein is a MAP kinase kinase kinase (MAP3K), which functions downstream of the Ras family of membrane associated GTPases to which it binds directly. Once activated, the cellular RAF1 protein can phosphorylate to activate the dual specificity protein kinases MEK1 and MEK2, which in turn phosphorylate to activate the serine/…	chr3:12664117-12583601	GO:0071550 death-inducing signaling complex assembly;GO:0035994 response to muscle stretch;GO:0030878 thyroid gland development	[GO:0003674] molecular_function; [GO:0043167] ion binding; [GO:0007165] signal transduction; [GO:0008150] biological_process; [GO:0006464] cellular protein modification process; [GO:0016301] kinase activity; [GO:0008283] cell population proliferation; [GO:0005575] cellular_component; [GO:0005622] intracellular; [GO:0043226] organelle; [GO:0005634] nucleus; [GO:0005737] cytoplasm; [GO:0005654] nuc…	GO:0031143 pseudopodium;GO:0005741 mitochondrial outer membrane;GO:0031968 organelle outer membrane	GO:0010856 adenylate cyclase activator activity;GO:0008179 adenylate cyclase binding;GO:0031434 mitogen-activated protein kinase kinase binding	TKL Ser/Thr protein kinase family	Predicted intracellular proteins; FDA approved drug targets:Small molecule drugs; Disease related genes; Cancer-related genes:Candidate cancer biomarkers; Enzymes; Kinases:TKL Ser/Thr protein kinases; ENZYME proteins:Transferases; RAS pathway related proteins	[IPR000719] Protein kinase domain; [IPR001245] Serine-threonine/tyrosine-protein kinase, catalytic domain; [IPR002219] Protein kinase C-like, phorbol ester/diacylglycerol-binding domain; [IPR003116] Raf-like Ras-binding; [IPR008271] Serine/threonine-protein kinase, active site; [IPR011009] Protein kinase-like domain superfamily; [IPR017441] Protein kinase, ATP binding site; [IPR020454] Diacylglyc…	Nuclear speckles (reliability'])								MP:0005370 liver/biliary system phenotype; MP:0005385 cardiovascular system phenotype; MP:0010768 mortality/aging; MP:0005369 muscle phenotype; MP:0005376 homeostasis/metabolism phenotype; MP:0005384 cellular phenotype; MP:0005378 growth/size/body region phenotype; MP:0005386 behavior/neurological phenotype; MP:0005387 immune system phenotype; MP:0003631 nervous system phenotype; MP:0005391 visio…	[ORPHA:154] Familial isolated dilated cardiomyopathy; [ORPHA:648] Noonan Syndrome; [ORPHA:500] Noonan syndrome with multiple lentigines; [ORPHA:251615] Pilomyxoid astrocytoma	OMIM ID:164760 Raf1 protooncogene, serine/threonine kinase	LEOPARD syndrome 2; Rasopathy; Inborn genetic diseases; not specified; Noonan syndrome 3; Cardiomyopathy, dilated, 1NN; Noonan syndrome 5; Cutaneous melanoma; Noonan syndrome; Dilated cardiomyopathy; Primary familial hypertrophic cardiomyopathy; Cardiovascular phenotype; Neurodevelopmental disorder; Noonan syndrome with multiple lentigines; Neoplasm of the large intestine; Malignant melanoma of s…		Cardiomegaly;Cholesterol	[611553] NOONAN SYNDROME 5		HP:0008625:Severe sensorineural hearing impairment; HP:0011710:Bundle branch block; HP:0001003:Multiple lentigines; HP:0004414:Abnormality of the pulmonary artery; HP:0011381:Aplasia of the semicircular canal; HP:0011869:Abnormal platelet function; HP:0004308:Ventricular arrhythmia; HP:0004306:Abnormal endocardium morphology; HP:0002212:Curly hair; HP:0100625:Enlarged thorax; HP:0007392:Excessive…	Sorafenib; LErafAON; XL281; iCo-007; Cholecystokinin; Regorafenib; Dabrafenib; Fostamatinib	CARDIOMYOPATHY, DILATED, 1NN; Disorders of both mitral and tricuspid valves; LEOPARD SYNDROME 2; Neonatal testicular torsion; Noonan Syndrome 5; Pointed helix; Cleft leaflet of mitral valve; Congenital anomaly of cerebrovascular system; reproductive system disorder; Malignant tumor, fusiform cell type; Benign Struma Ovarii; GIANT PIGMENTED HAIRY NEVUS; Bisphosphonate-associated osteonecrosis; Leo…	262	618	[{"UniProt":"P04049","EnsemblGene":["ENSG00000132155"],"RefSeq":[["XM_005265355","XP_005265412"]],"SwissProt":["RAF1_HUMAN"]},{"UniProt":"A0A0S2Z4L5","RefSeq":[["XM_005265357","XP_005265414"],["XM_017006966","XP_016862455","MODEL"]],"SwissProt":["A0A0S2Z4L5_HUMAN"]},{"UniProt":"L7RRS6","RefSeq":[["NM_002880","NP_002871","REVIEWED"],["XM_005265355","XP_005265412"],["XM_011533974","XP_011532276","M…		Distribution: Detected in all; Specificity: Low tissue specificity	antibody: Squamous epithelium, gallbladder, urothelium and male genitalia showed moderate to strong nuclear positivity. Tubuli in kidney and exocrine pancreas displayed cytoplasmic positivity. Cells in CNS, myocytes and most lymphoid tissues showed weak positivity or were negative.; Mainly nuclear expression in most tissues.	Antibody: Most cancer cells showed moderate to strong nuclear positivity.	(M134)PID TCR RAS PATHWAY; (M199)PID P38 MK2 PATHWAY; (M1718)SIG IL4RECEPTOR IN B LYPHOCYTES	(ko05219)Bladder cancer; (hsa05219)Bladder cancer; (ko05213)Endometrial cancer	(hsa)MAPK (ERK1/2) signaling; (M00687)MAPK (ERK1/2) signaling		(M5923)HALLMARK PI3K AKT MTOR SIGNALING; (M5921)HALLMARK COMPLEMENT; (M5932)HALLMARK INFLAMMATORY RESPONSE	(M89)BIOCARTA CDK5 PATHWAY; (M668)BIOCARTA BARR MAPK PATHWAY; (M17681)BIOCARTA IL3 PATHWAY
Oncogene	PTPN11	5781	BPTP3|CFC|JMML|METCDS|NS1|PTP-1D|PTP2C|SH-PTP2|SH-PTP3|SHP2	protein tyrosine phosphatase non-receptor type 11	The protein encoded by this gene is a member of the protein tyrosine phosphatase (PTP) family. PTPs are known to be signaling molecules that regulate a variety of cellular processes including cell growth, differentiation, mitotic cycle, and oncogenic transformation. This PTP contains two tandem Src homology-2 domains, which function as phospho-tyrosine binding domains and mediate the interaction …	chr12:112418915-112509918	GO:0051463 negative regulation of cortisol secretion;GO:0061582 intestinal epithelial cell migration;GO:2000832 negative regulation of steroid hormone secretion	[GO:0003674] molecular_function; [GO:0016791] phosphatase activity; [GO:0008150] biological_process; [GO:0006464] cellular protein modification process; [GO:0006810] transport; [GO:0055085] transmembrane transport; [GO:0005575] cellular_component; [GO:0005622] intracellular; [GO:0043226] organelle; [GO:0005634] nucleus; [GO:0005737] cytoplasm; [GO:0040011] locomotion; [GO:0002376] immune system p…	GO:0005739 mitochondrion;GO:0005654 nucleoplasm;GO:0005829 cytosol	GO:0004726 non-membrane spanning protein tyrosine phosphatase activity;GO:0031748 D1 dopamine receptor binding;GO:0043560 insulin receptor substrate binding		Predicted intracellular proteins; Disease related genes; ENZYME proteins:Hydrolases; Cancer-related genes:Mutational cancer driver genes; Enzymes; Potential drug targets; RAS pathway related proteins; Cancer-related genes:Mutated cancer genes	[IPR000242] PTP type protein phosphatase; [IPR000980] SH2 domain; [IPR029021] Protein-tyrosine phosphatase-like; [IPR036860] SH2 domain superfamily; [IPR000387] Tyrosine specific protein phosphatases domain; [IPR003595] Protein-tyrosine phosphatase, catalytic; [IPR012152] Protein-tyrosine phosphatase, non-receptor type-6, -11; [IPR016130] Protein-tyrosine phosphatase, active site	Nucleoli (reliability']); Additional: Actin filaments;Cytosol;Nucleoplasm					yes			MP:0005370 liver/biliary system phenotype; MP:0005385 cardiovascular system phenotype; MP:0010768 mortality/aging; MP:0005369 muscle phenotype; MP:0005376 homeostasis/metabolism phenotype; MP:0005384 cellular phenotype; MP:0005378 growth/size/body region phenotype; MP:0005386 behavior/neurological phenotype; MP:0005381 digestive/alimentary phenotype; MP:0005387 immune system phenotype; MP:0002006…	[ORPHA:86834] Juvenile myelomonocytic leukemia; [ORPHA:2499] Metachondromatosis; [ORPHA:648] Noonan Syndrome; [ORPHA:500] Noonan syndrome with multiple lentigines	OMIM ID:176876 Protein-tyrosine phosphatase, nonreceptor-type, 11	LEOPARD syndrome 1; Rasopathy; Metachondromatosis; not specified; Noonan syndrome 1; Noonan syndrome; Noonan syndrome and Noonan-related syndrome; Acute myeloid leukemia; Neoplasm of brain; Chronic lymphocytic leukemia; Neuroblastoma; Juvenile myelomonocytic leukemia; Noonan syndrome type 1; Noonan syndrome 3; Splenomegaly; Telecanthus; Anemia; Lymphadenitis; Cardiovascular phenotype; Noonan synd…	Arterial Pressure;Attention Deficit Disorder with Hyperactivity;Blood Pressure;Carotid Arteries;Hypertension;Lipids;Triglycerides	Cleft Lip;Cleft Palate;Platelet Count	[151100] LEOPARD syndrome type 1; [163950] NOONAN SYNDROME 1	Acute myeloid leukemia: likely pathogenic,pathogenic; Adenocarcinoma of stomach: likely pathogenic,other,pathogenic; Astrocytoma: likely pathogenic,pathogenic; Cardiovascular phenotype: pathogenic; Chronic lymphocytic leukemia: likely pathogenic,pathogenic; Clinvar: phenotype not specified: likely pathogenic,other,pathogenic,uncertain significance; Early t cell progenitor acute lymphoblastic leuk…	HP:0005655:Multiple digital exostoses; HP:0010463:Aplasia of the ovary; HP:0000917:Superior pectus carinatum; HP:0100697:Neurofibrosarcoma; HP:0000915:Pectus excavatum of inferior sternum; HP:0001709:Third degree atrioventricular block; HP:0008357:Reduced factor XIII activity; HP:0004841:Reduced factor XII activity; HP:0012569:Delayed menarche; HP:0100769:Synovitis; HP:0012209:Juvenile myelomonoc…	Dodecyltrimethylammonium	Abnormality of skeletal maturation; Abnormality of the somatic nervous system; Congenital insufficiency of pulmonary valve; Congenital stenosis of pulmonary valve; HEART DISPLACEMENT; Multiple Lentigines/LEOPARD syndrome; Multiple digital exostoses; Refractive amblyopia; Aleutian Mink Disease; B lymphoblastic leukemia lymphoma, no ICD-O subtype; Cleft leaflet of mitral valve; Hemorrhagic enteriti…	424	777	[{"UniProt":"Q06124","EnsemblGene":["ENSG00000179295"],"SwissProt":["PTN11_HUMAN"]}]		Distribution: Detected in all; Specificity: Low tissue specificity	antibody: Moderate to strong cytoplasmic positivity was observed in most normal tissues. Additional nuclear staining was observed in respiratory epithelia, thyroid and gall bladder.; General cytoplasmic expression.	Antibody: Malignant cells displayed moderate to strong cytoplasmic positivity. A majority of renal and pancreatic cancers were weakly stained or negative.	(M135)PID IL5 PATHWAY; (M182)PID IL3 PATHWAY; (M226)PID VEGFR1 PATHWAY	(ko05211)Renal cell carcinoma; (ko05120)Epithelial cell signaling in Helicobacter pylori infection; (hsa05120)Epithelial cell signaling in Helicobacter pylori infection			(M5897)HALLMARK IL6 JAK STAT3 SIGNALING; (M5923)HALLMARK PI3K AKT MTOR SIGNALING	(M2623)BIOCARTA IGF1 PATHWAY; (M5489)BIOCARTA IL6 PATHWAY; (M765)BIOCARTA INSULIN PATHWAY
Oncogene	MIR20B	574032	MIRN20B|hsa-mir-20b|mir-20b	microRNA 20b	microRNAs (miRNAs) are short (20-24 nt) non-coding RNAs that are involved in post-transcriptional regulation of gene expression in multicellular organisms by affecting both the stability and translation of mRNAs. miRNAs are transcribed by RNA polymerase II as part of capped and polyadenylated primary transcripts (pri-miRNAs) that can be either protein-coding or non-coding. The primary transcript …	chrX:134169877-134169809	GO:2000774 positive regulation of cellular senescence;GO:0090343 positive regulation of cell aging;GO:1905563 negative regulation of vascular endothelial cell proliferation	[GO:0005575] cellular_component; [GO:0005576] extracellular region; [GO:0005615] extracellular space; [GO:0003674] molecular_function; [GO:0003723] RNA binding; [GO:0003729] mRNA binding; [GO:0008150] biological_process; [GO:0008283] cell population proliferation; [GO:0043226] organelle; [GO:0006950] response to stress; [GO:0007568] aging; [GO:0048856] anatomical structure development; [GO:004864…	GO:1903561 extracellular vesicle;GO:0043230 extracellular organelle;GO:0005615 extracellular space	GO:1903231 mRNA binding involved in posttranscriptional gene silencing;GO:0003729 mRNA binding;GO:0003723 RNA binding														OMIM ID:300950 Micro rna 20b								Fetal Hypoxia; Nonproliferative diabetic retinopathy; Hyperoxaluria; Hypertrophic disorder of skin, unspecified; Viral myocarditis; Marinesco-Sjogren syndrome; Invasive Carcinoma; Latent Tuberculosis; Kidney Calculi; PIGMENTARY DISORDER, RETICULATE, WITH SYSTEMIC MANIFESTATIONS; Myocardial Reperfusion Injury; Nephrolithiasis; Coinfection; Polycystic Kidney, Autosomal Dominant; Metastatic malignan…	38	53
Oncogene	PRKCI	5584	DXS1179E|PKCI|nPKC-iota	protein kinase C iota	This gene encodes a member of the protein kinase C (PKC) family of serine/threonine protein kinases. The PKC family comprises at least eight members, which are differentially expressed and are involved in a wide variety of cellular processes. This protein kinase is calcium-independent and phospholipid-dependent. It is not activated by phorbolesters or diacylglycerol. This kinase can be recruited …	chr3:170222424-170305981	GO:0034351 negative regulation of glial cell apoptotic process;GO:0034350 regulation of glial cell apoptotic process;GO:0034349 glial cell apoptotic process	[GO:0003674] molecular_function; [GO:0043167] ion binding; [GO:0008150] biological_process; [GO:0006464] cellular protein modification process; [GO:0007165] signal transduction; [GO:0016301] kinase activity; [GO:0006810] transport; [GO:0055085] transmembrane transport; [GO:0005575] cellular_component; [GO:0005622] intracellular; [GO:0043226] organelle; [GO:0005634] nucleus; [GO:0005737] cytoplasm…	GO:0043220 Schmidt-Lanterman incisure;GO:0043218 compact myelin;GO:0043209 myelin sheath	GO:0004697 protein kinase C activity;GO:0004698 calcium-dependent protein kinase C activity;GO:0009931 calcium-dependent protein serine/threonine kinase activity	AGC Ser/Thr protein kinase family	Predicted intracellular proteins; Cancer-related genes:Candidate cancer biomarkers; Kinases:AGC Ser/Thr protein kinases; Enzymes; ENZYME proteins:Transferases	[IPR000270] PB1 domain; [IPR000719] Protein kinase domain; [IPR000961] AGC-kinase, C-terminal; [IPR002219] Protein kinase C-like, phorbol ester/diacylglycerol-binding domain; [IPR008271] Serine/threonine-protein kinase, active site; [IPR011009] Protein kinase-like domain superfamily; [IPR012233] Protein kinase C; [IPR017441] Protein kinase, ATP binding site; [IPR017892] Protein kinase, C-terminal…	Cytosol (reliability']); Additional: Cytokinetic bridge;Microtubules						principal1		MP:0005367 renal/urinary system phenotype; MP:0005370 liver/biliary system phenotype; MP:0005385 cardiovascular system phenotype; MP:0010768 mortality/aging; MP:0005369 muscle phenotype; MP:0005376 homeostasis/metabolism phenotype; MP:0005384 cellular phenotype; MP:0005378 growth/size/body region phenotype; MP:0005386 behavior/neurological phenotype; MP:0005387 immune system phenotype; MP:0003631…		OMIM ID:600539 Protein kinase c, iota form		Platelet Function Tests	Bone Density;Prostatic Neoplasms;S-(3-hydroxypropyl)cysteine N-acetate;Smoking				Bisindolylmaleimide I; Fostamatinib	Abdominal obesity metabolic syndrome; recurrent muscle twitches (symptom); Behavioral tic; Serous Tubal Intraepithelial Carcinoma; Tic disorder; Malignant Meningioma; Childhood Alveolar Rhabdomyosarcoma; Apraxia, Developmental Verbal; Adult Angiosarcoma; Childhood Angiosarcoma; Alveolar rhabdomyosarcoma; Ovarian Serous Adenocarcinoma; Extrapulmonary Small Cell Carcinoma; Hemangiosarcoma; Alcohol …	109	251	[{"UniProt":"P41743","EnsemblGene":["ENSG00000163558"],"EnsemblTrans":[["ENST00000295797","ENSP00000295797","principal1"]],"RefSeq":[["NM_002740","NP_002731","REVIEWED"]],"UCSC":["uc003fgs.3"],"SwissProt":["KPCI_HUMAN"]}]		Distribution: Detected in all; Specificity: Low tissue specificity	Cytoplasmic expression in most tissues.; antibody: Weak to moderate cytoplasmic staining was observed in several normal tissues. The gastric mucosa showed strong cytoplasmic positivity while epididymis and fallopian tube showed strong cilia staining. Liver, ovary, myocytes, cells in CNS and lymphoid tissue were generally negative.	Antibody: Several cancers displayed weak to moderate cytoplasmic positivity while ovarian cancers showed moderate to strong staining. Gliomas, lymphomas, melanomas, renal and liver cancers were generally negative.	(M247)PID INSULIN GLUCOSE PATHWAY; (M193)PID NEPHRIN NEPH1 PATHWAY; (M110)PID IL1 PATHWAY	(hsa04611)Platelet activation; (ko04910)Insulin signaling pathway; (hsa04910)Insulin signaling pathway
Oncogene	PPP2R1A	5518	MRD36|PP2A-Aalpha|PP2AA|PP2AAALPHA|PR65A	protein phosphatase 2 scaffold subunit Aalpha	This gene encodes a constant regulatory subunit of protein phosphatase 2. Protein phosphatase 2 is one of the four major Ser/Thr phosphatases, and it is implicated in the negative control of cell growth and division. It consists of a common heteromeric core enzyme, which is composed of a catalytic subunit and a constant regulatory subunit, that associates with a variety of regulatory subunits. Th…	chr19:52190052-52229518	GO:0051232 meiotic spindle elongation;GO:1903537 meiotic cell cycle process involved in oocyte maturation;GO:1903538 regulation of meiotic cell cycle process involved in oocyte maturation	[GO:0003674] molecular_function; [GO:0008150] biological_process; [GO:0034641] cellular nitrogen compound metabolic process; [GO:0005575] cellular_component; [GO:0005622] intracellular; [GO:0043226] organelle; [GO:0005634] nucleus; [GO:0005737] cytoplasm; [GO:0005886] plasma membrane; [GO:0008219] cell death; [GO:0005739] mitochondrion; [GO:0005829] cytosol; [GO:0005694] chromosome; [GO:0007059] …	GO:0000159 protein phosphatase type 2A complex;GO:0008287 protein serine/threonine phosphatase complex;GO:1903293 phosphatase complex	GO:1990405 protein antigen binding;GO:0004722 protein serine/threonine phosphatase activity;GO:0019888 protein phosphatase regulator activity		Disease related genes; Cancer-related genes:Mutational cancer driver genes; Predicted intracellular proteins; Cancer-related genes:Mutated cancer genes	[IPR000357] HEAT repeat; [IPR011989] Armadillo-like helical; [IPR016024] Armadillo-type fold; [IPR021133] HEAT, type 2; [IPR031090] Serine/threonine-protein phosphatase 2A subunit A, metazoa	Cytosol (reliability'])					yes	principal1		MP:0010768 mortality/aging; MP:0005376 homeostasis/metabolism phenotype; MP:0005378 growth/size/body region phenotype; MP:0005386 behavior/neurological phenotype; MP:0002006 neoplasm; MP:0005388 respiratory system phenotype	[ORPHA:457284] Microcephaly-corpus callosum hypoplasia-intellectual disability-facial dysmorphism syndrome	OMIM ID:605983 Protein phosphatase 2, structural/regulatory subunit a, alpha	Uterine Carcinosarcoma; Adenocarcinoma of prostate; Malignant neoplasm of body of uterus; Adenocarcinoma of stomach; Ovarian Serous Cystadenocarcinoma; Squamous cell carcinoma of the head and neck; Neoplasm of the large intestine; Neoplasm of the breast; Lung adenocarcinoma; Mental retardation, autosomal dominant 36; Microcephaly; Impaired use of nonverbal behaviors; Synophrys; Generalized hypoto…			[616579] Intellectual disability	Adenocarcinoma of prostate: likely pathogenic; Adenocarcinoma of stomach: likely pathogenic; Brachydactyly: pathogenic; Clinvar: phenotype not specified: likely pathogenic,pathogenic; Lung adenocarcinoma: likely pathogenic; Mental retardation, autosomal dominant 36: likely pathogenic,pathogenic; Malignant neoplasm of body of uterus: likely pathogenic,pathogenic; Neoplasm of the breast: likely pat…	HP:0009179:Deviation of the 5th finger; HP:0010721:Abnormal hair whorl; HP:0000315:Abnormality of the orbital region; HP:0000297:Facial hypotonia; HP:0005487:Prominent metopic ridge; HP:0010055:Broad hallux; HP:0001357:Plagiocephaly; HP:0010804:Tented upper lip vermilion; HP:0002194:Delayed gross motor development; HP:0000194:Open mouth; HP:0001382:Joint hypermobility; HP:0000324:Facial asymmetry…	2,6,8-Trimethyl-3-Amino-9-Benzyl-9-Methoxynonanoic Acid; (2S,3S,4E,6E,8S,9S)-3-amino-9-methoxy-2,6,8-trimethyl-10-phenyldeca-4,6-dienoic acid	Clinodactyly of the thumb; MENTAL RETARDATION, AUTOSOMAL DOMINANT 36; Deviation of the 5th finger; Abnormal hair whorl; Abnormality of the orbital region; hereditary Wilms tumor; Impaired use of nonverbal behaviors; Breast Fibrocystic Change, Proliferative Type; Electrocardiogram change; Serous cystadenocarcinoma ovary; Malignant Uterine Corpus Neoplasm; Facial hypotonia; Aqueductal Stenosis; Pro…	35	264	[{"UniProt":"P30153","EnsemblGene":["ENSG00000105568"],"EnsemblTrans":[["ENST00000322088","ENSP00000324804","principal1"]],"RefSeq":[["NM_014225","NP_055040","REVIEWED"]],"UCSC":["uc002pyp.4"],"SwissProt":["2AAA_HUMAN"]},{"UniProt":"A8K7B7","RefSeq":[["NM_014225","NP_055040","REVIEWED"]],"SwissProt":["A8K7B7_HUMAN"]}]		Distribution: Detected in all; Specificity: Low tissue specificity			(M210)PID IL8 CXCR2 PATHWAY; (M46)PID ATR PATHWAY; (M129)PID PLK1 PATHWAY	(ko04730)Long-term depression; (hsa04730)Long-term depression; (ko04350)TGF-beta signaling pathway
Oncogene	PML	5371	MYL|PP8675|RNF71|TRIM19	PML nuclear body scaffold	The protein encoded by this gene is a member of the tripartite motif (TRIM) family. The TRIM motif includes three zinc-binding domains, a RING, a B-box type 1 and a B-box type 2, and a coiled-coil region. This phosphoprotein localizes to nuclear bodies where it functions as a transcription factor and tumor suppressor. Its expression is cell-cycle related and it regulates the p53 response to oncog…	chr15:73994716-74047827	GO:0007182 common-partner SMAD protein phosphorylation;GO:0030578 PML body organization;GO:1902187 negative regulation of viral release from host cell	[GO:0003674] molecular_function; [GO:0043167] ion binding; [GO:0008150] biological_process; [GO:0008283] cell population proliferation; [GO:0005575] cellular_component; [GO:0005622] intracellular; [GO:0043226] organelle; [GO:0005634] nucleus; [GO:0005737] cytoplasm; [GO:0005783] endoplasmic reticulum; [GO:0031410] cytoplasmic vesicle; [GO:0005768] endosome; [GO:0008219] cell death; [GO:0003677] D…	GO:0042406 extrinsic component of endoplasmic reticulum membrane;GO:0031312 extrinsic component of organelle membrane;GO:0000792 heterochromatin	GO:0140037 sumo-dependent protein binding;GO:0140035 ubiquitination-like modification-dependent protein binding;GO:0032183 SUMO binding		Cancer-related genes:Candidate cancer biomarkers; Disease related genes; Predicted intracellular proteins	[IPR000315] B-box-type zinc finger; [IPR001841] Zinc finger, RING-type; [IPR013083] Zinc finger, RING/FYVE/PHD-type; [IPR017907] Zinc finger, RING-type, conserved site; [IPR021978] Protein of unknown function DUF3583	Nuclear bodies (reliability'])					yes			MP:0010768 mortality/aging; MP:0005376 homeostasis/metabolism phenotype; MP:0005384 cellular phenotype; MP:0005378 growth/size/body region phenotype; MP:0005387 immune system phenotype; MP:0002006 neoplasm; MP:0005397 hematopoietic system phenotype; MP:0005379 endocrine/exocrine gland phenotype	[ORPHA:520] ACUTE PROMYELOCYTIC LEUKEMIA	OMIM ID:102578 Acute promyelocytic leukemia, inducer of		Blood Pressure	Body Height;Myopia, Degenerative;Osteitis Deformans			HP:0025420:Diffuse alveolar hemorrhage; HP:0100608:Metrorrhagia; HP:0030955:Alcoholism; HP:0031245:Productive cough; HP:0030140:Oral cavity bleeding; HP:0031035:Chronic infection; HP:0005521:Disseminated intravascular coagulation; HP:0010280:Stomatitis; HP:0031020:Bone marrow hypercellularity; HP:0011900:Hypofibrinogenemia; HP:0031364:Ecchymosis; HP:0000967:Petechiae; HP:0000225:Gingival bleeding…	Arsenic trioxide	Hypergranular promyelocytic leukemia; Adult Acute Promyelocytic Leukemia with PML-RARA; Hunger Vital Sign; 15q24 Microdeletion; Trisomy 22; Neoplasms, Therapy-Associated; 47, XYY syndrome; Hyperfibrinolysis; Infections, Arenavirus; Treatment related secondary malignancy; Fanconi-Bickel Syndrome; Disease due to Papilloma virus; Transformation to acute myeloid leukaemia; Metrorrhagia; Productive Co…	347	585	[{"UniProt":"P29590","EnsemblGene":["ENSG00000140464"],"SwissProt":["PML_HUMAN"]}]		Distribution: Detected in all; Specificity: Low tissue specificity	antibody: Most normal tissues showed moderate to strong nuclear staining. Glial cells and lymphoid tissues were weakly stained or negative.; Nuclear expression in most tissues.	Antibody: Weak to moderate nuclear and/or cytoplasmic staining was observed in most cancers. Several urothelial and renal cancers showed strong nuclear staining.	(M139)PID MYC PATHWAY; (M256)PID TAP63 PATHWAY; (M286)PID TGFBR PATHWAY	(ko05221)Acute myeloid leukemia; (hsa05221)Acute myeloid leukemia; (hsa04120)Ubiquitin mediated proteolysis			(M5919)HALLMARK HEDGEHOG SIGNALING; (M5901)HALLMARK G2M CHECKPOINT; (M5913)HALLMARK INTERFERON GAMMA RESPONSE	(M4891)BIOCARTA PML PATHWAY
Oncogene	PLAG1	5324	PSA|SGPA|SRS4|ZNF912	PLAG1 zinc finger	Pleomorphic adenoma gene 1 encodes a zinc finger protein with 2 putative nuclear localization signals. PLAG1, which is developmentally regulated, has been shown to be consistently rearranged in pleomorphic adenomas of the salivary glands. PLAG1 is activated by the reciprocal chromosomal translocations involving 8q12 in a subset of salivary gland pleomorphic adenomas. Three transcript variants enc…	chr8:56211327-56160909	GO:0060736 prostate gland growth;GO:0060252 positive regulation of glial cell proliferation;GO:0060251 regulation of glial cell proliferation	[GO:0003674] molecular_function; [GO:0005575] cellular_component; [GO:0005622] intracellular; [GO:0043226] organelle; [GO:0005634] nucleus; [GO:0005654] nucleoplasm; [GO:0043167] ion binding; [GO:0005737] cytoplasm; [GO:0005829] cytosol; [GO:0003677] DNA binding; [GO:0005856] cytoskeleton; [GO:0005815] microtubule organizing center; [GO:0008150] biological_process; [GO:0048856] anatomical structu…	GO:0016607 nuclear speck;GO:0005813 centrosome;GO:0005815 microtubule organizing center	GO:0001228 DNA-binding transcription activator activity, RNA polymerase II-specific;GO:0000978 RNA polymerase II proximal promoter sequence-specific DNA binding;GO:0000987 proximal promoter sequence-specific DNA binding		Predicted intracellular proteins; Disease related genes; Transcription factors:Zinc-coordinating DNA-binding domains; Cancer-related genes	[IPR013087] Zinc finger C2H2-type; [IPR036236] Zinc finger C2H2 superfamily; [IPR027765] Zinc finger protein PLAG1/PLAGL2	Nuclear speckles;Nucleoplasm (reliability']); Additional: Centrosome;Cytosol								MP:0005378 growth/size/body region phenotype; MP:0005386 behavior/neurological phenotype; MP:0005389 reproductive system phenotype; MP:0005391 vision/eye phenotype; MP:0005377 hearing/vestibular/ear phenotype; MP:0005379 endocrine/exocrine gland phenotype; MP:0005380 embryo phenotype; MP:0005382 craniofacial phenotype	[ORPHA:454821] Pleomorphic salivary gland adenoma	OMIM ID:603026 Plag1 zinc finger protein	Russell-Silver syndrome; SILVER-RUSSELL SYNDROME 4	Vitamin B 12	Agranulocytosis;Body Height;Body Mass Index;Hip;Thyroid Hormones		Russell-silver syndrome: pathogenic	HP:0100684:Salivary gland neoplasm; HP:0001428:Somatic mutation; HP:0000006:Autosomal dominant inheritance		Flank Mass; Lipoblastomatosis; Malignant Mixed Tumor; Radiolabeled somatostatin analog study; Pleomorphic adenoma of lacrimal gland; Retroperitoneal mass; EAR WAX, WET/DRY; Disorder of soft tissue; Inguinal pain; Advanced Prostate Carcinoma; Castration-Sensitive Prostate Carcinoma; Leiomyosarcoma, Epithelioid; Blood in stool; Skin appendage adenoma; Infarction of spinal cord; Leiomyosarcoma, Myxo…	59	80	[{"UniProt":"Q6DJT9","EnsemblGene":["ENSG00000181690"],"SwissProt":["PLAG1_HUMAN"]},{"UniProt":"A0A024R7Z0","RefSeq":[["NM_001114634","NP_001108106","REVIEWED"],["NM_002655","NP_002646","REVIEWED"],["XM_017013576","XP_016869065","MODEL"]],"SwissProt":["A0A024R7Z0_HUMAN"]}]		Distribution: Detected in all; Specificity: Low tissue specificity							(M5956)HALLMARK KRAS SIGNALING DN
Oncogene	PIM1	5292	PIM	Pim-1 proto-oncogene, serine/threonine kinase	The protein encoded by this gene belongs to the Ser/Thr protein kinase family, and PIM subfamily. This gene is expressed primarily in B-lymphoid and myeloid cell lines, and is overexpressed in hematopoietic malignancies and in prostate cancer. It plays a role in signal transduction in blood cells, contributing to both cell proliferation and survival, and thus provides a selective advantage in tum…	chr6:37170152-37175428	GO:1905062 positive regulation of cardioblast proliferation;GO:2000138 positive regulation of cell proliferation involved in heart morphogenesis;GO:0003263 cardioblast proliferation	[GO:0003674] molecular_function; [GO:0043167] ion binding; [GO:0008150] biological_process; [GO:0006464] cellular protein modification process; [GO:0016301] kinase activity; [GO:0008219] cell death; [GO:0048856] anatomical structure development; [GO:0008283] cell population proliferation; [GO:0040007] growth; [GO:0005575] cellular_component; [GO:0005737] cytoplasm; [GO:0005622] intracellular; [GO…	GO:0005730 nucleolus;GO:0005654 nucleoplasm;GO:0005829 cytosol	GO:0043024 ribosomal small subunit binding;GO:0030145 manganese ion binding;GO:0043021 ribonucleoprotein complex binding	CAMK Ser/Thr protein kinase family	Predicted intracellular proteins; Cancer-related genes:Candidate cancer biomarkers; Enzymes; ENZYME proteins:Transferases; Kinases:CAMK Ser/Thr protein kinases	[IPR000719] Protein kinase domain; [IPR008271] Serine/threonine-protein kinase, active site; [IPR011009] Protein kinase-like domain superfamily; [IPR017348] Serine/threonine-protein kinase pim-1/2/3; [IPR017441] Protein kinase, ATP binding site	Cytosol (reliability']); Additional: Nucleoli								MP:0005378 growth/size/body region phenotype; MP:0005387 immune system phenotype; MP:0002006 neoplasm; MP:0005397 hematopoietic system phenotype; MP:0005379 endocrine/exocrine gland phenotype		OMIM ID:164960 Oncogene pim 1		Child Development Disorders, Pervasive;E-Selectin;Platelet Function Tests	Bipolar Disorder				3,4-Dihydroxy-1-Methylquinolin-2(1h)-One; Staurosporine; LY-294002; Imidazole; (3e)-3-[(4-Hydroxyphenyl)Imino]-1h-Indol-2(3h)-One; Bisindolylmaleimide I; Quercetin; Phosphoaminophosphonic Acid-Adenylate Ester; Dexfosfoserine; S,S-(2-Hydroxyethyl)Thiocysteine; IMIDAZOPYRIDAZIN 1; 4-(4-hydroxy-3-methylphenyl)-6-phenylpyrimidin-2(5H)-one; (4R)-7,8-dichloro-1',9-dimethyl-1-oxo-1,2,4,9-tetrahydrospiro…	Pyelonephritis acute necrotizing; viral leukemogenesis; Persistent lymphocytosis; Trisomy 15; Indolence; Myxoid chondrosarcoma; Primary cutaneous marginal zone B-cell lymphoma; RETINITIS PIGMENTOSA 9; Congenital hernia of foramen of Morgagni; Thyroid Lymphoma; Congenital hernia of foramen of Bochdalek; Primary Cutaneous Diffuse Large B-Cell Lymphoma, Leg Type; Adult Diffuse Large Cell Lymphoma; C…	203	247	[{"UniProt":"P11309","EnsemblGene":["ENSG00000137193"],"SwissProt":["PIM1_HUMAN"]},{"UniProt":"A0A024RD25","RefSeq":[["NM_002648","NP_002639","REVIEWED"]],"SwissProt":["A0A024RD25_HUMAN"]}]	tongue	Distribution: Detected in all; Specificity: Low tissue specificity	antibody: A majority of normal tissues were negative. Weak cytoplasmic immunoreactivity was observed in most glandular epithelia.; Cytoplasmic expression in several tissues.	Antibody: A majority of cancer cells were negative. Weak cytoplasmic staining was found in some urothelial and pancreatic cancers.	(M135)PID IL5 PATHWAY; (M182)PID IL3 PATHWAY; (M22)PID GMCSF PATHWAY	(ko05221)Acute myeloid leukemia; (hsa05221)Acute myeloid leukemia; (ko04933)AGE-RAGE signaling pathway in diabetic complications			(M5897)HALLMARK IL6 JAK STAT3 SIGNALING; (M5947)HALLMARK IL2 STAT5 SIGNALING; (M5891)HALLMARK HYPOXIA
Oncogene	NTRK1	4914	MTC|TRK|TRK1|TRKA|Trk-A|p140-TrkA	neurotrophic receptor tyrosine kinase 1	This gene encodes a member of the neurotrophic tyrosine kinase receptor (NTKR) family. This kinase is a membrane-bound receptor that, upon neurotrophin binding, phosphorylates itself and members of the MAPK pathway. The presence of this kinase leads to cell differentiation and may play a role in specifying sensory neuron subtypes. Mutations in this gene have been associated with congenital insens…	chr1:156815750-156881850	GO:0061366 behavioral response to chemical pain;GO:0061368 behavioral response to formalin induced pain;GO:0021553 olfactory nerve development	[GO:0003674] molecular_function; [GO:0043167] ion binding; [GO:0005575] cellular_component; [GO:0008150] biological_process; [GO:0006464] cellular protein modification process; [GO:0005886] plasma membrane; [GO:0016301] kinase activity; [GO:0007165] signal transduction; [GO:0008219] cell death; [GO:0005737] cytoplasm; [GO:0005622] intracellular; [GO:0043226] organelle; [GO:0031410] cytoplasmic ve…	GO:0055038 recycling endosome membrane;GO:0031902 late endosome membrane;GO:0031901 early endosome membrane	GO:0005166 neurotrophin p75 receptor binding;GO:0010465 nerve growth factor receptor activity;GO:0005030 neurotrophin receptor activity	Tyr protein kinase family	FDA approved drug targets:Small molecule drugs; Disease related genes; Cancer-related genes:Candidate cancer biomarkers; Enzymes; Kinases:Tyr protein kinases; ENZYME proteins:Transferases; RAS pathway related proteins	[IPR000483] Cysteine-rich flanking region, C-terminal; [IPR000719] Protein kinase domain; [IPR001245] Serine-threonine/tyrosine-protein kinase, catalytic domain; [IPR001611] Leucine-rich repeat; [IPR002011] Tyrosine-protein kinase, receptor class II, conserved site; [IPR007110] Immunoglobulin-like domain; [IPR008266] Tyrosine-protein kinase, active site; [IPR011009] Protein kinase-like domain sup…	Cytosol;Vesicles (reliability'])			yes	yes			yes	MP:0010768 mortality/aging; MP:0005369 muscle phenotype; MP:0005378 growth/size/body region phenotype; MP:0005386 behavior/neurological phenotype; MP:0005387 immune system phenotype; MP:0003631 nervous system phenotype; MP:0005391 vision/eye phenotype; MP:0005371 limbs/digits/tail phenotype; MP:0005397 hematopoietic system phenotype; MP:0010771 integument phenotype; MP:0001186 pigmentation phenot…	[ORPHA:146] Differentiated thyroid carcinoma; [ORPHA:99361] Familial medullary thyroid carcinoma; [ORPHA:642] Hereditary sensory and autonomic neuropathy type 4; [ORPHA:64752] Hereditary sensory and autonomic neuropathy type 5	OMIM ID:191315 Neurotrophic tyrosine kinase, receptor, type 1	Hereditary insensitivity to pain with anhidrosis; Absent speech; Global developmental delay; Epileptic encephalopathy; Developmental regression; Muscular hypotonia; Abnormality of the cerebral white matter; Charcot-Marie-Tooth disease; Inborn genetic diseases	Platelet Function Tests	Polychlorinated Biphenyls;Uric Acid	[256800] Congenital insensitivity to pain with anhidrosis	Clinvar: phenotype not specified: likely pathogenic,pathogenic; Hereditary insensitivity to pain with anhidrosis: likely pathogenic,pathogenic; Inborn genetic diseases: likely pathogenic,pathogenic	HP:0007249:Decreased number of small peripheral myelinated nerve fibers; HP:0005307:Postural hypotension with compensatory tachycardia; HP:0002821:Neuropathic arthropathy; HP:0002865:Medullary thyroid carcinoma; HP:0012804:Corneal ulceration; HP:0010829:Impaired temperature sensation; HP:0002661:Painless fractures due to injury; HP:0006121:Acral ulceration; HP:0007460:Autoamputation of digits; HP…	Amitriptyline; Imatinib; Regorafenib; Entrectinib; Fostamatinib; Cenegermin; Larotrectinib	Decreased number of small peripheral myelinated nerve fibers; Stenosis, Pulmonary Vein; Fibrous Hamartoma of Infancy; Fish Melanoma; Hyperplastic gingivitis; Mucosal neuromas; Postural hypotension with compensatory tachycardia; Congenital hemangioma; Hereditary Sensory Radicular Neuropathy; Myofascial Pain Syndromes; Palmar hyperkeratosis; Sarcoma, metastatic; Hereditary Sensory Autonomic Neuropa…	235	364	[{"UniProt":"P04629","EnsemblGene":["ENSG00000198400"],"SwissProt":["NTRK1_HUMAN"]},{"UniProt":"X5DR71","RefSeq":[["NM_001012331","NP_001012331","REVIEWED"]],"UCSC":["uc001fqi.2"],"SwissProt":["X5DR71_HUMAN"]}]		Distribution: Detected in many; Specificity: Group enriched	antibody: A majority of normal tissues displayed moderate cytoplasmic staining, often with a granular pattern and stronger in luminal position. Strongest positivity was observed in skeletal muscle and heart muscle.; Cytoplasmic expression in several tissues, including neuronal cells in CNS.	Antibody: Most cancer cells displayed moderate to strong cytoplasmic immunoreactivity, often with a granular pattern.	(M18895)SA TRKA RECEPTOR; (M271)PID PI3K PLC TRK PATHWAY; (M100)PID SHP2 PATHWAY	(ko05216)Thyroid cancer; (hsa05216)Thyroid cancer; (ko05230)Central carbon metabolism in cancer				(M7825)BIOCARTA ACTINY PATHWAY; (M16811)BIOCARTA ERK5 PATHWAY; (M9134)BIOCARTA TRKA PATHWAY
Oncogene	MYCN	4613	MODED|N-myc|NMYC|ODED|bHLHe37	MYCN proto-oncogene, bHLH transcription factor	This gene is a member of the MYC family and encodes a protein with a basic helix-loop-helix (bHLH) domain. This protein is located in the nucleus and must dimerize with another bHLH protein in order to bind DNA. Amplification of this gene is associated with a variety of tumors, most notably neuroblastomas. Multiple alternatively spliced transcript variants encoding different isoforms have been fo…	chr2:15940550-15947004	GO:1903800 positive regulation of production of miRNAs involved in gene silencing by miRNA;GO:1903798 regulation of production of miRNAs involved in gene silencing by miRNA;GO:2000637 positive regulation of gene silencing by miRNA	[GO:0008150] biological_process; [GO:0034641] cellular nitrogen compound metabolic process; [GO:0009058] biosynthetic process; [GO:0005575] cellular_component; [GO:0003674] molecular_function; [GO:0003700] DNA-binding transcription factor activity; [GO:0005622] intracellular; [GO:0043226] organelle; [GO:0005634] nucleus; [GO:0005654] nucleoplasm; [GO:0005730] nucleolus; [GO:0003677] DNA binding; …	GO:0000790 nuclear chromatin;GO:0005730 nucleolus;GO:0000785 chromatin	GO:0001228 DNA-binding transcription activator activity, RNA polymerase II-specific;GO:0019900 kinase binding;GO:0046983 protein dimerization activity		Transcription factors:Basic domains; Disease related genes; Predicted intracellular proteins; Cancer-related genes:Mutated cancer genes	[IPR002418] Transcription regulator Myc; [IPR011598] Myc-type, basic helix-loop-helix (bHLH) domain; [IPR012682] Transcription regulator Myc, N-terminal; [IPR036638] Helix-loop-helix DNA-binding domain superfamily	Nucleoli (reliability']); Additional: Nucleoplasm						principal1		MP:0005367 renal/urinary system phenotype; MP:0005370 liver/biliary system phenotype; MP:0005385 cardiovascular system phenotype; MP:0010768 mortality/aging; MP:0005369 muscle phenotype; MP:0005376 homeostasis/metabolism phenotype; MP:0005384 cellular phenotype; MP:0005378 growth/size/body region phenotype; MP:0005386 behavior/neurological phenotype; MP:0005381 digestive/alimentary phenotype; MP:…	[ORPHA:391641] Feingold syndrome type 1; [ORPHA:357027] Hereditary retinoblastoma; [ORPHA:635] Neuroblastoma; [ORPHA:357034] Non-hereditary retinoblastoma	OMIM ID:164840 V-myc avian myelocytomatosis viral-related oncogene, neuroblastoma-derived	Feingold syndrome 1; Medulloblastoma; Glioblastoma; Pancreatic adenocarcinoma; Malignant neoplasm of body of uterus; Neuroblastoma; Inborn genetic diseases	Blood Pressure;Blood Proteins;Body Height;Carotid Arteries;Platelet Function Tests;Social Behavior	Carcinoma, Basal Cell;Cleft Lip;Cleft Palate;Electrocardiography;GRN protein, human;HIV-1;Mouth Abnormalities;Peripheral Nervous System Diseases;Reverse Transcriptase Inhibitors;Trypanosoma cruzi	[164280] Feingold syndrome type 1	Clinvar: phenotype not specified: likely pathogenic,pathogenic; Feingold syndrome 1: likely pathogenic,pathogenic; Inborn genetic diseases: pathogenic	HP:0004692:4-5 toe syndactyly; HP:0009161:Aplasia/Hypoplasia of the middle phalanx of the 5th finger; HP:0009568:Aplasia/Hypoplasia of the middle phalanx of the 2nd finger; HP:0000237:Small anterior fontanelle; HP:0011976:Elevated urinary catecholamines; HP:0001748:Polysplenia; HP:0001734:Annular pancreas; HP:0004375:Neoplasm of the nervous system; HP:0000437:Depressed nasal tip; HP:0001747:Acces…		Ganglioneuroblastoma, Nodular; Resectable Neuroblastoma; Unresectable Neuroblastoma; CHARCOT-MARIE-TOOTH DISEASE, TYPE 4D; Congenital neuroblastoma; FEINGOLD SYNDROME 1; Ganglioneuroblastoma, Intermixed; Somatomammotropinoma; Adult Spinal Cord Ependymoma; Ependymoma of spinal cord; Extraocular retinoblastoma; Trilateral Retinoblastoma; 4-5 toe syndactyly; Aplasia/Hypoplasia of the middle phalanx …	348	410	[{"UniProt":"P04198","EnsemblGene":["ENSG00000134323"],"EnsemblTrans":[["ENST00000281043","ENSP00000281043","principal1"]],"RefSeq":[["NM_001293228","NP_001280157","REVIEWED"],["NM_001293231","NP_001280160","REVIEWED"],["NM_001293233","NP_001280162","REVIEWED"],["NM_005378","NP_005369","REVIEWED"],["XM_017004168","XP_016859657"]],"UCSC":["uc002rci.4"],"SwissProt":["MYCN_HUMAN"]},{"UniProt":"A0A1W…		Distribution: Detected in many; Specificity: Tissue enhanced				(ko05202)Transcriptional misregulation in cancer; (hsa05202)Transcriptional misregulation in cancer			(M5953)HALLMARK KRAS SIGNALING UP
Oncogene	MYC	4609	MRTL|MYCC|bHLHe39|c-Myc	MYC proto-oncogene, bHLH transcription factor	This gene is a proto-oncogene and encodes a nuclear phosphoprotein that plays a role in cell cycle progression, apoptosis and cellular transformation. The encoded protein forms a heterodimer with the related transcription factor MAX. This complex binds to the E box DNA consensus sequence and regulates the transcription of specific target genes. Amplification of this gene is frequently observed in…	chr8:127735434-127742951	GO:0090095 regulation of metanephric cap mesenchymal cell proliferation;GO:0090096 positive regulation of metanephric cap mesenchymal cell proliferation;GO:0072185 metanephric cap development	[GO:0008150] biological_process; [GO:0034641] cellular nitrogen compound metabolic process; [GO:0009058] biosynthetic process; [GO:0005575] cellular_component; [GO:0003674] molecular_function; [GO:0003700] DNA-binding transcription factor activity; [GO:0005622] intracellular; [GO:0043226] organelle; [GO:0005634] nucleus; [GO:0005654] nucleoplasm; [GO:0005737] cytoplasm; [GO:0005783] endoplasmic r…	GO:0000790 nuclear chromatin;GO:0005730 nucleolus;GO:0000785 chromatin	GO:0001046 core promoter sequence-specific DNA binding;GO:0001047 core promoter binding;GO:0070888 E-box binding		Transcription factors:Basic domains; Cancer-related genes:Candidate cancer biomarkers; Disease related genes; Predicted intracellular proteins	[IPR002418] Transcription regulator Myc; [IPR012682] Transcription regulator Myc, N-terminal; [IPR003327] Leucine zipper, Myc; [IPR011598] Myc-type, basic helix-loop-helix (bHLH) domain; [IPR036638] Helix-loop-helix DNA-binding domain superfamily	Nucleoplasm (reliability'])				yes			yes	MP:0005367 renal/urinary system phenotype; MP:0005370 liver/biliary system phenotype; MP:0005385 cardiovascular system phenotype; MP:0010768 mortality/aging; MP:0005369 muscle phenotype; MP:0005376 homeostasis/metabolism phenotype; MP:0005384 cellular phenotype; MP:0005378 growth/size/body region phenotype; MP:0005386 behavior/neurological phenotype; MP:0005381 digestive/alimentary phenotype; MP:…	[ORPHA:543] BURKITT LYMPHOMA; [ORPHA:480541] High grade B-cell lymphoma with MYC and/ or BCL2 and/or BCL6 rearrangement; [ORPHA:99861] Precursor T-cell acute lymphoblastic leukemia	OMIM ID:190080 Myc protooncogene, bhlh transcription factor	Malignant melanoma of skin; Carcinoma of esophagus; Neuroblastoma; Lung adenocarcinoma; Non-Hodgkin lymphoma; Neoplasm; Burkitt lymphoma	Erythrocyte Count;Pancreatic Neoplasms			Burkitt lymphoma: likely pathogenic,pathogenic; Carcinoma of esophagus: likely pathogenic; Lung adenocarcinoma: likely pathogenic; Malignant melanoma of skin: likely pathogenic; Neoplasm: likely pathogenic,pathogenic; Neuroblastoma: likely pathogenic; Non-hodgkin lymphoma: likely pathogenic	HP:0100649:Neoplasm of the oral cavity; HP:0002733:Abnormality of the lymph nodes; HP:0000137:Abnormality of the ovary; HP:0030080:Burkitt lymphoma; HP:0001732:Abnormality of the pancreas; HP:0005561:Abnormality of bone marrow cell morphology; HP:0005407:Decreased proportion of CD4-positive T cells; HP:0001743:Abnormality of the spleen; HP:0002149:Hyperuricemia; HP:0025435:Increased lactate dehyd…	Acetylsalicylic acid; Nadroparin	Carcinoma in situ of anus; Classical Burkitt Lymphoma; Gastric Burkitt Lymphoma; Indolent multiple myeloma; Large Cell/Anaplastic Medulloblastoma; Lymphomas in children; Osteosarcoma Arising in Paget Disease of Bone; Progonoma; Atypical Burkitt's lymphoma; Blastoid Variant Mantle Cell Lymphoma; Burkitt-Like Lymphoma with 11q Aberration; Childhood Thyroid Gland Carcinoma; Dissociative Identity Dis…	1844	2130	[{"UniProt":"P01106","EnsemblGene":["ENSG00000136997"],"SwissProt":["MYC_HUMAN"]}]	bone_marrow	Distribution: Detected in all; Specificity: Low tissue specificity	antibody: Weak to moderate nuclear positivity was observed in most lymphoid and glandular cells.; Ubiquitous nuclear and nucleolar expression in essentially all cells except in glial- and stroma cells.	Antibody: Moderate nuclear and sometimes cytoplasmic positivity was observed in most cancers. Skin, urothelial, stomach and pancreatic cancers were mainly weak or negative.	(M139)PID MYC PATHWAY; (M234)PID IL2 STAT5 PATHWAY; (M45)PID CD40 PATHWAY	(ko05216)Thyroid cancer; (hsa05216)Thyroid cancer; (ko05219)Bladder cancer			(M5895)HALLMARK WNT BETA CATENIN SIGNALING; (M5928)HALLMARK MYC TARGETS V2; (M5942)HALLMARK UV RESPONSE DN	(M22015)BIOCARTA TERT PATHWAY; (M4388)BIOCARTA CDMAC PATHWAY; (M10401)BIOCARTA TEL PATHWAY
Oncogene	MYB	4602	Cmyb|c-myb|c-myb_CDS|efg	MYB proto-oncogene, transcription factor	This gene encodes a protein with three HTH DNA-binding domains that functions as a transcription regulator. This protein plays an essential role in the regulation of hematopoiesis. This gene may be aberrently expressed or rearranged or undergo translocation in leukemias and lymphomas, and is considered to be an oncogene. Alternative splicing results in multiple transcript variants. [provided by R…	chr6:135181308-135219172	GO:1904897 regulation of hepatic stellate cell proliferation;GO:1904899 positive regulation of hepatic stellate cell proliferation;GO:1990922 hepatic stellate cell proliferation	[GO:0003674] molecular_function; [GO:0003677] DNA binding; [GO:0008150] biological_process; [GO:0034641] cellular nitrogen compound metabolic process; [GO:0009058] biosynthetic process; [GO:0005575] cellular_component; [GO:0005622] intracellular; [GO:0043226] organelle; [GO:0005634] nucleus; [GO:0005654] nucleoplasm; [GO:0005737] cytoplasm; [GO:0005829] cytosol; [GO:0003700] DNA-binding transcrip…	GO:0016363 nuclear matrix;GO:0034399 nuclear periphery;GO:0005654 nucleoplasm	GO:0001228 DNA-binding transcription activator activity, RNA polymerase II-specific;GO:0000978 RNA polymerase II proximal promoter sequence-specific DNA binding;GO:0000987 proximal promoter sequence-specific DNA binding		Transcription factors:Helix-turn-helix domains; Cancer-related genes:Mutational cancer driver genes; Predicted intracellular proteins; Cancer-related genes:Mutated cancer genes	[IPR001005] SANT/Myb domain; [IPR009057] Homeobox-like domain superfamily; [IPR012642] Transcription regulator Wos2-domain; [IPR015395] C-myb, C-terminal; [IPR015495] Myb-like transcription factor; [IPR017930] Myb domain	Nucleoplasm (reliability']); Additional: Cytosol								MP:0005370 liver/biliary system phenotype; MP:0005385 cardiovascular system phenotype; MP:0010768 mortality/aging; MP:0005384 cellular phenotype; MP:0005378 growth/size/body region phenotype; MP:0005387 immune system phenotype; MP:0005389 reproductive system phenotype; MP:0005397 hematopoietic system phenotype; MP:0005379 endocrine/exocrine gland phenotype; MP:0010771 integument phenotype; MP:000…	[ORPHA:86849] Acute basophilic leukemia; [ORPHA:251671] Angiocentric glioma; [ORPHA:99861] Precursor T-cell acute lymphoblastic leukemia	OMIM ID:189990 V-myb avian myeloblastosis viral oncogene homolog		Chlorine;Erythrocyte Count;Erythropoietin;Fetal Hemoglobin	Anemia, Sickle Cell;Cholesterol;Eosinophils;Erythrocyte Indices;Hematocrit;Hemoglobin A2;Hemoglobin E;Hemoglobins;Hodgkin Disease;Hormones;Leukocyte Count;Multiple Sclerosis;Myeloproliferative Disorders;Platelet Count;hemoglobin A1c protein, human					Breast Adenomyoepithelioma; Angiocentric glioma; Desmoplastic trichoepithelioma; Salivary Gland Epithelial Myoepithelial Carcinoma; Acute Basophilic Leukemia; Adult Acute Basophilic Leukemia; Childhood Acute Basophilic Leukemia; Adenoid cystic carcinoma of lacrimal gland; Sweat gland carcinoma; Primary Cutaneous Mucinous Carcinoma; Adenoid cystic breast carcinoma; colon (non-specific) lesion; bas…	219	312	[{"UniProt":"P10242","EnsemblGene":["ENSG00000118513"],"SwissProt":["MYB_HUMAN"]},{"UniProt":"Q708E9","RefSeq":[["NM_005375","NP_005366","REVIEWED"]],"UCSC":["uc003qfc.4"],"SwissProt":["Q708E9_HUMAN"]}]	bone_marrow;testis	Distribution: Detected in many; Specificity: Tissue enriched	antibody: A majority of the normal tissues displayed strong nuclear immunoreactivity, in some cases combined with weak cytoplasmic positivity.; Mainly nuclear expression in several different tissue types, including gastrointestinal tract and lymphoid tissues.	Antibody: Most malignant cells displayed strong nuclear immunoreactivity, in some cases accompanied with weak cytoplasmic staining.	(M143)PID IL2 PI3K PATHWAY; (M288)PID HES HEY PATHWAY; (M28)PID IL4 2PATHWAY	(ko05166)HTLV-I infection; (hsa05166)Human T-cell leukemia virus 1 infection; (ko04151)PI3K-Akt signaling pathway			(M5906)HALLMARK ESTROGEN RESPONSE EARLY; (M5907)HALLMARK ESTROGEN RESPONSE LATE
Oncogene	MIR373	442918	MIRN373|hsa-mir-373|miRNA373|mir-373	microRNA 373	microRNAs (miRNAs) are short (20-24 nt) non-coding RNAs that are involved in post-transcriptional regulation of gene expression in multicellular organisms by affecting both the stability and translation of mRNAs. miRNAs are transcribed by RNA polymerase II as part of capped and polyadenylated primary transcripts (pri-miRNAs) that can be either protein-coding or non-coding. The primary transcript …	chr19:53788705-53788773	GO:1904046 negative regulation of vascular endothelial growth factor production;GO:0010574 regulation of vascular endothelial growth factor production;GO:0010573 vascular endothelial growth factor production	[GO:0003674] molecular_function; [GO:0003723] RNA binding; [GO:0003729] mRNA binding; [GO:0008150] biological_process		GO:1903231 mRNA binding involved in posttranscriptional gene silencing;GO:0003729 mRNA binding;GO:0003723 RNA binding														OMIM ID:611954 Micro rna 373								Fetal Hypoxia; Laryngeal neoplasm; Klatskin Tumor; Adult Germ Cell Tumor; Childhood Germ Cell Tumor; Endometrial Stromal Sarcoma; Oestrogen deficiency; Intestinal Cancer; Adult Teratoma; Childhood Teratoma; Benign melanocytic nevus; Nevus; Malignant Testicular Germ Cell Tumor; Mucinous Adenocarcinoma; Osteoporosis, Postmenopausal; Teratoma; Thyroid Gland Follicular Adenoma; Germ cell tumor; HER2-…	63	70							(ko05206)MicroRNAs in cancer; (hsa05206)MicroRNAs in cancer
Oncogene	MIR372	442917	MIRN372|hsa-mir-372	microRNA 372	microRNAs (miRNAs) are short (20-24 nt) non-coding RNAs that are involved in post-transcriptional regulation of gene expression in multicellular organisms by affecting both the stability and translation of mRNAs. miRNAs are transcribed by RNA polymerase II as part of capped and polyadenylated primary transcripts (pri-miRNAs) that can be either protein-coding or non-coding. The primary transcript …	chr19:53787890-53787956	GO:1904046 negative regulation of vascular endothelial growth factor production;GO:1900087 positive regulation of G1/S transition of mitotic cell cycle;GO:1902808 positive regulation of cell cycle G1/S phase transition			GO:1903231 mRNA binding involved in posttranscriptional gene silencing;GO:0003729 mRNA binding;GO:0003723 RNA binding														OMIM ID:612044 Micro rna 372								LYMPHANGIECTASIA, PULMONARY, CONGENITAL; Spinal Cord Ischemia; Parathyroid Neoplasms; AICARDI-GOUTIERES SYNDROME; Parathyroid Adenoma; Cholecystolithiasis; Endometrial adenocarcinoma; Adult Classical Hodgkin Lymphoma; Cholelithiasis; Cone-Rod Dystrophy 2; Germ cell tumor; Classical Hodgkin's Lymphoma; Stage 0 Gallbladder Cancer AJCC v8; Stage IIA Gallbladder Cancer AJCC v8; Stage IIB Gallbladder …	40	46
Oncogene	MPL	4352	C-MPL|CD110|MPLV|THCYT2|THPOR|TPOR	MPL proto-oncogene, thrombopoietin receptor	In 1990 an oncogene, v-mpl, was identified from the murine myeloproliferative leukemia virus that was capable of immortalizing bone marrow hematopoietic cells from different lineages. In 1992 the human homologue, named, c-mpl, was cloned. Sequence data revealed that c-mpl encoded a protein that was homologous with members of the hematopoietic receptor superfamily. Presence of anti-sense oligodeox…	chr1:43336875-43354466	GO:1990959 eosinophil homeostasis;GO:1990960 basophil homeostasis;GO:0035702 monocyte homeostasis	[GO:0003674] molecular_function; [GO:0005575] cellular_component; [GO:0007165] signal transduction; [GO:0008150] biological_process; [GO:0005886] plasma membrane; [GO:0005737] cytoplasm; [GO:0005622] intracellular; [GO:0043226] organelle; [GO:0005794] Golgi apparatus; [GO:0005634] nucleus; [GO:0005635] nuclear envelope; [GO:0042592] homeostatic process; [GO:0002376] immune system process; [GO:000…	GO:0031965 nuclear membrane;GO:0005635 nuclear envelope;GO:0043025 neuronal cell body	GO:0038164 thrombopoietin receptor activity;GO:0004896 cytokine receptor activity;GO:0004888 transmembrane signaling receptor activity		CD markers; Predicted intracellular proteins; Disease related genes; Cancer-related genes; FDA approved drug targets:Biotech drugs	[IPR003528] Long hematopoietin receptor, single chain, conserved site; [IPR003961] Fibronectin type III; [IPR013783] Immunoglobulin-like fold; [IPR015152] Growth hormone/erythropoietin receptor, ligand binding; [IPR036116] Fibronectin type III superfamily	Plasma membrane (reliability']); Additional: Nuclear membrane			yes	yes			yes	MP:0005376 homeostasis/metabolism phenotype; MP:0005384 cellular phenotype; MP:0005378 growth/size/body region phenotype; MP:0005387 immune system phenotype; MP:0005397 hematopoietic system phenotype	[ORPHA:3319] Congenital amegakaryocytic thrombocytopenia; [ORPHA:3318] Essential thrombocythemia; [ORPHA:71493] Familial thrombocytosis; [ORPHA:397692] Hereditary isolated aplastic anemia; [ORPHA:729] POLYCYTHEMIA VERA; [ORPHA:824] Primary myelofibrosis	OMIM ID:159530 Myeloproliferative leukemia virus oncogene	Congenital amegakaryocytic thrombocytopenia; essential thrombocytemia; Thrombocythemia 1; Myeloproliferative Neoplasm; MPL-Related Disorders; not specified; Thrombocytopenia; Myelofibrosis with myeloid metaplasia; Thrombocythemia 2, somatic; Hematologic neoplasm; Thrombocytosis, benign familial microcytic; Myelofibrosis				Clinvar: phenotype not specified: likely pathogenic,not provided,pathogenic,uncertain significance; Congenital amegakaryocytic thrombocytopenia: likely pathogenic,not provided,pathogenic; Essential thrombocythemia: likely pathogenic,pathogenic; Hematologic neoplasm: likely pathogenic,pathogenic; Myelofibrosis: likely pathogenic,pathogenic; Myelofibrosis with myeloid metaplasia: likely pathogenic,…	HP:0005548:Megakaryocytopenia; HP:0011134:Low-grade fever; HP:0002639:Budd-Chiari syndrome; HP:0030157:Flank pain; HP:0004859:Amegakaryocytic thrombocytopenia; HP:0005513:Increased megakaryocyte count; HP:0004377:Hematological neoplasm; HP:0030242:Portal vein thrombosis; HP:0005506:Chronic myelogenous leukemia; HP:0004417:Intermittent claudication; HP:0011902:Abnormal hemoglobin; HP:0011875:Abnor…	Romiplostim; SB-559448; Eltrombopag; Thrombopoietin; Avatrombopag; Lusutrombopag	Hemorrhagic pneumonia; THROMBOCYTHEMIA 2; THROMBOCYTHEMIA 2, SOMATIC; Thrombocytopenia, cyclic; Chronic idiopathic thrombocytopenic purpura; Thrombocytopenia 3; Inherited predisposition to essential thrombocythemia; Megakaryocytopenia; Post essential thrombocythaemia myelofibrosis; Radial aplasia; Low grade fever; TAFRO syndrome; THROMBOCYTHEMIA 1; Flank Pain; Refractory anemia with ring siderobl…	181	211	[{"UniProt":"P40238","EnsemblGene":["ENSG00000117400"],"SwissProt":["TPOR_HUMAN"]}]		Distribution: Detected in many; Specificity: Tissue enhanced				(ko04630)Jak-STAT signaling pathway; (hsa04630)JAK-STAT signaling pathway; (ko04060)Cytokine-cytokine receptor interaction				(M11520)BIOCARTA TPO PATHWAY
Oncogene	MOS	4342	MSV	MOS proto-oncogene, serine/threonine kinase	MOS is a serine/threonine kinase that activates the MAP kinase cascade through direct phosphorylation of the MAP kinase activator MEK (MAP2K1; MIM 176872) (Prasad et al., 2008 [PubMed 18246541]).[supplied by OMIM, Jul 2009]	chr8:56113982-56112942	GO:0051296 establishment of meiotic spindle orientation;GO:1902103 negative regulation of metaphase/anaphase transition of meiotic cell cycle;GO:1905133 negative regulation of meiotic chromosome separation	[GO:0003674] molecular_function; [GO:0043167] ion binding; [GO:0008150] biological_process; [GO:0006464] cellular protein modification process; [GO:0016301] kinase activity; [GO:0007165] signal transduction; [GO:0051276] chromosome organization; [GO:0005575] cellular_component; [GO:0005737] cytoplasm; [GO:0005622] intracellular; [GO:0005829] cytosol; [GO:0007049] cell cycle; [GO:0000003] reproduc…	GO:0005829 cytosol;GO:0044444 cytoplasmic part;GO:0005737 cytoplasm	GO:0004709 MAP kinase kinase kinase activity;GO:0004674 protein serine/threonine kinase activity;GO:0004672 protein kinase activity	Other	Predicted intracellular proteins; ENZYME proteins:Transferases; Kinases; Enzymes	[IPR000719] Protein kinase domain; [IPR008271] Serine/threonine-protein kinase, active site; [IPR011009] Protein kinase-like domain superfamily; [IPR017441] Protein kinase, ATP binding site							principal1		MP:0005384 cellular phenotype; MP:0005378 growth/size/body region phenotype; MP:0002006 neoplasm; MP:0005389 reproductive system phenotype; MP:0005390 skeleton phenotype; MP:0005379 endocrine/exocrine gland phenotype		OMIM ID:190060 V-mos moloney murine sarcoma viral oncogene homolog			Agranulocytosis;Thyroid Hormones					Dyschezia; Ovarian Teratoma; Asthenia; Pelvic pain female; Bodily Pain; Pelvic Pain; Ichthyosis Bullosa of Siemens; Cancer Pain; Dysmenorrhea; Diffuse Intrinsic Pontine Glioma; Back Pain; IgE-mediated food allergy; Eating Disorders; Fibromyalgia; Neoplasms, Intracranial; Embryonal Carcinoma; Mixed Salivary Gland Tumor; Chronic liver disease; Intestinal metaplasia; Lymphoproliferative Disorders; S…	10	41	[{"UniProt":"P00540","EnsemblGene":["ENSG00000172680"],"EnsemblTrans":[["ENST00000311923","ENSP00000310722","principal1"]],"RefSeq":[["NM_005372","NP_005363","VALIDATED"]],"UCSC":["uc011leb.2"],"SwissProt":["MOS_HUMAN"]}]		Distribution: Detected in single; Specificity: Tissue enriched				(ko04914)Progesterone-mediated oocyte maturation; (hsa04914)Progesterone-mediated oocyte maturation; (ko04114)Oocyte meiosis	(hsa)MAPK (ERK1/2) signaling; (M00687)MAPK (ERK1/2) signaling
Oncogene	MLLT3	4300	AF9|YEATS3	MLLT3 super elongation complex subunit		chr9:20622499-20341669	GO:2000096 positive regulation of Wnt signaling pathway, planar cell polarity pathway;GO:2000035 regulation of stem cell division;GO:2000052 positive regulation of non-canonical Wnt signaling pathway	[GO:0008150] biological_process; [GO:0034641] cellular nitrogen compound metabolic process; [GO:0009058] biosynthetic process; [GO:0005575] cellular_component; [GO:0005622] intracellular; [GO:0043226] organelle; [GO:0005634] nucleus; [GO:0005654] nucleoplasm; [GO:0005737] cytoplasm; [GO:0005829] cytosol; [GO:0003674] molecular_function; [GO:0003677] DNA binding; [GO:0005694] chromosome; [GO:00488…	GO:0008023 transcription elongation factor complex;GO:0044451 nucleoplasm part;GO:0005694 chromosome	GO:0070577 lysine-acetylated histone binding;GO:0140033 acetylation-dependent protein binding;GO:0140030 modification-dependent protein binding		Disease related genes; Cancer-related genes:Mutational cancer driver genes; Predicted intracellular proteins	[IPR005033] YEATS; [IPR038704] YEATS superfamily; [IPR040930] AF-9, ANC1 homology domain	Nucleoplasm (reliability']); Additional: Cytosol								MP:0010768 mortality/aging; MP:0005376 homeostasis/metabolism phenotype; MP:0005378 growth/size/body region phenotype; MP:0005390 skeleton phenotype; MP:0005397 hematopoietic system phenotype; MP:0005380 embryo phenotype	[ORPHA:402017] Acute myeloid leukemia with t9	OMIM ID:159558 Mllt3 super elongation complex subunit		Iron;Platelet Function Tests	Asthma;Forced Expiratory Volume;montelukast					Acute myeloid leukemia, 11q23 abnormalities; Endolymphatic Hydrops; Adult Acute Monocytic Leukemia; Childhood Acute Monocytic Leukemia; Polyradiculoneuropathy, Chronic Inflammatory Demyelinating; M5b Acute differentiated monocytic leukemia; Squamous cell carcinoma of mouth; Acute Megakaryocytic Leukemias; MIXED LINEAGE LEUKEMIA; Neoplasm, Residual; Glomerular Filtration Rate; Developmental delay …	36	91	[{"UniProt":"P42568","EnsemblGene":["ENSG00000171843"],"SwissProt":["AF9_HUMAN"]},{"UniProt":"A0A0S2Z448","RefSeq":[["NM_004529","NP_004520","VALIDATED"]],"SwissProt":["A0A0S2Z448_HUMAN"]}]		Distribution: Detected in all; Specificity: Low tissue specificity	antibody: Nuclear staining of moderate intensity was observed in most normal. Cytoplasmic staining with a granular pattern was observed in hepatocytes, exocrine pancreas and epidydimis. ; General nuclear expression.	Antibody: A majority of malignant tissues displayed moderate nuclear immunoreactivity. A few colorectal-, lung- and renal cancers were strongly stained.		(ko05202)Transcriptional misregulation in cancer; (hsa05202)Transcriptional misregulation in cancer
Oncogene	AFF1	4299	AF4|MLLT2|PBM1	AF4/FMR2 family member 1	This gene encodes a member of the AF4/ lymphoid nuclear protein related to the Fragile X E syndrome (FRAXE) family of proteins, which have been implicated in human childhood lymphoblastic leukemia, fragile chromosome X intellectual disability, and ataxia. It is the prevalent mixed-lineage leukemia fusion gene associated with spontaneous acute lymphoblastic leukemia. Members of this family have th…	chr4:86934606-87141054	GO:0010468 regulation of gene expression;GO:0010467 gene expression;GO:0060255 regulation of macromolecule metabolic process	[GO:0005575] cellular_component; [GO:0005622] intracellular; [GO:0043226] organelle; [GO:0005634] nucleus; [GO:0003674] molecular_function; [GO:0008150] biological_process; [GO:0032991] protein-containing complex; [GO:0005654] nucleoplasm	GO:0032783 ELL-EAF complex;GO:0008023 transcription elongation factor complex;GO:0044451 nucleoplasm part	GO:0005515 protein binding;GO:0005488 binding;GO:0003674 molecular_function		Predicted intracellular proteins; Disease related genes; Cancer-related genes	[IPR007797] Transcription factor AF4/FMR2	Mitochondria;Nucleoplasm (reliability'])								MP:0010768 mortality/aging; MP:0005378 growth/size/body region phenotype; MP:0005386 behavior/neurological phenotype; MP:0005387 immune system phenotype; MP:0005389 reproductive system phenotype; MP:0003631 nervous system phenotype; MP:0005391 vision/eye phenotype; MP:0005397 hematopoietic system phenotype; MP:0005379 endocrine/exocrine gland phenotype	[ORPHA:99860] Precursor B-cell acute lymphoblastic leukemia	OMIM ID:159557 Af4/fmr2 family, member 1		Insulin;Personality	Alzheimer Disease;Lupus Erythematosus, Systemic;Triglycerides					Leukemia secondary; Infant Leukemia; Adult Pre-B Acute Lymphoblastic Leukemia; Childhood Pre-B Acute Lymphoblastic Leukemia; Infant Acute Lymphoblastic Leukemia; Bilirubin measurement; Hemoglobin measurement; Hematocrit procedure; Precursor B-Cell Lymphoblastic Leukemia-Lymphoma; Alcohol consumption; Platelet mean volume determination (procedure); MIXED LINEAGE LEUKEMIA; Lewy Body Disease; Mean C…	38	93	[{"UniProt":"P51825","EnsemblGene":["ENSG00000172493"],"RefSeq":[["NM_001313960","NP_001300889","REVIEWED"]],"SwissProt":["AFF1_HUMAN"]},{"UniProt":"B4DJU9","RefSeq":[["NM_001313960","NP_001300889","REVIEWED"]],"SwissProt":["B4DJU9_HUMAN"]},{"UniProt":"Q14C88","RefSeq":[["NM_001166693","NP_001160165","REVIEWED"],["NM_001313959","NP_001300888","REVIEWED"],["NM_001313960","NP_001300889","REVIEWED"]…		Distribution: Detected in all; Specificity: Tissue enhanced				(ko05202)Transcriptional misregulation in cancer; (hsa05202)Transcriptional misregulation in cancer			(M5906)HALLMARK ESTROGEN RESPONSE EARLY; (M5907)HALLMARK ESTROGEN RESPONSE LATE
Oncogene	KMT2A	4297	ALL-1|CXXC7|HRX|HTRX1|MLL|MLL1|MLL1A|TRX1|WDSTS	lysine methyltransferase 2A	This gene encodes a transcriptional coactivator that plays an essential role in regulating gene expression during early development and hematopoiesis. The encoded protein contains multiple conserved functional domains. One of these domains, the SET domain, is responsible for its histone H3 lysine 4 (H3K4) methyltransferase activity which mediates chromatin modifications associated with epigenetic…	chr11:118436492-118526832	GO:1905642 negative regulation of DNA methylation;GO:0071440 regulation of histone H3-K14 acetylation;GO:0044648 histone H3-K4 dimethylation	[GO:0003674] molecular_function; [GO:0003677] DNA binding; [GO:0043167] ion binding; [GO:0008150] biological_process; [GO:0034641] cellular nitrogen compound metabolic process; [GO:0009058] biosynthetic process; [GO:0005575] cellular_component; [GO:0005622] intracellular; [GO:0043226] organelle; [GO:0005634] nucleus; [GO:0008168] methyltransferase activity; [GO:0051276] chromosome organization; […	GO:0044665 MLL1/2 complex;GO:0071339 MLL1 complex;GO:0035097 histone methyltransferase complex	GO:0003680 AT DNA binding;GO:0045322 unmethylated CpG binding;GO:0042800 histone methyltransferase activity (H3-K4 specific)		Predicted intracellular proteins; Disease related genes; Transcription factors:Zinc-coordinating DNA-binding domains; Cancer-related genes:Mutational cancer driver genes; Enzymes; Potential drug targets; ENZYME proteins:Transferases; Cancer-related genes:Mutated cancer genes	[IPR001214] SET domain; [IPR001487] Bromodomain; [IPR001965] Zinc finger, PHD-type; [IPR002857] Zinc finger, CXXC-type; [IPR003616] Post-SET domain; [IPR003888] FY-rich, N-terminal; [IPR003889] FY-rich, C-terminal; [IPR011011] Zinc finger, FYVE/PHD-type; [IPR013083] Zinc finger, RING/FYVE/PHD-type; [IPR016569] Methyltransferase, trithorax; [IPR019787] Zinc finger, PHD-finger; [IPR034732] Extended…	Nucleoplasm (reliability']); Additional: Cytosol					yes			MP:0005370 liver/biliary system phenotype; MP:0005385 cardiovascular system phenotype; MP:0010768 mortality/aging; MP:0005369 muscle phenotype; MP:0005376 homeostasis/metabolism phenotype; MP:0005384 cellular phenotype; MP:0005378 growth/size/body region phenotype; MP:0005386 behavior/neurological phenotype; MP:0005387 immune system phenotype; MP:0002006 neoplasm; MP:0005389 reproductive system p…	[ORPHA:98831] Acute myeloid leukemia with 11q23 abnormalities; [ORPHA:402017] Acute myeloid leukemia with t9; [ORPHA:98835] Acute undifferentiated leukemia; [ORPHA:199] Cornelia de Lange syndrome; [ORPHA:530995] Mixed phenotype acute leukemia; [ORPHA:99860] Precursor B-cell acute lymphoblastic leukemia; [ORPHA:319182] Wiedemann-Steiner syndrome	OMIM ID:159555 Lysine-specific methyltransferase 2a	Wiedemann-Steiner syndrome; Microcephaly; Intellectual disability; Inborn genetic diseases; intellectual deficiency; Cornelia de Lange syndrome 1	Blood Pressure;Cholesterol	Attention Deficit Disorder with Hyperactivity;Bipolar Disorder;Child Development Disorders, Pervasive;Depressive Disorder;Schizophrenia	[605130] Wiedemann-Steiner syndrome	Cornelia de lange syndrome 1: pathogenic; Clinvar: phenotype not specified: likely pathogenic,pathogenic,uncertain significance; Inborn genetic diseases: pathogenic,uncertain significance; Kabuki syndrome 1: pathogenic; Wiedemann-steiner syndrome: likely pathogenic,pathogenic; Intellectual deficiency: likely pathogenic,pathogenic	HP:0100581:Dilatation of renal calices; HP:0006712:Aplasia/Hypoplasia of the ribs; HP:0004540:Congenital, generalized hypertrichosis; HP:0010485:Hyperextensibility at elbow; HP:0002361:Psychomotor deterioration; HP:0009811:Abnormality of the elbow; HP:0001557:Prenatal movement abnormality; HP:0002580:Volvulus; HP:0000667:Phthisis bulbi; HP:0000744:Low frustration tolerance; HP:0010300:Abnormally …		Cervical spine instability; Elbow hypertrichosis; Fast-growing nails; Hypertrichosis cubiti short stature; Precursor B-lymphoblastic lymphoma stage II; Testicular Sarcoma; Undifferentiated type acute leukemia; Congenital subaortic stenosis; Aplasia/Hypoplasia of the ribs; Caliectasis; Wrinkly skin syndrome; Growth Deficiency and Mental Retardation with Facial Dysmorphism; Chromosome 6, monosomy 6…	386	530	[{"UniProt":"Q03164","EnsemblGene":["ENSG00000118058"],"SwissProt":["KMT2A_HUMAN"]}]	lymph_node	Distribution: Detected in all; Specificity: Low tissue specificity	Ubiquitous nuclear expression.; antibody: Most normal cells showed weak to moderate cytoplasmic and nuclear positivity. Gallbladder and epididymis were strongly stained.	Antibody: A majority of cancers displayed weak to moderate cytoplasmic and nuclear positivity. Several prostate cancers were negative.		(ko00310)Lysine degradation; (hsa00310)Lysine degradation; (hsa04934)cushing syndrome
Oncogene	MDM2	4193	ACTFS|HDMX|LSKB|hdm2	MDM2 proto-oncogene	This gene encodes a nuclear-localized E3 ubiquitin ligase. The encoded protein can promote tumor formation by targeting tumor suppressor proteins, such as p53, for proteasomal degradation. This gene is itself transcriptionally-regulated by p53. Overexpression or amplification of this locus is detected in a variety of different cancers. There is a pseudogene for this gene on chromosome 2. Alternat…	chr12:68808149-68850686	GO:0071301 cellular response to vitamin B1;GO:1904404 response to formaldehyde;GO:0010266 response to vitamin B1	[GO:0005575] cellular_component; [GO:0005622] intracellular; [GO:0043226] organelle; [GO:0005634] nucleus; [GO:0003674] molecular_function; [GO:0008150] biological_process; [GO:0006464] cellular protein modification process; [GO:0034641] cellular nitrogen compound metabolic process; [GO:0009058] biosynthetic process; [GO:0008219] cell death; [GO:0007049] cell cycle; [GO:0008283] cell population p…	GO:0030666 endocytic vesicle membrane;GO:0030139 endocytic vesicle;GO:0030659 cytoplasmic vesicle membrane	GO:0061663 NEDD8 ligase activity;GO:0019788 NEDD8 transferase activity;GO:0008097 5S rRNA binding		Predicted intracellular proteins; Disease related genes; Cancer-related genes:Candidate cancer biomarkers; Enzymes; Potential drug targets; ENZYME proteins:Transferases	[IPR001841] Zinc finger, RING-type; [IPR001876] Zinc finger, RanBP2-type; [IPR003121] SWIB/MDM2 domain; [IPR013083] Zinc finger, RING/FYVE/PHD-type; [IPR015459] Ubiquitin-protein ligase E3 MDM2; [IPR016495] p53 negative regulator Mdm2/Mdm4; [IPR028340] E3 ubiquitin-protein ligase Mdm2; [IPR036443] Zinc finger, RanBP2-type superfamily; [IPR036885] SWIB/MDM2 domain superfamily	Nucleoplasm (reliability'])								MP:0005367 renal/urinary system phenotype; MP:0005370 liver/biliary system phenotype; MP:0005385 cardiovascular system phenotype; MP:0010768 mortality/aging; MP:0005369 muscle phenotype; MP:0005376 homeostasis/metabolism phenotype; MP:0005384 cellular phenotype; MP:0005378 growth/size/body region phenotype; MP:0005381 digestive/alimentary phenotype; MP:0005387 immune system phenotype; MP:0002006 …	[ORPHA:99970] Dedifferentiated liposarcoma; [ORPHA:524] Li-Fraumeni syndrome; [ORPHA:99971] Well-differentiated liposarcoma	OMIM ID:164785 Mdm2 protooncogene					Accelerated tumor formation, susceptibility to: risk factor	HP:0100641:Neoplasm of the adrenal cortex; HP:0002669:Osteosarcoma; HP:0012211:Abnormal renal physiology; HP:0002448:Progressive encephalopathy; HP:0100273:Neoplasm of the colon; HP:0004375:Neoplasm of the nervous system; HP:0002579:Gastrointestinal dysmotility; HP:0008069:Neoplasm of the skin; HP:0002894:Neoplasm of the pancreas; HP:0002861:Melanoma; HP:0003002:Breast carcinoma; HP:0001482:Subcu…	Zinc; Cis-[4,5-Bis-(4-Bromophenyl)-2-(2-Ethoxy-4-Methoxyphenyl)-4,5-Dihydroimidazol-1-Yl]-[4-(2-Hydroxyethyl)Piperazin-1-Yl]Methanone; Cis-[4,5-Bis-(4-Chlorophenyl)-2-(2-Isopropoxy-4-Methoxyphenyl)-4,5-Dihyd Roimidazol-1-Yl]-Piperazin-1-Yl-Methanone; Zinc acetate; Zinc chloride; Zinc sulfate, unspecified form	ACCELERATED TUMOR FORMATION, SUSCEPTIBILITY TO; Benign tumor of salivary gland; Esophageal Liposarcoma; Mesenchymoma; Secondary malignant neoplasm of heart; Storiform-Pleomorphic Malignant Fibrous Histiocytoma; Antral carcinoma; CHARCOT-MARIE-TOOTH DISEASE, AXONAL, TYPE 2P; Dermal Fibroma; Human Papillomavirus-Related Esophageal Squamous Cell Carcinoma; Intraosseous well differentiated osteosarco…	1312	1917	[{"UniProt":"A7UKX8","EnsemblGene":["ENSG00000135679"],"EnsemblTrans":[["ENST00000393415","ENSP00000377067",""]],"RefSeq":[["NM_001145337","NP_001138809","REVIEWED"]],"UCSC":["uc058qrn.1"],"SwissProt":["A7UKX8_HUMAN"]},{"UniProt":"G3XA89","EnsemblGene":["ENSG00000135679"],"EnsemblTrans":[["ENST00000258148","ENSP00000258148",""]],"RefSeq":[["NM_001145339","NP_001138811","REVIEWED"]],"UCSC":["uc009…		Distribution: Detected in all; Specificity: Low tissue specificity	Ubiquitous nuclear expression.; antibody: All normal tissues exhibited strong nuclear immunoreactivity.	Antibody: All malignant tissues exhibited strong nuclear immunoreactivity.	(M140)PID RANBP2 PATHWAY; (M1529)SA G1 AND S PHASES; (M242)PID AURORA A PATHWAY	(ko05219)Bladder cancer; (hsa05219)Bladder cancer; (ko05214)Glioma			(M5939)HALLMARK P53 PATHWAY	(M22027)BIOCARTA RANBP2 PATHWAY; (M14863)BIOCARTA P53 PATHWAY; (M11358)BIOCARTA ARF PATHWAY
Oncogene	MCF2	4168	ARHGEF21|DBL	MCF.2 cell line derived transforming sequence	The oncogenic protein encoded by this gene is a guanine nucleotide exchange factor (GEF) that exerts control over some members of the Rho family of small GTPases. Several transcript variants encoding different isoforms have been found for this gene. These isoforms exhibit different expression patterns and varying levels of GEF activity.[provided by RefSeq, Jan 2010]	chrX:139708279-139581768	GO:0050771 negative regulation of axonogenesis;GO:1990823 response to leukemia inhibitory factor;GO:1990830 cellular response to leukemia inhibitory factor	[GO:0003674] molecular_function; [GO:0019899] enzyme binding; [GO:0007165] signal transduction; [GO:0008150] biological_process; [GO:0005575] cellular_component; [GO:0005737] cytoplasm; [GO:0005622] intracellular; [GO:0005829] cytosol; [GO:0043226] organelle; [GO:0005856] cytoskeleton; [GO:0008219] cell death; [GO:0030154] cell differentiation; [GO:0048856] anatomical structure development; [GO:0…	GO:0005856 cytoskeleton;GO:0005829 cytosol;GO:0043232 intracellular non-membrane-bounded organelle	GO:0005089 Rho guanyl-nucleotide exchange factor activity;GO:0005088 Ras guanyl-nucleotide exchange factor activity;GO:0017048 Rho GTPase binding		Predicted intracellular proteins	[IPR000219] Dbl homology (DH) domain; [IPR001251] CRAL-TRIO lipid binding domain; [IPR001331] Guanine-nucleotide dissociation stimulator, CDC24, conserved site; [IPR001849] Pleckstrin homology domain; [IPR011993] PH-like domain superfamily; [IPR018159] Spectrin/alpha-actinin; [IPR035899] Dbl homology (DH) domain superfamily; [IPR036865] CRAL-TRIO lipid binding domain superfamily						yes			MP:0003631 nervous system phenotype		OMIM ID:311030 Mcf.2 cell line-derived transforming sequence		Blood Pressure;Electrocardiography;Glucose;Hemoglobins;Lipoproteins						Hypoparathyroidism - X-linked; Perisylvian syndrome; Neuroepithelioma; Bilateral Cryptorchidism; Neuroectodermal Tumor, Primitive; Borderline Personality Disorder; Cyst; Germ cell tumor; Ewings sarcoma; Malaria; B-Cell Lymphomas; Liver carcinoma; Tumor Cell Invasion; Primary malignant neoplasm; Malignant Neoplasms; Neoplasms	11	37	[{"UniProt":"P10911","EnsemblGene":["ENSG00000101977"],"SwissProt":["MCF2_HUMAN"]},{"UniProt":"B2R9S6","RefSeq":[["NM_001171877","NP_001165348","REVIEWED"],["NM_001171878","NP_001165349","REVIEWED"],["NM_001171879","NP_001165350","REVIEWED"],["NM_005369","NP_005360","REVIEWED"]],"SwissProt":["B2R9S6_HUMAN"]}]	testis	Distribution: Detected in many; Specificity: Tissue enhanced			(M83)PID CDC42 REG PATHWAY; (M241)PID RAC1 REG PATHWAY; (M68)PID RHOA REG PATHWAY
Oncogene	MAS1	4142	MAS|MGRA	MAS1 proto-oncogene, G protein-coupled receptor	This gene encodes a class I seven-transmembrane G-protein-coupled receptor. The encoded protein is a receptor for angiotensin-(1-7) and preferentially couples to the Gq protein, activating the phospholipase C signaling pathway. The encoded protein may play a role in multiple processes including hypotension, smooth muscle relaxation and cardioprotection by mediating the effects of angiotensin-(1-7…	chr6:159890988-159917447	GO:0038166 angiotensin-activated signaling pathway;GO:1904385 cellular response to angiotensin;GO:1990776 response to angiotensin	[GO:0007165] signal transduction; [GO:0008150] biological_process; [GO:0005575] cellular_component; [GO:0003674] molecular_function; [GO:0005886] plasma membrane; [GO:0006464] cellular protein modification process; [GO:0000003] reproduction; [GO:0008283] cell population proliferation; [GO:0048856] anatomical structure development; [GO:0009058] biosynthetic process; [GO:0006950] response to stress…	GO:0005887 integral component of plasma membrane;GO:0031226 intrinsic component of plasma membrane;GO:0044459 plasma membrane part	GO:0001595 angiotensin receptor activity;GO:0004945 angiotensin type II receptor activity;GO:0008528 G protein-coupled peptide receptor activity		Potential drug targets; Disease related genes; G-protein coupled receptors:GPCRs excl olfactory receptors	[IPR000276] G protein-coupled receptor, rhodopsin-like; [IPR000820] Proto-oncogene Mas; [IPR017452] GPCR, rhodopsin-like, 7TM; [IPR026234] Mas-related G protein-coupled receptor family				yes	yes		principal1	yes	MP:0005367 renal/urinary system phenotype; MP:0005385 cardiovascular system phenotype; MP:0005376 homeostasis/metabolism phenotype; MP:0005386 behavior/neurological phenotype; MP:0003631 nervous system phenotype		OMIM ID:165180 Mas1 oncogene		Lipoprotein(a);Waist-Hip Ratio						Lymphogranuloma Venereum; Irritable bowel syndrome characterized by constipation; Secondary haemophagocytic lymphohistiocytosis; Cerebellar decompression injury; Testotoxicosis; Osteitis Fibrosa Disseminata; Chronic kidney disease stage 3; Arthritis, Infectious; Aneurysm of ascending aorta; Arthritis, Bacterial; Meconium Aspiration Syndrome; McCune-Albright Syndrome; Myocardial infarction, stroke…	31	55	[{"UniProt":"P04201","EnsemblGene":["ENSG00000130368"],"EnsemblTrans":[["ENST00000252660","ENSP00000252660","principal1"],["ENST00000674077","ENSP00000501180","principal1"]],"RefSeq":[["NM_002377","NP_002368","REVIEWED"]],"SwissProt":["MAS_HUMAN"]},{"UniProt":"W8W3P4","RefSeq":[["NM_002377","NP_002368","REVIEWED"]],"UCSC":["uc003qsz.4"],"SwissProt":["W8W3P4_HUMAN"]}]		Distribution: Detected in some; Specificity: Tissue enhanced				(hsa04614)Renin-angiotensin system; (ko04614)Renin-angiotensin system; (ko04080)Neuroactive ligand-receptor interaction
Oncogene	TBC1D3C	414060	PRC17|TBC1D3|TBC1D3A|TBC1D3D	TBC1 domain family member 3C	This gene represents one of a cluster of related genes found on chromosome 17. The proteins encoded by this gene family contain a TBC (Tre-2, Bub2p, and Cdc16p) domain and may be involved in GTPase signaling and vesicle trafficking. [provided by RefSeq, Apr 2014]	chr17:38068634-38057693	GO:0090630 activation of GTPase activity;GO:0043547 positive regulation of GTPase activity;GO:0043087 regulation of GTPase activity	[GO:0005575] cellular_component; [GO:0005886] plasma membrane; [GO:0003674] molecular_function; [GO:0030234] enzyme regulator activity; [GO:0008150] biological_process; [GO:0019899] enzyme binding; [GO:0006810] transport; [GO:0015031] protein transport	GO:0005886 plasma membrane;GO:0071944 cell periphery;GO:0016020 membrane	GO:0017137 Rab GTPase binding;GO:0005096 GTPase activator activity;GO:0030695 GTPase regulator activity			[IPR000195] Rab-GTPase-TBC domain; [IPR035969] Rab-GTPase-TBC domain superfamily	Vesicles (reliability'])				yes		principal1				OMIM ID:610806 Tbc1 domain family, member 3c		Parathyroid Hormone						Prostatic Neoplasms; Prostate carcinoma; Malignant neoplasm of prostate; Neoplasms	1	8	[{"UniProt":"Q6IPX1","EnsemblGene":["ENSG00000278299"],"EnsemblTrans":[["ENST00000622206","ENSP00000482345","principal1"]],"RefSeq":[["NM_001001418","NP_001001418","REVIEWED"],["NM_001123391","NP_001116863","VALIDATED"],["NM_001291462","NP_001278391","VALIDATED"]],"SwissProt":["TBC3C_HUMAN"]},{"UniProt":"Q8IZP1","EnsemblGene":["ENSG00000274611"],"SwissProt":["TBC3A_HUMAN"]}]		Distribution: Detected in some; Specificity: Tissue enhanced	Cytoplasmic expression in spermatids.
Oncogene	MAF	4094	AYGRP|CCA4|CTRCT21|c-MAF	MAF bZIP transcription factor	The protein encoded by this gene is a DNA-binding, leucine zipper-containing transcription factor that acts as a homodimer or as a heterodimer. Depending on the binding site and binding partner, the encoded protein can be a transcriptional activator or repressor. This protein plays a role in the regulation of several cellular processes, including embryonic lens fiber cell development, increased T…	chr16:79601952-79202624	GO:0070306 lens fiber cell differentiation;GO:0032330 regulation of chondrocyte differentiation;GO:0061035 regulation of cartilage development	[GO:0003674] molecular_function; [GO:0003677] DNA binding; [GO:0008150] biological_process; [GO:0034641] cellular nitrogen compound metabolic process; [GO:0009058] biosynthetic process; [GO:0005575] cellular_component; [GO:0005622] intracellular; [GO:0043226] organelle; [GO:0005634] nucleus; [GO:0003700] DNA-binding transcription factor activity; [GO:0005694] chromosome; [GO:0000228] nuclear chro…	GO:0000790 nuclear chromatin;GO:0000785 chromatin;GO:0044454 nuclear chromosome part	GO:0001228 DNA-binding transcription activator activity, RNA polymerase II-specific;GO:0000978 RNA polymerase II proximal promoter sequence-specific DNA binding;GO:0000987 proximal promoter sequence-specific DNA binding		Transcription factors:Basic domains; Disease related genes; Cancer-related genes; Predicted intracellular proteins	[IPR004826] Basic leucine zipper domain, Maf-type; [IPR004827] Basic-leucine zipper domain; [IPR008917] Transcription factor, Skn-1-like, DNA-binding domain superfamily; [IPR013592] Maf transcription factor, N-terminal; [IPR024874] Transcription factor Maf family; [IPR028573] Transcription factor Maf							alternative2		MP:0005367 renal/urinary system phenotype; MP:0010768 mortality/aging; MP:0005376 homeostasis/metabolism phenotype; MP:0005378 growth/size/body region phenotype; MP:0005386 behavior/neurological phenotype; MP:0005387 immune system phenotype; MP:0002006 neoplasm; MP:0003631 nervous system phenotype; MP:0005391 vision/eye phenotype; MP:0005397 hematopoietic system phenotype; MP:0010771 integument p…	[ORPHA:1377] Cataract-microcornea syndrome; [ORPHA:98989] Cerulean cataract; [ORPHA:98984] Pulverulent cataract	OMIM ID:177075 Maf bzip transcription factor	Hydrocele testis; Congenital cataract; Hearing impairment; Cataract 21, multiple types; Ayme-gripp syndrome; Spinocerebellar ataxia, autosomal recessive 12	Albumins;Arteries;Blood Pressure;Body Mass Index;Body Weight;Body Weights and Measures;Child Development Disorders, Pervasive;Cholesterol;Cholesterol, HDL;Cholesterol, LDL;Depressive Disorder, Major;Electrocardiography;Lutein;Myocardial Infarction;Natriuretic Peptide, Brain;Parkinson Disease;Platelet Function Tests;Pulmonary Disease, Chronic Obstructive;Respiratory Function Tests;Sodium;Stroke;Th…	Age of Onset;Alzheimer Disease;Antibodies, Antiphospholipid;Antidepressive Agents;Astigmatism;Binge-Eating Disorder;Biomarkers;Bipolar Disorder;Body Height;Bronchodilator Agents;Dental Caries;Depressive Disorder;Diabetes Mellitus, Type 2;Fenofibrate;HIV-1;Lung Volume Measurements;Multiple Sclerosis;Obesity;Prostate-Specific Antigen;Serotonin Uptake Inhibitors;Smoking;Thyroid Gland;Thyroid Hormone…	[No disease mim] Ayme-Gripp syndrome: CATARACT DEAFNESS INTELLECTUAL DISABILITY SEIZURES AND A DOWN SYNDROME-LIKE FACIES; [610202] CATARACT CONGENITAL CERULEAN TYPE 4; [610202] CATARACT PULVERULENT JUVENILE-ONSET MAF-RELATED	Ayme-gripp syndrome: likely pathogenic,pathogenic; Cataract 21, multiple types: likely pathogenic,pathogenic; Clinvar: phenotype not specified: likely pathogenic,pathogenic; Congenital cataract: likely pathogenic	HP:0007780:Cortical pulverulent cataract; HP:0007976:Cerulean cataract; HP:0004484:Craniofacial asymmetry; HP:0001104:Macular hypoplasia; HP:0011229:Broad eyebrow; HP:0000289:Broad philtrum; HP:0007099:Arnold-Chiari type I malformation; HP:0001701:Pericarditis; HP:0000270:Delayed cranial suture closure; HP:0002974:Radioulnar synostosis; HP:0001131:Corneal dystrophy; HP:0000541:Retinal detachment;…		CATARACT 21, MULTIPLE TYPES; Cataract, Pulverulent, Juvenile-Onset; Cataracts, Congenital, with Sensorineural Deafness, Down Syndrome-Like Facial Appearance, Short Stature, and Mental Retardation; Cortical pulverulent cataract; Cataract, congenital, cerulean type 1; Monosomy 13q14 syndrome; Cataract microcornea syndrome; Broad eyebrow; Cataract, Pulverulent; CATARACT, COPPOCK-LIKE; Broad philtrum…	66	105	[{"UniProt":"H3BP11","EnsemblGene":["ENSG00000178573"],"EnsemblTrans":[["ENST00000569649","ENSP00000455097","alternative2"]],"RefSeq":[["XM_017023233","XP_016878722","MODEL"],["XM_017023234","XP_016878723","MODEL"],["XM_017023235","XP_016878724","MODEL"]],"UCSC":["uc059xlc.1"],"SwissProt":["H3BP11_HUMAN"]},{"UniProt":"O75444","EnsemblGene":["ENSG00000178573"],"SwissProt":["MAF_HUMAN"]}]	kidney	Distribution: Detected in all; Specificity: Low tissue specificity	antibody: Moderate to strong nuclear staining in most tissues. Strongest staining in surface epithelial cells, glandular cells and CNS.; Nuclear expression in most tissues.	Antibody: Weak to moderate nuclear staining in all cancer tissues. Strong staining in several gliomas and most testis cancers were weakly stained.	(M60)PID NFAT TFPATHWAY; (M167)PID AP1 PATHWAY; (M195)PID CMYB PATHWAY	(ko05321)Inflammatory bowel disease (IBD); (hsa05321)Inflammatory bowel disease; (ko04658)Th1 and Th2 cell differentiation			(M5908)HALLMARK ANDROGEN RESPONSE
Oncogene	MIR27A	407018	MIR27|MIRN27A|mir-27a	microRNA 27a	microRNAs (miRNAs) are short (20-24 nt) non-coding RNAs that are involved in post-transcriptional regulation of gene expression in multicellular organisms by affecting both the stability and translation of mRNAs. miRNAs are transcribed by RNA polymerase II as part of capped and polyadenylated primary transcripts (pri-miRNAs) that can be either protein-coding or non-coding. The primary transcript …	chr19:13836517-13836440	GO:1900130 regulation of lipid binding;GO:1900131 negative regulation of lipid binding;GO:1905598 negative regulation of low-density lipoprotein receptor activity	[GO:0005575] cellular_component; [GO:0005576] extracellular region; [GO:0005615] extracellular space; [GO:0003674] molecular_function; [GO:0003723] RNA binding; [GO:0003729] mRNA binding; [GO:0008150] biological_process; [GO:0034641] cellular nitrogen compound metabolic process; [GO:0009058] biosynthetic process; [GO:0006412] translation; [GO:0008283] cell population proliferation; [GO:0043226] o…	GO:1903561 extracellular vesicle;GO:0043230 extracellular organelle;GO:0005615 extracellular space	GO:1903231 mRNA binding involved in posttranscriptional gene silencing;GO:0003729 mRNA binding;GO:0000976 transcription regulatory region sequence-specific DNA binding														OMIM ID:612153 Micro rna 27a								OSLER-RENDU-WEBER SYNDROME 2; Diabetic embryopathy; Mucosal atrophy; Chronic endometritis; Ovarian Diseases; Familial primary pulmonary hypertension; Acute pulmonary embolism; Diabetic Polyneuropathies; Hereditary hemorrhagic telangiectasia; Leukaemia recurrent; Endometrial Endometrioid Adenocarcinoma; Atrophic; Paratuberculosis; Peri-Implantitis; Sickle Cell-SS Disease; Axial spondyloarthritis; …	257	271							(ko05206)MicroRNAs in cancer; (hsa05206)MicroRNAs in cancer
Oncogene	MIR222	407007	MIRN222|miRNA222|mir-222	microRNA 222	microRNAs (miRNAs) are short (20-24 nt) non-coding RNAs that are involved in post-transcriptional regulation of gene expression in multicellular organisms by affecting both the stability and translation of mRNAs. miRNAs are transcribed by RNA polymerase II as part of capped and polyadenylated primary transcripts (pri-miRNAs) that can be either protein-coding or non-coding. The primary transcript …	chrX:45747124-45747015	GO:1902034 negative regulation of hematopoietic stem cell proliferation;GO:0010625 positive regulation of Schwann cell proliferation;GO:1905046 positive regulation of Schwann cell proliferation involved in axon regeneration	[GO:0005575] cellular_component; [GO:0005576] extracellular region; [GO:0005615] extracellular space; [GO:0003674] molecular_function; [GO:0003723] RNA binding; [GO:0003729] mRNA binding; [GO:0008150] biological_process; [GO:0034641] cellular nitrogen compound metabolic process; [GO:0009058] biosynthetic process; [GO:0006412] translation; [GO:0008283] cell population proliferation; [GO:0048856] a…	GO:1903561 extracellular vesicle;GO:0043230 extracellular organelle;GO:0005615 extracellular space	GO:1903231 mRNA binding involved in posttranscriptional gene silencing;GO:0003729 mRNA binding;GO:0003723 RNA binding														OMIM ID:300569 Micro rna 222		Citalopram						Acute obstructive cholangitis; recurrent papillary thyroid cancer; Familial mitral valve prolapse; Gastric Neuroendocrine Tumor; Argentaffinoma; Choledochal Cyst; Carcinoid, Goblet Cell; Follicular Variant Thyroid Gland Papillary Carcinoma; Echinococcus multilocularis infection; Focal nodular hyperplasia of liver; Mycoplasma pneumonia; Papillary Thyroid Microcarcinoma; Multinodular goiter; Recurr…	206	229							(ko05206)MicroRNAs in cancer; (hsa05206)MicroRNAs in cancer
Oncogene	MIR221	407006	MIRN221|miRNA221|mir-221	microRNA 221	microRNAs (miRNAs) are short (20-24 nt) non-coding RNAs that are involved in post-transcriptional regulation of gene expression in multicellular organisms by affecting both the stability and translation of mRNAs. miRNAs are transcribed by RNA polymerase II as part of capped and polyadenylated primary transcripts (pri-miRNAs) that can be either protein-coding or non-coding. The primary transcript …	chrX:45746266-45746157	GO:1902034 negative regulation of hematopoietic stem cell proliferation;GO:0010625 positive regulation of Schwann cell proliferation;GO:1905046 positive regulation of Schwann cell proliferation involved in axon regeneration	[GO:0005575] cellular_component; [GO:0005576] extracellular region; [GO:0005615] extracellular space; [GO:0003674] molecular_function; [GO:0003723] RNA binding; [GO:0003729] mRNA binding; [GO:0008150] biological_process; [GO:0034641] cellular nitrogen compound metabolic process; [GO:0009058] biosynthetic process; [GO:0006412] translation; [GO:0040011] locomotion; [GO:0048870] cell motility; [GO:0…	GO:1903561 extracellular vesicle;GO:0043230 extracellular organelle;GO:0005615 extracellular space	GO:1903231 mRNA binding involved in posttranscriptional gene silencing;GO:0003729 mRNA binding;GO:0003723 RNA binding														OMIM ID:300568 Micro rna 221								MGMT-Unmethylated Glioblastoma; Acute obstructive cholangitis; Metastasizing leiomyoma; Asymptomatic carotid artery stenosis; Trichorhinophalangeal syndrome; Familial mitral valve prolapse; Epidemic diarrhea; Lens Opacities; Primary Carcinoma; Pseudoaphakia; Spinal stenosis of lumbar region; Spinal Cord Ischemia; Spindle Cell Oncocytoma of the Adenohypophysis; LAURIN-SANDROW SYNDROME; Liver mass;…	311	334							(ko05206)MicroRNAs in cancer; (hsa05206)MicroRNAs in cancer
Oncogene	MIR21	406991	MIRN21|hsa-mir-21|miR-21|miRNA21	microRNA 21	microRNAs (miRNAs) are short (20-24 nt) non-coding RNAs that are involved in post-transcriptional regulation of gene expression in multicellular organisms by affecting both the stability and translation of mRNAs. miRNAs are transcribed by RNA polymerase II as part of capped and polyadenylated primary transcripts (pri-miRNAs) that can be either protein-coding or non-coding. The primary transcript …	chr17:59841266-59841337	GO:1901670 negative regulation of superoxide dismutase activity;GO:1904832 negative regulation of removal of superoxide radicals;GO:1904726 regulation of replicative senescence	[GO:0005575] cellular_component; [GO:0005576] extracellular region; [GO:0005615] extracellular space; [GO:0003674] molecular_function; [GO:0003723] RNA binding; [GO:0003729] mRNA binding; [GO:0008150] biological_process; [GO:0034641] cellular nitrogen compound metabolic process; [GO:0009058] biosynthetic process; [GO:0006412] translation; [GO:0008283] cell population proliferation; [GO:0040011] l…	GO:0070062 extracellular exosome;GO:1903561 extracellular vesicle;GO:0043230 extracellular organelle	GO:0003730 mRNA 3'-UTR binding;GO:1903231 mRNA binding involved in posttranscriptional gene silencing;GO:0003729 mRNA binding														OMIM ID:611020 Micro rna 21								Mesenteric arterial occlusion; Stage II Rectal Cancer; Stage II Rectal Cancer AJCC v7; Stage II Rectal Cancer AJCC v8; organic heart disease; progressive anemia; Hepatic schistosomiasis; Retinal fibrosis; Tubular adenocarcinoma gastric; hypertension complicated; Atherosclerotic renal artery stenosis; Biliary hyperplasia; Urethral stricture; Metastatic Adrenal Gland Pheochromocytoma; Noninvasive d…	1189	1228							(ko05205)Proteoglycans in cancer; (hsa05205)Proteoglycans in cancer; (ko05206)MicroRNAs in cancer
Oncogene	MIR155	406947	MIRN155|miRNA155|mir-155	microRNA 155	microRNAs (miRNAs) are short (20-24 nt) non-coding RNAs that are involved in post-transcriptional regulation of gene expression in multicellular organisms by affecting both the stability and translation of mRNAs. miRNAs are transcribed by RNA polymerase II as part of capped and polyadenylated primary transcripts (pri-miRNAs) that can be either protein-coding or non-coding. The primary transcript …	chr21:25573980-25574044	GO:0050710 negative regulation of cytokine secretion;GO:0050709 negative regulation of protein secretion;GO:0050707 regulation of cytokine secretion	[GO:0005575] cellular_component; [GO:0005576] extracellular region; [GO:0005615] extracellular space; [GO:0003674] molecular_function; [GO:0003723] RNA binding; [GO:0003729] mRNA binding; [GO:0008150] biological_process; [GO:0034641] cellular nitrogen compound metabolic process; [GO:0009058] biosynthetic process; [GO:0006412] translation; [GO:0042592] homeostatic process; [GO:0040011] locomotion;…		GO:1903231 mRNA binding involved in posttranscriptional gene silencing;GO:0003729 mRNA binding;GO:0003723 RNA binding												MP:0005370 liver/biliary system phenotype; MP:0010768 mortality/aging; MP:0005384 cellular phenotype; MP:0005378 growth/size/body region phenotype; MP:0005386 behavior/neurological phenotype; MP:0005381 digestive/alimentary phenotype; MP:0005387 immune system phenotype; MP:0002006 neoplasm; MP:0005397 hematopoietic system phenotype; MP:0005379 endocrine/exocrine gland phenotype; MP:0010771 integu…		OMIM ID:609337 Micro rna 155								Myocarditis due to infectious agent; Spinal cord paralysis; Cyanotic heart disease; Diabetic Heart Disease; Myeloid hyperplasia; White Coat Hypertension; Benign neoplasm of skin; Secondary bacterial pneumonia; Tinea cruris; Tinea of perianal region; Peritoneal Infection; Polyarthralgia; ankle arthritis; Hyperuricemia without signs of inflammatory arthritis and tophaceous disease; asymptomatic hyp…	645	674							(ko05206)MicroRNAs in cancer; (hsa05206)MicroRNAs in cancer
Oncogene	MIR150	406942	MIRN150|miRNA150|mir-150	microRNA 150	microRNAs (miRNAs) are short (20-24 nt) non-coding RNAs that are involved in post-transcriptional regulation of gene expression in multicellular organisms by affecting both the stability and translation of mRNAs. miRNAs are transcribed by RNA polymerase II as part of capped and polyadenylated primary transcripts (pri-miRNAs) that can be either protein-coding or non-coding. The primary transcript …	chr19:49500868-49500785	GO:1905772 positive regulation of mesodermal cell differentiation;GO:1905904 positive regulation of mesoderm formation;GO:1905770 regulation of mesodermal cell differentiation	[GO:0005575] cellular_component; [GO:0005576] extracellular region; [GO:0005615] extracellular space; [GO:0003674] molecular_function; [GO:0003723] RNA binding; [GO:0003729] mRNA binding; [GO:0008150] biological_process; [GO:0030154] cell differentiation; [GO:0048856] anatomical structure development; [GO:0040011] locomotion; [GO:0048646] anatomical structure formation involved in morphogenesis; …	GO:0005615 extracellular space;GO:0044421 extracellular region part;GO:0005576 extracellular region	GO:1903231 mRNA binding involved in posttranscriptional gene silencing;GO:0003729 mRNA binding;GO:0003723 RNA binding												MP:0005384 cellular phenotype; MP:0005387 immune system phenotype; MP:0005397 hematopoietic system phenotype		OMIM ID:611114 Micro rna 150								Drug-induced mucositis; Sepsis due to urinary tract infection; Chronic systolic heart failure; Evans syndrome; Iron Metabolism Disorders; Cardioembolism (high-risk/medium-risk); CHROMOSOME 8p11 MYELOPROLIFERATIVE SYNDROME; Myasthenia Gravis, Ocular; stage, bladder cancer; Cervix carcinoma recurrent; AIDS (Disease); THROMBOCYTOPENIA 1 (disorder); Obesity-Associated Insulin Resistance; Adult Cranio…	200	206							(ko05206)MicroRNAs in cancer; (hsa05206)MicroRNAs in cancer
Oncogene	MIR107	406901	MIRN107|miR-107	microRNA 107	microRNAs (miRNAs) are short (20-24 nt) non-coding RNAs that are involved in post-transcriptional regulation of gene expression in multicellular organisms by affecting both the stability and translation of mRNAs. miRNAs are transcribed by RNA polymerase II as part of capped and polyadenylated primary transcripts (pri-miRNAs) that can be either protein-coding or non-coding. The primary transcript …	chr10:89592827-89592747	GO:0060545 positive regulation of necroptotic process;GO:0010940 positive regulation of necrotic cell death;GO:0046325 negative regulation of glucose import	[GO:0005575] cellular_component; [GO:0005576] extracellular region; [GO:0005615] extracellular space; [GO:0003674] molecular_function; [GO:0003723] RNA binding; [GO:0003729] mRNA binding; [GO:0008150] biological_process; [GO:0034641] cellular nitrogen compound metabolic process; [GO:0009058] biosynthetic process; [GO:0006412] translation; [GO:0043226] organelle; [GO:0030154] cell differentiation;…	GO:0043025 neuronal cell body;GO:0044297 cell body;GO:0036477 somatodendritic compartment	GO:1903231 mRNA binding involved in posttranscriptional gene silencing;GO:0003729 mRNA binding;GO:0003723 RNA binding														OMIM ID:613189 Micro rna 107		Fibrinogen						HPV positive oropharyngeal squamous cell carcinoma; Motor Disorders; Noise-induced hearing loss; SIMPSON-GOLABI-BEHMEL SYNDROME, TYPE 1; Invasive Prostate Carcinoma; hypertensive nephropathy; Advanced breast cancer; Progression of non-small cell lung cancer; Familial lichen amyloidosis; PARKINSON DISEASE, LATE-ONSET; insulinoma; Brain Diseases; Chemically-Induced Liver Toxicity; Hepatitis, Toxic;…	101	116							(ko05206)MicroRNAs in cancer; (hsa05206)MicroRNAs in cancer
Oncogene	LMO2	4005	LMO-2|RBTN2|RBTNL1|RHOM2|TTG2	LIM domain only 2	LMO2 encodes a cysteine-rich, two LIM-domain protein that is required for yolk sac erythropoiesis. The LMO2 protein has a central and crucial role in hematopoietic development and is highly conserved. The LMO2 transcription start site is located approximately 25 kb downstream from the 11p13 T-cell translocation cluster (11p13 ttc), where a number T-cell acute lymphoblastic leukemia-specific trans…	chr11:33892076-33858576	GO:0097067 cellular response to thyroid hormone stimulus;GO:0097066 response to thyroid hormone;GO:1902036 regulation of hematopoietic stem cell differentiation	[GO:0008150] biological_process; [GO:0034641] cellular nitrogen compound metabolic process; [GO:0009058] biosynthetic process; [GO:0005575] cellular_component; [GO:0005622] intracellular; [GO:0043226] organelle; [GO:0005634] nucleus; [GO:0003674] molecular_function; [GO:0043167] ion binding; [GO:0005654] nucleoplasm; [GO:0030154] cell differentiation; [GO:0048856] anatomical structure development…	GO:0005667 transcription factor complex;GO:0005654 nucleoplasm;GO:0031981 nuclear lumen	GO:0043425 bHLH transcription factor binding;GO:0001102 RNA polymerase II activating transcription factor binding;GO:0001221 transcription cofactor binding		Predicted intracellular proteins; Disease related genes; Cancer-related genes	[IPR001781] Zinc finger, LIM-type	Nucleoplasm (reliability'])								MP:0005385 cardiovascular system phenotype; MP:0010768 mortality/aging; MP:0005384 cellular phenotype; MP:0005378 growth/size/body region phenotype; MP:0005387 immune system phenotype; MP:0002006 neoplasm; MP:0003631 nervous system phenotype; MP:0005397 hematopoietic system phenotype; MP:0005379 endocrine/exocrine gland phenotype; MP:0010771 integument phenotype; MP:0005380 embryo phenotype		OMIM ID:180385 Lim domain only 2		Interleukin-6;Monocytes;Parkinson Disease;Platelet Function Tests;gamma-Glutamyltransferase	Neuropsychological Tests;Vascular Calcification					Early T Acute Lymphoblastic Leukemia; WAGR Syndrome; High grade B-cell lymphoma; X-Linked Combined Immunodeficiency Diseases; Leukaemia recurrent; Disorder of tendon; Tendinopathy; Adult Lymphoblastic Lymphoma; Childhood Lymphoblastic Lymphoma; Precursor cell lymphoblastic lymphoma; Acute Undifferentiated Leukemia; Undifferentiated leukemia; Marginal Zone B-Cell Lymphoma; Teratocarcinoma; Cooley'…	86	135	[{"UniProt":"P25791","EnsemblGene":["ENSG00000135363"],"SwissProt":["RBTN2_HUMAN"]}]	blood	Distribution: Detected in all; Specificity: Low tissue specificity	antibody: Most of the normal tissues displayed moderate to strong cytoplasmic positivity. The liver was negative.; Nuclear expression in bone marrow and cytoplasmic expression in several tissues.	Antibody: Most cancer tissues showed weak to moderate cytoplasmic immunoreactivity. Most cases of gliomas, renal and skin cancers were negative.		(ko05202)Transcriptional misregulation in cancer; (hsa05202)Transcriptional misregulation in cancer			(M5957)HALLMARK PANCREAS BETA CELLS; (M5945)HALLMARK HEME METABOLISM
Oncogene	JUN	3725	AP-1|AP1|c-Jun|cJUN|p39	Jun proto-oncogene, AP-1 transcription factor subunit	This gene is the putative transforming gene of avian sarcoma virus 17. It encodes a protein which is highly similar to the viral protein, and which interacts directly with specific target DNA sequences to regulate gene expression. This gene is intronless and is mapped to 1p32-p31, a chromosomal region involved in both translocations and deletions in human malignancies. [provided by RefSeq, Jul 20…	chr1:58784047-58780791	GO:0035026 leading edge cell differentiation;GO:0051365 cellular response to potassium ion starvation;GO:1990441 negative regulation of transcription from RNA polymerase II promoter in response to endoplasmic reticulum stress	[GO:0003674] molecular_function; [GO:0003677] DNA binding; [GO:0008150] biological_process; [GO:0034641] cellular nitrogen compound metabolic process; [GO:0009058] biosynthetic process; [GO:0003700] DNA-binding transcription factor activity; [GO:0008283] cell population proliferation; [GO:0007165] signal transduction; [GO:0005575] cellular_component; [GO:0005622] intracellular; [GO:0043226] organ…	GO:0035976 transcription factor AP-1 complex;GO:0005719 nuclear euchromatin;GO:0000791 euchromatin	GO:0035497 cAMP response element binding;GO:0071837 HMG box domain binding;GO:0070412 R-SMAD binding		FDA approved drug targets:Small molecule drugs; Cancer-related genes:Candidate cancer biomarkers; Predicted intracellular proteins; Transcription factors:Basic domains	[IPR002112] Transcription factor Jun; [IPR004827] Basic-leucine zipper domain; [IPR005643] Jun-like transcription factor; [IPR008917] Transcription factor, Skn-1-like, DNA-binding domain superfamily; [IPR015558] Transcription Factor c-Jun/v-Jun	Nucleoplasm (reliability'])						principal1		MP:0005370 liver/biliary system phenotype; MP:0005385 cardiovascular system phenotype; MP:0010768 mortality/aging; MP:0005376 homeostasis/metabolism phenotype; MP:0005384 cellular phenotype; MP:0005378 growth/size/body region phenotype; MP:0005386 behavior/neurological phenotype; MP:0005387 immune system phenotype; MP:0003631 nervous system phenotype; MP:0005391 vision/eye phenotype; MP:0005390 s…		OMIM ID:165160 V-jun avian sarcoma virus 17 oncogene homolog		Lipids;Platelet Function Tests;Triglycerides					Adapalene; Vinblastine; Irbesartan; Arsenic trioxide; LGD-1550	Inorganic Mercury Poisoning; Mad Hatter Disease; Mercurial Neuroanesthenia; Mercury Encephalopathy; Mercury Poisoning, Organic; Mercury Psychosis; Minamata Disease; Mercury Poisoning, Nervous System; Scalp psoriasis; essential thrombocytopenia; Rainbow Trout Hepatoma; Corneal dystrophy, Fuchs' endothelial, 1; Ichthyosis Vulgaris; Other emphysema; Destructive Arthritis; Lymphoid neoplasm; Dilatati…	752	1178	[{"UniProt":"P05412","EnsemblGene":["ENSG00000177606"],"EnsemblTrans":[["ENST00000371222","ENSP00000360266","principal1"]],"RefSeq":[["NM_002228","NP_002219","REVIEWED"]],"UCSC":["uc001cze.4"],"SwissProt":["JUN_HUMAN"]}]		Distribution: Detected in all; Specificity: Low tissue specificity	Nuclear expression in several tissues, mostly in a fraction of the cells.; antibody: A majority of normal tissues displayed moderate to strong nuclear immunoreactivity. In liver, testis and lymphoid organs only a fraction of the cells were positive. Heart muscle, spleen and the CNS were in general negative.	Antibody: Most malignant cells showed distinct nuclear immunoreactivity of varying fraction and intensity. Several malignant lymphomas, testicular cancers and liver cancers were negative.	(M190)PID TCR JNK PATHWAY; (M206)PID PDGFRA PATHWAY; (M17200)SA B CELL RECEPTOR COMPLEXES	(ko05030)Cocaine addiction; (hsa05030)Cocaine addiction; (ko05210)Colorectal cancer			(M5897)HALLMARK IL6 JAK STAT3 SIGNALING; (M5902)HALLMARK APOPTOSIS; (M5890)HALLMARK TNFA SIGNALING VIA NFKB	(M22039)BIOCARTA TSP1 PATHWAY; (M15513)BIOCARTA D4GDI PATHWAY; (M18899)BIOCARTA DREAM PATHWAY
Oncogene	HOXA9	3205	ABD-B|HOX1|HOX1.7|HOX1G	homeobox A9	In vertebrates, the genes encoding the class of transcription factors called homeobox genes are found in clusters named A, B, C, and D on four separate chromosomes. Expression of these proteins is spatially and temporally regulated during embryonic development. This gene is part of the A cluster on chromosome 7 and encodes a DNA-binding transcription factor which may regulate gene expression, mor…	chr7:27165537-27162438	GO:0042118 endothelial cell activation;GO:0060216 definitive hemopoiesis;GO:0060065 uterus development	[GO:0003674] molecular_function; [GO:0003677] DNA binding; [GO:0008150] biological_process; [GO:0034641] cellular nitrogen compound metabolic process; [GO:0009058] biosynthetic process; [GO:0005575] cellular_component; [GO:0005622] intracellular; [GO:0043226] organelle; [GO:0005634] nucleus; [GO:0005654] nucleoplasm; [GO:0048856] anatomical structure development; [GO:0003700] DNA-binding transcri…	GO:0005667 transcription factor complex;GO:0000790 nuclear chromatin;GO:0000785 chromatin	GO:0001228 DNA-binding transcription activator activity, RNA polymerase II-specific;GO:0000978 RNA polymerase II proximal promoter sequence-specific DNA binding;GO:0000987 proximal promoter sequence-specific DNA binding		Transcription factors:Helix-turn-helix domains; Cancer-related genes:Candidate cancer biomarkers; Disease related genes; Predicted intracellular proteins	[IPR001356] Homeobox domain; [IPR006711] Hox9, N-terminal activation domain; [IPR009057] Homeobox-like domain superfamily; [IPR017112] Homeobox protein HXA9/HXB9/HXC9; [IPR017970] Homeobox, conserved site; [IPR020479] Homeobox domain, metazoa	Nucleoplasm (reliability'])					yes	principal1		MP:0005378 growth/size/body region phenotype; MP:0005387 immune system phenotype; MP:0005390 skeleton phenotype; MP:0005397 hematopoietic system phenotype		OMIM ID:142956 Homeobox a9								Therapy-related acute myeloid leukemia and myelodysplastic syndrome; Philadelphia chromosome positive chronic myelogenous leukemia; Adenocarcinoma of lung, stage I; Neoplasm Recurrence, Local; Bladder cancer stage IV; Acute biphenotypic leukemia; CML progression; Malignant Meningioma; Infant Acute Lymphoblastic Leukemia; Treatment related acute myeloid leukaemia; Locally Recurrent Malignant Neopl…	144	181	[{"UniProt":"P31269","EnsemblGene":["ENSG00000078399"],"EnsemblTrans":[["ENST00000343483","ENSP00000343619","principal1"]],"RefSeq":[["NM_152739","NP_689952","REVIEWED"]],"UCSC":["uc003syt.4"],"SwissProt":["HXA9_HUMAN"]}]	colon;kidney	Distribution: Detected in many; Specificity: Tissue enhanced	General nuclear expression.; antibody: Most normal tissues showed moderate to strong nuclear positivity. Heart and parathyroid glands exhibited moderate cytoplasmic positivity. Appendix and neuropil were negative.	Antibody: Most cancer cells showed moderate nuclear positivity. Cases of renal cell carcinomas and carcinoids displayed strong staining. Additional cytoplasmic positivity was observed in several renal cell carcinomas and a few cases of colorectal, endometrial and liver cancers.		(ko05202)Transcriptional misregulation in cancer; (hsa05202)Transcriptional misregulation in cancer
Oncogene	GNAS	2778	AHO|C20orf45|GNAS1|GPSA|GSA|GSP|NESP|PITA3|POH|SCG6|SgVI	GNAS complex locus	This locus has a highly complex imprinted expression pattern. It gives rise to maternally, paternally, and biallelically expressed transcripts that are derived from four alternative promoters and 5' exons. Some transcripts contain a differentially methylated region (DMR) at their 5' exons, and this DMR is commonly found in imprinted genes and correlates with transcript expression. An antisense tr…	chr20:58839681-58911192	GO:0040032 post-embryonic body morphogenesis;GO:2000828 regulation of parathyroid hormone secretion;GO:0035898 parathyroid hormone secretion	[GO:0008150] biological_process; [GO:0005575] cellular_component; [GO:0005622] intracellular; [GO:0043226] organelle; [GO:0005634] nucleus; [GO:0005737] cytoplasm; [GO:0005576] extracellular region; [GO:0031410] cytoplasmic vesicle; [GO:0003674] molecular_function; [GO:0000003] reproduction; [GO:0042592] homeostatic process; [GO:0006810] transport; [GO:0015031] protein transport; [GO:0040007] gro…	GO:0005834 heterotrimeric G-protein complex;GO:1905360 GTPase complex;GO:0031234 extrinsic component of cytoplasmic side of plasma membrane	GO:0051430 corticotropin-releasing hormone receptor 1 binding;GO:0031852 mu-type opioid receptor binding;GO:0010856 adenylate cyclase activator activity		Predicted intracellular proteins; Transporters:Accessory Factors Involved in Transport; Disease related genes; Cancer-related genes:Candidate cancer biomarkers; Cancer-related genes:Mutational cancer driver genes; Potential drug targets	[IPR009434] Neuroendocrine secretory protein 55; [IPR000367] G-protein alpha subunit, group S; [IPR001019] Guanine nucleotide binding protein (G-protein), alpha subunit; [IPR011025] G protein alpha subunit, helical insertion; [IPR027417] P-loop containing nucleoside triphosphate hydrolase	Nucleoplasm (reliability']); Additional: Cytosol;Plasma membrane	yes						yes	MP:0005367 renal/urinary system phenotype; MP:0005370 liver/biliary system phenotype; MP:0005385 cardiovascular system phenotype; MP:0010768 mortality/aging; MP:0005369 muscle phenotype; MP:0005376 homeostasis/metabolism phenotype; MP:0005384 cellular phenotype; MP:0005378 growth/size/body region phenotype; MP:0005386 behavior/neurological phenotype; MP:0005387 immune system phenotype; MP:0003631…	[ORPHA:189427] Cushing syndrome due to macronodular adrenal hyperplasia; [ORPHA:57782] Mazabraud syndrome; [ORPHA:562] McCune-Albright syndrome; [ORPHA:93277] Monostotic fibrous dysplasia; [ORPHA:93276] Polyostotic fibrous dysplasia; [ORPHA:2762] Progressive osseous heteroplasia; [ORPHA:79443] Pseudohypoparathyroidism type 1A; [ORPHA:94089] Pseudohypoparathyroidism type 1B; [ORPHA:79444] Pseudohy…	OMIM ID:139320 Gnas complex locus	Pseudohypoparathyroidism; Intellectual disability; Global developmental delay; Subcutaneous calcification; Pseudopseudohypoparathyroidism; not specified; Inborn genetic diseases; Pseudohypoparathyroidism type 1B; PITUITARY ADENOMA 3, MULTIPLE TYPES; Cushing's syndrome; Pseudohypoparathyroidism type 1C; Progressive osseous heteroplasia; McCune-Albright syndrome; Obesity; Brachydactyly; Cognitive i…	Albumins;Anthropometry;Body Fat Distribution;Body Weight;Cryptoxanthins	Biomarkers;Blood Urea Nitrogen;Brain Waves;Bronchodilator Agents;Lung Volume Measurements;Waist Circumference	[219080] ACTH-INDEPENDENT MACRONODULAR ADRENAL HYPERPLASIA; [103580] ALBRIGHT HEREDITARY OSTEODYSTROPHY; [139320] GNAS hyperfunction; [603233] Pseudohypoparathyroidism type 1B	Adenocarcinoma of stomach: likely pathogenic,pathogenic; Adrenocortical carcinoma: likely pathogenic,pathogenic; Clinvar: phenotype not specified: likely pathogenic,pathogenic,uncertain significance; Cushings syndrome: likely pathogenic,pathogenic; Hepatocellular carcinoma: likely pathogenic,pathogenic; Inborn genetic diseases: likely pathogenic,pathogenic; Lung adenocarcinoma: likely pathogenic,…	HP:0005605:Large cafe-au-lait macules with irregular margins; HP:0010027:Broad 1st metacarpal; HP:0025027:Osteoma cutis; HP:0010735:Polyostotic fibrous dysplasia; HP:0010734:Fibrous dysplasia of the bones; HP:0005700:Increased bone density with cystic changes; HP:0011987:Ectopic ossification in muscle tissue; HP:0008227:Pituitary resistance to thyroid hormone; HP:0008231:Macronodular adrenal hype…	Colforsin; 2',5'-DIDEOXY-ADENOSINE 3'-MONOPHOSPHATE	Brachymetacarpia; Broad 1st metacarpal; Cellular Myxoma; Fibrous Dysplasia, Monostotic; PITUITARY ADENOMA 3, MULTIPLE TYPES; PITUITARY TUMOR 3, GROWTH HORMONE-SECRETING, SOMATIC; POLYOSTOTIC FIBROUS DYSPLASIA, SOMATIC, MOSAIC; PSEUDOHYPOPARATHYROIDISM, TYPE IA, WITH TESTOTOXICOSIS; Pseudohypothyroidism; Abnormality of the parathyroid gland; Choroid plexus calcification; Colorectal Villous Adenoma…	367	544	[{"UniProt":"P63092","EnsemblGene":["ENSG00000087460"],"RefSeq":[["NM_001077490","NP_001070958","REVIEWED"],["NM_001309840","NP_001296769","REVIEWED"],["NM_080425","NP_536350","REVIEWED"]],"UCSC":["uc002yaa.4"],"SwissProt":["GNAS2_HUMAN"]},{"UniProt":"P84996","EnsemblGene":["ENSG00000087460"],"EnsemblTrans":[["ENST00000306120","ENSP00000302237",""]],"RefSeq":[["NM_001077490","NP_001070958","REVIE…	tongue	Distribution: Detected in all; Specificity: Tissue enhanced	Membranous and cytoplasmic expression in several different tissue types.; antibody: Most normal tissues displayed weak to moderate cytoplasmic positivity. Glial cells in CNS, glandular cells in thyroid and myocytes showed strong cytoplasmic staining.	Antibody: Most cancer tissues showed weak cytoplasmic positivity. Malignant gliomas and renal cancers showed moderate to strong positivity. Melanoma thyroid, breast, ovarian and urothelial cancers were moderately stained in several cases.		(ko04962)Vasopressin-regulated water reabsorption; (ko05030)Cocaine addiction; (hsa04962)Vasopressin-regulated water reabsorption	(M00695)cAMP signaling; (hsa)cAMP signaling		(M5910)HALLMARK PROTEIN SECRETION	(M19829)BIOCARTA AGPCR PATHWAY; (M7772)BIOCARTA BARRESTIN PATHWAY; (M668)BIOCARTA BARR MAPK PATHWAY
Oncogene	GLI1	2735	GLI|PAPA8|PPD1	GLI family zinc finger 1	This gene encodes a member of the Kruppel family of zinc finger proteins. The encoded transcription factor is activated by the sonic hedgehog signal transduction cascade and regulates stem cell proliferation. The activity and nuclear localization of this protein is negatively regulated by p53 in an inhibitory loop. Multiple transcript variants encoding different isoforms have been found for this …	chr12:57459785-57472451	GO:0060032 notochord regression;GO:0007418 ventral midline development;GO:0021938 smoothened signaling pathway involved in regulation of cerebellar granule cell precursor cell proliferation	[GO:0003674] molecular_function; [GO:0003677] DNA binding; [GO:0005575] cellular_component; [GO:0005737] cytoplasm; [GO:0005622] intracellular; [GO:0007165] signal transduction; [GO:0008150] biological_process; [GO:0048856] anatomical structure development; [GO:0008283] cell population proliferation; [GO:0040007] growth; [GO:0043226] organelle; [GO:0005634] nucleus; [GO:0043167] ion binding; [GO:…	GO:0097546 ciliary base;GO:0097542 ciliary tip;GO:0005930 axoneme	GO:0008017 microtubule binding;GO:0015631 tubulin binding;GO:0003682 chromatin binding		Transcription factors:Zinc-coordinating DNA-binding domains; Predicted intracellular proteins	[IPR013087] Zinc finger C2H2-type; [IPR032850] Zinc finger protein GLI1; [IPR036236] Zinc finger C2H2 superfamily	Cytosol;Nucleoplasm (reliability'])									[ORPHA:289] Ellis Van Creveld syndrome; [ORPHA:93339] Polydactyly of a biphalangeal thumb; [ORPHA:93334] Postaxial Polydactyly Type A; [ORPHA:93335] Postaxial polydactyly type B	OMIM ID:165220 Gli family zinc finger 1	not specified; POLYDACTYLY, POSTAXIAL, TYPE A8					HP:0005895:Radial deviation of thumb terminal phalanx; HP:0011830:Abnormal oral mucosa morphology; HP:0001241:Capitate-hamate fusion; HP:0011065:Conical incisor; HP:0009944:Partial duplication of thumb phalanx; HP:0008921:Neonatal short-limb short stature; HP:0005561:Abnormality of bone marrow cell morphology; HP:0000190:Abnormal oral frenulum morphology; HP:0005048:Synostosis of carpal bones; HP…		Necrobiosis Lipoidica Diabeticorum; POLYDACTYLY, POSTAXIAL, TYPE A8; Follicular atrophoderma and basal cell epitheliomata; Cutaneous sarcoidosis; Malignant Ameloblastoma; Radial deviation of thumb terminal phalanx; Tongue absent; Retinal Perforations; Abnormal oral mucosa morphology; Congenital Ureteropelvic Junction Obstruction; Fluoride Poisoning; Microphthalmia, syndromic 2; Myxofibroma; BRACH…	332	384	[{"UniProt":"P08151","EnsemblGene":["ENSG00000111087"],"SwissProt":["GLI1_HUMAN"]},{"UniProt":"B4DNF7","RefSeq":[["NM_001160045","NP_001153517","REVIEWED"]],"SwissProt":["B4DNF7_HUMAN"]}]	muscle	Distribution: Detected in many; Specificity: Low tissue specificity	Cytoplasmic expression in several tissues.; antibody: Strong cytoplasmic staining was observed in immature spermatids while mature spermatides showed strong nuclear positivity. Moderate cytoplasmic immunoreactivity was observed in intestinal tract, adrenal glands and Leydig cells. A fraction of glial cells showed moderate nuclear staining. Remaining normal tissues were weakly stained or negative.	Antibody: Cancer tissues generally showed weak cytoplasmic staining or were negative.	(M219)PID HEDGEHOG GLI PATHWAY	(ko04340)Hedgehog signaling pathway; (hsa04340)Hedgehog signaling pathway; (ko05217)Basal cell carcinoma	(hsa)Hedgehog signaling; (M00678)Hedgehog signaling		(M5919)HALLMARK HEDGEHOG SIGNALING	(M11792)BIOCARTA SHH PATHWAY
Oncogene	SETBP1	26040	MRD29|SEB	SET binding protein 1	This gene encodes a protein which contains a several motifs including a ski homology region and a SET-binding region in addition to three nuclear localization signals. The encoded protein has been shown to bind the SET nuclear oncogene which is involved in DNA replication. Mutations in this gene are associated with Schinzel-Giedion midface retraction syndrome. Multiple transcript variants encodin…	chr18:44680072-45068510		[GO:0005575] cellular_component; [GO:0005622] intracellular; [GO:0043226] organelle; [GO:0005634] nucleus; [GO:0005654] nucleoplasm; [GO:0005737] cytoplasm; [GO:0005829] cytosol; [GO:0003674] molecular_function; [GO:0003677] DNA binding	GO:0016604 nuclear body;GO:0044451 nucleoplasm part;GO:0005654 nucleoplasm	GO:0003677 DNA binding;GO:0003676 nucleic acid binding;GO:1901363 heterocyclic compound binding		Predicted intracellular proteins; Disease related genes; Cancer-related genes	[IPR017956] AT hook, DNA-binding motif	Nucleoplasm (reliability']); Additional: Cytosol;Nuclear bodies								MP:0010768 mortality/aging; MP:0005376 homeostasis/metabolism phenotype; MP:0005386 behavior/neurological phenotype; MP:0003631 nervous system phenotype	[ORPHA:436151] Intellectual disability-expressive aphasia-facial dysmorphism syndrome; [ORPHA:798] Schinzel-Giedion syndrome	OMIM ID:611060 Set-binding protein 1	Mental retardation, autosomal dominant 29; Febrile seizures; Intellectual disability; Lymphoma; Hydronephrosis; Cerebral atrophy; Teratoma; Atrial septal defect; Hypospadias, penile; Abnormality of the nail; Large fontanelles; Midface retrusion; Inborn genetic diseases; Schinzel-Giedion syndrome; SETBP1-Related Disorder; Chronic myelogenous leukemia, BCR-ABL1 positive	Child Development Disorders, Pervasive;Creatinine;Diabetes Mellitus;Diabetes Mellitus, Type 2;Hand Strength;Insulin-Like Growth Factor I;Personality;Platelet Function Tests	Blood Platelets;Coronary Aneurysm;Electrocardiography;Hair Color;Mucocutaneous Lymph Node Syndrome;Thrombosis	[No disease mim] Developmental and expressive language delay; [269150] Schinzel-Giedion midface retraction syndrome	Atrial septal defect: likely pathogenic; Chronic myelogenous leukemia: not provided,pathogenic; Clinvar: phenotype not specified: likely pathogenic,not provided,pathogenic; Inborn genetic diseases: pathogenic; Mental retardation, autosomal dominant 29: pathogenic; Setbp1-related disorder: not provided,pathogenic; Schinzel-giedion syndrome: likely pathogenic,not provided,pathogenic	HP:0005495:Metopic suture patent to nasal root; HP:0025259:Stiff elbow; HP:0008628:Abnormality of the stapes; HP:0006387:Wide distal femoral metaphysis; HP:0032075:Splenopancreatic fusion; HP:0006392:Increased density of long bones; HP:0009104:Aplasia/Hypoplasia of the pubic bone; HP:0045005:Neural tube defect; HP:0006657:Hypoplasia of first ribs; HP:0004554:Generalized hypertrichosis; HP:0008610…		Abnormality of the stapes; Increased density of long bones; MENTAL RETARDATION, AUTOSOMAL DOMINANT 29; Metopic suture patent to nasal root; Wide distal femoral metaphysis; Aplasia/Hypoplasia of the pubic bone; Elbow stiff; Hypoplasia of first ribs; Myelodysplastic syndrome, no ICD-O subtype; Hypoplasia of the epiglottis; Schinzel-Giedion syndrome; Generalized hypertrichosis; Thickened cortex of l…	44	61	[{"UniProt":"Q9Y6X0","EnsemblGene":["ENSG00000152217"],"SwissProt":["SETBP_HUMAN"]}]		Distribution: Detected in all; Specificity: Low tissue specificity	Nuclear and cytoplasmic expression at variable levels in most cell types.; antibody: Strong cytoplasmic positivity was observed in hepatocytes, renal tubules and astrocytes in CNS. Stomach, exocrine pancreas, endometrial glands, seminiferous ducts and prostate showed moderate staining. Remaining normal tissues were negative.	Antibody: Hepatocellular carcinomas exhibited moderate to strong cytoplasmic positivity. Several prostate cancers and malignant gliomas showed moderate staining. The rest of the tumors were negative.
Oncogene	WWTR1	25937	TAZ	WW domain containing transcription regulator 1		chr3:149724788-149517235	GO:0072257 metanephric nephron tubule epithelial cell differentiation;GO:0072307 regulation of metanephric nephron tubule epithelial cell differentiation;GO:0072182 regulation of nephron tubule epithelial cell differentiation	[GO:0003674] molecular_function; [GO:0005575] cellular_component; [GO:0005737] cytoplasm; [GO:0005622] intracellular; [GO:0007165] signal transduction; [GO:0008150] biological_process; [GO:0007267] cell-cell signaling; [GO:0006464] cellular protein modification process; [GO:0043226] organelle; [GO:0005634] nucleus; [GO:0005654] nucleoplasm; [GO:0005829] cytosol; [GO:0034641] cellular nitrogen com…	GO:0005667 transcription factor complex;GO:0016604 nuclear body;GO:0044451 nucleoplasm part	GO:0003714 transcription corepressor activity;GO:0003713 transcription coactivator activity;GO:0003712 transcription coregulator activity		Predicted intracellular proteins; Cancer-related genes	[IPR001202] WW domain; [IPR036020] WW domain superfamily	Nuclear bodies;Nucleoplasm (reliability']); Additional: Cytosol						principal1		MP:0005367 renal/urinary system phenotype; MP:0005385 cardiovascular system phenotype; MP:0010768 mortality/aging; MP:0005376 homeostasis/metabolism phenotype; MP:0005384 cellular phenotype; MP:0005378 growth/size/body region phenotype; MP:0005386 behavior/neurological phenotype; MP:0005381 digestive/alimentary phenotype; MP:0005387 immune system phenotype; MP:0005389 reproductive system phenotyp…	[ORPHA:157791] Epithelioid hemangioendothelioma	OMIM ID:607392 Ww domain-containing transcription regulator 1		Behcet Syndrome;Child Development Disorders, Pervasive;Erythrocyte Indices;Platelet Function Tests;Proteins	Pre-Eclampsia		3-methylglutaconic aciduria type 2: likely pathogenic,pathogenic,uncertain significance; Cardiovascular phenotype: pathogenic; Caused by mutation in the tafazzin gene: pathogenic,uncertain significance; Clinvar: phenotype not specified: likely pathogenic,pathogenic,uncertain significance			Lump on thigh; Choreoathetosis, Hypothyroidism, And Neonatal Respiratory Distress; Cutaneous Fibrous Histiocytoma, Epithelioid Variant; Poroma; Eccrine Poroma; Neurogenic Muscular Atrophy; Ossifying fibromyxoid tumor; Thyroid Dysgenesis; Adult Epithelioid Hemangioendothelioma; Childhood Epithelioid Hemangioendothelioma; Hemangioendothelioma; Adult Undifferentiated Pleomorphic Sarcoma; Childhood U…	256	295	[{"UniProt":"Q9GZV5","EnsemblGene":["ENSG00000018408"],"EnsemblTrans":[["ENST00000360632","ENSP00000353847","principal1"],["ENST00000465804","ENSP00000419465","principal1"],["ENST00000467467","ENSP00000419234","principal1"]],"RefSeq":[["NM_001168278","NP_001161750","VALIDATED"],["NM_001168280","NP_001161752","VALIDATED"],["NM_001348362","NP_001335291","VALIDATED"],["NM_015472","NP_056287","VALIDA…		Distribution: Detected in many; Specificity: Low tissue specificity	Ubiquitous nuclear expression.; antibody: Most normal tissue cells showed moderate to strong cytoplasmic immunoreactivity with additional nuclear positivity in a few cases. Cilia were distinctly stained in airway epithelium, epididymis and fallopian tube.	Antibody: Cancer tissues showed cytoplasmic and nuclear staining of varying intensity.		(ko04392)Hippo signaling pathway -multiple species; (hsa04392)Hippo signaling pathway - multiple species; (hsa00564)Glycerophospholipid metabolism	(M00683)Hippo signaling; (hsa)Hippo signaling		(M5896)HALLMARK TGF BETA SIGNALING; (M5909)HALLMARK MYOGENESIS
Oncogene	LETMD1	25875	1110019O13Rik|HCCR|HCCR-1|HCCR-2|HCCR1|HCCR2|HCRR-2|SLC55A3	LETM1 domain containing 1	This gene encodes a mitochondrial outer membrane protein. It has a potential role in tumorigenesis, which may result from negative regulation of the p53 tumor suppressor gene. Alternatively spliced transcript variants have been noted for this gene. [provided by RefSeq, Aug 2011]	chr12:51048220-51068958		[GO:0003674] molecular_function; [GO:0005575] cellular_component; [GO:0005622] intracellular; [GO:0043226] organelle; [GO:0005634] nucleus; [GO:0005654] nucleoplasm; [GO:0005730] nucleolus; [GO:0005737] cytoplasm; [GO:0005739] mitochondrion	GO:0005741 mitochondrial outer membrane;GO:0031968 organelle outer membrane;GO:0019867 outer membrane	GO:0043022 ribosome binding;GO:0043021 ribonucleoprotein complex binding;GO:0044877 protein-containing complex binding		Predicted intracellular proteins	[IPR011685] LETM1-like; [IPR033122] Letm1 ribosome-binding domain	Mitochondria (reliability']); Additional: Nucleoli;Nucleoplasm			yes	yes			yes											Refractory cancer; Neoplasm, Residual; Acute leukemia; Adult Acute Lymphocytic Leukemia; Childhood Acute Lymphoblastic Leukemia; Solid Neoplasm; Acute lymphocytic leukemia; Adult Liver Carcinoma; Liver and Intrahepatic Biliary Tract Carcinoma; Malignant neoplasm of liver; Malignant tumor of cervix; Childhood Leukemia; cervical cancer; Cervix carcinoma; Squamous cell carcinoma of esophagus; leukem…	21	39	[{"UniProt":"F8W1Z2","EnsemblGene":["ENSG00000050426"],"EnsemblTrans":[["ENST00000547008","ENSP00000447419",""]],"RefSeq":[["NM_001300765","NP_001287694","REVIEWED"]],"UCSC":["uc058oap.1"],"SwissProt":["F8W1Z2_HUMAN"]},{"UniProt":"Q6P1Q0","EnsemblGene":["ENSG00000050426"],"RefSeq":[["XM_006719339","XP_006719402"]],"SwissProt":["LTMD1_HUMAN"]},{"UniProt":"A0A384P5D7","RefSeq":[["NM_015416","NP_056…		Distribution: Detected in all; Specificity: Low tissue specificity
Oncogene	FUS	2521	ALS6|ETM4|FUS1|HNRNPP2|POMP75|TLS	FUS RNA binding protein	This gene encodes a multifunctional protein component of the heterogeneous nuclear ribonucleoprotein (hnRNP) complex. The hnRNP complex is involved in pre-mRNA splicing and the export of fully processed mRNA to the cytoplasm. This protein belongs to the FET family of RNA-binding proteins which have been implicated in cellular processes that include regulation of gene expression, maintenance of ge…	chr16:31180110-31194871	GO:1905168 positive regulation of double-strand break repair via homologous recombination;GO:2000781 positive regulation of double-strand break repair;GO:0045911 positive regulation of DNA recombination	[GO:0008150] biological_process; [GO:0034641] cellular nitrogen compound metabolic process; [GO:0009058] biosynthetic process; [GO:0003674] molecular_function; [GO:0003723] RNA binding; [GO:0005575] cellular_component; [GO:0005622] intracellular; [GO:0043226] organelle; [GO:0005634] nucleus; [GO:0043167] ion binding; [GO:0005654] nucleoplasm; [GO:0003677] DNA binding; [GO:0065003] protein-contain…	GO:0044327 dendritic spine head;GO:0005844 polysome;GO:0043204 perikaryon	GO:0031489 myosin V binding;GO:0046965 retinoid X receptor binding;GO:0042974 retinoic acid receptor binding		Predicted intracellular proteins; Disease related genes; Cancer-related genes	[IPR000504] RNA recognition motif domain; [IPR001876] Zinc finger, RanBP2-type; [IPR012677] Nucleotide-binding alpha-beta plait domain superfamily; [IPR034459] RNA-binding protein FUS; [IPR034870] TAF15/EWS/TLS family; [IPR035979] RNA-binding domain superfamily; [IPR036443] Zinc finger, RanBP2-type superfamily	Nucleoplasm (reliability'])					yes			MP:0010768 mortality/aging; MP:0005376 homeostasis/metabolism phenotype; MP:0005384 cellular phenotype; MP:0005378 growth/size/body region phenotype; MP:0005386 behavior/neurological phenotype; MP:0005387 immune system phenotype; MP:0005389 reproductive system phenotype; MP:0003631 nervous system phenotype; MP:0005397 hematopoietic system phenotype; MP:0005379 endocrine/exocrine gland phenotype; …	[ORPHA:803] Amyotrophic lateral sclerosis; [ORPHA:275872] Frontotemporal dementia with motor neuron disease; [ORPHA:300605] Juvenile amyotrophic lateral sclerosis; [ORPHA:79105] Myxofibrosarcoma; [ORPHA:99967] Myxoid/round cell liposarcoma; [ORPHA:862] NON RARE IN EUROPE: Hereditary essential tremor	OMIM ID:137070 Fused in sarcoma	Amyotrophic lateral sclerosis 6, with or without frontotemporal dementia; Juvenile amyotrophic lateral sclerosis; Tremor, hereditary essential, 4; Inborn genetic diseases; Amyotrophic lateral sclerosis 6, autosomal recessive	Platelet Function Tests			Amyotrophic lateral sclerosis 6, autosomal recessive: pathogenic; Amyotrophic lateral sclerosis type 6: pathogenic,uncertain significance; Clinvar: phenotype not specified: likely pathogenic,pathogenic,uncertain significance; Inborn genetic diseases: pathogenic; Tremor, hereditary essential, 4: pathogenic,uncertain significance	HP:0002193:Pseudobulbar behavioral symptoms; HP:0000014:Abnormality of the bladder; HP:0007190:Neuronal loss in the cerebral cortex; HP:0008322:Abnormal mitochondrial morphology; HP:0030223:Perseveration; HP:0002385:Paraparesis; HP:0002442:Dyscalculia; HP:0002579:Gastrointestinal dysmotility; HP:0000605:Supranuclear gaze palsy; HP:0002127:Abnormal upper motor neuron morphology; HP:0002145:Frontot…		Amyotrophic Lateral Sclerosis 6, Autosomal Recessive; Amyotrophic lateral sclerosis, type 6; Spindle Cell/Sclerosing Rhabdomyosarcoma; TREMOR, HEREDITARY ESSENTIAL, 4; Low Grade Fibromyxoid Sarcoma with Giant Collagen Rosettes; Unresectable Soft Tissue Sarcoma; Vertebral osteoporosis; Myxoid liposarcoma metastatic; Ewing's sarcoma recurrent; Pseudobulbar behavioral symptoms; FRONTOTEMPORAL LOBAR …	319	476	[{"UniProt":"P35637","EnsemblGene":["ENSG00000089280"],"SwissProt":["FUS_HUMAN"]},{"UniProt":"Q6IBQ5","RefSeq":[["NM_004960","NP_004951","REVIEWED"]],"UCSC":["uc002ebf.3"],"SwissProt":["Q6IBQ5_HUMAN"]},{"UniProt":"Q13344","RefSeq":[["NM_001170937","NP_001164408","REVIEWED"]],"SwissProt":["Q13344_HUMAN"]}]		Distribution: Detected in all; Specificity: Low tissue specificity	Ubiquitous nuclear expression.; antibody: Strong nuclear staining was found in most normal cells. Hepatocytes were negative.	Antibody: Most malignant cells showed strong nuclear positivity.		(ko05202)Transcriptional misregulation in cancer; (hsa05202)Transcriptional misregulation in cancer			(M5922)HALLMARK UNFOLDED PROTEIN RESPONSE
Oncogene	PATZ1	23598	MAZR|PATZ|RIAZ|ZBTB19|ZNF278|ZSG|dJ400N23	POZ/BTB and AT hook containing zinc finger 1	The protein encoded by this gene contains an A-T hook DNA binding motif which usually binds to other DNA binding structures to play an important role in chromatin modeling and transcription regulation. Its Poz domain is thought to function as a site for protein-protein interaction and is required for transcriptional repression, and the zinc-fingers comprise the DNA binding domain. Since the encod…	chr22:31346346-31325804	GO:0008584 male gonad development;GO:0046546 development of primary male sexual characteristics;GO:0046661 male sex differentiation	[GO:0008150] biological_process; [GO:0034641] cellular nitrogen compound metabolic process; [GO:0009058] biosynthetic process; [GO:0003674] molecular_function; [GO:0005575] cellular_component; [GO:0005622] intracellular; [GO:0043226] organelle; [GO:0005634] nucleus; [GO:0043167] ion binding; [GO:0005654] nucleoplasm; [GO:0003677] DNA binding; [GO:0003700] DNA-binding transcription factor activity…	GO:0005654 nucleoplasm;GO:0031981 nuclear lumen;GO:0044428 nuclear part	GO:0001227 DNA-binding transcription repressor activity, RNA polymerase II-specific;GO:0001228 DNA-binding transcription activator activity, RNA polymerase II-specific;GO:0003682 chromatin binding		Predicted intracellular proteins; Disease related genes; Transcription factors:Zinc-coordinating DNA-binding domains; Cancer-related genes	[IPR000210] BTB/POZ domain; [IPR000637] HMG-I/HMG-Y, DNA-binding, conserved site; [IPR011333] SKP1/BTB/POZ domain superfamily; [IPR013087] Zinc finger C2H2-type; [IPR036236] Zinc finger C2H2 superfamily	Nucleoplasm (reliability'])								MP:0005385 cardiovascular system phenotype; MP:0010768 mortality/aging; MP:0005384 cellular phenotype; MP:0005378 growth/size/body region phenotype; MP:0005387 immune system phenotype; MP:0005389 reproductive system phenotype; MP:0003631 nervous system phenotype; MP:0005397 hematopoietic system phenotype; MP:0005379 endocrine/exocrine gland phenotype; MP:0005380 embryo phenotype		OMIM ID:605165 Zinc finger protein 278		Platelet Function Tests						Glioneuronal tumor; Round cell sarcoma; Adenomatous goiter; Adult Desmoplastic Small Round Cell Tumor; Childhood Desmoplastic Small Round Cell Tumor; Desmoplastic Small Round Cell Tumor; Sarcoma, Spindle Cell; Ganglioglioma; Testicular Neoplasms; Primary differentiated carcinoma of thyroid gland; Reticulocyte count (procedure); Differentiated Thyroid Gland Carcinoma; Clear-cell metastatic renal c…	18	46	[{"UniProt":"Q9HBE1","EnsemblGene":["ENSG00000100105"],"SwissProt":["PATZ1_HUMAN"]},{"UniProt":"A0A024R1F8","RefSeq":[["NM_032050","NP_114439","REVIEWED"]],"SwissProt":["A0A024R1F8_HUMAN"]},{"UniProt":"A0A024R1H7","RefSeq":[["NM_032052","NP_114441","REVIEWED"]],"SwissProt":["A0A024R1H7_HUMAN"]},{"UniProt":"A0A024R1M5","RefSeq":[["NM_014323","NP_055138","REVIEWED"]],"SwissProt":["A0A024R1M5_HUMAN"…		Distribution: Detected in all; Specificity: Low tissue specificity	Ubiquitous nuclear expression.; antibody: Normal tissues displayed moderate to strong nuclear staining with additional cytoplasmic positivity in several tissues.	Antibody: Cancer tissues displayed moderate to strong nuclear staining with additional cytoplasmic positivity in few tissues. Several cases of renal cancers were weakly stained or negative.	(M58)PID AR PATHWAY					(M6924)BIOCARTA EIF2 PATHWAY
Oncogene	FOS	2353	AP-1|C-FOS|p55	Fos proto-oncogene, AP-1 transcription factor subunit	The Fos gene family consists of 4 members: FOS, FOSB, FOSL1, and FOSL2. These genes encode leucine zipper proteins that can dimerize with proteins of the JUN family, thereby forming the transcription factor complex AP-1. As such, the FOS proteins have been implicated as regulators of cell proliferation, differentiation, and transformation. In some cases, expression of the FOS gene has also been a…	chr14:75278828-75282230	GO:0001661 conditioned taste aversion;GO:0009629 response to gravity;GO:0035994 response to muscle stretch	[GO:0003674] molecular_function; [GO:0003677] DNA binding; [GO:0008150] biological_process; [GO:0034641] cellular nitrogen compound metabolic process; [GO:0009058] biosynthetic process; [GO:0003700] DNA-binding transcription factor activity; [GO:0005575] cellular_component; [GO:0005622] intracellular; [GO:0032991] protein-containing complex; [GO:0007165] signal transduction; [GO:0043226] organell…	GO:0035976 transcription factor AP-1 complex;GO:0090575 RNA polymerase II transcription factor complex;GO:0044798 nuclear transcription factor complex	GO:0070412 R-SMAD binding;GO:0000979 RNA polymerase II core promoter sequence-specific DNA binding;GO:0001046 core promoter sequence-specific DNA binding		Transcription factors:Basic domains; Cancer-related genes:Candidate cancer biomarkers; Predicted intracellular proteins	[IPR000837] AP-1 transcription factor; [IPR004827] Basic-leucine zipper domain; [IPR029816] c-Fos/v-Fos	Nucleoplasm (reliability'])								MP:0010768 mortality/aging; MP:0005376 homeostasis/metabolism phenotype; MP:0005384 cellular phenotype; MP:0005378 growth/size/body region phenotype; MP:0005386 behavior/neurological phenotype; MP:0005381 digestive/alimentary phenotype; MP:0005387 immune system phenotype; MP:0002006 neoplasm; MP:0005389 reproductive system phenotype; MP:0003631 nervous system phenotype; MP:0005391 vision/eye phen…	[ORPHA:528] Berardinelli-Seip congenital lipodystrophy	OMIM ID:164810 V-fos fbj murine osteosarcoma viral oncogene homolog		Body Mass Index	Crohn Disease;Inflammatory Bowel Diseases			HP:0012084:Abnormality of skeletal muscle fiber size; HP:0003414:Atlantoaxial dislocation; HP:0003635:Loss of subcutaneous adipose tissue in limbs; HP:0000163:Abnormal oral cavity morphology; HP:0100607:Dysmenorrhea; HP:0100545:Arterial stenosis; HP:0000845:Growth hormone excess; HP:0001714:Ventricular hypertrophy; HP:0003712:Skeletal muscle hypertrophy; HP:0002621:Atherosclerosis; HP:0012062:Bon…	Nadroparin	Bone Epithelioid Hemangioma; Cycloid psychosis; Fibrocartilaginous Dysplasia of Bone; Fibrocystic Dysplasia of Bone; Epithelioid hemangioma of skin; Rainbow Trout Hepatoma; Chondrogenic Neoplasm; Aberrant Crypt Foci; Abnormality of skeletal muscle fiber size; Benign bone neoplasm; Enterobacteriaceae Infections; Osteoid osteoma; Lipoatrophic Diabetes Mellitus; Loss of subcutaneous adipose tissue i…	256	459	[{"UniProt":"P01100","EnsemblGene":["ENSG00000170345"],"SwissProt":["FOS_HUMAN"]},{"UniProt":"Q6FG41","RefSeq":[["NM_005252","NP_005243","REVIEWED"]],"UCSC":["uc001xrn.4"],"SwissProt":["Q6FG41_HUMAN"]}]	soft_tissue	Distribution: Detected in all; Specificity: Low tissue specificity	antibody: Most normal cells showed weak to moderate nuclear staining. Strong staining was observed in squamous epithelial cells, gall bladder, endocrine glands, placenta and urothelium.; Nuclear and cytoplasmic expression most tissues.	Antibody: Weak to moderate nuclear positivity was observed in most cancer tissues. A majority of urothelial cancer tissues as well as a several cervical, skin and pancreatic cancer tissues were strongly stained. Lymphomas were negative.	(M134)PID TCR RAS PATHWAY; (M206)PID PDGFRA PATHWAY; (M17200)SA B CELL RECEPTOR COMPLEXES	(ko05210)Colorectal cancer; (ko05031)Amphetamine addiction; (hsa05031)Amphetamine addiction			(M5941)HALLMARK UV RESPONSE UP; (M5890)HALLMARK TNFA SIGNALING VIA NFKB; (M5891)HALLMARK HYPOXIA	(M22039)BIOCARTA TSP1 PATHWAY; (M18899)BIOCARTA DREAM PATHWAY; (M2602)BIOCARTA RANKL PATHWAY
Oncogene	SUZ12	23512	CHET9|IMMAS|JJAZ1	SUZ12 polycomb repressive complex 2 subunit	This zinc finger gene has been identified at the breakpoints of a recurrent chromosomal translocation reported in endometrial stromal sarcoma. Recombination of these breakpoints results in the fusion of this gene and JAZF1. The protein encoded by this gene contains a zinc finger domain in the C terminus of the coding region. [provided by RefSeq, Jul 2009]	chr17:31937007-32001040	GO:0070734 histone H3-K27 methylation;GO:0070317 negative regulation of G0 to G1 transition;GO:0070316 regulation of G0 to G1 transition	[GO:0003674] molecular_function; [GO:0005575] cellular_component; [GO:0005622] intracellular; [GO:0043226] organelle; [GO:0005634] nucleus; [GO:0043167] ion binding; [GO:0005654] nucleoplasm; [GO:0005730] nucleolus; [GO:0008150] biological_process; [GO:0051276] chromosome organization; [GO:0003677] DNA binding; [GO:0032991] protein-containing complex; [GO:0007049] cell cycle; [GO:0030154] cell di…	GO:0001739 sex chromatin;GO:0035098 ESC/E(Z) complex;GO:0000803 sex chromosome	GO:0046976 histone methyltransferase activity (H3-K27 specific);GO:0018024 histone-lysine N-methyltransferase activity;GO:1990841 promoter-specific chromatin binding		Disease related genes; Cancer-related genes:Mutational cancer driver genes; Predicted intracellular proteins	[IPR019135] Polycomb protein, VEFS-Box	Nuclear bodies;Nucleoli;Nucleoplasm (reliability'])					yes	principal3		MP:0010768 mortality/aging; MP:0005384 cellular phenotype; MP:0005378 growth/size/body region phenotype; MP:0005386 behavior/neurological phenotype; MP:0005387 immune system phenotype; MP:0002006 neoplasm; MP:0003631 nervous system phenotype; MP:0005390 skeleton phenotype; MP:0005397 hematopoietic system phenotype; MP:0005380 embryo phenotype	[ORPHA:213711] Endometrial stromal sarcoma; [ORPHA:3447] Weaver syndrome	OMIM ID:606245 Suz12 polycomb repressive complex 2 subunit	IMAGAWA-MATSUMOTO SYNDROME		Body Mass Index;Hip	[No disease mim] Weaver-like overgrowth syndrome		HP:0001814:Deep-set nails; HP:0001816:Thin nail; HP:0010300:Abnormally low-pitched voice; HP:0001769:Broad foot; HP:0001176:Large hands; HP:0002002:Deep philtrum; HP:0001800:Hypoplastic toenails; HP:0001582:Redundant skin; HP:0011304:Broad thumb; HP:0001852:Sandal gap; HP:0005616:Accelerated skeletal maturation; HP:0001609:Hoarse voice; HP:0002213:Fine hair; HP:0000098:Tall stature; HP:0000311:Ro…		Benign endometrial stromal neoplasm; Endometrial stromal nodule; Weaver-Like Syndrome; Deep-set nails; Schwannomatosis, Plexiform; Weaver syndrome; Endometrial Stromal Tumors; Thin nails; Abnormally low-pitched voice; Endometrial stromal sarcoma, high grade; Low Grade Endometrial Stromal Sarcoma; Uterine Corpus High Grade Endometrial Stromal Sarcoma; Abnormality of the respiratory system; Rhabdom…	67	186	[{"UniProt":"Q15022","EnsemblGene":["ENSG00000178691"],"EnsemblTrans":[["ENST00000322652","ENSP00000316578","principal3"]],"RefSeq":[["NM_015355","NP_056170","REVIEWED"]],"UCSC":["uc002hgs.3"],"SwissProt":["SUZ12_HUMAN"]},{"UniProt":"J3QQW9","EnsemblGene":["ENSG00000178691"],"EnsemblTrans":[["ENST00000580398","ENSP00000463936","alternative1"]],"RefSeq":[["NM_001321207","NP_001308136","REVIEWED"]]…	bone_marrow	Distribution: Detected in all; Specificity: Low tissue specificity	antibody: Gastrointestinal tract, squamous epithelium, hematopoietic cells and germinal center cells in lymphoid tissues showed moderate nuclear positivity. Renal tubules showed cytoplasmic immunoreactivity. Other normal tissues were negative.; Low nuclear expression in several tissues.	Antibody: Head and neck cancers, majority of colorectal, urothelial, pancreatic, breast, ovarian cancers along with several endometrial cancers showed weak to moderate nuclear positivity. Remaining cancer tissues were weakly stained or negative.						(M22025)BIOCARTA PRC2 PATHWAY
Oncogene	FLT3	2322	CD135|FLK-2|FLK2|STK1	fms related receptor tyrosine kinase 3	This gene encodes a class III receptor tyrosine kinase that regulates hematopoiesis. This receptor is activated by binding of the fms-related tyrosine kinase 3 ligand to the extracellular domain, which induces homodimer formation in the plasma membrane leading to autophosphorylation of the receptor. The activated receptor kinase subsequently phosphorylates and activates multiple cytoplasmic effec…	chr13:28100587-28003274	GO:0002318 myeloid progenitor cell differentiation;GO:0035726 common myeloid progenitor cell proliferation;GO:0002328 pro-B cell differentiation	[GO:0003674] molecular_function; [GO:0043167] ion binding; [GO:0008150] biological_process; [GO:0006464] cellular protein modification process; [GO:0016301] kinase activity; [GO:0007165] signal transduction; [GO:0030154] cell differentiation; [GO:0048856] anatomical structure development; [GO:0002376] immune system process; [GO:0005575] cellular_component; [GO:0005737] cytoplasm; [GO:0005622] int…	GO:0005788 endoplasmic reticulum lumen;GO:0043235 receptor complex;GO:0044432 endoplasmic reticulum part	GO:0005021 vascular endothelial growth factor-activated receptor activity;GO:0035259 glucocorticoid receptor binding;GO:0043621 protein self-association	Tyr protein kinase family	CD markers; FDA approved drug targets:Small molecule drugs; Disease related genes; Cancer-related genes:Mutational cancer driver genes; Enzymes; Kinases:Tyr protein kinases; ENZYME proteins:Transferases; RAS pathway related proteins; Cancer-related genes:Mutated cancer genes	[IPR000719] Protein kinase domain; [IPR001245] Serine-threonine/tyrosine-protein kinase, catalytic domain; [IPR001824] Tyrosine-protein kinase, receptor class III, conserved site; [IPR007110] Immunoglobulin-like domain; [IPR008266] Tyrosine-protein kinase, active site; [IPR011009] Protein kinase-like domain superfamily; [IPR013151] Immunoglobulin; [IPR013783] Immunoglobulin-like fold; [IPR017441]…	Endoplasmic reticulum (reliability'])			yes	yes			yes	MP:0010768 mortality/aging; MP:0005376 homeostasis/metabolism phenotype; MP:0005384 cellular phenotype; MP:0005378 growth/size/body region phenotype; MP:0005387 immune system phenotype; MP:0002006 neoplasm; MP:0005390 skeleton phenotype; MP:0005397 hematopoietic system phenotype	[ORPHA:98834] Acute myeloblastic leukemia with maturation; [ORPHA:98833] Acute myeloblastic leukemia without maturation; [ORPHA:98829] Acute myeloid leukemia with abnormal bone marrow eosinophils inv16p13q22 or t16; [ORPHA:98832] Acute myeloid leukemia with minimal differentiation; [ORPHA:102724] Acute myeloid leukemia with t8; [ORPHA:530995] Mixed phenotype acute leukemia; [ORPHA:99860] Precurso…	OMIM ID:136351 Fms-related tyrosine kinase 3	Multiple myeloma; Acute myeloid leukemia; Acute lymphoid leukemia	Platelet Function Tests	Body Mass Index;Monocytes		Acute lymphoid leukemia: pathogenic; Acute myeloid leukemia: likely pathogenic,pathogenic; Myelodysplastic syndrome progressed to acute myeloid leukemia: pathogenic; Sunitinib response - toxicity/adr: drug response	HP:0006721:Acute lymphoblastic leukemia; HP:0010982:Polygenic inheritance; HP:0004808:Acute myeloid leukemia; HP:0001428:Somatic mutation; HP:0000006:Autosomal dominant inheritance	Sorafenib; Sunitinib; XL999; Tandutinib; ABT-869; Lestaurtinib; Midostaurin; Ponatinib; Nintedanib; Fostamatinib; Gilteritinib; Brigatinib; Fedratinib; Amuvatinib; Quizartinib; Pexidartinib	Chronic myeloid leukemia in lymphoid blast crisis; Acute myeloid leukemia with mutated CEBPA; Enterocolitis, Neutropenic; Mast cell malignancy; Wound sepsis; Adult Acute Myeloid Leukemia without Maturation; Neonatal leukaemia; Adult Acute Promyelocytic Leukemia with PML-RARA; MDS transformation; Myeloid/Lymphoid Neoplasms with Eosinophilia and Rearrangement of PDGFRA, PDGFRB, or FGFR1, or with PC…	624	696	[{"UniProt":"P36888","EnsemblGene":["ENSG00000122025"],"SwissProt":["FLT3_HUMAN"]}]	bone_marrow	Distribution: Detected in many; Specificity: Tissue enhanced				(ko05221)Acute myeloid leukemia; (ko05230)Central carbon metabolism in cancer; (hsa05221)Acute myeloid leukemia				(M9367)BIOCARTA ERYTH PATHWAY
Oncogene	FLI1	2313	BDPLT21|EWSR2|SIC-1	Fli-1 proto-oncogene, ETS transcription factor	This gene encodes a transcription factor containing an ETS DNA-binding domain. The gene can undergo a t(11;22)(q24;q12) translocation with the Ewing sarcoma gene on chromosome 22, which results in a fusion gene that is present in the majority of Ewing sarcoma cases. An acute lymphoblastic leukemia-associated t(4;11)(q21;q23) translocation involving this gene has also been identified. Alternative …	chr11:128685263-128813267	GO:0035855 megakaryocyte development;GO:0098751 bone cell development;GO:0061515 myeloid cell development	[GO:0008150] biological_process; [GO:0034641] cellular nitrogen compound metabolic process; [GO:0009058] biosynthetic process; [GO:0003674] molecular_function; [GO:0003700] DNA-binding transcription factor activity; [GO:0003677] DNA binding; [GO:0005575] cellular_component; [GO:0005622] intracellular; [GO:0043226] organelle; [GO:0005634] nucleus; [GO:0005654] nucleoplasm; [GO:0005737] cytoplasm; …	GO:0016604 nuclear body;GO:0044451 nucleoplasm part;GO:0000790 nuclear chromatin	GO:0001228 DNA-binding transcription activator activity, RNA polymerase II-specific;GO:0003682 chromatin binding;GO:0000978 RNA polymerase II proximal promoter sequence-specific DNA binding		Transcription factors:Helix-turn-helix domains; Disease related genes; Cancer-related genes; Predicted intracellular proteins	[IPR000418] Ets domain; [IPR035575] Friend leukemia integration 1 transcription factor; [IPR036388] Winged helix-like DNA-binding domain superfamily; [IPR036390] Winged helix DNA-binding domain superfamily; [IPR003118] Pointed domain; [IPR013761] Sterile alpha motif/pointed domain superfamily; [IPR035573] Friend leukemia integration 1 transcription factor, pointed domain	Nuclear bodies;Nucleoplasm (reliability'])								MP:0005370 liver/biliary system phenotype; MP:0005385 cardiovascular system phenotype; MP:0010768 mortality/aging; MP:0005369 muscle phenotype; MP:0005384 cellular phenotype; MP:0005378 growth/size/body region phenotype; MP:0005387 immune system phenotype; MP:0002006 neoplasm; MP:0003631 nervous system phenotype; MP:0005397 hematopoietic system phenotype; MP:0005379 endocrine/exocrine gland pheno…	[ORPHA:319] Ewing sarcoma; [ORPHA:370334] Extraskeletal Ewing sarcoma; [ORPHA:248340] Isolated delta-storage pool disease; [ORPHA:2308] Jacobsen syndrome; [ORPHA:851] Paris-Trousseau thrombocytopenia; [ORPHA:370348] Peripheral primitive neuroectodermal tumor	OMIM ID:193067 Friend leukemia virus integration 1	Bleeding disorder, platelet-type, 21; 11q partial monosomy syndrome; Thrombocytopenia; Bleeding disorder platelet type macrothrombocytopenia	Body Height;Body Mass Index;Platelet Function Tests	Arthritis, Rheumatoid;Lupus Erythematosus, Systemic;Lymphoma, Follicular;Myopia, Degenerative		Bleeding disorder platelet type macrothrombocytopenia: pathogenic; Bleeding disorder, platelet-type, 21: likely pathogenic,pathogenic; Clinvar: phenotype not specified: likely pathogenic	HP:0030067:Peripheral primitive neuroectodermal neoplasm; HP:0011932:Abnormality of the superior cerebellar peduncle; HP:0100849:Neoplasm of the scrotum; HP:0100711:Abnormality of the thoracic spine; HP:0031030:Elevated carcinoma antigen 125 level; HP:0012513:Upper limb pain; HP:0001965:Abnormality of the scalp; HP:0031501:Pelvic mass; HP:0030692:Brain neoplasm; HP:0001863:Toe clinodactyly; HP:00…		Abnormality of the superior cerebellar peduncle; BLEEDING DISORDER, PLATELET-TYPE, 21; Neoplasm of scrotum; Abnormality of the scalp; Abnormality of the thoracic spine; Elevated carcinoma antigen 125 level; Oesophageal fibrosis; Paris-Trousseau Thrombocytopenia; Pelvic mass; blastema predominant Wilms tumor; Central Nervous System Embryonal Neoplasm; Askin's tumor; Vascular fragility; Juvenile gr…	126	170	[{"UniProt":"Q01543","EnsemblGene":["ENSG00000151702"],"SwissProt":["FLI1_HUMAN"]},{"UniProt":"A0A024R3K4","RefSeq":[["NM_001271010","NP_001257939","REVIEWED"]],"SwissProt":["A0A024R3K4_HUMAN"]},{"UniProt":"A0A024R3M5","RefSeq":[["NM_002017","NP_002008","REVIEWED"]],"SwissProt":["A0A024R3M5_HUMAN"]},{"UniProt":"A0A024R3N6","RefSeq":[["NM_001167681","NP_001161153","REVIEWED"],["XM_011542701","XP_0…	blood	Distribution: Detected in all; Specificity: Tissue enhanced				(ko05202)Transcriptional misregulation in cancer; (hsa05202)Transcriptional misregulation in cancer
Oncogene	FES	2242	FPS	FES proto-oncogene, tyrosine kinase	This gene encodes the human cellular counterpart of a feline sarcoma retrovirus protein with transforming capabilities. The gene product has tyrosine-specific protein kinase activity and that activity is required for maintenance of cellular transformation. Its chromosomal location has linked it to a specific translocation event identified in patients with acute promyelocytic leukemia but it is al…	chr15:90884421-90895776	GO:0045657 positive regulation of monocyte differentiation;GO:2000251 positive regulation of actin cytoskeleton reorganization;GO:0045655 regulation of monocyte differentiation	[GO:0003674] molecular_function; [GO:0043167] ion binding; [GO:0008150] biological_process; [GO:0006464] cellular protein modification process; [GO:0016301] kinase activity; [GO:0005575] cellular_component; [GO:0005737] cytoplasm; [GO:0005622] intracellular; [GO:0005886] plasma membrane; [GO:0043226] organelle; [GO:0005856] cytoskeleton; [GO:0005794] Golgi apparatus; [GO:0005829] cytosol; [GO:003…	GO:0031234 extrinsic component of cytoplasmic side of plasma membrane;GO:0009898 cytoplasmic side of plasma membrane;GO:0019897 extrinsic component of plasma membrane	GO:0004715 non-membrane spanning protein tyrosine kinase activity;GO:0034987 immunoglobulin receptor binding;GO:0004713 protein tyrosine kinase activity	Tyr protein kinase family	Predicted intracellular proteins; Disease related genes; Cancer-related genes:Candidate cancer biomarkers; Cancer-related genes:Mutational cancer driver genes; Enzymes; Potential drug targets; Kinases:Tyr protein kinases; ENZYME proteins:Transferases	[IPR027267] AH/BAR domain superfamily; [IPR000719] Protein kinase domain; [IPR000980] SH2 domain; [IPR001060] FCH domain; [IPR001245] Serine-threonine/tyrosine-protein kinase, catalytic domain; [IPR008266] Tyrosine-protein kinase, active site; [IPR011009] Protein kinase-like domain superfamily; [IPR016250] Tyrosine-protein kinase, Fes/Fps type; [IPR017441] Protein kinase, ATP binding site; [IPR02…	Cytosol;Nucleoplasm (reliability']); Additional: Vesicles								MP:0005370 liver/biliary system phenotype; MP:0005385 cardiovascular system phenotype; MP:0010768 mortality/aging; MP:0005369 muscle phenotype; MP:0005376 homeostasis/metabolism phenotype; MP:0005378 growth/size/body region phenotype; MP:0005381 digestive/alimentary phenotype; MP:0005387 immune system phenotype; MP:0005389 reproductive system phenotype; MP:0003631 nervous system phenotype; MP:000…		OMIM ID:190030 V-fes feline sarcoma viral/v-fps fujinami avian sarcoma viral oncogene homolog			Arterial Pressure;Blood Pressure;Hypertension;Myocardial Infarction;Schizophrenia				Fostamatinib	Facial Pain; Pain in children; Codependency; Diastolic blood pressure measurement; Accessory spleen; Diminished ovarian reserve; Acute onset pain; Systolic blood pressure measurement; Dizziness; Enteritis; Postoperative cognitive dysfunction; Blood Pressure; Paroxysmal nocturnal hemoglobinuria; Fibromyalgia; Infectious Otitis Media; Mean blood pressure; Malignant Fibrous Histiocytoma; Bloom Syndr…	28	90	[{"UniProt":"P07332","EnsemblGene":["ENSG00000182511"],"SwissProt":["FES_HUMAN"]},{"UniProt":"A0A024RC92","RefSeq":[["NM_002005","NP_001996","REVIEWED"],["XM_017022005","XP_016877494","MODEL"],["XM_017022009","XP_016877498","MODEL"]],"SwissProt":["A0A024RC92_HUMAN"]}]		Distribution: Detected in all; Specificity: Tissue enhanced	General cytoplasmic and occasional nuclear expression.; antibody: Most normal cells showed moderate to strong cytoplasmic positivity with additional nuclear positivity.	Antibody: Most tumor cells showed moderate to strong cytoplasmic positivity with additional nuclear positivity.	(M92)PID ANGIOPOIETIN RECEPTOR PATHWAY; (M28)PID IL4 2PATHWAY; (M237)PID VEGFR1 2 PATHWAY	(ko04360)Axon guidance; (hsa04360)Axon guidance			(M5938)HALLMARK REACTIVE OXYGEN SPECIES PATHWAY
Oncogene	EZH2	2146	ENX-1|ENX1|EZH2b|KMT6|KMT6A|WVS|WVS2	enhancer of zeste 2 polycomb repressive complex 2 subunit	This gene encodes a member of the Polycomb-group (PcG) family. PcG family members form multimeric protein complexes, which are involved in maintaining the transcriptional repressive state of genes over successive cell generations. This protein associates with the embryonic ectoderm development protein, the VAV1 oncoprotein, and the X-linked nuclear protein. This protein may play a role in the hem…	chr7:148884344-148807374	GO:0036333 hepatocyte homeostasis;GO:1904772 response to tetrachloromethane;GO:0035983 response to trichostatin A	[GO:0003674] molecular_function; [GO:0008168] methyltransferase activity; [GO:0008150] biological_process; [GO:0051276] chromosome organization; [GO:0006464] cellular protein modification process; [GO:0008283] cell population proliferation; [GO:0005575] cellular_component; [GO:0005622] intracellular; [GO:0043226] organelle; [GO:0005634] nucleus; [GO:0003677] DNA binding; [GO:0005694] chromosome; …	GO:0045120 pronucleus;GO:0035098 ESC/E(Z) complex;GO:0031519 PcG protein complex	GO:0046976 histone methyltransferase activity (H3-K27 specific);GO:0070878 primary miRNA binding;GO:0000979 RNA polymerase II core promoter sequence-specific DNA binding		Predicted intracellular proteins; Disease related genes; Cancer-related genes:Candidate cancer biomarkers; Cancer-related genes:Mutational cancer driver genes; Enzymes; Potential drug targets; ENZYME proteins:Transferases; Cancer-related genes:Mutated cancer genes	[IPR001005] SANT/Myb domain; [IPR001214] SET domain; [IPR021654] Histone-lysine N-methyltransferase EZH1/EZH2; [IPR026489] CXC domain; [IPR033467] Tesmin/TSO1-like CXC domain; [IPR041343] Polycomb repressive complex 2 subunit EZH1/EZH2, tri-helical domain; [IPR041355] Pre-SET CXC domain	Nucleoplasm (reliability'])					yes			MP:0005367 renal/urinary system phenotype; MP:0005385 cardiovascular system phenotype; MP:0010768 mortality/aging; MP:0005369 muscle phenotype; MP:0005376 homeostasis/metabolism phenotype; MP:0005384 cellular phenotype; MP:0005378 growth/size/body region phenotype; MP:0005387 immune system phenotype; MP:0002006 neoplasm; MP:0003631 nervous system phenotype; MP:0005390 skeleton phenotype; MP:00053…	[ORPHA:3447] Weaver syndrome	OMIM ID:601573 Enhancer of zeste 2 polycomb repressive complex 2 subunit	Weaver syndrome; Inborn genetic diseases; Malignant melanoma of skin; Non-Hodgkin lymphoma; Lymphoma; EZH2-related disorder	Platelet Function Tests		[614421] WEAVER SYNDROME 2	Clinvar: phenotype not specified: likely pathogenic; Inborn genetic diseases: likely pathogenic; Lymphoma: likely pathogenic; Malignant melanoma of skin: likely pathogenic; Non-hodgkin lymphoma: likely pathogenic; Weaver syndrome: likely pathogenic,pathogenic	HP:0200000:Dysharmonic bone age; HP:0003911:Flared humeral metaphysis; HP:0002834:Flared femoral metaphysis; HP:0001814:Deep-set nails; HP:0004689:Short fourth metatarsal; HP:0001848:Calcaneovalgus deformity; HP:0001212:Prominent fingertip pads; HP:0003066:Limited knee extension; HP:0001816:Thin nail; HP:0000034:Hydrocele testis; HP:0010300:Abnormally low-pitched voice; HP:0010751:Dimple chin; HP…	Tazemetostat; CPI-1205	Dysharmonic bone age; Upper Extremity Deformities, Congenital; COHEN-GIBSON SYNDROME; Flared humeral metaphysis; Fetal rhabdomyoma; Flared femoral metaphysis; Histiocytic and Dendritic Cell Neoplasm; Primary acquired melanosis; Weaver-Like Syndrome; Intraocular Medulloepithelioma; ovarian serous tumor; Cellular leiomyoma; Cementoma; Deep-set nails; Endometrial cystic hyperplasia; Diffuse large B-…	972	1105	[{"UniProt":"Q15910","EnsemblGene":["ENSG00000106462"],"SwissProt":["EZH2_HUMAN"]},{"UniProt":"S4S3R8","RefSeq":[["NM_152998","NP_694543","REVIEWED"]],"UCSC":["uc003wfc.3"],"SwissProt":["S4S3R8_HUMAN"]},{"UniProt":"A0A090N8E9","RefSeq":[["NM_004456","NP_004447","REVIEWED"],["XM_011515884","XP_011514186","MODEL"]],"SwissProt":["A0A090N8E9_HUMAN"]}]		Distribution: Detected in many; Specificity: Tissue enhanced	antibody: Strong nuclear staining was observed in cells in seminiferous ducts, hematopoietic cells, lymphoid cells, glandular cells of the gastrointestinal tract, squamous epithelial cells and trophoblastic cells. Most remaining normal tissues displayed weak nuclear staining or were negative.; Nuclear expression in several tissues, most abundant in testis and lymphoid tissues.	Antibody: Cancers showed moderate to strong nuclear staining. Renal cancers were weakly stained or negative in a few cases.		(ko00310)Lysine degradation; (hsa00310)Lysine degradation; (ko05206)MicroRNAs in cancer			(M5951)HALLMARK SPERMATOGENESIS; (M5901)HALLMARK G2M CHECKPOINT; (M5925)HALLMARK E2F TARGETS	(M22025)BIOCARTA PRC2 PATHWAY
Oncogene	EWSR1	2130	EWS|EWS-FLI1|bK984G1.4	EWS RNA binding protein 1	This gene encodes a multifunctional protein that is involved in various cellular processes, including gene expression, cell signaling, and RNA processing and transport. The protein includes an N-terminal transcriptional activation domain and a C-terminal RNA-binding domain. Chromosomal translocations between this gene and various genes encoding transcription factors result in the production of ch…	chr22:29268254-29300523	GO:0006355 regulation of transcription, DNA-templated;GO:1903506 regulation of nucleic acid-templated transcription;GO:2001141 regulation of RNA biosynthetic process	[GO:0008150] biological_process; [GO:0034641] cellular nitrogen compound metabolic process; [GO:0009058] biosynthetic process; [GO:0003674] molecular_function; [GO:0003723] RNA binding; [GO:0005575] cellular_component; [GO:0005622] intracellular; [GO:0043226] organelle; [GO:0005634] nucleus; [GO:0005737] cytoplasm; [GO:0043167] ion binding; [GO:0005654] nucleoplasm; [GO:0005730] nucleolus; [GO:00…	GO:0005730 nucleolus;GO:0005654 nucleoplasm;GO:0031981 nuclear lumen	GO:0005516 calmodulin binding;GO:0003712 transcription coregulator activity;GO:0042802 identical protein binding		Disease related genes; Cancer-related genes:Mutational cancer driver genes; Predicted intracellular proteins	[IPR034870] TAF15/EWS/TLS family; [IPR000504] RNA recognition motif domain; [IPR001876] Zinc finger, RanBP2-type; [IPR012677] Nucleotide-binding alpha-beta plait domain superfamily; [IPR033109] RNA-binding protein EWS; [IPR034869] EWS, RNA recognition motif; [IPR035979] RNA-binding domain superfamily; [IPR036443] Zinc finger, RanBP2-type superfamily	Nucleoplasm (reliability']); Additional: Nucleoli					yes			MP:0010768 mortality/aging; MP:0005376 homeostasis/metabolism phenotype; MP:0005378 growth/size/body region phenotype; MP:0005386 behavior/neurological phenotype; MP:0005387 immune system phenotype; MP:0002006 neoplasm; MP:0005371 limbs/digits/tail phenotype; MP:0005390 skeleton phenotype; MP:0005397 hematopoietic system phenotype; MP:0005379 endocrine/exocrine gland phenotype	[ORPHA:83469] Desmoplastic small round cell tumor; [ORPHA:319] Ewing sarcoma; [ORPHA:370334] Extraskeletal Ewing sarcoma; [ORPHA:209916] Extraskeletal myxoid chondrosarcoma; [ORPHA:97338] Melanoma of soft tissue	OMIM ID:133450 Ewing sarcoma breakpoint region 1						HP:0100006:Neoplasm of the central nervous system; HP:0012254:Ewing sarcoma; HP:0010788:Testicular neoplasm; HP:0002595:Ileus; HP:0002585:Abnormality of the peritoneum; HP:0100242:Sarcoma; HP:0100721:Mediastinal lymphadenopathy; HP:0100526:Neoplasm of the lung; HP:0100615:Ovarian neoplasm; HP:0002894:Neoplasm of the pancreas; HP:0004326:Cachexia; HP:0001541:Ascites; HP:0003270:Abdominal distentio…		Benign vascular neoplasm; Refractory Ewing Sarcoma; Neuroepithelial, Perineurial, and Schwann Cell Neoplasm; Non-Cutaneous Melanoma; Thymic Clear Cell Carcinoma; Haemangioma of bone; Sarcomatosis; Clear cell odontogenic carcinoma; Extrarenal rhabdoid tumor; Glioneuronal tumor; low-grade salivary gland carcinoma; Mandibular Neoplasms; Undifferentiated/Unclassified Sarcoma; Askin's tumor; Juvenile …	200	345	[{"UniProt":"Q01844","EnsemblGene":["ENSG00000182944"],"SwissProt":["EWS_HUMAN"]}]		Distribution: Detected in all; Specificity: Low tissue specificity	Ubiquitous nuclear expression.; antibody: Strong nuclear positivity was observed in all normal tissues except for purkinje cells in cerebellum. Additional cytoplasmic staining was observed in a few cases.	Antibody: Most malignant cells showed strong nuclear immunoreactivity. Several cases displayed additional cytoplasmic positivity.	(M258)PID BARD1 PATHWAY	(ko05202)Transcriptional misregulation in cancer; (hsa05202)Transcriptional misregulation in cancer			(M5901)HALLMARK G2M CHECKPOINT
Oncogene	ETV6	2120	TEL|TEL/ABL|THC5	ETS variant transcription factor 6	This gene encodes an ETS family transcription factor. The product of this gene contains two functional domains: a N-terminal pointed (PNT) domain that is involved in protein-protein interactions with itself and other proteins, and a C-terminal DNA-binding domain. Gene knockout studies in mice suggest that it is required for hematopoiesis and maintenance of the developing vascular network. This ge…	chr12:11649601-11895386	GO:0007296 vitellogenesis;GO:0007028 cytoplasm organization;GO:0097152 mesenchymal cell apoptotic process	[GO:0008150] biological_process; [GO:0034641] cellular nitrogen compound metabolic process; [GO:0009058] biosynthetic process; [GO:0005575] cellular_component; [GO:0003674] molecular_function; [GO:0003700] DNA-binding transcription factor activity; [GO:0003677] DNA binding; [GO:0005622] intracellular; [GO:0043226] organelle; [GO:0005634] nucleus; [GO:0005730] nucleolus; [GO:0005737] cytoplasm; [G…	GO:0000790 nuclear chromatin;GO:0005730 nucleolus;GO:0000785 chromatin	GO:0001227 DNA-binding transcription repressor activity, RNA polymerase II-specific;GO:0001228 DNA-binding transcription activator activity, RNA polymerase II-specific;GO:0019904 protein domain specific binding		Transcription factors:Helix-turn-helix domains; Disease related genes; Cancer-related genes; Predicted intracellular proteins	[IPR000418] Ets domain; [IPR003118] Pointed domain; [IPR013761] Sterile alpha motif/pointed domain superfamily; [IPR036388] Winged helix-like DNA-binding domain superfamily; [IPR036390] Winged helix DNA-binding domain superfamily	Nucleoli (reliability']); Additional: Cytosol						principal1	yes	MP:0005385 cardiovascular system phenotype; MP:0010768 mortality/aging; MP:0005376 homeostasis/metabolism phenotype; MP:0005384 cellular phenotype; MP:0005378 growth/size/body region phenotype; MP:0005381 digestive/alimentary phenotype; MP:0005387 immune system phenotype; MP:0002006 neoplasm; MP:0005397 hematopoietic system phenotype; MP:0005379 endocrine/exocrine gland phenotype; MP:0010771 inte…	[ORPHA:98823] Chronic myelomonocytic leukemia; [ORPHA:2665] Congenital mesoblastic nephroma; [ORPHA:146] Differentiated thyroid carcinoma; [ORPHA:71290] Familial platelet disorder with associated myeloid malignancy; [ORPHA:2030] Fibrosarcoma; [ORPHA:99860] Precursor B-cell acute lymphoblastic leukemia; [ORPHA:314950] Primary hypereosinophilic syndrome	OMIM ID:600618 Ets variant gene 6	Thrombocytopenia; Thrombocytopenia 5; Acute lymphoid leukemia; Hematologic neoplasm; Acute myeloid leukemia	Alanine Transaminase;Antihypertensive Agents;Blood Flow Velocity;Carotid Stenosis;Child Development Disorders, Pervasive;Echocardiography;Hemoglobin A, Glycosylated;Job Satisfaction;Parkinson Disease;Platelet Function Tests;Stroke	Asthma;Body Height;Colorectal Neoplasms;Forced Expiratory Volume;Immunoglobulins		Acute lymphoid leukemia: pathogenic; Acute myeloid leukemia: pathogenic; Hematologic neoplasm: likely pathogenic,pathogenic; Inborn genetic diseases: pathogenic; See cases: pathogenic; Thrombocytopenia: pathogenic; Thrombocytopenia 5: likely pathogenic,pathogenic	HP:0004808:Acute myeloid leukemia; HP:0000967:Petechiae; HP:0000421:Epistaxis; HP:0001875:Neutropenia; HP:0000978:Bruising susceptibility; HP:0001428:Somatic mutation; HP:0001873:Thrombocytopenia; HP:0001903:Anemia; HP:0000006:Autosomal dominant inheritance		Infantile fibromatosis; Macrocytosis, Familial; THROMBOCYTOPENIA 5; Acute lymphoblastic leukemia, in relapse; Mammary Analog Secretory Carcinoma of Salivary Gland; Mesoblastic nephroma, cellular; Neoplasm of minor salivary gland; Rhabdomyosarcoma with ganglionic differentiation; Adult Acute Eosinophilic Leukemia; Childhood Acute Eosinophilic Leukemia; Spindle cell nevus of Reed; tumor miofibroblÃ…	203	272	[{"UniProt":"P41212","EnsemblGene":["ENSG00000139083"],"EnsemblTrans":[["ENST00000396373","ENSP00000379658","principal1"]],"RefSeq":[["NM_001987","NP_001978","REVIEWED"]],"UCSC":["uc001qzz.4"],"SwissProt":["ETV6_HUMAN"]},{"UniProt":"A0A0S2Z3C9","RefSeq":[["NM_001987","NP_001978","REVIEWED"]],"SwissProt":["A0A0S2Z3C9_HUMAN"]}]		Distribution: Detected in all; Specificity: Low tissue specificity	Nuclear expression in several tissues, most abundant in bone marrow and appendix.; antibody: Moderate to strong nuclear positivity was observed in bone marrow, appendix, gall bladder, squamous epithelium, and male genitalia. Remaining normal cells were negative.	Antibody: Moderate to strong nuclear positivity was displayed in several cases of breast, urothelial, prostate, ovarian, and cervical cancers. Most remaining cancer tissues were weakly stained or negative.		(ko04320)Dorso-ventral axis formation; (hsa04320)Dorso-ventral axis formation; (ko05202)Transcriptional misregulation in cancer
Oncogene	ETS2	2114	ETS2IT1	ETS proto-oncogene 2, transcription factor	This gene encodes a transcription factor which regulates genes involved in development and apoptosis. The encoded protein is also a protooncogene and shown to be involved in regulation of telomerase. A pseudogene of this gene is located on the X chromosome. Alternative splicing results in multiple transcript variants. [provided by RefSeq, Jan 2012]	chr21:38805183-38824955	GO:0001712 ectodermal cell fate commitment;GO:0001705 ectoderm formation;GO:0010668 ectodermal cell differentiation	[GO:0008150] biological_process; [GO:0034641] cellular nitrogen compound metabolic process; [GO:0009058] biosynthetic process; [GO:0005575] cellular_component; [GO:0003674] molecular_function; [GO:0003700] DNA-binding transcription factor activity; [GO:0003677] DNA binding; [GO:0005622] intracellular; [GO:0043226] organelle; [GO:0005634] nucleus; [GO:0005654] nucleoplasm; [GO:0005737] cytoplasm; …	GO:0000790 nuclear chromatin;GO:0000785 chromatin;GO:0044454 nuclear chromosome part	GO:0035259 glucocorticoid receptor binding;GO:0035258 steroid hormone receptor binding;GO:0035257 nuclear hormone receptor binding		Transcription factors:Helix-turn-helix domains; Predicted intracellular proteins; RAS pathway related proteins	[IPR000418] Ets domain; [IPR003118] Pointed domain; [IPR013761] Sterile alpha motif/pointed domain superfamily; [IPR016311] Transforming protein C-ets; [IPR027276] Transforming protein C-ets-2; [IPR036388] Winged helix-like DNA-binding domain superfamily; [IPR036390] Winged helix DNA-binding domain superfamily	Nucleoplasm (reliability']); Additional: Cytosol;Plasma membrane						principal1		MP:0005385 cardiovascular system phenotype; MP:0010768 mortality/aging; MP:0005378 growth/size/body region phenotype; MP:0002006 neoplasm; MP:0005379 endocrine/exocrine gland phenotype; MP:0010771 integument phenotype; MP:0005380 embryo phenotype		OMIM ID:164740 V-ets avian erythroblastosis virus e26 oncogene homolog 2		Bone Density;Factor VII	Carcinoma, Non-Small-Cell Lung					Alzheimer disease type 1; TOE SYNDACTYLY, TELECANTHUS, AND ANOGENITAL AND RENAL MALFORMATIONS; Eye Neoplasms; Partial Trisomy; CML progression; Hypopharyngeal Cancer; DOWN SYNDROME CRITICAL REGION; Chronic inflammatory disorder; Erythroblastosis; Hypopharyngeal Carcinoma; Small Lymphocytic Lymphoma; Chordoma; Toxic Epidermal Necrolysis; Acute respiratory distress; Abnormality of the skeletal syst…	74	123	[{"UniProt":"P15036","EnsemblGene":["ENSG00000157557"],"EnsemblTrans":[["ENST00000360214","ENSP00000353344","principal1"],["ENST00000360938","ENSP00000354194","principal1"],["ENST00000653642","ENSP00000499315","principal1"],["ENST00000662305","ENSP00000499226","principal1"],["ENST00000666778","ENSP00000499775","principal1"]],"RefSeq":[["NM_005239","NP_005230","REVIEWED"],["XM_005260935","XP_00526…		Distribution: Detected in all; Specificity: Low tissue specificity			(M195)PID CMYB PATHWAY	(ko04320)Dorso-ventral axis formation; (hsa04320)Dorso-ventral axis formation; (hsa04014)Ras signaling pathway			(M5919)HALLMARK HEDGEHOG SIGNALING; (M5890)HALLMARK TNFA SIGNALING VIA NFKB; (M5934)HALLMARK XENOBIOTIC METABOLISM	(M14449)BIOCARTA ETS PATHWAY; (M19118)BIOCARTA KERATINOCYTE PATHWAY
[truncated: 4,123 more rows]
