# Supplementary material for: Oncometabolite D-2-hydroxyglutarate - dependent metabolic reprogramming induces skeletal muscle atrophy during cancer cachexia
Source: Research Square preprint supplement (doi:10.21203/rs.3.rs-1246702/v1), 2022-01-27
Supplement: Supplementary file 5 [file 194ef8ebb90fe70b3163ccd9.xls]

## Sheet: D2HG vs Control （1st）
GeneID	Length	D2_HG-Expression	NTC-Expression	log2FoldChange(NTC/D2_HG)	Pvalue	Padj	Up/Down-Regulation(NTC/D2_HG)	SYMBOL
ENSMUSG00000001036	4458	3443.58	1975.41	-0.80167	0.0001041	0.00565384	Down	Epn2
ENSMUSG00000002329	1733	921.238	601.882	-0.613867	1.58e-05	0.00140967	Down	Mdp1
ENSMUSG00000003955	718	1171.8	673.322	-0.799635	0.000156272	0.00779329	Down	Fam162a
ENSMUSG00000005667	2085	1997.37	1113.81	-0.842586	9.13e-09	2.99e-06	Down	Mthfd2
ENSMUSG00000006494	5185	3367.21	2144.4	-0.650908	3e-05	0.00220274	Down	Pdk1
ENSMUSG00000007682	5815	1187.43	731.104	-0.699553	0.000127606	0.00658398	Down	Dio2
ENSMUSG00000013076	8957	13650.4	8900.07	-0.617041	0.00193593	0.045734	Down	Amotl1
ENSMUSG00000017491	3108	431.829	250.483	-0.785345	0.000948577	0.0293207	Down	Rarb
ENSMUSG00000018846	7376	12737.5	7338.7	-0.795459	6.07e-07	0.000105692	Down	Pank3
ENSMUSG00000019102	1729	1636.69	204.162	-3.00291	1.37e-11	8.74e-09	Down	Aldh3a1
ENSMUSG00000019775	8191	996.689	584.396	-0.769785	0.000193843	0.0091335	Down	Rgs17
ENSMUSG00000020063	4430	1402.2	824.113	-0.766747	1.91e-05	0.00160778	Down	Sirt1
ENSMUSG00000020256	6027	2943.92	1157.54	-1.34655	4.53e-07	8.22e-05	Down	Aldh1l2
ENSMUSG00000020467	2037	425.093	186.134	-1.19118	2.65e-07	5.62e-05	Down	Efemp1
ENSMUSG00000020572	4527	3255.86	2009.33	-0.696197	1.08e-05	0.00104099	Down	Nampt
ENSMUSG00000020620	7423	869.634	545.621	-0.672243	0.00051272	0.0186005	Down	Abca8b
ENSMUSG00000020964	6300	6193.25	4050.21	-0.612783	0.000385511	0.0149902	Down	Sel1l
ENSMUSG00000021070	3792	1363.93	540.813	-1.33447	0.00044712	0.0168015	Down	Bdkrb2
ENSMUSG00000021266	2878	1581.21	1028.65	-0.620076	0.00134426	0.0358512	Down	Wars
ENSMUSG00000021306	3634	1779.58	685.068	-1.37711	0.00128697	0.0346713	Down	Gpr137b
ENSMUSG00000021670	4425	7787.08	4207.21	-0.888203	6.83e-06	0.000744233	Down	Hmgcr
ENSMUSG00000021831	4418	3501.02	2111.11	-0.729658	3.97e-05	0.00268727	Down	Ero1l
ENSMUSG00000021996	1988	7636.09	4231.77	-0.851536	2.54e-05	0.00200844	Down	Esd
ENSMUSG00000022032	3794	231.095	65.0475	-1.82807	4.38e-05	0.00286792	Down	Scara5
ENSMUSG00000022351	4467	15384.8	8455	-0.863617	0.000889843	0.0279561	Down	Sqle
ENSMUSG00000022425	3095	552.63	115.77	-2.25495	6.73e-13	5.04e-10	Down	Enpp2
ENSMUSG00000022707	3734	831.011	509.509	-0.705599	0.00078279	0.0252431	Down	Gbe1
ENSMUSG00000022797	4890	4834.14	2279.16	-1.08473	4.99e-11	2.91e-08	Down	Tfrc
ENSMUSG00000023832	2250	8762.26	4175.94	-1.06919	0.00101296	0.0299975	Down	Acat2
ENSMUSG00000024006	3354	2505.24	1656.28	-0.596819	0.00176638	0.0430055	Down	Stk38
ENSMUSG00000024378	5097	4452.09	2455.2	-0.858605	0.000124318	0.0064892	Down	Stard4
ENSMUSG00000024799	3083	1490.18	568.997	-1.38902	0.00119171	0.0331677	Down	Tm7sf2
ENSMUSG00000024924	7971	2146.32	1346.99	-0.672081	0.00135114	0.0358921	Down	Vldlr
ENSMUSG00000025026	4426	1224.08	703.964	-0.798262	2.85e-05	0.00216991	Down	Add3
ENSMUSG00000025083	3667	2358.75	1450.81	-0.701084	0.000326104	0.0131372	Down	Afap1l2
ENSMUSG00000025408	969	984.02	591.439	-0.734116	0.00113301	0.0320662	Down	Ddit3
ENSMUSG00000025432	3033	130.251	15.2684	-3.09169	0.000265613	0.0115314	Down	Avil
ENSMUSG00000025591	4328	562.346	347.906	-0.692317	0.00018818	0.00898376	Down	Tma16
ENSMUSG00000025887	2649	10604.6	6816.53	-0.63759	6.03e-06	0.000685422	Down	Casp12
ENSMUSG00000025949	11237	3193.08	2126.69	-0.586279	4.06e-05	0.00272605	Down	Pikfyve
ENSMUSG00000025950	2302	9238.33	6069.46	-0.606061	6.84e-06	0.000744233	Down	Idh1
ENSMUSG00000026023	2108	77.4375	19.6187	-1.97922	6.64e-05	0.00384055	Down	Cdk15
ENSMUSG00000026156	5655	482.208	251.436	-0.939167	5.25e-05	0.00324864	Down	B3gat2
ENSMUSG00000026393	5258	8038.92	2241.79	-1.84237	5.76e-25	3.86e-21	Down	Nek7
ENSMUSG00000026628	1984	246.187	110.313	-1.15737	0.000194039	0.0091335	Down	Atf3
ENSMUSG00000026674	8590	7284.77	2783.32	-1.38805	1.75e-05	0.00151277	Down	Ddr2
ENSMUSG00000026675	4612	3993.96	1978.19	-1.0136	0.000374473	0.0146459	Down	Hsd17b7
ENSMUSG00000027122	3337	3113.81	2029.82	-0.617349	6.13e-05	0.00362415	Down	Arl14ep
ENSMUSG00000027339	8233	950.549	351.169	-1.43648	0.000118787	0.00627373	Down	Rassf2
ENSMUSG00000027424	2840	450.79	289.413	-0.639154	0.00115371	0.0323786	Down	Mgme1
ENSMUSG00000027677	9661	3112.03	2056.8	-0.597397	2.66e-06	0.000363816	Down	Ttc14
ENSMUSG00000028179	1815	153.05	54.5519	-1.48799	0.00125196	0.0342642	Down	Cth
ENSMUSG00000028518	7969	317.983	181.305	-0.810138	0.0013198	0.0352693	Down	Prkaa2
ENSMUSG00000028716	1129	49.4702	1.65284	-4.90064	0.00101982	0.0300867	Down	Pdzk1ip1
ENSMUSG00000028780	5491	1864.85	1133.84	-0.718002	5.63e-06	0.000651268	Down	Sema3c
ENSMUSG00000029108	8785	2810.84	1639.66	-0.777589	0.0015555	0.0394462	Down	Pcdh7
ENSMUSG00000029571	6002	16251.6	10634.6	-0.611793	2.41e-05	0.0019347	Down	Tmem106b
ENSMUSG00000029659	2953	10675.3	5902.69	-0.854802	3.95e-06	0.000486136	Down	Medag
ENSMUSG00000029752	2016	2179.09	1373.86	-0.665472	6.07e-05	0.00360526	Down	Asns
ENSMUSG00000030057	2178	5429.96	3298.35	-0.719263	1.85e-07	4.25e-05	Down	Cnbp
ENSMUSG00000030074	7658	4419.02	2273.82	-0.958571	5.85e-05	0.00355266	Down	Gxylt2
ENSMUSG00000031278	5280	13916.7	9037.91	-0.622735	4.35e-05	0.00286792	Down	Acsl4
ENSMUSG00000031337	4111	404.912	261.074	-0.633039	0.000889136	0.0279561	Down	Mtm1
ENSMUSG00000031349	2168	9176.26	5401.3	-0.764565	0.00169732	0.0417213	Down	Nsdhl
ENSMUSG00000031604	2969	10895	5816.36	-0.905456	0.000651575	0.0218522	Down	Msmo1
ENSMUSG00000031762	511	4685.95	92.5328	-5.66215	4.48e-10	1.88e-07	Down	Mt2
ENSMUSG00000031765	1085	7257.66	648.546	-3.48421	1.11e-07	2.71e-05	Down	Mt1
ENSMUSG00000032018	4787	6751.37	4058.24	-0.734285	0.000636089	0.0215483	Down	Sc5d
ENSMUSG00000032348	977	1473.69	614.622	-1.2615	0.000104578	0.00565689	Down	Gsta4
ENSMUSG00000032350	3423	1647.35	1025.17	-0.684077	4.57e-05	0.00296095	Down	Gclc
ENSMUSG00000032624	5441	1854.09	1207.96	-0.618343	0.000492731	0.0182093	Down	Eml4
ENSMUSG00000032715	2026	581.859	99.6292	-2.54577	2.8e-06	0.000375946	Down	Trib3
ENSMUSG00000032802	2812	1653.42	922.63	-0.841578	0.00188101	0.0449799	Down	Srxn1
ENSMUSG00000032826	14305	1118.36	709.473	-0.656155	0.000567352	0.0201658	Down	Ank2
ENSMUSG00000032849	5715	506.603	255.569	-0.986391	0.000273767	0.0118089	Down	Abcc4
ENSMUSG00000033083	6483	318.151	175.615	-0.857052	0.00112725	0.0320662	Down	Tbc1d4
ENSMUSG00000033174	3991	696.971	360.718	-0.950542	0.00144917	0.0378221	Down	Mgll
ENSMUSG00000033538	1901	2699.64	1666.98	-0.695414	5.12e-05	0.00318141	Down	Casp4
ENSMUSG00000033577	7927	1267.26	752.063	-0.752534	3.55e-05	0.00246571	Down	Myo6
ENSMUSG00000034218	9819	1564.41	1039.36	-0.590095	0.00123851	0.0339768	Down	Atm
ENSMUSG00000034459	2656	120.989	29.5943	-2.0298	0.000102996	0.00562861	Down	Ifit1
ENSMUSG00000034610	6054	1492.09	915.283	-0.705146	0.000292834	0.0123743	Down	Tut4
ENSMUSG00000035266	3689	379.263	245.168	-0.629325	0.000546592	0.0196057	Down	Helq
ENSMUSG00000035458	912	33.2924	5.3364	-2.64151	0.000437778	0.0165898	Down	Tnni3
ENSMUSG00000036167	3573	2408.28	1282.19	-0.909343	1.49e-05	0.00134686	Down	Pphln1
ENSMUSG00000036941	4971	617.862	292.075	-1.08082	3.61e-07	7.13e-05	Down	Elac1
ENSMUSG00000037007	6470	1008.67	659.401	-0.613182	0.000125295	0.00651064	Down	Zfp113
ENSMUSG00000037434	5244	464.26	92.7348	-2.32318	1.03e-23	4.58e-20	Down	Slc30a1
ENSMUSG00000037820	3596	7692.35	4269.82	-0.849234	0.000928951	0.0289811	Down	Tgm2
ENSMUSG00000038451	1322	712.003	325.494	-1.12914	0.000984787	0.0295546	Down	Spsb2
ENSMUSG00000038876	4402	2185.53	1419.35	-0.622632	0.000257783	0.0113105	Down	Rnf146
ENSMUSG00000041180	4731	1041.8	589.436	-0.821682	0.000214857	0.00980379	Down	Hectd2
ENSMUSG00000041220	5951	5784.3	3200.6	-0.853752	6.51e-08	1.65e-05	Down	Elovl6
ENSMUSG00000042444	8081	5271.94	3266.59	-0.690483	0.000113343	0.00603371	Down	Mindy2
ENSMUSG00000043313	7138	591.559	387.642	-0.609848	0.00075622	0.0245634	Down	Pcdhb19
ENSMUSG00000043613	1801	7241.33	1550.04	-2.22393	1.87e-10	8.95e-08	Down	Mmp3
ENSMUSG00000044086	2215	3961.06	2429.87	-0.704987	2.91e-09	1.03e-06	Down	Lmod3
ENSMUSG00000044338	3699	9.66993	0	-5.71827	0.00120838	0.0333548	Down	Aplnr
ENSMUSG00000045294	2697	9021.31	3600.82	-1.325	0.000103216	0.00562861	Down	Insig1
ENSMUSG00000045639	6120	1034.38	677.157	-0.610893	6.21e-05	0.00365585	Down	Zfp629
ENSMUSG00000048078	13172	360.957	101.387	-1.83142	5.25e-06	0.000617407	Down	Tenm4
ENSMUSG00000048100	2443	1150.88	583.066	-0.981269	2.47e-05	0.0019762	Down	Taf13
ENSMUSG00000048249	7462	3101.05	1986.7	-0.642283	0.000243388	0.0108835	Down	Crebrf
ENSMUSG00000048424	3393	984.247	480.023	-1.0358	0.000443827	0.0167245	Down	Ranbp3l
ENSMUSG00000049723	4474	309.615	40.5739	-2.93154	6.84e-05	0.00392133	Down	Mmp12
ENSMUSG00000050315	9203	2950.29	916.801	-1.68619	5.36e-06	0.000625577	Down	Synpo2
ENSMUSG00000051098	3957	759.793	439.813	-0.788394	0.000663467	0.0220854	Down	Mblac2
ENSMUSG00000053012	1749	3324.66	885.078	-1.90942	5.79e-27	7.76e-23	Down	Krcc1
ENSMUSG00000053398	1893	2617.35	1442.25	-0.859762	4.02e-06	0.000489821	Down	Phgdh
ENSMUSG00000053916	1394	176.027	0.672362	-8.04673	9e-14	1.01e-10	Down	Nanp
ENSMUSG00000054545	3342	401.701	131.671	-1.60877	2.02e-09	7.51e-07	Down	Ugt1a6a
ENSMUSG00000055067	6871	661.346	432.511	-0.612807	0.000369194	0.0144817	Down	Smyd3
ENSMUSG00000055301	3432	1129.57	301.969	-1.90311	1.17e-10	6.03e-08	Down	Adh7
ENSMUSG00000055612	2424	259.865	139.464	-0.898173	0.00106975	0.0311294	Down	Cdca7
ENSMUSG00000055737	4175	11588.4	5862.13	-0.983153	3.51e-07	7.02e-05	Down	Ghr
ENSMUSG00000056133	2649	866.203	425.371	-1.02586	0.00184297	0.0446272	Down	Unc93a2
ENSMUSG00000057933	870	38.4228	2.66058	-3.85087	0.00157471	0.0398579	Down	Gsta2
ENSMUSG00000058135	1289	1564.38	643.175	-1.28224	4.86e-05	0.00309171	Down	Gstm1
ENSMUSG00000058258	3027	14446.2	7019.46	-1.04123	2.72e-07	5.62e-05	Down	Idi1
ENSMUSG00000058624	5428	1421.19	753.391	-0.915449	0.00147095	0.038168	Down	Gda
ENSMUSG00000058794	1878	41.6082	2.33483	-4.15621	0.000996963	0.0297823	Down	Nfe2
ENSMUSG00000059743	2953	11637.7	6273.96	-0.891348	0.000294253	0.0123743	Down	Fdps
ENSMUSG00000060548	4051	151.526	44.7714	-1.75833	5.64e-05	0.0034686	Down	Tnfrsf19
ENSMUSG00000062070	1825	20438.5	12455.8	-0.714494	2.13e-07	4.69e-05	Down	Pgk1
ENSMUSG00000062480	2144	1043	439.35	-1.24724	0.000185115	0.00889266	Down	Acat3
ENSMUSG00000062901	8172	6714.84	4449.65	-0.593621	0.000620197	0.0212018	Down	Klhl24
ENSMUSG00000063281	3040	1074.53	704.961	-0.60815	0.000471605	0.0175738	Down	Zfp35
ENSMUSG00000063873	4048	727.677	323.746	-1.16816	0.000191548	0.00911212	Down	Slc24a3
ENSMUSG00000063894	8805	1728.78	1045.63	-0.725348	3.18e-06	0.000405936	Down	Zkscan8
ENSMUSG00000066026	2337	1555.54	661.821	-1.23285	0.000969404	0.0294888	Down	Dhrs3
ENSMUSG00000066551	2838	2032.41	519.828	-1.96697	7.35e-11	3.95e-08	Down	Gm21596
ENSMUSG00000068854	2620	118.926	58.1785	-1.03095	0.00161132	0.0403901	Down	Hist2h2be
ENSMUSG00000070871	3281	2286.89	1424.94	-0.682332	1.71e-05	0.00149282	Down	Ccnyl1
ENSMUSG00000071847	10879	447.99	273.963	-0.709121	0.000417899	0.0160175	Down	Apcdd1
ENSMUSG00000072647	4783	346.676	95.517	-1.85933	0.00134692	0.0358512	Down	Adam1a
ENSMUSG00000072872	4503	2582.65	1694.84	-0.607605	3.12e-05	0.00225592	Down	Rybp
ENSMUSG00000073096	2913	317.046	42.6308	-2.89511	2.79e-19	9.36e-16	Down	Lrrc61
ENSMUSG00000074207	1492	94.3751	18.5843	-2.34241	0.000158544	0.00786144	Down	Adh1
ENSMUSG00000074264	1985	64.4077	26.596	-1.27429	0.00175969	0.0429204	Down	Amy1
ENSMUSG00000074785	7302	39.7983	4.34149	-3.1977	0.00209643	0.048489	Down	Plxnc1
ENSMUSG00000074794	4132	1294.28	632.067	-1.03431	4.53e-07	8.22e-05	Down	Arrdc3
ENSMUSG00000074909	4575	1475.32	932.101	-0.662627	1.79e-06	0.000253004	Down	Ranbp6
ENSMUSG00000078566	1756	3340.63	1967.32	-0.763797	0.000202209	0.00941885	Down	Bnip3
ENSMUSG00000078901	3382	304.422	0	-10.6964	6.68e-18	1.79e-14	Down	Gm14440
ENSMUSG00000089774	10913	6760.17	2194.3	-1.62329	9.32e-05	0.00518901	Down	Slc5a3
ENSMUSG00000093930	3464	27723.3	13717.9	-1.01502	6.76e-07	0.000114828	Down	Hmgcs1
ENSMUSG00000111709	874	17.1957	0	-6.5493	0.00209163	0.0484615	Down	Gm3776
ENSMUSG00000118504	2360	1124.91	733.019	-0.618254	0.000967451	0.0294888	Down	NA
ENSMUSG00000000275	5590	481.964	875.768	0.861653	0.00184769	0.0446387	Up	Trim25
ENSMUSG00000000296	1308	99.9314	176.112	0.818946	0.00155099	0.0394462	Up	Tpd52l1
ENSMUSG00000000359	1663	321.837	521.748	0.696261	0.000633194	0.0215046	Up	Rem1
ENSMUSG00000000753	1832	13950.5	21437.2	0.61979	6.88e-06	0.000744233	Up	Serpinf1
ENSMUSG00000000792	2928	47.1461	129.929	1.46042	1.12e-05	0.00106258	Up	Slc5a5
ENSMUSG00000000915	6735	1126.9	1765.62	0.648056	4.24e-07	8e-05	Up	Hip1r
ENSMUSG00000001053	2367	91.1194	195.1	1.10074	0.000227737	0.0102865	Up	N4bp3
ENSMUSG00000001131	883	3407.9	7003.8	1.03916	3.34e-05	0.00234861	Up	Timp1
ENSMUSG00000001270	2839	1553.95	2479.03	0.673705	1.4e-05	0.00128355	Up	Ckb
ENSMUSG00000001334	2763	86.8788	202.542	1.21977	0.000719973	0.0237308	Up	Fndc5
ENSMUSG00000001435	5595	1246.34	2171.21	0.800602	2.18e-06	0.000305122	Up	Col18a1
ENSMUSG00000001473	1758	6487.59	10844.7	0.741178	1.59e-06	0.000232393	Up	Tubb6
ENSMUSG00000001555	2584	4176.97	7027.48	0.750469	1.55e-06	0.000231643	Up	Fkbp10
ENSMUSG00000001663	1105	27.44	90.0109	1.71048	1.65e-05	0.00144291	Up	Gstt1
ENSMUSG00000001995	6690	617.859	1000.41	0.695547	3.09e-06	0.000402985	Up	Sipa1l2
ENSMUSG00000002020	6769	3207.26	5989.69	0.901025	4.21e-08	1.2e-05	Up	Ltbp2
ENSMUSG00000002249	3443	983.687	1523.87	0.631755	4.54e-05	0.00295911	Up	Tead3
ENSMUSG00000002803	2085	90.0802	286.411	1.66847	5.75e-06	0.000659179	Up	Btbd6
ENSMUSG00000002804	1241	136.88	257.528	0.912685	0.000497746	0.0183441	Up	Nudt14
ENSMUSG00000003355	2411	204.308	423.622	1.05161	7.52e-06	0.000800777	Up	Fkbp11
ENSMUSG00000003534	3874	2573.54	4014.88	0.641627	6.26e-05	0.00366619	Up	Ddr1
ENSMUSG00000004665	2460	5297.95	10644.6	1.00655	1.74e-07	4.1e-05	Up	Cnn2
ENSMUSG00000005611	6198	16.7326	61.194	1.86893	0.000137756	0.00699998	Up	Mrvi1
ENSMUSG00000005716	977	40.2541	310.768	2.94474	1.39e-12	9.8e-10	Up	Pvalb
ENSMUSG00000006219	3101	1091.93	1956.95	0.84145	8.46e-07	0.000135573	Up	Fblim1
ENSMUSG00000006235	1761	43.6054	111.641	1.35757	4.03e-05	0.0027181	Up	Epor
ENSMUSG00000006360	1809	1124.42	2467.08	1.1334	1.42e-08	4.42e-06	Up	Crip1
ENSMUSG00000006575	2046	274.626	422.57	0.621451	0.00143992	0.0376541	Up	Rundc3a
ENSMUSG00000007097	6227	1944.25	3125.32	0.684622	8.49e-07	0.000135573	Up	Atp1a2
ENSMUSG00000007122	1847	1135.57	2313.38	1.02641	7.64e-10	3.11e-07	Up	Casq1
ENSMUSG00000007888	1644	4745.46	8908.86	0.908682	6.77e-05	0.00390001	Up	Crlf1
ENSMUSG00000009566	2404	468.085	765.838	0.710599	0.00145432	0.0378829	Up	Fpgs
ENSMUSG00000009687	2998	149.183	395.242	1.40444	5.94e-05	0.00356082	Up	Fxyd5
ENSMUSG00000010067	2375	991.695	1556.39	0.649971	0.000293973	0.0123743	Up	Rassf1
ENSMUSG00000010154	2330	153.494	257.352	0.746246	0.000214045	0.00980006	Up	Spire2
ENSMUSG00000010406	856	567.198	1032.86	0.865007	0.00118636	0.0330873	Up	Mrpl52
ENSMUSG00000013367	2622	307.826	500.465	0.700684	0.00112776	0.0320662	Up	Iglon5
ENSMUSG00000015312	1284	862.378	1590.76	0.883008	2.74e-06	0.000371153	Up	Gadd45b
ENSMUSG00000015709	6228	190.688	347.453	0.865577	1.09e-05	0.0010467	Up	Arnt2
ENSMUSG00000018387	4548	205.861	365	0.826622	5.87e-05	0.00355266	Up	Shroom1
ENSMUSG00000018920	2699	78.0978	153.522	0.97534	0.000476838	0.0177196	Up	Cxcl16
ENSMUSG00000019997	2490	1396.44	2729.86	0.966883	0.000249921	0.0110304	Up	Ccn2
ENSMUSG00000020032	5558	2977.21	5273.23	0.824608	7.3e-07	0.00012098	Up	Nuak1
ENSMUSG00000020150	988	390.675	755.487	0.951406	4.38e-05	0.00286792	Up	Gamt
ENSMUSG00000020154	11911	26.3706	84.1155	1.67017	0.00102205	0.0300867	Up	Ptprb
ENSMUSG00000020325	1955	732.356	1527.06	1.05994	1.49e-09	5.89e-07	Up	Fstl3
ENSMUSG00000020388	1370	2062.89	3129.83	0.601389	0.00136068	0.036003	Up	Pdlim4
ENSMUSG00000020424	1574	81.5604	158.324	0.955294	0.0009612	0.0294888	Up	Castor1
ENSMUSG00000020435	4097	96.8482	204.479	1.07819	0.00020872	0.00962676	Up	Osbp2
ENSMUSG00000020601	4198	194.14	403.609	1.0547	3.2e-05	0.00228919	Up	Trib2
ENSMUSG00000020758	6208	38.178	110.965	1.53912	2.55e-05	0.00200844	Up	Itgb4
ENSMUSG00000021255	4300	4.00249	23.5628	2.56572	0.00166777	0.0414318	Up	Esrrb
ENSMUSG00000021367	2139	68.9768	135.196	0.971663	0.00119682	0.0332408	Up	Edn1
ENSMUSG00000021567	4016	825.797	1663.42	1.01001	1.95e-05	0.00163391	Up	Nkd2
ENSMUSG00000021591	4228	907.539	1546.74	0.768894	2.95e-05	0.00218988	Up	Glrx
ENSMUSG00000021950	1880	9551.64	14790	0.630804	0.000340278	0.0136263	Up	Anxa8
ENSMUSG00000022018	918	279.1	474.912	0.766971	0.000980169	0.0295546	Up	Rgcc
ENSMUSG00000022096	5607	784.415	1322.52	0.753359	1.9e-07	4.25e-05	Up	Hr
ENSMUSG00000022157	945	90.6062	170.9	0.913328	0.000529765	0.0191043	Up	Mcpt8
ENSMUSG00000022178	3397	2007.71	3066.07	0.61061	2.34e-05	0.00189951	Up	Ajuba
ENSMUSG00000022206	6892	58.718	133.156	1.18012	0.00153609	0.0393257	Up	Npr3
ENSMUSG00000022296	3963	383.195	700.501	0.86963	0.000270574	0.0117089	Up	Baalc
ENSMUSG00000022372	6572	61.181	131.066	1.09737	0.00197996	0.0463545	Up	Sla
ENSMUSG00000022440	2402	1237.9	2176.45	0.813991	3.94e-06	0.000486136	Up	C1qtnf6
ENSMUSG00000022769	1108	209.068	380.882	0.864643	3.21e-05	0.00228919	Up	Sdf2l1
ENSMUSG00000023004	1743	13707.1	21463.3	0.646919	0.000435683	0.0165572	Up	Tuba1b
ENSMUSG00000023885	5895	10892.8	16704	0.616783	0.00191886	0.0454798	Up	Thbs2
ENSMUSG00000024048	1937	9277.06	14301.2	0.624384	0.00130551	0.0349569	Up	Myl12a
ENSMUSG00000024063	3069	1673.7	2777.57	0.730662	0.000275599	0.0118127	Up	Lbh
ENSMUSG00000024420	6206	6.58105	45.7543	2.79729	2.73e-05	0.00210699	Up	Zfp521
ENSMUSG00000024787	1635	511.832	809.84	0.662406	0.00205543	0.0478707	Up	Snx15
ENSMUSG00000024854	913	976.117	1538.13	0.656311	0.00106812	0.0311294	Up	Pold4
ENSMUSG00000024883	4503	1656.95	2739.48	0.725226	3.77e-08	1.1e-05	Up	Rin1
ENSMUSG00000024909	2634	1489.62	2251.18	0.595595	0.00160948	0.0403901	Up	Efemp2
ENSMUSG00000025064	5588	18.4343	66.1937	1.84397	7.21e-05	0.00410006	Up	Col17a1
ENSMUSG00000025172	1138	485.055	2090.21	2.10704	2.26e-13	2.02e-10	Up	Ankrd2
ENSMUSG00000025279	4747	128.064	302.773	1.2405	2.18e-08	6.5e-06	Up	Dnase1l3
ENSMUSG00000025350	1329	529.403	863.976	0.70617	0.00106611	0.0311294	Up	Rdh5
ENSMUSG00000025986	5498	1260.67	5229.79	2.05237	2.98e-13	2.5e-10	Up	Slc39a10
ENSMUSG00000026167	2468	1271.1	2320.47	0.868366	2.24e-05	0.0018418	Up	Wnt10a
ENSMUSG00000026437	4355	1132.92	1975.92	0.802201	2.57e-10	1.15e-07	Up	Cdk18
ENSMUSG00000026475	2339	166.772	273.384	0.71373	0.000565029	0.0201592	Up	Rgs16
ENSMUSG00000026479	5164	241.691	677.644	1.4864	4.49e-07	8.22e-05	Up	Lamc2
ENSMUSG00000026494	13749	1725.89	2831.67	0.714195	0.00038478	0.0149902	Up	Kif26b
ENSMUSG00000026639	4867	756.074	1868.99	1.30541	0.000257997	0.0113105	Up	Lamb3
ENSMUSG00000026688	1097	464.04	768.419	0.728038	0.000506203	0.0185033	Up	Mgst3
ENSMUSG00000026837	8406	28691.5	47918.5	0.739949	0.00140045	0.0366934	Up	Col5a1
ENSMUSG00000027249	3167	97.8498	206.543	1.07674	1.19e-05	0.00111327	Up	F2
ENSMUSG00000027360	4518	182.108	390.926	1.10068	0.00047035	0.0175738	Up	Hdc
ENSMUSG00000027954	1632	457.384	732.431	0.679246	3.67e-06	0.000460048	Up	Efna1
ENSMUSG00000028063	3948	18301.7	27678.1	0.596746	0.0003345	0.0134351	Up	Lmna
ENSMUSG00000028108	1900	2515.59	4035.94	0.681991	4.15e-05	0.0027691	Up	Ecm1
ENSMUSG00000028369	11629	331.201	498.377	0.58918	0.00096325	0.0294888	Up	Svep1
ENSMUSG00000028843	743	955.94	1629.96	0.769986	0.000262448	0.0114682	Up	Sh3bgrl3
ENSMUSG00000028927	4774	359.179	831.305	1.21057	1.8e-13	1.73e-10	Up	Padi2
ENSMUSG00000028989	2157	146.342	495.697	1.75921	1.7e-12	1.14e-09	Up	Angptl7
ENSMUSG00000029019	781	4.55997	36.5801	2.99896	0.00130051	0.0348927	Up	Nppb
ENSMUSG00000029344	1835	2312.38	4007.81	0.793428	0.000164171	0.00806721	Up	Tpst2
ENSMUSG00000029580	1920	25211.7	40318.3	0.67733	0.000674652	0.0223468	Up	Actb
ENSMUSG00000029674	3473	569.907	897.742	0.655782	1.13e-05	0.00106324	Up	Limk1
ENSMUSG00000029718	2573	7757.33	12742.6	0.715998	3.4e-10	1.47e-07	Up	Pcolce
ENSMUSG00000029804	4731	873.267	1328.57	0.605255	6.74e-06	0.000744233	Up	Herc3
ENSMUSG00000029859	3273	164.656	458.963	1.47836	5.3e-07	9.35e-05	Up	Epha1
ENSMUSG00000029860	3188	10315	17450.2	0.758542	9.73e-07	0.00015351	Up	Zyx
ENSMUSG00000030399	2742	1407.58	2770.07	0.976739	1.74e-10	8.66e-08	Up	Ckm
ENSMUSG00000030587	1466	218.964	461.616	1.07592	1.2e-06	0.000180179	Up	2200002D01Rik
ENSMUSG00000030630	1585	887.889	1541.21	0.795428	6.86e-07	0.000114953	Up	Fah
ENSMUSG00000030748	5256	2577.11	4041.44	0.648974	1.63e-05	0.00143565	Up	Il4ra
ENSMUSG00000030782	3788	1114.37	2144.59	0.944299	9.63e-06	0.000956912	Up	Tgfb1i1
ENSMUSG00000031149	1339	1073.82	1814.42	0.756529	4.23e-07	8e-05	Up	Praf2
ENSMUSG00000031169	2622	1884.37	3565.52	0.919762	5.46e-08	1.47e-05	Up	Porcn
ENSMUSG00000031312	1314	407.734	780.154	0.93586	0.000776745	0.0251085	Up	Itgb1bp2
ENSMUSG00000031502	6615	4415.96	7036.27	0.672144	6.88e-06	0.000744233	Up	Col4a1
ENSMUSG00000031503	6450	3900.12	7257.54	0.895869	7.23e-15	9.7e-12	Up	Col4a2
ENSMUSG00000031570	2115	473.183	925.107	0.967277	0.000920661	0.0288567	Up	Plpp5
ENSMUSG00000031785	3616	334.349	576.176	0.784559	2.86e-06	0.000379775	Up	Adgrg1
ENSMUSG00000031788	3384	2914.36	4754.64	0.706222	5e-05	0.00314165	Up	Kifc3
ENSMUSG00000031880	1577	510.555	1014.62	0.99017	2.37e-06	0.000328336	Up	Rrad
ENSMUSG00000031957	878	209.636	387.125	0.884	0.00138434	0.036485	Up	Ctrb1
ENSMUSG00000031972	1446	36711.3	61673.9	0.748432	6.9e-11	3.86e-08	Up	Acta1
ENSMUSG00000032353	1579	1679.74	2840.9	0.758111	2.95e-06	0.000388271	Up	Tmed3
ENSMUSG00000032387	1987	387.417	760.099	0.972861	3.27e-09	1.13e-06	Up	Rbpms2
ENSMUSG00000032420	3995	1148.79	2179.28	0.92356	0.00195564	0.0459218	Up	Nt5e
ENSMUSG00000032532	799	107.602	234.397	1.1254	0.000296676	0.0124372	Up	Cck
ENSMUSG00000032796	9526	302.952	486.921	0.683923	0.000321155	0.0130555	Up	Lama1
ENSMUSG00000032911	8121	1529.77	2668.25	0.802669	9.93e-06	0.000971918	Up	Cspg4
ENSMUSG00000032997	3333	1981.59	3742.57	0.917617	0.000587533	0.0206329	Up	Chpf
ENSMUSG00000034201	3571	1233.04	2631.69	1.09366	3.73e-14	4.55e-11	Up	Gas2l1
ENSMUSG00000034555	3996	114.173	253.877	1.15272	0.00165964	0.0413063	Up	Tex16
ENSMUSG00000034595	3524	1654.25	2562.65	0.631623	0.000400877	0.0154091	Up	Ppp1r18
ENSMUSG00000034902	4323	998.271	2020.43	1.01727	3.62e-05	0.00250422	Up	Pip5k1c
ENSMUSG00000035370	4517	134.951	467.691	1.79474	0.000722683	0.0237617	Up	NA
ENSMUSG00000035735	5634	304.198	520.812	0.776486	5.05e-05	0.00315054	Up	Dagla
ENSMUSG00000035835	3063	293.477	573.503	0.966691	0.000956424	0.0294888	Up	Plppr3
ENSMUSG00000036306	5019	309.273	620.28	1.00406	1.88e-07	4.25e-05	Up	Lzts1
ENSMUSG00000036599	2331	697.721	1225.26	0.812365	7.24e-05	0.00410056	Up	Chst12
ENSMUSG00000036687	4326	114.421	241.922	1.08254	6.53e-05	0.00379861	Up	Tmem184a
ENSMUSG00000036752	1598	2556.12	4552.9	0.832736	0.00127782	0.0345603	Up	Tubb4b
ENSMUSG00000036782	3349	275.934	540.519	0.969338	0.000714385	0.0236046	Up	Klhl13
ENSMUSG00000036854	1980	246.085	537.836	1.12743	0.000309683	0.0127812	Up	Hspb6
ENSMUSG00000036855	2661	41.9568	112.373	1.41829	0.00125864	0.0343185	Up	Gjd4
ENSMUSG00000037010	3149	23.0804	87.6248	1.92075	0.000363536	0.0143016	Up	Apln
ENSMUSG00000037185	3919	1221.95	2527.13	1.04812	9.21e-06	0.000928587	Up	Krt80
ENSMUSG00000037217	3261	312.009	594.211	0.930085	4.94e-07	8.84e-05	Up	Syn1
ENSMUSG00000037280	3798	143.321	286.523	0.998864	3.66e-06	0.000460048	Up	Galnt6
ENSMUSG00000037348	3550	143.905	298.313	1.05208	0.000123271	0.00645968	Up	Paqr7
ENSMUSG00000037411	3011	892.801	3457.15	1.95297	1.2e-07	2.88e-05	Up	Serpine1
ENSMUSG00000037418	2080	51.4664	139.565	1.4376	6.2e-06	0.000698904	Up	Best1
ENSMUSG00000037536	3490	180.504	678.087	1.90797	1.18e-08	3.76e-06	Up	Fbxo34
ENSMUSG00000037636	1285	33.7039	87.3394	1.37144	0.000355502	0.0141096	Up	Slc25a43
ENSMUSG00000037933	6309	5966.65	10331.4	0.792044	0.00187397	0.0449175	Up	Bicd2
ENSMUSG00000038034	2866	1541.2	2590.82	0.749418	3.13e-05	0.00225592	Up	Igsf8
ENSMUSG00000038295	3902	171.06	423.365	1.30861	2.35e-05	0.00190025	Up	Atg9b
ENSMUSG00000038319	4221	91.7187	211.332	1.20235	0.000150315	0.00754656	Up	Kcnh2
ENSMUSG00000038763	6369	442.98	848.127	0.93793	2.31e-07	5e-05	Up	Alpk3
ENSMUSG00000038886	6554	2736.88	5253.13	0.940764	2.05e-15	3.86e-12	Up	Man2a2
ENSMUSG00000039179	1803	58.5465	153.789	1.39476	1.57e-05	0.00140967	Up	Tekt5
ENSMUSG00000039323	1307	1051.71	3468.36	1.72126	1.93e-09	7.4e-07	Up	Igfbp2
ENSMUSG00000039377	2278	205.423	407.929	0.989145	2.24e-05	0.0018418	Up	Hlx
ENSMUSG00000039824	1243	561.727	1180.26	1.07111	1.11e-13	1.15e-10	Up	Myl6b
ENSMUSG00000040133	3899	249.585	489.714	0.971913	1.59e-06	0.000232393	Up	Gpr176
ENSMUSG00000040152	5848	106732	359108	1.75042	2.3e-15	3.86e-12	Up	Thbs1
ENSMUSG00000040690	5206	743.886	1312.17	0.818453	5.09e-06	0.00060484	Up	Col16a1
ENSMUSG00000040714	1901	70.8616	164.295	1.21039	2.95e-05	0.00218988	Up	Klc3
ENSMUSG00000040734	3130	686.681	1062.45	0.630067	0.00109473	0.0316235	Up	Ppp1r13l
ENSMUSG00000040747	1742	729.892	1472.41	1.01219	0.000536404	0.0192918	Up	Cd53
ENSMUSG00000040752	6113	96.5853	224.176	1.21383	0.00104776	0.0307336	Up	Myh6
ENSMUSG00000040907	3895	934.851	1442.61	0.625943	0.000348359	0.0138672	Up	Atp1a3
ENSMUSG00000041263	3706	356.943	588.13	0.720792	7.79e-06	0.000822827	Up	Rusc1
ENSMUSG00000041577	3615	1491.39	3856.54	1.3705	0.00010568	0.00569356	Up	Prelp
ENSMUSG00000041605	2988	549.103	854.205	0.637694	0.000603981	0.0209907	Up	Inava
ENSMUSG00000041886	6937	326.439	834.612	1.35389	0.00208928	0.0484615	Up	Macc1
ENSMUSG00000042190	2882	601.391	1434.96	1.25416	1.01e-06	0.000158129	Up	Cmklr1
ENSMUSG00000042254	4153	5086.49	9693.93	0.930356	6.76e-13	5.04e-10	Up	Cilp
ENSMUSG00000042363	3362	531.989	892.786	0.746661	0.000972234	0.0295079	Up	Lgalsl
ENSMUSG00000042821	1621	752.219	1913.54	1.34684	3.57e-15	5.32e-12	Up	Snai1
ENSMUSG00000043017	3305	134.104	237.96	0.825851	0.00126693	0.0344384	Up	Ptgir
ENSMUSG00000043091	1982	6249.75	11059.3	0.823356	6.33e-07	0.000108861	Up	Tuba1c
ENSMUSG00000043670	2953	19.5508	55.7932	1.50856	0.00154471	0.0393959	Up	Diras1
ENSMUSG00000043760	12935	284.639	625.607	1.13709	1.72e-08	5.25e-06	Up	Pkhd1
ENSMUSG00000044017	5163	537.278	872.544	0.699185	0.000325862	0.0131372	Up	Adgrd1
ENSMUSG00000044339	1073	36.2732	80.046	1.14259	0.00187505	0.0449175	Up	Alkbh2
ENSMUSG00000044456	3892	953.317	1486.47	0.64105	0.000319653	0.0130339	Up	Rin3
ENSMUSG00000044951	5859	1644.09	2725.43	0.729124	0.00120306	0.0333451	Up	Mylk4
ENSMUSG00000045555	1529	14.9124	58.17	1.9578	0.000647362	0.0217653	Up	Mettl24
ENSMUSG00000045664	3411	602.927	912.421	0.59796	0.000499555	0.0183603	Up	Cdc42ep2
ENSMUSG00000045752	1735	271.124	605.8	1.16002	6.07e-05	0.00360526	Up	Tssc4
ENSMUSG00000045763	1855	5207.96	8104.36	0.637933	3.23e-05	0.00229406	Up	Basp1
ENSMUSG00000046223	2009	201.961	469.157	1.21519	0.00114696	0.0323246	Up	Plaur
ENSMUSG00000046694	2287	64.6489	146.282	1.17995	0.000245841	0.0109204	Up	Tent5b
ENSMUSG00000046807	4601	27.6534	161.876	2.54386	4.11e-06	0.00049657	Up	Lrrc75b
ENSMUSG00000047747	9682	3081.12	6193.5	1.00723	7.51e-08	1.86e-05	Up	Rnf150
ENSMUSG00000047842	4786	21.3308	70.0255	1.71371	0.000174139	0.0085258	Up	Diras2
ENSMUSG00000047878	2092	1227.29	2230.18	0.861913	5.65e-09	1.9e-06	Up	A4galt
ENSMUSG00000048387	2012	136.449	280.967	1.04071	0.000614417	0.0212018	Up	Osr1
ENSMUSG00000049420	4115	79.0266	199.005	1.33101	0.000965972	0.0294888	Up	Tmem200a
ENSMUSG00000049555	2802	75.459	159.34	1.07627	0.000982778	0.0295546	Up	Tmie
ENSMUSG00000049641	1650	305.895	641.755	1.06989	4.45e-08	1.24e-05	Up	Vgll2
ENSMUSG00000049719	1257	206.448	376.525	0.866274	4.26e-05	0.00282948	Up	Prss46
ENSMUSG00000049871	5403	241.19	438.43	0.861172	1.79e-05	0.00151748	Up	Nlrc3
ENSMUSG00000050777	1311	597.285	1164.48	0.963375	0.000638215	0.0215659	Up	Tmem37
ENSMUSG00000051339	10238	2308.85	3949.5	0.774406	1.94e-10	8.99e-08	Up	2900026A02Rik
ENSMUSG00000051457	3743	340.799	640.014	0.908683	0.00138713	0.036487	Up	Spn
ENSMUSG00000052146	887	3228.07	5023.33	0.637968	0.000199506	0.00932533	Up	Rps10
ENSMUSG00000052374	3013	342.019	727.496	1.08869	1.07e-05	0.00104099	Up	Actn2
ENSMUSG00000053007	7917	119.179	265.181	1.15521	0.001588	0.0401188	Up	Creb5
ENSMUSG00000053093	6230	576.452	1237.93	1.10229	2.93e-05	0.00218988	Up	Myh7
ENSMUSG00000053113	2552	1286.48	2155.99	0.744982	2.27e-09	8.24e-07	Up	Socs3
ENSMUSG00000053317	723	640.561	1213.19	0.921402	0.000312235	0.0128093	Up	Sec61b
ENSMUSG00000053647	2537	355.555	687.049	0.949709	9.3e-05	0.00518901	Up	Gper1
ENSMUSG00000054342	3637	455.718	766.138	0.74884	0.000422475	0.0161324	Up	Kcnn4
ENSMUSG00000054672	4372	41.3313	129.311	1.64175	0.00101097	0.0299975	Up	5830411N06Rik
ENSMUSG00000054675	2242	1993.36	3146.97	0.658585	0.00015949	0.00786602	Up	Tmem119
ENSMUSG00000054793	2161	373.539	589.792	0.658727	5.77e-05	0.00353531	Up	Cadm4
ENSMUSG00000055407	4920	1486.73	2674.92	0.847467	8.16e-06	0.000849151	Up	Map6
ENSMUSG00000056174	4332	227.402	616.911	1.43873	1.78e-05	0.00151726	Up	Col8a2
ENSMUSG00000056481	2605	417.452	1033.07	1.30671	3.84e-07	7.47e-05	Up	Cd248
ENSMUSG00000056917	3812	561.569	891.702	0.667646	0.000301654	0.0126065	Up	Sipa1
ENSMUSG00000057337	6108	427.758	757.748	0.824148	2.82e-05	0.00216072	Up	Chst3
ENSMUSG00000057726	1927	183.625	445.079	1.27669	0.00109616	0.0316235	Up	Serpinb9g
ENSMUSG00000057762	1030	269.198	411.928	0.613297	0.00107503	0.0312154	Up	NA
ENSMUSG00000057789	2387	1275.88	2681.61	1.07199	7.12e-06	0.000764067	Up	Bak1
ENSMUSG00000059674	3489	208.287	341.275	0.711032	0.000600021	0.0209072	Up	Cdh24
ENSMUSG00000059810	4698	1027.3	1555	0.598502	0.00013153	0.00673466	Up	Rgs3
ENSMUSG00000060470	3034	112.233	246.3	1.13378	3e-05	0.00220274	Up	Adgrg3
ENSMUSG00000061451	4006	525.489	920.079	0.808581	0.00030642	0.0127264	Up	Tmem151a
ENSMUSG00000061859	7416	944.055	1467.58	0.636464	1.16e-06	0.000177542	Up	Patj
ENSMUSG00000062342	1923	49.5026	123.39	1.32011	0.000310598	0.0127812	Up	Serpinb9e
ENSMUSG00000062380	1868	737.385	1777.2	1.2688	0.000181666	0.00881361	Up	Tubb3
ENSMUSG00000062609	5705	38.4267	108.981	1.50096	0.00111949	0.0320662	Up	Kcnj15
ENSMUSG00000062825	1952	26953.7	48797	0.856299	2.03e-11	1.24e-08	Up	Actg1
ENSMUSG00000063838	1025	274.344	501.99	0.871734	2.87e-05	0.00217251	Up	Cdc42ep5
ENSMUSG00000064179	1059	3193.22	5043.25	0.659298	0.000994377	0.0297758	Up	Tnnt1
ENSMUSG00000068220	800	36873.9	57175.8	0.632798	4.81e-08	1.32e-05	Up	Lgals1
ENSMUSG00000068227	4194	81.6301	189.215	1.21258	1.68e-06	0.000242914	Up	Il2rb
ENSMUSG00000068614	1473	3432.91	8318.22	1.27682	1e-17	2.24e-14	Up	Actc1
ENSMUSG00000070713	1151	407.473	629.666	0.628287	0.000440041	0.0166286	Up	NA
ENSMUSG00000071552	919	60.5382	130.44	1.10695	0.000237188	0.0106417	Up	Tigit
ENSMUSG00000071637	3746	392.64	902.819	1.20149	0.000342322	0.0136674	Up	Cebpd
ENSMUSG00000072941	3738	1417.11	2923.49	1.04452	5.71e-08	1.5e-05	Up	Sod3
ENSMUSG00000073771	1956	272.871	452.092	0.727731	0.00210125	0.0485169	Up	NA
ENSMUSG00000074217	1351	29.9799	98.99	1.71985	7.96e-05	0.00446677	Up	2210011C24Rik
ENSMUSG00000074676	1311	267.201	527.815	0.981203	2.71e-07	5.62e-05	Up	Foxs1
ENSMUSG00000078949	1094	330.76	659.05	0.993704	2.71e-05	0.00209826	Up	R3hdml
ENSMUSG00000079283	1017	123.542	269.184	1.12306	1.45e-05	0.00132326	Up	2310009B15Rik
ENSMUSG00000079471	804	1757.03	2683.77	0.611085	2.25e-05	0.0018436	Up	Mymx
ENSMUSG00000079592	1365	227.756	431.698	0.922711	2.9e-05	0.00218771	Up	C1qtnf5
ENSMUSG00000079641	612	1697.72	2919.36	0.782244	0.00019404	0.0091335	Up	Rpl39
ENSMUSG00000086596	4083	600.629	971.174	0.693356	5.01e-05	0.00314165	Up	Susd5
ENSMUSG00000090053	3271	302.859	537.035	0.826525	0.0016116	0.0403901	Up	Palm2
ENSMUSG00000090958	4576	577.565	928.146	0.683912	0.000125699	0.00651064	Up	Lrrc32
ENSMUSG00000098488	4240	9.94834	53.0909	2.41924	0.000114894	0.00609211	Up	Pla2g4b
ENSMUSG00000110206	2482	71.9034	145.272	1.01632	0.00111313	0.0319758	Up	Flt3l
ENSMUSG00000115302	4738	16.7691	217.95	3.69978	1.76e-05	0.00151614	Up	NA
ENSMUSG00000031842	3452	5.08026	37.2712	2.85953	0.00177552	0.0431497	Up	Pde4c
ENSMUSG00000056888	1183	4.76271	57.1245	3.56308	4.44e-06	0.000531375	Up	Glipr1
ENSMUSG00000074195	2997	2.53997	22.5682	3.12837	0.00193644	0.045734	Up	Clca4b
ENSMUSG00000004415	2781	1.26977	23.6222	4.18697	0.000397175	0.0153107	Up	Col26a1
ENSMUSG00000031026	9250	0.634884	22.9474	5.13494	0.000111752	0.00599662	Up	Trim66
ENSMUSG00000045903	3791	0.952326	28.6109	4.87069	2.12e-05	0.00176316	Up	Npas4
ENSMUSG00000031613	1683	0	25.9006	7.15285	1.12e-06	0.000171951	Up	Hpgd
ENSMUSG00000032291	802	0	17.3077	6.57105	3.72e-05	0.00254372	Up	Crabp1
ENSMUSG00000032528	4902	0	21.2986	6.87039	3.16e-06	0.000405936	Up	Vipr1
ENSMUSG00000117406	5038	0	9.9812	5.77695	0.00112918	0.0320662	Up	Ntn3

## Sheet: D2HG vs Control （2nd）
GeneID	Length	NTC-Expression	D2_HG-Expression	log2FoldChange(D2_HG/NTC)	Pvalue	Padj	Up/Down-Regulation(D2_HG/NTC)	SYMBOL
ENSMUSG00000000378	1858	1025.53	666.551	-0.622129	2.72e-05	0.000890783	Down	Ccm2
ENSMUSG00000000555	4415	7230.89	4264.5	-0.761927	2.59e-05	0.000859035	Down	Itga5
ENSMUSG00000000693	4098	5239.66	1000.69	-2.38874	0.000578377	0.00844663	Down	Loxl3
ENSMUSG00000000753	1832	19047.8	5786.59	-1.7189	0.000194722	0.00403433	Down	Serpinf1
ENSMUSG00000001020	498	14166.1	6796.86	-1.05957	2.65e-06	0.000140718	Down	S100a4
ENSMUSG00000001131	883	6063	2648.73	-1.19458	2.11e-06	0.000117727	Down	Timp1
ENSMUSG00000001134	875	209.653	117.146	-0.839718	0.00397072	0.0308443	Down	Uxt
ENSMUSG00000001228	3586	543.69	145.397	-1.90137	3.56e-12	1.02e-09	Down	Uhrf1
ENSMUSG00000001334	2763	149.344	67.2537	-1.14864	0.00115905	0.0140855	Down	Fndc5
ENSMUSG00000001403	2191	505.261	192.05	-1.39396	0.00118121	0.0142668	Down	Ube2c
ENSMUSG00000001435	5595	1995.98	399.158	-2.32278	0.000135927	0.00308571	Down	Col18a1
ENSMUSG00000001506	5930	26323.5	3682.85	-2.83753	2.03e-05	0.000705488	Down	Col1a1
ENSMUSG00000001517	4652	538.64	126.806	-2.08805	3.53e-09	4.33e-07	Down	Foxm1
ENSMUSG00000001525	2649	15269.1	5436.87	-1.48988	6.86e-13	2.3e-10	Down	Tubb5
ENSMUSG00000001542	5126	1721.05	824.773	-1.06168	0.00560504	0.0384393	Down	Ell2
ENSMUSG00000001555	2584	6125.26	3384.07	-0.855832	4.28e-06	0.000205129	Down	Fkbp10
ENSMUSG00000001663	1105	85.5943	13.7107	-2.65342	8.65e-07	5.46e-05	Down	Gstt1
ENSMUSG00000001741	5260	55.5269	6.55455	-3.10163	1.82e-07	1.39e-05	Down	Il16
ENSMUSG00000002014	2568	1334.2	792.915	-0.751415	0.00831509	0.0490326	Down	Ssr4
ENSMUSG00000002020	6769	5555.24	1073.74	-2.37144	0.000526258	0.00788217	Down	Ltbp2
ENSMUSG00000002068	2000	222.951	74.606	-1.58395	0.000323978	0.00569994	Down	Ccne1
ENSMUSG00000002105	2469	3963.01	2320.28	-0.772348	9.71e-07	6.04e-05	Down	Slc39a13
ENSMUSG00000002227	3718	594.19	363.861	-0.707717	0.000503319	0.00766795	Down	Mov10
ENSMUSG00000002602	4265	13003.1	6095.38	-1.09313	0.00501989	0.0357192	Down	Axl
ENSMUSG00000002771	5431	103.594	51.4858	-1.00346	0.00251366	0.0230886	Down	Grin2d
ENSMUSG00000002778	1599	2794.67	1728.72	-0.692979	0.00329195	0.0270603	Down	Kdelr1
ENSMUSG00000002845	2871	1366.05	597.338	-1.19392	0.00358148	0.0286123	Down	Tmem39a
ENSMUSG00000002847	1974	2127.24	894.039	-1.25096	0.00852721	0.0498974	Down	Pla1a
ENSMUSG00000002908	4047	229.571	75.3164	-1.60812	3.36e-11	7.31e-09	Down	Kcnn1
ENSMUSG00000002944	3399	668.85	295.817	-1.17813	0.00299086	0.025556	Down	Cd36
ENSMUSG00000002980	2429	594.715	371.732	-0.67824	0.0006257	0.00889376	Down	Bcam
ENSMUSG00000002983	3273	559.349	290.857	-0.944694	0.00385963	0.0302136	Down	Relb
ENSMUSG00000003355	2411	359.994	156.262	-1.20427	8.94e-07	5.59e-05	Down	Fkbp11
ENSMUSG00000003363	2297	2817.52	1787.4	-0.656752	2.05e-06	0.00011536	Down	Pld3
ENSMUSG00000003575	10265	1021.15	400.198	-1.35244	0.000742636	0.0101454	Down	Crtc1
ENSMUSG00000003762	2804	498.432	304.354	-0.71309	0.00098184	0.012472	Down	Coq8b
ENSMUSG00000003779	3674	1858.38	491.969	-1.91666	5.36e-18	4.54e-15	Down	Kif20a
ENSMUSG00000004098	6119	3183.43	467.905	-2.7668	0.000252607	0.00483327	Down	Col5a3
ENSMUSG00000004127	4258	861.785	561.053	-0.618228	0.000874854	0.0114296	Down	Trmt10a
ENSMUSG00000004266	2308	63.33	28.4875	-1.15142	0.00279236	0.0244991	Down	Ptpn6
ENSMUSG00000004473	2978	25.8068	5.57328	-2.19375	0.00440739	0.0331869	Down	Clec11a
ENSMUSG00000004530	5130	3910.71	1692.01	-1.20892	0.00383925	0.030149	Down	Coro1c
ENSMUSG00000004540	2100	8.57936	0	-5.5339	0.00124652	0.0148857	Down	Psg17
ENSMUSG00000004665	2460	9489.27	2561.69	-1.88938	6.4e-11	1.26e-08	Down	Cnn2
ENSMUSG00000004846	3280	4132.68	1839.4	-1.16807	0.000471892	0.00739387	Down	Plod3
ENSMUSG00000004891	6126	64032.9	38215.4	-0.744671	0.00164485	0.0177663	Down	Nes
ENSMUSG00000004952	3967	1130.99	737.309	-0.616751	0.00134293	0.0155905	Down	Rasa4
ENSMUSG00000005087	5614	8124.75	4231.74	-0.941165	6.61e-09	7.81e-07	Down	Cd44
ENSMUSG00000005465	2931	44.9562	16.8426	-1.42605	0.00562924	0.0385472	Down	Il27ra
ENSMUSG00000005470	1788	422.132	153.688	-1.4567	0.000305436	0.00548487	Down	Asf1b
ENSMUSG00000005611	6198	34.6938	12.1181	-1.51274	0.00756103	0.0461888	Down	Mrvi1
ENSMUSG00000005716	977	207.707	10.9732	-4.25368	0.000317156	0.00562982	Down	Pvalb
ENSMUSG00000005774	4450	699.072	389.307	-0.843929	5.5e-06	0.000249309	Down	Rfx5
ENSMUSG00000006219	3101	1664.39	806.876	-1.04515	9.1e-11	1.76e-08	Down	Fblim1
ENSMUSG00000006360	1809	1674.73	896.4	-0.901367	0.00305707	0.0258164	Down	Crip1
ENSMUSG00000006395	912	191.586	95.4363	-1.00424	0.00452901	0.033791	Down	Hyi
ENSMUSG00000006457	2887	13859	7347.36	-0.915592	4.99e-07	3.4e-05	Down	Actn3
ENSMUSG00000006575	2046	373.442	233.757	-0.674463	0.00168712	0.017992	Down	Rundc3a
ENSMUSG00000006651	2472	342.353	148.797	-1.20418	0.00309213	0.0259539	Down	Aplp1
ENSMUSG00000006715	1127	202.201	109.872	-0.876411	0.00650707	0.0419091	Down	Gmnn
ENSMUSG00000006931	2178	4819.38	2727.68	-0.821143	6.86e-12	1.82e-09	Down	P3h4
ENSMUSG00000007080	7163	326.523	73.3289	-2.15495	2e-14	9.47e-12	Down	Pole
ENSMUSG00000007097	6227	2888.9	1600.19	-0.852359	1.62e-07	1.28e-05	Down	Atp1a2
ENSMUSG00000007122	1847	2096.56	575.188	-1.86645	0.000379937	0.00637809	Down	Casq1
ENSMUSG00000007646	3944	182.676	110.111	-0.733473	0.00454462	0.0338574	Down	Rad51c
ENSMUSG00000007805	2525	319.269	180.126	-0.824136	0.000389549	0.00647225	Down	Twist2
ENSMUSG00000007837	1623	261.309	164.719	-0.666526	0.00572357	0.038835	Down	Prrg2
ENSMUSG00000007888	1644	7280.22	2553.58	-1.5113	5.04e-30	2.31e-26	Down	Crlf1
ENSMUSG00000008140	1872	1188.38	676.076	-0.813823	0.00268406	0.0240082	Down	Emc10
ENSMUSG00000009076	792	410.574	216.133	-0.927757	0.00788969	0.0473081	Down	Zmat5
ENSMUSG00000010660	2715	1092.7	433.436	-1.33493	0.00020598	0.00419181	Down	Plcd1
ENSMUSG00000011148	1819	2219.99	1423.99	-0.640768	0.000614984	0.008846	Down	Adssl1
ENSMUSG00000011658	2717	323.8	181.98	-0.833176	0.00202111	0.0201895	Down	Fuz
ENSMUSG00000012114	3475	1969.8	1260.55	-0.644205	0.00583454	0.0392306	Down	Med15
ENSMUSG00000012123	5578	96.8919	28.2061	-1.78787	0.00028076	0.00516366	Down	Crybg2
ENSMUSG00000012396	2211	8.62609	0	-5.5409	0.00107546	0.0133772	Down	Nanog
ENSMUSG00000012443	4819	821.686	120.046	-2.77718	1.91e-05	0.000678021	Down	Kif11
ENSMUSG00000012889	3011	2633.82	697.684	-1.91691	0.00174051	0.0184045	Down	Podnl1
ENSMUSG00000013033	8181	2484.29	880.251	-1.49725	0.000230574	0.00451209	Down	Adgrl1
ENSMUSG00000014599	4176	7480.64	3695.38	-1.01735	1.94e-05	0.000682012	Down	Csf1
ENSMUSG00000014813	4197	244.996	24.7189	-3.30423	1.97e-10	3.62e-08	Down	Stc1
ENSMUSG00000014859	1993	1572.54	1029.74	-0.610996	0.000890886	0.0115731	Down	E2f4
ENSMUSG00000015027	2557	787.298	260.701	-1.59558	0.000500072	0.00763539	Down	Galns
ENSMUSG00000015090	1327	46.4431	13.2523	-1.81115	0.000496697	0.00760191	Down	Ptgds
ENSMUSG00000015354	4438	703.353	258.898	-1.44317	0.000454683	0.00718973	Down	Pcolce2
ENSMUSG00000015647	11388	9871.5	5008.63	-0.978936	5.53e-06	0.000249309	Down	Lama5
ENSMUSG00000015668	1626	1283.04	845.348	-0.60202	0.000407568	0.00666697	Down	Pdzd11
ENSMUSG00000015880	3975	509.724	95.7181	-2.4154	3.6e-07	2.55e-05	Down	Ncapg
ENSMUSG00000015957	3451	48.3756	15.3388	-1.6457	0.00155768	0.0171903	Down	Wnt11
ENSMUSG00000016382	3242	17166.7	7449.62	-1.20442	0.00351239	0.0282243	Down	Pls3
ENSMUSG00000016494	3063	1937.16	834.044	-1.21637	4.17e-09	5.03e-07	Down	Cd34
ENSMUSG00000017146	6572	311.161	55.0304	-2.50443	1.94e-05	0.00068213	Down	Brca1
ENSMUSG00000017314	4089	397.865	235.068	-0.76112	0.00132979	0.0155092	Down	Mpp2
ENSMUSG00000017721	2611	1912.33	1261.05	-0.600498	0.00137736	0.0158697	Down	Pigt
ENSMUSG00000017740	6028	12.6932	0	-6.09828	0.000220046	0.00439357	Down	Slc12a5
ENSMUSG00000017817	4211	6801.88	2992.34	-1.18478	0.00800035	0.0476866	Down	Jph2
ENSMUSG00000017861	3651	85.8508	22.9049	-1.90028	0.000187701	0.00393629	Down	Mybl2
ENSMUSG00000017969	2107	1272.66	645.326	-0.980201	1.23e-07	1.03e-05	Down	Ptgis
ENSMUSG00000018042	2547	26964.1	15378	-0.810206	0.00141421	0.0161054	Down	Cyb5r3
ENSMUSG00000018340	2489	17246.2	9675.61	-0.8339	3.54e-05	0.00109057	Down	Anxa6
ENSMUSG00000018470	2538	132.785	60.8513	-1.12978	0.00178722	0.0186123	Down	Kcnab3
ENSMUSG00000018507	3671	102.273	29.222	-1.8119	2.36e-06	0.000128696	Down	Trpv2
ENSMUSG00000018752	2235	316.089	188.514	-0.747369	0.00818302	0.0484605	Down	Tnfsfm13
ENSMUSG00000018819	2665	5136.87	1930.01	-1.41249	9.7e-05	0.00242282	Down	Lsp1
ENSMUSG00000018893	1104	1960.03	954.141	-1.03894	1.05e-06	6.5e-05	Down	Mb
ENSMUSG00000018909	7135	251.106	61.2554	-2.03654	0.000294882	0.0053463	Down	Arrb1
ENSMUSG00000018983	4739	956.624	269.936	-1.82632	0.00332241	0.0272548	Down	E2f2
ENSMUSG00000019055	4097	4052.91	2251.82	-0.848106	0.000194131	0.00402815	Down	Plod1
ENSMUSG00000019122	3006	81.3613	19.8811	-2.03942	2.36e-06	0.000128696	Down	Ccl9
ENSMUSG00000019214	3812	116.329	37.6564	-1.62365	0.000568881	0.00838656	Down	Chtf18
ENSMUSG00000019256	5548	2722.68	827.368	-1.71875	0.00526233	0.0369168	Down	Ahr
ENSMUSG00000019278	2236	49.5821	21.7155	-1.18718	0.00779685	0.0469415	Down	Dpep1
ENSMUSG00000019338	5208	1065.39	564.562	-0.916918	0.00232426	0.022174	Down	Zfp687
ENSMUSG00000019359	2858	97.9004	7.69368	-3.68521	0.0021171	0.0207295	Down	Gdpd2
ENSMUSG00000019942	4375	820.586	260.32	-1.65798	2.35e-07	1.76e-05	Down	Cdk1
ENSMUSG00000019997	2490	3769.95	1399.02	-1.42987	1.55e-05	0.000565546	Down	Ccn2
ENSMUSG00000020032	5558	5439.61	1400.14	-1.95814	0.000908596	0.0117707	Down	Nuak1
ENSMUSG00000020044	4722	56856.3	13120	-2.11556	0.00607743	0.0401186	Down	Timp3
ENSMUSG00000020048	3222	42821.8	21102.3	-1.02096	0.00402316	0.0310794	Down	Hsp90b1
ENSMUSG00000020059	1169	33.4244	3.41288	-3.31155	1.04e-05	0.000413472	Down	Sycp3
ENSMUSG00000020092	4282	1229.62	507.824	-1.27646	0.00244172	0.0227785	Down	Pald1
ENSMUSG00000020099	5869	6915.38	2028.25	-1.76974	6.53e-05	0.00178341	Down	Unc5b
ENSMUSG00000020150	988	583.23	312.036	-0.901259	0.00739155	0.0454381	Down	Gamt
ENSMUSG00000020154	11911	96.8158	5.6222	-4.12176	0.0083996	0.0493606	Down	Ptprb
ENSMUSG00000020175	3291	183.876	98.9847	-0.896887	0.00706811	0.0443657	Down	Rab36
ENSMUSG00000020303	3982	340.989	179.881	-0.923597	2.73e-06	0.00014348	Down	Stc2
ENSMUSG00000020325	1955	1272.18	716.328	-0.828068	0.00785248	0.0471732	Down	Fstl3
ENSMUSG00000020330	3892	1262.05	392.644	-1.6834	4.69e-14	2.01e-11	Down	Hmmr
ENSMUSG00000020422	7897	14995.7	5529.49	-1.43938	0.00783188	0.0471221	Down	Tns3
ENSMUSG00000020435	4097	177.396	49.4868	-1.84627	0.00104775	0.0131001	Down	Osbp2
ENSMUSG00000020456	4127	6744.38	3525.69	-0.935898	0.00392616	0.0306018	Down	Ogdh
ENSMUSG00000020484	2129	2613.22	906.308	-1.52812	0.00117988	0.0142633	Down	Xbp1
ENSMUSG00000020493	3824	503.111	97.5495	-2.37071	4.05e-14	1.8e-11	Down	Prr11
ENSMUSG00000020571	2175	10319.8	5820.72	-0.826198	5.81e-10	9.19e-08	Down	Pdia6
ENSMUSG00000020592	3157	12195.4	6006.63	-1.02177	0.00166979	0.0178802	Down	Sdc1
ENSMUSG00000020601	4198	385.367	190.751	-1.01264	4.71e-05	0.00138039	Down	Trib2
ENSMUSG00000020617	2035	13.0319	0	-6.13336	7.2e-05	0.0019267	Down	1700012B07Rik
ENSMUSG00000020766	1406	1018.72	544.234	-0.904747	8e-05	0.00207202	Down	Galk1
ENSMUSG00000020808	1513	496.563	35.2085	-3.82342	3.48e-05	0.00108068	Down	Pimreg
ENSMUSG00000020866	8383	18.2998	1.49925	-3.67628	0.00811521	0.0482251	Down	Cacna1g
ENSMUSG00000020868	3442	873.611	529.337	-0.722882	0.000102415	0.00253861	Down	Xylt2
ENSMUSG00000020886	6326	1632.09	921.929	-0.823974	1.04e-08	1.16e-06	Down	Dlg4
ENSMUSG00000020897	1950	165.37	67.4106	-1.29177	0.000433084	0.0069359	Down	Aurkb
ENSMUSG00000020908	6031	32035.4	17090.7	-0.906478	0.00048605	0.00748778	Down	Myh3
ENSMUSG00000020914	5221	3834.01	539.616	-2.82936	1.26e-05	0.000477913	Down	Top2a
ENSMUSG00000020926	5102	46.5509	12.4729	-1.91226	0.00111538	0.013737	Down	Adam11
ENSMUSG00000020941	4246	1203.38	576.066	-1.06344	0.00645029	0.0416996	Down	Map3k14
ENSMUSG00000021136	3496	12.5146	0.641134	-4.24119	0.00262483	0.0236814	Down	Smoc1
ENSMUSG00000021175	2957	241.152	143.151	-0.755337	0.0017675	0.0186041	Down	Cdca7l
ENSMUSG00000021253	3383	10082.4	5563.24	-0.857929	0.00416674	0.03186	Down	Tgfb3
ENSMUSG00000021255	4300	18.8541	0.749627	-4.77241	0.00028129	0.0051665	Down	Esrrb
ENSMUSG00000021260	5174	379.291	224.296	-0.759178	0.00741542	0.045481	Down	Hhipl1
ENSMUSG00000021319	4049	52.6663	9.33119	-2.50778	7.61e-05	0.00199665	Down	Sfrp4
ENSMUSG00000021360	4352	764.56	281.557	-1.44226	3.86e-13	1.36e-10	Down	Gcnt2
ENSMUSG00000021367	2139	136.603	63.4598	-1.11111	0.000397385	0.00653926	Down	Edn1
ENSMUSG00000021388	2329	163.454	42.6415	-1.9455	4.31e-05	0.00127918	Down	Aspn
ENSMUSG00000021391	2059	66.7629	7.6541	-3.14031	0.00761338	0.0464055	Down	Cenpp
ENSMUSG00000021404	1902	188.249	53.5947	-1.81675	0.00486412	0.0351079	Down	Serpinb9c
ENSMUSG00000021451	4482	512.314	99.2334	-2.37034	0.00348999	0.0281594	Down	Sema4d
ENSMUSG00000021453	1071	2681.28	699.954	-1.93809	2.95e-05	0.000951698	Down	Gadd45g
ENSMUSG00000021457	5363	273.9	76.0029	-1.84821	4.56e-12	1.25e-09	Down	Syk
ENSMUSG00000021485	1742	102.755	19.9211	-2.35913	0.000903612	0.0117273	Down	Mxd3
ENSMUSG00000021508	1827	339.655	29.227	-3.54866	1.18e-17	8.99e-15	Down	Cxcl14
ENSMUSG00000021556	3954	751.054	478.666	-0.650486	8.05e-05	0.00207739	Down	Golm1
ENSMUSG00000021567	4016	1423.41	291.906	-2.28656	0.00353957	0.0283764	Down	Nkd2
ENSMUSG00000021569	3399	135.221	37.9419	-1.83952	1.9e-09	2.47e-07	Down	Trip13
ENSMUSG00000021572	5205	23.0386	7.14144	-1.70468	0.00519084	0.0365645	Down	Cep72
ENSMUSG00000021587	5040	7.78489	0	-5.39044	0.00273742	0.0242693	Down	Pcsk1
ENSMUSG00000021591	4228	1348.07	655.874	-1.03942	1.68e-13	6.62e-11	Down	Glrx
ENSMUSG00000021608	3675	627.928	341.766	-0.876223	2.37e-06	0.000128696	Down	Lpcat1
ENSMUSG00000021675	2502	19.7276	0.641134	-4.89329	0.000524195	0.00787845	Down	F2rl2
ENSMUSG00000021697	2563	28.6477	2.02212	-3.82528	1.47e-05	0.000542426	Down	Depdc1b
ENSMUSG00000021707	5347	277.295	151.225	-0.874665	0.00713922	0.0445618	Down	Dhfr
ENSMUSG00000021730	14141	8.97399	0	-5.59679	0.00326199	0.0268953	Down	Hcn1
ENSMUSG00000021760	1042	5731.14	3599.35	-0.67119	0.000843263	0.0111761	Down	Gpx8
ENSMUSG00000021822	2342	2528.05	1506.44	-0.746988	8.69e-07	5.46e-05	Down	Plau
ENSMUSG00000021823	5267	24669.2	9666.5	-1.35168	0.00111264	0.0137248	Down	Vcl
ENSMUSG00000021835	2064	1738.44	768.653	-1.17748	0.00284878	0.0248042	Down	Bmp4
ENSMUSG00000021978	6013	5258.17	3173.06	-0.728789	0.00303631	0.0257366	Down	Extl3
ENSMUSG00000022018	918	336.86	180.056	-0.906354	0.00279815	0.0245342	Down	Rgcc
ENSMUSG00000022033	1720	339.081	62.2612	-2.4506	5.35e-10	8.66e-08	Down	Pbk
ENSMUSG00000022034	3996	276.012	78.7608	-1.80653	0.000380936	0.00638312	Down	Esco2
ENSMUSG00000022054	3680	105.006	47.017	-1.16332	0.0011388	0.0138887	Down	Nefm
ENSMUSG00000022055	3380	156.594	37.7747	-2.04603	8.16e-12	2.08e-09	Down	Nefl
ENSMUSG00000022090	2635	3655.82	1698.58	-1.10611	0.000621494	0.00888763	Down	Pdlim2
ENSMUSG00000022098	5365	10329.4	4462.38	-1.21096	0.00165677	0.0178311	Down	Bmp1
ENSMUSG00000022156	916	17.6612	0	-6.57789	1.71e-05	0.000615444	Down	Gzme
ENSMUSG00000022206	6892	153.936	58.8491	-1.38511	6.16e-08	5.58e-06	Down	Npr3
ENSMUSG00000022296	3963	534.359	288.743	-0.888944	0.000555659	0.00823218	Down	Baalc
ENSMUSG00000022297	4325	1319.43	809.886	-0.704574	0.00755402	0.0461888	Down	Fzd6
ENSMUSG00000022322	2606	397.239	83.7192	-2.24997	1.43e-07	1.17e-05	Down	Shcbp1
ENSMUSG00000022367	4237	4761.06	952.459	-2.32201	3.98e-15	2.03e-12	Down	Has2
ENSMUSG00000022376	6990	22.0832	0.749627	-5.00648	9.3e-05	0.00233917	Down	Adcy8
ENSMUSG00000022422	3281	55.2642	8.8083	-2.6566	8.19e-05	0.00211071	Down	Dscc1
ENSMUSG00000022438	3784	3189.75	1662.17	-0.940631	0.00493504	0.0353969	Down	Parvb
ENSMUSG00000022440	2402	1832.4	785.557	-1.22226	1.33e-11	3.21e-09	Down	C1qtnf6
ENSMUSG00000022454	3222	47.7597	0	-8.0114	1.59e-09	2.11e-07	Down	Nell2
ENSMUSG00000022475	5179	3271.76	1157.19	-1.49981	8.89e-06	0.000369297	Down	Hdac7
ENSMUSG00000022489	4215	118.606	52.0268	-1.18996	0.00699199	0.0441639	Down	Pde1b
ENSMUSG00000022525	2916	10.0059	0	-5.74765	0.00710567	0.0444129	Down	Plaat1
ENSMUSG00000022766	2191	24.536	1.87407	-3.76565	0.00651763	0.0419378	Down	Serpind1
ENSMUSG00000022827	4332	410.269	184.509	-1.15482	0.00336492	0.0275541	Down	Rabl3
ENSMUSG00000022863	3013	1491.19	905.374	-0.720424	0.000524581	0.00787845	Down	Btg3
ENSMUSG00000023004	1743	17940.7	8101.17	-1.14711	1.54e-09	2.06e-07	Down	Tuba1b
ENSMUSG00000023009	4853	1265	607.062	-1.05992	0.000300057	0.00539592	Down	Nckap5l
ENSMUSG00000023015	4475	1774.24	737.579	-1.26683	2.47e-10	4.41e-08	Down	Racgap1
ENSMUSG00000023032	11790	603.095	334.389	-0.849577	0.00138559	0.0159378	Down	Slc4a8
ENSMUSG00000023088	6792	4869.34	1286.31	-1.92068	0.00621192	0.0406553	Down	Abcc1
ENSMUSG00000023191	2901	1341.19	470.255	-1.51266	0.000497466	0.00760404	Down	P3h3
ENSMUSG00000023232	1881	1199.42	658.011	-0.866835	8.16e-06	0.000345546	Down	Serinc2
ENSMUSG00000023505	1976	393.754	106.074	-1.88937	9.47e-08	8.09e-06	Down	Cdca3
ENSMUSG00000023571	1315	190.401	105.166	-0.854295	0.000798148	0.0106915	Down	C1qtnf12
ENSMUSG00000023882	2832	216.552	94.7582	-1.19399	2.63e-05	0.000873258	Down	Zfp54
ENSMUSG00000023938	3349	471.743	291.108	-0.695783	7.47e-05	0.00197951	Down	Aars2
ENSMUSG00000023940	3628	210.471	66.0056	-1.6692	8.78e-08	7.6e-06	Down	Sgo1
ENSMUSG00000023942	2216	6702.96	3391.46	-0.982994	0.00748327	0.0458358	Down	Slc29a1
ENSMUSG00000023972	4235	1665.24	736.356	-1.17783	8.73e-12	2.18e-09	Down	Ptk7
ENSMUSG00000023973	1908	1163.31	616.834	-0.916157	0.000195887	0.00405137	Down	Cnpy3
ENSMUSG00000023990	2342	402.428	164.718	-1.29098	0.000383625	0.00640477	Down	Tfeb
ENSMUSG00000024048	1937	13432.4	7739.7	-0.795443	0.000762697	0.0103578	Down	Myl12a
ENSMUSG00000024049	5648	2205.83	1439.05	-0.615954	5.53e-05	0.00156758	Down	Myom1
ENSMUSG00000024056	3847	446.931	71.9409	-2.63862	0.000125184	0.00291397	Down	Ndc80
ENSMUSG00000024208	649	861.916	542.219	-0.668195	0.00533138	0.0372736	Down	Uqcc2
ENSMUSG00000024210	2342	1753.35	898.188	-0.965518	0.00347525	0.0281228	Down	Ip6k3
ENSMUSG00000024220	4609	881.533	383.025	-1.20365	0.000494244	0.00758005	Down	Zfp523
ENSMUSG00000024299	4121	503.996	131.647	-1.93904	0.000130786	0.00300873	Down	Adamts10
ENSMUSG00000024420	6206	46.0209	6.51988	-2.84179	0.00707811	0.0443668	Down	Zfp521
ENSMUSG00000024459	2459	13.0968	0	-6.13868	0.000316225	0.00562055	Down	H2-M5
ENSMUSG00000024525	5054	126.209	73.1417	-0.786795	0.00142924	0.0161961	Down	Impa2
ENSMUSG00000024538	1403	6561.11	2680.39	-1.29163	0.00167014	0.0178802	Down	Ppic
ENSMUSG00000024590	2843	638.093	298.19	-1.09646	1.25e-05	0.000477104	Down	Lmnb1
ENSMUSG00000024646	1182	553.75	341.497	-0.698735	0.00466121	0.034383	Down	Cyb5a
ENSMUSG00000024660	3449	679.595	403.666	-0.751454	2.18e-06	0.000120655	Down	Incenp
ENSMUSG00000024679	1418	18.3627	1.12444	-4.11884	0.00172621	0.0183299	Down	Ms4a6d
ENSMUSG00000024791	2024	107.245	31.9008	-1.74312	0.000526834	0.00788217	Down	Cdca5
ENSMUSG00000024793	1661	326.075	94.2589	-1.79416	0.000121729	0.00284317	Down	Tnfrsf25
ENSMUSG00000024795	5564	886.33	123.952	-2.83996	0.000198865	0.00407112	Down	Kif20b
ENSMUSG00000024803	2020	31764.3	11875.4	-1.41945	0.00779466	0.0469415	Down	Ankrd1
ENSMUSG00000024805	6443	1429.58	504.069	-1.50447	0.00597743	0.0397779	Down	Pcgf5
ENSMUSG00000024854	913	1580.97	934.214	-0.758737	0.00653707	0.0419843	Down	Pold4
ENSMUSG00000024885	1924	2331.62	1209.89	-0.946771	0.00139806	0.0159743	Down	Aldh3b1
ENSMUSG00000024909	2634	2141.68	1015.21	-1.07749	9.53e-12	2.34e-09	Down	Efemp2
ENSMUSG00000024910	1564	143.33	34.3854	-2.06417	1.69e-05	0.000611122	Down	Ctsw
ENSMUSG00000024940	5729	14279.7	4622.69	-1.62723	0.00302452	0.0257078	Down	Ltbp3
ENSMUSG00000024989	2757	468.199	78.4301	-2.57754	4.81e-11	9.88e-09	Down	Cep55
ENSMUSG00000024998	9439	42.8201	9.21292	-2.22369	3.34e-05	0.00104806	Down	Plce1
ENSMUSG00000025001	5868	544.129	307.484	-0.825032	0.000260695	0.00493313	Down	Hells
ENSMUSG00000025076	2350	270.112	102.456	-1.40119	0.0047848	0.0348093	Down	Casp7
ENSMUSG00000025154	5103	179.182	113.121	-0.663926	0.00601282	0.0398835	Down	Arhgap19
ENSMUSG00000025172	1138	1369.35	457.271	-1.58151	9.08e-06	0.00037306	Down	Ankrd2
ENSMUSG00000025185	3738	593.546	134.627	-2.14274	4.45e-06	0.000211911	Down	Loxl4
ENSMUSG00000025229	1380	10.03	0	-5.75308	0.000797318	0.0106915	Down	Pitx3
ENSMUSG00000025271	2681	44.5727	2.99851	-3.9275	0.00647234	0.041783	Down	Pfkfb1
ENSMUSG00000025279	4747	214.149	57.9609	-1.88844	0.000577794	0.00844663	Down	Dnase1l3
ENSMUSG00000025328	3310	33.0991	1.38099	-4.60761	3.62e-05	0.00110873	Down	Padi3
ENSMUSG00000025330	3021	7.88808	0	-5.40786	0.00282396	0.0246349	Down	Padi4
ENSMUSG00000025453	3464	2331.62	697.376	-1.74174	0.0055019	0.0379777	Down	Nnt
ENSMUSG00000025574	2490	299.755	95.6371	-1.64625	0.000136827	0.00310103	Down	Tk1
ENSMUSG00000025610	1652	368.498	96.2816	-1.93868	0.00167804	0.0179369	Down	Map3k7cl
ENSMUSG00000025743	4973	1443.88	493.624	-1.5492	0.000179305	0.00380343	Down	Sdc3
ENSMUSG00000025746	2343	129.445	49.0142	-1.40605	5.44e-06	0.00024852	Down	Il6
ENSMUSG00000025747	3884	656.452	372.107	-0.81784	0.000179561	0.00380343	Down	Tyms
ENSMUSG00000025758	3479	557.208	289.977	-0.943592	1.7e-07	1.32e-05	Down	Plk4
ENSMUSG00000025792	2023	326.005	193.893	-0.750445	0.0030218	0.0257078	Down	Slc25a10
ENSMUSG00000025804	2833	14.6676	1.7558	-3.09848	0.00634406	0.0412711	Down	Ccr1
ENSMUSG00000025823	2399	6509.66	2529.53	-1.36388	0.000322717	0.0056991	Down	Pdia4
ENSMUSG00000026039	4939	619.762	125.463	-2.30698	1.57e-06	9.01e-05	Down	Sgo2a
ENSMUSG00000026068	4889	96.7093	20.4284	-2.24777	5.23e-07	3.51e-05	Down	Il18rap
ENSMUSG00000026069	5302	102.296	23.5203	-2.12959	0.00057155	0.00840045	Down	Il1rl1
ENSMUSG00000026072	5819	1651.45	345.787	-2.25643	0.00451313	0.0337522	Down	Il1r1
ENSMUSG00000026141	5441	16.2143	0	-6.45201	1.31e-05	0.000492127	Down	Col19a1
ENSMUSG00000026162	1053	100.638	13.5231	-2.90753	0.0050293	0.0357192	Down	Nhej1
ENSMUSG00000026167	2468	1802.99	421.226	-2.09855	5.73e-06	0.000255758	Down	Wnt10a
ENSMUSG00000026222	3807	191.76	87.9764	-1.12783	0.00152361	0.0169444	Down	Sp100
ENSMUSG00000026253	2780	6562.53	4299.2	-0.610234	2.28e-05	0.000779681	Down	Chrng
ENSMUSG00000026259	3109	530.617	333.28	-0.669884	0.00213363	0.0208182	Down	Ngef
ENSMUSG00000026274	5779	194.712	66.5667	-1.55198	8.51e-09	9.6e-07	Down	Pask
ENSMUSG00000026421	1828	4938.03	3097.15	-0.67301	1.21e-05	0.00046887	Down	Csrp1
ENSMUSG00000026463	11725	3859.64	1357.39	-1.50788	0.00165347	0.0178234	Down	Atp2b4
ENSMUSG00000026519	3306	1815.41	1180.36	-0.621445	0.00718876	0.0447695	Down	Tmem63a
ENSMUSG00000026576	2580	1310.29	844.628	-0.633923	0.000244068	0.00470259	Down	Atp1b1
ENSMUSG00000026580	3438	11.4819	0	-5.94719	0.000435476	0.00695801	Down	Selp
ENSMUSG00000026605	11130	2060.99	211.379	-3.2865	5.21e-05	0.00149958	Down	Cenpf
ENSMUSG00000026622	3227	433.357	154.6	-1.48467	6.94e-08	6.24e-06	Down	Nek2
ENSMUSG00000026639	4867	1618.57	216.244	-2.90538	4.99e-08	4.67e-06	Down	Lamb3
ENSMUSG00000026683	3888	665.779	53.9641	-3.62923	5.12e-07	3.47e-05	Down	Nuf2
ENSMUSG00000026764	6856	659.157	249.157	-1.40466	0.00739817	0.0454563	Down	Kif5c
ENSMUSG00000026779	5590	540.558	193.234	-1.48576	1.44e-05	0.000533315	Down	Mastl
ENSMUSG00000026837	8406	45247.3	6319.14	-2.84005	0.0061861	0.0405635	Down	Col5a1
ENSMUSG00000026864	3672	22352.7	10476.9	-1.09324	0.00343259	0.0279091	Down	Hspa5
ENSMUSG00000026873	3741	213.415	87.3098	-1.29035	0.000728261	0.00998872	Down	Phf19
ENSMUSG00000026888	2797	335.747	69.6726	-2.27208	0.00245806	0.0228819	Down	Grb14
ENSMUSG00000026980	6901	906.73	238.215	-1.92945	0.00675339	0.0430438	Down	Ly75
ENSMUSG00000027009	9767	1580.13	585.712	-1.43228	0.00122035	0.014624	Down	Itga4
ENSMUSG00000027115	6509	253.147	48.3566	-2.39234	0.000888434	0.0115522	Down	Kif18a
ENSMUSG00000027201	3424	2935	1550.83	-0.920403	0.00232949	0.022198	Down	Myef2
ENSMUSG00000027208	2672	707.532	134.413	-2.39769	0.00528495	0.0370566	Down	Fgf7
ENSMUSG00000027230	2603	4357.38	1156.11	-1.91446	0.000224737	0.00442305	Down	Creb3l1
ENSMUSG00000027238	4230	23.2534	3.07765	-2.93025	0.00182312	0.0188011	Down	Frmd5
ENSMUSG00000027248	2770	27442.6	18070.1	-0.602833	3.19e-05	0.00101588	Down	Pdia3
ENSMUSG00000027249	3167	189.057	90.5614	-1.06204	8.4e-06	0.000353519	Down	F2
ENSMUSG00000027306	3526	628.431	136.353	-2.20674	8.76e-08	7.6e-06	Down	Nusap1
ENSMUSG00000027316	1791	63.2248	9.28186	-2.78532	0.00107057	0.0133284	Down	Gfra4
ENSMUSG00000027326	7800	470.355	77.435	-2.60564	7.53e-05	0.00198888	Down	Knl1
ENSMUSG00000027331	4602	734.025	111.505	-2.72109	2.76e-05	0.000901216	Down	Knstrn
ENSMUSG00000027335	1899	99.4578	3.96021	-4.69052	1.25e-07	1.04e-05	Down	Adra1d
ENSMUSG00000027379	3421	601.644	73.9243	-3.02856	2.68e-12	7.85e-10	Down	Bub1
ENSMUSG00000027399	1974	22.0527	5.01083	-2.13369	0.0037078	0.029315	Down	Il1a
ENSMUSG00000027469	4365	1376.55	435.97	-1.65846	5.62e-18	4.54e-15	Down	Tpx2
ENSMUSG00000027603	2614	151.293	47.2037	-1.68699	4.02e-06	0.000194018	Down	Ggt7
ENSMUSG00000027661	3544	191.727	46.5226	-2.04777	0.0045589	0.0339377	Down	Slc2a10
ENSMUSG00000027699	4086	794.879	128.351	-2.63258	0.000179707	0.00380343	Down	Ect2
ENSMUSG00000027715	2965	1352.5	397.767	-1.76501	6.61e-10	9.99e-08	Down	Ccna2
ENSMUSG00000027776	1303	278.866	107.664	-1.37606	0.0044929	0.0336466	Down	Il12a
ENSMUSG00000027777	2201	1502.9	594.598	-1.33834	0.00477177	0.0347701	Down	Schip1
ENSMUSG00000027800	3372	2583.6	1630.59	-0.664182	9.15e-05	0.00230981	Down	Tm4sf1
ENSMUSG00000027831	6431	7.91401	0	-5.40948	0.00761299	0.0464055	Down	Veph1
ENSMUSG00000027832	1898	44.0087	11.5703	-1.94574	0.0029696	0.025487	Down	Ptx3
ENSMUSG00000027859	1187	76.4835	6.7373	-3.50943	4.47e-08	4.22e-06	Down	Ngf
ENSMUSG00000027901	4050	19.6537	2.07637	-3.26479	0.000330882	0.00579127	Down	Dennd2d
ENSMUSG00000027907	511	11311	6527.78	-0.793124	0.000198056	0.00406059	Down	S100a11
ENSMUSG00000027994	1318	546.287	271.525	-1.01002	0.005041	0.0357838	Down	Mcub
ENSMUSG00000028044	849	438.601	186.943	-1.23173	1.89e-11	4.49e-09	Down	Cks1b
ENSMUSG00000028066	2346	296.666	140.616	-1.07772	5.47e-06	0.000249307	Down	Pmf1
ENSMUSG00000028068	5756	494.931	46.1531	-3.42975	2.46e-13	9.16e-11	Down	Iqgap3
ENSMUSG00000028121	3311	1532.04	685.118	-1.16167	0.000548254	0.00815387	Down	Bcar3
ENSMUSG00000028158	3963	834.341	551.692	-0.596034	0.0026907	0.0240429	Down	Mttp
ENSMUSG00000028175	3323	499.555	50.9657	-3.29755	2.54e-05	0.000850276	Down	Depdc1a
ENSMUSG00000028194	3764	1146	128.784	-3.15499	0.00120687	0.0144877	Down	Ddah1
ENSMUSG00000028195	2019	12084.8	3947.97	-1.61393	1.94e-05	0.000682012	Down	Ccn1
ENSMUSG00000028251	1588	584.552	305.133	-0.938749	3.53e-05	0.00109057	Down	Tstd3
ENSMUSG00000028312	5404	1303.84	431.976	-1.59444	0.00198797	0.0199428	Down	Smc2
ENSMUSG00000028364	7106	19680.3	1339.78	-3.87674	0.00515821	0.0364466	Down	Tnc
ENSMUSG00000028465	8393	19718.2	11354.7	-0.796273	0.00775716	0.0469078	Down	Tln1
ENSMUSG00000028641	3188	1905.87	1214.48	-0.650501	0.00420709	0.0321003	Down	P3h1
ENSMUSG00000028643	832	787.184	523.631	-0.588752	0.0067028	0.0428686	Down	Svbp
ENSMUSG00000028655	2151	189.828	98.6157	-0.945296	7.47e-05	0.00197951	Down	Mfsd2a
ENSMUSG00000028678	2842	364.668	46.6551	-2.97111	0.00011144	0.00268589	Down	Kif2c
ENSMUSG00000028718	5368	168.124	32.2943	-2.3896	1.4e-09	1.88e-07	Down	Stil
ENSMUSG00000028763	14187	36235.5	8075.6	-2.16578	0.00778723	0.0469365	Down	Hspg2
ENSMUSG00000028854	4676	1974.67	1238.34	-0.673046	9.71e-06	0.000394231	Down	Slc9a1
ENSMUSG00000028873	3358	322.603	74.6156	-2.11537	4.07e-10	6.75e-08	Down	Cdca8
ENSMUSG00000028927	4774	653.491	195.711	-1.74104	6.53e-10	9.98e-08	Down	Padi2
ENSMUSG00000028937	1505	1620.88	571.619	-1.50425	0.00308299	0.0259247	Down	Acot7
ENSMUSG00000028980	4745	1979.84	760.075	-1.38165	0.00133597	0.0155568	Down	H6pd
ENSMUSG00000029061	1434	58.4569	13.1882	-2.15626	4.97e-07	3.4e-05	Down	Mmp23
ENSMUSG00000029119	3330	1541.46	597.626	-1.36756	0.00227846	0.0219194	Down	Man2b2
ENSMUSG00000029177	3806	506.895	90.8629	-2.47892	2.22e-17	1.61e-14	Down	Cenpa
ENSMUSG00000029304	1507	59221.4	21765.1	-1.44411	0.00815174	0.0484003	Down	Spp1
ENSMUSG00000029309	2759	20.2782	0.641134	-4.9443	0.000963361	0.0123169	Down	Sparcl1
ENSMUSG00000029344	1835	2972.8	1526.94	-0.961557	6.92e-07	4.51e-05	Down	Tpst2
ENSMUSG00000029381	6765	428.446	167.393	-1.35579	7.66e-09	8.86e-07	Down	Shroom3
ENSMUSG00000029413	2414	473.406	193.531	-1.29257	7.4e-07	4.8e-05	Down	Naaa
ENSMUSG00000029414	6961	435.942	27.1741	-4.00918	2.53e-05	0.000850276	Down	Kntc1
ENSMUSG00000029417	2889	25.4447	0	-7.10205	2.77e-07	2.06e-05	Down	Cxcl9
ENSMUSG00000029436	6422	29.4839	7.40776	-1.99842	0.00512409	0.0362427	Down	Mmp17
ENSMUSG00000029478	8862	6764.75	4218.67	-0.681393	0.000347031	0.00600516	Down	Ncor2
ENSMUSG00000029528	3761	3039.09	1927.29	-0.657147	0.00498923	0.03557	Down	Pxn
ENSMUSG00000029576	3963	160.294	73.103	-1.12816	0.00474121	0.0347361	Down	Radil
ENSMUSG00000029580	1920	42491.5	14944.4	-1.5076	4.68e-15	2.3e-12	Down	Actb
ENSMUSG00000029622	3105	8020.88	3816.9	-1.07146	0.00603915	0.0399234	Down	Arpc1b
ENSMUSG00000029651	7543	18.4758	1.12444	-4.11353	0.00763972	0.0465248	Down	Mtus2
ENSMUSG00000029658	2574	8.39758	0	-5.49658	0.00259077	0.0235436	Down	Wdr95
ENSMUSG00000029674	3473	801.531	498.82	-0.68408	8.98e-06	0.000371081	Down	Limk1
ENSMUSG00000029718	2573	12412.9	3034.81	-2.03226	0.000231185	0.00451763	Down	Pcolce
ENSMUSG00000029804	4731	1405.16	522.967	-1.42656	0.00398188	0.0308961	Down	Herc3
ENSMUSG00000029838	2558	79.3733	7.90573	-3.34096	3.36e-06	0.000166079	Down	Ptn
ENSMUSG00000029851	4497	946.144	284.422	-1.73498	0.00236479	0.0223745	Down	Tcaf2
ENSMUSG00000029859	3273	469.292	88.9928	-2.39831	1.92e-18	1.88e-15	Down	Epha1
ENSMUSG00000029860	3188	16063.4	5120.9	-1.64939	6.11e-07	4.04e-05	Down	Zyx
ENSMUSG00000029910	7557	792.058	361.155	-1.13443	7.27e-08	6.45e-06	Down	Mad2l1
ENSMUSG00000030000	8182	191.626	72.2929	-1.40332	0.000508982	0.00772003	Down	Add2
ENSMUSG00000030123	6907	2845.65	1212.8	-1.2307	0.00396911	0.0308443	Down	Plxnd1
ENSMUSG00000030170	2371	7.93808	0	-5.42194	0.00315536	0.026372	Down	Wnt5b
ENSMUSG00000030187	1799	19.3941	0.9617	-4.29237	0.000680956	0.00949166	Down	Klra2
ENSMUSG00000030205	1348	72.0794	34.8793	-1.04533	0.0015116	0.0168517	Down	Gprc5d
ENSMUSG00000030208	2911	24611.3	8375.63	-1.55502	0.00470731	0.0346117	Down	Emp1
ENSMUSG00000030220	1193	1302.05	557.711	-1.22368	0.00757089	0.0462285	Down	Arhgdib
ENSMUSG00000030342	1228	13070.7	8034.5	-0.702103	0.000607066	0.00876328	Down	Cd9
ENSMUSG00000030346	2233	91.6463	37.9125	-1.27045	0.00213827	0.0208477	Down	Rad51ap1
ENSMUSG00000030530	5736	4747.05	2905.93	-0.708129	1.22e-05	0.000471923	Down	Furin
ENSMUSG00000030539	3949	826.049	497.049	-0.733258	0.00362214	0.0288586	Down	Sema4b
ENSMUSG00000030630	1585	1484.61	886.589	-0.743256	0.000638929	0.00901513	Down	Fah
ENSMUSG00000030652	3070	220.346	144.34	-0.611369	0.00513015	0.0362669	Down	Coq7
ENSMUSG00000030677	3586	335.044	116.6	-1.5205	1.24e-06	7.46e-05	Down	Kif22
ENSMUSG00000030748	5256	3911.54	1502.7	-1.38044	1.17e-09	1.66e-07	Down	Il4ra
ENSMUSG00000030768	4984	1697.27	841.047	-1.01346	0.000397189	0.00653926	Down	Disp1
ENSMUSG00000030782	3788	1612.96	1009.15	-0.676289	0.00572489	0.038835	Down	Tgfb1i1
ENSMUSG00000030867	2199	452.558	56.959	-2.99225	1.83e-20	2.1e-17	Down	Plk1
ENSMUSG00000031004	10061	3795.4	481.017	-2.98083	2.55e-11	5.75e-09	Down	Mki67
ENSMUSG00000031070	2087	1130.74	381.355	-1.56885	0.00468231	0.0345017	Down	Mrgprf
ENSMUSG00000031075	4644	52.7301	11.151	-2.24625	0.000168126	0.00365985	Down	Ano1
ENSMUSG00000031098	1503	199.006	113.012	-0.819285	0.00142427	0.0161531	Down	Syt8
ENSMUSG00000031149	1339	1623.77	865.712	-0.907194	3.09e-10	5.38e-08	Down	Praf2
ENSMUSG00000031167	2792	5222.5	3049.02	-0.776524	1.12e-09	1.62e-07	Down	Rbm3
ENSMUSG00000031169	2622	3198.33	642.996	-2.31489	1.16e-05	0.000454069	Down	Porcn
ENSMUSG00000031209	4743	15.754	0.749627	-4.48741	0.00301212	0.0257058	Down	Heph
ENSMUSG00000031262	3309	337.234	41.9844	-3.00982	0.00113208	0.013819	Down	Cenpi
ENSMUSG00000031304	1670	214.318	73.831	-1.54157	0.000354091	0.0060865	Down	Il2rg
ENSMUSG00000031328	8456	50325.8	17748.5	-1.50362	0.000527121	0.00788217	Down	Flna
ENSMUSG00000031375	2666	128523	38135.9	-1.75281	0.00251421	0.0230886	Down	Bgn
ENSMUSG00000031398	6943	1165.99	570.88	-1.03102	0.000864978	0.0113767	Down	Plxna3
ENSMUSG00000031486	5760	2809.82	707.534	-1.99002	0.000129703	0.00298882	Down	Adgra2
ENSMUSG00000031538	4042	4761.62	3011.07	-0.661162	0.000169831	0.00369093	Down	Plat
ENSMUSG00000031548	4372	6430.37	1332.98	-2.27044	0.00108282	0.0134443	Down	Sfrp1
ENSMUSG00000031629	3010	69.4208	24.8079	-1.48358	0.000282454	0.00518095	Down	Cenpu
ENSMUSG00000031709	5334	390.252	172.654	-1.17813	0.00177734	0.0186068	Down	Tbc1d9
ENSMUSG00000031750	1796	293.957	83.1475	-1.82545	0.000324006	0.00569994	Down	Il34
ENSMUSG00000031756	2497	157.792	48.9301	-1.68788	1.29e-05	0.000487283	Down	Cenpn
ENSMUSG00000031788	3384	4487.94	1248.66	-1.84596	9.59e-05	0.0024022	Down	Kifc3
ENSMUSG00000031799	2158	36391.5	11144.6	-1.70728	0.0042526	0.0323937	Down	Tpm4
ENSMUSG00000031821	3900	382.7	191.477	-0.996697	0.0043654	0.0329804	Down	Gins2
ENSMUSG00000031827	1596	520.651	288.521	-0.850171	0.00752308	0.0460387	Down	Cotl1
ENSMUSG00000031930	4314	2570.89	1425.91	-0.85071	0.000477915	0.00744017	Down	Wwp2
ENSMUSG00000031957	878	333.291	101.447	-1.71584	7.9e-14	3.29e-11	Down	Ctrb1
ENSMUSG00000032014	2526	1740.19	557.425	-1.64315	3.5e-06	0.000172186	Down	Oaf
ENSMUSG00000032047	3405	2064.92	1156.05	-0.837322	0.00262077	0.0236753	Down	Acat1
ENSMUSG00000032059	2873	748.547	213.845	-1.80874	0.00733581	0.0453772	Down	Alg9
ENSMUSG00000032085	1595	6883.72	1750.48	-1.97534	1.22e-16	7.97e-14	Down	Tagln
ENSMUSG00000032115	4925	4599.92	2328.86	-0.982159	0.00315346	0.026372	Down	Hyou1
ENSMUSG00000032177	4653	244.61	51.4903	-2.25235	3.61e-14	1.65e-11	Down	Pde4a
ENSMUSG00000032185	3585	2456.32	1307.15	-0.910368	0.00641428	0.0415699	Down	Carm1
ENSMUSG00000032198	6880	1022.98	538.061	-0.927619	0.00208906	0.0205426	Down	Dock6
ENSMUSG00000032218	1531	583.264	76.4457	-2.9357	1.92e-28	5.28e-25	Down	Ccnb2
ENSMUSG00000032231	2280	22774.7	9406.56	-1.27573	0.00517204	0.0364881	Down	Anxa2
ENSMUSG00000032281	2880	325.552	66.1528	-2.2964	5.15e-10	8.43e-08	Down	Acsbg1
ENSMUSG00000032291	802	8.43078	0	-5.51346	0.00385676	0.0302136	Down	Crabp1
ENSMUSG00000032322	2822	376.214	225.58	-0.737997	7.48e-05	0.00197951	Down	Pstpip1
ENSMUSG00000032327	3077	118.716	57.7878	-1.04376	0.00157711	0.0173108	Down	Stra6
ENSMUSG00000032334	3297	8303.79	1717.51	-2.27357	0.00545263	0.0377256	Down	Loxl1
ENSMUSG00000032353	1579	2362.74	1153.17	-1.03531	6.22e-10	9.72e-08	Down	Tmed3
ENSMUSG00000032366	2890	34959.4	17890.3	-0.966529	1.5e-06	8.68e-05	Down	Tpm1
ENSMUSG00000032373	3716	54.167	6.00234	-3.16559	2.9e-07	2.12e-05	Down	Car12
ENSMUSG00000032392	2518	308.937	180.092	-0.780478	0.000735777	0.0100818	Down	Parp16
ENSMUSG00000032400	2957	345.259	76.4893	-2.17843	3.65e-09	4.45e-07	Down	Zwilch
ENSMUSG00000032431	1674	3023.12	1681.83	-0.84625	0.00237741	0.0224308	Down	Crtap
ENSMUSG00000032531	4427	8150.21	5103.08	-0.675382	0.00505178	0.0358234	Down	Amotl2
ENSMUSG00000032562	2215	12922.8	8185.11	-0.658904	0.00585501	0.0393106	Down	Gnai2
ENSMUSG00000032575	2247	3019.55	1587.42	-0.927846	4.3e-08	4.08e-06	Down	Manf
ENSMUSG00000032586	3680	97.188	32.7185	-1.57827	0.000221619	0.00439405	Down	Traip
ENSMUSG00000032643	1664	782.006	471.208	-0.730312	0.000681672	0.00949166	Down	Fhl3
ENSMUSG00000032783	2639	278.95	25.4041	-3.46675	5.41e-10	8.66e-08	Down	Troap
ENSMUSG00000032812	5147	1351.8	883.188	-0.613636	0.000353854	0.0060865	Down	Arap1
ENSMUSG00000032815	4485	99.8723	43.2146	-1.20333	0.000104052	0.00256356	Down	Fanca
ENSMUSG00000032867	5000	3816.62	1683.44	-1.18109	0.00502007	0.0357192	Down	Fbxw8
ENSMUSG00000032875	10190	5497.59	3644.56	-0.593129	0.00131658	0.0154252	Down	Arhgef17
ENSMUSG00000032911	8121	2525.94	714.056	-1.82318	3.23e-05	0.00102633	Down	Cspg4
ENSMUSG00000033016	4797	801.132	496.196	-0.691952	0.0054003	0.0375022	Down	Nfatc1
ENSMUSG00000033031	3977	827.641	168.211	-2.3002	0.00147313	0.016544	Down	Cip2a
ENSMUSG00000033256	1566	670.483	398.991	-0.748347	0.00104502	0.0130842	Down	Shf
ENSMUSG00000033510	3483	88.9239	37.2176	-1.25589	0.00524159	0.0368465	Down	Otud7a
ENSMUSG00000033545	5466	416.988	255.342	-0.706237	0.00467743	0.0344841	Down	Znrf1
ENSMUSG00000033684	3395	6801.96	3767.74	-0.852398	1.93e-05	0.000681794	Down	Qsox1
ENSMUSG00000033952	9867	979.542	342.279	-1.51591	2.19e-15	1.16e-12	Down	Aspm
ENSMUSG00000034023	5512	183.597	4.49776	-5.37511	0.000139128	0.0031242	Down	Fancd2
ENSMUSG00000034118	2050	899.787	456.675	-0.979415	0.00158468	0.017357	Down	Tpst1
ENSMUSG00000034165	3858	5025.96	3008.16	-0.740433	2.13e-05	0.00073742	Down	Ccnd3
ENSMUSG00000034205	5316	820.091	188.23	-2.12453	0.00632038	0.0412083	Down	Loxl2
ENSMUSG00000034206	8628	173.16	29.7837	-2.54597	0.00264387	0.0237724	Down	Polq
ENSMUSG00000034220	4176	39325.8	14440.2	-1.44541	0.000712446	0.00982076	Down	Gpc1
ENSMUSG00000034311	4983	550.65	47.8929	-3.52769	2.23e-05	0.000765034	Down	Kif4
ENSMUSG00000034401	2466	940.233	469.745	-1.00209	0.00588291	0.0394017	Down	Spata6
ENSMUSG00000034413	6195	99.7863	22.1054	-2.16622	0.00138214	0.0159114	Down	Neurl1b
ENSMUSG00000034555	3996	237.158	50.1724	-2.246	2.95e-06	0.000152727	Down	Tex16
ENSMUSG00000034684	3395	1118.09	364.335	-1.61894	1.96e-10	3.62e-08	Down	Sema3f
ENSMUSG00000034771	4388	519.957	274.521	-0.922994	7.42e-05	0.00197858	Down	Tle2
ENSMUSG00000034842	1815	44.7058	17.1142	-1.37999	0.0079885	0.0476366	Down	Art3
ENSMUSG00000034863	4927	2290.97	1422.5	-0.687302	5.63e-06	0.000252244	Down	Ano8
ENSMUSG00000034906	2695	464.765	129.174	-1.8497	1.1e-09	1.6e-07	Down	Ncaph
ENSMUSG00000034932	604	289.147	156.178	-0.887307	0.000146374	0.00326365	Down	Mrpl54
ENSMUSG00000034997	5606	57.7616	14.4701	-2.01016	0.00422872	0.0322475	Down	Htr2a
ENSMUSG00000035273	3117	113.754	31.796	-1.84673	0.00602394	0.0398995	Down	Hpse
ENSMUSG00000035279	4348	2056.6	677.251	-1.60301	0.00052938	0.00790736	Down	Ssc5d
ENSMUSG00000035390	2996	553.267	327.389	-0.758037	0.00831883	0.0490326	Down	Brsk1
ENSMUSG00000035455	2974	263.683	106.479	-1.30663	0.00146006	0.016464	Down	Fignl1
ENSMUSG00000035615	5241	2383.79	1468.74	-0.698977	0.00677545	0.0431128	Down	Frmpd1
ENSMUSG00000035671	4625	2324.13	958.045	-1.27888	0.00477435	0.0347701	Down	Zswim4
ENSMUSG00000035683	2955	206.154	14.2331	-3.86339	0.000505264	0.00768906	Down	Melk
ENSMUSG00000035735	5634	497.878	135.052	-1.88513	6.61e-09	7.81e-07	Down	Dagla
ENSMUSG00000035783	2035	53788.1	9199.59	-2.54767	7.08e-05	0.00190223	Down	Acta2
ENSMUSG00000035914	3603	1979.65	1035.42	-0.935522	0.000426454	0.00688142	Down	Cd276
ENSMUSG00000035929	2596	331.613	200.545	-0.728177	0.00566525	0.0386941	Down	H2-Q4
ENSMUSG00000036106	1830	249.41	97.1752	-1.36394	2.17e-07	1.64e-05	Down	Prr5
ENSMUSG00000036206	4995	2434.14	1044.38	-1.22112	0.00260586	0.0236384	Down	Sh3bp4
ENSMUSG00000036223	2630	109.716	21.6373	-2.33436	0.00021099	0.00426225	Down	Ska1
ENSMUSG00000036256	1200	10237.1	2924.8	-1.80751	0.00018482	0.00388178	Down	Igfbp7
ENSMUSG00000036306	5019	553.744	271.446	-1.03005	1.11e-05	0.000439739	Down	Lzts1
ENSMUSG00000036504	937	234.308	106.057	-1.1472	0.00172491	0.0183299	Down	Phpt1
ENSMUSG00000036565	4658	971.627	621.469	-0.645212	0.00690511	0.0436953	Down	Ttyh3
ENSMUSG00000036599	2331	986.067	293.171	-1.75093	0.00152277	0.0169444	Down	Chst12
ENSMUSG00000036745	7394	1613.4	656.444	-1.29784	0.000869169	0.0114204	Down	Ttll7
ENSMUSG00000036768	4858	344.97	91.3897	-1.91665	1.6e-15	8.78e-13	Down	Kif15
ENSMUSG00000036777	4605	3397.64	313.506	-3.43855	0.000459799	0.00724565	Down	Anln
ENSMUSG00000036855	2661	103.082	38.2179	-1.43444	3.59e-05	0.00110423	Down	Gjd4
ENSMUSG00000036864	2466	142.525	80.2983	-0.827464	0.00599489	0.0398029	Down	Proser3
ENSMUSG00000036968	1855	1360.78	779.004	-0.805305	0.000551502	0.00819332	Down	Cnpy4
ENSMUSG00000037010	3149	105.824	29.4248	-1.83926	2.96e-06	0.000152727	Down	Apln
ENSMUSG00000037020	4768	222.494	80.1637	-1.47665	0.00613928	0.0403526	Down	Wdr62
ENSMUSG00000037217	3261	498.308	250.812	-0.990452	0.00227641	0.0219151	Down	Syn1
ENSMUSG00000037280	3798	231.202	126.567	-0.867317	0.00475707	0.034747	Down	Galnt6
ENSMUSG00000037313	2899	578.598	174.853	-1.72779	1.37e-08	1.49e-06	Down	Tacc3
ENSMUSG00000037411	3011	3415.74	1137.03	-1.5867	0.00156933	0.0172521	Down	Serpine1
ENSMUSG00000037474	4693	290.404	146.164	-0.992518	6.57e-05	0.00178974	Down	Dtl
ENSMUSG00000037544	4414	590.303	82.1739	-2.84715	0.0013902	0.0159508	Down	Dlgap5
ENSMUSG00000037552	5511	1295.52	605.335	-1.09851	8.97e-06	0.000371081	Down	Plekhg2
ENSMUSG00000037624	3572	190.263	65.6011	-1.53925	4.75e-07	3.29e-05	Down	Kcnk2
ENSMUSG00000037628	1952	86.2909	16.4331	-2.40423	0.00387844	0.0302986	Down	Cdkn3
ENSMUSG00000037669	3496	2143.45	584.474	-1.87508	1.85e-25	3.63e-22	Down	Ldah
ENSMUSG00000037736	7498	241.795	133.025	-0.864872	0.00554175	0.0381571	Down	Limch1
ENSMUSG00000037846	4432	174.671	81.3734	-1.10329	2.36e-06	0.000128696	Down	Rtkn2
ENSMUSG00000037936	3093	653.883	368.277	-0.82959	0.000298307	0.00537852	Down	Scarb1
ENSMUSG00000037940	8067	1442.96	740.99	-0.962049	0.00497077	0.0355236	Down	Inpp4b
ENSMUSG00000038034	2866	2173.18	1217.76	-0.835384	1.35e-05	0.000503622	Down	Igsf8
ENSMUSG00000038059	5022	1025.94	638.767	-0.682596	0.000795541	0.0106915	Down	Smim3
ENSMUSG00000038146	8016	3370.92	2232.03	-0.594748	1.97e-05	0.000688383	Down	Notch3
ENSMUSG00000038252	4629	963.513	426.956	-1.17367	1.41e-07	1.15e-05	Down	Ncapd2
ENSMUSG00000038264	3297	2798.45	412.707	-2.76196	0.000914264	0.011821	Down	Sema7a
ENSMUSG00000038319	4221	198.044	34.1187	-2.54321	0.00205849	0.0203816	Down	Kcnh2
ENSMUSG00000038342	7303	1466.43	828.865	-0.823419	5.36e-07	3.56e-05	Down	Mlxip
ENSMUSG00000038379	2871	394.734	50.0844	-2.98399	1.49e-13	6.04e-11	Down	Ttk
ENSMUSG00000038418	4484	3990.53	1734.18	-1.20204	1.83e-09	2.4e-07	Down	Egr1
ENSMUSG00000038422	1205	330.357	188.078	-0.814668	0.00282205	0.0246339	Down	Hdhd3
ENSMUSG00000038502	2932	1642.89	954.02	-0.784109	1.35e-08	1.47e-06	Down	Ptov1
ENSMUSG00000038591	4587	110.652	8.88703	-3.65127	0.00496527	0.0355027	Down	Colec10
ENSMUSG00000038763	6369	675.777	416.299	-0.697854	0.00222442	0.0215048	Down	Alpk3
ENSMUSG00000038803	1144	1920.27	1089.35	-0.818439	1.48e-05	0.00054582	Down	Ost4
ENSMUSG00000038886	6554	4041.95	1834.83	-1.13964	2.51e-09	3.17e-07	Down	Man2a2
ENSMUSG00000038916	4105	225.246	120.292	-0.906435	5.82e-05	0.00162165	Down	Soga3
ENSMUSG00000038943	3645	1254.67	496.335	-1.3385	5.79e-11	1.16e-08	Down	Prc1
ENSMUSG00000039070	2739	37.5816	7.69366	-2.30697	0.0030461	0.0258037	Down	Cpa4
ENSMUSG00000039167	4106	22.6575	0	-6.9311	1.98e-06	0.000111977	Down	Adgrl4
ENSMUSG00000039187	4645	134.953	14.1993	-3.25727	2.69e-17	1.85e-14	Down	Fanci
ENSMUSG00000039239	5116	4097.32	966.111	-2.08466	0.00594078	0.0396137	Down	Tgfb2
ENSMUSG00000039323	1307	2733.53	317.394	-3.10746	3.92e-10	6.57e-08	Down	Igfbp2
ENSMUSG00000039396	3085	183.757	16.6011	-3.47843	2.92e-22	4.47e-19	Down	Neil3
ENSMUSG00000039474	3787	3175.47	1778.03	-0.836924	0.000936272	0.0120489	Down	Wfs1
ENSMUSG00000039476	1441	1985.7	686.17	-1.5337	8.96e-08	7.7e-06	Down	Prrx2
ENSMUSG00000039787	2715	1549.42	862.081	-0.846186	1.13e-07	9.57e-06	Down	Cercam
ENSMUSG00000039903	2142	349.564	224.839	-0.637775	0.0061973	0.0405982	Down	Eva1c
ENSMUSG00000040084	3668	768.573	95.3834	-3.01397	3.62e-12	1.02e-09	Down	Bub1b
ENSMUSG00000040086	3034	8.91107	0	-5.59221	0.00159165	0.0174195	Down	Tnni3k
ENSMUSG00000040152	5848	359453	33475.9	-3.4246	0.00019365	0.00402423	Down	Thbs1
ENSMUSG00000040269	783	255.847	53.8757	-2.25144	0.00592632	0.0395577	Down	Mrps28
ENSMUSG00000040390	3682	1009.37	645.056	-0.645249	0.00430952	0.0326865	Down	Map3k10
ENSMUSG00000040428	2660	92.3062	17.429	-2.41103	0.00484543	0.0350589	Down	Plekha4
ENSMUSG00000040451	4036	897.787	494.331	-0.861885	0.00724814	0.045078	Down	Sgms1
ENSMUSG00000040488	5386	1568.57	395.667	-1.98781	0.000755332	0.0102882	Down	Ltbp4
ENSMUSG00000040563	2626	514.745	242.567	-1.08388	0.000359157	0.00612371	Down	Plppr2
ENSMUSG00000040690	5206	1434.69	229.112	-2.64747	0.00386175	0.0302136	Down	Col16a1
ENSMUSG00000040701	3031	203.922	130.309	-0.644264	0.00524533	0.0368539	Down	Ap1g2
ENSMUSG00000040714	1901	133.559	70.0254	-0.926799	0.00275316	0.0243884	Down	Klc3
ENSMUSG00000040717	8280	757.305	215.285	-1.81479	0.0011404	0.0138959	Down	Il17rd
ENSMUSG00000040752	6113	200.692	67.6183	-1.56493	3.12e-09	3.9e-07	Down	Myh6
ENSMUSG00000040841	3007	298.347	103.215	-1.53444	0.00338169	0.0276258	Down	Six5
ENSMUSG00000040913	2068	734.407	410.39	-0.840812	0.00436923	0.0329899	Down	Fbxw4
ENSMUSG00000040936	4629	62.4915	6.1006	-3.37685	0.00120418	0.0144736	Down	Ulk4
ENSMUSG00000041064	3897	115.952	26.1697	-2.13958	0.000714961	0.00984556	Down	Pif1
ENSMUSG00000041084	1720	2938.77	1580.24	-0.895247	2.75e-11	6.1e-09	Down	Ostc
ENSMUSG00000041324	6390	9016.43	1551.87	-2.53874	3.18e-06	0.000159805	Down	Inhba
ENSMUSG00000041431	2489	630.395	258.064	-1.28734	0.00022355	0.0044123	Down	Ccnb1
ENSMUSG00000041477	4209	89.0408	26.9732	-1.72886	0.00646018	0.0417243	Down	Dcp1b
ENSMUSG00000041498	8943	337.056	20.5165	-4.0434	0.00172813	0.0183299	Down	Kif14
ENSMUSG00000041559	3120	108.799	17.3801	-2.65632	2.47e-09	3.15e-07	Down	Fmod
ENSMUSG00000041577	3615	3419.79	517.003	-2.72629	1.04e-08	1.16e-06	Down	Prelp
ENSMUSG00000041605	2988	638.217	417.205	-0.612265	0.000237412	0.0046066	Down	Inava
ENSMUSG00000041842	5918	198.582	79.6327	-1.31468	3.27e-05	0.00103	Down	Fhdc1
ENSMUSG00000041886	6937	787.512	89.9618	-3.13235	0.00011335	0.00271666	Down	Macc1
ENSMUSG00000041936	8612	2127.82	1184.68	-0.845193	0.000569148	0.00838656	Down	Agrn
ENSMUSG00000041957	2931	525.108	277.743	-0.917802	0.000174355	0.00371876	Down	Pkp2
ENSMUSG00000041959	685	7973.77	5260.38	-0.600219	0.00147316	0.016544	Down	S100a10
ENSMUSG00000042115	4269	1886.37	753.656	-1.32421	2.76e-06	0.000143988	Down	Klhdc8a
ENSMUSG00000042129	6460	132.293	40.4624	-1.71211	3.59e-08	3.53e-06	Down	Rassf4
ENSMUSG00000042292	4392	2283.93	842.367	-1.4394	0.00361336	0.0288168	Down	Mrtfa
ENSMUSG00000042363	3362	937.484	380.483	-1.3018	2.09e-08	2.17e-06	Down	Lgalsl
ENSMUSG00000042367	1880	161.065	33.9181	-2.2459	1.94e-08	2.04e-06	Down	Gjb3
ENSMUSG00000042489	5027	267.425	57.9305	-2.21194	1.13e-10	2.13e-08	Down	Clspn
ENSMUSG00000042821	1621	1409.35	318.75	-2.14538	1.15e-29	3.95e-26	Down	Snai1
ENSMUSG00000042826	3039	796.049	515.536	-0.627543	0.00135761	0.0157078	Down	Fgf11
ENSMUSG00000042942	8420	80.1481	17.5082	-2.20662	0.00581973	0.0392269	Down	Greb1l
ENSMUSG00000042961	4778	6.88077	0	-5.21746	0.00438689	0.0330506	Down	Egflam
ENSMUSG00000043017	3305	210.66	84.5777	-1.31938	0.000257517	0.00489776	Down	Ptgir
ENSMUSG00000043091	1982	8849.86	4186.9	-1.07974	7.77e-20	8.22e-17	Down	Tuba1c
ENSMUSG00000043557	8425	220.63	84.2186	-1.39272	1.09e-06	6.69e-05	Down	Mdga1
ENSMUSG00000043760	12935	466.477	180.813	-1.36859	0.00390742	0.030473	Down	Pkhd1
ENSMUSG00000043850	3083	77.882	19.4169	-2.01499	0.00302316	0.0257078	Down	Clrn1
ENSMUSG00000044017	5163	696.581	274.059	-1.34719	5.34e-06	0.000248037	Down	Adgrd1
ENSMUSG00000044201	2634	143.765	28.2853	-2.34891	2.34e-06	0.000128696	Down	Cdc25c
ENSMUSG00000044288	5807	422.843	246.706	-0.775816	0.000314498	0.00559709	Down	Cnr1
ENSMUSG00000044646	4572	614.33	204.522	-1.58787	3.65e-05	0.00111554	Down	Zbtb7c
ENSMUSG00000044674	4197	11151.1	4889.72	-1.18942	0.00627606	0.0409776	Down	Fzd1
ENSMUSG00000044716	2779	547.329	226.102	-1.27542	7.6e-05	0.00199665	Down	Dok7
ENSMUSG00000044813	2244	771.688	286.151	-1.43246	0.00239418	0.0225283	Down	Shb
ENSMUSG00000045136	2182	9179.56	3671.53	-1.32214	0.0026955	0.0240556	Down	Tubb2b
ENSMUSG00000045165	1932	1368.38	739.026	-0.88947	8.53e-06	0.000357561	Down	AI467606
ENSMUSG00000045328	7910	1384.44	207.094	-2.74213	0.000166293	0.00363904	Down	Cenpe
ENSMUSG00000045348	4565	358.563	205.604	-0.803128	0.00069414	0.00960693	Down	Nyap1
ENSMUSG00000045672	7612	202.968	37.1665	-2.45541	0.000354386	0.0060865	Down	Col27a1
ENSMUSG00000045751	4478	177.809	63.82	-1.48379	9.17e-05	0.00230988	Down	Mms22l
ENSMUSG00000045763	1855	7878.39	3536.91	-1.15554	0.000112478	0.00270516	Down	Basp1
ENSMUSG00000045777	3412	146.737	61.1482	-1.25823	0.00491942	0.0353587	Down	Ifitm10
ENSMUSG00000045903	3791	15.0239	0.9617	-3.927	0.00410695	0.0315639	Down	Npas4
ENSMUSG00000046179	3691	934.027	468.124	-0.997053	3.49e-06	0.000172186	Down	E2f8
ENSMUSG00000046186	5860	1750.14	834.154	-1.06949	0.00534287	0.0372916	Down	Cd109
ENSMUSG00000046417	1984	456.893	156.667	-1.54596	0.0017713	0.0186068	Down	Lrrc75a
ENSMUSG00000046589	3878	165.695	95.6172	-0.789617	0.00228822	0.0219672	Down	Lrrc8e
ENSMUSG00000046591	7199	118.376	35.1447	-1.75133	0.00084786	0.0112046	Down	Ticrr
ENSMUSG00000046814	645	398.113	256.308	-0.635805	0.00280757	0.0245484	Down	Gchfr
ENSMUSG00000046841	3089	8032.45	3044.09	-1.39999	5.32e-08	4.91e-06	Down	Ckap4
ENSMUSG00000047261	1420	427.882	49.526	-3.11632	1.2e-06	7.21e-05	Down	Gap43
ENSMUSG00000047443	2815	1111.25	187.138	-2.57161	2.96e-07	2.16e-05	Down	Erfe
ENSMUSG00000047534	5016	375.663	59.2516	-2.66825	0.000427181	0.00688142	Down	Mis18bp1
ENSMUSG00000047728	1498	190.36	63.6964	-1.58311	0.00178376	0.0186123	Down	Ly6g2
ENSMUSG00000047759	3939	158.146	69.3679	-1.19298	0.00257302	0.0234572	Down	Hs3st3a1
ENSMUSG00000047842	4786	44.6154	7.0134	-2.66304	8.55e-07	5.42e-05	Down	Diras2
ENSMUSG00000047878	2092	1821.95	880.195	-1.05003	8.77e-10	1.31e-07	Down	A4galt
ENSMUSG00000047986	2452	204.473	113.535	-0.849913	0.000147154	0.00327044	Down	Palm3
ENSMUSG00000048096	3948	272.13	138.654	-0.972308	0.0053537	0.0373105	Down	Lmod1
ENSMUSG00000048126	10106	14393.2	1271.94	-3.50043	0.000131406	0.00301292	Down	Col6a3
ENSMUSG00000048240	3433	122.495	46.8645	-1.38546	8.4e-06	0.000353519	Down	Gng7
ENSMUSG00000048285	4662	5550.56	2691.28	-1.04449	0.000545024	0.0081146	Down	Frmd6
ENSMUSG00000048327	3137	940.818	143.109	-2.71891	1.2e-09	1.68e-07	Down	Ckap2l
ENSMUSG00000048387	2012	268.358	59.0207	-2.19064	1.93e-11	4.49e-09	Down	Osr1
ENSMUSG00000048489	1339	272.874	116.909	-1.22046	2.71e-08	2.76e-06	Down	Depp1
ENSMUSG00000048521	1907	40.9846	18.3867	-1.15231	0.00758937	0.0463207	Down	Cxcr6
ENSMUSG00000048922	3841	235.567	57.8319	-2.03184	8.05e-06	0.000343	Down	Cdca2
ENSMUSG00000049044	4181	34.6751	6.535	-2.42039	0.00262514	0.0236814	Down	Rapgef4
ENSMUSG00000049097	2583	90.1592	30.4305	-1.5625	4.18e-05	0.00125093	Down	Ankrd34a
ENSMUSG00000049122	4136	6.16223	0	-5.0534	0.0064276	0.0415919	Down	Frmd3
ENSMUSG00000049307	4074	62.4432	15.5607	-1.992	0.00202813	0.0201976	Down	Fut4
ENSMUSG00000049420	4115	202.763	33.0636	-2.62446	2.24e-05	0.00076637	Down	Tmem200a
ENSMUSG00000049521	2560	3153.05	1686.65	-0.902757	2.51e-12	7.5e-10	Down	Cdc42ep1
ENSMUSG00000049555	2802	140.59	46.6951	-1.59442	0.00562377	0.038529	Down	Tmie
ENSMUSG00000049641	1650	472.439	89.485	-2.40421	3.4e-11	7.31e-09	Down	Vgll2
ENSMUSG00000049775	864	25354	10655.2	-1.2507	0.00147445	0.0165448	Down	Tmsb4x
ENSMUSG00000050014	2325	435.874	180.4	-1.27226	1.41e-05	0.000523816	Down	Apol10b
ENSMUSG00000050069	3745	338.346	25.5073	-3.73335	0.00791833	0.0474031	Down	Grem2
ENSMUSG00000050138	1972	28.5161	5.22781	-2.4679	0.00160597	0.0174651	Down	Kcnk12
ENSMUSG00000050164	2189	95.7651	6.1006	-3.99366	6.05e-05	0.00167406	Down	Mchr1
ENSMUSG00000050212	1689	120.093	30.9236	-1.96552	6.17e-07	4.06e-05	Down	Eva1b
ENSMUSG00000050272	8737	19.2681	0	-6.69737	8.04e-06	0.000343	Down	Dscam
ENSMUSG00000050288	3663	3487.07	2144.22	-0.701826	5.82e-05	0.00162165	Down	Fzd2
ENSMUSG00000050390	5187	3432.22	2267.99	-0.597981	0.000359425	0.00612371	Down	C77080
ENSMUSG00000050410	1732	209.632	83.1198	-1.33184	0.00277592	0.0244217	Down	Tcf19
ENSMUSG00000050663	5714	6.61659	0	-5.16027	0.00547818	0.037833	Down	Trhde
ENSMUSG00000050908	3315	200.71	59.0106	-1.77028	0.00150349	0.0167977	Down	Tvp23a
ENSMUSG00000051048	2403	617.711	77.8882	-2.99012	0.000464728	0.00730658	Down	P4ha3
ENSMUSG00000051235	5268	251.702	52.54	-2.26638	2.3e-10	4.16e-08	Down	Gen1
ENSMUSG00000051279	3532	29.8575	4.35503	-2.77105	0.000978994	0.0124589	Down	Gdf6
ENSMUSG00000051323	10289	2791.54	833.186	-1.74463	0.00726681	0.0451534	Down	Pcdh19
ENSMUSG00000051339	10238	3064.09	993.651	-1.62479	0.00381092	0.0299925	Down	2900026A02Rik
ENSMUSG00000052040	6396	2967.82	1235.31	-1.26483	0.00321224	0.0267014	Down	Klf13
ENSMUSG00000052374	3013	661.175	243.475	-1.44011	7.84e-12	2.03e-09	Down	Actn2
ENSMUSG00000053062	4370	7331.39	4791.1	-0.613795	0.00708228	0.0443668	Down	Jam2
ENSMUSG00000053093	6230	1246.53	422.62	-1.55945	1.82e-12	5.69e-10	Down	Myh7
ENSMUSG00000053128	2833	1130.67	674.285	-0.745622	0.000581911	0.00847127	Down	Rnf26
ENSMUSG00000053137	2615	373.824	234.494	-0.6712	0.00685001	0.0434266	Down	Mapk11
ENSMUSG00000053199	7161	16.6628	0.9617	-4.07293	0.00233001	0.022198	Down	Arhgap20
ENSMUSG00000053317	723	911.04	428.536	-1.08733	5.27e-08	4.9e-06	Down	Sec61b
ENSMUSG00000053647	2537	577.182	246.951	-1.22409	2.03e-09	2.61e-07	Down	Gper1
ENSMUSG00000054196	1166	110.115	16.8235	-2.71243	7.8e-07	5.02e-05	Down	Cthrc1
ENSMUSG00000054215	637	6.34268	0	-5.09847	0.00652552	0.041969	Down	Sprr2k
ENSMUSG00000054474	2077	20.615	3.52137	-2.58738	0.00253557	0.0231927	Down	Thnsl2
ENSMUSG00000054675	2242	2903.33	851.26	-1.77041	0.000168135	0.00365985	Down	Tmem119
ENSMUSG00000055053	6237	10434.8	6780.15	-0.621948	0.000138223	0.00312018	Down	Nfic
ENSMUSG00000055407	4920	2334.16	893.932	-1.38492	0.000280104	0.00515849	Down	Map6
ENSMUSG00000055866	5833	570.985	234.998	-1.28212	0.00498247	0.0355518	Down	Per2
ENSMUSG00000056174	4332	583.722	40.2335	-3.86281	0.000222363	0.00440151	Down	Col8a2
ENSMUSG00000056296	4289	54.9798	1.87407	-4.94626	2.74e-05	0.000894682	Down	Synpr
ENSMUSG00000056328	6081	8488.51	3615.14	-1.23158	8.04e-05	0.00207739	Down	Myh1
ENSMUSG00000056394	3205	757.871	256.573	-1.56379	0.00536373	0.0373121	Down	Lig1
ENSMUSG00000056481	2605	981.313	130.342	-2.91495	5.54e-27	1.27e-23	Down	Cd248
ENSMUSG00000056486	4050	693.777	338.173	-1.03767	0.00364045	0.0289322	Down	Chn1
ENSMUSG00000056531	5336	156.297	25.0636	-2.64876	0.00104525	0.0130842	Down	Ccdc18
ENSMUSG00000056629	1526	687.993	448.9	-0.616988	0.000594335	0.0086152	Down	Fkbp2
ENSMUSG00000056632	6212	169.643	49.0182	-1.79632	0.00064454	0.00907094	Down	Dsg3
ENSMUSG00000057058	2095	24.6476	5.06507	-2.28364	0.000690898	0.00958134	Down	Skap1
ENSMUSG00000057230	19341	3926.63	560.325	-2.80925	5.37e-05	0.00153059	Down	Aak1
ENSMUSG00000057337	6108	810.676	277.448	-1.54808	4.36e-05	0.00129084	Down	Chst3
ENSMUSG00000057604	1730	1028.38	292.111	-1.8168	0.00178305	0.0186123	Down	Lmcd1
ENSMUSG00000057726	1927	393.474	64.0793	-2.62142	0.00177813	0.0186068	Down	Serpinb9g
ENSMUSG00000057751	6851	26.3742	1.90385	-3.75598	0.00101183	0.0127821	Down	Megf6
ENSMUSG00000057948	4046	453.886	217.673	-1.06135	5.21e-07	3.51e-05	Down	Unc13d
ENSMUSG00000057969	3433	2975.2	1871.89	-0.668636	0.00217748	0.0211621	Down	Sema3b
ENSMUSG00000058290	6658	349.165	58.2813	-2.58345	3.88e-25	6.67e-22	Down	Espl1
ENSMUSG00000058672	1610	7755	3523.19	-1.13838	7.99e-07	5.09e-05	Down	Tubb2a
ENSMUSG00000059146	19703	19.2538	1.39076	-3.81252	0.00322856	0.0267531	Down	E430016F16Rik
ENSMUSG00000059430	1333	1414.05	191.052	-2.88933	4.97e-07	3.4e-05	Down	Actg2
ENSMUSG00000059555	3255	1120.76	605.662	-0.88818	5.2e-06	0.000243623	Down	Tor4a
ENSMUSG00000059645	2995	305.931	128.295	-1.25701	0.000738199	0.0101049	Down	Gm7361
ENSMUSG00000059714	1825	2915.87	1556.97	-0.905492	0.000608965	0.00878148	Down	Flot1
ENSMUSG00000059824	1837	745.888	491.646	-0.601609	0.00019664	0.00405137	Down	Dbp
ENSMUSG00000059854	15783	6.66199	0	-5.16353	0.00771116	0.0468118	Down	Hydin
ENSMUSG00000059901	5188	1848.18	476.462	-1.95635	0.00012051	0.00282281	Down	Adamts14
ENSMUSG00000060063	1251	265.572	27.7464	-3.26525	0.000924881	0.0119246	Down	Alox5ap
ENSMUSG00000060470	3034	195.789	60.1998	-1.69898	1.93e-08	2.04e-06	Down	Adgrg3
ENSMUSG00000060538	1118	268.928	140.879	-0.932379	0.00277056	0.0244217	Down	Tmem219
ENSMUSG00000060703	1354	393.823	240.345	-0.713726	0.00760416	0.0463904	Down	Cd302
ENSMUSG00000061825	1970	59.9075	5.32162	-3.48532	2.22e-11	5.1e-09	Down	Ces2c
ENSMUSG00000061878	4063	1419.1	659.65	-1.10476	7.84e-06	0.00033585	Down	Sphk1
ENSMUSG00000062151	8796	55.5978	18.6779	-1.56615	0.00139506	0.0159666	Down	Unc13c
ENSMUSG00000062300	2735	892.869	429.747	-1.056	7.71e-06	0.000332473	Down	Nectin2
ENSMUSG00000062510	4879	130.193	38.8791	-1.74127	3.34e-08	3.3e-06	Down	Nsl1
ENSMUSG00000062661	4653	2278.76	1430.87	-0.671702	0.00576136	0.0389542	Down	Ncs1
ENSMUSG00000062694	1157	615.228	308.899	-0.994934	0.00155821	0.0171903	Down	Cav3
ENSMUSG00000062825	1952	45162	14472.1	-1.64187	1.67e-07	1.32e-05	Down	Actg1
ENSMUSG00000063011	2165	6266.92	2824.43	-1.14993	7.2e-05	0.0019267	Down	Msln
ENSMUSG00000063146	4994	1648.42	974.386	-0.758979	0.00674779	0.0430363	Down	Clip2
ENSMUSG00000063160	8511	1475.29	835.85	-0.820207	0.00150724	0.0168168	Down	Numbl
ENSMUSG00000063605	2304	2650.64	977.258	-1.4399	0.00165778	0.0178311	Down	Ccdc102a
ENSMUSG00000063727	2818	363.17	45.0279	-3.01554	0.00207934	0.0205181	Down	Tnfrsf11b
ENSMUSG00000063838	1025	415.99	169.814	-1.29403	5.88e-12	1.59e-09	Down	Cdc42ep5
ENSMUSG00000063897	2173	304.941	126.712	-1.27046	5.34e-07	3.56e-05	Down	Dhrsx
ENSMUSG00000064310	2697	10.2255	0	-5.79193	0.00392911	0.0306075	Down	Zpld1
ENSMUSG00000066607	2139	2262.99	1457.94	-0.63464	0.00307857	0.0259192	Down	Insyn1
ENSMUSG00000066721	2741	15.2978	0	-6.36535	3.8e-05	0.00114651	Down	Zfp575
ENSMUSG00000067001	1887	123.909	32.9253	-1.9193	0.00126851	0.0150699	Down	Serpinb7
ENSMUSG00000067818	1128	947.587	234.126	-2.01583	1.94e-12	5.92e-10	Down	Myl9
ENSMUSG00000068101	1202	96.5423	18.8153	-2.37099	2.1e-07	1.59e-05	Down	Cenpm
ENSMUSG00000068220	800	49086.2	25582.1	-0.940201	7.01e-09	8.17e-07	Down	Lgals1
ENSMUSG00000068227	4194	150.026	51.347	-1.54303	1.02e-05	0.000409106	Down	Il2rb
ENSMUSG00000068566	4028	14315.5	8442.79	-0.761839	0.000627587	0.00890074	Down	Myadm
ENSMUSG00000068614	1473	6520.63	2510.78	-1.37681	2.15e-16	1.34e-13	Down	Actc1
ENSMUSG00000069793	5769	182.382	79.8141	-1.19199	0.000114769	0.00273636	Down	Slfn9
ENSMUSG00000069910	2505	264.429	76.0709	-1.80054	3.51e-11	7.43e-09	Down	Spdl1
ENSMUSG00000070044	5469	1102.37	544.899	-1.01739	3.36e-05	0.00104955	Down	Fam149a
ENSMUSG00000070047	14814	10087.4	4540.35	-1.15176	1.02e-05	0.000409106	Down	Fat1
ENSMUSG00000070284	2702	543.021	263.203	-1.04626	0.000584955	0.00850659	Down	Gmppb
ENSMUSG00000070305	3679	69.5434	19.047	-1.87642	0.00100666	0.0127402	Down	Mpzl3
ENSMUSG00000070336	2162	32.6434	6.3029	-2.38563	0.0083529	0.049163	Down	Fbxo47
ENSMUSG00000070337	9219	42.188	11.3088	-1.91171	0.000884295	0.0115289	Down	Gpr179
ENSMUSG00000070394	953	323.655	181.812	-0.83236	0.00221997	0.0214769	Down	Tmem256
ENSMUSG00000070436	2274	12896	5112.2	-1.33498	0.000453123	0.00718128	Down	Serpinh1
ENSMUSG00000070509	3586	1795.53	938.15	-0.93707	0.00013746	0.00311027	Down	Rgma
ENSMUSG00000070576	6860	565.551	325.31	-0.796995	0.00591009	0.0394876	Down	Mn1
ENSMUSG00000070643	3693	38.0741	13.2522	-1.51224	0.00378811	0.02983	Down	Sox13
ENSMUSG00000070691	3884	725.49	468.588	-0.630838	0.00410312	0.031552	Down	Runx3
ENSMUSG00000070808	6623	507.253	154.819	-1.71401	1.8e-05	0.000638387	Down	Bicra
ENSMUSG00000071379	1526	1802.36	537.838	-1.74519	0.00238216	0.0224308	Down	Hpcal1
ENSMUSG00000071452	1862	37.0758	1.26272	-4.8278	8.5e-05	0.00217432	Down	Gm11397
ENSMUSG00000071552	919	144.833	62.1144	-1.21744	1.15e-05	0.000450678	Down	Tigit
ENSMUSG00000072066	2640	75.1147	31.2788	-1.26639	0.00241031	0.022594	Down	6720489N17Rik
ENSMUSG00000072235	1803	38193.7	17478.7	-1.12776	0.000283383	0.00519107	Down	Tuba1a
ENSMUSG00000072941	3738	2531.12	450.389	-2.49127	3.35e-07	2.4e-05	Down	Sod3
ENSMUSG00000073130	2838	11.7793	0.631359	-4.16994	0.00642117	0.0415699	Down	Gm1141
ENSMUSG00000074071	3984	17.5826	0.749627	-4.6742	0.000380173	0.00637809	Down	Fam169b
ENSMUSG00000074364	5119	10372.3	6913.24	-0.585369	2.55e-06	0.00013727	Down	Ehd2
ENSMUSG00000074476	1696	123.895	25.6273	-2.26572	3.27e-05	0.00103	Down	Spc24
ENSMUSG00000074793	3413	92.7673	48.8412	-0.932451	0.00738214	0.0454381	Down	Hspa12b
ENSMUSG00000074867	2571	98.9929	24.9355	-1.99769	0.00792608	0.0474289	Down	Zfp808
ENSMUSG00000076441	1696	713.484	212.613	-1.74666	1.11e-10	2.13e-08	Down	Ass1
ENSMUSG00000078453	846	1187.98	571.693	-1.05585	0.00364178	0.0289322	Down	Abracl
ENSMUSG00000078771	2289	738.087	364.944	-1.01707	0.00485705	0.0350937	Down	Evi2a
ENSMUSG00000078773	2870	107.917	23.8858	-2.1816	4.92e-06	0.000231723	Down	Rad54b
ENSMUSG00000078920	1773	144.072	29.0843	-2.31219	0.00289643	0.0251042	Down	Ifi47
ENSMUSG00000078949	1094	498.966	217.227	-1.1977	0.000191048	0.0039943	Down	R3hdml
ENSMUSG00000079110	3174	856.47	344.817	-1.31375	0.00194349	0.0196436	Down	Capn3
ENSMUSG00000079357	3635	69.4098	5.53861	-3.653	0.00475926	0.034747	Down	NA
ENSMUSG00000079523	690	32164.1	14931	-1.10717	0.00102851	0.012931	Down	Tmsb10
ENSMUSG00000079559	1269	116.402	52.8855	-1.14387	0.00112312	0.0137585	Down	Colca2
ENSMUSG00000079592	1365	372.879	124.483	-1.5849	0.00152838	0.0169838	Down	C1qtnf5
ENSMUSG00000079685	5959	1325.85	348.469	-1.92859	0.000127006	0.0029365	Down	Ulbp1
ENSMUSG00000086596	4083	852.819	255.401	-1.74047	0.00808239	0.0480923	Down	Susd5
ENSMUSG00000089945	7576	1067.64	225.203	-2.24582	4.08e-05	0.00122498	Down	Pakap
ENSMUSG00000090053	3271	411.992	214.989	-0.93871	0.00287174	0.0249493	Down	Palm2
ENSMUSG00000090176	1750	48.5385	8.75896	-2.49102	0.000268956	0.00501358	Down	Cd200r2
ENSMUSG00000090231	2751	181.744	87.3597	-1.06049	0.000790227	0.0106371	Down	Cfb
ENSMUSG00000090841	3040	14301.1	8567.97	-0.739092	7.55e-06	0.000326524	Down	Myl6
ENSMUSG00000091243	7009	4335.93	2167.66	-1.00037	0.000453626	0.00718128	Down	Vgll3
ENSMUSG00000091387	5087	321.711	130.316	-1.30663	0.00112937	0.0138104	Down	Gcnt4
ENSMUSG00000091736	2867	38.4657	5.23268	-2.87128	0.00773785	0.0468322	Down	Yy2
ENSMUSG00000091955	485	694.779	311.774	-1.15757	6.45e-05	0.00176474	Down	NA
ENSMUSG00000092541	889	48.5532	0	-8.03163	4.23e-08	4.04e-06	Down	NA
ENSMUSG00000093485	1780	134.619	30.2914	-2.15927	0.00589202	0.0394244	Down	NA
ENSMUSG00000095742	251	341.384	177.404	-0.945673	0.0015334	0.0170258	Down	NA
ENSMUSG00000096140	1307	10.5902	0	-5.83964	0.000477371	0.00744017	Down	Ankrd66
ENSMUSG00000097328	1435	464.532	204.182	-1.18746	0.00409141	0.0314796	Down	Tnfsf12
ENSMUSG00000097789	7055	2268.76	685.153	-1.72784	0.00491379	0.0353366	Down	NA
ENSMUSG00000098470	2429	362.705	181.029	-1.00518	0.00190924	0.0193841	Down	C1rb
ENSMUSG00000102543	5777	395.581	133.634	-1.563	4.85e-13	1.67e-10	Down	Pcdhgc5
ENSMUSG00000102805	2913	110.38	39.7217	-1.48156	0.00560214	0.0384393	Down	Arfip1
ENSMUSG00000109156	1991	76.798	12.5911	-2.62329	2.46e-05	0.000834107	Down	NA
ENSMUSG00000110266	8516	70.0341	5.33628	-3.70947	5.79e-08	5.27e-06	Down	Gm32742
ENSMUSG00000115302	4738	327.223	2.76197	-6.89771	2.42e-06	0.000131099	Down	NA
ENSMUSG00000117098	837	7414.04	3486.49	-1.08864	1.48e-07	1.19e-05	Down	NA
ENSMUSG00000117975	3760	2770.9	1220.36	-1.18346	4.02e-06	0.000194018	Down	Itprip
ENSMUSG00000118483	857	12.1648	0.947038	-3.63398	0.00797532	0.04762	Down	NA
ENSMUSG00000000056	4395	2409.11	4227.93	0.811547	2.59e-06	0.00013875	Up	Narf
ENSMUSG00000000093	3626	3.6049	84.5123	4.55781	0.000112729	0.00270648	Up	Tbx2
ENSMUSG00000000276	8347	346.716	630.47	0.864054	0.00589895	0.0394324	Up	Dgke
ENSMUSG00000000325	4698	654.717	3009	2.20041	0.00385729	0.0302136	Up	Arvcf
ENSMUSG00000000435	2083	380.977	1666.93	2.12953	0.0032425	0.026791	Up	Myf5
ENSMUSG00000000439	6230	1161.55	1970.1	0.762139	0.000853127	0.0112634	Up	Mkrn2
ENSMUSG00000000486	1486	10.2215	153.888	3.91113	6.61e-06	0.000290435	Up	Gm4532
ENSMUSG00000000552	2348	676.881	4131.05	2.60954	0.00552211	0.0380491	Up	Zfp385a
ENSMUSG00000000690	1964	32.6299	107.904	1.72361	0.00649338	0.0418601	Up	Hoxb6
ENSMUSG00000001016	3167	1741.4	4794.37	1.46115	0.00438096	0.0330374	Up	Ilf2
ENSMUSG00000001021	2458	8.16333	280.261	5.0991	5.25e-05	0.00150785	Up	S100a3
ENSMUSG00000001138	5292	608.095	987.892	0.700481	0.000363377	0.00617158	Up	Cnnm3
ENSMUSG00000001281	2683	34.3245	75.8694	1.14739	0.00726487	0.0451534	Up	Itgb7
ENSMUSG00000001313	1578	201.33	538.252	1.41854	0.00184015	0.0188636	Up	Rnd2
ENSMUSG00000001323	3699	894.4	1530.88	0.775273	5.49e-08	5.04e-06	Up	Srr
ENSMUSG00000001420	2406	21.1064	138.293	2.70887	0.00228322	0.0219498	Up	Tmem79
ENSMUSG00000001510	2607	161.125	842.991	2.38753	0.00180996	0.0187639	Up	Dlx3
ENSMUSG00000001569	9219	1665.77	2670.6	0.681226	0.00389618	0.0304178	Up	Nom1
ENSMUSG00000001627	3378	1782.16	3458.12	0.956438	0.0010838	0.0134445	Up	Ifrd1
ENSMUSG00000001655	2461	377.153	3651.75	3.27542	0.000570239	0.00839014	Up	Hoxc13
ENSMUSG00000001656	2021	893.007	2764.27	1.63031	0.00301911	0.0257078	Up	Hoxc11
ENSMUSG00000001657	2223	81.0068	192.622	1.24893	0.00228694	0.0219672	Up	Hoxc8
ENSMUSG00000001661	1581	465.641	2021.86	2.1187	3.96e-08	3.81e-06	Up	Hoxc6
ENSMUSG00000001674	2258	1503.47	2582.51	0.780597	0.00269921	0.0240556	Up	Ddx18
ENSMUSG00000001785	2572	1343.63	3433.94	1.35379	0.00363368	0.0289118	Up	Pwp1
ENSMUSG00000001918	2807	341.691	797.229	1.22267	0.00321421	0.0267016	Up	Slc1a5
ENSMUSG00000001962	1918	1522.56	3413.06	1.16466	0.00165161	0.0178205	Up	Fam50a
ENSMUSG00000002083	1814	172.55	694.455	2.00931	0.00400773	0.0310092	Up	Bbc3
ENSMUSG00000002325	3869	384.851	1190.36	1.62923	0.00205621	0.0203799	Up	Irf9
ENSMUSG00000002329	1733	630.76	1198.73	0.926385	1.56e-05	0.000567761	Up	Mdp1
ENSMUSG00000002486	3138	460.786	1115.88	1.2762	0.00814404	0.0483754	Up	Tchp
ENSMUSG00000002550	2005	888.546	2438.48	1.45657	0.00683446	0.0433479	Up	Uck1
ENSMUSG00000002625	4381	870.638	1734.27	0.994549	0.00246333	0.0228819	Up	Akap8l
ENSMUSG00000002825	1316	160.875	544.791	1.76002	0.00337414	0.027597	Up	Qtrt1
ENSMUSG00000002831	6350	91.5125	595.731	2.70288	0.000327385	0.00574469	Up	Plin4
ENSMUSG00000002910	2355	267.024	414.876	0.635983	0.00014672	0.00326607	Up	Arrdc2
ENSMUSG00000002996	3142	4000.51	6938.15	0.794546	7.08e-08	6.32e-06	Up	Hbp1
ENSMUSG00000003039	3387	2600.45	4588.76	0.819463	0.00533277	0.0372736	Up	Fam32a
ENSMUSG00000003235	2554	1770.91	3768.66	1.08964	0.00569081	0.0387375	Up	Eif2b5
ENSMUSG00000003382	7263	1026.94	3423.93	1.73741	0.00147689	0.0165587	Up	Etv3
ENSMUSG00000003526	4943	18.6385	70.3713	1.92262	0.00110344	0.0136388	Up	Prodh
ENSMUSG00000003545	3782	43.8456	305.453	2.80158	0.00156306	0.0172162	Up	Fosb
ENSMUSG00000003662	3075	1058.21	1603.44	0.599978	0.00255985	0.0233891	Up	Ciao1
ENSMUSG00000003849	1553	150.831	321.954	1.0914	0.000824224	0.010966	Up	Nqo1
ENSMUSG00000003923	4167	1187.99	2061.24	0.794938	0.00473258	0.034719	Up	Tfam
ENSMUSG00000003934	3183	22.4895	340.127	3.91895	0.000105387	0.00258465	Up	Efnb3
ENSMUSG00000004360	5681	428.28	975.029	1.18744	0.00413915	0.0317404	Up	9330159F19Rik
ENSMUSG00000004815	5345	302.317	1080.1	1.83756	0.00693009	0.0438332	Up	Dgkq
ENSMUSG00000005150	2707	733.236	1121.49	0.613001	0.000341547	0.00593025	Up	Wdr83
ENSMUSG00000005198	6740	6454.37	21290.3	1.72186	0.000634398	0.00896421	Up	Polr2a
ENSMUSG00000005362	2898	1849.68	3084.55	0.738136	2.71e-06	0.000142684	Up	Crbn
ENSMUSG00000005370	4251	1202.57	8952.62	2.89619	0.000104075	0.00256356	Up	Msh6
ENSMUSG00000005413	1569	1534.6	8431.86	2.45801	4.51e-05	0.00133136	Up	Hmox1
ENSMUSG00000005483	2996	2568.45	11641.2	2.18027	0.00133664	0.0155568	Up	Dnajb1
ENSMUSG00000005687	3878	1139.19	3701.77	1.70024	0.00396618	0.0308443	Up	Bcas2
ENSMUSG00000005718	2247	130.551	357.874	1.4566	0.00164514	0.0177663	Up	Tfap4
ENSMUSG00000005846	1945	3849.65	7573.16	0.976214	0.00177858	0.0186068	Up	Rsl1d1
ENSMUSG00000005949	2723	922.704	2311.91	1.32523	3.54e-07	2.52e-05	Up	Ctns
ENSMUSG00000005951	2856	53.1645	192.015	1.84964	0.00133954	0.0155773	Up	Shpk
ENSMUSG00000006262	8967	2556.06	4393.6	0.781656	0.00271938	0.0241514	Up	Mob1b
ENSMUSG00000006273	2825	2929.39	6004.7	1.03554	0.00401891	0.0310782	Up	Atp6v1b2
ENSMUSG00000006373	1857	3213.47	10451.8	1.70157	0.000923007	0.0119116	Up	Pgrmc1
ENSMUSG00000006411	3636	6.66199	1107.04	7.38143	2.83e-08	2.86e-06	Up	Nectin4
ENSMUSG00000006418	3001	1038.34	2876.63	1.47017	0.00601214	0.0398835	Up	Rnf114
ENSMUSG00000006585	2696	167.637	1148.37	2.77641	0.00154431	0.0171055	Up	Cdt1
ENSMUSG00000006599	2736	2076.57	3251.02	0.646872	0.00489932	0.0352695	Up	Gtf2h1
ENSMUSG00000006641	3436	209.037	1080.72	2.37046	0.000916766	0.0118422	Up	Slc5a6
ENSMUSG00000006818	5861	1831.12	2748.85	0.586201	0.00407309	0.0313737	Up	Sod2
ENSMUSG00000006998	3001	8269.33	18767.9	1.18244	0.00230696	0.0221008	Up	Psmd2
ENSMUSG00000007021	1965	21.0389	184.902	3.13448	0.00708541	0.0443668	Up	Syngr3
ENSMUSG00000007033	2472	165.858	653.303	1.97807	0.00774669	0.0468651	Up	Hspa1l
ENSMUSG00000007379	4979	99.3939	384.775	1.95408	0.00219983	0.021342	Up	Dennd2c
ENSMUSG00000007613	5756	1011.6	1902.18	0.911067	6.48e-10	9.98e-08	Up	Tgfbr1
ENSMUSG00000007739	2484	5566.72	9233.75	0.730124	0.00256609	0.023421	Up	Cct4
ENSMUSG00000007812	4157	1504.09	3497.38	1.21747	1.39e-05	0.000516105	Up	Zfp655
ENSMUSG00000007877	948	48.9792	135.681	1.47019	0.00458749	0.0340108	Up	Tcap
ENSMUSG00000008167	2327	842.868	4682.43	2.47387	0.0017741	0.0186068	Up	Fbxw9
ENSMUSG00000008226	3309	857.713	1457.98	0.765412	0.00183753	0.0188508	Up	Scrn3
ENSMUSG00000008301	1942	1386.31	2774.44	1.00102	0.0041769	0.0319054	Up	Phax
ENSMUSG00000009535	5008	1487.48	2930.2	0.978354	0.0010705	0.0133284	Up	Rnmt
ENSMUSG00000009905	5518	1397.8	2570.32	0.87901	3.8e-07	2.68e-05	Up	Kdsr
ENSMUSG00000010025	3091	2522.91	3799.39	0.590851	0.00294981	0.0254199	Up	Aldh3a2
ENSMUSG00000010051	3014	202.007	1896.34	3.23098	0.00061241	0.00882191	Up	Hyal1
ENSMUSG00000010095	2813	2607.77	10939.3	2.06864	0.000373106	0.00629022	Up	Slc3a2
ENSMUSG00000010290	3458	1550.39	3757.37	1.27721	6.77e-05	0.0018342	Up	AI597479
ENSMUSG00000010358	1362	486.338	2331.85	2.2615	0.000689394	0.00957012	Up	Ifi35
ENSMUSG00000010651	1689	25.9496	64.5255	1.32543	0.000259809	0.00492992	Up	Acaa1b
ENSMUSG00000011267	1530	17.025	298.267	4.13099	0.00765109	0.0465529	Up	Zfp296
ENSMUSG00000011960	7397	2635.9	5116.19	0.956846	0.000484353	0.00747919	Up	Ccnt1
ENSMUSG00000012640	4363	659.413	1441.43	1.12843	0.000622737	0.00889181	Up	Zfp715
ENSMUSG00000013465	2754	1057.29	2031.92	0.942599	0.00680978	0.0432489	Up	Nelfb
ENSMUSG00000013822	1053	577.878	1076.38	0.8979	0.00681256	0.0432489	Up	Elof1
ENSMUSG00000014074	4460	1412.44	2165.68	0.61711	0.000377104	0.00634208	Up	Rnf168
ENSMUSG00000014747	1739	3.06682	44.7293	3.8805	0.00826979	0.0488063	Up	Ankrd53
ENSMUSG00000014771	1924	264.179	1104.39	2.06368	0.00144254	0.0163074	Up	Pdcd2
ENSMUSG00000014773	3581	372.475	707.052	0.924996	0.00536729	0.0373121	Up	Dll1
ENSMUSG00000014905	2461	2270.94	8725.16	1.94191	0.00326996	0.0269209	Up	Dnajb9
ENSMUSG00000015023	2547	1037.95	1739.18	0.74468	0.00784569	0.047153	Up	Ddx19a
ENSMUSG00000015217	1743	599.398	1822.64	1.60464	0.00545441	0.0377256	Up	Hmgb3
ENSMUSG00000015377	5261	113.62	287.332	1.33809	0.00318164	0.0265111	Up	Dennd6b
ENSMUSG00000015467	1478	8.84088	50.2435	2.52003	0.0084839	0.0497074	Up	Egfl8
ENSMUSG00000015659	4007	658.208	998.615	0.602094	1.63e-05	0.000590055	Up	Serac1
ENSMUSG00000015757	3471	2085.71	3335.37	0.677311	2.61e-06	0.000139245	Up	Ppil4
ENSMUSG00000015837	2673	14493.3	32578.3	1.16854	1.35e-05	0.000503622	Up	Sqstm1
ENSMUSG00000015947	2589	3.52898	85.6612	4.60373	2.87e-05	0.000930333	Up	Fcgr1
ENSMUSG00000016239	2911	46.4796	788.227	4.0842	6.68e-06	0.000291917	Up	Lonrf3
ENSMUSG00000016496	3622	27.8046	191.448	2.79086	1.99e-05	0.000694942	Up	Cd274
ENSMUSG00000016503	1970	505.688	1789.76	1.82355	0.000802505	0.0107394	Up	Gtf3a
ENSMUSG00000016510	4927	765.186	1357.77	0.827938	0.00777786	0.0469365	Up	Mtif3
ENSMUSG00000016526	3164	105.736	987.013	3.22353	0.000166598	0.00363904	Up	Dyrk3
ENSMUSG00000016619	4766	2036.07	6030.94	1.56664	0.00210566	0.0206616	Up	Nup50
ENSMUSG00000017561	2396	877.639	1343.27	0.61438	0.00504768	0.0358127	Up	Crlf3
ENSMUSG00000017667	8205	720.555	2597.12	1.84981	0.00207861	0.0205181	Up	Zfp334
ENSMUSG00000017697	1688	41.2554	196.614	2.25167	0.00710946	0.0444164	Up	Ada
ENSMUSG00000018102	1156	1009.44	2155.16	1.09443	0.000131117	0.00301132	Up	Hist1h2bc
ENSMUSG00000018239	1267	310.477	760.445	1.29277	0.00269986	0.0240556	Up	Zcchc10
ENSMUSG00000018372	2696	393.129	772.293	0.974699	0.000846785	0.0112012	Up	Cep95
ENSMUSG00000018428	3828	1376.06	3819.47	1.47292	0.00338549	0.0276404	Up	Akap1
ENSMUSG00000018433	3158	1370.64	2469.41	0.849599	0.00261471	0.0236648	Up	Nol11
ENSMUSG00000018509	1032	140.892	562.066	1.99632	0.00566756	0.0386941	Up	Cenpv
ENSMUSG00000018604	4982	720.336	1680.79	1.22269	0.00730994	0.0453155	Up	Tbx3
ENSMUSG00000018733	2729	391.631	831.881	1.08687	0.00624777	0.0408316	Up	Pex12
ENSMUSG00000018765	2951	3610.93	7672.91	1.08745	0.00641856	0.0415699	Up	Fxr2
ENSMUSG00000018774	1230	27.344	1142.41	5.38309	2.83e-06	0.000146829	Up	Cd68
ENSMUSG00000018848	2109	3405.35	5231.42	0.619509	0.00530806	0.0371618	Up	Rars
ENSMUSG00000018882	2431	1141.53	2384.26	1.06268	0.00583253	0.0392306	Up	Mrpl45
ENSMUSG00000019039	1746	504.96	1737.83	1.78327	0.00674487	0.0430363	Up	Dalrd3
ENSMUSG00000019132	5849	8315.31	19334.4	1.21735	0.00461199	0.0341297	Up	BC005537
ENSMUSG00000019143	3336	602.003	949.175	0.658022	0.00028995	0.00527625	Up	Hars2
ENSMUSG00000019194	1573	293.024	1989.53	2.76343	0.00119666	0.0144029	Up	Scn1b
ENSMUSG00000019301	1339	8.85194	58.3324	2.72857	0.00024072	0.00465765	Up	Hsd17b1
ENSMUSG00000019437	2897	456.248	1121.88	1.29853	1.17e-06	7.08e-05	Up	Tlcd1
ENSMUSG00000019464	4694	296.002	510.341	0.786632	0.00798588	0.0476366	Up	Ptger1
ENSMUSG00000019558	3964	2709.33	4835.33	0.835809	1.72e-05	0.000615799	Up	Slc6a8
ENSMUSG00000019718	1952	131.321	572.887	2.12547	0.0034062	0.0277437	Up	L3hypdh
ENSMUSG00000019734	2310	40.161	142.892	1.83095	0.00584466	0.0392705	Up	Tmc4
ENSMUSG00000019791	2445	196.341	295.419	0.590972	0.00845627	0.0496072	Up	Hint3
ENSMUSG00000019794	1775	996.38	1600.18	0.683363	0.0017473	0.0184479	Up	Katna1
ENSMUSG00000019808	1466	143.168	423.445	1.56392	0.00519956	0.0365795	Up	Adat2
ENSMUSG00000019818	2922	19112.6	30377.7	0.668514	0.000218882	0.00438513	Up	Cd164
ENSMUSG00000019837	2526	1006.94	2268.17	1.17152	0.00237624	0.0224308	Up	Gtf3c6
ENSMUSG00000019857	2201	623.484	1265.86	1.02147	1.22e-09	1.7e-07	Up	Gm3902
ENSMUSG00000019877	2880	19521	29852.8	0.612865	2.54e-05	0.000850276	Up	Serinc1
ENSMUSG00000019878	4527	1329.02	2376.83	0.838808	0.0001054	0.00258465	Up	Hsf2
ENSMUSG00000019923	2676	2177.69	4558.4	1.06581	0.00744946	0.0456652	Up	Zwint
ENSMUSG00000019948	1705	376.836	1055.69	1.48633	7.4e-08	6.49e-06	Up	Actr6
ENSMUSG00000019961	4441	2906.88	6356.3	1.12877	0.00127441	0.0150931	Up	Tmpo
ENSMUSG00000020063	4430	1105.32	3945.73	1.83586	0.000125653	0.00291994	Up	Sirt1
ENSMUSG00000020075	4722	4993.07	8991.49	0.848667	0.00101753	0.0128305	Up	Ddx21
ENSMUSG00000020078	2712	4155.16	6627.12	0.67349	5.4e-06	0.00024852	Up	Vps26a
ENSMUSG00000020108	1755	566.498	3436.68	2.60093	0.000320028	0.00566618	Up	Ddit4
ENSMUSG00000020115	3024	1587.93	2442.76	0.62155	0.00211423	0.0207251	Up	Tbk1
ENSMUSG00000020116	1544	1545.98	3067.53	0.988576	0.00386305	0.0302136	Up	Pno1
ENSMUSG00000020183	5195	6.09603	64.1871	3.39816	0.0017551	0.0185018	Up	Cpm
ENSMUSG00000020184	3145	1895.5	6770.38	1.8367	0.000478841	0.00744017	Up	Mdm2
ENSMUSG00000020224	1664	1545.3	5729.04	1.89043	0.00160269	0.0174595	Up	Llph
ENSMUSG00000020248	3722	613.772	1670.72	1.44476	0.00100793	0.0127446	Up	Nfyb
ENSMUSG00000020250	3622	4306	8756.02	1.02399	1.05e-05	0.000416213	Up	Txnrd1
ENSMUSG00000020255	123179	1620.9	3746.05	1.20868	0.00180769	0.0187639	Up	D10Wsu102e
ENSMUSG00000020268	3431	39.8941	97.0958	1.29089	0.00702071	0.0442842	Up	Lyrm7
ENSMUSG00000020326	3512	9663.46	53464	2.46796	0.000647049	0.00909239	Up	Ccng1
ENSMUSG00000020385	3543	1336.62	2610.58	0.965978	0.000417862	0.00677094	Up	Clk4
ENSMUSG00000020409	3625	2673.96	5024.27	0.909929	0.00155105	0.0171523	Up	Slu7
ENSMUSG00000020423	2743	635.797	8816.22	3.79352	4.81e-05	0.00140098	Up	Btg2
ENSMUSG00000020430	2923	2480.68	4484.43	0.854283	0.00371791	0.0293781	Up	Pes1
ENSMUSG00000020434	2590	45.0419	192.716	2.09945	0.000120652	0.00282281	Up	4921536K21Rik
ENSMUSG00000020437	4752	4.48956	206.401	5.53135	0.00435672	0.0329496	Up	Myo1g
ENSMUSG00000020455	3522	1001.99	3499.61	1.80437	0.0046363	0.0342544	Up	Trim11
ENSMUSG00000020482	3372	1256.55	5542.3	2.14109	3.13e-05	0.0010014	Up	Ccdc117
ENSMUSG00000020485	854	671.672	1215.13	0.855728	0.00284236	0.024764	Up	Supt4a
ENSMUSG00000020495	3218	1109.52	3345.91	1.59253	0.0025087	0.0230851	Up	Smg8
ENSMUSG00000020522	4839	1396.64	3137.58	1.16778	0.00116033	0.0140855	Up	Mfap3
ENSMUSG00000020525	2899	549.187	1357.9	1.30616	0.00235382	0.0223073	Up	Ppm1d
ENSMUSG00000020534	2858	128.546	576.359	2.16443	0.000230276	0.00451209	Up	Shmt1
ENSMUSG00000020561	4325	1060.32	2200.01	1.05319	0.00773382	0.0468284	Up	Twistnb
ENSMUSG00000020572	4527	2224.09	3868.34	0.798458	0.000581067	0.00846794	Up	Nampt
ENSMUSG00000020593	5581	934.863	2482.07	1.40883	1.16e-08	1.28e-06	Up	Lpin1
ENSMUSG00000020611	6160	3013.59	6212.9	1.04388	0.000455207	0.00718976	Up	Gna13
ENSMUSG00000020653	4086	439.815	1234.31	1.48882	0.000132777	0.00303226	Up	Klf11
ENSMUSG00000020677	3194	1440.1	2369.02	0.71824	0.000743615	0.0101487	Up	Ddx52
ENSMUSG00000020680	2068	2203.97	3362.38	0.609173	1.19e-05	0.00046393	Up	Taf15
ENSMUSG00000020706	3144	2556.89	6706.03	1.3911	0.00511266	0.0361991	Up	Ftsj3
ENSMUSG00000020707	1984	207.885	441.811	1.08884	0.00402358	0.0310794	Up	Rnf135
ENSMUSG00000020712	3511	4.09626	24.236	2.55967	0.00576229	0.0389542	Up	Tcam1
ENSMUSG00000020722	1249	1682.11	2816.25	0.743518	0.00732211	0.0453155	Up	Cacng1
ENSMUSG00000020744	2614	320.883	634.356	0.983465	0.00473453	0.034719	Up	Slc25a19
ENSMUSG00000020781	1979	235.927	995.916	2.07759	0.0040393	0.0311658	Up	Tsen54
ENSMUSG00000020782	3612	14.5709	119.845	3.04238	0.000206527	0.00419675	Up	Llgl2
ENSMUSG00000020793	1940	39.4372	193.218	2.29398	0.00126674	0.0150618	Up	Galr2
ENSMUSG00000020834	1791	95.6516	369.88	1.95154	0.00636938	0.04141	Up	Dhrs13
ENSMUSG00000020863	5244	2934.12	4453.55	0.601877	7.85e-05	0.0020418	Up	Luc7l3
ENSMUSG00000020888	5037	949.092	2166.48	1.1908	0.00247488	0.0229001	Up	Dvl2
ENSMUSG00000020923	4692	3468.95	5395.77	0.637353	0.000274577	0.0050771	Up	Ubtf
ENSMUSG00000020930	1841	35.6441	91.8445	1.36961	0.00296981	0.025487	Up	Ccdc103
ENSMUSG00000020948	6459	1175.41	2369.68	1.01178	0.000541562	0.0080718	Up	Klhl28
ENSMUSG00000020962	6064	1073.05	2424.46	1.17623	0.000268647	0.00501358	Up	Gtf2a1
ENSMUSG00000020994	3485	2814.6	5440.33	0.950825	0.00434443	0.0328928	Up	Pnn
ENSMUSG00000021037	2252	3685.53	5987.45	0.700096	0.00714248	0.0445619	Up	Ahsa1
ENSMUSG00000021057	6687	3.28427	27.3039	3.0652	0.00634229	0.0412711	Up	Akap5
ENSMUSG00000021072	2795	2443.74	3910.44	0.678377	0.00601957	0.0398995	Up	Tmx1
ENSMUSG00000021118	1583	5.20164	260.741	5.64074	0.000516406	0.00779823	Up	Plek2
ENSMUSG00000021120	2868	402.37	860.356	1.0967	0.00176661	0.0186041	Up	Pigh
ENSMUSG00000021125	1428	1.96277	13.3852	2.78303	0.00556731	0.0383139	Up	Arg2
ENSMUSG00000021149	8783	2474.19	3978.58	0.685524	1.69e-06	9.64e-05	Up	Gtpbp4
ENSMUSG00000021178	1591	5717.03	11941.3	1.06264	0.00443432	0.0333532	Up	Psmc1
ENSMUSG00000021189	5363	1645.25	2506.8	0.607757	0.00252698	0.0231449	Up	Atxn3
ENSMUSG00000021222	2008	469.019	1786.92	1.92984	0.00619164	0.0405805	Up	Dcaf4
ENSMUSG00000021226	2196	163.832	408.718	1.31717	2.55e-10	4.49e-08	Up	Acot2
ENSMUSG00000021243	749	834.524	1346.45	0.69037	0.000126175	0.00292713	Up	Fcf1
ENSMUSG00000021250	2108	168.33	946.518	2.49161	0.00791684	0.0474031	Up	Fos
ENSMUSG00000021266	2878	972.15	1459.72	0.586263	0.00542207	0.0375876	Up	Wars
ENSMUSG00000021270	3281	25960.8	46696.7	0.846989	7.46e-05	0.00197951	Up	Hsp90aa1
ENSMUSG00000021281	3889	3025.54	6220.36	1.03968	0.00263503	0.0237394	Up	Tnfaip2
ENSMUSG00000021282	4050	7380.76	15497.2	1.07014	0.000139212	0.0031242	Up	Eif5
ENSMUSG00000021339	7035	2232.21	4245.11	0.927424	0.00505968	0.0358609	Up	Mrs2
ENSMUSG00000021371	4339	993.1	1714.1	0.787652	0.00458744	0.0340108	Up	Mcur1
ENSMUSG00000021392	4765	1220.03	2790.25	1.19359	0.000283857	0.00519285	Up	Nol8
ENSMUSG00000021413	7844	3604.08	5869.69	0.703714	3.27e-05	0.00103	Up	Prpf4b
ENSMUSG00000021532	5134	224.47	830.586	1.88779	0.00607684	0.0401186	Up	Fastkd3
ENSMUSG00000021555	3793	1514.05	2346.44	0.632301	0.00066302	0.00928836	Up	Naa35
ENSMUSG00000021639	1796	495.797	746.823	0.591739	0.000764503	0.0103618	Up	Gtf2h2
ENSMUSG00000021645	1222	448.212	1002.24	1.16147	0.00451292	0.0337522	Up	Smn1
ENSMUSG00000021661	2328	675.766	1107.5	0.712939	0.00141869	0.0161204	Up	Ankra2
ENSMUSG00000021681	3249	2050.7	3573.43	0.801323	0.00154183	0.0170919	Up	Aggf1
ENSMUSG00000021712	4258	1531.47	2988	0.964509	0.000105604	0.00258504	Up	Trim23
ENSMUSG00000021737	1387	3104.02	5138.62	0.727322	0.00728094	0.0451852	Up	Psmd6
ENSMUSG00000021831	4418	2353.13	3797.07	0.69017	0.00551513	0.0380309	Up	Ero1l
ENSMUSG00000021832	2234	6072.6	11022.1	0.860047	0.0013152	0.0154247	Up	Psmc6
ENSMUSG00000021876	1518	4390.8	6707.28	0.611325	0.00567795	0.0387154	Up	Rnase4
ENSMUSG00000021890	4918	2559.25	6275.38	1.29405	0.00486722	0.0351118	Up	Eaf1
ENSMUSG00000021891	3946	748.548	1945.44	1.37822	0.00447319	0.0335721	Up	Mettl6
ENSMUSG00000021902	3761	179.381	349.424	0.963175	0.00323387	0.0267531	Up	Phf7
ENSMUSG00000021904	4540	10.165	63.6447	2.64563	0.00567912	0.0387154	Up	Sema3g
ENSMUSG00000021996	1988	3876.17	8977.08	1.2115	3.25e-07	2.34e-05	Up	Esd
ENSMUSG00000022009	3974	522.569	1126.05	1.10785	0.00185746	0.0190268	Up	Nufip1
ENSMUSG00000022023	3704	1946.04	2966.9	0.608604	0.000634669	0.00896421	Up	Wbp4
ENSMUSG00000022043	3678	5411.19	11214.4	1.05138	0.00204329	0.0202767	Up	Trim35
ENSMUSG00000022044	1361	69.6454	704.39	3.33849	0.00211927	0.020736	Up	Stmn4
ENSMUSG00000022074	3179	703.809	5340.99	2.92389	0.000103313	0.00255627	Up	Tnfrsf10b
ENSMUSG00000022109	2103	658.29	1500.05	1.18838	0.00530415	0.0371534	Up	Med4
ENSMUSG00000022124	4309	1509.84	3983.66	1.39975	0.000632183	0.00895669	Up	Fbxl3
ENSMUSG00000022125	2445	2721.19	4828.34	0.827466	8.29e-05	0.00213178	Up	Cln5
ENSMUSG00000022194	1775	1197.11	2042	0.770404	0.00617196	0.0405094	Up	Pabpn1
ENSMUSG00000022204	1200	703.548	1335.82	0.925389	0.00768969	0.0467051	Up	Ngdn
ENSMUSG00000022228	4366	1394.4	2484.7	0.833456	6.41e-05	0.00175602	Up	Zscan26
ENSMUSG00000022235	1155	239.313	761.178	1.66951	0.00198242	0.0199067	Up	Cmbl
ENSMUSG00000022247	2664	1779.96	4780.16	1.42527	0.000644437	0.00907094	Up	Brix1
ENSMUSG00000022248	4206	327.663	609.534	0.896255	0.00745209	0.0456652	Up	Rad1
ENSMUSG00000022313	2921	412.524	1128.43	1.45195	0.00173842	0.0183965	Up	Utp23
ENSMUSG00000022358	6976	3471.02	6454.83	0.89526	3.7e-08	3.61e-06	Up	Fbxo32
ENSMUSG00000022385	2692	296.402	4443.32	3.90597	0.000874205	0.0114296	Up	Gtse1
ENSMUSG00000022389	4403	3975.15	7815.44	0.975384	0.00311192	0.0260882	Up	Tef
ENSMUSG00000022426	3440	2430.04	5170	1.08927	0.00087229	0.0114283	Up	Gm10651
ENSMUSG00000022428	1147	842.736	2588.37	1.6189	0.00559649	0.0384393	Up	Cby1
ENSMUSG00000022474	1300	696.002	3875.67	2.47732	0.00194139	0.0196381	Up	Pmm1
ENSMUSG00000022507	4072	3084.67	5160.32	0.742414	7.38e-05	0.00197226	Up	1810013L24Rik
ENSMUSG00000022526	4036	762.052	1713.07	1.16878	0.00295792	0.0254434	Up	Zfp251
ENSMUSG00000022538	3180	1119.3	2102.49	0.909677	0.00120464	0.0144736	Up	Lsg1
ENSMUSG00000022550	2262	319.341	659.762	1.04679	0.00290242	0.0251281	Up	Adck5
ENSMUSG00000022574	1898	5.11465	27.2404	2.41584	0.00599349	0.0398029	Up	Naprt
ENSMUSG00000022596	2859	3.43552	81.4737	4.5586	5.37e-05	0.00153059	Up	Slurp1
ENSMUSG00000022602	3055	17.7195	399.348	4.49611	0.00029536	0.0053463	Up	Arc
ENSMUSG00000022615	2037	112.533	691.591	2.62048	0.00835881	0.049163	Up	Tymp
ENSMUSG00000022682	3582	2509.62	4868.82	0.956194	0.00520095	0.0365795	Up	Rrn3
ENSMUSG00000022742	3097	1252.09	3330.68	1.41156	0.00323071	0.0267531	Up	Cpox
ENSMUSG00000022760	1248	373.519	694.626	0.894592	0.00572368	0.038835	Up	Thap7
ENSMUSG00000022773	3322	22.5654	110.667	2.29553	0.00263737	0.0237394	Up	Ypel1
ENSMUSG00000022797	4890	2564.93	5032.71	0.972363	0.000797691	0.0106915	Up	Tfrc
ENSMUSG00000022800	4312	1455.18	2201.79	0.59798	0.00027342	0.00506516	Up	Fyttd1
ENSMUSG00000022814	3484	1160.28	2276.43	0.972405	0.00851333	0.0498374	Up	Umps
ENSMUSG00000022864	6127	566.97	977.558	0.786256	0.00693828	0.0438447	Up	D16Ertd472e
ENSMUSG00000022884	2708	7391.91	11542.8	0.64302	0.00265009	0.0237972	Up	Eif4a2
ENSMUSG00000022889	2294	1330.66	2871.74	1.10988	0.00815698	0.0484105	Up	Mrpl39
ENSMUSG00000022947	1170	306.78	1229.31	2.00255	0.00217254	0.021137	Up	Cbr3
ENSMUSG00000022961	8731	11646.6	18013	0.629169	0.00416864	0.03186	Up	Son
ENSMUSG00000022965	3708	1691.91	5008.27	1.56569	0.00276909	0.0244217	Up	Ifngr2
ENSMUSG00000022974	3973	1525.16	3852.25	1.33678	0.00126328	0.0150337	Up	Paxbp1
ENSMUSG00000022996	2709	351.424	1006.2	1.5181	0.000774756	0.0104666	Up	Wnt10b
ENSMUSG00000022999	2548	308.867	766.278	1.31133	0.00328017	0.0269888	Up	Lmbr1l
ENSMUSG00000023025	6530	5192.01	9123.83	0.813413	6.84e-05	0.00184588	Up	Larp4
ENSMUSG00000023034	2553	386.336	3147.78	3.02652	0.00127706	0.0150932	Up	Nr4a1
ENSMUSG00000023039	4094	8.03994	163.149	4.34783	0.000871642	0.0114283	Up	Krt7
ENSMUSG00000023067	2080	20438.4	50759	1.31239	0.00238145	0.0224308	Up	Cdkn1a
ENSMUSG00000023235	2549	105.718	365.232	1.79102	0.000754093	0.0102815	Up	Ccl25
ENSMUSG00000023259	4362	89.0767	196.888	1.14351	0.00588965	0.0394244	Up	Slc26a6
ENSMUSG00000023277	1627	289.871	1094.47	1.91703	0.00471474	0.0346182	Up	Twf2
ENSMUSG00000023755	1604	80.6743	335.926	2.059	0.00166906	0.0178802	Up	Rhebl1
ENSMUSG00000023883	3901	3475.97	5235.74	0.590892	5.35e-06	0.000248037	Up	Phf10
ENSMUSG00000023935	2685	231.24	384.847	0.734338	0.000457742	0.00722151	Up	Spats1
ENSMUSG00000024014	2698	445.467	1559.73	1.80834	2.66e-05	0.00087579	Up	Pim1
ENSMUSG00000024037	4154	512.656	1428.86	1.47878	0.00452938	0.033791	Up	Wdr4
ENSMUSG00000024081	4070	2117.64	4378.87	1.04817	0.00438273	0.0330374	Up	Cebpz
ENSMUSG00000024145	988	325.625	1270.52	1.96441	0.00102203	0.0128685	Up	Pigf
ENSMUSG00000024146	1184	1104.18	1794.14	0.700761	0.000414192	0.00674947	Up	Cript
ENSMUSG00000024235	2569	124.457	402.902	1.69492	0.000974498	0.0124362	Up	Map3k8
ENSMUSG00000024270	3882	3060.82	5366.06	0.810023	0.00178554	0.0186123	Up	Slc39a6
ENSMUSG00000024276	5472	1639.1	3520.09	1.1028	2.85e-07	2.1e-05	Up	Zfp397
ENSMUSG00000024298	10851	3173.07	6024.47	0.925094	0.000114144	0.00273093	Up	Zfp871
ENSMUSG00000024335	4657	5455.66	15433.3	1.50024	0.00476107	0.034747	Up	Brd2
ENSMUSG00000024338	1907	14.3723	183.106	3.67151	0.000722813	0.00993381	Up	Psmb8
ENSMUSG00000024350	5146	1194.99	2070.81	0.793275	3.31e-09	4.1e-07	Up	Dnajc18
ENSMUSG00000024359	3049	18465.2	33945.5	0.878424	1.57e-07	1.25e-05	Up	Hspa9
ENSMUSG00000024423	3763	3407.86	6974.89	1.03334	2.81e-07	2.08e-05	Up	Impact
ENSMUSG00000024474	2872	4494.94	7728.59	0.781952	0.000604115	0.00872985	Up	Ik
ENSMUSG00000024491	6301	1542.09	2319.07	0.588713	0.000313282	0.00558267	Up	Rbm27
ENSMUSG00000024521	2727	994.595	2537	1.35123	5.25e-22	7.22e-19	Up	Pmaip1
ENSMUSG00000024524	5736	59.5134	562.336	3.24121	0.000414574	0.00674947	Up	Gnal
ENSMUSG00000024580	4038	869.877	2007.3	1.20649	0.00182245	0.0188011	Up	Grpel2
ENSMUSG00000024608	987	7182.52	11169.4	0.637	0.00589676	0.0394324	Up	Rps14
ENSMUSG00000024621	4701	8.42944	148.078	4.13042	0.00051937	0.00782582	Up	Csf1r
ENSMUSG00000024644	2152	718.27	1238.23	0.78599	0.00273073	0.0242366	Up	Cndp2
ENSMUSG00000024683	2981	608.971	1204.98	0.984643	0.000789663	0.0106371	Up	Mrpl16
ENSMUSG00000024732	3745	558.947	1920.14	1.78049	0.0067789	0.0431148	Up	Ccdc86
ENSMUSG00000024750	7385	2382.87	6716.32	1.49509	0.000491791	0.00755086	Up	Zfand5
ENSMUSG00000024764	4520	554.471	1465.89	1.40304	0.00772746	0.0468284	Up	Naa40
ENSMUSG00000024769	5995	1183.67	4246.65	1.84313	0.00459345	0.0340108	Up	Cdc42bpg
ENSMUSG00000024778	1625	379.871	925.892	1.28567	0.00845282	0.0496072	Up	Fas
ENSMUSG00000024790	1442	225.185	1563.74	2.79589	0.00269746	0.0240556	Up	Sac3d1
ENSMUSG00000024818	2599	257.946	593.025	1.20116	0.00179275	0.0186557	Up	Slc25a45
ENSMUSG00000024841	2556	630.15	1069.02	0.763201	0.0056494	0.0386661	Up	Eif1ad
ENSMUSG00000024869	3904	139.118	600.84	2.1107	0.00475229	0.034747	Up	NA
ENSMUSG00000024871	2350	50.5752	277.389	2.4557	0.00250095	0.02306	Up	Doc2g
ENSMUSG00000024901	4110	191.268	1123.21	2.55408	0.000339001	0.00589587	Up	Peli3
ENSMUSG00000024912	1864	88.2848	818.052	3.21182	0.00277141	0.0244217	Up	Fosl1
ENSMUSG00000024957	2537	3.86775	50.2053	3.7214	0.00488633	0.0351943	Up	Kcnk4
ENSMUSG00000024986	3908	17.2463	246.715	3.84498	4.73e-05	0.0013843	Up	Hhex
ENSMUSG00000024999	3977	1034.66	1772.7	0.776794	0.00672746	0.0429664	Up	Noc3l
ENSMUSG00000025010	3819	237.539	647.377	1.44665	0.00819179	0.0484707	Up	Ccnj
ENSMUSG00000025050	2832	464.656	1037.17	1.15903	0.000196723	0.00405137	Up	Pcgf6
ENSMUSG00000025139	3788	3090.51	4906.11	0.666805	0.00240475	0.0225816	Up	Tollip
ENSMUSG00000025209	3488	794.991	3282.16	2.04573	0.000236352	0.00459251	Up	Twnk
ENSMUSG00000025220	5057	3029.64	5479.88	0.855079	3.98e-07	2.79e-05	Up	Oga
ENSMUSG00000025223	3133	1900.45	4663.28	1.29511	0.00819111	0.0484707	Up	Ldb1
ENSMUSG00000025283	1352	2572.12	5867.57	1.18989	3.85e-06	0.000187807	Up	Sat1
ENSMUSG00000025364	2483	5349.76	16333.9	1.61034	0.00492675	0.0353928	Up	Pa2g4
ENSMUSG00000025408	969	558.658	2714.77	2.28082	7.39e-08	6.49e-06	Up	Ddit3
ENSMUSG00000025417	3307	2537.15	5350.83	1.07661	0.00412085	0.0316353	Up	Pip4k2c
ENSMUSG00000025432	3033	20.7962	116.487	2.47514	0.00111135	0.0137243	Up	Avil
ENSMUSG00000025437	4183	2445.29	3825.95	0.64577	0.00017364	0.00371011	Up	Usp33
ENSMUSG00000025489	765	5.34183	55.1961	3.36544	0.00243864	0.0227755	Up	Ifitm5
ENSMUSG00000025498	3240	38.0827	165.66	2.12026	0.00496098	0.0354905	Up	Irf7
ENSMUSG00000025507	3699	53.9684	1037.06	4.26521	0.00040443	0.00662613	Up	Pidd1
ENSMUSG00000025537	2374	14.2762	92.4033	2.69977	0.00581454	0.0392111	Up	Phkg1
ENSMUSG00000025577	3807	302.975	788.922	1.38074	0.00810019	0.0481774	Up	Cbx2
ENSMUSG00000025591	4328	429.119	881.696	1.03897	0.000118482	0.00280061	Up	Tma16
ENSMUSG00000025646	4248	423.648	998.052	1.23628	0.00493397	0.0353969	Up	Atrip
ENSMUSG00000025723	705	6.36861	87.6789	3.79624	0.000119725	0.00281549	Up	Nmb
ENSMUSG00000025784	992	19.2468	55.5452	1.51708	0.00238007	0.0224308	Up	Clec3b
ENSMUSG00000025785	3890	261.688	421.088	0.687318	0.00258716	0.0235436	Up	Exosc7
ENSMUSG00000025912	4980	407.529	4442.31	3.44639	0.001403	0.0160042	Up	Mybl1
ENSMUSG00000025921	3587	802.35	1328.5	0.727809	0.00178064	0.0186123	Up	Rdh10
ENSMUSG00000025956	2666	702.624	1398.88	0.993746	5.37e-05	0.00153059	Up	Mettl21a
ENSMUSG00000025971	4874	401.195	1032.87	1.36439	0.0020238	0.0201895	Up	Maip1
ENSMUSG00000025980	2423	8616.29	16989.3	0.979501	0.00148799	0.0166696	Up	Hspd1
ENSMUSG00000026019	10012	869.925	1517.84	0.80335	0.00139207	0.0159589	Up	Wdr12
ENSMUSG00000026020	9507	2465.2	3752.19	0.605939	0.00209468	0.0205833	Up	Nop58
ENSMUSG00000026034	4865	3436.96	5768.12	0.746849	4.13e-05	0.0012376	Up	Clk1
ENSMUSG00000026035	2139	369.344	705.863	0.934733	0.00592975	0.0395614	Up	Ppil3
ENSMUSG00000026048	4239	1054.31	3519.37	1.73902	0.00144262	0.0163074	Up	Ercc5
ENSMUSG00000026064	4236	656.879	6043.26	3.2015	3.18e-06	0.000159805	Up	Ptp4a1
ENSMUSG00000026107	4790	949.02	4035.89	2.08848	0.00273795	0.0242693	Up	Nabp1
ENSMUSG00000026158	4844	159.724	682.526	2.09544	0.000796977	0.0106915	Up	Ogfrl1
ENSMUSG00000026173	4682	17.7617	254.646	3.84213	0.000686847	0.0095444	Up	Plcd4
ENSMUSG00000026198	3772	550.695	1184.48	1.10513	0.000482185	0.00746166	Up	Abcb6
ENSMUSG00000026205	2059	11.4041	510.02	5.48021	0.00104843	0.0131001	Up	Slc23a3
ENSMUSG00000026234	8202	17864	30354.5	0.764868	0.000153184	0.00339896	Up	Ncl
ENSMUSG00000026238	1216	12190.3	22234.9	0.867126	0.00350171	0.0282092	Up	Ptma
ENSMUSG00000026317	6857	1402.65	4213.9	1.58712	0.000312143	0.00556959	Up	Cln8
ENSMUSG00000026360	3021	10.4779	55.1258	2.39222	0.0030326	0.025721	Up	Rgs2
ENSMUSG00000026374	7063	2759.38	4505	0.707287	0.00566583	0.0386941	Up	Tsn
ENSMUSG00000026409	4505	473.143	750.322	0.66544	0.00544566	0.0377031	Up	Pfkfb2
ENSMUSG00000026455	4990	1003.15	1691.58	0.754369	0.000617206	0.008846	Up	Klhl12
ENSMUSG00000026456	2420	1471.92	2967.72	1.01164	0.000820187	0.0109229	Up	Cyb5r1
ENSMUSG00000026484	3201	1996.52	3035.77	0.604665	2.99e-06	0.000153361	Up	Rnf2
ENSMUSG00000026489	4026	1037.48	2383.08	1.19979	0.00247888	0.0229001	Up	Coq8a
ENSMUSG00000026492	2449	1177.53	1963.25	0.737642	0.0052892	0.0370675	Up	Tfb2m
ENSMUSG00000026510	4361	1115.91	1924.16	0.786316	0.00348759	0.0281565	Up	Trp53bp2
ENSMUSG00000026578	1909	558.27	1112.57	0.995312	0.00542352	0.0375876	Up	Ccdc181
ENSMUSG00000026628	1984	161.354	976.323	2.59755	1e-05	0.00040357	Up	Atf3
ENSMUSG00000026641	2167	1249.24	2281.95	0.869285	0.00484507	0.0350589	Up	Usf1
ENSMUSG00000026659	1875	337.284	697.65	1.04811	0.00236381	0.0223745	Up	Dusp12
ENSMUSG00000026667	7864	3444.48	8197.56	1.25096	0.00075895	0.0103171	Up	Uhmk1
ENSMUSG00000026739	3594	3883.55	7444.48	0.938923	1.26e-07	1.05e-05	Up	Bmi1
ENSMUSG00000026848	4775	652.3	1914.41	1.55334	0.00591519	0.0395026	Up	Tor1b
ENSMUSG00000026869	4397	1581.87	2653.62	0.746464	0.00234141	0.0222912	Up	Psmd5
ENSMUSG00000026918	5419	3003.31	4959.45	0.723731	0.00187326	0.0191459	Up	Brd3
ENSMUSG00000026956	3349	1661.53	4927.15	1.56825	0.000953717	0.0122277	Up	Uap1l1
ENSMUSG00000026958	3017	1018.41	2466.37	1.27629	0.000162594	0.00358462	Up	Dpp7
ENSMUSG00000026977	4972	1810.03	2777.33	0.618063	0.00671642	0.0429158	Up	2020-03-07
ENSMUSG00000027080	2059	1067.05	1601.51	0.586141	0.00367952	0.0291753	Up	Med19
ENSMUSG00000027091	2111	3362.29	5579.93	0.730936	0.000101403	0.00251805	Up	Zc3h15
ENSMUSG00000027164	6169	1142.41	2504.6	1.13275	0.00111834	0.0137422	Up	Traf6
ENSMUSG00000027173	1801	153.346	2065.37	3.75159	0.000221557	0.00439405	Up	Depdc7
ENSMUSG00000027236	5413	3013.7	5168.88	0.778396	0.00212598	0.0207721	Up	Eif3j1
ENSMUSG00000027245	4170	800.477	2177.54	1.44382	0.00817188	0.0484448	Up	Hypk
ENSMUSG00000027284	8046	598.001	1192.43	0.995396	2.53e-05	0.000850276	Up	Cdan1
ENSMUSG00000027286	1962	579.338	2959.88	2.35343	0.000273563	0.00506516	Up	Lrrc57
ENSMUSG00000027324	2706	124.784	976.923	2.96924	8.55e-05	0.00218179	Up	Rpusd2
ENSMUSG00000027381	5036	293.344	1495.72	2.35065	1.87e-21	2.34e-18	Up	Bcl2l11
ENSMUSG00000027387	1624	138.052	261.031	0.918125	0.000116461	0.00275759	Up	Zc3h8
ENSMUSG00000027405	3627	1134.59	4021.87	1.8257	0.00197271	0.0198795	Up	Nop56
ENSMUSG00000027424	2840	325.836	825.961	1.34165	0.000506525	0.00769974	Up	Mgme1
ENSMUSG00000027427	4403	1106.25	1693.15	0.61436	0.000181047	0.00381698	Up	Polr3f
ENSMUSG00000027470	2951	211.979	878.846	2.05182	0.00133029	0.0155092	Up	Mylk2
ENSMUSG00000027472	1299	961.97	2517.89	1.38821	0.00541165	0.0375621	Up	Pdrg1
ENSMUSG00000027510	2281	337.461	1521.16	2.17302	0.00430862	0.0326865	Up	Rbm38
ENSMUSG00000027534	2512	502.078	1559.79	1.63555	0.000326462	0.00573582	Up	Snx16
ENSMUSG00000027569	3150	686.172	2126.09	1.63162	0.00151444	0.0168698	Up	Mrgbp
ENSMUSG00000027610	3258	1587.34	4355.45	1.45627	0.0040678	0.0313505	Up	Gss
ENSMUSG00000027677	9661	2477.34	5200.37	1.07003	0.000785342	0.0105921	Up	Ttc14
ENSMUSG00000027714	2479	866.335	1962.32	1.17966	0.00350381	0.0282092	Up	Exosc9
ENSMUSG00000027775	3011	4108.44	9107.43	1.14852	9.1e-05	0.00230242	Up	Mfsd1
ENSMUSG00000027804	3777	2840.13	5649.52	0.992211	0.00731468	0.0453155	Up	Ppid
ENSMUSG00000027829	4134	1499.92	2643.38	0.817691	0.00109267	0.01353	Up	Ccnl1
ENSMUSG00000027881	3814	2270.14	3935.36	0.793678	1.15e-09	1.64e-07	Up	Prpf38b
ENSMUSG00000027889	4288	897.924	4512.61	2.32932	0.00259104	0.0235436	Up	Ampd2
ENSMUSG00000027905	2905	533.513	1497.72	1.48936	0.00396815	0.0308443	Up	Ddx20
ENSMUSG00000027919	925	2.87796	109.265	5.24723	0.00494462	0.0354102	Up	Lce1g
ENSMUSG00000027932	2487	87.0573	460.001	2.40203	0.00299849	0.0256054	Up	Slc27a3
ENSMUSG00000027937	1101	811.005	1348.66	0.734276	0.00253114	0.0231676	Up	Jtb
ENSMUSG00000027942	2510	327.593	673.921	1.04263	3.85e-06	0.000187807	Up	4933434E20Rik
ENSMUSG00000027950	6399	48.2354	236.317	2.29283	0.00317802	0.0265039	Up	Chrnb2
ENSMUSG00000027981	4679	465.658	754.451	0.697063	0.000177836	0.00378128	Up	Rnpc3
ENSMUSG00000027983	4378	138.823	634.913	2.1933	0.00129108	0.0151937	Up	Cyp2u1
ENSMUSG00000028016	5386	909.926	1770.16	0.960191	0.00288257	0.0250192	Up	Ints12
ENSMUSG00000028060	3636	1460.16	3286.59	1.17059	0.00048114	0.00745388	Up	Khdc4
ENSMUSG00000028086	4473	1211.95	3239.08	1.41835	0.000134566	0.00306494	Up	Fbxw7
ENSMUSG00000028138	3725	2107.23	5252.5	1.31772	0.00315016	0.0263606	Up	Adh5
ENSMUSG00000028140	1657	1090.98	2172.83	0.994109	0.00823851	0.0486425	Up	Mrpl9
ENSMUSG00000028167	3134	173.768	296.943	0.771616	0.000266138	0.0049881	Up	Bdh2
ENSMUSG00000028179	1815	69.8043	391.064	2.48777	4.6e-06	0.000217275	Up	Cth
ENSMUSG00000028211	5432	1403.14	35670.4	4.66801	3.04e-08	3.05e-06	Up	Trp53inp1
ENSMUSG00000028232	2773	463.217	777.989	0.748121	0.00738421	0.0454381	Up	Tmem68
ENSMUSG00000028233	4327	1228.21	2086.53	0.764791	0.00172148	0.0183158	Up	Tgs1
ENSMUSG00000028247	2651	343.842	682.647	0.990484	0.000207347	0.00420718	Up	Coq3
ENSMUSG00000028268	2682	70.2707	581.5	3.04824	0.00317885	0.0265039	Up	Gbp3
ENSMUSG00000028271	3200	1123.24	1735.21	0.627763	0.00762694	0.0464676	Up	Gtf2b
ENSMUSG00000028278	5055	205.807	772.326	1.90745	7.74e-07	5e-05	Up	Rragd
ENSMUSG00000028282	6799	1149.83	1732.17	0.591415	0.00235445	0.0223073	Up	Casp8ap2
ENSMUSG00000028295	935	155.394	266.543	0.779866	0.00794122	0.047483	Up	Smim8
ENSMUSG00000028318	2986	233.852	863.754	1.88524	0.00350857	0.02821	Up	Polr1e
ENSMUSG00000028341	5720	68.9062	189.426	1.45957	0.00167597	0.0179288	Up	Nr4a3
ENSMUSG00000028410	5622	6723.77	10221.4	0.604156	0.00157802	0.0173108	Up	Dnaja1
ENSMUSG00000028466	1884	1319.8	2218.06	0.749018	0.00408224	0.0314266	Up	Creb3
ENSMUSG00000028494	1888	3852.79	9395.12	1.28605	4.35e-06	0.000207885	Up	Plin2
ENSMUSG00000028518	7969	237.415	557.963	1.23325	0.00356063	0.0284988	Up	Prkaa2
ENSMUSG00000028521	4414	526.392	1239.13	1.23514	0.00603481	0.0399234	Up	Slc35d1
ENSMUSG00000028522	4830	2125.64	3860.01	0.860974	0.000223147	0.00441068	Up	Mier1
ENSMUSG00000028551	2471	636.394	1771.34	1.47701	0.00734616	0.04538	Up	Cdkn2c
ENSMUSG00000028630	6129	6743.64	10707.1	0.667021	0.00238022	0.0224308	Up	Dyrk2
ENSMUSG00000028636	1543	179.23	883.29	2.3018	6.91e-05	0.00186107	Up	Ppcs
ENSMUSG00000028646	2950	3785.65	8123.89	1.10171	5.09e-05	0.00146727	Up	Rragc
ENSMUSG00000028669	1700	403.66	1046.8	1.3749	0.00784339	0.047153	Up	Pithd1
ENSMUSG00000028676	3754	2320.83	3526.18	0.603547	0.000218517	0.00438513	Up	Srsf10
ENSMUSG00000028701	5742	284.83	539.555	0.921996	0.00265795	0.0238366	Up	Lurap1
ENSMUSG00000028737	4142	288.503	1413.5	2.29303	0.000625321	0.00889376	Up	Aldh4a1
ENSMUSG00000028803	5153	182.796	325.283	0.831933	0.000252254	0.00483324	Up	Nipal3
ENSMUSG00000028821	1369	1538.03	2589.91	0.751848	0.000831808	0.0110455	Up	Syf2
ENSMUSG00000028841	2468	27.2082	165.935	2.61018	0.000234373	0.00456696	Up	Cnksr1
ENSMUSG00000028850	2004	92.2265	408.336	2.1466	0.00162121	0.0175891	Up	Gpatch3
ENSMUSG00000028860	2484	132.357	800.588	2.59721	0.00222669	0.0215117	Up	Sytl1
ENSMUSG00000028862	4334	176.784	844.422	2.25602	0.00755852	0.0461888	Up	Map3k6
ENSMUSG00000028869	2366	1806.36	3130	0.793158	0.00561126	0.0384624	Up	Gnl2
ENSMUSG00000028878	3053	1882.66	2928.03	0.637353	0.000296107	0.0053463	Up	Fam76a
ENSMUSG00000028882	2037	893.397	3386.65	1.92253	0.00277589	0.0244217	Up	Ppp1r8
ENSMUSG00000028893	3475	456.541	2804.6	2.61905	0.000675132	0.00943882	Up	Sesn2
ENSMUSG00000028953	2569	3647.75	9056.16	1.31193	0.00337937	0.0276233	Up	Abcf2
ENSMUSG00000028954	3862	3536.53	7416.12	1.06841	3.08e-07	2.23e-05	Up	Nub1
ENSMUSG00000028961	3644	3106.56	5045.03	0.699384	4.35e-05	0.00128835	Up	Pgd
ENSMUSG00000028982	1887	92.9682	235.279	1.34198	0.00183645	0.0188508	Up	Slc25a33
ENSMUSG00000028990	1817	544.535	1922.52	1.82003	0.000873094	0.0114283	Up	Lzic
ENSMUSG00000029014	3758	1919.8	4085.53	1.0897	0.000651932	0.00914427	Up	Dnajc2
ENSMUSG00000029019	781	21.9857	162.559	2.88926	0.0077802	0.0469365	Up	Nppb
ENSMUSG00000029027	2093	70.2642	442.851	2.65486	0.000841431	0.0111626	Up	Dffb
ENSMUSG00000029029	3959	265.371	699.867	1.3992	0.004348	0.0329018	Up	Wrap73
ENSMUSG00000029196	3791	964.381	2171.87	1.17134	0.00571177	0.0388034	Up	Tada2b
ENSMUSG00000029212	13737	8.5599	65.5339	2.93566	0.00280247	0.0245484	Up	Gabrb1
ENSMUSG00000029246	4158	757.874	1321.2	0.802004	0.00837928	0.0492623	Up	Ppat
ENSMUSG00000029265	3085	2423.3	6497.69	1.42301	0.00370522	0.0293115	Up	Dr1
ENSMUSG00000029366	3078	398.571	2010.9	2.33491	0.00497388	0.0355273	Up	Dck
ENSMUSG00000029378	1215	22.1864	160.815	2.8588	0.000173177	0.00371011	Up	Areg
ENSMUSG00000029380	1871	43.6335	175.024	2.00292	9.05e-06	0.000372879	Up	Cxcl1
ENSMUSG00000029385	4537	2140.92	4481	1.06579	2.08e-13	7.95e-11	Up	Ccng2
ENSMUSG00000029397	1967	654.433	1115.55	0.770329	0.00297323	0.0255005	Up	Rchy1
ENSMUSG00000029416	2936	856.469	1540.1	0.846653	0.00352798	0.028333	Up	Slc15a4
ENSMUSG00000029434	4235	1719.02	2757.97	0.682089	0.00433324	0.0328442	Up	Vps33a
ENSMUSG00000029463	1388	698.676	3018.08	2.11103	0.00350641	0.0282092	Up	Fam216a
ENSMUSG00000029464	2198	429.684	3066.59	2.83536	5.63e-05	0.00158817	Up	Gpn3
ENSMUSG00000029480	4760	707.501	2203.14	1.63879	0.00471388	0.0346182	Up	Dhx37
ENSMUSG00000029507	1868	521.934	1386.08	1.40911	0.00648694	0.0418382	Up	Pus1
ENSMUSG00000029512	5213	2604.41	7491.26	1.52429	0.00266678	0.0239003	Up	Ulk1
ENSMUSG00000029535	1088	475.795	1606.99	1.75599	0.00348004	0.0281286	Up	Triap1
ENSMUSG00000029607	1774	5.12438	50.091	3.29058	0.000350013	0.00604156	Up	Ankrd61
ENSMUSG00000029627	2243	163.677	567.474	1.79396	0.00032313	0.0056991	Up	Zkscan14
ENSMUSG00000029641	1126	12.0824	480.734	5.31056	1.5e-05	0.00054878	Up	Rasl11a
ENSMUSG00000029657	4764	5075.68	9625.19	0.923278	1.16e-07	9.78e-06	Up	Hsph1
ENSMUSG00000029708	4650	1169.74	3587.27	1.61675	0.00502739	0.0357192	Up	Gcc1
ENSMUSG00000029714	5440	1318.49	3203.07	1.28066	0.00693682	0.0438447	Up	Gigyf1
ENSMUSG00000029726	3128	1274.82	4242.95	1.73484	0.00557328	0.0383358	Up	Mepce
ENSMUSG00000029729	8261	2537.34	4981.63	0.973346	0.00175226	0.0184861	Up	Zkscan1
ENSMUSG00000029730	2962	1182.05	6309.13	2.41616	0.002154	0.0209863	Up	Mcm7
ENSMUSG00000029787	6670	1261.93	2208	0.807533	5.83e-06	0.000259762	Up	Avl9
ENSMUSG00000029816	3701	18.0682	72.2196	1.98536	0.00305254	0.025804	Up	Gpnmb
ENSMUSG00000029922	3046	992.214	1752.96	0.821128	2.13e-05	0.000737394	Up	Mkrn1
ENSMUSG00000030030	2070	101.673	563.411	2.47114	0.00302918	0.0257078	Up	1700003E16Rik
ENSMUSG00000030031	4869	138.172	658.527	2.2532	0.00032906	0.00576672	Up	Kbtbd8
ENSMUSG00000030057	2178	3685.01	7783.81	1.07885	3.45e-10	5.94e-08	Up	Cnbp
ENSMUSG00000030059	5732	2983.65	5944.88	0.994663	1.25e-05	0.000477104	Up	Tmf1
ENSMUSG00000030064	4913	61.6747	236.415	1.94113	0.00263848	0.0237394	Up	Frmd4b
ENSMUSG00000030083	4556	379.319	644.581	0.76619	0.00535052	0.0373072	Up	Abtb1
ENSMUSG00000030145	3683	257.501	425.164	0.724454	0.000479203	0.00744017	Up	Zfp248
ENSMUSG00000030264	3072	1458.6	2660.29	0.867117	0.000218985	0.00438513	Up	Thumpd3
ENSMUSG00000030275	6575	3728.18	7402.81	0.989681	0.0019448	0.0196436	Up	Etnk1
ENSMUSG00000030393	4199	177.819	419.249	1.23867	9.5e-05	0.00238582	Up	Zik1
ENSMUSG00000030407	2710	342.619	1257.74	1.87621	0.00715361	0.0446112	Up	Qpctl
ENSMUSG00000030431	1375	24.788	150.72	2.60108	0.00764835	0.0465529	Up	Tmem238
ENSMUSG00000030469	4494	559.968	1062.85	0.924662	1.68e-07	1.32e-05	Up	Zfp719
ENSMUSG00000030470	2433	414.026	629.861	0.60565	0.00751573	0.0460142	Up	Csrp3
ENSMUSG00000030486	2577	90.0691	187.127	1.05365	0.0080118	0.0477136	Up	Zfp108
ENSMUSG00000030521	2276	1179.33	3065.53	1.37821	0.000417687	0.00677094	Up	Mphosph10
ENSMUSG00000030554	7818	50.5675	832.136	4.04043	7.22e-06	0.000314274	Up	Synm
ENSMUSG00000030609	4956	1111.13	4883.81	2.13605	0.00245918	0.0228819	Up	Aen
ENSMUSG00000030619	2067	660.563	2004.08	1.60128	0.00213373	0.0208182	Up	Eed
ENSMUSG00000030641	3387	156.742	1602.4	3.35388	0.00123142	0.014731	Up	Ddias
ENSMUSG00000030654	2171	1562.23	4541.51	1.53961	0.00243434	0.0227663	Up	Arl6ip1
ENSMUSG00000030744	3183	8050.56	12869.6	0.676809	0.00345414	0.0280346	Up	Rps3
ENSMUSG00000030753	3723	1749.99	3324.38	0.925867	0.000190485	0.00398858	Up	Thap12
ENSMUSG00000030790	1390	81.3149	138.096	0.769052	0.00298706	0.025556	Up	Adm
ENSMUSG00000030870	4849	1105.52	2187.17	0.98446	0.00612851	0.0403397	Up	Ubfd1
ENSMUSG00000030942	2689	1084.93	2033.7	0.906611	0.0050843	0.0360168	Up	Thumpd1
ENSMUSG00000030966	2793	103.564	558.068	2.42999	0.000109971	0.00265884	Up	Trim21
ENSMUSG00000030979	2189	310.433	654.087	1.07611	0.00240855	0.022594	Up	Uros
ENSMUSG00000031016	3419	900.262	1653.83	0.877533	3.34e-06	0.000165787	Up	Wee1
ENSMUSG00000031134	3107	597.847	1131.27	0.920063	0.000321936	0.00569264	Up	Rbmx
ENSMUSG00000031148	3579	1665.07	4399.35	1.40177	0.00385142	0.0302136	Up	Gpkow
ENSMUSG00000031155	2045	99.0541	522.679	2.3995	0.00204192	0.0202767	Up	Pim2
ENSMUSG00000031200	3071	194.92	393.632	1.01674	0.000173072	0.00371011	Up	Mtcp1
ENSMUSG00000031202	3401	91.2185	416.561	2.19126	0.000966948	0.0123513	Up	Rab39b
ENSMUSG00000031266	3172	609.986	1875.26	1.62044	2.08e-06	0.000116204	Up	Gla
ENSMUSG00000031403	2804	912.149	1955.92	1.10064	0.00298913	0.025556	Up	Dkc1
ENSMUSG00000031431	2876	1553.66	2910.95	0.9061	4.28e-06	0.000205129	Up	Tsc22d3
ENSMUSG00000031458	1958	147.863	485.204	1.71475	0.00155228	0.0171523	Up	Coprs
ENSMUSG00000031465	3560	40.2004	113.28	1.50484	0.00260855	0.0236384	Up	Angpt2
ENSMUSG00000031480	4422	5.17111	56.2311	3.44669	0.00182095	0.0188011	Up	Thsd1
ENSMUSG00000031485	5767	1635.23	5723.14	1.80737	0.00279011	0.0244991	Up	Plpbp
ENSMUSG00000031488	7965	367.461	877.327	1.25574	0.00131992	0.0154275	Up	Rab11fip1
ENSMUSG00000031562	2493	89.982	526.558	2.54888	0.00177508	0.0186068	Up	Dctd
ENSMUSG00000031574	4046	192.568	299.587	0.638572	0.00848779	0.049709	Up	Star
ENSMUSG00000031578	1902	1797.45	5896.98	1.71406	0.00398711	0.0309187	Up	Mak16
ENSMUSG00000031609	1178	503.691	1614.59	1.68055	0.00246655	0.0228891	Up	Sap30
ENSMUSG00000031617	2678	3405.03	9168.76	1.4291	0.00223465	0.0215432	Up	Tmem184c
ENSMUSG00000031628	2601	2385.09	5502.39	1.20611	0.00016443	0.00361352	Up	Casp3
ENSMUSG00000031654	2800	2.12243	110.404	5.73427	0.000118729	0.00280163	Up	Cbln1
ENSMUSG00000031711	3585	1998.46	3886.36	0.959693	0.00469123	0.0345489	Up	Zfp330
ENSMUSG00000031762	511	66.2443	6926.21	6.70771	6.74e-77	9.27e-73	Up	Mt2
ENSMUSG00000031765	1085	542.523	8366.6	3.94642	8.15e-45	5.61e-41	Up	Mt1
ENSMUSG00000031774	2873	1854.52	2925.85	0.658023	0.00117716	0.0142429	Up	Fam192a
ENSMUSG00000031775	1926	18.9249	290.405	3.93797	7.85e-05	0.0020418	Up	Pllp
ENSMUSG00000031781	4359	1441.2	2962.87	1.03977	0.00560509	0.0384393	Up	Ciapin1
ENSMUSG00000031812	4138	2874.08	5942.9	1.04789	1.76e-07	1.35e-05	Up	Map1lc3b
ENSMUSG00000031877	2859	9.14798	95.0621	3.36966	0.00306703	0.0258536	Up	Ces2g
ENSMUSG00000031889	2937	607.697	1104.56	0.862715	0.00584618	0.0392705	Up	D230025D16Rik
ENSMUSG00000031910	5912	41.9564	108.854	1.37126	0.00777187	0.0469349	Up	Has3
ENSMUSG00000031913	2178	1370.45	2230.63	0.702971	0.00208092	0.0205181	Up	Vps4a
ENSMUSG00000031917	3036	831.198	1741.6	1.06734	0.00430313	0.0326865	Up	Nip7
ENSMUSG00000031922	2523	619.676	1034.17	0.738777	0.00377335	0.029782	Up	Cep57
ENSMUSG00000031935	3964	1230.93	2863.91	1.21837	0.0036997	0.0292847	Up	Med17
ENSMUSG00000031939	4881	1206.96	2949.45	1.28908	0.00295275	0.0254199	Up	Taf1d
ENSMUSG00000031969	3188	505.178	1650.33	1.70797	0.00293356	0.0253447	Up	Acad8
ENSMUSG00000032057	973	22.879	117.462	2.3577	0.00127041	0.0150794	Up	4833427G06Rik
ENSMUSG00000032068	1689	52.2466	275.699	2.40006	0.000466597	0.00732759	Up	Plet1
ENSMUSG00000032103	2144	328.771	825.05	1.32742	0.000960167	0.0122932	Up	Pus3
ENSMUSG00000032119	5333	746.274	1604.05	1.1041	0.000863647	0.0113767	Up	Hinfp
ENSMUSG00000032122	5943	174.126	502.85	1.53052	8e-07	5.09e-05	Up	Slc37a2
ENSMUSG00000032135	2989	39.1802	425.235	3.44033	0.00602134	0.0398995	Up	Mcam
ENSMUSG00000032251	2158	461.619	967.336	1.06772	0.00202901	0.0201976	Up	Irak1bp1
ENSMUSG00000032262	3001	257.277	582.868	1.18047	0.00483505	0.0350589	Up	Elovl4
ENSMUSG00000032350	3423	1106.51	2906.1	1.39317	9.09e-05	0.00230242	Up	Gclc
ENSMUSG00000032434	3383	1174.83	2190.05	0.898611	0.00483593	0.0350589	Up	Cmtm6
ENSMUSG00000032469	2261	318.67	1257.81	1.9812	0.00820214	0.0485111	Up	Dbr1
ENSMUSG00000032487	4453	1031.65	2618.3	1.34373	0.00720359	0.0448415	Up	Ptgs2
ENSMUSG00000032495	3657	30.4964	121.852	1.99499	0.000106731	0.00259418	Up	Lrrc2
ENSMUSG00000032501	4330	325.941	1823.54	2.48413	0.00323233	0.0267531	Up	Trib1
ENSMUSG00000032508	2458	648.042	2176.35	1.74785	0.00658705	0.0422265	Up	Myd88
ENSMUSG00000032526	2354	125.391	267.486	1.09232	0.000568684	0.00838656	Up	Ss18l2
ENSMUSG00000032540	3157	1835.87	3378.9	0.88023	0.00301512	0.0257078	Up	Abhd5
ENSMUSG00000032577	3729	3.6419	142.436	5.3023	1.5e-06	8.68e-05	Up	Mapkapk3
ENSMUSG00000032578	4697	32.5637	237.502	2.86547	0.00365653	0.0290265	Up	Cish
ENSMUSG00000032607	2082	94.4574	349.829	1.8892	0.00132533	0.0154775	Up	Amt
ENSMUSG00000032633	3567	1323.34	3247.25	1.29499	0.00573702	0.0388981	Up	Flcn
ENSMUSG00000032673	2126	210.96	777.093	1.88144	0.000437943	0.00698121	Up	Prorsd1
ENSMUSG00000032715	2026	148.755	390.576	1.3927	0.00160197	0.0174595	Up	Trib3
ENSMUSG00000032725	1204	2.57679	26.9829	3.38959	0.00116108	0.0140855	Up	Folr2
ENSMUSG00000032727	5279	1302.07	3225.75	1.30893	0.00229433	0.0220014	Up	Mier3
ENSMUSG00000032776	5802	7.18388	127.13	4.13762	2.51e-05	0.000847983	Up	Mctp2
ENSMUSG00000032786	3399	1287.36	2959.1	1.20081	0.00639766	0.0415546	Up	Alas1
ENSMUSG00000032802	2812	627.666	1994.65	1.66738	0.000144408	0.00322998	Up	Srxn1
ENSMUSG00000032840	5649	580.835	1503.97	1.3728	0.000367915	0.00622694	Up	2410131K14Rik
ENSMUSG00000032902	4426	3049.98	6067.46	0.992389	0.00034269	0.00593752	Up	Slc16a1
ENSMUSG00000032942	2448	0.754204	18.2831	4.76897	0.0003058	0.00548487	Up	Ucp3
ENSMUSG00000033044	1108	53.2812	128.2	1.26557	0.00686551	0.0435048	Up	Dhrs7c
ENSMUSG00000033088	7327	903.514	1943.14	1.10492	0.00495388	0.0354581	Up	Triobp
ENSMUSG00000033159	3669	1264.32	3496.04	1.46745	0.000369977	0.00624512	Up	Cnppd1
ENSMUSG00000033233	4612	191.845	400.521	1.06126	0.00196831	0.0198665	Up	Trim45
ENSMUSG00000033285	4002	1494.84	2641.78	0.821616	6.36e-05	0.00174728	Up	Wdr3
ENSMUSG00000033319	5726	1830.12	2887.69	0.658291	0.00189723	0.0193192	Up	Fem1c
ENSMUSG00000033356	2840	240.261	470.284	0.969864	0.00831715	0.0490326	Up	Pus7l
ENSMUSG00000033368	1783	1.31176	27.901	4.42668	0.000374613	0.00630789	Up	Trim69
ENSMUSG00000033446	5400	358.487	4078.31	3.50792	3.92e-05	0.00117976	Up	Lpar6
ENSMUSG00000033450	3076	139.61	785.917	2.49297	0.00140811	0.0160492	Up	Tagap
ENSMUSG00000033460	2413	1110.2	1740.89	0.64883	5.59e-05	0.00157915	Up	Armcx1
ENSMUSG00000033618	8583	78.2845	476.172	2.60492	0.000221667	0.00439405	Up	Map3k13
ENSMUSG00000033658	6612	1028.81	2041.01	0.98846	0.00704399	0.044358	Up	Ddx19b
ENSMUSG00000033707	1904	6.8697	41.2871	2.59725	0.00139754	0.0159743	Up	Lrrc24
ENSMUSG00000033735	3545	487.299	1636.82	1.74848	0.00386537	0.0302136	Up	Spr
ENSMUSG00000033852	5092	55.0926	294.591	2.42054	0.00483696	0.0350589	Up	Gm28042
ENSMUSG00000033883	6689	1077.7	2608.65	1.27548	0.000213723	0.00429852	Up	Zfp267
ENSMUSG00000033904	6948	640.333	2181.57	1.76852	0.00289784	0.0251042	Up	Ccp110
ENSMUSG00000033931	3424	643.073	1478.06	1.20079	0.00174437	0.0184311	Up	Rbm34
ENSMUSG00000033964	8361	2144.97	5592.29	1.38258	0.000173679	0.00371011	Up	Zbtb41
ENSMUSG00000034042	3588	1952.72	3059.51	0.648128	0.00470241	0.0346117	Up	Gpbp1l1
ENSMUSG00000034083	4415	755.125	1330.67	0.817636	0.000261975	0.00493968	Up	Ccdc174
ENSMUSG00000034111	7409	1359.37	2852.32	1.06946	7.83e-05	0.0020418	Up	Tmed8
ENSMUSG00000034117	2644	2.05623	60.7635	4.91617	0.000309852	0.00554777	Up	Ptgdr2
ENSMUSG00000034157	4098	520.332	2296.6	2.14147	0.00135706	0.0157078	Up	Cipc
ENSMUSG00000034173	2492	201.134	638.475	1.66673	0.00640191	0.0415626	Up	Zbed5
ENSMUSG00000034189	3141	559.14	1622.7	1.53716	0.00457143	0.0339574	Up	Hsdl1
ENSMUSG00000034194	1958	505.756	1854.29	1.87447	0.000929098	0.0119678	Up	R3hcc1
ENSMUSG00000034203	3472	388.149	1088.87	1.48843	0.00278276	0.0244616	Up	Chchd4
ENSMUSG00000034209	1110	12.3537	62.7079	2.34752	0.00484846	0.0350589	Up	Rasl10a
ENSMUSG00000034211	5061	677.551	1788.57	1.40058	0.000815957	0.0108876	Up	Mrps17
ENSMUSG00000034226	1703	5.37103	134.982	4.64868	0.00343552	0.0279164	Up	Rhov
ENSMUSG00000034275	16144	64.9157	143.828	1.15046	3.43e-05	0.00106765	Up	Igsf9b
ENSMUSG00000034282	6384	9.33623	130.298	3.79508	0.00189092	0.019282	Up	Evpl
ENSMUSG00000034320	7814	1876.33	3970.48	1.08153	0.000393797	0.00650356	Up	Slc26a2
ENSMUSG00000034333	5425	943.071	1958.53	1.05447	0.00241099	0.022594	Up	Zbed4
ENSMUSG00000034457	4752	4148.41	8750.23	1.07689	1.12e-05	0.000442254	Up	Eda2r
ENSMUSG00000034459	2656	33.6359	506.136	3.91119	4.55e-11	9.49e-09	Up	Ifit1
ENSMUSG00000034460	6817	2019.6	4538.6	1.16827	0.00637542	0.0414297	Up	Six4
ENSMUSG00000034538	2866	83.6631	164.76	0.983478	0.00069401	0.00960693	Up	Zfp418
ENSMUSG00000034617	3861	501.363	1401.64	1.48337	0.000576462	0.00844557	Up	Mtrr
ENSMUSG00000034620	4793	1388.26	2807.19	1.01594	0.00794202	0.047483	Up	Rxylt1
ENSMUSG00000034686	1359	45.1388	453.92	3.3289	0.0033208	0.0272548	Up	Prr7
ENSMUSG00000034818	4391	31.5622	301.059	3.25343	0.00125831	0.0149879	Up	Celf5
ENSMUSG00000034936	1382	68.1707	462.67	2.7632	0.00443832	0.033365	Up	Arl4d
ENSMUSG00000034959	3758	47.1249	111.833	1.239	0.00019734	0.00405195	Up	Rubcnl
ENSMUSG00000035007	3223	906.724	1553.75	0.777465	0.00594336	0.0396137	Up	Rundc1
ENSMUSG00000035112	4117	8.74875	86.9092	3.31439	0.00127532	0.0150931	Up	Wnk4
ENSMUSG00000035125	4192	301.659	527.683	0.807291	0.00322475	0.0267531	Up	Gcfc2
ENSMUSG00000035151	5122	1363.23	2171.02	0.671398	0.00283502	0.0247157	Up	Elmod2
ENSMUSG00000035164	6764	715.067	1097.99	0.619448	0.00279116	0.0244991	Up	Zc3h12c
ENSMUSG00000035173	6445	2751.09	4191.58	0.607436	1.71e-07	1.32e-05	Up	Ccdc186
ENSMUSG00000035234	2182	266.078	569.136	1.09728	0.00400546	0.0310091	Up	Abraxas1
ENSMUSG00000035235	1619	576.157	964.758	0.74378	0.000288181	0.005251	Up	Trim13
ENSMUSG00000035262	1670	8.55723	73.958	3.12164	0.00795454	0.0475372	Up	Amh
ENSMUSG00000035266	3689	295.017	937.892	1.66851	0.00160422	0.0174598	Up	Helq
ENSMUSG00000035295	2699	13.1794	114.234	3.1039	0.000367995	0.00622694	Up	Wdr38
ENSMUSG00000035367	4212	913.499	1911.63	1.06542	0.00738357	0.0454381	Up	Rmi1
ENSMUSG00000035399	1702	557.003	2106.67	1.91927	0.00040459	0.00662613	Up	Oser1
ENSMUSG00000035443	1107	583.071	1988.39	1.76989	0.00381978	0.0300278	Up	Thyn1
ENSMUSG00000035458	912	17.0569	88.0718	2.36447	0.006436	0.0416267	Up	Tnni3
ENSMUSG00000035572	7250	577.756	1044.88	0.855237	0.00143823	0.0162846	Up	Dcaf10
ENSMUSG00000035614	6386	1662.03	2546.93	0.616132	3.14e-06	0.000158889	Up	Togaram1
ENSMUSG00000035692	703	82.7502	389.004	2.23285	0.00297618	0.0255039	Up	Isg15
ENSMUSG00000035711	2377	17.062	183.648	3.42908	0.00019185	0.0039989	Up	Dok3
ENSMUSG00000035759	3047	142.53	329.1	1.20672	0.000272381	0.00505688	Up	Bbs10
ENSMUSG00000035764	4179	756.667	1671.82	1.14393	0.00270296	0.0240677	Up	Fbxo45
ENSMUSG00000035851	6313	2278.53	4450.9	0.96618	0.000417047	0.00677094	Up	Ythdc1
ENSMUSG00000035949	4405	1573.46	2824.29	0.844001	0.000462845	0.00728531	Up	Fbxw2
ENSMUSG00000035953	3232	1135.07	1878.33	0.72725	0.00480989	0.034955	Up	Pip4p1
ENSMUSG00000035958	1957	621.323	2029.94	1.70798	0.00502287	0.0357192	Up	Tdp2
ENSMUSG00000036139	2374	540.616	1264.11	1.22562	0.00708897	0.044367	Up	Hoxc9
ENSMUSG00000036160	2971	548.745	1113.06	1.02079	0.00381505	0.0300078	Up	Surf6
ENSMUSG00000036281	4459	387.768	1101.64	1.50636	0.00488616	0.0351943	Up	Snapc4
ENSMUSG00000036323	3625	4347.61	6937.79	0.674326	7.73e-06	0.000332481	Up	Srp72
ENSMUSG00000036473	7683	887.614	1700.52	0.938522	0.00102241	0.0128685	Up	Tbc1d24
ENSMUSG00000036478	5001	4620.39	12980.4	1.49028	0.000952418	0.0122224	Up	Btg1
ENSMUSG00000036537	1223	62.8322	201.437	1.68195	0.00708408	0.0443668	Up	Rnf113a1
ENSMUSG00000036552	2535	200.824	742.367	1.88602	0.00475148	0.034747	Up	Ermard
ENSMUSG00000036572	2553	1117.08	3530.07	1.66007	0.00193998	0.0196381	Up	Upf3b
ENSMUSG00000036632	2972	880.538	1414.59	0.683963	0.00596705	0.0397524	Up	Alg5
ENSMUSG00000036678	2230	720.728	3903.09	2.43712	0.00339864	0.0277149	Up	Aaas
ENSMUSG00000036693	2702	1644.85	4962.67	1.59318	0.000711929	0.00982076	Up	Nop14
ENSMUSG00000036721	4405	269.744	1054.96	1.96757	0.000166649	0.00363904	Up	Zscan12
ENSMUSG00000036764	3025	62.2817	154.503	1.31426	0.00512151	0.0362427	Up	Dnajc12
ENSMUSG00000036781	575	1335.15	3285.95	1.29937	0.00586973	0.039371	Up	Rps27l
ENSMUSG00000036822	3856	2305.92	5377.87	1.22177	0.00570281	0.0387808	Up	Topors
ENSMUSG00000036894	6793	1013.31	6036.51	2.5747	0.000624682	0.00889376	Up	Rap2b
ENSMUSG00000036941	4971	407.912	791.261	0.955834	1.36e-07	1.12e-05	Up	Elac1
ENSMUSG00000036964	3664	31.5062	353.116	3.48915	6.19e-05	0.00170763	Up	Trim17
ENSMUSG00000036990	7354	7500.68	13600.6	0.858614	0.00414649	0.031779	Up	Otud4
ENSMUSG00000036995	4225	360.976	796.957	1.14335	0.00141884	0.0161204	Up	Asap3
ENSMUSG00000037007	6470	625.028	1132.26	0.856145	1.32e-06	7.75e-05	Up	Zfp113
ENSMUSG00000037017	2964	534.771	1353.6	1.34026	0.000165329	0.00362747	Up	Zscan21
ENSMUSG00000037029	2029	1652.74	3489.99	1.07861	0.00306203	0.0258273	Up	Zfp146
ENSMUSG00000037070	1695	2000.86	6451.56	1.68904	0.00735074	0.0453879	Up	Rbmxl1
ENSMUSG00000037161	1409	58.7548	127.843	1.12228	0.000241228	0.00466092	Up	Mgarp
ENSMUSG00000037266	3051	2486.53	7174.62	1.52873	1.45e-08	1.56e-06	Up	Rsrp1
ENSMUSG00000037316	4876	719.658	1588.99	1.14316	0.00246976	0.0228952	Up	Bag4
ENSMUSG00000037321	3911	55.0538	1362.28	4.62876	3.67e-05	0.00111965	Up	Tap1
ENSMUSG00000037376	4153	790.122	1781.62	1.17322	0.00252394	0.0231407	Up	Trmt6
ENSMUSG00000037434	5244	77.6178	1666.93	4.4254	1.01e-12	3.29e-10	Up	Slc30a1
ENSMUSG00000037509	6514	40.6698	274.917	2.75828	0.001833	0.0188465	Up	Arhgef4
ENSMUSG00000037525	4628	288.524	460.512	0.674272	0.00574604	0.0389187	Up	Bcdin3d
ENSMUSG00000037526	3729	595.086	2252.29	1.92043	0.000173511	0.00371011	Up	Atg14
ENSMUSG00000037531	3364	599.559	1118.72	0.900479	0.00256044	0.0233891	Up	Mrpl47
ENSMUSG00000037573	2288	3624.76	17624.3	2.28162	0.00258797	0.0235436	Up	Tob1
ENSMUSG00000037580	3508	154.738	507.741	1.71455	0.00559698	0.0384393	Up	Gch1
ENSMUSG00000037594	1960	571.86	3149.38	2.46144	0.000358495	0.00612371	Up	Clba1
ENSMUSG00000037638	3478	180.253	455.018	1.33704	0.00789213	0.0473081	Up	Zbtb42
ENSMUSG00000037730	5555	903.086	1445.66	0.679281	0.00493228	0.0353969	Up	Mynn
ENSMUSG00000037855	4259	702.949	5921.46	3.07447	0.000296132	0.0053463	Up	Zfp365
ENSMUSG00000037857	5158	5151.82	9947.54	0.949301	0.00269143	0.0240429	Up	Nufip2
ENSMUSG00000037885	5445	829.167	2719.88	1.71389	0.00470701	0.0346117	Up	Stk35
ENSMUSG00000037958	3114	1412.92	2481.71	0.812759	0.0053675	0.0373121	Up	Nsrp1
ENSMUSG00000038028	3651	339.207	672.784	0.988127	0.00587755	0.0393967	Up	Tigar
ENSMUSG00000038046	1510	205.952	614.031	1.57625	0.0046322	0.0342424	Up	Mrm3
ENSMUSG00000038069	3464	849.4	2183.66	1.36234	0.000812613	0.0108554	Up	Cdkn2aip
ENSMUSG00000038095	10161	3781.35	5785.52	0.613751	1.25e-05	0.000477853	Up	Sbno1
ENSMUSG00000038167	3299	16.3986	113.754	2.80168	0.000812751	0.0108554	Up	Plekhg6
ENSMUSG00000038188	2887	1.96277	34.6623	4.15471	0.000444471	0.00706889	Up	Scarf1
ENSMUSG00000038217	1153	171.481	1245.33	2.8604	0.0013092	0.0153674	Up	Tlcd2
ENSMUSG00000038227	3226	751.843	1280.59	0.767845	1.59e-07	1.27e-05	Up	Hoxa9
ENSMUSG00000038235	2518	754.269	1462.63	0.955674	0.0026195	0.0236753	Up	F11r
ENSMUSG00000038236	2031	811.308	1479.74	0.866876	0.00181942	0.0188011	Up	Hoxa7
ENSMUSG00000038279	2597	1391.11	4284.65	1.62298	0.00847229	0.0496605	Up	Nop2
ENSMUSG00000038280	4387	2792.63	4518.48	0.694396	0.00112669	0.0137899	Up	Ostm1
ENSMUSG00000038295	3902	325.039	4171.24	3.68183	0.000384524	0.00641199	Up	Atg9b
ENSMUSG00000038335	3389	1455.28	3686.32	1.34096	0.00342227	0.0278581	Up	Tsr1
ENSMUSG00000038393	2827	1887.24	7552.16	2.00073	0.000351234	0.00605505	Up	Txnip
ENSMUSG00000038412	2232	461.522	881.337	0.933757	0.000233615	0.00455863	Up	Higd1a
ENSMUSG00000038485	7131	1871.67	3078.7	0.718125	0.00582381	0.0392306	Up	Socs7
ENSMUSG00000038508	1545	154.547	891.531	2.5284	0.0013419	0.0155905	Up	Gdf15
ENSMUSG00000038528	3542	7.39806	42.7419	2.53464	0.00215927	0.0210227	Up	Mfsd4b5
ENSMUSG00000038544	3237	485.556	1353.42	1.47902	0.0018016	0.0187194	Up	Inip
ENSMUSG00000038550	1939	73.3163	340.113	2.21633	0.00043152	0.00693508	Up	Ciart
ENSMUSG00000038555	1926	34.6518	280.83	3.01708	0.0035386	0.0283764	Up	Reep2
ENSMUSG00000038560	3621	105.993	1654.89	3.96467	0.000428395	0.0068929	Up	Sp6
ENSMUSG00000038605	2164	40.6537	262.766	2.69156	0.00428128	0.0325581	Up	Samd10
ENSMUSG00000038628	2948	899.314	1545.9	0.781098	2.94e-05	0.000949063	Up	Polr3k
ENSMUSG00000038633	2048	2713.36	6056.32	1.1584	5.21e-06	0.000243623	Up	Degs1
ENSMUSG00000038712	3548	1030.44	1694.42	0.717549	5.67e-05	0.00159476	Up	Mindy1
ENSMUSG00000038776	1741	2970.94	5205.17	0.809092	6.02e-06	0.000267265	Up	Ephx1
ENSMUSG00000038806	3213	1438.23	4501.05	1.64602	0.0010171	0.0128305	Up	Sde2
ENSMUSG00000038827	4360	854.95	1955.13	1.19357	0.00833027	0.049079	Up	Abitram
ENSMUSG00000038845	1799	946.297	1746.73	0.884355	0.00139354	0.0159625	Up	Phb
ENSMUSG00000038880	1884	456.702	761.668	0.738257	0.00680722	0.0432489	Up	Mrps34
ENSMUSG00000038888	2475	169.357	498.046	1.55675	0.0064143	0.0415699	Up	Ctu1
ENSMUSG00000038894	6323	882.713	3739.37	2.08281	0.00350548	0.0282092	Up	Irs2
ENSMUSG00000039086	4343	289.065	643.733	1.15527	0.000229876	0.00451129	Up	Ss18l1
ENSMUSG00000039157	5935	642.633	1615.85	1.33052	0.00293551	0.0253447	Up	Fam102a
ENSMUSG00000039238	3232	1.57594	1478.05	9.86816	8.14e-09	9.25e-07	Up	Zfp750
ENSMUSG00000039328	3998	509.787	776.084	0.606681	0.00559609	0.0384393	Up	Rnf122
ENSMUSG00000039347	1789	180.612	584.958	1.69592	0.000470655	0.00738289	Up	Atp6v0e2
ENSMUSG00000039382	1609	570.327	970.167	0.766544	0.00260742	0.0236384	Up	Wdr45
ENSMUSG00000039395	2284	51.2561	613.118	3.58065	2.51e-06	0.000135486	Up	Mreg
ENSMUSG00000039450	914	83.2222	991.675	3.57424	0.000172081	0.00371011	Up	Dcxr
ENSMUSG00000039462	3130	32.2332	170.415	2.40624	0.00208606	0.0205426	Up	Col10a1
ENSMUSG00000039473	6455	3037.56	5018.25	0.724475	9.81e-06	0.000396976	Up	Ubn1
ENSMUSG00000039512	8634	899.724	1461.56	0.700222	0.00124266	0.0148525	Up	Uhrf1bp1
ENSMUSG00000039518	2678	25.7977	68.7481	1.42153	0.00156919	0.0172521	Up	Cdsn
ENSMUSG00000039531	5512	442.643	789.101	0.835142	0.000132911	0.00303226	Up	Zup1
ENSMUSG00000039633	3930	309.985	613.692	0.986631	0.00326434	0.0268953	Up	Lonrf1
ENSMUSG00000039634	2965	420.033	635.434	0.598488	0.00190461	0.0193514	Up	Zfp189
ENSMUSG00000039756	2429	2338.75	7287.5	1.63975	0.00131784	0.0154252	Up	Dnttip2
ENSMUSG00000039804	3179	846.933	1280.64	0.596743	0.00275894	0.0244217	Up	Ncoa5
ENSMUSG00000039813	4315	80.0844	564.561	2.81787	0.000116062	0.00275759	Up	Tbc1d2
ENSMUSG00000039879	5098	1519.9	2465.74	0.698416	6.6e-05	0.00179571	Up	Heca
ENSMUSG00000039960	3371	715.434	1825.99	1.35194	0.00319124	0.026575	Up	Rhou
ENSMUSG00000039968	7651	1322.18	2403.14	0.862218	3.09e-06	0.00015811	Up	Rsbn1l
ENSMUSG00000040033	4397	847.907	1319.75	0.637859	0.00136258	0.0157522	Up	Stat2
ENSMUSG00000040102	6267	1102.96	3056.49	1.4706	0.0026838	0.0240082	Up	Klhl42
ENSMUSG00000040105	2859	118.364	440.697	1.89693	0.0018117	0.0187677	Up	Plpp6
ENSMUSG00000040112	4607	465.284	961.364	1.04732	0.00411494	0.0316076	Up	Mrps35
ENSMUSG00000040128	1648	1281.7	3389.97	1.40327	0.00034184	0.00593025	Up	Pnrc1
ENSMUSG00000040177	6773	418.041	1167.04	1.48126	0.00732207	0.0453155	Up	2310057M21Rik
ENSMUSG00000040181	3106	106.032	245.761	1.21025	4.67e-07	3.24e-05	Up	Fmo1
ENSMUSG00000040302	2368	260.536	537.077	1.04479	0.000388431	0.00646149	Up	Rbm48
ENSMUSG00000040321	4300	832.121	2537.45	1.60871	0.000626868	0.00889971	Up	Zfp770
ENSMUSG00000040331	2834	681.437	1265.32	0.893171	2.45e-05	0.000831653	Up	Nsmce4a
ENSMUSG00000040350	3876	344.157	2401.46	2.80285	0.000435203	0.00695801	Up	Trim7
ENSMUSG00000040396	5191	2025.98	4346.61	1.10141	0.00014463	0.00322998	Up	Abhd13
ENSMUSG00000040429	2413	173.025	540.828	1.64502	0.000135072	0.00307138	Up	Mterf1a
ENSMUSG00000040435	2809	901.956	3334.02	1.88625	0.00157008	0.0172521	Up	Ppp1r15a
ENSMUSG00000040557	2808	131.582	362.588	1.45915	0.00134714	0.0156261	Up	Mettl27
ENSMUSG00000040596	8692	320.333	576.493	0.847829	0.00451536	0.0337522	Up	Pogk
ENSMUSG00000040703	3161	3.27453	24.3254	2.90444	0.00767798	0.0466546	Up	Cyp2s1
ENSMUSG00000040713	2317	2016.47	3418.92	0.761815	0.00611141	0.0402849	Up	Creg1
ENSMUSG00000040746	2250	422.343	748.851	0.826585	0.00163738	0.0177366	Up	Rnf167
ENSMUSG00000040918	3571	286.719	3473.34	3.59869	0.000104167	0.00256356	Up	Slc19a2
ENSMUSG00000040969	6541	1.50841	21.9769	3.94827	0.00706843	0.0443657	Up	Arhgef38
ENSMUSG00000041075	4532	2547.17	6038.95	1.24545	0.00397372	0.0308502	Up	Fzd7
ENSMUSG00000041096	2804	1651.34	3038.08	0.879532	0.000248369	0.00477209	Up	Tspyl2
ENSMUSG00000041124	2800	3127.71	4790.66	0.615255	0.00475227	0.034747	Up	Msantd4
ENSMUSG00000041132	1905	95.5918	208.417	1.1259	4.92e-05	0.00142693	Up	N4bp2l1
ENSMUSG00000041153	3432	575.148	1180.07	1.03732	0.000984984	0.0125004	Up	Osgin2
ENSMUSG00000041161	1668	281.134	826.652	1.55618	0.00436558	0.0329804	Up	Otud3
ENSMUSG00000041168	4362	2991.6	4729.61	0.660921	0.000120442	0.00282281	Up	Lonp1
ENSMUSG00000041278	1965	1507.03	2816	0.902129	0.00243808	0.0227755	Up	Ttc1
ENSMUSG00000041328	5995	2048.94	5100.22	1.31576	0.00163286	0.0177016	Up	Pcf11
ENSMUSG00000041329	3751	14.6014	71.0906	2.28276	0.00822406	0.0486198	Up	Atp1b2
ENSMUSG00000041346	1891	201.933	1003.59	2.31306	0.000717784	0.00987456	Up	Wrap53
ENSMUSG00000041438	3113	1063.79	2616.51	1.29851	0.00570225	0.0387808	Up	Utp4
ENSMUSG00000041488	3068	505.537	1104.79	1.12802	0.00451682	0.0337522	Up	Stx3
ENSMUSG00000041548	1816	2916.35	7641.46	1.3897	0.00166339	0.0178636	Up	Hspb8
ENSMUSG00000041623	2196	443.459	972.548	1.13342	0.00315985	0.0263935	Up	D11Wsu47e
ENSMUSG00000041747	4120	745.615	1994.67	1.41991	0.00141904	0.0161204	Up	Utp15
ENSMUSG00000041773	4737	2958.76	16120.6	2.44586	0.00246744	0.0228891	Up	Enc1
ENSMUSG00000041777	2821	1495.89	2317.58	0.631545	0.00772859	0.0468284	Up	Cir1
ENSMUSG00000041837	2419	360.383	574.376	0.673231	0.00682509	0.0433085	Up	Pdcd7
ENSMUSG00000041954	1189	19.1955	91.361	2.25172	0.00738578	0.0454381	Up	Tnfrsf18
ENSMUSG00000042063	4779	1916.98	3046.94	0.668535	6.38e-07	4.18e-05	Up	Zfp386
ENSMUSG00000042106	1025	34.3136	571.355	4.05731	0.000192174	0.00399961	Up	Inka1
ENSMUSG00000042156	4577	709.515	2465.89	1.79737	0.00125658	0.0149879	Up	Dzip1
ENSMUSG00000042354	2264	1634.17	5515.8	1.75506	0.000522705	0.00786745	Up	Gnl3
ENSMUSG00000042369	1898	667.2	1535.54	1.20263	0.00789183	0.0473081	Up	Rbm45
ENSMUSG00000042417	2478	18.9333	420.408	4.47252	5.85e-05	0.00162718	Up	Ccno
ENSMUSG00000042558	1826	320.703	1133.17	1.82134	0.00239579	0.0225283	Up	Adprhl2
ENSMUSG00000042589	8784	4.47337	179.766	5.32752	5.55e-06	0.000249309	Up	Cux2
ENSMUSG00000042595	8299	648.163	2522.04	1.96033	0.000111481	0.00268589	Up	Fam199x
ENSMUSG00000042606	2766	367.878	1279.34	1.7983	0.00567311	0.0387128	Up	Hirip3
ENSMUSG00000042650	5730	5832.92	8752.86	0.585664	2.09e-05	0.000725476	Up	Alkbh5
ENSMUSG00000042672	2342	9.19338	42.223	2.19552	0.0011034	0.0136388	Up	Dcst1
ENSMUSG00000042717	6965	34.0026	99.2171	1.54874	0.00246331	0.0228819	Up	Ppp1r3a
ENSMUSG00000042726	3083	1013.5	3797.11	1.90558	0.00136757	0.0157833	Up	Trafd1
ENSMUSG00000042797	5798	6.64252	41.9331	2.66977	0.00728257	0.0451852	Up	Aqp11
ENSMUSG00000042854	4426	117.701	366.252	1.63885	0.00578584	0.0390367	Up	Trp53rkb
ENSMUSG00000042997	5047	1023.55	2219.59	1.11687	0.0021782	0.0211621	Up	Nhlrc3
ENSMUSG00000043061	2971	628.107	1079.2	0.781042	0.00237956	0.0224308	Up	Tmem18
ENSMUSG00000043243	2834	70.377	212.01	1.59152	0.004339	0.0328698	Up	Fam129c
ENSMUSG00000043398	3150	13.167	405.858	4.94357	2.65e-05	0.000875687	Up	Gpr135
ENSMUSG00000043419	2081	51.4826	229.866	2.15895	0.00017246	0.00371011	Up	Rnf227
ENSMUSG00000043421	982	185.797	818.475	2.13961	0.00200281	0.0200528	Up	Hilpda
ENSMUSG00000043424	2379	1454.77	2769.31	0.928929	3.28e-06	0.000164082	Up	Eif3j2
ENSMUSG00000043448	2187	4.88613	102.013	4.39964	0.00181976	0.0188011	Up	Gjc2
ENSMUSG00000043602	2061	93.2352	377.222	2.0166	0.000115942	0.00275759	Up	Zfp3
ENSMUSG00000043881	4526	459.289	1042.03	1.18234	0.000601464	0.00870067	Up	Kbtbd7
ENSMUSG00000043999	2926	5.56901	34.4355	2.61912	0.0070601	0.0443657	Up	Gpr75
ENSMUSG00000044041	1654	10.2007	878.685	6.4309	1.29e-06	7.64e-05	Up	Krt13
ENSMUSG00000044068	4492	1226.32	4792.91	1.96652	0.000184267	0.00387608	Up	Zrsr1
ENSMUSG00000044086	2215	2546.41	6578.52	1.3693	1.48e-07	1.19e-05	Up	Lmod3
ENSMUSG00000044149	3268	583.39	1535.58	1.39638	0.0036924	0.0292437	Up	Nkrf
ENSMUSG00000044197	4264	467.769	1314.58	1.49107	5.57e-05	0.00157565	Up	Gpr146
ENSMUSG00000044313	3558	12.4938	201.383	4.01322	0.000739198	0.0101085	Up	Mab21l3
ENSMUSG00000044350	2444	258.552	618.222	1.25834	0.0032649	0.0268953	Up	Lacc1
ENSMUSG00000044452	6693	1571.26	2825.47	0.846694	0.00516575	0.0364624	Up	Zfp507
ENSMUSG00000044465	10853	604.687	1381.26	1.192	0.00533487	0.0372736	Up	Fam160a2
ENSMUSG00000044566	3449	56.2337	130.436	1.21757	0.00159625	0.017456	Up	Cage1
ENSMUSG00000044595	2057	13.1865	110.543	3.06383	0.000399672	0.00656904	Up	Dnd1
ENSMUSG00000044617	5960	703.218	3692.56	2.39264	0.000221545	0.00439405	Up	Zbtb39
ENSMUSG00000044636	4375	665.155	4998.78	2.90982	0.000138595	0.00312054	Up	Csrnp2
ENSMUSG00000044700	4631	434.329	1193.74	1.45877	0.00342526	0.027866	Up	Tmem201
ENSMUSG00000044763	3002	1063.76	3765.92	1.82392	0.00100626	0.0127402	Up	Trmt10c
ENSMUSG00000044816	2180	0.377102	50.9632	7.19222	0.00130094	0.0152967	Up	D630023F18Rik
ENSMUSG00000044854	1272	16.0442	145.46	3.18228	0.00320292	0.0266562	Up	1700056E22Rik
ENSMUSG00000044934	3532	819.729	1340.93	0.71032	0.00494313	0.0354102	Up	Zfp367
ENSMUSG00000044982	2727	196.827	1018.48	2.37168	0.00150431	0.0167977	Up	Sft2d3
ENSMUSG00000044986	2633	63.0102	222.225	1.81742	0.0010312	0.0129436	Up	Tst
ENSMUSG00000045005	6915	629.775	7912.26	3.65118	3.76e-05	0.00113779	Up	Fzd5
ENSMUSG00000045064	4482	230.013	849.341	1.88511	0.00198892	0.0199428	Up	Zc2hc1c
ENSMUSG00000045140	2675	241.106	516.763	1.10045	0.00346697	0.0280749	Up	Pigw
ENSMUSG00000045193	1321	588.982	1343.92	1.19054	0.00704531	0.044358	Up	Cirbp
ENSMUSG00000045210	9749	3653.08	7165.92	0.972111	0.000235225	0.00457707	Up	Vcpip1
ENSMUSG00000045237	1094	678.121	2177.23	1.68301	0.000332747	0.00580914	Up	1110012L19Rik
ENSMUSG00000045251	2732	93.8916	448.776	2.25916	0.00149178	0.0166985	Up	Zfp688
ENSMUSG00000045275	3162	20.2171	84.5745	2.06305	0.00302578	0.0257078	Up	Lca5l
ENSMUSG00000045316	1473	137.318	976.948	2.83098	0.000126715	0.00293472	Up	Fahd1
ENSMUSG00000045382	1805	357.812	980.164	1.45365	0.000577555	0.00844663	Up	Cxcr4
ENSMUSG00000045409	4718	477.079	1151.74	1.27182	0.00130807	0.0153673	Up	Trim39
ENSMUSG00000045466	2823	129.949	217.916	0.747203	0.0062076	0.0406464	Up	Zfp956
ENSMUSG00000045598	3342	479.761	3190.14	2.73331	0.000170866	0.00370174	Up	Zfp553
ENSMUSG00000045639	6120	666.08	1169.46	0.811493	1.02e-06	6.34e-05	Up	Zfp629
ENSMUSG00000045730	2144	482.706	6586.33	3.77024	5.4e-05	0.0015356	Up	Adrb2
ENSMUSG00000045757	2508	171.377	315.499	0.880112	0.00767507	0.0466546	Up	Zfp764
ENSMUSG00000045795	3069	213.661	883.541	2.04833	0.00119099	0.0143471	Up	Whamm
ENSMUSG00000045973	4438	1675.11	2902.21	0.793246	0.0038648	0.0302136	Up	Slc25a51
ENSMUSG00000046010	1591	835.775	1945.39	1.21901	0.00261007	0.0236384	Up	Zfp830
ENSMUSG00000046056	2460	15.8204	180.588	3.50607	0.00010646	0.00259216	Up	Sbsn
ENSMUSG00000046062	5594	3250.19	8254.79	1.34474	0.00657733	0.0421838	Up	Ppp1r15b
ENSMUSG00000046185	4113	721.423	1171.18	0.699466	0.00389814	0.0304178	Up	Zfp84
ENSMUSG00000046311	4029	282.816	999.994	1.82291	0.00578475	0.0390367	Up	Zfp62
ENSMUSG00000046408	1291	6.26409	105.059	4.08965	4.52e-05	0.00133148	Up	1700067K01Rik
ENSMUSG00000046441	3545	283.322	857.988	1.59923	0.00293665	0.0253447	Up	Cmtr2
ENSMUSG00000046447	4444	130.163	338.458	1.3797	0.00197514	0.0198795	Up	Camk2n1
ENSMUSG00000046675	3367	374.599	1152.2	1.62129	0.000299326	0.00538983	Up	Tmem251
ENSMUSG00000046711	2001	362.259	1096.96	1.59848	0.00755892	0.0461888	Up	Hmga1
ENSMUSG00000046785	7149	1914.38	8066.99	2.0752	9.44e-06	0.000384349	Up	Epm2aip1
ENSMUSG00000046794	4386	109.266	429.908	1.97656	0.00065207	0.00914427	Up	Ppp1r3b
ENSMUSG00000046806	3681	491.903	1480.42	1.58964	0.000872172	0.0114283	Up	Cyren
ENSMUSG00000046818	2722	201.714	2252.21	3.48111	1.19e-05	0.000463407	Up	Ddit4l
ENSMUSG00000046879	3832	1486.01	5699.68	1.93945	0.00456317	0.0339421	Up	Irgm1
ENSMUSG00000046994	11294	443.918	2817.48	2.66609	0.000171557	0.00371011	Up	Mars2
ENSMUSG00000047003	8270	443.935	885.373	0.99639	1.26e-06	7.52e-05	Up	Zfp41
ENSMUSG00000047036	6189	3059.86	5108.25	0.739447	1.15e-05	0.000450678	Up	Zfp445
ENSMUSG00000047044	1677	518.106	1411.05	1.44571	0.0062313	0.0407433	Up	D030056L22Rik
ENSMUSG00000047139	1816	76.8963	2026.76	4.71974	2.55e-05	0.000850276	Up	Cd24a
ENSMUSG00000047146	14369	228.23	543.403	1.25433	5.43e-06	0.00024852	Up	Tet1
ENSMUSG00000047215	2690	5119.61	10129.9	0.984542	0.000131817	0.00301731	Up	Rpl9
ENSMUSG00000047246	2506	18.1374	204.036	3.49618	5.52e-06	0.000249309	Up	Hist1h2be
ENSMUSG00000047388	4877	570.961	1680.95	1.55798	0.00346459	0.0280749	Up	Atmin
ENSMUSG00000047420	1606	163.937	430.318	1.39391	1.71e-05	0.000615649	Up	Fam180a
ENSMUSG00000047514	3086	2581.92	6017.24	1.22071	0.00277596	0.0244217	Up	Tspyl1
ENSMUSG00000047539	4925	2318.42	3560.65	0.619144	0.00611926	0.0403174	Up	Fbxo28
ENSMUSG00000047604	2161	34.7679	233.435	2.74681	0.00247966	0.0229001	Up	Frat2
ENSMUSG00000047632	1772	31.2512	1714.66	5.77903	4.26e-07	2.97e-05	Up	Fgfbp3
ENSMUSG00000047648	5060	2093.98	4952.76	1.24209	0.000391689	0.00648474	Up	Fbxo30
ENSMUSG00000047654	1335	7.85109	42.6877	2.45056	0.00647535	0.041783	Up	Tssk6
ENSMUSG00000047710	4013	1530.19	3490.41	1.18981	0.00773382	0.0468284	Up	Champ1
ENSMUSG00000047746	5137	129.145	290.763	1.16827	2.76e-06	0.000143988	Up	Fbxo40
ENSMUSG00000047945	1605	803.721	8646.66	3.42737	0.000266892	0.00499542	Up	Marcksl1
ENSMUSG00000047963	1985	1082.09	1738	0.68302	0.000366511	0.00621713	Up	Stbd1
ENSMUSG00000048007	1421	255.276	641.195	1.32922	0.00458957	0.0340108	Up	Timm8a1
ENSMUSG00000048047	5122	1454.18	3184	1.13084	0.0020172	0.0201676	Up	Zbtb33
ENSMUSG00000048109	5967	930.89	2900.56	1.63974	0.00188632	0.0192509	Up	Rbm15
ENSMUSG00000048222	3362	2339.15	3656.38	0.644103	3.14e-06	0.000158889	Up	Mfap1b
ENSMUSG00000048279	14991	2008.42	4518.98	1.17006	0.00494217	0.0354102	Up	Sacs
ENSMUSG00000048351	3714	207.409	451.175	1.12258	0.00127509	0.0150931	Up	Coa7
ENSMUSG00000048379	6877	2764.54	4947.43	0.839809	0.000381418	0.00638341	Up	Socs4
ENSMUSG00000048458	4701	250.309	4008.81	4.00156	9.26e-06	0.000379078	Up	Inka2
ENSMUSG00000048540	3943	2.16916	48.9866	4.55056	0.000485423	0.0074865	Up	Nhlh2
ENSMUSG00000048581	1640	277.297	441.73	0.671711	0.0032964	0.0270738	Up	E130311K13Rik
ENSMUSG00000048707	2787	282.346	1063.65	1.91366	0.00701705	0.0442842	Up	Tprn
ENSMUSG00000048732	2393	426.709	2447.85	2.52031	9.06e-05	0.00230006	Up	Klhl11
ENSMUSG00000048827	6606	26.8869	80.8674	1.59034	0.00394788	0.0307363	Up	Pkd1l3
ENSMUSG00000048878	3495	3001.48	9234.57	1.62139	0.0018269	0.0188119	Up	Hexim1
ENSMUSG00000049090	3430	1444.82	3076.84	1.09072	0.000412622	0.00674161	Up	Zadh2
ENSMUSG00000049300	3059	502.148	1842.96	1.8759	0.00240285	0.0225792	Up	Prmt6
ENSMUSG00000049323	7391	3112.26	12859.8	2.04686	0.000625802	0.00889376	Up	Smcr8
ENSMUSG00000049401	2449	1016.89	2498.97	1.29728	0.00766994	0.0466469	Up	Ogfr
ENSMUSG00000049422	1488	57.5911	179.846	1.63669	1.06e-09	1.57e-07	Up	Chchd10
ENSMUSG00000049502	5309	930.27	1989.36	1.09686	0.00296704	0.025487	Up	Dtx3l
ENSMUSG00000049504	4472	788.935	2047.12	1.37581	0.00542341	0.0375876	Up	Proser1
ENSMUSG00000049516	5223	2030.11	4908.53	1.27382	0.00246002	0.0228819	Up	Spty2d1
ENSMUSG00000049551	2293	17.9532	141.719	2.97929	0.0067574	0.0430438	Up	Fzd9
ENSMUSG00000049565	5166	42.9779	183.806	2.09774	0.0033954	0.0277049	Up	Aknad1
ENSMUSG00000049657	4708	466.52	1467.15	1.65328	0.000475661	0.00744017	Up	Zbtb5
ENSMUSG00000049717	5028	1096.07	2763.59	1.33437	0.00172715	0.0183299	Up	Lig4
ENSMUSG00000049892	1611	2.70724	202.71	6.2372	0.00105572	0.0131673	Up	Rasd1
ENSMUSG00000049950	1042	174.127	527.828	1.59994	0.00200426	0.0200528	Up	Rpp38
ENSMUSG00000049957	2778	526.541	2343.01	2.15387	0.0016613	0.017855	Up	Ccdc137
ENSMUSG00000049969	2977	510.409	1280.12	1.32667	0.00271281	0.0241242	Up	Plekhf2
ENSMUSG00000050043	2282	1593.96	2827.44	0.826955	0.00568533	0.0387193	Up	Tmx2
ENSMUSG00000050148	3344	1759.5	4341.78	1.3032	0.00575381	0.0389352	Up	Ubqln2
ENSMUSG00000050229	7554	1191.88	3749.21	1.65345	0.00113145	0.013819	Up	Pigm
ENSMUSG00000050304	1369	2.0757	35.083	4.10731	0.00405762	0.0312897	Up	Slc25a2
ENSMUSG00000050359	806	10.1248	91.836	3.18671	0.000260513	0.00493313	Up	Sprr1a
ENSMUSG00000050394	2120	247.781	561.136	1.17926	0.00277644	0.0244217	Up	Armcx6
ENSMUSG00000050471	3476	647.821	1020.17	0.654905	6.51e-06	0.000287985	Up	Fam118b
ENSMUSG00000050565	6118	1749.46	3217.6	0.879126	3.03e-05	0.00097007	Up	Tor1aip2
ENSMUSG00000050619	5072	752.456	2699.66	1.84315	0.000392165	0.00648474	Up	Zscan29
ENSMUSG00000050675	2710	20.5721	169.025	3.04125	0.000197314	0.00405195	Up	Gp1ba
ENSMUSG00000050708	968	12279.6	28787.7	1.2292	7.58e-05	0.00199645	Up	Ftl1
ENSMUSG00000050714	5267	561.72	1888.79	1.74985	3.14e-05	0.0010014	Up	Zbtb26
ENSMUSG00000050737	3647	5.79159	151.392	4.71949	0.000513089	0.0077652	Up	Ptges
ENSMUSG00000050747	1843	3.50171	25.0404	2.83664	0.00641448	0.0415699	Up	Trim15
ENSMUSG00000050846	2486	742.06	2007.8	1.436	0.00479861	0.0348913	Up	Zfp623
ENSMUSG00000050890	4686	337.423	834.596	1.30665	0.00490988	0.035327	Up	Pdik1l
ENSMUSG00000050914	927	53.2242	168.955	1.66567	0.00703762	0.0443502	Up	Ankrd37
ENSMUSG00000051316	3302	248.849	803.718	1.69164	0.00200179	0.0200528	Up	Taf7
ENSMUSG00000051346	1583	360.622	1138.94	1.65941	0.00734491	0.04538	Up	Spryd4
ENSMUSG00000051396	4314	88.2784	330.209	1.90193	0.00028719	0.00523989	Up	Hspa14
ENSMUSG00000051413	5571	585.544	1911.03	1.70655	0.00208818	0.0205426	Up	Plagl2
ENSMUSG00000051439	1641	346.509	1363.55	1.97657	0.000531111	0.00792461	Up	Cd14
ENSMUSG00000051469	5732	2080.08	3450.8	0.730416	0.00177836	0.0186068	Up	Zfp24
ENSMUSG00000051499	3191	11.7312	109.103	3.21548	5.07e-05	0.00146497	Up	Zfp786
ENSMUSG00000051502	1037	38.0917	348.191	3.19232	0.00144703	0.0163438	Up	Ufsp1
ENSMUSG00000051510	4923	2826.04	6381.32	1.17513	0.00377813	0.0298026	Up	Mafg
ENSMUSG00000051515	2003	5.11465	71.9452	3.81499	0.000390436	0.00647916	Up	Fam181b
ENSMUSG00000051518	838	427.459	1402.91	1.71447	0.00517798	0.0364926	Up	Rps19bp1
ENSMUSG00000051615	4191	1382.9	3503.7	1.34125	0.00350581	0.0282092	Up	Rap2a
ENSMUSG00000051675	3194	825.76	2502.88	1.59992	0.00398929	0.0309187	Up	Trim32
ENSMUSG00000051726	4789	160.86	673.88	2.06716	0.00536133	0.0373121	Up	Kcnf1
ENSMUSG00000052031	2312	586.078	2938.74	2.326	0.000253331	0.00483537	Up	Tagap1
ENSMUSG00000052102	2289	333.295	1125.46	1.75558	0.00454566	0.0338574	Up	Gnpda1
ENSMUSG00000052131	1281	2.67158	28.3141	3.36424	0.00180973	0.0187639	Up	Akr1b7
ENSMUSG00000052137	3327	661.221	1156.98	0.808173	0.00033238	0.00580914	Up	Rbm12b2
ENSMUSG00000052180	1327	8.32298	122.318	3.8782	0.000277415	0.00512043	Up	Serpinb6c
ENSMUSG00000052253	4485	2870.99	5184.72	0.85279	0.00170269	0.018144	Up	Zfp622
ENSMUSG00000052293	1962	70.8522	493.917	2.80053	0.000705986	0.00975125	Up	Taf9
ENSMUSG00000052456	1256	4464.31	9170.08	1.03853	0.0045448	0.0338574	Up	Asna1
ENSMUSG00000052565	7425	23.03	390.698	4.08972	6.67e-06	0.000291917	Up	Hist1h1d
ENSMUSG00000052566	3080	479.158	1360.94	1.50612	0.00533759	0.0372737	Up	Hook2
ENSMUSG00000052684	3189	3815.85	12074	1.66185	0.00716878	0.0446652	Up	Jun
ENSMUSG00000052751	3145	157.292	494.29	1.65186	0.0068025	0.0432449	Up	Repin1
ENSMUSG00000053178	1368	128.779	277.427	1.11057	0.000488929	0.0075153	Up	Mterf1b
ENSMUSG00000053470	4853	2329.52	4550.16	0.965862	1.35e-12	4.33e-10	Up	Kdm3a
ENSMUSG00000053536	4233	1904.16	3837.83	1.01123	0.00447768	0.0335875	Up	Cstf2t
ENSMUSG00000053574	2606	28.6563	111.844	1.96245	0.00202266	0.0201895	Up	4930563E22Rik
ENSMUSG00000053581	3169	1328.41	3973.42	1.58072	0.00204432	0.0202767	Up	Zfand2a
ENSMUSG00000053600	2376	160.843	278.689	0.790752	0.00661627	0.0423757	Up	Zfp472
ENSMUSG00000053604	3644	435.787	687.516	0.657688	0.0055233	0.0380491	Up	Rpia
ENSMUSG00000054079	3196	1336.4	2899.2	1.11742	0.0015792	0.0173108	Up	Utp18
ENSMUSG00000054206	1287	18.4672	166.826	3.17736	0.00025342	0.00483537	Up	Gzmm
ENSMUSG00000054517	4040	215.15	443.426	1.04303	0.0017373	0.0183965	Up	Trim65
ENSMUSG00000054519	3412	497	780.363	0.651496	0.0031644	0.0264155	Up	Zfp867
ENSMUSG00000054604	4425	4110.12	7698.91	0.905552	0.00164529	0.0177663	Up	Cggbp1
ENSMUSG00000054619	1946	599.788	1085.83	0.856377	0.000333187	0.00580945	Up	Mettl7a1
ENSMUSG00000054648	6080	674.655	1518.62	1.17121	0.00362957	0.0288958	Up	Zfp869
ENSMUSG00000054766	2834	6856.03	11039.7	0.687297	0.00235404	0.0223073	Up	Set
ENSMUSG00000054770	5016	557.834	1002.85	0.846213	0.00651457	0.0419377	Up	Kctd18
ENSMUSG00000054855	2203	138.169	2267.42	4.03649	0.000175681	0.00374125	Up	Rnd1
ENSMUSG00000055202	3536	12.0727	82.7404	2.77184	0.00323439	0.0267531	Up	Zfp811
ENSMUSG00000055435	6360	1205.55	2240.66	0.894491	9.44e-06	0.000384349	Up	Maf
ENSMUSG00000055612	2424	168.903	1014.61	2.58649	3.36e-05	0.00104955	Up	Cdca7
ENSMUSG00000055675	6973	730.663	6212.57	3.08805	2.25e-08	2.32e-06	Up	Kbtbd11
ENSMUSG00000055991	3794	573.966	1339.8	1.22323	0.000355178	0.0060925	Up	Zkscan5
ENSMUSG00000056204	4883	1354.46	3364.77	1.31294	0.00574833	0.0389187	Up	Pgpep1
ENSMUSG00000056313	1805	462.51	2275.74	2.29883	0.00262102	0.0236753	Up	Tcim
ENSMUSG00000056429	5013	6217.68	13419.2	1.10988	0.00298925	0.025556	Up	Tgoln1
ENSMUSG00000056537	7439	4588.24	8056.03	0.812217	0.000426055	0.00688142	Up	Rlim
ENSMUSG00000056656	2801	28.1084	955.2	5.08775	2.57e-05	0.00085657	Up	Apol8
ENSMUSG00000056718	747	11.939	49.2168	2.0398	0.00308096	0.0259234	Up	NA
ENSMUSG00000057113	1633	8495.55	13699.9	0.689427	0.000257213	0.00489776	Up	Npm1
ENSMUSG00000057130	4078	1035.98	1702.64	0.716721	0.0013186	0.0154252	Up	Txnl4a
ENSMUSG00000057137	3268	1101.54	3368.89	1.61268	8.46e-05	0.00216716	Up	Tmem140
ENSMUSG00000057156	5609	329.993	1241.42	1.91185	0.00128844	0.0151755	Up	Homez
ENSMUSG00000057219	2260	198.867	607.982	1.61222	0.000946678	0.0121714	Up	Armc7
ENSMUSG00000057367	3331	1624.97	3069.38	0.917746	3.01e-05	0.000968451	Up	Birc2
ENSMUSG00000057421	4625	1266.5	2639.65	1.05964	0.00208209	0.0205181	Up	Las1l
ENSMUSG00000057469	3018	663.593	1170.52	0.819146	0.00716779	0.0446652	Up	E2f6
ENSMUSG00000057497	1643	646.743	1278.18	0.982738	3.53e-05	0.00109057	Up	Fam136a
ENSMUSG00000057506	885	332.576	1576.13	2.24468	0.00160072	0.0174595	Up	Bloc1s2
ENSMUSG00000057706	3355	345.454	1441.87	2.06165	0.000268296	0.00501358	Up	Mex3b
ENSMUSG00000057894	6727	453.73	878.967	0.954858	0.00587929	0.0393967	Up	Zfp329
ENSMUSG00000057895	2010	66.5405	141.889	1.08813	0.00159827	0.0174595	Up	Zfp105
ENSMUSG00000058093	4835	385.511	729.16	0.919244	1.29e-09	1.78e-07	Up	Zfp729b
ENSMUSG00000058135	1289	592.807	1619.19	1.44857	4.98e-16	2.95e-13	Up	Gstm1
ENSMUSG00000058385	618	99.0638	282.046	1.50923	0.00145322	0.0164002	Up	Hist1h2bg
ENSMUSG00000058396	3954	20.4767	254.936	3.64023	1.76e-05	0.000629024	Up	Gpr182
ENSMUSG00000058407	3472	2120.79	3556.42	0.745918	0.00444638	0.0334074	Up	Txndc9
ENSMUSG00000058486	2682	477.263	1831.88	1.94061	0.00533194	0.0372736	Up	Wdr91
ENSMUSG00000058706	4605	516.679	2098.39	2.02199	1.28e-05	0.000485653	Up	0610030E20Rik
ENSMUSG00000058748	2364	480.603	1356.91	1.49763	0.000129164	0.0029814	Up	Zfp958
ENSMUSG00000058761	7147	632.256	1983.66	1.64988	9.95e-05	0.00248053	Up	Rnf169
ENSMUSG00000059334	2347	1.40522	42.4213	4.9787	0.000109754	0.00265824	Up	Zfp36l3
ENSMUSG00000059409	3038	2328.47	7748.95	1.73464	0.00676148	0.0430438	Up	Ppp2r5d
ENSMUSG00000059479	5756	34.5175	154.79	2.16246	0.00690199	0.0436953	Up	B3gnt8
ENSMUSG00000059486	3868	2006.52	3674.19	0.872813	0.000508653	0.00772003	Up	Kbtbd2
ENSMUSG00000059820	3339	780.987	1879.02	1.26668	0.00202881	0.0201976	Up	Nkapd1
ENSMUSG00000059839	3744	583.132	2537.86	2.12186	6.84e-05	0.00184588	Up	Zfp874b
ENSMUSG00000059895	6459	1172.51	6998.74	2.5775	0.002034	0.020218	Up	Ptp4a3
ENSMUSG00000059897	3001	609.732	1220.12	1.00064	0.00114651	0.013958	Up	Zfp930
ENSMUSG00000060032	1831	255.728	3555.67	3.79745	2.65e-05	0.000874704	Up	H2afj
ENSMUSG00000060181	3489	1300.48	4375.14	1.75032	0.000555913	0.00823218	Up	Slc35e3
ENSMUSG00000060548	4051	39.551	219.555	2.46375	3.67e-10	6.23e-08	Up	Tnfrsf19
ENSMUSG00000060639	727	26.2113	397.777	3.92108	2.68e-06	0.000142059	Up	Hist1h4i
ENSMUSG00000060733	5447	449.54	995.778	1.14782	0.00740412	0.0454725	Up	Ipmk
ENSMUSG00000060981	470	8.86301	86.1405	3.278	0.000413932	0.00674947	Up	Hist1h4h
ENSMUSG00000061039	5711	29.2184	144.697	2.30808	0.00424424	0.0323479	Up	Olfr920
ENSMUSG00000061559	3372	838.236	2897.81	1.78968	0.000975721	0.0124402	Up	Wdr61
ENSMUSG00000061613	1046	1290.08	2102.59	0.704832	0.00641989	0.0415699	Up	U2af1
ENSMUSG00000061666	2336	612.581	1382.57	1.17455	2.79e-13	1.01e-10	Up	Gdpd1
ENSMUSG00000061898	3480	344.855	585.154	0.763651	0.00499232	0.03557	Up	Rbak
ENSMUSG00000062077	1434	725.116	1499.06	1.04774	0.000263126	0.00493968	Up	Trim54
ENSMUSG00000062101	2078	172.709	537.813	1.63905	0.00164183	0.0177663	Up	Zfp119b
ENSMUSG00000062175	2900	224.254	398.669	0.832423	0.00599311	0.0398029	Up	Tgif2
ENSMUSG00000062382	938	166.445	346.058	1.05498	0.00250635	0.0230851	Up	LOC100862446
ENSMUSG00000062519	8328	612.527	2182.42	1.83338	0.000114711	0.00273636	Up	Zfp398
ENSMUSG00000062727	476	41.7226	102.893	1.30553	0.0023171	0.0221384	Up	Hist1h2bk
ENSMUSG00000062762	2309	1715.61	6865.36	2.00065	4.23e-05	0.001261	Up	Ei24
ENSMUSG00000062822	3406	239.881	609.092	1.34447	0.000368581	0.0062292	Up	4833420G17Rik
ENSMUSG00000062901	8172	4428.15	8215.74	0.891777	1.43e-06	8.36e-05	Up	Klhl24
ENSMUSG00000063108	11276	1047.53	1592.51	0.604587	0.0012088	0.0144982	Up	Zfp26
ENSMUSG00000063253	1791	1360.18	3331.01	1.29225	7.65e-05	0.00200528	Up	Scoc
ENSMUSG00000063268	3407	640.801	5002.43	2.96471	0.000617297	0.008846	Up	Parp10
ENSMUSG00000063281	3040	894.47	2161.93	1.27323	0.000819263	0.0109211	Up	Zfp35
ENSMUSG00000063362	4960	779.893	1647.57	1.0792	0.00576767	0.0389714	Up	Alg11
ENSMUSG00000063894	8805	1079.98	2223.9	1.0421	6.64e-09	7.81e-07	Up	Zkscan8
ENSMUSG00000063953	3218	461.571	1063.13	1.20406	0.0028202	0.0246333	Up	Amd2
ENSMUSG00000063954	528	148.717	396.797	1.41792	0.00368271	0.0291838	Up	Hist2h2aa2
ENSMUSG00000064037	4679	548.671	927.886	0.758284	0.00383957	0.030149	Up	Gpn1
ENSMUSG00000064177	891	11.0789	49.5032	2.16784	0.00067159	0.00939885	Up	Ghrl
ENSMUSG00000064307	949	37.1552	123.745	1.73681	0.0064598	0.0417243	Up	Lrrc51
ENSMUSG00000064326	1317	232.389	751.583	1.6936	0.00585975	0.0393232	Up	Siva1
ENSMUSG00000066148	5223	738.844	1467.02	0.989747	0.00597813	0.0397779	Up	Prpf4
ENSMUSG00000066880	2920	1122.02	3015.97	1.42673	0.000425919	0.00688142	Up	Zfp617
ENSMUSG00000067206	3198	4.49283	26.3275	2.55177	0.00335613	0.0274986	Up	Lrrc66
ENSMUSG00000067279	2725	69.1611	327.124	2.24373	4.89e-05	0.00142268	Up	Ppp1r3c
ENSMUSG00000067424	6440	463.646	774.905	0.742561	7.82e-05	0.0020418	Up	Zfp563
ENSMUSG00000067430	3407	268.326	629.461	1.22936	3.9e-08	3.78e-06	Up	Zfp763
ENSMUSG00000067455	774	1.40522	37.6167	4.80123	0.000357541	0.00611777	Up	Hist1h4j
ENSMUSG00000067786	1448	11.1172	209.484	4.23489	1.56e-05	0.000567761	Up	Nnat
ENSMUSG00000067787	2108	617.171	3439.38	2.47849	0.000478321	0.00744017	Up	Blcap
ENSMUSG00000067928	4209	380.149	1514.58	1.99477	1.04e-05	0.000415188	Up	Zfp760
ENSMUSG00000067942	3800	1395.73	2448.92	0.811328	0.00117549	0.0142429	Up	Zfp160
ENSMUSG00000068290	1238	1520.43	2503.27	0.719437	0.00366054	0.0290416	Up	Ddrgk1
ENSMUSG00000068299	3019	12.9398	75.4085	2.5396	0.000212465	0.00427947	Up	Nat8f4
ENSMUSG00000068479	4198	3100.72	5081.16	0.712669	0.000620963	0.00888763	Up	Mfap1a
ENSMUSG00000068735	2899	7.72843	78.0662	3.3384	0.00427756	0.0325478	Up	Trp53i11
ENSMUSG00000068744	2020	146.75	1961.52	3.74083	0.000118957	0.0028022	Up	Psrc1
ENSMUSG00000068854	2620	43.0661	502.123	3.54571	8.14e-09	9.25e-07	Up	Hist2h2be
ENSMUSG00000068882	2088	7261.67	11108.5	0.613331	0.00142372	0.0161531	Up	Ssb
ENSMUSG00000068966	6602	436.03	914.32	1.06855	0.00277411	0.0244217	Up	Zbtb34
ENSMUSG00000069114	7414	680.518	1425.22	1.06701	2.83e-05	0.000920419	Up	Zbtb10
ENSMUSG00000069206	4040	389.988	839.516	1.1062	0.00154977	0.0171523	Up	Zfp874a
ENSMUSG00000069300	463	14.1951	48.1169	1.75773	0.00263666	0.0237394	Up	Hist1h2bj
ENSMUSG00000069302	405	2.13349	37.2825	4.10469	0.00147288	0.016544	Up	Hist1h2ah
ENSMUSG00000069303	2197	41.6194	286.108	2.78175	0.00252484	0.0231407	Up	Hist1h2br
ENSMUSG00000069305	430	6.48154	123.649	4.26511	0.000437064	0.00697527	Up	Hist1h4n
ENSMUSG00000069306	402	3.95147	60.1678	3.95535	0.00456758	0.0339471	Up	Hist1h4m
ENSMUSG00000069307	2015	83.991	278.736	1.73184	0.000579896	0.00845984	Up	Hist1h2bq
ENSMUSG00000069308	621	1.02812	135.54	7.07948	3.25e-05	0.00102951	Up	Hist1h2bp
ENSMUSG00000069844	2637	451.184	823.37	0.868199	0.00525505	0.0369034	Up	Sco1
ENSMUSG00000069919	699	26.9356	220.623	3.03413	0.00818122	0.0484605	Up	Hba-a1
ENSMUSG00000070287	1590	14.1535	169.156	3.58413	3.74e-05	0.00113267	Up	Slc35g2
ENSMUSG00000070385	2913	21.0524	147.647	2.81277	0.00463077	0.0342424	Up	Ampd1
ENSMUSG00000070583	1380	80.4756	236.672	1.5583	0.00703359	0.0443451	Up	Fv1
ENSMUSG00000070687	2904	7.55258	33.7544	2.13492	0.00323596	0.0267531	Up	Htr1d
ENSMUSG00000070697	1629	1920.8	6427.31	1.74255	0.00280497	0.0245484	Up	Utp3
ENSMUSG00000070705	1751	214.091	543.969	1.34566	0.00219907	0.021342	Up	Eid2b
ENSMUSG00000070709	5158	359.094	679.66	0.920121	0.000360587	0.00613176	Up	Zfp974
ENSMUSG00000070923	4174	3046.45	4848.73	0.670609	0.00265602	0.0238349	Up	Klhl9
ENSMUSG00000071054	3628	2960.48	5438.42	0.877333	0.00307434	0.0258994	Up	Safb
ENSMUSG00000071072	2000	4159.92	8312.65	0.998792	0.000448657	0.00712722	Up	Ptges3
ENSMUSG00000071103	2740	37.6244	208.016	2.46921	3.62e-05	0.00110873	Up	1700029J07Rik
ENSMUSG00000071256	2686	270.322	1126.1	2.05853	0.00487239	0.0351308	Up	Zfp213
ENSMUSG00000071267	3265	694.025	1124.32	0.696574	7.53e-06	0.000326524	Up	Zfp942
ENSMUSG00000071281	3957	563.176	1169.51	1.05458	5.28e-11	1.07e-08	Up	Zfp65
ENSMUSG00000071291	2391	222.1	500.71	1.17085	0.00197538	0.0198795	Up	Zfp58
ENSMUSG00000071478	572	9.42056	70.8443	2.9059	0.00104954	0.0131021	Up	Hist1h2ad
ENSMUSG00000071533	2295	3624.5	6045.34	0.738133	0.00146779	0.0165376	Up	Pcnp
ENSMUSG00000071537	3413	102.429	547.401	2.41782	0.00075838	0.0103171	Up	Klrg2
ENSMUSG00000071656	2583	103.251	173.226	0.743515	0.00708024	0.0443668	Up	Lrrn4cl
ENSMUSG00000071658	1643	8.9824	60.7488	2.76591	0.00741287	0.045481	Up	Gng3
ENSMUSG00000071722	4173	361.407	1302.37	1.84979	0.00209792	0.0206004	Up	Spin4
ENSMUSG00000071723	2491	242.878	384.334	0.663992	0.00741334	0.045481	Up	Gspt2
ENSMUSG00000072437	3928	38.6695	1379.23	5.15564	1.7e-06	9.68e-05	Up	Nanos1
ENSMUSG00000072620	1664	39.1491	89.7077	1.19386	0.0025158	0.0230886	Up	Slfn2
ENSMUSG00000072762	2001	235.161	598.075	1.34658	0.000951427	0.0122211	Up	4930522L14Rik
ENSMUSG00000072770	1883	36.5295	190.668	2.38137	0.000415234	0.00675222	Up	Acrbp
ENSMUSG00000072915	4100	126.957	510.654	2.01109	5.15e-16	2.95e-13	Up	Gm12258
ENSMUSG00000072919	1626	6.27648	48.9158	2.95552	0.000310313	0.00554777	Up	Noxred1
ENSMUSG00000072949	2613	37.9574	144.407	1.9282	0.00412776	0.0316707	Up	Acot1
ENSMUSG00000072969	2779	316.195	519.718	0.716876	0.000180425	0.00381277	Up	Armcx5
ENSMUSG00000073700	3986	1644.19	6375.31	1.95514	0.00190058	0.0193365	Up	Klhl21
ENSMUSG00000074158	4868	258.124	401.405	0.635554	0.00302067	0.0257078	Up	Zfp976
ENSMUSG00000074203	721	22.4908	63.8066	1.50315	0.00324516	0.0267969	Up	NA
ENSMUSG00000074211	2490	164.487	983.029	2.57933	0.0028727	0.0249493	Up	Sdhaf1
ENSMUSG00000074264	1985	49.3622	106.289	1.10153	0.00205957	0.0203816	Up	Amy1
ENSMUSG00000074340	2616	32.9166	354.089	3.42865	0.000392186	0.00648474	Up	Ovgp1
ENSMUSG00000074480	5778	921.316	1883.18	1.03165	0.00464689	0.0343141	Up	Mex3a
ENSMUSG00000074486	471	13.0619	1055.88	6.33472	1.33e-06	7.76e-05	Up	Bglap2
ENSMUSG00000074622	3363	18.4913	109.503	2.56168	0.000143171	0.00320782	Up	Mafb
ENSMUSG00000074634	4531	107.152	225.493	1.0744	4.54e-05	0.00133484	Up	Tmem267
ENSMUSG00000074646	2429	6.9067	30.4554	2.15844	0.000476122	0.00744017	Up	6430550D23Rik
ENSMUSG00000074652	6163	175.794	383.87	1.1275	0.00449185	0.0336466	Up	Myh7b
ENSMUSG00000074743	3723	874.84	1669.47	0.932927	2.38e-08	2.45e-06	Up	Thbd
ENSMUSG00000074748	3566	2381.55	6799.08	1.51345	0.000349559	0.00604131	Up	Atxn7l3b
ENSMUSG00000074794	4132	751.731	3744.93	2.31682	1.32e-06	7.75e-05	Up	Arrdc3
ENSMUSG00000074796	3196	45.0003	1807.47	5.32872	1.09e-06	6.67e-05	Up	Slc4a11
ENSMUSG00000074818	3265	46.834	158.661	1.76361	0.000553473	0.00821372	Up	Pdzd7
ENSMUSG00000074824	5249	2.11269	23.1014	3.52075	0.000382055	0.00638631	Up	Rslcan18
ENSMUSG00000074862	2785	50.8738	121.211	1.2566	0.00112001	0.0137422	Up	BC025920
ENSMUSG00000074909	4575	944.665	3547.13	1.90892	6.59e-06	0.000290435	Up	Ranbp6
ENSMUSG00000075054	8744	1287.03	2693.97	1.06585	0.00104051	0.0130486	Up	Yae1d1
ENSMUSG00000075232	3206	2403.56	5826.17	1.27742	0.00378426	0.0298168	Up	Amd1
ENSMUSG00000075307	2529	6844.16	12194.3	0.833295	0.000884971	0.0115289	Up	Klhl41
ENSMUSG00000075419	2104	422.904	1133.48	1.42253	0.0033669	0.0275541	Up	Dolk
ENSMUSG00000076431	4795	8032.49	15642.8	0.961642	1.17e-06	7.08e-05	Up	Sox4
ENSMUSG00000076434	1619	3.43552	25.0399	2.8482	0.000159761	0.00352781	Up	Wfdc3
ENSMUSG00000078201	854	84.2824	442.061	2.39179	0.00185941	0.0190327	Up	Tmem203
ENSMUSG00000078202	2582	29.2385	500.317	4.09692	0.000285225	0.00521095	Up	Nrarp
ENSMUSG00000078234	7807	1.47275	167.456	6.79328	2.18e-05	0.000751483	Up	Klhdc7a
ENSMUSG00000078249	1626	907.857	2843.71	1.64726	0.00565334	0.0386738	Up	Hmga1b
ENSMUSG00000078317	2505	69.3208	402.416	2.53832	0.00232127	0.0221608	Up	F8a
ENSMUSG00000078651	2543	43.8069	563.514	3.68405	0.000106435	0.00259216	Up	Aoc2
ENSMUSG00000078768	1709	73.2048	177.994	1.28406	0.00798237	0.0476366	Up	Zfp566
ENSMUSG00000078776	7922	18.2006	528.239	4.85494	3.29e-05	0.00103453	Up	9530053A07Rik
ENSMUSG00000078779	3437	244.733	506.596	1.05164	0.00728508	0.0451852	Up	Zfp59
ENSMUSG00000078813	2222	375.463	1383.42	1.88172	0.00128264	0.0151331	Up	Leng1
ENSMUSG00000078851	2146	241.794	1003.46	2.05361	3.12e-06	0.000158889	Up	Hist3h2a
ENSMUSG00000078853	2022	81.4047	333.906	2.03597	0.00543669	0.0376599	Up	Igtp
ENSMUSG00000078866	1569	427.118	666.572	0.64345	0.000209689	0.00424219	Up	Zfp970
ENSMUSG00000078875	1749	147.557	371.549	1.33284	2.04e-06	0.000115123	Up	Gm2004
ENSMUSG00000078877	2505	439.426	913.689	1.05609	0.0001914	0.00399559	Up	Gm14295
ENSMUSG00000078898	1480	52.4448	202.348	1.9428	6.28e-05	0.00172852	Up	Zfp968
ENSMUSG00000078902	4516	118.251	742.671	2.65021	0.00260386	0.0236384	Up	NA
ENSMUSG00000078922	2823	19.0124	164.939	3.12114	0.00166952	0.0178802	Up	Tgtp1
ENSMUSG00000079065	5409	640.785	1386.53	1.11373	6.69e-05	0.00181533	Up	BC005561
ENSMUSG00000079083	3223	594.085	1313.8	1.14544	3.3e-06	0.000164276	Up	Jrkl
ENSMUSG00000079184	2939	2572.92	4003.14	0.637553	8.56e-06	0.000357814	Up	Mphosph8
ENSMUSG00000079260	2921	126.37	520.11	2.04172	0.000845274	0.0111919	Up	Tmppe
ENSMUSG00000079355	2698	2.98115	106.036	5.17022	1.26e-06	7.52e-05	Up	Ackr4
ENSMUSG00000079605	3432	448.349	1232.5	1.45946	0.00137179	0.0158187	Up	Zbtb9
ENSMUSG00000079710	2253	10.853	96.1769	3.14758	7.97e-05	0.00206923	Up	Gm3448
ENSMUSG00000081058	1020	75.4546	188.206	1.31906	0.000586073	0.00851384	Up	Hist2h3c2
ENSMUSG00000083282	2093	313.305	940.553	1.58618	0.00628464	0.0410141	Up	Ctsf
ENSMUSG00000086598	3052	0.754204	43.9997	5.97342	0.000764319	0.0103618	Up	Btbd18
ENSMUSG00000086965	865	22.187	371.981	4.06858	9.7e-05	0.00242282	Up	NA
ENSMUSG00000087385	1909	35.2807	360.076	3.34992	1.03e-05	0.000411265	Up	Frg2f1
ENSMUSG00000089756	2939	237.826	509.593	1.10036	0.00234671	0.0223073	Up	Zfp966
ENSMUSG00000089774	10913	2024.12	8444.42	2.06085	2.3e-18	2.11e-15	Up	Slc5a3
ENSMUSG00000089857	3152	158.621	410.808	1.37267	1.22e-05	0.000471923	Up	Zfp882
ENSMUSG00000089901	2721	131.843	287.926	1.12746	2.19e-05	0.000751483	Up	NA
ENSMUSG00000090015	2417	283.426	737.515	1.38019	0.00203266	0.020218	Up	Gm15446
ENSMUSG00000090077	1959	56.8899	167.85	1.56027	5.07e-05	0.00146497	Up	Lime1
ENSMUSG00000090877	2803	2207.42	3885.45	0.815848	0.00346727	0.0280749	Up	Hspa1b
ENSMUSG00000091405	1630	19.128	532.399	4.80022	3.17e-08	3.16e-06	Up	Hist2h4
ENSMUSG00000091735	1977	8.19253	145.785	4.15083	0.000572344	0.00840314	Up	Gpr62
ENSMUSG00000091764	4333	173.804	502.232	1.5317	0.000158734	0.00351078	Up	Zfp964
ENSMUSG00000091780	1250	110.977	524.115	2.23846	0.00771406	0.0468118	Up	Sco2
ENSMUSG00000091931	1152	97.8434	466.156	2.25291	0.00161918	0.017581	Up	Gon7
ENSMUSG00000092260	2291	142.647	312.914	1.13205	0.00484969	0.0350589	Up	Zfp963
ENSMUSG00000092558	5680	820.255	1299.97	0.664633	0.00614452	0.0403678	Up	Med20
ENSMUSG00000093769	1825	191.707	660.29	1.78536	1.34e-09	1.82e-07	Up	Hist2h3c1
ENSMUSG00000094271	968	2.4074	19.9553	3.01982	0.00632584	0.0412243	Up	Gm13290
ENSMUSG00000094441	3544	916.741	1883.62	1.03914	8.14e-06	0.000345546	Up	Zfp955a
ENSMUSG00000094475	1497	100.571	237.629	1.23568	0.000772551	0.0104503	Up	NA
ENSMUSG00000095101	1462	14.4677	104.769	2.85725	0.00361122	0.0288164	Up	Gm13285
ENSMUSG00000095315	2159	192.803	348.602	0.855751	0.00400265	0.0310048	Up	NA
ENSMUSG00000095432	5293	481.282	1003.33	1.06046	0.00088197	0.0115116	Up	Zfp748
ENSMUSG00000095545	1458	154.996	379.783	1.29514	0.000262419	0.00493968	Up	Zfp969
ENSMUSG00000095648	1749	204.974	395.064	0.947276	0.00227194	0.0218873	Up	NA
[truncated: 127 more rows]

## Sheet: Common changed gene of D2HG
Names	total	elements	Gene ID	Gene Symbol	Synonyms	Type of Gene	Description	Gene Summary	Gene Location	Biological Process (GO)	GOSlim (Ontology)	Cellular Component (GO)	Molecular Function (GO)	Kinase Class (UniProt)	Protein Function (Protein Atlas)	InterPro	Subcellular Location (Protein Atlas)	Secreted (UniProt)	Secreted (Protein Altas)	Transmembrane (UniProt)	Membrane (Protein Altas)	Plasma (Protein Altas)	Appris (Ensembl)	Transmembrane (TMHMM)	JAX	Orphanet	OMIM	Pathogenic LoF (ClinVar)	dbGap (NCBI)	GWAS (NHGRI-EBI)	Developmental Disorders (DDG2P)	Variations (Ensembl)	Human Phenotype Ontology (HPO)	Drug (DrugBank)	Disease and gene associations (DisGeNET)	Gene RIF (NCBI)	Pubmed Count	Isoforms ID Map	Tissue Specificity (TiGER)	RNA Tissue Category (Protein Atlas)	Protein Expression Normal (Protein Atlas)	Protein Expression Cancer (Protein Atlas)	Canonical Pathways	KEGG Pathway	KEGG Functional Set	KEGG Structural Complex	Hallmark Gene Sets	BioCarta Gene Sets
Down gene of D2HG-vs-NTC UP gene of D2HG-vs-NTC(2nd)	2	Nppb	4879	NPPB	BNP	protein-coding	natriuretic peptide B	This gene is a member of the natriuretic peptide family and encodes a secreted protein which functions as a cardiac hormone. The protein undergoes two cleavage events, one within the cell and a second after secretion into the blood. The protein's biological actions include natriuresis, diuresis, vasorelaxation, inhibition of renin and aldosterone secretion, and a key role in cardiovascular homeos…	chr1:11858945-11857464	GO:0007168 receptor guanylyl cyclase signaling pathway;GO:0006182 cGMP biosynthetic process;GO:0035810 positive regulation of urine volume	[GO:0005575] cellular_component; [GO:0005576] extracellular region; [GO:0003674] molecular_function; [GO:0005615] extracellular space; [GO:0005622] intracellular; [GO:0043226] organelle; [GO:0005634] nucleus; [GO:0005737] cytoplasm; [GO:0008150] biological_process; [GO:0048856] anatomical structure development; [GO:0048646] anatomical structure formation involved in morphogenesis; [GO:0032991] pr…	GO:0005615 extracellular space;GO:0044421 extracellular region part;GO:0005576 extracellular region	GO:0008613 diuretic hormone activity;GO:0005179 hormone activity;GO:0051427 hormone receptor binding		Candidate cardiovascular disease genes; Predicted secreted proteins	[IPR000663] Natriuretic peptide; [IPR002408] Natriuretic peptide, brain type; [IPR030480] Natriuretic peptide, conserved site		yes	yes			yes	principal1		MP:0005385 cardiovascular system phenotype; MP:0005369 muscle phenotype		OMIM ID:600295 Natriuretic peptide precursor b		monocyte chemoattractant protein 1 (66-77)	Cardiovascular Diseases;Homocysteine;Natriuretic Peptide, Brain				Carvedilol; Oxymetholone	Cardiac Output, High; Right ventricular systolic dysfunction; Giant cell myocarditis; Right Ventricular Dysfunction; Postoperative Complications; Acute ischemic heart disease; Left ventricular aneurysm; Methamphetamine intoxication; Tricuspid Valve Regurgitation Velocity; Valvular disease; Ventricular Dysfunction; Cardiotoxicity; Left ventricular outflow tract obstruction; Myocardial hypoxia; Tre…	1005	1033	[{"UniProt":"P16860","EnsemblGene":["ENSG00000120937"],"EnsemblTrans":[["ENST00000376468","ENSP00000365651","principal1"]],"RefSeq":[["NM_002521","NP_002512","REVIEWED"]],"UCSC":["uc001atj.4"],"SwissProt":["ANFB_HUMAN"]}]	heart	Distribution: Detected in some; Specificity: Tissue enriched				(hsa04270)Vascular smooth muscle contraction; (ko04022)cGMP-PKG signaling pathway; (hsa04022)cGMP-PKG signaling pathway				(M17400)BIOCARTA ALK PATHWAY
		Atg9b	285973	ATG9B	APG9L2|NOS3AS|SONE	protein-coding	autophagy related 9B	This gene functions in the regulation of autophagy, a lysosomal degradation pathway. This gene also functions as an antisense transcript in the posttranscriptional regulation of the endothelial nitric oxide synthase 3 gene, which has 3' overlap with this gene on the opposite strand. Mutations in this gene and disruption of the autophagy process have been associated with multiple cancers. Alternat…	chr7:151028267-151012209	GO:0044805 late nucleophagy;GO:0034497 protein localization to phagophore assembly site;GO:0044804 autophagy of nucleus	[GO:0005575] cellular_component; [GO:0008150] biological_process; [GO:0009056] catabolic process; [GO:0006914] autophagy; [GO:0005737] cytoplasm; [GO:0005622] intracellular; [GO:0043226] organelle; [GO:0031410] cytoplasmic vesicle; [GO:0005773] vacuole; [GO:0022607] cellular component assembly; [GO:0007005] mitochondrion organization	GO:0000407 phagophore assembly site;GO:0000421 autophagosome membrane;GO:0005776 autophagosome			Transporters	[IPR007241] Autophagy-related protein 9				yes	yes			yes	MP:0003631 nervous system phenotype; MP:0005391 vision/eye phenotype		OMIM ID:612205 Autophagy 9, s. cerevisiae, homolog of, b								Sporadic Breast Carcinoma; Lichen Planus, Oral; Hepatocarcinogenesis; Malignant neoplasm of thyroid; Thyroid Neoplasm; Thyroid carcinoma; Conventional (Clear Cell) Renal Cell Carcinoma; Secondary malignant neoplasm of lymph node	13	28	[{"UniProt":"Q674R7","EnsemblGene":["ENSG00000181652"],"RefSeq":[["XM_011516065","XP_011514367","MODEL"],["XM_011516066","XP_011514368","MODEL"]],"SwissProt":["ATG9B_HUMAN"]}]	placenta	Distribution: Detected in some; Specificity: Tissue enriched				(ko04136)Autophagy - other; (hsa04136)Autophagy - other; (ko04137)Mitophagy - animal
Down gene of D2HG-vs-NTC Down gene of D2HG-vs-NTC(2nd)	119	Herc3	8916	HERC3		protein-coding	HECT and RLD domain containing E3 ubiquitin protein ligase 3	This gene encodes a member the HERC ubiquitin ligase family. The encoded protein is located in the cytosol and binds ubiquitin via a HECT domain. Mutations in this gene have been associated with colorectal and gastric carcinomas. Alternatively spliced transcript variants encoding multiple isoforms have been observed for this gene. [provided by RefSeq, Oct 2012]	chr4:88523843-88709303	GO:0016567 protein ubiquitination;GO:0032446 protein modification by small protein conjugation;GO:0070647 protein modification by small protein conjugation or removal	[GO:0003674] molecular_function; [GO:0008150] biological_process; [GO:0006464] cellular protein modification process; [GO:0005575] cellular_component; [GO:0005737] cytoplasm; [GO:0005622] intracellular; [GO:0005829] cytosol; [GO:0043226] organelle; [GO:0031410] cytoplasmic vesicle	GO:0031410 cytoplasmic vesicle;GO:0097708 intracellular vesicle;GO:0031982 vesicle	GO:0004842 ubiquitin-protein transferase activity;GO:0019787 ubiquitin-like protein transferase activity;GO:0140096 catalytic activity, acting on a protein		ENZYME proteins:Transferases; Predicted intracellular proteins; Enzymes	[IPR000408] Regulator of chromosome condensation, RCC1; [IPR000569] HECT domain; [IPR009091] Regulator of chromosome condensation 1/beta-lactamase-inhibitor protein II; [IPR035983] HECT, E3 ligase catalytic domain	Cytosol (reliability'])								MP:0005386 behavior/neurological phenotype; MP:0003631 nervous system phenotype; MP:0010771 integument phenotype		OMIM ID:605200 Hect domain and rcc1-like domain 3		Albuminuria;C-Reactive Protein	Bronchodilator Agents;Forced Expiratory Volume;Lung Volume Measurements					Invasive carcinoma of breast; Liver neoplasms; Malignant neoplasm of liver	5	25	[{"UniProt":"Q15034","EnsemblGene":["ENSG00000138641"],"RefSeq":[["NM_001271602","NP_001258531","REVIEWED"]],"SwissProt":["HERC3_HUMAN"]},{"UniProt":"B4DK41","RefSeq":[["NM_001271602","NP_001258531","REVIEWED"]],"SwissProt":["B4DK41_HUMAN"]}]		Distribution: Detected in all; Specificity: Low tissue specificity	General cytoplasmic expression.; antibody: Most of the normal tissues displayed weak to moderate cytoplasmic positivity. The alveolar cells, bile ducts, pancreatic islets, renal glomeruli and bone marrow poetic cells were negative.	Antibody: Most of the malignant tissues displayed weak cytoplasmic positivity or were negative. Several cases of renal and liver cancers along with a few cases of breast, skin and pancreatic cancers exhibited moderate staining.		(hsa04120)Ubiquitin mediated proteolysis; (ko04120)Ubiquitin mediated proteolysis			(M5908)HALLMARK ANDROGEN RESPONSE
		Edn1	1906	EDN1	ARCND3|ET1|HDLCQ7|PPET1|QME	protein-coding	endothelin 1	This gene encodes a preproprotein that is proteolytically processed to generate a secreted peptide that belongs to the endothelin/sarafotoxin family. This peptide is a potent vasoconstrictor and its cognate receptors are therapeutic targets in the treatment of pulmonary arterial hypertension. Aberrant expression of this gene may promote tumorigenesis. Alternative splicing results in multiple tran…	chr6:12256463-12297194	GO:0031583 phospholipase D-activating G protein-coupled receptor signaling pathway;GO:0042313 protein kinase C deactivation;GO:0043179 rhythmic excitation	[GO:0005575] cellular_component; [GO:0005576] extracellular region; [GO:0008150] biological_process; [GO:0003013] circulatory system process; [GO:0005615] extracellular space; [GO:0008283] cell population proliferation; [GO:0030154] cell differentiation; [GO:0048856] anatomical structure development; [GO:0040007] growth; [GO:0040011] locomotion; [GO:0048870] cell motility; [GO:0034641] cellular n…	GO:0048237 rough endoplasmic reticulum lumen;GO:0033093 Weibel-Palade body;GO:0045178 basal part of cell	GO:0031707 endothelin A receptor binding;GO:0031708 endothelin B receptor binding;GO:0031705 bombesin receptor binding		Disease related genes; Cancer-related genes:Candidate cancer biomarkers; Candidate cardiovascular disease genes; Predicted secreted proteins	[IPR001928] Endothelin-like toxin; [IPR019764] Endothelin-like toxin, conserved site; [IPR020475] Endothelin	Golgi apparatus;Nucleoli (reliability']); Additional: Nucleoplasm	yes	yes			yes	principal1		MP:0005367 renal/urinary system phenotype; MP:0005385 cardiovascular system phenotype; MP:0010768 mortality/aging; MP:0005369 muscle phenotype; MP:0005376 homeostasis/metabolism phenotype; MP:0005378 growth/size/body region phenotype; MP:0005381 digestive/alimentary phenotype; MP:0003631 nervous system phenotype; MP:0005377 hearing/vestibular/ear phenotype; MP:0005390 skeleton phenotype; MP:00053…	[ORPHA:137888] Auriculocondylar syndrome	OMIM ID:131240 Endothelin 1	Question mark ears, isolated; Auriculocondylar syndrome 3	Blood Cells;Cholesterol, HDL;Hip;Platelet Function Tests;Tumor Necrosis Factor-alpha;alpha-Tocopherol	Affective Disorders, Psychotic;Attention Deficit Disorder with Hyperactivity;Body Mass Index;Immunoglobulin G;Multiple System Atrophy	[602483] Auriculocondylar syndrome; [612798] Question mark ears isolated	Auriculocondylar syndrome 3: pathogenic; Question mark ears, isolated: pathogenic	HP:0007627:Mandibular condyle aplasia; HP:0007628:Mandibular condyle hypoplasia; HP:0008513:Bilateral conductive hearing impairment; HP:0009902:Cleft helix; HP:0008751:Laryngeal cleft; HP:0030022:Question mark ear; HP:0009895:Abnormality of the crus of the helix; HP:0010754:Abnormality of the temporomandibular joint; HP:0100277:Periauricular skin pits; HP:0030713:Vein of Galen aneurysmal malforma…	TBC-3711	AURICULOCONDYLAR SYNDROME 3; Complicated atherosclerosis; QUESTION MARK EARS, ISOLATED; Uterovaginal prolapse; Feeling depressed; Abnormality of the crus of the helix; Cerebrovascular Insufficiency; Cleft helix; Endemic goiter; Mandibular condyle aplasia; Marginal ulcer; Postcapillary pulmonary hypertension; Abnormality of the temporomandibular joint; Aplasia/Hypoplasia of the external ear; Auric…	769	844	[{"UniProt":"P05305","EnsemblGene":["ENSG00000078401"],"EnsemblTrans":[["ENST00000379375","ENSP00000368683","principal1"]],"RefSeq":[["NM_001168319","NP_001161791","REVIEWED"],["NM_001955","NP_001946","REVIEWED"],["XM_011514330","XP_011512632","MODEL"],["XM_011514331","XP_011512633","MODEL"],["XM_017010331","XP_016865820","MODEL"]],"SwissProt":["EDN1_HUMAN"]},{"UniProt":"Q6FH53","RefSeq":[["NM_00…		Distribution: Detected in all; Specificity: Low tissue specificity	antibody: Most of the normal cells showed weak to moderate cytoplasmic positivity. Strong staining was observed in adrenal cortex and subsets of glial cells. Endothelial cells and plasma showed moderate positivity. Neuronal cells of the CNS showed nucleolar positivity.; Plasma positivity in most tissues. Cytoplasmic expression in endothelial cells.	Antibody: Cancer tissues showed weak to moderate cytoplasmic immunoreactivity. Most cases of lymphomas, skin and lung cancers were negative.	(M8)PID ENDOTHELIN PATHWAY; (M255)PID HIF1 TFPATHWAY; (M167)PID AP1 PATHWAY	(hsa04924)Renin secretion; (hsa05410)Hypertrophic cardiomyopathy; (ko04916)Melanogenesis			(M5890)HALLMARK TNFA SIGNALING VIA NFKB; (M5932)HALLMARK INFLAMMATORY RESPONSE; (M5956)HALLMARK KRAS SIGNALING DN	(M13324)BIOCARTA HIF PATHWAY; (M7552)BIOCARTA CARDIACEGF PATHWAY; (M2288)BIOCARTA NFAT PATHWAY
		Chst12	55501	CHST12	C4S-2|C4ST-2|C4ST2	protein-coding	carbohydrate sulfotransferase 12	The protein encoded by this gene belongs to the sulfotransferase 2 family. It is localized to the golgi membrane, and catalyzes the transfer of sulfate to position 4 of the N-acetylgalactosamine (GalNAc) residue of chondroitin and desulfated dermatan sulfate. Chondroitin sulfate constitutes the predominant proteoglycan present in cartilage, and is distributed on the surfaces of many cells and ext…	chr7:2403489-2448484	GO:0030208 dermatan sulfate biosynthetic process;GO:0030205 dermatan sulfate metabolic process;GO:0050651 dermatan sulfate proteoglycan biosynthetic process	[GO:0005575] cellular_component; [GO:0003674] molecular_function; [GO:0008150] biological_process; [GO:0009058] biosynthetic process; [GO:0005975] carbohydrate metabolic process; [GO:0005737] cytoplasm; [GO:0005622] intracellular; [GO:0043226] organelle; [GO:0005794] Golgi apparatus; [GO:0044281] small molecule metabolic process; [GO:0006790] sulfur compound metabolic process; [GO:0043167] ion bi…	GO:0030173 integral component of Golgi membrane;GO:0031228 intrinsic component of Golgi membrane;GO:0031301 integral component of organelle membrane	GO:0047756 chondroitin 4-sulfotransferase activity;GO:0034481 chondroitin sulfotransferase activity;GO:0050656 3'-phosphoadenosine 5'-phosphosulfate binding		ENZYME proteins:Transferases; Enzymes	[IPR005331] Sulfotransferase; [IPR018011] Carbohydrate sulfotransferase 8-10	Golgi apparatus (reliability'])			yes	yes		principal1	yes			OMIM ID:610129 Carbohydrate sulfotransferase 12		Blood Pressure	Multiple Sclerosis					Kashin-Beck Disease; Lupus Vulgaris; Lupus Erythematosus, Discoid; Lupus Erythematosus; Blood Protein Measurement; Lupus Erythematosus, Systemic	3	20	[{"UniProt":"Q9NRB3","EnsemblGene":["ENSG00000136213"],"EnsemblTrans":[["ENST00000258711","ENSP00000258711","principal1"],["ENST00000618655","ENSP00000481912","principal1"]],"RefSeq":[["NM_001243794","NP_001230723","REVIEWED"],["NM_001243795","NP_001230724","REVIEWED"],["NM_018641","NP_061111","REVIEWED"],["XM_011515443","XP_011513745","MODEL"],["XM_011515444","XP_011513746","MODEL"]],"UCSC":["uc…	peripheral_nervous_system	Distribution: Detected in all; Specificity: Low tissue specificity	antibody: Most normal tissues displayed weak to moderate cytoplasmic and nuclear positivity. Stomach, gall bladder and adrenal cortex were strongly stained. Most cells in the CNS were negative.; Cytoplasmic and nuclear expression in most tissues.	Antibody: Moderate cytoplasmic and nuclear immunoreactivity was observed in carcinoids, prostate, colorectal, breast, thyroid cancers along with a few ovarian and endometrial cancers. Remaining cancers were in general weakly stained or negative.		(ko00532)Glycosaminoglycan biosynthesis - chondroitin sulfate / dermatan sulfate; (hsa00532)Glycosaminoglycan biosynthesis - chondroitin sulfate / dermatan sulfate; (hsanan02)glycosaminoglycan biosynthesis			(M5937)HALLMARK GLYCOLYSIS
		Lzts1	11178	LZTS1	F37|FEZ1	protein-coding	leucine zipper tumor suppressor 1	This gene encodes a tumor suppressor protein that is ubiquitously expressed in normal tissues. In uveal melanomas, expression of this protein is silenced in rapidly metastasizing and metastatic tumor cells but has normal expression in slowly metastasizing or nonmetastasizing tumor cells. This protein may have a role in cell-cycle control by interacting with the Cdk1/cyclinB1 complex. This gene is…	chr8:20303963-20246165	GO:0016242 negative regulation of macroautophagy;GO:0010507 negative regulation of autophagy;GO:0048814 regulation of dendrite morphogenesis	[GO:0003674] molecular_function; [GO:0008092] cytoskeletal protein binding; [GO:0008150] biological_process; [GO:0007049] cell cycle; [GO:0000278] mitotic cell cycle; [GO:0005575] cellular_component; [GO:0005737] cytoplasm; [GO:0005622] intracellular; [GO:0005886] plasma membrane; [GO:0043226] organelle; [GO:0007267] cell-cell signaling; [GO:0030154] cell differentiation; [GO:0048856] anatomical …	GO:0043198 dendritic shaft;GO:0043197 dendritic spine;GO:0044309 neuron spine	GO:0008017 microtubule binding;GO:0015631 tubulin binding;GO:0008092 cytoskeletal protein binding		Disease related genes; Predicted intracellular proteins	[IPR033293] Leucine zipper putative tumour suppressor 1	Plasma membrane (reliability']); Additional: Nucleoli					yes			MP:0005370 liver/biliary system phenotype; MP:0005384 cellular phenotype; MP:0005386 behavior/neurological phenotype; MP:0005381 digestive/alimentary phenotype; MP:0002006 neoplasm; MP:0003631 nervous system phenotype; MP:0005379 endocrine/exocrine gland phenotype; MP:0010771 integument phenotype; MP:0005388 respiratory system phenotype		OMIM ID:606551 Leucine zipper, putative tumor suppressor 1	Esophageal squamous cell carcinoma, somatic	Blood Pressure;Body Weight;Cardiovascular Diseases;Insulin	Peroxidases		Esophageal squamous cell carcinoma, somatic: pathogenic	HP:0002860:Squamous cell carcinoma; HP:0001428:Somatic mutation; HP:0000006:Autosomal dominant inheritance		ESOPHAGEAL SQUAMOUS CELL CARCINOMA, SOMATIC; Benign neoplasm of esophagus; Carcinoma in situ of esophagus; Micropapillary carcinoma; Hereditary Prostate Carcinoma; Prostate cancer, familial; Somatic mutation; Hereditary pancreatitis; TARSAL-CARPAL COALITION SYNDROME; Squamous cell carcinoma of skin; Carcinoma, Transitional Cell; Malignant neoplasm of kidney; Renal carcinoma; Recurrent tumor; Esop…	16	35	[{"UniProt":"Q9Y250","EnsemblGene":["ENSG00000061337"],"RefSeq":[["XM_005273394","XP_005273451"],["XM_011544383","XP_011542685"]],"SwissProt":["LZTS1_HUMAN"]}]		Distribution: Detected in many; Specificity: Group enriched	antibody: Normal tissues showed moderate to strong cytoplasmic positivity.; Cytoplasmic expression in most tissues.	Antibody: Most cancer cells displayed moderate cytoplasmic immunoreactivity. Strong positivity was observed in a majority of melanomas and several cases of gastric, cervical, prostate and colorectal cancers. Several lymphomas and renal cancers were weakly stained.
		Ptprb	5787	PTPRB	HPTP-BETA|HPTPB|PTPB|R-PTP-BETA|VEPTP	protein-coding	protein tyrosine phosphatase receptor type B	The protein encoded by this gene is a member of the protein tyrosine phosphatase (PTP) family. PTPs are known to be signaling molecules that regulate a variety of cellular processes including cell growth, differentiation, mitotic cycle, and oncogenic transformation. This PTP contains an extracellular domain, a single transmembrane segment and one intracytoplasmic catalytic domain, thus belongs to…	chr12:70637440-70515870	GO:1990264 peptidyl-tyrosine dephosphorylation involved in inactivation of protein kinase activity;GO:0035335 peptidyl-tyrosine dephosphorylation;GO:0006469 negative regulation of protein kinase activity	[GO:0003674] molecular_function; [GO:0016791] phosphatase activity; [GO:0008150] biological_process; [GO:0006464] cellular protein modification process; [GO:0005575] cellular_component; [GO:0048856] anatomical structure development; [GO:0048646] anatomical structure formation involved in morphogenesis; [GO:0005886] plasma membrane; [GO:0006810] transport; [GO:0002376] immune system process; [GO:0…	GO:0070821 tertiary granule membrane;GO:0035579 specific granule membrane;GO:0042581 specific granule	GO:0005001 transmembrane receptor protein tyrosine phosphatase activity;GO:0019198 transmembrane receptor protein phosphatase activity;GO:0004725 protein tyrosine phosphatase activity		ENZYME proteins:Hydrolases; Predicted intracellular proteins; Cancer-related genes; Enzymes	[IPR000242] PTP type protein phosphatase; [IPR000387] Tyrosine specific protein phosphatases domain; [IPR000772] Ricin B, lectin domain; [IPR003595] Protein-tyrosine phosphatase, catalytic; [IPR003961] Fibronectin type III; [IPR013783] Immunoglobulin-like fold; [IPR016130] Protein-tyrosine phosphatase, active site; [IPR029021] Protein-tyrosine phosphatase-like; [IPR035992] Ricin B-like lectins; […	Plasma membrane (reliability']); Additional: Cell Junctions;Vesicles			yes	yes	yes			MP:0005385 cardiovascular system phenotype; MP:0010768 mortality/aging; MP:0005369 muscle phenotype; MP:0005376 homeostasis/metabolism phenotype; MP:0005384 cellular phenotype; MP:0005378 growth/size/body region phenotype; MP:0010771 integument phenotype; MP:0005380 embryo phenotype		OMIM ID:176882 Protein-tyrosine phosphatase, receptor-type, beta		Blood Pressure;Calcium;Platelet Function Tests	HIV-1;Peripheral Nervous System Diseases;Reverse Transcriptase Inhibitors				{4-[2-BENZYL-3-METHOXY-2-(METHOXYCARBONYL)-3-OXOPROPYL]PHENYL}SULFAMIC ACID; (4-{4-[(TERT-BUTOXYCARBONYL)AMINO]-2,2-BIS(ETHOXYCARBONYL)BUTYL}PHENYL)SULFAMIC ACID; {4-[2,2-BIS(5-METHYL-1,2,4-OXADIAZOL-3-YL)-3-PHENYLPROPYL]PHENYL}SULFAMIC ACID; (4-ETHYLPHENYL)SULFAMIC ACID	Adult Angiosarcoma; Childhood Angiosarcoma; Hemangiosarcoma; Central Serous Chorioretinopathy; Drug Dependence; Vascular Diseases; Glaucoma; Tuberculosis; Cerebrovascular accident; Adenocarcinoma; Adenocarcinoma of lung (disorder); Carcinoma; Secondary Neoplasm; Mammary Neoplasms; Obesity; Diabetes Mellitus, Non-Insulin-Dependent; Primary malignant neoplasm of lung; Carcinoma of lung; Malignant n…	19	58	[{"UniProt":"F8VU56","EnsemblGene":["ENSG00000127329"],"EnsemblTrans":[["ENST00000550358","ENSP00000448058",""]],"RefSeq":[["NM_001330204","NP_001317133","REVIEWED"]],"UCSC":["uc001swa.6"],"SwissProt":["F8VU56_HUMAN"]},{"UniProt":"P23467","EnsemblGene":["ENSG00000127329"],"RefSeq":[["NM_001330204","NP_001317133","REVIEWED"]],"SwissProt":["PTPRB_HUMAN"]},{"UniProt":"Q68D73","RefSeq":[["NM_00133020…	kidney	Distribution: Detected in many; Specificity: Low tissue specificity	Cytoplasmic expression mainly in CNS and peripheral nerves.; antibody: A subset of cells in germinal centers of lymphoid tissues, cells in gastric mucosa, male genitalia, adrenal gland, peripheral nerves and neuropil showed strong cytoplasmic positivity. Most other tissues were negative.	Antibody: Prostate, thyroid, cancers, malignant gliomas and lymphomas showed moderate to strong cytoplasmic positivity. Few cases of malignant carcinoids, testis, renal, gastric and pancreatic cancers displayed immunoreactivity. Remaining malignancies were weakly stained or negative.		(ko04520)Adherens junction; (hsa04520)Adherens junction				(M1389)BIOCARTA SPRY PATHWAY
		Col8a2	1296	COL8A2	FECD|FECD1|PPCD|PPCD2	protein-coding	collagen type VIII alpha 2 chain	This gene encodes the alpha 2 chain of type VIII collagen. This protein is a major component of the basement membrane of the corneal endothelium and forms homo- or heterotrimers with alpha 1 (VIII) type collagens. Defects in this gene are associated with Fuchs endothelial corneal dystrophy and posterior polymorphous corneal dystrophy type 2. Alternative splicing results in multiple transcript var…	chr1:36126207-36095239	GO:0048593 camera-type eye morphogenesis;GO:0048592 eye morphogenesis;GO:0090596 sensory organ morphogenesis	[GO:0003674] molecular_function; [GO:0008150] biological_process; [GO:0007155] cell adhesion; [GO:0005575] cellular_component; [GO:0005576] extracellular region; [GO:0032991] protein-containing complex; [GO:0031012] extracellular matrix; [GO:0048856] anatomical structure development; [GO:0048646] anatomical structure formation involved in morphogenesis; [GO:0005615] extracellular space; [GO:00051…	GO:0005581 collagen trimer;GO:0005604 basement membrane;GO:0005788 endoplasmic reticulum lumen	GO:0030020 extracellular matrix structural constituent conferring tensile strength;GO:0030674 protein binding, bridging;GO:0005201 extracellular matrix structural constituent		Disease related genes; Predicted secreted proteins; Predicted intracellular proteins	[IPR001073] C1q domain; [IPR008160] Collagen triple helix repeat; [IPR008983] Tumour necrosis factor-like domain superfamily	Golgi apparatus (reliability'])	yes	yes				principal3		MP:0005376 homeostasis/metabolism phenotype; MP:0005384 cellular phenotype; MP:0005391 vision/eye phenotype	[ORPHA:98974] Fuchs endothelial corneal dystrophy; [ORPHA:98973] Posterior polymorphous corneal dystrophy	OMIM ID:120252 Collagen, type viii, alpha-2	Corneal dystrophy, Fuchs endothelial 1; Corneal dystrophy, posterior polymorphous, 2		Corneal Topography		Corneal dystrophy, posterior polymorphous, 2: pathogenic; Corneal dystrophy, fuchs endothelial 1: pathogenic	HP:0012039:Descemet Membrane Folds; HP:0007705:Corneal degeneration; HP:0012040:Corneal stromal edema; HP:0012038:Corneal guttata; HP:0001131:Corneal dystrophy; HP:0007957:Corneal opacity; HP:0000006:Autosomal dominant inheritance		CORNEAL DYSTROPHY, POSTERIOR POLYMORPHOUS, 2; Descemet's membrane fold; Fine corneal edema; Corneal stromal edema; Corneal degeneration; Congenital hereditary endothelial dystrophy; CORNEAL DYSTROPHY, FUCHS ENDOTHELIAL, 2; Chandler syndrome; Corneal guttata; CORNEAL ENDOTHELIAL DYSTROPHY 2; Corneal dystrophy, Fuchs' endothelial, 1; Keratoglobus; CORNEAL ENDOTHELIAL DYSTROPHY 1, AUTOSOMAL DOMINANT…	21	43	[{"UniProt":"P25067","EnsemblGene":["ENSG00000171812"],"EnsemblTrans":[["ENST00000303143","ENSP00000305913","principal3"],["ENST00000397799","ENSP00000380901","principal3"]],"RefSeq":[["NM_001294347","NP_001281276","REVIEWED"],["NM_005202","NP_005193","REVIEWED"]],"UCSC":["uc001bzv.4"],"SwissProt":["CO8A2_HUMAN"]},{"UniProt":"E9PP49","EnsemblGene":["ENSG00000171812"],"EnsemblTrans":[["ENST0000048…	bone;colon	Distribution: Detected in many; Specificity: Tissue enhanced	antibody: Small intestine, stomach, Leydig cells, exocrine pancreas, hepatocytes and squamous epithelia of tonsil displayed weak to moderate cytoplasmic staining. A subset of lymphoid cells scattered throughout most tissues showed strong staining. Remaining normal tissues were negative.; RNA-based expert annotation gave inconclusive results.	Antibody: A rare case of melanoma displayed strong membranous staining. Moderate nuclear positivity was observed in a rare case of melanoma, stomach and testicular cancer. A case of ovarian cancer displayed moderate cytoplasmic staining. Remaining cancer tissues were negative.	(M3005)NABA COLLAGENS; (M198)PID SYNDECAN 1 PATHWAY; (M160)PID AVB3 INTEGRIN PATHWAY				(M5930)HALLMARK EPITHELIAL MESENCHYMAL TRANSITION
		Fstl3	10272	FSTL3	FLRG|FSRP	protein-coding	follistatin like 3	Follistatin-like 3 is a secreted glycoprotein of the follistatin-module-protein family. It may have a role in leukemogenesis. [provided by RefSeq, Jul 2008]	chr19:676392-683385	GO:0032926 negative regulation of activin receptor signaling pathway;GO:0030325 adrenal gland development;GO:0032925 regulation of activin receptor signaling pathway	[GO:0003674] molecular_function; [GO:0005575] cellular_component; [GO:0005622] intracellular; [GO:0043226] organelle; [GO:0005634] nucleus; [GO:0005654] nucleoplasm; [GO:0005576] extracellular region; [GO:0005615] extracellular space; [GO:0008150] biological_process; [GO:0048856] anatomical structure development; [GO:0000003] reproduction; [GO:0007165] signal transduction; [GO:0034641] cellular n…	GO:0044306 neuron projection terminus;GO:0005788 endoplasmic reticulum lumen;GO:0030141 secretory granule	GO:0048185 activin binding;GO:0001968 fibronectin binding;GO:0044877 protein-containing complex binding		Predicted intracellular proteins; Disease related genes; Predicted secreted proteins; Cancer-related genes	[IPR002350] Kazal domain; [IPR003645] Follistatin-like, N-terminal; [IPR015369] Follistatin/Osteonectin EGF domain; [IPR017878] TB domain; [IPR036058] Kazal domain superfamily; [IPR036773] TGF-beta binding (TB) domain superfamily	Nucleoplasm (reliability'])	yes	yes						MP:0005370 liver/biliary system phenotype; MP:0005385 cardiovascular system phenotype; MP:0005376 homeostasis/metabolism phenotype; MP:0005378 growth/size/body region phenotype; MP:0005389 reproductive system phenotype; MP:0005379 endocrine/exocrine gland phenotype; MP:0005375 adipose tissue phenotype		OMIM ID:605343 Follistatin-like 3								Diminished ovarian reserve; Takayasu Arteritis; Limb ischemia; Rheumatism; Eclampsia; Cardiac fibrosis; Dyslipidemias; Invasive carcinoma of breast; Renal Insufficiency; Gestational Diabetes; Fatty Liver; Fetal Growth Retardation; Non-alcoholic Fatty Liver Disease; Chronic Kidney Diseases; Metabolic Syndrome X; Steatohepatitis; Liver neoplasms; Heart failure; Cerebrovascular accident; Cardiovascu…	37	54	[{"UniProt":"O95633","EnsemblGene":["ENSG00000070404"],"SwissProt":["FSTL3_HUMAN"]},{"UniProt":"A0A024R1Y8","RefSeq":[["NM_005860","NP_005851","REVIEWED"]],"SwissProt":["A0A024R1Y8_HUMAN"]}]	placenta	Distribution: Detected in all; Specificity: Tissue enriched	Nuclear expression in several tissues, including placenta.; antibody: Normal tissues generally showed moderate to strong nuclear staining.	Antibody: Cancer cells showed moderate to strong nuclear immunoreactivity.	(M5883)NABA SECRETED FACTORS; (M5885)NABA MATRISOME ASSOCIATED; (M5889)NABA MATRISOME				(M5930)HALLMARK EPITHELIAL MESENCHYMAL TRANSITION
		Fndc5	252995	FNDC5	FRCP2|irisin	protein-coding	fibronectin type III domain containing 5	This gene encodes a secreted protein that is released from muscle cells during exercise. The encoded protein may participate in the development of brown fat. Translation of the precursor protein initiates at a non-AUG start codon at a position that is conserved as an AUG start codon in other organisms. Alternative splicing results in multiple transcript variants. [provided by RefSeq, Jun 2013]	chr1:32872484-32862268	GO:0090336 positive regulation of brown fat cell differentiation;GO:0014850 response to muscle activity;GO:0090335 regulation of brown fat cell differentiation	[GO:0003674] molecular_function; [GO:0005575] cellular_component; [GO:0008150] biological_process; [GO:0030154] cell differentiation; [GO:0005576] extracellular region; [GO:0005737] cytoplasm; [GO:0005622] intracellular; [GO:0043226] organelle; [GO:0005783] endoplasmic reticulum; [GO:0005886] plasma membrane; [GO:0007165] signal transduction; [GO:0005777] peroxisome	GO:0005778 peroxisomal membrane;GO:0031903 microbody membrane;GO:0044438 microbody part	GO:0005179 hormone activity;GO:0048018 receptor ligand activity;GO:0030545 receptor regulator activity			[IPR003961] Fibronectin type III; [IPR013783] Immunoglobulin-like fold; [IPR032073] Fibronectin type III domain-containing protein 5, C-terminal domain; [IPR036116] Fibronectin type III superfamily		yes		yes	yes			yes	MP:0005390 skeleton phenotype		OMIM ID:611906 Fibronectin type iii domain-containing protein 5								Non-toxic multinodular goiter; Toxic goiter; Endomyocardial Fibrosis; Cardiac Hypertrophy; Ventricular Dysfunction, Left; Postoperative cognitive dysfunction; Childhood Renal Cell Carcinoma; Cardiomegaly; Cachexia; Vascular inflammations; Forgetful; Nonalcoholic Steatohepatitis; Hyperlipidemia; Adult Rhabdomyosarcoma; Childhood Rhabdomyosarcoma; Ewings sarcoma; Rhabdomyosarcoma; Graves Disease; G…	209	224	[{"UniProt":"Q8NAU1","EnsemblGene":["ENSG00000160097"],"SwissProt":["FNDC5_HUMAN"]}]		Distribution: Detected in many; Specificity: Tissue enhanced	Cytoplasmic expression in heart and skeletal muscle cells.; antibody: Moderate cytoplasmic positivity was observed in heart and skeletal muscle. Strong positivity in a subset of renal tubules. Remaining normal tissues were weakly stained or negative.	Antibody: A few cases of melanoma, stomach and urothelial cancer showed moderate to strong cytoplasmic positivity.
		Syn1	6853	SYN1	MRX50|SYN1a|SYN1b|SYNI	protein-coding	synapsin I	This gene is a member of the synapsin gene family. Synapsins encode neuronal phosphoproteins which associate with the cytoplasmic surface of synaptic vesicles. Family members are characterized by common protein domains, and they are implicated in synaptogenesis and the modulation of neurotransmitter release, suggesting a potential role in several neuropsychiatric diseases. This member of the syna…	chrX:47619857-47571901	GO:0097091 synaptic vesicle clustering;GO:2000300 regulation of synaptic vesicle exocytosis;GO:1902803 regulation of synaptic vesicle transport	[GO:0003674] molecular_function; [GO:0043167] ion binding; [GO:0005575] cellular_component; [GO:0005737] cytoplasm; [GO:0005622] intracellular; [GO:0043226] organelle; [GO:0031410] cytoplasmic vesicle; [GO:0008150] biological_process; [GO:0006810] transport; [GO:0007267] cell-cell signaling; [GO:0005794] Golgi apparatus; [GO:0008092] cytoskeletal protein binding; [GO:0005856] cytoskeleton; [GO:00…	GO:0098850 extrinsic component of synaptic vesicle membrane;GO:0098993 anchored component of synaptic vesicle membrane;GO:0000795 synaptonemal complex	GO:0048306 calcium-dependent protein binding;GO:0003779 actin binding;GO:0019901 protein kinase binding		Disease related genes; Predicted intracellular proteins	[IPR001359] Synapsin; [IPR013815] ATP-grasp fold, subdomain 1; [IPR016185] Pre-ATP-grasp domain superfamily; [IPR019735] Synapsin, conserved site; [IPR019736] Synapsin, phosphorylation site; [IPR020897] Synapsin, pre-ATP-grasp domain; [IPR020898] Synapsin, ATP-binding domain; [IPR028713] Synapsin-1						yes			MP:0005386 behavior/neurological phenotype; MP:0003631 nervous system phenotype	[ORPHA:85294] X-linked epilepsy-learning disabilities-behavior disorders syndrome	OMIM ID:313440 Synapsin i	Epilepsy, X-linked, with variable learning disabilities and behavior disorders; Seizures; History of neurodevelopmental disorder; Inborn genetic diseases			[300491] EPILEPSY X-LINKED WITH VARIABLE LEARNING DISABILITIES AND BEHAVIOR DISORDERS	Clinvar: phenotype not specified: likely pathogenic,pathogenic; Epilepsy, x-linked, with variable learning disabilities and behavior disorders: likely pathogenic,pathogenic; Inborn genetic diseases: likely pathogenic	HP:0001423:X-linked dominant inheritance; HP:0007359:Focal-onset seizure; HP:0001328:Specific learning disability; HP:0000718:Aggressive behavior; HP:0001419:X-linked recessive inheritance; HP:0000729:Autistic behavior; HP:0000256:Macrocephaly; HP:0001250:Seizures	Adenosine 5'-[gamma-thio]triphosphate	Epilepsy, X-Linked, with Variable Learning Disabilities and Behavior Disorders; Gangliosidoses, GM2; Tonic-Clonic Epilepsy; Neurofibrosarcoma; Adult Diffuse Astrocytoma; Childhood Diffuse Astrocytoma; Limbic Encephalitis; Reflex Epilepsy, Audiogenic; idiopathic epilepsy; Specific language impairment; Clinically isolated syndrome; Social Anxiety; Toxic Shock Syndrome; X-linked dominant inheritance…	23	73	[{"UniProt":"P17600","EnsemblGene":["ENSG00000008056"],"SwissProt":["SYN1_HUMAN"]}]	brain	Distribution: Detected in many; Specificity: Tissue enriched	antibody: The adrenal, neuropil along with Leydig cells and subset of cells in gallbladder exhibited moderate cytoplasmic immunoreactivity. Other normal tissues were in general weakly stained or were negative.; Selective expression in neuropil and peripheral nerves.	Antibody: Fraction of cells in few urothelial and breast cancers showed moderate cytoplasmic positivity. Other cancer tissues were in general weakly stained or negative.
		Timp1	7076	TIMP1	CLGI|EPA|EPO|HCI|TIMP|TIMP-1	protein-coding	TIMP metallopeptidase inhibitor 1	This gene belongs to the TIMP gene family. The proteins encoded by this gene family are natural inhibitors of the matrix metalloproteinases (MMPs), a group of peptidases involved in degradation of the extracellular matrix. In addition to its inhibitory role against most of the known MMPs, the encoded protein is able to promote cell proliferation in a wide range of cell types, and may also have an…	chrX:47582408-47586789	GO:0002248 connective tissue replacement involved in inflammatory response wound healing;GO:0002246 wound healing involved in inflammatory response;GO:0051045 negative regulation of membrane protein ectodomain proteolysis	[GO:0003674] molecular_function; [GO:0030234] enzyme regulator activity; [GO:0043167] ion binding; [GO:0007165] signal transduction; [GO:0008150] biological_process; [GO:0005575] cellular_component; [GO:0005576] extracellular region; [GO:0000003] reproduction; [GO:0048856] anatomical structure development; [GO:0040011] locomotion; [GO:0048870] cell motility; [GO:0032991] protein-containing comple…	GO:0031093 platelet alpha granule lumen;GO:0031091 platelet alpha granule;GO:0005604 basement membrane	GO:0008191 metalloendopeptidase inhibitor activity;GO:0002020 protease binding;GO:0008083 growth factor activity		Cancer-related genes:Candidate cancer biomarkers; Candidate cardiovascular disease genes; Predicted secreted proteins; Predicted intracellular proteins	[IPR001134] Netrin domain; [IPR001820] Protease inhibitor I35 (TIMP); [IPR008993] Tissue inhibitor of metalloproteinases-like, OB-fold; [IPR015611] Metalloproteinase inhibitor 1; [IPR030490] Tissue inhibitor of metalloproteinase, conserved site; [IPR027465] Proteinase inhibitor I35b (TIMP), C-terminal	Golgi apparatus (reliability'])	yes	yes			yes	principal1		MP:0005385 cardiovascular system phenotype; MP:0010768 mortality/aging; MP:0005376 homeostasis/metabolism phenotype; MP:0005378 growth/size/body region phenotype; MP:0005387 immune system phenotype; MP:0005389 reproductive system phenotype; MP:0005371 limbs/digits/tail phenotype; MP:0005390 skeleton phenotype; MP:0005397 hematopoietic system phenotype; MP:0005379 endocrine/exocrine gland phenotyp…		OMIM ID:305370 Tissue inhibitor of metalloproteinase 1								Spinal Cord Vascular Diseases; Joint function disorder; Necrotizing Scleritis; Non-herpetic acute limbic encephalitis; ovarian cystic disease; Digital ulcer; Dyssegmental dysplasia; Exudative otitis media; Isolated aortic stenosis; Autoimmune inner ear disease; Vertebrobasilar Dolichoectasia; Parastomal hernia; Acanthamoeba Infection; Dianzani autoimmune lymphoproliferative syndrome; Floppy; HEMA…	607	657	[{"UniProt":"P01033","EnsemblGene":["ENSG00000102265"],"EnsemblTrans":[["ENST00000218388","ENSP00000218388","principal1"]],"RefSeq":[["NM_003254","NP_003245","REVIEWED"]],"SwissProt":["TIMP1_HUMAN"]},{"UniProt":"Q6FGX5","RefSeq":[["NM_003254","NP_003245","REVIEWED"]],"UCSC":["uc004dif.4"],"SwissProt":["Q6FGX5_HUMAN"]},{"UniProt":"B4DJK3","RefSeq":[["XM_017029766","XP_016885255","MODEL"]],"SwissPr…		Distribution: Detected in all; Specificity: Tissue enhanced	antibody: Glandular cells in cervix and prostate showed strong cytoplasmic staining. Subsets of cells in the gastrointestinal tract, salivary gland and pancreas showed moderate cytoplasmic positivity. Remaining normal cells were weakly stained or negative.; Selective protein expression in glandular cells in prostate, mucus secreting cells in cervix, salivary gland and gastrointestinal tract.	Antibody: A few cases of cholangiocarcinomas, prostate, ovarian and endometrial cancers showed moderate to strong cytoplasmic positivity. Remaining tumour tissues were weakly stained or negative.	(M183)PID IL6 7 PATHWAY; (M167)PID AP1 PATHWAY; (M3468)NABA ECM REGULATORS	(hsa04640)Hematopoietic cell lineage; (hsa04066)HIF-1 signaling pathway; (hsa04630)JAK-STAT signaling pathway			(M5944)HALLMARK ANGIOGENESIS; (M5946)HALLMARK COAGULATION; (M5902)HALLMARK APOPTOSIS	(M22068)BIOCARTA RECK PATHWAY
		Klc3	147700	KLC3	KLC2|KLC2L|KLCt|KNS2B	protein-coding	kinesin light chain 3	This gene encodes a member of the kinesin light chain gene family. Kinesins are molecular motors involved in the transport of cargo along microtubules, and are composed of two kinesin heavy chain (KHC) and two kinesin light chain (KLC) molecules. KLCs are thought to typically be involved in binding cargo and regulating kinesin activity. In the rat, a protein similar to this gene product is expres…	chr19:45340750-45351548	GO:0008088 axo-dendritic transport;GO:0010970 transport along microtubule;GO:0099111 microtubule-based transport	[GO:0003674] molecular_function; [GO:0005575] cellular_component; [GO:0005622] intracellular; [GO:0043226] organelle; [GO:0032991] protein-containing complex; [GO:0005856] cytoskeleton; [GO:0005737] cytoplasm; [GO:0008092] cytoskeletal protein binding; [GO:0008150] biological_process; [GO:0006810] transport; [GO:0030705] cytoskeleton-dependent intracellular transport; [GO:0005929] cilium	GO:0035253 ciliary rootlet;GO:0005871 kinesin complex;GO:0005875 microtubule associated complex	GO:0019894 kinesin binding;GO:0003777 microtubule motor activity;GO:0003774 motor activity		Predicted intracellular proteins	[IPR002151] Kinesin light chain; [IPR011990] Tetratricopeptide-like helical domain superfamily; [IPR013026] Tetratricopeptide repeat-containing domain; [IPR019734] Tetratricopeptide repeat	Actin filaments (reliability']); Additional: Cytosol;Nucleoplasm										OMIM ID:601334 Kinesin light chain 3			Lung Neoplasms		Spastic paraplegia, optic atrophy, and neuropathy: pathogenic			Non-Small Cell Lung Carcinoma	6	31	[{"UniProt":"Q6P597","EnsemblGene":["ENSG00000104892"],"SwissProt":["KLC3_HUMAN"]},{"UniProt":"A0A024R0V3","RefSeq":[["NM_177417","NP_803136","REVIEWED"]],"SwissProt":["A0A024R0V3_HUMAN"]}]		Distribution: Detected in many; Specificity: Tissue enhanced	Cytoplasmic expression in squamous epithelia.; antibody: Normal tissues displayed weak to moderate cytoplasmic and/or nuclear positivity. Strong staining was observed in intestinal tract, esophagus and gall bladder. Hepatocytes were negative.	Antibody: Cancer tissues displayed weak to moderate cytoplasmic and/or nuclear positivity. Strong staining was observed in a few cases of breast, ovarian, head & neck, lung, skin, urothelial and pancreatic cancers.		(ko05132)Salmonella infection; (hsa05132)Salmonella infection
		Rundc3a	10900	RUNDC3A	RAP2IP|RPIP-8|RPIP8	protein-coding	RUN domain containing 3A		chr17:44308559-44318670	GO:0010753 positive regulation of cGMP-mediated signaling;GO:0010752 regulation of cGMP-mediated signaling;GO:0019934 cGMP-mediated signaling	[GO:0008150] biological_process; [GO:0003674] molecular_function; [GO:0005575] cellular_component; [GO:0005737] cytoplasm; [GO:0005622] intracellular; [GO:0005829] cytosol; [GO:0030234] enzyme regulator activity; [GO:0007165] signal transduction; [GO:0005886] plasma membrane	GO:0005829 cytosol;GO:0005886 plasma membrane;GO:0071944 cell periphery	GO:0030695 GTPase regulator activity;GO:0060589 nucleoside-triphosphatase regulator activity;GO:0030234 enzyme regulator activity		Predicted intracellular proteins	[IPR004012] RUN domain; [IPR037213] RUN domain superfamily	Vesicles (reliability'])								MP:0005385 cardiovascular system phenotype		OMIM ID:605448 Run domain-containing protein 3a								Adenocarcinoma of rectum; Rectal Carcinoma; Eosinophil count procedure		15	[{"UniProt":"Q59EK9","EnsemblGene":["ENSG00000108309"],"SwissProt":["RUN3A_HUMAN"]}]	brain	Distribution: Detected in many; Specificity: Tissue enriched	antibody: Strong extracellular staining in hippocampus. Also, weak cytoplasmic positivity was observed in neuronal cells of hippocampus. Remaining normal tissues were negative.; Distinct extracellular positivity and expression in neuronal projections in hippocampus.	Antibody: Most cancers weakly stained or negative.
		Gjd4	219770	GJD4	CX40.1	protein-coding	gap junction protein delta 4	Connexins, such as GJD4, are involved in the formation of gap junctions, intercellular conduits that directly connect the cytoplasms of contacting cells. Each gap junction channel is formed by docking of 2 hemichannels, each of which contains 6 connexin subunits (Sohl et al., 2003 [PubMed 12881038]).[supplied by OMIM, Mar 2008]	chr10:35605341-35608935	GO:0014717 regulation of satellite cell activation involved in skeletal muscle regeneration;GO:0014901 satellite cell activation involved in skeletal muscle regeneration;GO:0014719 skeletal muscle satellite cell activation	[GO:0008150] biological_process; [GO:0005886] plasma membrane; [GO:0005575] cellular_component; [GO:0032991] protein-containing complex; [GO:0006810] transport; [GO:0055085] transmembrane transport; [GO:0003674] molecular_function; [GO:0022857] transmembrane transporter activity; [GO:0007267] cell-cell signaling; [GO:0006950] response to stress; [GO:0048856] anatomical structure development; [GO:…	GO:0005922 connexin complex;GO:0005921 gap junction;GO:0005911 cell-cell junction	GO:0005243 gap junction channel activity;GO:0022829 wide pore channel activity;GO:0015267 channel activity		Transporters:Transporter channels and pores	[IPR000500] Connexin; [IPR013092] Connexin, N-terminal; [IPR017990] Connexin, conserved site; [IPR019570] Gap junction protein, cysteine-rich domain; [IPR038359] Connexin, N-terminal domain superfamily				yes	yes		principal1	yes	MP:0005369 muscle phenotype; MP:0005387 immune system phenotype; MP:0005397 hematopoietic system phenotype; MP:0005375 adipose tissue phenotype		OMIM ID:611922 Gap junction protein, delta-4			Electrocardiography;Trypanosoma cruzi					Colorectal Carcinoma	4	9	[{"UniProt":"Q96KN9","EnsemblGene":["ENSG00000177291"],"EnsemblTrans":[["ENST00000321660","ENSP00000315070","principal1"]],"RefSeq":[["NM_153368","NP_699199","VALIDATED"]],"UCSC":["uc001iyy.1"],"SwissProt":["CXD4_HUMAN"]}]		Distribution: Detected in some; Specificity: Tissue enhanced	antibody: Most of the normal cells showed moderate to strong nuclear membrane immunoreactivity. Hepatocytes was negative. Cells in CNS and squamous epithelia were strongly stained.; Nuclear membranous positivity.	Antibody: A majority of malignant cells displayed moderate nuclear membrane positivity. A few malignant gliomas were strongly stained. Several hepatocellular carcinomas, testicular and pancreatic cancers were weakly stained or negative.
		Cdc42ep5	148170	CDC42EP5	Borg3|CEP5	protein-coding	CDC42 effector protein 5	Cell division control protein 42 (CDC42), a small Rho GTPase, regulates the formation of F-actin-containing structures through its interaction with the downstream effector proteins. The protein encoded by this gene is a member of the Borg (binder of Rho GTPases) family of CDC42 effector proteins. Borg family proteins contain a CRIB (Cdc42/Rac interactive-binding) domain. They bind to CDC42 and re…	chr19:54473296-54465026	GO:0031274 positive regulation of pseudopodium assembly;GO:0031272 regulation of pseudopodium assembly;GO:0031269 pseudopodium assembly	[GO:0005575] cellular_component; [GO:0005737] cytoplasm; [GO:0005622] intracellular; [GO:0043226] organelle; [GO:0005856] cytoskeleton; [GO:0005886] plasma membrane; [GO:0003674] molecular_function; [GO:0019899] enzyme binding; [GO:0005829] cytosol; [GO:0008150] biological_process; [GO:0022607] cellular component assembly; [GO:0007165] signal transduction; [GO:0048856] anatomical structure develo…	GO:0005856 cytoskeleton;GO:0012505 endomembrane system;GO:0005829 cytosol	GO:0017049 GTP-Rho binding;GO:0017048 Rho GTPase binding;GO:0017016 Ras GTPase binding		Predicted intracellular proteins	[IPR000095] CRIB domain; [IPR029273] Cdc42 effector							principal1		MP:0010771 integument phenotype; MP:0001186 pigmentation phenotype		OMIM ID:609171 Cdc42 effector protein 5		Cholesterol, LDL						Allergic rhinitis (disorder)	1	9	[{"UniProt":"Q6NZY7","EnsemblGene":["ENSG00000167617","ENSG00000273622","ENSG00000273633","ENSG00000278444"],"EnsemblTrans":[["ENST00000301200","ENSP00000301200","principal1"],["ENST00000611094","ENSP00000484985",""],["ENST00000617756","ENSP00000484158",""],["ENST00000619217","ENSP00000479726",""]],"RefSeq":[["NM_145057","NP_659494","REVIEWED"]],"UCSC":["uc002qfz.3"],"SwissProt":["BORG3_HUMAN"]}]	stomach	Distribution: Detected in many; Specificity: Tissue enhanced	antibody: Glandular cells in stomach, small intestine, most endothelial cells, subsets of renal tubules and subsets of cells in seminiferus ducts of testis showed strong cytoplasmic positivity. Gastric glands showed additional membranous staining. Cilia in fallopian tubes were moderately stained. Remaining normal tissues were negative.; Cytoplasmic expression in several tissues, most abundant in …	Antibody: A few mucinous cystadenocarcinomas of ovary and fraction of tumor cells in a few pancreatic cancers showed moderate cytoplasmic and/or membranous positivity. A fraction of tumor cells in one case of hepatocellular carcinoma displayed strong cytoplasmic staining. Remaining cancer tissues were negative.
		Zfp521	225207	ZNF521	EHZF|Evi3	protein-coding	zinc finger protein 521		chr18:25352194-25061924	GO:0048663 neuron fate commitment;GO:0045165 cell fate commitment;GO:0030182 neuron differentiation	[GO:0003674] molecular_function; [GO:0005575] cellular_component; [GO:0005622] intracellular; [GO:0043226] organelle; [GO:0005634] nucleus; [GO:0043167] ion binding; [GO:0003677] DNA binding; [GO:0008150] biological_process; [GO:0048856] anatomical structure development; [GO:0030154] cell differentiation	GO:0005634 nucleus;GO:0043231 intracellular membrane-bounded organelle;GO:0043227 membrane-bounded organelle	GO:0001228 DNA-binding transcription activator activity, RNA polymerase II-specific;GO:0019904 protein domain specific binding;GO:0000978 RNA polymerase II proximal promoter sequence-specific DNA binding		Predicted intracellular proteins; Disease related genes; Transcription factors:Zinc-coordinating DNA-binding domains; Cancer-related genes	[IPR013087] Zinc finger C2H2-type; [IPR036236] Zinc finger C2H2 superfamily	Nucleoplasm (reliability'])						principal1		MP:0005367 renal/urinary system phenotype; MP:0005370 liver/biliary system phenotype; MP:0005385 cardiovascular system phenotype; MP:0010768 mortality/aging; MP:0005384 cellular phenotype; MP:0005378 growth/size/body region phenotype; MP:0005386 behavior/neurological phenotype; MP:0005387 immune system phenotype; MP:0003631 nervous system phenotype; MP:0005390 skeleton phenotype; MP:0005397 hemat…		OMIM ID:610974 Zinc finger protein 521		Child Development Disorders, Pervasive;Cholesterol, LDL;Hip;Leukoaraiosis;Personality;Personality Inventory;Platelet Function Tests;Receptors, Interleukin-6;Waist-Hip Ratio	Anticonvulsants;Arthritis, Juvenile;Body Weight;DNA, Mitochondrial;Electrocardiography;Motor Activity;Periodontitis;Polychlorinated Biphenyls;Schizophrenia;Selenium;Sulfonylurea Compounds;Urinary Incontinence					Urge Incontinence; Infiltrating Bladder Urothelial Carcinoma; Urgency of micturition; Adult Lymphoblastic Lymphoma; Childhood Lymphoblastic Lymphoma; Precursor cell lymphoblastic lymphoma; Hereditary hemochromatosis; Alzheimer Disease, Late Onset; Precursor B-cell lymphoblastic leukemia; Adult Medulloblastoma; Childhood Medulloblastoma; Systolic Pressure; mathematical ability; Adult Acute Lymphoc…	18	34	[{"UniProt":"Q96K83","EnsemblGene":["ENSG00000198795"],"EnsemblTrans":[["ENST00000361524","ENSP00000354794","principal1"],["ENST00000538137","ENSP00000440768","principal1"]],"RefSeq":[["NM_001308225","NP_001295154","VALIDATED"],["NM_015461","NP_056276","VALIDATED"],["XM_011525911","XP_011524213","MODEL"],["XM_017025698","XP_016881187","MODEL"]],"UCSC":["uc002kvk.3"],"SwissProt":["ZN521_HUMAN"]},{…		Distribution: Detected in all; Specificity: Tissue enhanced	antibody: Most normal tissues showed moderate nuclear and additional cytoplasmic positivity. The gastrointestinal tract, placenta, urothelium, squamous epithelium, reaction center cells in lymph node and tonsil displayed strong immunoreactivity.; Nuclear expression in most tissues.	Antibody: Most cancer tissues showed moderate nuclear and additional cytoplasmic positivity. Several squamous cell carcinomas in cervix and urothelial cancers showed strong positivity. Prostate and breast cancers were mainly negative.
		Porcn	64840	PORCN	DHOF|FODH|MG61|PORC|PPN	protein-coding	porcupine O-acyltransferase	This gene belongs to the evolutionarily conserved porcupine (Porc) gene family. Genes of the porcupine family encode endoplasmic reticulum proteins with multiple transmembrane domains. Porcupine proteins are involved in the processing of Wnt (wingless and int homologue) proteins. Disruption of this gene is associated with focal dermal hypoplasia, and the encoded protein has been implicated in can…	chrX:48508992-48520814	GO:0045234 protein palmitoleylation;GO:0061355 Wnt protein secretion;GO:0018345 protein palmitoylation	[GO:0005575] cellular_component; [GO:0003674] molecular_function; [GO:0005737] cytoplasm; [GO:0005622] intracellular; [GO:0043226] organelle; [GO:0005783] endoplasmic reticulum; [GO:0016746] transferase activity, transferring acyl groups; [GO:0007165] signal transduction; [GO:0008150] biological_process; [GO:0007267] cell-cell signaling; [GO:0006464] cellular protein modification process; [GO:000…	GO:0032281 AMPA glutamate receptor complex;GO:0008328 ionotropic glutamate receptor complex;GO:0098878 neurotransmitter receptor complex	GO:1990698 palmitoleoyltransferase activity;GO:0017147 Wnt-protein binding;GO:0016747 transferase activity, transferring acyl groups other than amino-acyl groups		Potential drug targets; Transporters:Accessory Factors Involved in Transport; Disease related genes	[IPR004299] Membrane bound O-acyl transferase, MBOAT	Vesicles (reliability'])			yes	yes			yes	MP:0005367 renal/urinary system phenotype; MP:0010768 mortality/aging; MP:0005378 growth/size/body region phenotype; MP:0005381 digestive/alimentary phenotype; MP:0005389 reproductive system phenotype; MP:0003631 nervous system phenotype; MP:0005391 vision/eye phenotype; MP:0005371 limbs/digits/tail phenotype; MP:0005390 skeleton phenotype; MP:0005379 endocrine/exocrine gland phenotype; MP:001077…	[ORPHA:2092] FOCAL DERMAL HYPOPLASIA	OMIM ID:300651 Porcupine o-acyltransferase	Global developmental delay; Focal dermal hypoplasia			[305600] FOCAL DERMAL HYPOPLASIA	Clinvar: phenotype not specified: likely pathogenic,pathogenic; Focal dermal hypoplasia: likely pathogenic,pathogenic	HP:0006638:Midclavicular aplasia; HP:0011847:Giant cell tumor of bone; HP:0007546:Linear hyperpigmentation; HP:0010740:Osteopathia striata; HP:0004930:Abnormality of the pulmonary vasculature; HP:0006608:Midclavicular hypoplasia; HP:0030037:Bifid ureter; HP:0003191:Cleft ala nasi; HP:0001018:Abnormal palmar dermatoglyphics; HP:0000370:Abnormality of the middle ear; HP:0000066:Labial hypoplasia; H…		Midclavicular aplasia; Abnormality of the pulmonary vasculature; Osteopathia striata; Midclavicular hypoplasia; Bifid ureter; Cleft ala nasi; Linear hyperpigmentation; Abnormal palmar dermatoglyphics; Abnormality of the middle ear; Focal Dermal Hypoplasia; Pentalogy of Cantrell; Abnormal adipose tissue morphology; Labial hypoplasia; Reticular hyperpigmentation; Patchy alopecia; Chondrodysplasia p…	27	45	[{"UniProt":"Q9H237","EnsemblGene":["ENSG00000102312"],"RefSeq":[["XM_006724546","XP_006724609"],["XM_011543948","XP_011542250"],["XM_017029736","XP_016885225"]],"SwissProt":["PORCN_HUMAN"]}]		Distribution: Detected in all; Specificity: Low tissue specificity	Cytoplasmic expression in several tissues, mainly in adrenal gland, CNS and seminal vesicle.		(M5493)WNT SIGNALING	(ko04310)Wnt signaling pathway; (hsa04310)Wnt signaling pathway
		Actc1	70	ACTC1	ACTC|ASD5|CMD1R|CMH11|LVNC4	protein-coding	actin alpha cardiac muscle 1	Actins are highly conserved proteins that are involved in various types of cell motility. Polymerization of globular actin (G-actin) leads to a structural filament (F-actin) in the form of a two-stranded helix. Each actin can bind to four others. The protein encoded by this gene belongs to the actin family which is comprised of three main groups of actin isoforms, alpha, beta, and gamma. The alph…	chr15:34795549-34790230	GO:0090131 mesenchyme migration;GO:0030240 skeletal muscle thin filament assembly;GO:0014866 skeletal myofibril assembly	[GO:0005575] cellular_component; [GO:0005737] cytoplasm; [GO:0005622] intracellular; [GO:0003674] molecular_function; [GO:0043167] ion binding; [GO:0043226] organelle; [GO:0005856] cytoskeleton; [GO:0005576] extracellular region; [GO:0005615] extracellular space; [GO:0016887] ATPase activity; [GO:0005829] cytosol; [GO:0008150] biological_process; [GO:0007010] cytoskeleton organization; [GO:004885…	GO:0005869 dynactin complex;GO:0030175 filopodium;GO:0005884 actin filament	GO:0017022 myosin binding;GO:0016887 ATPase activity;GO:0017111 nucleoside-triphosphatase activity		Disease related genes; Predicted intracellular proteins	[IPR004000] Actin family; [IPR004001] Actin, conserved site; [IPR020902] Actin/actin-like conserved site; [IPR043129] ATPase, nucleotide binding domain						yes	principal1		MP:0005385 cardiovascular system phenotype; MP:0010768 mortality/aging; MP:0005369 muscle phenotype; MP:0005384 cellular phenotype; MP:0005378 growth/size/body region phenotype; MP:0003631 nervous system phenotype	[ORPHA:99103] Atrial septal defect ostium secundum type; [ORPHA:154] Familial isolated dilated cardiomyopathy; [ORPHA:54260] Left ventricular noncompaction; [ORPHA:155] NON RARE IN EUROPE: Familial isolated hypertrophic cardiomyopathy	OMIM ID:102540 Actin, alpha, cardiac muscle	Wolff-Parkinson-White pattern; Familial hypertrophic cardiomyopathy 11; Left ventricular noncompaction; Primary dilated cardiomyopathy; Inborn genetic diseases; Primary familial hypertrophic cardiomyopathy; Hypertrophic cardiomyopathy; Cardiomyopathy; Atrial septal defect 5; Dilated cardiomyopathy 1R; Left ventricular noncompaction 4	Cholesterol, LDL;Platelet Function Tests	Suicide		Atrial septal defect 5: pathogenic; Cardiomyopathy: likely pathogenic; Cardiovascular phenotype: likely pathogenic,uncertain significance; Clinvar: phenotype not specified: likely pathogenic,pathogenic,uncertain significance; Dilated cardiomyopathy 1r: likely pathogenic,pathogenic; Familial hypertrophic cardiomyopathy 11: likely pathogenic,pathogenic,uncertain significance; Inborn genetic disease…	HP:0001723:Restrictive cardiomyopathy; HP:0030682:Left ventricular noncompaction; HP:0004308:Ventricular arrhythmia; HP:0001874:Abnormality of neutrophils; HP:0100578:Lipoatrophy; HP:0001712:Left ventricular hypertrophy; HP:0003457:EMG abnormality; HP:0001644:Dilated cardiomyopathy; HP:0000982:Palmoplantar keratoderma; HP:0011675:Arrhythmia; HP:0001635:Congestive heart failure; HP:0003198:Myopath…		Atrial Septal Defect 5; CARDIOMYOPATHY, DILATED, 1R; Cardiomyopathy, Familial Hypertrophic, 11; LEFT VENTRICULAR NONCOMPACTION 4; Ametropia; Apical hypertrophic cardiomyopathy; Juvenile Absence Epilepsy; CARDIOMYOPATHY, FAMILIAL RESTRICTIVE, 1 (disorder); Left ventricular noncompaction; Chagas Cardiomyopathy; Ostium secundum atrial septal defect; Left ventricular noncompaction cardiomyopathy; Myo…	43	205	[{"UniProt":"P68032","EnsemblGene":["ENSG00000159251"],"EnsemblTrans":[["ENST00000290378","ENSP00000290378","principal1"]],"RefSeq":[["NM_005159","NP_005150","REVIEWED"]],"UCSC":["uc001ziu.2"],"SwissProt":["ACTC_HUMAN"]},{"UniProt":"B3KPP5","RefSeq":[["NM_005159","NP_005150","REVIEWED"]],"SwissProt":["B3KPP5_HUMAN"]}]	heart	Distribution: Detected in some; Specificity: Tissue enriched	Selective cytoplasmic expression in heart, skeletal and smooth muscle.; antibody: Strong cytoplasmic and membranous staining was observed in cardiac myocytes. Strong positivity was also observed in subsets of smooth and skeletal muscle cells. Remaining normal tissues were in general negative.	Antibody: Fractions of cells in a few urothelial cancers showed moderate to strong cytoplasmic immunoreactivity. Remaining tumors were basically negative.		(ko04260)Cardiac muscle contraction; (ko05410)Hypertrophic cardiomyopathy (HCM); (hsa05410)Hypertrophic cardiomyopathy			(M5909)HALLMARK MYOGENESIS; (M5915)HALLMARK APICAL JUNCTION; (M5956)HALLMARK KRAS SIGNALING DN
		Adgrg3	222487	ADGRG3	GPR97|PB99|PGR26	protein-coding	adhesion G protein-coupled receptor G3		chr16:57663998-57689378	GO:0032792 negative regulation of CREB transcription factor activity;GO:1901223 negative regulation of NIK/NF-kappaB signaling;GO:1901222 regulation of NIK/NF-kappaB signaling	[GO:0007165] signal transduction; [GO:0008150] biological_process; [GO:0005575] cellular_component; [GO:0003674] molecular_function; [GO:0005886] plasma membrane; [GO:0006810] transport; [GO:0002376] immune system process; [GO:0016192] vesicle-mediated transport; [GO:0005737] cytoplasm; [GO:0005622] intracellular; [GO:0043226] organelle; [GO:0031410] cytoplasmic vesicle; [GO:0040011] locomotion; …	GO:0035579 specific granule membrane;GO:0042581 specific granule;GO:0030667 secretory granule membrane	GO:0004930 G protein-coupled receptor activity;GO:0004888 transmembrane signaling receptor activity;GO:0038023 signaling receptor activity		G-protein coupled receptors:Family 2 (B) receptors; G-protein coupled receptors:GPCRs excl olfactory receptors	[IPR000203] GPS motif; [IPR000832] GPCR, family 2, secretin-like; [IPR003910] GPCR, family 2, orphan receptor, GPR1/GPR3/GPR5; [IPR017981] GPCR, family 2-like				yes	yes	yes	principal3	yes	MP:0005384 cellular phenotype; MP:0005387 immune system phenotype; MP:0005397 hematopoietic system phenotype		OMIM ID:618441 Adhesion g protein-coupled receptor g3		Stroke						Acute Kidney Tubular Necrosis; CNS disorder; Encephalomyelitis; Autoimmune Diseases	3	15	[{"UniProt":"Q86Y34","EnsemblGene":["ENSG00000182885"],"EnsemblTrans":[["ENST00000333493","ENSP00000332900","principal3"]],"RefSeq":[["NM_001308360","NP_001295289","VALIDATED"],["NM_170776","NP_740746","VALIDATED"]],"UCSC":["uc002emh.4"],"SwissProt":["AGRG3_HUMAN"]},{"UniProt":"F8W8F7","EnsemblGene":["ENSG00000182885"],"EnsemblTrans":[["ENST00000450388","ENSP00000404803","alternative2"]],"RefSeq"…	blood	Distribution: Detected in many; Specificity: Tissue enhanced	antibody: Normal tissues showed moderate to strong cytoplasmic positivity.; Estimation of protein expression could not be performed. View primary data.	Antibody: Most of the malignant cells showed moderate cytoplasmic positivity. Several hepatocellular carcinomas along with a few seminomas, non-Hodgkins lymphomas, colorectal, pancreatic and ovarian cancers were strongly stained. Several basal cell carcinomas were weakly stained.
		Npr3	4883	NPR3	ANP-C|ANPR-C|ANPRC|C5orf23|GUCY2B|NPR-C|NPRC	protein-coding	natriuretic peptide receptor 3	This gene encodes one of three natriuretic peptide receptors. Natriutetic peptides are small peptides which regulate blood volume and pressure, pulmonary hypertension, and cardiac function as well as some metabolic and growth processes. The product of this gene encodes a natriuretic peptide receptor responsible for clearing circulating and extracellular natriuretic peptides through endocytosis of…	chr5:32689076-32791720	GO:0002158 osteoclast proliferation;GO:0030157 pancreatic juice secretion;GO:0035810 positive regulation of urine volume	[GO:0005575] cellular_component; [GO:0043226] organelle; [GO:0005576] extracellular region; [GO:0005615] extracellular space; [GO:0008150] biological_process; [GO:0048856] anatomical structure development; [GO:0003013] circulatory system process; [GO:0042592] homeostatic process; [GO:0032991] protein-containing complex; [GO:0003674] molecular_function; [GO:0005886] plasma membrane; [GO:0043167] i…	GO:0005887 integral component of plasma membrane;GO:0031226 intrinsic component of plasma membrane;GO:0070062 extracellular exosome	GO:0016941 natriuretic peptide receptor activity;GO:0031404 chloride ion binding;GO:0017046 peptide hormone binding		Predicted intracellular proteins	[IPR001170] Adenylyl cyclase class-4/guanylyl cyclase; [IPR001828] Receptor, ligand binding region; [IPR028082] Periplasmic binding protein-like I	Cytosol (reliability'])			yes	yes			yes	MP:0005367 renal/urinary system phenotype; MP:0005385 cardiovascular system phenotype; MP:0010768 mortality/aging; MP:0005376 homeostasis/metabolism phenotype; MP:0005378 growth/size/body region phenotype; MP:0005386 behavior/neurological phenotype; MP:0005387 immune system phenotype; MP:0005389 reproductive system phenotype; MP:0005377 hearing/vestibular/ear phenotype; MP:0005371 limbs/digits/ta…		OMIM ID:108962 Natriuretic peptide receptor c		Child Development Disorders, Pervasive;Creatinine;Lipoproteins, VLDL;Platelet Function Tests;Stroke;Triglycerides	Arterial Pressure;Blood Pressure;Body Height;Body Mass Index;Hip;Hypertension;Ovarian Reserve;Waist Circumference	[No disease mim] Enhanced Growth and Connective Tissue Abnormalities			Nesiritide	Ovarian Reserve; Chronic idiopathic constipation; Chronic abdominal pain; Irritable bowel syndrome with constipation; vascular ischemia; Neurofibromatosis, Type 3, mixed central and peripheral; Congenital secretory diarrhea, sodium type (disorder); POPLITEAL PTERYGIUM SYNDROME, LETHAL TYPE; Functional Gastrointestinal Disorders; Diastolic blood pressure measurement; Dilatation of aorta; Myocardia…	46	78	[{"UniProt":"P17342","EnsemblGene":["ENSG00000113389"],"SwissProt":["ANPRC_HUMAN"]},{"UniProt":"Q60I31","RefSeq":[["NM_000908","NP_000899","REVIEWED"]],"UCSC":["uc003jhu.4"],"SwissProt":["Q60I31_HUMAN"]},{"UniProt":"A8K4A5","RefSeq":[["NM_001204375","NP_001191304","REVIEWED"]],"SwissProt":["A8K4A5_HUMAN"]}]	ovary;bone_marrow;kidney	Distribution: Detected in many; Specificity: Tissue enhanced	Membranous expression in kidney, cytoplasmic expression in few other tissues.; antibody: Subset of salivary glands showed strong cytoplasmic positivity. Subset of cells in renal tubules, adrenal glands and hematopoietic cells displayed moderate immunoreactivity. Other normal tissues were in general negative.	Antibody: Several cases of renal cell carcinomas showed weak to moderate cytoplasmic and/or membranous staining. Other cancer tissues were in general negative.
		Ptgir	5739	PTGIR	IP|PRIPR	protein-coding	prostaglandin I2 receptor	The protein encoded by this gene is a member of the G-protein coupled receptor family 1 and has been shown to be a receptor for prostacyclin. Prostacyclin, the major product of cyclooxygenase in macrovascular endothelium, elicits a potent vasodilation and inhibition of platelet aggregation through binding to this receptor. [provided by RefSeq, Jul 2008]	chr19:46625097-46610040	GO:0010642 negative regulation of platelet-derived growth factor receptor signaling pathway;GO:0010640 regulation of platelet-derived growth factor receptor signaling pathway;GO:0048008 platelet-derived growth factor receptor signaling pathway	[GO:0007165] signal transduction; [GO:0008150] biological_process; [GO:0005575] cellular_component; [GO:0003674] molecular_function; [GO:0008283] cell population proliferation; [GO:0005886] plasma membrane; [GO:0005737] cytoplasm; [GO:0005622] intracellular; [GO:0005829] cytosol; [GO:0006950] response to stress; [GO:0007267] cell-cell signaling; [GO:0042592] homeostatic process; [GO:0019899] enzy…	GO:0005887 integral component of plasma membrane;GO:0031226 intrinsic component of plasma membrane;GO:0044459 plasma membrane part	GO:0016501 prostacyclin receptor activity;GO:0004955 prostaglandin receptor activity;GO:0004954 prostanoid receptor activity		FDA approved drug targets:Small molecule drugs; G-protein coupled receptors:GPCRs excl olfactory receptors; Predicted intracellular proteins	[IPR000276] G protein-coupled receptor, rhodopsin-like; [IPR000370] Prostacyclin (prostanoid IP) receptor; [IPR008365] Prostanoid receptor; [IPR017452] GPCR, rhodopsin-like, 7TM				yes	yes		principal1	yes	MP:0005385 cardiovascular system phenotype; MP:0010768 mortality/aging; MP:0005376 homeostasis/metabolism phenotype; MP:0005386 behavior/neurological phenotype; MP:0005387 immune system phenotype; MP:0005397 hematopoietic system phenotype; MP:0010771 integument phenotype		OMIM ID:600022 Prostaglandin i2 receptor			Colitis, Ulcerative;Inflammatory Bowel Diseases				Treprostinil; Iloprost; Dinoprost tromethamine; Epoprostenol; Beraprost; Selexipag	Asthma, Aspirin-Induced; von Willebrand Disease, Type 1; Raynaud Phenomenon; Chronic thromboembolic pulmonary hypertension; Atherothrombosis; Venous Thrombosis; Hyperplasia; Acute Megakaryocytic Leukemias; Idiopathic pulmonary hypertension; Deep Vein Thrombosis; Coughing; Congenital heart disease; early pregnancy; Pulmonary arterial hypertension; Patent ductus arteriosus; Heart Diseases; Cerebral…	57	94	[{"UniProt":"P43119","EnsemblGene":["ENSG00000160013"],"EnsemblTrans":[["ENST00000291294","ENSP00000291294","principal1"]],"RefSeq":[["NM_000960","NP_000951","REVIEWED"]],"UCSC":["uc002pex.4"],"SwissProt":["PI2R_HUMAN"]}]		Distribution: Detected in many; Specificity: Tissue enhanced			(M99)PID TXA2PATHWAY	(ko04270)Vascular smooth muscle contraction; (hsa04611)Platelet activation; (hsa04270)Vascular smooth muscle contraction			(M5932)HALLMARK INFLAMMATORY RESPONSE	(M22003)BIOCARTA EICOSANOID PATHWAY
		Ankrd2	26287	ANKRD2	ARPP	protein-coding	ankyrin repeat domain 2	This gene encodes a protein that belongs to the muscle ankyrin repeat protein (MARP) family. A similar gene in rodents is a component of a muscle stress response pathway and plays a role in the stretch-response associated with slow muscle function. Alternative splicing results in multiple transcript variants encoding different isoforms. [provided by RefSeq, Mar 2014]	chr10:97572441-97583884	GO:0043619 regulation of transcription from RNA polymerase II promoter in response to oxidative stress;GO:0010832 negative regulation of myotube differentiation;GO:2000291 regulation of myoblast proliferation	[GO:0003674] molecular_function; [GO:0005575] cellular_component; [GO:0005622] intracellular; [GO:0043226] organelle; [GO:0005634] nucleus; [GO:0005737] cytoplasm; [GO:0005829] cytosol; [GO:0008150] biological_process; [GO:0048856] anatomical structure development; [GO:0005654] nucleoplasm; [GO:0034641] cellular nitrogen compound metabolic process; [GO:0009058] biosynthetic process; [GO:0030154] …	GO:0000791 euchromatin;GO:0016605 PML body;GO:0031674 I band	GO:0061629 RNA polymerase II sequence-specific DNA-binding transcription factor binding;GO:0043422 protein kinase B binding;GO:0031432 titin binding		Predicted intracellular proteins	[IPR002110] Ankyrin repeat; [IPR020683] Ankyrin repeat-containing domain; [IPR036770] Ankyrin repeat-containing domain superfamily	Vesicles (reliability'])						alternative2		MP:0005369 muscle phenotype; MP:0005387 immune system phenotype		OMIM ID:610734 Ankyrin repeat domain-containing protein 2		Angiography;Blood Pressure;Echocardiography;Respiratory Function Tests;Temporal Lobe						Autosomal Dominant Emery-Dreifuss Muscular Dystrophy (disorder); Dysferlinopathy; Muscular Dystrophy, Emery-Dreifuss; Rhabdomyosarcoma; Amyotrophic Lateral Sclerosis; Renal Cell Carcinoma; Diabetes; Diabetes Mellitus	14	32	[{"UniProt":"A0A0A0MRN9","EnsemblGene":["ENSG00000165887"],"EnsemblTrans":[["ENST00000370655","ENSP00000359689","alternative2"]],"RefSeq":[["NM_001346793","NP_001333722","REVIEWED"]],"UCSC":["uc057vfz.1"],"SwissProt":["A0A0A0MRN9_HUMAN"]},{"UniProt":"Q5T457","EnsemblGene":["ENSG00000165887"],"EnsemblTrans":[["ENST00000455090","ENSP00000403114",""]],"RefSeq":[["NM_001291219","NP_001278148","REVIEW…	muscle	Distribution: Detected in some; Specificity: Tissue enriched	Selective cytoplasmic expression in myocytes.; antibody: Cardiac and skeletal myocytes showed moderate to strong cytoplasmic positivity. A subset of renal tubules exhibited moderate cytoplasmic and nuclear staining. Remaining normal tissues were negative.	Antibody: A few cases of endometrial, ovarian and thyroid cancers showed moderate to strong cytoplasmic and nuclear staining in a subset of tumor cells. Remaining malignant cells along with stromal cells were negative.					(M5909)HALLMARK MYOGENESIS
		Actg1	71	ACTG1	ACT|ACTG|DFNA20|DFNA26|HEL-176	protein-coding	actin gamma 1	Actins are highly conserved proteins that are involved in various types of cell motility and in maintenance of the cytoskeleton. Three main groups of actin isoforms have been identified in vertebrate animals: alpha, beta, and gamma. The alpha actins are found in muscle tissues and are a major constituent of the contractile apparatus. The beta and gamma actins co-exist in most cell types as compon…	chr17:81512799-81509971	GO:1902396 protein localization to bicellular tight junction;GO:0098974 postsynaptic actin cytoskeleton organization;GO:0099188 postsynaptic cytoskeleton organization	[GO:0008150] biological_process; [GO:0040011] locomotion; [GO:0048870] cell motility; [GO:0005575] cellular_component; [GO:0005622] intracellular; [GO:0043226] organelle; [GO:0005634] nucleus; [GO:0005737] cytoplasm; [GO:0003674] molecular_function; [GO:0043167] ion binding; [GO:0005856] cytoskeleton; [GO:0005886] plasma membrane; [GO:0005576] extracellular region; [GO:0005615] extracellular spac…	GO:0097433 dense body;GO:0044305 calyx of Held;GO:0031941 filamentous actin	GO:0098973 structural constituent of postsynaptic actin cytoskeleton;GO:0005522 profilin binding;GO:0099186 structural constituent of postsynapse		Disease related genes; Predicted intracellular proteins	[IPR004000] Actin family; [IPR004001] Actin, conserved site; [IPR020902] Actin/actin-like conserved site; [IPR043129] ATPase, nucleotide binding domain						yes	principal1		MP:0010768 mortality/aging; MP:0005369 muscle phenotype; MP:0005378 growth/size/body region phenotype; MP:0005386 behavior/neurological phenotype; MP:0003631 nervous system phenotype; MP:0005377 hearing/vestibular/ear phenotype; MP:0010771 integument phenotype; MP:0005380 embryo phenotype	[ORPHA:90635] Autosomal dominant non-syndromic sensorineural deafness type DFNA; [ORPHA:2995] Baraitser-Winter cerebrofrontofacial syndrome; [ORPHA:98942] Coloboma of choroid and retina; [ORPHA:98944] Coloboma of iris	OMIM ID:102560 Actin, gamma-1	Baraitser-Winter Syndrome 2; Microcephaly; Deafness, autosomal dominant 20; Rare genetic deafness; Inborn genetic diseases			[No disease mim] Baraitser-Winter syndrome	Baraitser-winter syndrome 2: likely pathogenic,not provided,pathogenic; Clinvar: phenotype not specified: likely pathogenic,not provided,pathogenic; Deafness, autosomal dominant 20: likely pathogenic,not provided,pathogenic; Inborn genetic diseases: pathogenic; Nonsyndromic hearing loss and deafness: likely pathogenic,not provided,pathogenic	HP:0030502:Retinoschisis; HP:0040188:Osteochondrosis; HP:0100308:Cerebral cortical hemiatrophy; HP:0009942:Duplication of thumb phalanx; HP:0011462:Young adult onset; HP:0012905:Euryblepharon; HP:0001100:Heterochromia iridis; HP:0002000:Short columella; HP:0000588:Optic nerve coloboma; HP:0001339:Lissencephaly; HP:0000437:Depressed nasal tip; HP:0007227:Macrogyria; HP:0100540:Palpebral edema; HP:…	Copper; Artenimol	Audiogram shows sloping configuration; BARAITSER-WINTER SYNDROME 2; Deafness (in some patients); Deafness, Autosomal Dominant 20; Deafness, profound, by 6th decade; Enlarged ventricles (in some patients); Eye coloboma (in some patients); Hearing loss begins with loss of high frequencies; Heart defect (in some patients); Hypertelorism/telecanthus; Kyphosis/scoliosis (in some patients); Large, squa…	42	275	[{"UniProt":"P63261","EnsemblGene":["ENSG00000184009"],"EnsemblTrans":[["ENST00000573283","ENSP00000458435","principal1"],["ENST00000575087","ENSP00000459124","principal1"],["ENST00000575842","ENSP00000458162","principal1"],["ENST00000576544","ENSP00000461672",""],["ENST00000615544","ENSP00000477968","principal1"],["ENST00000644774","ENSP00000493648","principal1"]],"RefSeq":[["NM_001199954","NP_0…		Distribution: Detected in all; Specificity: Low tissue specificity	antibody: Most normal tissues showed moderate to strong membranous and/or cytoplasmic positivity. Hepatocytes, Purkinje cells and glial cells were negative.; Cytoplasmic expression of myoepithelial cells.	Antibody: A majority of cancer tissues showed moderate to strong membranous and/or cytoplasmic positivity.	(M16801)SIG REGULATION OF THE ACTIN CYTOSKELETON BY RHO GTPASES	(ko05110)Vibrio cholerae infection; (hsa05110)Vibrio cholerae infection; (ko05130)Pathogenic Escherichia coli infection			(M5892)HALLMARK CHOLESTEROL HOMEOSTASIS; (M5915)HALLMARK APICAL JUNCTION	(M13968)BIOCARTA HIVNEF PATHWAY
		Tmem119	338773	TMEM119	OBIF	protein-coding	transmembrane protein 119		chr12:108598099-108589846	GO:1903012 positive regulation of bone development;GO:0033690 positive regulation of osteoblast proliferation;GO:0045779 negative regulation of bone resorption	[GO:0008150] biological_process; [GO:0006464] cellular protein modification process; [GO:0005575] cellular_component; [GO:0005737] cytoplasm; [GO:0005622] intracellular; [GO:0043226] organelle; [GO:0005783] endoplasmic reticulum; [GO:0005886] plasma membrane; [GO:0030154] cell differentiation; [GO:0048856] anatomical structure development; [GO:0000003] reproduction; [GO:0003674] molecular_functio…	GO:0005789 endoplasmic reticulum membrane;GO:0098827 endoplasmic reticulum subcompartment;GO:0042175 nuclear outer membrane-endoplasmic reticulum membrane network	GO:0003674 molecular_function		Predicted intracellular proteins	[IPR031453] Transmembrane protein 119				yes	yes		principal1	yes	MP:0005376 homeostasis/metabolism phenotype; MP:0005384 cellular phenotype; MP:0005378 growth/size/body region phenotype; MP:0005386 behavior/neurological phenotype; MP:0005389 reproductive system phenotype; MP:0005390 skeleton phenotype; MP:0005379 endocrine/exocrine gland phenotype										Bone Cysts; Creutzfeldt-Jakob Disease, Sporadic; MYOTONIC DYSTROPHY 1; Tonometry; Cerebral Infarction; Neurodegenerative Disorders; Multiple Sclerosis; Childhood Osteosarcoma; Osteosarcoma of bone; Osteosarcoma; Diabetes Mellitus; Alzheimer's Disease; Carcinogenesis; Neoplasm Metastasis; Tumor Cell Invasion; Neoplasms	3	12	[{"UniProt":"Q4V9L6","EnsemblGene":["ENSG00000183160"],"EnsemblTrans":[["ENST00000392806","ENSP00000376553","principal1"]],"RefSeq":[["NM_181724","NP_859075","VALIDATED"],["XM_011538271","XP_011536573","MODEL"]],"UCSC":["uc001tng.4"],"SwissProt":["TM119_HUMAN"]}]		Distribution: Detected in many; Specificity: Low tissue specificity	antibody: Most normal tissues displayed weak to moderate nuclear and/or cytoplasmic positivity. Thyroid, heart myocytes and cells in germinal centers were strongly stained. Small intestine, liver and renal tubules were negative. Positivity observed in extra-cellular matrix.; Cytoplasmic expression in several cell types, distinct expression in follicular dendritic cells and in microglia. Also expr…	Antibody: Weak to moderate nuclear and/or occasional cytoplasmic immunoreactivity was observed in most cancer tissues. Several testicular cancers were strongly stained. Lymphomas, renal cancers and hepatocellular carcinomas were generally negative.
		Tuba1b	10376	TUBA1B	K-ALPHA-1	protein-coding	tubulin alpha 1b		chr12:49131395-49127782	GO:0071353 cellular response to interleukin-4;GO:0070670 response to interleukin-4;GO:0030705 cytoskeleton-dependent intracellular transport	[GO:0003674] molecular_function; [GO:0043167] ion binding; [GO:0008150] biological_process; [GO:0005575] cellular_component; [GO:0005622] intracellular; [GO:0043226] organelle; [GO:0005856] cytoskeleton; [GO:0003924] GTPase activity; [GO:0005198] structural molecule activity; [GO:0007010] cytoskeleton organization; [GO:0005737] cytoplasm; [GO:0007049] cell cycle; [GO:0000278] mitotic cell cycle; …	GO:0005881 cytoplasmic microtubule;GO:0045121 membrane raft;GO:0098857 membrane microdomain	GO:0003725 double-stranded RNA binding;GO:0005200 structural constituent of cytoskeleton;GO:0031625 ubiquitin protein ligase binding		Predicted intracellular proteins	[IPR000217] Tubulin; [IPR002452] Alpha tubulin; [IPR003008] Tubulin/FtsZ, GTPase domain; [IPR008280] Tubulin/FtsZ, C-terminal; [IPR017975] Tubulin, conserved site; [IPR018316] Tubulin/FtsZ, 2-layer sandwich domain; [IPR023123] Tubulin, C-terminal; [IPR036525] Tubulin/FtsZ, GTPase domain superfamily; [IPR037103] Tubulin/FtsZ, C-terminal domain superfamily	Microtubules (reliability'])										OMIM ID:602530 Tubulin, alpha-1b							Epothilone D; Patupilone; CYT997; 2-MERCAPTO-N-[1,2,3,10-TETRAMETHOXY-9-OXO-5,6,7,9-TETRAHYDRO-BENZO[A]HEPTALEN-7-YL]ACETAMIDE	Charcot-Marie-Tooth disease, Type 2D; Finnish congenital nephrotic syndrome; Agyria; CRANIOSYNOSTOSIS, TYPE 2; Neuropsychiatric Systemic Lupus Erythematosus; Chills; Cockayne Syndrome, Type II; INCLUSION BODY MYOPATHY WITH EARLY-ONSET PAGET DISEASE AND FRONTOTEMPORAL DEMENTIA; Giardiasis; Paracoccidioidomycosis; Dysautonomia, Familial; Polycystic Kidney - body part; stage, prostate cancer; Malari…	24	202	[{"UniProt":"P68363","EnsemblGene":["ENSG00000123416"],"SwissProt":["TBA1B_HUMAN"]}]		Distribution: Detected in all; Specificity: Low tissue specificity	antibody: Most normal tissues showed weak to moderate cytoplasmic positivity. Cells of placenta were strongly stained. Hepatocytes, islets of Langerhans, renal glomeruli, spleen, heart and skeletal muscle were mainly negative.; General cytoplasmic expression.	Antibody: Most malignancies displayed weak to moderate cytoplasmic positivity. Strong immunoreactivity was observed in several cases of malignant gliomas. Most renal cancers and several lung, urothelial and prostate cancers were negative.	(M11)PID PRL SIGNALING EVENTS PATHWAY; (M32)PID HDAC CLASSIII PATHWAY; (M30)PID HDAC CLASSII PATHWAY	(ko05130)Pathogenic Escherichia coli infection; (hsa05130)Pathogenic Escherichia coli infection; (ko04540)Gap junction
		Atp1a2	477	ATP1A2	FHM2|MHP2	protein-coding	ATPase Na+/K+ transporting subunit alpha 2	The protein encoded by this gene belongs to the family of P-type cation transport ATPases, and to the subfamily of Na+/K+ -ATPases. Na+/K+ -ATPase is an integral membrane protein responsible for establishing and maintaining the electrochemical gradients of Na and K ions across the plasma membrane. These gradients are essential for osmoregulation, for sodium-coupled transport of a variety of organ…	chr1:160115759-160143591	GO:0021989 olfactory cortex development;GO:1903280 negative regulation of calcium:sodium antiporter activity;GO:0051941 regulation of amino acid uptake involved in synaptic transmission	[GO:0005575] cellular_component; [GO:0003674] molecular_function; [GO:0043167] ion binding; [GO:0008150] biological_process; [GO:0006810] transport; [GO:0022857] transmembrane transporter activity; [GO:0007165] signal transduction; [GO:0055085] transmembrane transport; [GO:0042592] homeostatic process; [GO:0003013] circulatory system process; [GO:0005886] plasma membrane; [GO:0005737] cytoplasm; …	GO:0005890 sodium:potassium-exchanging ATPase complex;GO:0090533 cation-transporting ATPase complex;GO:0098533 ATPase dependent transmembrane transport complex	GO:1990239 steroid hormone binding;GO:0031402 sodium ion binding;GO:0005391 sodium:potassium-exchanging ATPase activity		Disease related genes; ENZYME proteins:Hydrolases; Enzymes; Potential drug targets; Transporters:Primary Active Transporters	[IPR001757] P-type ATPase; [IPR004014] Cation-transporting P-type ATPase, N-terminal; [IPR005775] P-type ATPase subfamily IIC, subunit alpha; [IPR006068] Cation-transporting P-type ATPase, C-terminal; [IPR008250] P-type ATPase, A domain superfamily; [IPR018303] P-type ATPase, phosphorylation site; [IPR023214] HAD superfamily; [IPR023298] P-type ATPase, transmembrane domain superfamily; [IPR023299…				yes	yes	yes	principal1	yes	MP:0005385 cardiovascular system phenotype; MP:0010768 mortality/aging; MP:0005369 muscle phenotype; MP:0005376 homeostasis/metabolism phenotype; MP:0005378 growth/size/body region phenotype; MP:0005386 behavior/neurological phenotype; MP:0003631 nervous system phenotype; MP:0010771 integument phenotype; MP:0005388 respiratory system phenotype	[ORPHA:2131] ALTERNATING HEMIPLEGIA OF CHILDHOOD; [ORPHA:569] Familial or sporadic hemiplegic migraine	OMIM ID:182340 Atpase, na+/k+ transporting, alpha-2 polypeptide	Epilepsy; Familial hemiplegic migraine; Hydrops fetalis; Abnormality of neuronal migration; Arthrogryposis multiplex congenita; Familial hemiplegic migraine type 2; Polymicrogyria; Inborn genetic diseases; Migraine, familial basilar		olanzapine		Alternating hemiplegia of childhood 1: pathogenic,uncertain significance; Clinvar: phenotype not specified: likely pathogenic,pathogenic,uncertain significance; Epileptic encephalopathy: pathogenic,uncertain significance; Familial hemiplegic migraine: likely pathogenic,pathogenic,uncertain significance; Familial hemiplegic migraine type 2: likely pathogenic,pathogenic,uncertain significance; Inbo…	HP:0012194:Episodic hemiplegia; HP:0200072:Episodic quadriplegia; HP:0001125:Transient unilateral blurring of vision; HP:0002077:Migraine with aura; HP:0002131:Episodic ataxia; HP:0000622:Blurred vision; HP:0002329:Drowsiness; HP:0002301:Hemiplegia; HP:0100022:Abnormality of movement; HP:0001289:Confusion; HP:0002381:Aphasia; HP:0002186:Apraxia; HP:0002357:Dysphasia; HP:0001259:Coma; HP:0000651:D…	Ouabain	Migraine with Prolonged Aura; Migraine, Familial Basilar; Transient neurological symptoms; ALTERNATING HEMIPLEGIA OF CHILDHOOD 1; Episodic hemiplegia; Episodic quadriplegia; MIGRAINE, SPORADIC HEMIPLEGIC; Migraine with Typical Aura; Other forms of migraine; Transient unilateral blurring of vision; Basilar-Type Migraine; Atrial septal aneurysm; Familial migraine; MIGRAINE, FAMILIAL HEMIPLEGIC, 2; …	88	135	[{"UniProt":"P50993","EnsemblGene":["ENSG00000018625"],"EnsemblTrans":[["ENST00000361216","ENSP00000354490","principal1"]],"RefSeq":[["NM_000702","NP_000693","REVIEWED"]],"UCSC":["uc001fvc.4"],"SwissProt":["AT1A2_HUMAN"]},{"UniProt":"A0A0S2Z3W6","RefSeq":[["NM_000702","NP_000693","REVIEWED"]],"SwissProt":["A0A0S2Z3W6_HUMAN"]}]		Distribution: Detected in all; Specificity: Group enriched	Cytoplasmic expression in several tissues, most abundant in CNS.; antibody: Gastric glandular cells and neuropil showed strong cytoplasmic positivity while cells in CNS, testis, duodenum and Islet cells of Langerhans were moderately stained. Most remaining normal tissue were negative.	Antibody: Colorectal cancers displayed weak to moderate cytoplasmic positivity. Most remaning cancer tissues were weakly stained or negative.		(ko04964)Proximal tubule bicarbonate reclamation; (hsa04964)Proximal tubule bicarbonate reclamation; (ko04960)Aldosterone-regulated sodium reabsorption
		Col18a1	80781	COL18A1	GLCC|KNO|KNO1|KS	protein-coding	collagen type XVIII alpha 1 chain	This gene encodes the alpha chain of type XVIII collagen. This collagen is one of the multiplexins, extracellular matrix proteins that contain multiple triple-helix domains (collagenous domains) interrupted by non-collagenous domains. A long isoform of the protein has an N-terminal domain that is homologous to the extracellular part of frizzled receptors. Proteolytic processing at several endogen…	chr21:45405165-45513720	GO:0051599 response to hydrostatic pressure;GO:0001886 endothelial cell morphogenesis;GO:0009415 response to water	[GO:0005575] cellular_component; [GO:0005576] extracellular region; [GO:0005615] extracellular space; [GO:0003674] molecular_function; [GO:0043167] ion binding; [GO:0008150] biological_process; [GO:0007155] cell adhesion; [GO:0032991] protein-containing complex; [GO:0031012] extracellular matrix; [GO:0005198] structural molecule activity; [GO:0030198] extracellular matrix organization; [GO:004322…	GO:0005581 collagen trimer;GO:0005604 basement membrane;GO:0005788 endoplasmic reticulum lumen	GO:0030020 extracellular matrix structural constituent conferring tensile strength;GO:0005201 extracellular matrix structural constituent;GO:0005198 structural molecule activity		Predicted intracellular proteins; Disease related genes; Cancer-related genes:Candidate cancer biomarkers; Cancer-related genes:Mutational cancer driver genes; Predicted secreted proteins	[IPR001791] Laminin G domain; [IPR008160] Collagen triple helix repeat; [IPR010515] Collagenase NC10/endostatin; [IPR013320] Concanavalin A-like lectin/glucanase domain superfamily; [IPR016186] C-type lectin-like/link domain superfamily; [IPR016187] C-type lectin fold; [IPR010363] Domain of unknown function DUF959, collagen XVIII, N-terminal; [IPR020067] Frizzled domain; [IPR035523] Collagen alph…	Golgi apparatus (reliability'])	yes	yes			yes			MP:0005367 renal/urinary system phenotype; MP:0005385 cardiovascular system phenotype; MP:0005376 homeostasis/metabolism phenotype; MP:0005384 cellular phenotype; MP:0005386 behavior/neurological phenotype; MP:0003631 nervous system phenotype; MP:0005391 vision/eye phenotype; MP:0005390 skeleton phenotype; MP:0001186 pigmentation phenotype; MP:0005382 craniofacial phenotype	[ORPHA:1571] Knobloch syndrome	OMIM ID:120328 Collagen, type xviii, alpha-1	Knobloch syndrome 1; Delayed speech and language development; Severe temper tantrums; Stereotypical body rocking; Retinal dystrophy; Severe Myopia; Nystagmus; Cataract (disease); Neuropsychiatric disorder; Progressive neurodegenerative disease; Macular dystrophy; Retinitis pigmentosa	Breast Neoplasms;Creatinine;Ghrelin;Job Satisfaction	Age of Onset;Alzheimer Disease;Hippocampus	[267750] Knobloch Syndrome Type I	Cataract: likely pathogenic; Clinvar: phenotype not specified: likely pathogenic,pathogenic; Knobloch syndrome 1: likely pathogenic,pathogenic; Retinal dystrophy: likely pathogenic	HP:0030037:Bifid ureter; HP:0000585:Band keratopathy; HP:0500087:Peripapillary atrophy; HP:0001104:Macular hypoplasia; HP:0100764:Lymphangioma; HP:0000667:Phthisis bulbi; HP:0007773:Vitreoretinopathy; HP:0001362:Calvarial skull defect; HP:0001651:Dextrocardia; HP:0002085:Occipital encephalocele; HP:0001083:Ectopia lentis; HP:0001595:Abnormal hair morphology; HP:0000608:Macular degeneration; HP:00…		Bronchobiliary fistula; Malignant neoplasm progression; Refractory Nasopharyngeal Carcinoma; Renal involvement in scleroderma; Knobloch Syndrome, Type I; Knobloch syndrome; Rubeosis iridis; Acute dyspnea; Bifid ureter; Peripapillary atrophy; Non-dipping; Corneal Dystrophy, Band-Shaped; Macular hypoplasia; Phthisis bulbi; Chronic left-sided ulcerative colitis; Ultrafiltration failure; Hippocampal …	146	219	[{"UniProt":"P39060","EnsemblGene":["ENSG00000182871"],"RefSeq":[["NM_030582","NP_085059","REVIEWED"],["NM_130444","NP_569711","REVIEWED"],["NM_130445","NP_569712","SUPPRESSED"]],"SwissProt":["COIA1_HUMAN"]},{"UniProt":"D3DSM4","RefSeq":[["NM_130445","NP_569712","SUPPRESSED"]],"SwissProt":["D3DSM4_HUMAN"]},{"UniProt":"D3DSM5","RefSeq":[["NM_030582","NP_085059","REVIEWED"]],"SwissProt":["D3DSM5_HU…		Distribution: Detected in all; Specificity: Tissue enhanced	antibody: A majority of normal tissues were negative. Weak nuclear immunoreactivity was observed in endothelial cells.; Cytoplasmic and nuclear expression in several tissue types.	Antibody: Cancer tissues were in general negative. Weak nuclear immunoreactivity was observed in endothelial cells and some stromal cells.	(M5887)NABA BASEMENT MEMBRANES; (M285)PID HNF3A PATHWAY; (M3005)NABA COLLAGENS	(ko04974)Protein digestion and absorption; (hsa04974)Protein digestion and absorption
		A4galt	53947	A4GALT	A14GALT|A4GALT1|Gb3S|P1|P1PK|PK	protein-coding	alpha 1,4-galactosyltransferase (P blood group)	The protein encoded by this gene catalyzes the transfer of galactose to lactosylceramide to form globotriaosylceramide, which has been identified as the P(k) antigen of the P blood group system. This protein, a type II membrane protein found in the Golgi, is also required for the synthesis of the bacterial verotoxins receptor. Alternatively spliced transcript variants have been found for this gen…	chr22:42721301-42692115	GO:0001575 globoside metabolic process;GO:0001576 globoside biosynthetic process;GO:0006688 glycosphingolipid biosynthetic process	[GO:0005575] cellular_component; [GO:0003674] molecular_function; [GO:0005737] cytoplasm; [GO:0005622] intracellular; [GO:0043226] organelle; [GO:0005794] Golgi apparatus; [GO:0016757] transferase activity, transferring glycosyl groups; [GO:0008150] biological_process; [GO:0006629] lipid metabolic process; [GO:0009058] biosynthetic process; [GO:0061024] membrane organization; [GO:0007009] plasma …	GO:0030173 integral component of Golgi membrane;GO:0031228 intrinsic component of Golgi membrane;GO:0031301 integral component of organelle membrane	GO:0050512 lactosylceramide 4-alpha-galactosyltransferase activity;GO:0015643 toxic substance binding;GO:0035250 UDP-galactosyltransferase activity		ENZYME proteins:Transferases; Enzymes	[IPR007577] Glycosyltransferase, DXD sugar-binding motif; [IPR007652] Alpha 1,4-glycosyltransferase domain; [IPR029044] Nucleotide-diphospho-sugar transferases	Mitochondria (reliability'])			yes	yes		principal1	yes	MP:0010768 mortality/aging; MP:0005376 homeostasis/metabolism phenotype; MP:0005386 behavior/neurological phenotype		OMIM ID:607922 Alpha-1,4-galactosyltransferase		Child Development Disorders, Pervasive;Myocardial Infarction;Personality Inventory				HP:0010970:Blood group antigen abnormality; HP:0000006:Autosomal dominant inheritance		NOR POLYAGGLUTINATION SYNDROME; Cortical Congenital Hyperostosis; Blood group antigen abnormality; African Burkitt's lymphoma; Burkitt Leukemia; Polyuria; Hemolytic-Uremic Syndrome; Hemoglobin measurement; Platelet Component Distribution Width Measurement; Hematocrit procedure; Teratocarcinoma; Acute Megakaryocytic Leukemias; Platelet mean volume determination (procedure); Mean Corpuscular Volume…	27	44	[{"UniProt":"Q9NPC4","EnsemblGene":["ENSG00000128274"],"EnsemblTrans":[["ENST00000249005","ENSP00000249005","principal1"],["ENST00000381278","ENSP00000370678","principal1"],["ENST00000401850","ENSP00000384794","principal1"],["ENST00000642412","ENSP00000494127","principal1"]],"RefSeq":[["NM_001318038","NP_001304967","REVIEWED"],["NM_017436","NP_059132","REVIEWED"],["XM_005261644","XP_005261701","M…	spleen	Distribution: Detected in all; Specificity: Low tissue specificity				(hsa)Glycosphingolipid biosynthesis, globo-series, LacCer => Gb4Cer; (M00068)Glycosphingolipid biosynthesis, globo-series, LacCer => Gb4Cer; (hsa00603)Glycosphingolipid biosynthesis - globo and isoglobo series
		F2	2147	F2	PT|RPRGL2|THPH1	protein-coding	coagulation factor II, thrombin	This gene encodes the prothrombin protein (also known as coagulation factor II). This protein is proteolytically cleaved in multiple steps to form the activated serine protease thrombin. The activated thrombin enzyme plays an important role in thrombosis and hemostasis by converting fibrinogen to fibrin during blood clot formation, by stimulating platelet aggregation, and by activating additional…	chr11:46719213-46739506	GO:1900738 positive regulation of phospholipase C-activating G protein-coupled receptor signaling pathway;GO:1900736 regulation of phospholipase C-activating G protein-coupled receptor signaling pathway;GO:0070945 neutrophil mediated killing of gram-negative bacterium	[GO:0005575] cellular_component; [GO:0005576] extracellular region; [GO:0008150] biological_process; [GO:0003674] molecular_function; [GO:0008233] peptidase activity; [GO:0043167] ion binding; [GO:0006950] response to stress; [GO:0005615] extracellular space; [GO:0007165] signal transduction; [GO:0006464] cellular protein modification process; [GO:0002376] immune system process; [GO:0040011] loco…	GO:0005796 Golgi lumen;GO:0072562 blood microparticle;GO:0005788 endoplasmic reticulum lumen	GO:0070053 thrombospondin receptor activity;GO:0001530 lipopolysaccharide binding;GO:0008083 growth factor activity		Predicted intracellular proteins; FDA approved drug targets:Small molecule drugs; Peptidases:Serine-type peptidases; Disease related genes; FDA approved drug targets:Biotech drugs; ENZYME proteins:Hydrolases; Cancer-related genes:Candidate cancer biomarkers; Predicted secreted proteins; Enzymes; Candidate cardiovascular disease genes	[IPR000001] Kringle; [IPR000294] Gamma-carboxyglutamic acid-rich (GLA) domain; [IPR001254] Serine proteases, trypsin domain; [IPR001314] Peptidase S1A, chymotrypsin family; [IPR003966] Prothrombin/thrombin; [IPR009003] Peptidase S1, PA clan; [IPR013806] Kringle-like fold; [IPR018056] Kringle, conserved site; [IPR018114] Serine proteases, trypsin family, histidine active site; [IPR018992] Thrombin…		yes	yes			yes	principal1		MP:0005385 cardiovascular system phenotype; MP:0010768 mortality/aging; MP:0005376 homeostasis/metabolism phenotype; MP:0005384 cellular phenotype; MP:0005378 growth/size/body region phenotype; MP:0005386 behavior/neurological phenotype; MP:0005381 digestive/alimentary phenotype; MP:0005387 immune system phenotype; MP:0005389 reproductive system phenotype; MP:0003631 nervous system phenotype; MP:…	[ORPHA:329217] Cerebral sinovenous thrombosis; [ORPHA:325] Congenital factor II deficiency; [ORPHA:64738] NON RARE IN EUROPE: Non rare thrombophilia	OMIM ID:176930 Coagulation factor ii	Venous thrombosis; Prolonged prothrombin time; Coagulation factor deficiency syndrome; Hereditary factor II deficiency disease; Prothrombin deficiency, congenital; DYSPROTHROMBINEMIA PROTHROMBIN HIMI-II	alpha-Tocopherol	Cholesterol, HDL;Pulmonary Embolism;Stroke;Thrombosis;Venous Thromboembolism		Dysprothrombinemia prothrombin himi-ii: pathogenic; Hereditary factor ii deficiency disease: pathogenic; Ischemic stroke, susceptibility to: pathogenic,risk factor; Pregnancy loss, recurrent, susceptibility to, 2: pathogenic,risk factor; Prothrombin deficiency, congenital: pathogenic,risk factor; Prothrombin type 3: pathogenic; Thrombosis: pathogenic,risk factor; Venous thromboembolism: pathogeni…	HP:0040250:Reduced prothrombin antigen; HP:0030138:Excessive bleeding from superficial cuts; HP:0004419:Recurrent thrombophlebitis; HP:0030137:Prolonged bleeding following circumcision; HP:0011884:Abnormal umbilical stump bleeding; HP:0011891:Post-partum hemorrhage; HP:0012233:Intramuscular hematoma; HP:0012541:Cephalohematoma; HP:0200067:Recurrent spontaneous abortion; HP:0006298:Prolonged bleed…	Lepirudin; Bivalirudin; Drotrecogin alfa; Coagulation Factor IX (Recombinant); Menadione; Argatroban; Proflavine; Zinc; 2-{2-hydroxy-[1,1'-biphenyl]-3-yl}-1H-1,3-benzodiazole-5-carboximidamide; Beta-(2-Naphthyl)-Alanine; Hemi-Babim; 2-(2-hydroxy-phenyl)-3H-benzoimidazole-5-carboxamidine; 4-Oxo-2-Phenylmethanesulfonyl-Octahydro-Pyrrolo[1,2-a]Pyrazine-6-Carboxylic Acid [1-(N-Hydroxycarbamimidoyl)-P…	DYSPROTHROMBINEMIA PROTHROMBIN HIMI-II; Factor II deficiency; Homozygous Factor V Leiden mutation; Hypoprothrombinemias; Intrahepatic biloma; Mesenteric infarction; PREGNANCY LOSS, RECURRENT, SUSCEPTIBILITY TO, 2; Reduced prothrombin activity; prothrombin type 3 phenotype; Acute Mesenteric Arterial Embolus; Acute Mesenteric Arterial Thrombosis; Acute coagulopathy; Central Nervous System Vascular …	1239	1409	[{"UniProt":"P00734","EnsemblGene":["ENSG00000180210"],"EnsemblTrans":[["ENST00000311907","ENSP00000308541","principal1"]],"RefSeq":[["NM_000506","NP_000497","REVIEWED"],["NM_001311257","NP_001298186","SUPPRESSED"]],"UCSC":["uc001ndf.5"],"SwissProt":["THRB_HUMAN"]}]	liver	Distribution: Detected in single; Specificity: Tissue enriched	antibody: Weak to moderate cytoplasmic positivity was seen in most normal tissues. Distinct extracellular staining was observed in most tissues. Glandular cells of salivary gland and Purkinje cells displayed strong positivity. ; Positivity in plasma.	Antibody: Weak to moderate cytoplasmic positivity was seen in most malignant tissues. Malignant lymphomas were negative.	(M138)PID THROMBIN PAR4 PATHWAY; (M165)PID SYNDECAN 4 PATHWAY; (M238)PID THROMBIN PAR1 PATHWAY	(ko04610)Complement and coagulation cascades; (hsa04610)Complement and coagulation cascades; (hsa04611)Platelet activation			(M5946)HALLMARK COAGULATION; (M5902)HALLMARK APOPTOSIS; (M5921)HALLMARK COMPLEMENT	(M2842)BIOCARTA FIBRINOLYSIS PATHWAY; (M4470)BIOCARTA EXTRINSIC PATHWAY; (M6487)BIOCARTA PLATELETAPP PATHWAY
		Map6	4135	MAP6	MAP6-N|MTAP6|N-STOP|STOP	protein-coding	microtubule associated protein 6	This gene encodes a microtubule-associated protein. The encoded protein is a calmodulin-binding and calmodulin-regulated protein that is involved in microtubule stabilization. Two transcript variants encoding distinct isoforms have been identified for this gene. [provided by RefSeq, Jul 2008]	chr11:75669038-75586914	GO:0032418 lysosome localization;GO:0050772 positive regulation of axonogenesis;GO:0048813 dendrite morphogenesis	[GO:0005575] cellular_component; [GO:0005622] intracellular; [GO:0043226] organelle; [GO:0005856] cytoskeleton; [GO:0003674] molecular_function; [GO:0008092] cytoskeletal protein binding; [GO:0008150] biological_process; [GO:0007010] cytoskeleton organization; [GO:0005737] cytoplasm; [GO:0005794] Golgi apparatus; [GO:0031410] cytoplasmic vesicle; [GO:0006810] transport; [GO:0030705] cytoskeleton-…	GO:0005801 cis-Golgi network;GO:0005798 Golgi-associated vesicle;GO:0030658 transport vesicle membrane	GO:0005516 calmodulin binding;GO:0008017 microtubule binding;GO:0015631 tubulin binding		Predicted intracellular proteins	[IPR007882] Microtubule-associated protein 6	Plasma membrane (reliability'])								MP:0010768 mortality/aging; MP:0005386 behavior/neurological phenotype; MP:0003631 nervous system phenotype		OMIM ID:601783 Microtubule-associated protein 6		Personality;Proteins						Complicated intra-abdominal infection; Schizophrenia-like symptoms (uncommon); Depression, psychotic; Severe major depression with psychotic features; Deficiency of testosterone biosynthesis; Abdominal Infection; Snoring; Hyperkinesia, Generalized; Spinal stenosis of lumbar region; LAURIN-SANDROW SYNDROME; Tuberculous pleural effusion; Difficulty sleeping; Obstructive sleep apnea hypopnea syndrom…	7	22	[{"UniProt":"Q96JE9","EnsemblGene":["ENSG00000171533"],"SwissProt":["MAP6_HUMAN"]}]		Distribution: Detected in many; Specificity: Tissue enhanced	antibody: Selective cytoplasmic staining in CNS, peripheral nerves and glomeruli. Most other tissues and cells were negative.; Selective cytoplasmic expression in CNS, peripheral nerve and renal glomeruli.	Antibody: A few cases of gliomas displayed weak to moderate cytoplasmic immunoreactivity. Other cancer tissues were negative.					(M5947)HALLMARK IL2 STAT5 SIGNALING
		C1qtnf5	114902	C1QTNF5	CTRP5|MFRP	protein-coding	C1q and TNF related 5	This gene encodes a member of a family of proteins that function as components of basement membranes and may play a role in cell adhesion. Mutations in this gene have been associated with late-onset retinal degeneration. The protein may be encoded by either a bicistronic transcript including sequence from the upstream membrane frizzled-related protein gene (MFRP), or by a monocistronic transcript…	chr11:119346705-119338942	GO:0048839 inner ear development;GO:0043583 ear development;GO:0009306 protein secretion	[GO:0003674] molecular_function; [GO:0005575] cellular_component; [GO:0005576] extracellular region; [GO:0032991] protein-containing complex; [GO:0008150] biological_process; [GO:0006810] transport; [GO:0015031] protein transport; [GO:0048856] anatomical structure development; [GO:0005615] extracellular space; [GO:0005886] plasma membrane; [GO:0005737] cytoplasm; [GO:0005622] intracellular; [GO:0…	GO:0016328 lateral plasma membrane;GO:0005581 collagen trimer;GO:0005923 bicellular tight junction	GO:0042802 identical protein binding;GO:0005515 protein binding;GO:0005488 binding		Disease related genes; Predicted secreted proteins	[IPR001073] C1q domain; [IPR008160] Collagen triple helix repeat; [IPR008983] Tumour necrosis factor-like domain superfamily		yes	yes				principal1		MP:0005370 liver/biliary system phenotype; MP:0005385 cardiovascular system phenotype; MP:0005376 homeostasis/metabolism phenotype; MP:0005386 behavior/neurological phenotype; MP:0003631 nervous system phenotype; MP:0005391 vision/eye phenotype; MP:0005379 endocrine/exocrine gland phenotype; MP:0001186 pigmentation phenotype	[ORPHA:67042] Late-onset retinal degeneration	OMIM ID:608752 C1q- and tumor necrosis factor-related protein 5	Nanophthalmos 2; Microphthalmia, isolated 5; Retinal dystrophy; Late-onset retinal degeneration; Nanophthalmos		Longevity		Clinvar: phenotype not specified: likely pathogenic,pathogenic; Late-onset retinal degeneration: likely pathogenic; Microphthalmia, isolated 5: likely pathogenic,pathogenic; Nanophthalmos 2: pathogenic; Retinal dystrophy: likely pathogenic,pathogenic	HP:0031531:Sub-RPE deposits; HP:0007830:Adult-onset night blindness; HP:0000575:Scotoma; HP:0000546:Retinal degeneration; HP:0000488:Retinopathy; HP:0000572:Visual loss; HP:0000510:Rod-cone dystrophy; HP:0000618:Blindness; HP:0000006:Autosomal dominant inheritance		Sub-RPE deposits; Lens Diseases; Adult-onset night blindness; DOYNE HONEYCOMB RETINAL DYSTROPHY; Acute angle-closure glaucoma; FUNDUS DYSTROPHY, PSEUDOINFLAMMATORY, OF SORSBY; LATE-ONSET RETINAL DEGENERATION (disorder); Scotoma; X-linked retinitis pigmentosa; Macular degeneration; Glycogen Storage Disease; Vitelliform Macular Dystrophy; Autosomal recessive retinitis pigmentosa; Geographic Atrophy…	28	44	[{"UniProt":"Q9BXJ0","EnsemblGene":["ENSG00000223953"],"EnsemblTrans":[["ENST00000528368","ENSP00000431140","principal1"],["ENST00000530681","ENSP00000456533","principal1"]],"RefSeq":[["NM_001278431","NP_001265360","REVIEWED"],["NM_015645","NP_056460","REVIEWED"]],"UCSC":["uc058iiv.1"],"SwissProt":["C1QT5_HUMAN"]},{"UniProt":"A0A024R3F8","RefSeq":[["NM_001278431","NP_001265360","REVIEWED"],["NM_0…		Distribution: Detected in many; Specificity: Tissue enhanced	antibody: Most normal tissues showed weak nuclear positivity or were negative. Decidual cells, leydig cells, smooth muscle, endometrial and ovarian stromal cells showed moderate nuclear staining.; RNA-based expert annotation gave inconclusive results.	Antibody: Most cancer cells were weakly stained or negative. Several gliomas, endometrial and cases of squamous cell carcinomas displayed moderate cytoplasmic positivity. Cases of breast cancers and basal cell carcinomas showed distinct nuclear positivity.	(M5880)NABA ECM AFFILIATED; (M5885)NABA MATRISOME ASSOCIATED; (M5889)NABA MATRISOME
		Trib2	28951	TRIB2	C5FW|GS3955|TRB2	protein-coding	tribbles pseudokinase 2	This gene encodes one of three members of the Tribbles family. The Tribbles members share a Trb domain, which is homologous to protein serine-threonine kinases, but lacks the active site lysine and probably lacks a catalytic function. The Tribbles proteins interact and modulate the activity of signal transduction pathways in a number of physiological and pathological processes. This Tribbles memb…	chr2:12716872-12742734	GO:0032693 negative regulation of interleukin-10 production;GO:0045599 negative regulation of fat cell differentiation;GO:0032653 regulation of interleukin-10 production	[GO:0003674] molecular_function; [GO:0043167] ion binding; [GO:0008150] biological_process; [GO:0006464] cellular protein modification process; [GO:0016301] kinase activity; [GO:0030154] cell differentiation; [GO:0005575] cellular_component; [GO:0005737] cytoplasm; [GO:0005622] intracellular; [GO:0043226] organelle; [GO:0005856] cytoskeleton; [GO:0030234] enzyme regulator activity; [GO:0005634] n…	GO:0005856 cytoskeleton;GO:0043232 intracellular non-membrane-bounded organelle;GO:0043228 non-membrane-bounded organelle	GO:0031434 mitogen-activated protein kinase kinase binding;GO:0055106 ubiquitin-protein transferase regulator activity;GO:0004860 protein kinase inhibitor activity	CAMK Ser/Thr protein kinase family	Kinases:CAMK Ser/Thr protein kinases; Enzymes	[IPR000719] Protein kinase domain; [IPR011009] Protein kinase-like domain superfamily; [IPR024104] Pseudokinase tribbles family/serine-threonine-protein kinase 40	Cytosol;Nucleoplasm (reliability'])				yes		principal1		MP:0010768 mortality/aging; MP:0005378 growth/size/body region phenotype; MP:0005386 behavior/neurological phenotype; MP:0005387 immune system phenotype; MP:0005371 limbs/digits/tail phenotype; MP:0005397 hematopoietic system phenotype; MP:0005380 embryo phenotype		OMIM ID:609462 Tribbles pseudokinase 2		Child Development Disorders, Pervasive;Cholesterol;Folic Acid;Macrophage Inflammatory Proteins;Personality;Varicose Veins	Optic Disk;Paliperidone Palmitate;Schizophrenia					Autoimmune uveitis; Narcolepsy type 1; Cataplexy; Anemia, Macrocytic; Uveitis; Acute Erythroblastic Leukemia; Narcolepsy; Adult Myelodysplastic Syndrome; Childhood Myelodysplastic Syndrome; Myeloid Leukemia; Metastatic melanoma; Acute monocytic leukemia; Vascular Diseases; Hematologic Neoplasms; Precursor Cell Lymphoblastic Leukemia Lymphoma; Small cell carcinoma of lung; nervous system disorder;…	47	72	[{"UniProt":"Q92519","EnsemblGene":["ENSG00000071575"],"EnsemblTrans":[["ENST00000155926","ENSP00000155926","principal1"]],"RefSeq":[["NM_021643","NP_067675","REVIEWED"]],"UCSC":["uc002rbv.5"],"SwissProt":["TRIB2_HUMAN"]}]		Distribution: Detected in all; Specificity: Low tissue specificity	antibody: Strong immunoreactivity was observed in thyroid gland, spleen, brain and blood vessels. Remaining normal tissues were in general weakly stained.; Cytoplasmic expression in most tissues.	Antibody: Single cases of several tumor types displayed strong cytoplasmic staining, especially in stomach cancers and malignant lymphomas. Most cancer tissues were however weakly stained or negative.					(M5953)HALLMARK KRAS SIGNALING UP
		Palm2	445815	PALM2AKAP2	AKAP-2|AKAP-KL|AKAP2|AKAPKL|MISP2|PALM2|PALM2-AKAP2|PRKA2	protein-coding	PALM2 and AKAP2 fusion	This gene belongs to the paralemmin downstream gene (PDG) family defined in PMID:22855693. Paralemmin downstream genes may have evolved contiguously with the paralemmin genes and are associated with other paralemmin paralogs in humans and several other taxa. The gene encodes three distinct protein isoforms, the PALM2 isoform, the AKAP2 isoform and the PALM2-AKAP2 isoform. The biological significa…	chr9:109640787-110172512	GO:0008360 regulation of cell shape;GO:0022604 regulation of cell morphogenesis;GO:0000902 cell morphogenesis	[GO:0005575] cellular_component; [GO:0008150] biological_process; [GO:0048856] anatomical structure development; [GO:0000902] cell morphogenesis; [GO:0005886] plasma membrane	GO:0005886 plasma membrane;GO:0071944 cell periphery;GO:0016020 membrane			Predicted intracellular proteins	[IPR004965] Paralemmin; [IPR029304] A-kinase anchor protein 2, C-terminal domain	Plasma membrane (reliability']); Additional: Nuclear bodies;Nucleoplasm										OMIM ID:604582 A-kinase anchor protein 2		Albumins;Ankle Brachial Index;Atherosclerosis;Child Development Disorders, Pervasive;Hip;Lipoprotein(a);Platelet Function Tests;Triglycerides;Zeaxanthins;gamma-Tocopherol	Body Height;Body Mass Index;Bronchodilator Agents;Cerebrovascular Trauma;Cholesterol;Cognition;Diabetes Mellitus, Type 2;Lung Volume Measurements					HIV-associated neurocognitive disorder; Kallmann Syndrome; Androgen-Insensitivity Syndrome; Metastasis from malignant tumor of prostate; Metastatic Prostate Carcinoma; Mild cognitive disorder; Diastolic blood pressure; Waist-Hip Ratio; Adolescent idiopathic scoliosis; White Blood Cell Count procedure; Systolic Pressure; Cardiovascular Diseases; Body Height; ovarian neoplasm; Malignant neoplasm of…	11	65	[{"UniProt":"Q8IXS6","SwissProt":["PALM2_HUMAN"]},{"UniProt":"Q9Y2D5","SwissProt":["AKAP2_HUMAN"]}]		Distribution: Detected in many; Specificity: Tissue enhanced	antibody: Renal tubules, hepatocytes along with a subset of cells in cells in glomeruli and adrenal showed moderate positivity. Remaining normal tissues were weakly stained or negative.; Estimation of protein expression could not be performed. View primary data.	Antibody: A single case of hepatocellular carcinoma showed moderate cytoplasmic staining. A single case of melanoma displayed moderate membranous staining. Remaining cancer tissues were weakly stained or negative.
		Gamt	2593	GAMT	CCDS2|HEL-S-20|PIG2|TP53I2	protein-coding	guanidinoacetate N-methyltransferase	The protein encoded by this gene is a methyltransferase that converts guanidoacetate to creatine, using S-adenosylmethionine as the methyl donor. Defects in this gene have been implicated in neurologic syndromes and muscular hypotonia, probably due to creatine deficiency and accumulation of guanidinoacetate in the brain of affected individuals. Two transcript variants encoding different isoforms …	chr19:1401542-1397026	GO:0006601 creatine biosynthetic process;GO:0006600 creatine metabolic process;GO:0042398 cellular modified amino acid biosynthetic process	[GO:0003674] molecular_function; [GO:0008168] methyltransferase activity; [GO:0008150] biological_process; [GO:0005575] cellular_component; [GO:0005622] intracellular; [GO:0043226] organelle; [GO:0005634] nucleus; [GO:0005737] cytoplasm; [GO:0009058] biosynthetic process; [GO:0044281] small molecule metabolic process; [GO:0005829] cytosol; [GO:0000003] reproduction; [GO:0048856] anatomical struct…	GO:0005829 cytosol;GO:0005634 nucleus;GO:0044444 cytoplasmic part	GO:0030731 guanidinoacetate N-methyltransferase activity;GO:0008757 S-adenosylmethionine-dependent methyltransferase activity;GO:0008168 methyltransferase activity		Predicted intracellular proteins; FDA approved drug targets:Small molecule drugs; Disease related genes; Enzymes; ENZYME proteins:Transferases	[IPR016550] Guanidinoacetate N-methyltransferase; [IPR026480] Arginine N-methyltransferase 2-like domain; [IPR029063] S-adenosyl-L-methionine-dependent methyltransferase						yes			MP:0005367 renal/urinary system phenotype; MP:0010768 mortality/aging; MP:0005376 homeostasis/metabolism phenotype; MP:0005384 cellular phenotype; MP:0005378 growth/size/body region phenotype; MP:0005386 behavior/neurological phenotype; MP:0005389 reproductive system phenotype; MP:0005379 endocrine/exocrine gland phenotype; MP:0005375 adipose tissue phenotype	[ORPHA:382] GUANIDINOACETATE METHYLTRANSFERASE DEFICIENCY	OMIM ID:601240 Guanidinoacetate methyltransferase	Cerebral creatine deficiency syndrome; Deficiency of guanidinoacetate methyltransferase			[612736] GUANIDINOACETATE METHYLTRANSFERASE DEFICIENCY	Cerebral creatine deficiency syndrome: likely pathogenic,pathogenic,uncertain significance; Clinvar: phenotype not specified: likely pathogenic,pathogenic,uncertain significance; Deficiency of guanidinoacetate methyltransferase: likely pathogenic,pathogenic,uncertain significance; History of neurodevelopmental disorder: likely pathogenic,uncertain significance	HP:0025051:Reduced brain creatine level by MRS; HP:0002457:Abnormal head movements; HP:0007153:Progressive extrapyramidal movement disorder; HP:0002384:Focal impaired awareness seizure; HP:0002305:Athetosis; HP:0010819:Atonic seizures; HP:0100716:Self-injurious behavior; HP:0002123:Generalized myoclonic seizures; HP:0011344:Severe global developmental delay; HP:0008947:Infantile muscular hypotoni…	Creatine; Guanidine; S-adenosyl-L-homocysteine; Glycocyamine; Phosphocreatine	Guanidinoacetate methyltransferase deficiency; Reduced brain creatine level by MRS; Head movements abnormal; Progressive extrapyramidal movement disorder; Creatine deficiency, X-linked; Cysticercosis; Amino Acid Metabolism, Inherited Disorders; Amino Acid Metabolism, Inborn Errors; Athetosis; Complex partial seizure with impairment of consciousness; Speech Delay; Helminthiasis; Self-Injurious Beh…	17	37	[{"UniProt":"Q14353","EnsemblGene":["ENSG00000130005"],"SwissProt":["GAMT_HUMAN"]},{"UniProt":"V9HWB2","RefSeq":[["NM_000156","NP_000147","REVIEWED"]],"UCSC":["uc002lsj.5"],"SwissProt":["V9HWB2_HUMAN"]}]	liver	Distribution: Detected in all; Specificity: Tissue enhanced	antibody: Moderate to strong cytoplasmic and membranous staining was observed in exocrine pancreas, epididymis, renal tubules, placental trophoblasts, gall bladder, liver, small intestine and cells in seminiferous ducts. Remaining normal tissues were generally negative.; Cytoplasmic and membranous expression in several tissues.	Antibody: Rare cases of malignant carcinoid, renal, pancreatic and liver cancer displayed moderate cytoplasmic staining. Remaining cancer tissues were generally negative.		(M00047)Creatine pathway; (hsa)Creatine pathway; (ko00260)Glycine, serine and threonine metabolism			(M5915)HALLMARK APICAL JUNCTION; (M5956)HALLMARK KRAS SIGNALING DN
		Tigit	201633	TIGIT	VSIG9|VSTM3|WUCAM	protein-coding	T cell immunoreceptor with Ig and ITIM domains	This gene encodes a member of the PVR (poliovirus receptor) family of immunoglobin proteins. The product of this gene is expressed on several classes of T cells including follicular B helper T cells (TFH). The protein has been shown to bind PVR with high affinity; this binding is thought to assist interactions between TFH and dendritic cells to regulate T cell dependent B cell responses.[provided…	chr3:114291102-114329747	GO:0032695 negative regulation of interleukin-12 production;GO:0032733 positive regulation of interleukin-10 production;GO:0032655 regulation of interleukin-12 production	[GO:0003674] molecular_function; [GO:0005575] cellular_component; [GO:0008150] biological_process; [GO:0007155] cell adhesion; [GO:0002376] immune system process; [GO:0005886] plasma membrane	GO:0009986 cell surface;GO:0016021 integral component of membrane;GO:0031224 intrinsic component of membrane	GO:0005102 signaling receptor binding;GO:0042802 identical protein binding;GO:0005515 protein binding			[IPR003599] Immunoglobulin subtype; [IPR007110] Immunoglobulin-like domain; [IPR013106] Immunoglobulin V-set domain; [IPR013783] Immunoglobulin-like fold; [IPR036179] Immunoglobulin-like domain superfamily; [IPR042948] T-cell immunoglobulin and ITIM domain receptor				yes	yes			yes	MP:0005384 cellular phenotype; MP:0005387 immune system phenotype; MP:0005397 hematopoietic system phenotype		OMIM ID:612859 T-cell immunoreceptor with immunoglobulin and itim domains		Myocardial Infarction						Squamous non-small cell lung cancer; Echinococcus multilocularis infection; Lymphocytic infiltration; Marinesco-Sjogren syndrome; Lymphoma, Large-Cell, Follicular; Autoimmune thyroiditis; Sezary Syndrome; Gonorrhea; Acute GVH disease; Seminoma; Hashimoto Disease; Tumor Immunity; Anaplastic thyroid carcinoma; Adult Hodgkin Lymphoma; Childhood Hodgkin Lymphoma; Invasive Ductal Breast Carcinoma; Gra…	42	47	[{"UniProt":"Q495A1","EnsemblGene":["ENSG00000181847"],"SwissProt":["TIGIT_HUMAN"]}]		Distribution: Detected in many; Specificity: Group enriched				(hsa04514)Cell adhesion molecules; (ko04514)Cell adhesion molecules (CAMs)
		Col16a1	1307	COL16A1	447AA|FP1572	protein-coding	collagen type XVI alpha 1 chain	This gene encodes the alpha chain of type XVI collagen, a member of the FACIT collagen family (fibril-associated collagens with interrupted helices). Members of this collagen family are found in association with fibril-forming collagens such as type I and II, and serve to maintain the integrity of the extracellular matrix. High levels of type XVI collagen have been found in fibroblasts and kerati…	chr1:31704162-31652263	GO:0033622 integrin activation;GO:0051894 positive regulation of focal adhesion assembly;GO:1903393 positive regulation of adherens junction organization	[GO:0008150] biological_process; [GO:0007155] cell adhesion; [GO:0005575] cellular_component; [GO:0005576] extracellular region; [GO:0032991] protein-containing complex; [GO:0007165] signal transduction; [GO:0005615] extracellular space; [GO:0003674] molecular_function; [GO:0005198] structural molecule activity; [GO:0030198] extracellular matrix organization; [GO:0031012] extracellular matrix; [G…	GO:0005597 collagen type XVI trimer;GO:0005588 collagen type V trimer;GO:0005593 FACIT collagen trimer	GO:0030020 extracellular matrix structural constituent conferring tensile strength;GO:0005178 integrin binding;GO:0005201 extracellular matrix structural constituent		Predicted secreted proteins; Predicted intracellular proteins	[IPR001791] Laminin G domain; [IPR008160] Collagen triple helix repeat; [IPR013320] Concanavalin A-like lectin/glucanase domain superfamily	Cytosol;Golgi apparatus;Plasma membrane (reliability'])	yes	yes						MP:0005391 vision/eye phenotype		OMIM ID:120326 Collagen, type xvi, alpha-1			Body Mass Index					Intelligence; Body mass index; Body Height; Glioblastoma	11	26	[{"UniProt":"Q07092","EnsemblGene":["ENSG00000084636"],"SwissProt":["COGA1_HUMAN"]}]		Distribution: Detected in many; Specificity: Low tissue specificity			(M3005)NABA COLLAGENS; (M198)PID SYNDECAN 1 PATHWAY; (M160)PID AVB3 INTEGRIN PATHWAY				(M5915)HALLMARK APICAL JUNCTION; (M5930)HALLMARK EPITHELIAL MESENCHYMAL TRANSITION
		Sod3	6649	SOD3	EC-SOD	protein-coding	superoxide dismutase 3	This gene encodes a member of the superoxide dismutase (SOD) protein family. SODs are antioxidant enzymes that catalyze the conversion of superoxide radicals into hydrogen peroxide and oxygen, which may protect the brain, lungs, and other tissues from oxidative stress. Proteolytic processing of the encoded protein results in the formation of two distinct homotetramers that differ in their ability…	chr4:24795478-24800845	GO:0019430 removal of superoxide radicals;GO:0071450 cellular response to oxygen radical;GO:0071451 cellular response to superoxide	[GO:0003674] molecular_function; [GO:0043167] ion binding; [GO:0008150] biological_process; [GO:0016491] oxidoreductase activity; [GO:0006950] response to stress; [GO:0005575] cellular_component; [GO:0005576] extracellular region; [GO:0005615] extracellular space; [GO:0005622] intracellular; [GO:0043226] organelle; [GO:0005634] nucleus; [GO:0005737] cytoplasm; [GO:0031012] extracellular matrix; […	GO:0005796 Golgi lumen;GO:0062023 collagen-containing extracellular matrix;GO:0031012 extracellular matrix	GO:0004784 superoxide dismutase activity;GO:0016721 oxidoreductase activity, acting on superoxide radicals as acceptor;GO:0005507 copper ion binding		ENZYME proteins:Oxidoreductases; Predicted secreted proteins; Enzymes	[IPR001424] Superoxide dismutase, copper/zinc binding domain; [IPR018152] Superoxide dismutase, copper/zinc, binding site; [IPR024134] Superoxide dismutase (Cu/Zn) / superoxide dismutase copper chaperone; [IPR036423] Superoxide dismutase-like, copper/zinc binding domain superfamily		yes	yes			yes	principal1		MP:0005385 cardiovascular system phenotype; MP:0010768 mortality/aging; MP:0005369 muscle phenotype; MP:0005376 homeostasis/metabolism phenotype; MP:0005378 growth/size/body region phenotype; MP:0005387 immune system phenotype; MP:0005390 skeleton phenotype		OMIM ID:185490 Superoxide dismutase 3	Superoxide dismutase, elevated extracellular	Heart Failure;Platelet Function Tests	Depressive Disorder;Electrocardiography;Trypanosoma cruzi		Blood protein levels: pathogenic; Superoxide dismutase, elevated extracellular: pathogenic			SUPEROXIDE DISMUTASE, ELEVATED EXTRACELLULAR; Infant, Extremely Low Birth Weight; Mixed sensory-motor polyneuropathy; Hepatopulmonary Syndrome; Pneumoconiosis; Chronic Airflow Obstruction; Allergic Conjunctivitis; Diabetic Polyneuropathies; Dysautonomia, Familial; Necrosis; Leukomalacia, Periventricular; Contact hypersensitivity; Spinocerebellar Ataxia Type 2; Conjunctivitis; Alveolitis, Fibrosin…	158	199	[{"UniProt":"P08294","EnsemblGene":["ENSG00000109610"],"EnsemblTrans":[["ENST00000382120","ENSP00000371554","principal1"]],"RefSeq":[["NM_003102","NP_003093","REVIEWED"]],"UCSC":["uc003gqz.4"],"SwissProt":["SODE_HUMAN"]},{"UniProt":"A0A140VJU8","RefSeq":[["NM_003102","NP_003093","REVIEWED"]],"SwissProt":["A0A140VJU8_HUMAN"]}]	peripheral_nervous_system	Distribution: Detected in many; Specificity: Low tissue specificity	Cytoplasmic expression in several tissues with distinct positivity in plasma extracellular matrix.; antibody: Plasma showed distinct positivity in several tissues. Normal tissues showed weak to moderate cytoplasmic staining. A subset of cells in renal tubules and rectum displayed strong immunoreactivity. Squamous epithelium of esophagus exhibited strong cytoplasmic and membranous positivity. Resp…	Antibody: Follicular adenoma carcinoma of thyroid showed strong cytoplasmic staining. Occasional cases of cholangiocarcinoma, prostate, endometrial and pancreatic cancers exhibited moderate to strong positivity. Remaining cancer tissues were negative.					(M5909)HALLMARK MYOGENESIS	(M13158)BIOCARTA LONGEVITY PATHWAY
		Kcnh2	3757	KCNH2	ERG-1|ERG1|H-ERG|HERG|HERG1|Kv11.1|LQT2|SQT1	protein-coding	potassium voltage-gated channel subfamily H member 2	This gene encodes a voltage-activated potassium channel belonging to the eag family. It shares sequence similarity with the Drosophila ether-a-go-go (eag) gene. Mutations in this gene can cause long QT syndrome type 2 (LQT2). Transcript variants encoding distinct isoforms have been identified. [provided by RefSeq, Jul 2008]	chr7:150978321-150944956	GO:0003064 regulation of heart rate by hormone;GO:1902303 negative regulation of potassium ion export;GO:1903765 negative regulation of potassium ion export across plasma membrane	[GO:0005575] cellular_component; [GO:0008150] biological_process; [GO:0006810] transport; [GO:0055085] transmembrane transport; [GO:0003674] molecular_function; [GO:0022857] transmembrane transporter activity; [GO:0005737] cytoplasm; [GO:0005622] intracellular; [GO:0005886] plasma membrane; [GO:0003013] circulatory system process; [GO:0019899] enzyme binding; [GO:0032991] protein-containing compl…	GO:1902937 inward rectifier potassium channel complex;GO:0008076 voltage-gated potassium channel complex;GO:0034705 potassium channel complex	GO:0055131 C3HC4-type RING finger domain binding;GO:1902282 voltage-gated potassium channel activity involved in ventricular cardiac muscle cell action potential repolarization;GO:0086008 voltage-gated potassium channel activity involved in cardiac muscle cell action potential repolarization		FDA approved drug targets:Small molecule drugs; Disease related genes; Transporters:Transporter channels and pores; Voltage-gated ion channels:Voltage-Gated Potassium Channels	[IPR000595] Cyclic nucleotide-binding domain; [IPR003938] Potassium channel, voltage-dependent, EAG/ELK/ERG; [IPR003967] Potassium channel, voltage-dependent, ERG; [IPR005821] Ion transport domain; [IPR014710] RmlC-like jelly roll fold; [IPR018490] Cyclic nucleotide-binding-like; [IPR027359] Voltage-dependent channel domain superfamily; [IPR000014] PAS domain; [IPR000700] PAS-associated, C-termin…				yes	yes	yes		yes	MP:0005385 cardiovascular system phenotype; MP:0010768 mortality/aging; MP:0005369 muscle phenotype; MP:0005376 homeostasis/metabolism phenotype; MP:0005378 growth/size/body region phenotype; MP:0005380 embryo phenotype; MP:0005382 craniofacial phenotype	[ORPHA:51083] Familial short QT syndrome; [ORPHA:101016] Romano-Ward syndrome	OMIM ID:152427 Potassium channel, voltage-gated, subfamily h, member 2	Long QT syndrome; Long QT syndrome 2; Cardiac arrhythmia; Arrhythmia; not specified; Congenital long QT syndrome; Cardiovascular phenotype; Inborn genetic diseases; Long QT syndrome 1/2, digenic; Short QT syndrome 1; Acquired long QT syndrome; Romano-Ward syndrome; Ventricular tachycardia; Long QT syndrome 1; Long QT syndrome 2/5; short QT syndrome; Long QT syndrome, bradycardia-induced; Prolonge…	Waist-Hip Ratio	Electrocardiography		Brugada syndrome: likely pathogenic,not provided,risk factor; Cardiac arrhythmia: likely pathogenic,pathogenic,uncertain significance; Cardiovascular phenotype: likely pathogenic,not provided,pathogenic,uncertain significance; Clinvar: phenotype not specified: likely pathogenic,not provided,pathogenic,uncertain significance; Congenital long qt syndrome: likely pathogenic,not provided,pathogenic,r…	HP:0012232:Shortened QT interval; HP:0500018:Abnormal cardiac exercise stress test; HP:0001664:Torsade de pointes; HP:0001688:Sinus bradycardia; HP:0005135:Abnormal T-wave; HP:0001197:Abnormality of prenatal development or birth; HP:0005184:Prolonged QTc interval; HP:0001678:Atrioventricular block; HP:0001657:Prolonged QT interval; HP:0001695:Cardiac arrest; HP:0001662:Bradycardia; HP:0001663:Ven…	Fluvoxamine; Erythromycin; Dofetilide; Phenytoin; Amsacrine; Disopyramide; Ibutilide; Amitriptyline; Terfenadine; Alfuzosin; Loratadine; Prazosin; Imipramine; Fluoxetine; Chlorpromazine; Sotalol; Ciprofloxacin; Hydroxyzine; Doxazosin; Cisapride; Astemizole; Verapamil; Tamoxifen; Thioridazine; Quinidine; Ketoconazole; Procainamide; Perhexiline; Pimozide; Amiodarone; Carvedilol; Doxepin; Nefazodone…	LONG QT SYNDROME 2, ACQUIRED, SUSCEPTIBILITY TO; LONG QT SYNDROME, BRADYCARDIA-INDUCED; LONG QT SYNDROME 1/2, DIGENIC (disorder); LONG QT SYNDROME 2/3, DIGENIC; LONG QT SYNDROME 2/9, DIGENIC; Long QT syndrome type 3; Catecholaminergic Polymorphic Ventricular Tachycardia Type 1; SHORT QT SYNDROME 2 (disorder); Short QT Syndrome 3; Cardiac channelopathy; Premature Cardiac Complex; Short QT Syndrome…	533	604	[{"UniProt":"Q12809","EnsemblGene":["ENSG00000055118"],"SwissProt":["KCNH2_HUMAN"]},{"UniProt":"A0A090N7W1","RefSeq":[["NM_172056","NP_742053","REVIEWED"]],"SwissProt":["A0A090N7W1_HUMAN"]},{"UniProt":"A0A090N7X5","RefSeq":[["NM_172057","NP_742054","REVIEWED"]],"SwissProt":["A0A090N7X5_HUMAN"]},{"UniProt":"A0A090N8Q0","RefSeq":[["NM_000238","NP_000229","REVIEWED"]],"SwissProt":["A0A090N8Q0_HUMAN"…		Distribution: Detected in many; Specificity: Tissue enhanced							(M5941)HALLMARK UV RESPONSE UP; (M5909)HALLMARK MYOGENESIS; (M5915)HALLMARK APICAL JUNCTION
		Chst3	9469	CHST3	C6ST|C6ST1|HSD	protein-coding	carbohydrate sulfotransferase 3	This gene encodes an enzyme which catalyzes the sulfation of chondroitin, a proteoglycan found in the extracellular matrix and most cells which is involved in cell migration and differentiation. Mutations in this gene are associated with spondylepiphyseal dysplasia and humerospinal dysostosis. [provided by RefSeq, Mar 2009]	chr10:71964395-72013562	GO:0006044 N-acetylglucosamine metabolic process;GO:0030206 chondroitin sulfate biosynthetic process;GO:1901071 glucosamine-containing compound metabolic process	[GO:0008150] biological_process; [GO:0005975] carbohydrate metabolic process; [GO:0003674] molecular_function; [GO:0005575] cellular_component; [GO:0005737] cytoplasm; [GO:0005622] intracellular; [GO:0043226] organelle; [GO:0005794] Golgi apparatus; [GO:0006790] sulfur compound metabolic process; [GO:0009058] biosynthetic process; [GO:0044281] small molecule metabolic process	GO:0005802 trans-Golgi network;GO:0000139 Golgi membrane;GO:0098791 Golgi subcompartment	GO:0008459 chondroitin 6-sulfotransferase activity;GO:0034481 chondroitin sulfotransferase activity;GO:0001517 N-acetylglucosamine 6-O-sulfotransferase activity		Potential drug targets; Disease related genes; ENZYME proteins:Transferases; Enzymes	[IPR000863] Sulfotransferase domain; [IPR016469] Carbohydrate sulfotransferase; [IPR027417] P-loop containing nucleoside triphosphate hydrolase	Cytosol;Golgi apparatus (reliability'])			yes	yes		principal1	yes	MP:0005384 cellular phenotype; MP:0005386 behavior/neurological phenotype; MP:0005387 immune system phenotype; MP:0005389 reproductive system phenotype; MP:0003631 nervous system phenotype; MP:0005390 skeleton phenotype; MP:0005397 hematopoietic system phenotype; MP:0005379 endocrine/exocrine gland phenotype	[ORPHA:263463] CHST3-related skeletal dysplasia	OMIM ID:603799 Carbohydrate sulfotransferase 3	Spondyloepiphyseal dysplasia with congenital joint dislocations	Child Development Disorders, Pervasive;Insulin;Myocardial Infarction;Pancreatic Neoplasms;Waist Circumference	Emotions;Intervertebral disc disease;S-(3-hydroxypropyl)cysteine N-acetate;Smoking	[143095] SPONDYLOEPIPHYSEAL DYSPLASIA WITH CONGENITAL JOINT DISLOCATIONS	Clinvar: phenotype not specified: likely pathogenic,pathogenic; Spondyloepiphyseal dysplasia with congenital joint dislocations: likely pathogenic,pathogenic	HP:0006462:Generalized bone demineralization; HP:0006471:Fixed elbow flexion; HP:0005021:Bilateral elbow dislocations; HP:0006067:Multiple carpal ossification centers; HP:0006099:Metacarpophalangeal joint hyperextensibility; HP:0009179:Deviation of the 5th finger; HP:0002945:Intervertebral space narrowing; HP:0008593:Prominent antitragus; HP:0009880:Broad distal phalanges of all fingers; HP:00012…		3-Beta-hydroxy-delta-5-C27-steroid dehydrogenase deficiency; Fixed elbow flexion; Larsen syndrome, recessive type; Skeleton dysplasia; Bilateral elbow dislocations; Congenital dislocation; Deviation of the 5th finger; Generalized bone demineralization; Multiple carpal ossification centers; Broad distal phalanges of all fingers; MULTIPLE JOINT DISLOCATIONS, SHORT STATURE, AND CRANIOFACIAL DYSMORPH…	13	32	[{"UniProt":"Q7LGC8","EnsemblGene":["ENSG00000122863"],"EnsemblTrans":[["ENST00000373115","ENSP00000362207","principal1"]],"RefSeq":[["NM_004273","NP_004264","REVIEWED"],["XM_006718075","XP_006718138","MODEL"],["XM_011540369","XP_011538671","MODEL"]],"UCSC":["uc001jsn.4"],"SwissProt":["CHST3_HUMAN"]}]	liver	Distribution: Detected in many; Specificity: Low tissue specificity	Cytoplasmic expression in several tissues.			(ko00532)Glycosaminoglycan biosynthesis - chondroitin sulfate / dermatan sulfate; (hsa00532)Glycosaminoglycan biosynthesis - chondroitin sulfate / dermatan sulfate; (hsanan02)glycosaminoglycan biosynthesis			(M5891)HALLMARK HYPOXIA
		Dagla	747	DAGLA	C11orf11|DAGLALPHA|NSDDR	protein-coding	diacylglycerol lipase alpha	This gene encodes a diacylglycerol lipase. The encoded enzyme is involved in the biosynthesis of the endocannabinoid 2-arachidonoyl-glycerol.[provided by RefSeq, Nov 2010]	chr11:61680184-61747002	GO:0046340 diacylglycerol catabolic process;GO:0098920 retrograde trans-synaptic signaling by lipid;GO:0098921 retrograde trans-synaptic signaling by endocannabinoid	[GO:0008150] biological_process; [GO:0006629] lipid metabolic process; [GO:0005575] cellular_component; [GO:0003674] molecular_function; [GO:0043167] ion binding; [GO:0005886] plasma membrane; [GO:0005737] cytoplasm; [GO:0005622] intracellular; [GO:0043226] organelle; [GO:0031410] cytoplasmic vesicle; [GO:0005768] endosome; [GO:0009056] catabolic process; [GO:0007165] signal transduction; [GO:004…	GO:0043196 varicosity;GO:0032591 dendritic spine membrane;GO:0032590 dendrite membrane	GO:0016787 hydrolase activity;GO:0046872 metal ion binding;GO:0043169 cation binding		Disease related genes	[IPR002921] Fungal lipase-like domain; [IPR029058] Alpha/Beta hydrolase fold				yes	yes		principal1	yes	MP:0005370 liver/biliary system phenotype; MP:0005385 cardiovascular system phenotype; MP:0005376 homeostasis/metabolism phenotype; MP:0005384 cellular phenotype; MP:0005378 growth/size/body region phenotype; MP:0005386 behavior/neurological phenotype; MP:0005381 digestive/alimentary phenotype; MP:0005387 immune system phenotype; MP:0003631 nervous system phenotype; MP:0005390 skeleton phenotype;…		OMIM ID:614015 Diacylglycerol lipase, alpha			Cytokines;Linoleic Acid;S-(3-hydroxypropyl)cysteine N-acetate;Smoking;Vaccine Potency;alpha-Linolenic Acid;docosapentaenoic acid;gamma-Linolenic Acid					Phospholipid measurement; Renal carnitine transport defect; Cytokine Measurement; Smoking Behaviors; Inflammatory pain; Smoking; Vital capacity; Serum albumin measurement; Neurodevelopmental Disorders; Alcoholic Intoxication, Chronic; Lip and Oral Cavity Carcinoma; Malignant neoplasm of mouth; Memory impairment; Autistic Disorder; Major Depressive Disorder; Pain; Seizures; Schizophrenia; Carcinog…	7	24	[{"UniProt":"Q9Y4D2","EnsemblGene":["ENSG00000134780"],"EnsemblTrans":[["ENST00000257215","ENSP00000257215","principal1"]],"RefSeq":[["NM_006133","NP_006124","REVIEWED"]],"UCSC":["uc001nsa.4"],"SwissProt":["DGLA_HUMAN"]}]	pancreas	Distribution: Detected in many; Specificity: Tissue enhanced	Cytoplasmic expression in several tissues, most abundant in CNS.; antibody: Moderate cytoplasmic and/or nuclear positivity was displayed in renal tubules, adrenal gland, Purkinje cells, neuronal cells of hippocampus, epididymis and Leydig cells. Remaining normal tissues were weakly stained or negative.	Antibody: Several liver cancers along with few melanomas, skin, lung, urothelial, renal and testicular cancers showed weak to moderate cytoplasmic and/or nucleolar immunoreactivity. Remaining cancer tissues were generally negative.	(M266)PID NCADHERIN PATHWAY	(ko04925)Aldosterone synthesis and secretion; (hsa04925)aldosterone synthesis and secretion; (ko04723)Retrograde endocannabinoid signaling
		Fkbp11	51303	FKBP11	FKBP19	protein-coding	FKBP prolyl isomerase 11	FKBP11 belongs to the FKBP family of peptidyl-prolyl cis/trans isomerases, which catalyze the folding of proline-containing polypeptides. The peptidyl-prolyl isomerase activity of FKBP proteins is inhibited by the immunosuppressant compounds FK506 and rapamycin (Rulten et al., 2006 [PubMed 16596453]).[supplied by OMIM, Mar 2008]	chr12:48925492-48921963	GO:0000413 protein peptidyl-prolyl isomerization;GO:0018208 peptidyl-proline modification;GO:0018193 peptidyl-amino acid modification	[GO:0003674] molecular_function; [GO:0016853] isomerase activity; [GO:0008150] biological_process; [GO:0006464] cellular protein modification process; [GO:0005575] cellular_component	GO:0016021 integral component of membrane;GO:0031224 intrinsic component of membrane;GO:0044425 membrane part	GO:0003755 peptidyl-prolyl cis-trans isomerase activity;GO:0016859 cis-trans isomerase activity;GO:0016853 isomerase activity		Enzymes; Predicted intracellular proteins; ENZYME proteins:Isomerase	[IPR001179] FKBP-type peptidyl-prolyl cis-trans isomerase domain	Centrosome (reliability'])			yes	yes			yes	MP:0005387 immune system phenotype; MP:0005390 skeleton phenotype; MP:0005397 hematopoietic system phenotype		OMIM ID:610571 Fk506-binding protein 11								acute aortic dissection; Viral hepatitis; AMYOTROPHIC LATERAL SCLEROSIS 1; Hemangioma; Hepatitis A; Crohn Disease; Adenocarcinoma of lung (disorder); Liver carcinoma; Neoplasms	2	14	[{"UniProt":"E9PAR0","EnsemblGene":["ENSG00000134285"],"EnsemblTrans":[["ENST00000444214","ENSP00000412403",""]],"RefSeq":[["NM_001143781","NP_001137253","VALIDATED"]],"UCSC":["uc010sma.3"],"SwissProt":["E9PAR0_HUMAN"]},{"UniProt":"Q9NYL4","EnsemblGene":["ENSG00000134285"],"RefSeq":[["NM_001143781","NP_001137253","VALIDATED"]],"SwissProt":["FKB11_HUMAN"]}]		Distribution: Detected in many; Specificity: Tissue enhanced	Cytoplasmic expression in pancreas, lymphoid organs and immune cells in most tissues.; antibody: Pancreas, stomach, salivary gland, seminal vesicle, paneth cells in small intestine and subsets of lymphoid and hematopoietic cells displayed strong cytoplasmic positivity. Remaining normal tissues were generally negative.	Antibody: Several cancer melanoma, liver, testicular and pancreatic cancers along with rare cases of a few other cancers displayed moderate to strong cytoplasmic positivity. Remaining cancer cells were generally negative.
		Man2a2	4122	MAN2A2	MANA2X	protein-coding	mannosidase alpha class 2A member 2		chr15:90902377-90922585	GO:0006013 mannose metabolic process;GO:0006491 N-glycan processing;GO:0006517 protein deglycosylation	[GO:0005575] cellular_component; [GO:0003674] molecular_function; [GO:0043167] ion binding; [GO:0008150] biological_process; [GO:0005975] carbohydrate metabolic process; [GO:0016798] hydrolase activity, acting on glycosyl bonds; [GO:0044281] small molecule metabolic process; [GO:0005737] cytoplasm; [GO:0005622] intracellular; [GO:0043226] organelle; [GO:0005794] Golgi apparatus; [GO:0006464] cell…	GO:0000139 Golgi membrane;GO:0098791 Golgi subcompartment;GO:0044431 Golgi apparatus part	GO:0004572 mannosyl-oligosaccharide 1,3-1,6-alpha-mannosidase activity;GO:0015924 mannosyl-oligosaccharide mannosidase activity;GO:0004559 alpha-mannosidase activity		ENZYME proteins:Hydrolases; Predicted intracellular proteins; Enzymes	[IPR000602] Glycoside hydrolase family 38, N-terminal domain; [IPR011013] Galactose mutarotase-like domain superfamily; [IPR011330] Glycoside hydrolase/deacetylase, beta/alpha-barrel; [IPR011682] Glycosyl hydrolase family 38, C-terminal; [IPR013780] Glycosyl hydrolase, all-beta; [IPR015341] Glycoside hydrolase family 38, central domain; [IPR027291] Glycoside hydrolase 38, N-terminal domain superf…	Cytoplasmic bodies (reliability'])			yes	yes	yes		yes	MP:0005384 cellular phenotype; MP:0005389 reproductive system phenotype; MP:0005379 endocrine/exocrine gland phenotype		OMIM ID:600988 Mannosidase, alpha, class 2a, member 2			Attention Deficit Disorder with Hyperactivity					Attention deficit hyperactivity disorder		31	[{"UniProt":"P49641","EnsemblGene":["ENSG00000196547"],"SwissProt":["MA2A2_HUMAN"]}]		Distribution: Detected in all; Specificity: Low tissue specificity				(hsa)N-glycan biosynthesis, complex type; (M00075)N-glycan biosynthesis, complex type; (ko00510)N-Glycan biosynthesis				(M22009)BIOCARTA AMAN PATHWAY; (M22013)BIOCARTA ERAD PATHWAY
		Alpk3	57538	ALPK3	CMH27|MAK|MIDORI	protein-coding	alpha kinase 3		chr15:84817356-84873479	GO:0055013 cardiac muscle cell development;GO:0055006 cardiac cell development;GO:0055007 cardiac muscle cell differentiation	[GO:0003674] molecular_function; [GO:0043167] ion binding; [GO:0008150] biological_process; [GO:0006464] cellular protein modification process; [GO:0016301] kinase activity; [GO:0005575] cellular_component; [GO:0005622] intracellular; [GO:0043226] organelle; [GO:0005634] nucleus; [GO:0048856] anatomical structure development; [GO:0030154] cell differentiation	GO:0005634 nucleus;GO:0043231 intracellular membrane-bounded organelle;GO:0043227 membrane-bounded organelle	GO:0004674 protein serine/threonine kinase activity;GO:0004672 protein kinase activity;GO:0016773 phosphotransferase activity, alcohol group as acceptor	Atypical: Alpha-type protein kinase family	Kinases:Atypical kinases; Predicted intracellular proteins; Disease related genes; Enzymes; Potential drug targets	[IPR003598] Immunoglobulin subtype 2; [IPR003599] Immunoglobulin subtype; [IPR004166] MHCK/EF2 kinase; [IPR011009] Protein kinase-like domain superfamily; [IPR013098] Immunoglobulin I-set; [IPR013783] Immunoglobulin-like fold; [IPR036179] Immunoglobulin-like domain superfamily	Nucleoplasm (reliability'])						principal1		MP:0005385 cardiovascular system phenotype; MP:0010768 mortality/aging; MP:0005369 muscle phenotype; MP:0005378 growth/size/body region phenotype		OMIM ID:617608 Alpha kinase 3	Hypertrophic cardiomyopathy; CARDIOMYOPATHY, FAMILIAL HYPERTROPHIC 27; Cardiomyopathy	Autistic Disorder;Iron;Platelet Function Tests	3-hydroxy-1-methylpropylmercapturic acid;Antineoplastic Agents;Smoking;gemcitabine		Cardiomyopathy, familial hypertrophic 27: pathogenic,uncertain significance; Cardiomyopathy: likely pathogenic; Clinvar: phenotype not specified: likely pathogenic,pathogenic,uncertain significance; Primary familial hypertrophic cardiomyopathy: likely pathogenic	HP:0005180:Tricuspid regurgitation; HP:0001657:Prolonged QT interval; HP:0001789:Hydrops fetalis; HP:0001640:Cardiomegaly; HP:0001653:Mitral regurgitation; HP:0000007:Autosomal recessive inheritance		CARDIOMYOPATHY, FAMILIAL HYPERTROPHIC 27; Wolcott-Rallison syndrome; Prolonged QT interval; Tricuspid Valve Insufficiency; Large cell carcinoma of lung; Hypoxia-Ischemia, Brain; Hydrops Fetalis; Mitral Valve Insufficiency; Smoking Behaviors; Cardiomegaly; Smoking; Metastatic melanoma; Cardiomyopathy, Dilated; Hypertrophic Cardiomyopathy; Cardiomyopathies; Cerebrovascular accident	5	16	[{"UniProt":"Q96L96","EnsemblGene":["ENSG00000136383"],"EnsemblTrans":[["ENST00000258888","ENSP00000258888","principal1"]],"RefSeq":[["NM_020778","NP_065829","VALIDATED"]],"UCSC":["uc002ble.3"],"SwissProt":["ALPK3_HUMAN"]}]		Distribution: Detected in many; Specificity: Tissue enhanced	antibody: Strong nuclear positivity was observed in normal tissues.; Nuclear expression in several tissues, most abundant in heart and skeletal muscle.	Antibody: Strong nuclear positivity was observed in cancer tissues. Several cases of lymphomas, cervical and ovarian cancers were moderately stained.
		Esrrb	2103	ESRRB	DFNB35|ERR2|ERRb|ERRbeta2|ESRL2|NR3B2	protein-coding	estrogen related receptor beta	This gene encodes a protein with similarity to the estrogen receptor. Its function is unknown; however, a similar protein in mouse plays an essential role in placental development. [provided by RefSeq, Jul 2008]	chr14:76371271-76501839	GO:0090282 positive regulation of transcription involved in G2/M transition of mitotic cell cycle;GO:0000117 regulation of transcription involved in G2/M transition of mitotic cell cycle;GO:0071931 positive regulation of transcription involved in G1/S transition of mitotic cell cycle	[GO:0003674] molecular_function; [GO:0003677] DNA binding; [GO:0007165] signal transduction; [GO:0008150] biological_process; [GO:0043167] ion binding; [GO:0034641] cellular nitrogen compound metabolic process; [GO:0009058] biosynthetic process; [GO:0005575] cellular_component; [GO:0005622] intracellular; [GO:0043226] organelle; [GO:0005634] nucleus; [GO:0008289] lipid binding; [GO:0003700] DNA-b…	GO:0032039 integrator complex;GO:0000793 condensed chromosome;GO:0000790 nuclear chromatin	GO:0003707 steroid hormone receptor activity;GO:0004879 nuclear receptor activity;GO:0098531 transcription factor activity, direct ligand regulated sequence-specific DNA binding		Disease related genes; Transcription factors:Zinc-coordinating DNA-binding domains; Predicted intracellular proteins; Nuclear receptors	[IPR000536] Nuclear hormone receptor, ligand-binding domain; [IPR001628] Zinc finger, nuclear hormone receptor-type; [IPR001723] Nuclear hormone receptor; [IPR013088] Zinc finger, NHR/GATA-type; [IPR024178] Oestrogen receptor/oestrogen-related receptor; [IPR027289] Oestrogen-related receptor; [IPR035500] Nuclear hormone receptor-like domain superfamily									MP:0005385 cardiovascular system phenotype; MP:0010768 mortality/aging; MP:0005369 muscle phenotype; MP:0005378 growth/size/body region phenotype; MP:0005386 behavior/neurological phenotype; MP:0005377 hearing/vestibular/ear phenotype; MP:0005380 embryo phenotype	[ORPHA:90636] Autosomal recessive non-syndromic sensorineural deafness type DFNB	OMIM ID:602167 Estrogen-related receptor, beta	Rare genetic deafness; Deafness, autosomal recessive 35	Adiponectin;Ankle Brachial Index;Blood Pressure;Hematocrit;Platelet Function Tests	Attention Deficit Disorder with Hyperactivity;Precursor Cell Lymphoblastic Leukemia-Lymphoma;Respiratory Function Tests		Deafness, autosomal recessive 35: pathogenic; Nonsyndromic hearing loss and deafness: likely pathogenic	HP:0000407:Sensorineural hearing impairment; HP:0000007:Autosomal recessive inheritance	Diethylstilbestrol; Genistein; Flavone	DEAFNESS, AUTOSOMAL RECESSIVE 35; Mixed carcinoma; Adult Extraskeletal Myxoid Chondrosarcoma; Dental fluorosis; Congenital hypoplasia of adrenal gland; Extraskeletal Myxoid Chondrosarcoma; Rotator cuff syndrome; X-linked Adrenal Hypoplasia; Dental Fluorosis, Acquired; Nodular Sclerosis Classical Hodgkin Lymphoma; Incontinentia Pigmenti Achromians; Arrhythmogenic Right Ventricular Dysplasia; Tempo…	31	56	[{"UniProt":"O95718","EnsemblGene":["ENSG00000119715"],"RefSeq":[["XM_017021086","XP_016876575"]],"SwissProt":["ERR2_HUMAN"]}]	eye	Distribution: Detected in some; Specificity: Tissue enhanced				(ko04550)Signaling pathways regulating pluripotency of stem cells; (hsa04550)Signaling pathways regulating pluripotency of stem cells
		Gstt1	2952	GSTT1		protein-coding	glutathione S-transferase theta 1	The protein encoded by this gene, glutathione S-transferase (GST) theta 1 (GSTT1), is a member of a superfamily of proteins that catalyze the conjugation of reduced glutathione to a variety of electrophilic and hydrophobic compounds. Human GSTs can be divided into five main classes: alpha, mu, pi, theta, and zeta. The theta class includes GSTT1, GSTT2, and GSTT2B. GSTT1 and GSTT2/GSTT2B share 55%…		GO:1901685 glutathione derivative metabolic process;GO:1901687 glutathione derivative biosynthetic process;GO:0006749 glutathione metabolic process	[GO:0003674] molecular_function; [GO:0005575] cellular_component; [GO:0005737] cytoplasm; [GO:0005622] intracellular; [GO:0005829] cytosol; [GO:0008150] biological_process; [GO:0016765] transferase activity, transferring alkyl or aryl (other than methyl) groups; [GO:0034641] cellular nitrogen compound metabolic process; [GO:0051186] cofactor metabolic process; [GO:0006790] sulfur compound metabol…	GO:0070062 extracellular exosome;GO:1903561 extracellular vesicle;GO:0043230 extracellular organelle	GO:0004602 glutathione peroxidase activity;GO:0004364 glutathione transferase activity;GO:0004601 peroxidase activity			[IPR004045] Glutathione S-transferase, N-terminal; [IPR004046] Glutathione S-transferase, C-terminal; [IPR010987] Glutathione S-transferase, C-terminal-like; [IPR036249] Thioredoxin-like superfamily; [IPR036282] Glutathione S-transferase, C-terminal domain superfamily; [IPR040075] Glutathione S-transferase Theta, N-terminal; [IPR040077] Glutathione S-transferase Theta, C-terminal; [IPR040079] Glu…									MP:0005376 homeostasis/metabolism phenotype		OMIM ID:600436 Glutathione s-transferase, theta-1							Glutathione	hepatitis immune; newly diagnosed non-small cell lung cancer; Uterine Corpus Cancer; Distal colitis; Environment-Related Malignant Neoplasm; Non-arteritic ischemic optic neuropathy; Juvenile open angle; Raynaud Disease; Low Grade Cervical Squamous Intraepithelial Neoplasia; Neoplasms, Multiple Primary; Age-related cortical cataract; Anemia in children; ADRENOCORTICAL CARCINOMA, HEREDITARY; Compli…	1777	1812	[{"UniProt":"A0A0G2JRN4","EnsemblGene":["ENSG00000277656"],"EnsemblTrans":[["ENST00000628470","ENSP00000486937",""]],"RefSeq":[["NM_001293813","NP_001280742","REVIEWED"]],"SwissProt":["A0A0G2JRN4_HUMAN"]},{"UniProt":"A0A0G2JRQ5","EnsemblGene":["ENSG00000277656"],"EnsemblTrans":[["ENST00000628969","ENSP00000486973",""]],"RefSeq":[["NM_001293807","NP_001280736","REVIEWED"]],"SwissProt":["A0A0G2JRQ5…						(ko00480)Glutathione metabolism; (hsa00480)Glutathione metabolism; (hsa00982)Drug metabolism - cytochrome P450
		Limk1	3984	LIMK1	LIMK|LIMK-1	protein-coding	LIM domain kinase 1	There are approximately 40 known eukaryotic LIM proteins, so named for the LIM domains they contain. LIM domains are highly conserved cysteine-rich structures containing 2 zinc fingers. Although zinc fingers usually function by binding to DNA or RNA, the LIM motif probably mediates protein-protein interactions. LIM kinase-1 and LIM kinase-2 belong to a small subfamily with a unique combination of…	chr7:74083804-74122525	GO:0051444 negative regulation of ubiquitin-protein transferase activity;GO:0045773 positive regulation of axon extension;GO:0051496 positive regulation of stress fiber assembly	[GO:0003674] molecular_function; [GO:0043167] ion binding; [GO:0008150] biological_process; [GO:0006464] cellular protein modification process; [GO:0016301] kinase activity; [GO:0005575] cellular_component; [GO:0005737] cytoplasm; [GO:0005622] intracellular; [GO:0043226] organelle; [GO:0005634] nucleus; [GO:0005654] nucleoplasm; [GO:0005829] cytosol; [GO:0005856] cytoskeleton; [GO:0007165] signal…	GO:0030027 lamellipodium;GO:0016607 nuclear speck;GO:0005925 focal adhesion	GO:0031072 heat shock protein binding;GO:0004674 protein serine/threonine kinase activity;GO:0004672 protein kinase activity	TKL Ser/Thr protein kinase family	Predicted intracellular proteins; Disease related genes; Cancer-related genes:Candidate cancer biomarkers; Enzymes; Kinases:TKL Ser/Thr protein kinases; Potential drug targets; ENZYME proteins:Transferases	[IPR000719] Protein kinase domain; [IPR001245] Serine-threonine/tyrosine-protein kinase, catalytic domain; [IPR001478] PDZ domain; [IPR001781] Zinc finger, LIM-type; [IPR011009] Protein kinase-like domain superfamily; [IPR017441] Protein kinase, ATP binding site; [IPR036034] PDZ superfamily	Cytosol;Nuclear speckles (reliability'])					yes			MP:0005384 cellular phenotype; MP:0005386 behavior/neurological phenotype; MP:0003631 nervous system phenotype	[ORPHA:904] Williams syndrome	OMIM ID:601329 Lim domain kinase 1						HP:0007372:Atrophy/Degeneration involving the corticospinal tracts; HP:0001361:Nystagmus-induced head nodding; HP:0000025:Functional abnormality of male internal genitalia; HP:0100025:Overfriendliness; HP:0010662:Abnormality of the diencephalon; HP:0007720:Flat cornea; HP:0004428:Elfin facies; HP:0004295:Abnormality of the gastric mucosa; HP:0002623:Overriding aorta; HP:0010780:Hyperacusis; HP:00…	Dabrafenib; Fostamatinib	Degeneration of spine; Atrophy/Degeneration involving the corticospinal tracts; Functional abnormality of male internal genitalia; Nystagmus-induced head nodding; Overfriendliness; Abnormality of the diencephalon; Elfin facies; Abnormality of the gastric mucosa; Pelvic kidney; Abnormality of the ankles; Colon diverticulum anatomic structure; Overriding aorta; Bladder Diverticulum; Phonophobia; Ac…	85	142	[{"UniProt":"P53667","EnsemblGene":["ENSG00000106683"],"SwissProt":["LIMK1_HUMAN"]}]		Distribution: Detected in all; Specificity: Tissue enhanced	antibody: Moderate cytoplasmic and membranous positivity was observed in gastrointestinal glands, gallbladder, urothelium, bone marrow poietic cells, endometrial and cervical glands. Axonal projections in CNS and subset of cells in red pulp of spleen were strongly stained.; Cytoplasmic expression in most tissues.	Antibody: Moderate immunoreactivity in a few cases of colorectal and endometrial cancers. Remaining cancer tissues were weakly stained or negative.	(M16801)SIG REGULATION OF THE ACTIN CYTOSKELETON BY RHO GTPASES; (M5193)SIG CHEMOTAXIS; (M12)PID RHOA PATHWAY	(ko04666)Fc gamma R-mediated phagocytosis; (hsa04666)Fc gamma R-mediated phagocytosis; (ko04360)Axon guidance				(M9152)BIOCARTA CCR3 PATHWAY; (M10547)BIOCARTA MAL PATHWAY; (M8601)BIOCARTA RAC1 PATHWAY
		Epha1	2041	EPHA1	EPH|EPHT|EPHT1	protein-coding	EPH receptor A1	This gene belongs to the ephrin receptor subfamily of the protein-tyrosine kinase family. EPH and EPH-related receptors have been implicated in mediating developmental events, particularly in the nervous system. Receptors in the EPH subfamily typically have a single kinase domain and an extracellular region containing a Cys-rich domain and 2 fibronectin type III repeats. The ephrin receptors are …	chr7:143408865-143390813	GO:0051496 positive regulation of stress fiber assembly;GO:0001954 positive regulation of cell-matrix adhesion;GO:0032233 positive regulation of actin filament bundle assembly	[GO:0005575] cellular_component; [GO:0003674] molecular_function; [GO:0043167] ion binding; [GO:0008150] biological_process; [GO:0006464] cellular protein modification process; [GO:0005886] plasma membrane; [GO:0016301] kinase activity; [GO:0007165] signal transduction; [GO:0007155] cell adhesion; [GO:0048856] anatomical structure development; [GO:0048646] anatomical structure formation involved …	GO:0043235 receptor complex;GO:0043005 neuron projection;GO:0005887 integral component of plasma membrane	GO:0005005 transmembrane-ephrin receptor activity;GO:0005003 ephrin receptor activity;GO:0004714 transmembrane receptor protein tyrosine kinase activity	Tyr protein kinase family	Cancer-related genes:Candidate cancer biomarkers; Kinases:Tyr protein kinases; ENZYME proteins:Transferases; Enzymes	[IPR000719] Protein kinase domain; [IPR001090] Ephrin receptor ligand binding domain; [IPR001245] Serine-threonine/tyrosine-protein kinase, catalytic domain; [IPR001426] Tyrosine-protein kinase, receptor class V, conserved site; [IPR001660] Sterile alpha motif domain; [IPR003961] Fibronectin type III; [IPR008266] Tyrosine-protein kinase, active site; [IPR008979] Galactose-binding-like domain supe…				yes	yes	yes		yes	MP:0005376 homeostasis/metabolism phenotype; MP:0005378 growth/size/body region phenotype; MP:0005387 immune system phenotype; MP:0005389 reproductive system phenotype; MP:0005371 limbs/digits/tail phenotype		OMIM ID:179610 Ephrin receptor epha1		alpha-Macroglobulins					Fostamatinib	Craniofrontonasal dysplasia; Cystadenoma, Serous; High Grade Intraepithelial Neoplasia; Age-related cataract; Acute Confusional Senile Dementia; Alzheimer's Disease, Focal Onset; AIDS related complex; Cystadenocarcinoma, Serous; Neurofibromatosis 2; Skin carcinoma; Ovarian Serous Adenocarcinoma; Bilateral cataracts (disorder); Tumor Promotion; Alzheimer Disease, Early Onset; Intraepithelial Neopl…	40	73	[{"UniProt":"P21709","EnsemblGene":["ENSG00000146904","ENSG00000284816"],"SwissProt":["EPHA1_HUMAN"]}]		Distribution: Detected in many; Specificity: Tissue enhanced	antibody: Most of the normal tissues showed moderate to strong cytoplasmic and membranous positivity. Salivary gland, glomeruli, endometrial stroma and a subset of cells in CNS showed weak staining.; Cytoplasmic and membranous expression in most tissues, including parathyroid gland.	Antibody: Cancer tissues showed moderate immunoreactivity. Several cases of colorectal cancers showed strong cytoplasmic and membranous positivity. Gliomas and lymphomas were weakly stained or negative.	(M177)PID EPHA FWDPATHWAY	(ko04360)Axon guidance; (hsa04360)Axon guidance
		Serpinf1	5176	SERPINF1	EPC-1|OI12|OI6|PEDF|PIG35	protein-coding	serpin family F member 1	This gene encodes a member of the serpin family that does not display the serine protease inhibitory activity shown by many of the other serpin proteins. The encoded protein is secreted and strongly inhibits angiogenesis. In addition, this protein is a neurotrophic factor involved in neuronal differentiation in retinoblastoma cells. Mutations in this gene were found in individuals with osteogenes…	chr17:1762060-1777565	GO:0071279 cellular response to cobalt ion;GO:0060770 negative regulation of epithelial cell proliferation involved in prostate gland development;GO:0032025 response to cobalt ion	[GO:0005575] cellular_component; [GO:0005576] extracellular region; [GO:0005615] extracellular space; [GO:0008150] biological_process; [GO:0048856] anatomical structure development; [GO:0048646] anatomical structure formation involved in morphogenesis; [GO:0030154] cell differentiation; [GO:0003674] molecular_function; [GO:0005737] cytoplasm; [GO:0005622] intracellular; [GO:0043226] organelle; [G…	GO:0043203 axon hillock;GO:0005604 basement membrane;GO:0042470 melanosome	GO:0004867 serine-type endopeptidase inhibitor activity;GO:0004866 endopeptidase inhibitor activity;GO:0030414 peptidase inhibitor activity		Cancer-related genes:Candidate cancer biomarkers; Disease related genes; Predicted secreted proteins; Predicted intracellular proteins	[IPR000215] Serpin family; [IPR023796] Serpin domain; [IPR036186] Serpin superfamily; [IPR042178] Serpin superfamily, domain 1; [IPR023795] Serpin, conserved site; [IPR033832] Pigment epithelium derived factor; [IPR042185] Serpin superfamily, domain 2		yes	yes			yes	principal1		MP:0005385 cardiovascular system phenotype; MP:0005378 growth/size/body region phenotype; MP:0005381 digestive/alimentary phenotype; MP:0005387 immune system phenotype; MP:0005389 reproductive system phenotype; MP:0003631 nervous system phenotype; MP:0005391 vision/eye phenotype; MP:0005390 skeleton phenotype; MP:0005397 hematopoietic system phenotype; MP:0005379 endocrine/exocrine gland phenotyp…	[ORPHA:216812] Osteogenesis imperfecta type 3; [ORPHA:216820] Osteogenesis imperfecta type 4	OMIM ID:172860 Serpin peptidase inhibitor, clade f, member 1	Osteogenesis imperfecta, type VI				Clinvar: phenotype not specified: likely pathogenic,not provided,pathogenic; Osteogenesis imperfecta, type vi: not provided,pathogenic	HP:0003179:Protrusio acetabuli; HP:0004568:Beaking of vertebral bodies; HP:0004586:Biconcave vertebral bodies; HP:0002953:Vertebral compression fractures; HP:0002659:Increased susceptibility to fractures; HP:0002812:Coxa vara; HP:0001388:Joint laxity; HP:0000007:Autosomal recessive inheritance	Copper	Alpha-2-antiplasmin deficiency; Familial hemorrhagic diathesis; Olfaction Disorders; Myopia, Progressive; Osteogenesis Imperfecta, Type VI; Fibrin thrombus; Osteogenesis imperfecta, type 5; Pancreatic steatosis; Diabetic keratopathy; Corneal Sensitivity; Visually threatening diabetic retinopathy; Hypoplasminogenemia; Protrusio acetabuli; Osteogenesis imperfecta type IV (disorder); Beaking of vert…	265	313	[{"UniProt":"P36955","EnsemblGene":["ENSG00000132386"],"EnsemblTrans":[["ENST00000254722","ENSP00000254722","principal1"]],"RefSeq":[["NM_001329903","NP_001316832","REVIEWED"],["NM_002615","NP_002606","REVIEWED"]],"UCSC":["uc002ftl.4"],"SwissProt":["PEDF_HUMAN"]},{"UniProt":"A0A140VKF3","RefSeq":[["NM_001329903","NP_001316832","REVIEWED"],["NM_002615","NP_002606","REVIEWED"]],"SwissProt":["A0A140…		Distribution: Detected in many; Specificity: Tissue enhanced	antibody: Breast, seminal vesicle, epididymis, testis, renal tubules, stomach and neuronal cells of CNS displayed moderate to strong cytoplasmic immunoreactivity with granular pattern. Pancreatic islets displayed moderate staining while exocrine pancreas was negative. Plasma positivity was observed in several tissues.; RNA-based expert annotation gave inconclusive results.	Antibody: Several cases of melanoma, gliomas, skin, breast and endometrial cancers showed moderate to strong cytoplasmic positivity. Other cancer tissues were weakly stained or negative.	(M3468)NABA ECM REGULATORS; (M5885)NABA MATRISOME ASSOCIATED; (M5889)NABA MATRISOME	(ko04310)Wnt signaling pathway; (hsa04310)Wnt signaling pathway
		Tmed3	23423	TMED3	C15orf22|P24B|p24g4|p24gamma4|p26	protein-coding	transmembrane p24 trafficking protein 3		chr15:79311112-79413886	GO:0006890 retrograde vesicle-mediated transport, Golgi to ER;GO:0007030 Golgi organization;GO:0006888 ER to Golgi vesicle-mediated transport	[GO:0005575] cellular_component; [GO:0008150] biological_process; [GO:0006810] transport; [GO:0015031] protein transport; [GO:0005737] cytoplasm; [GO:0005622] intracellular; [GO:0043226] organelle; [GO:0005794] Golgi apparatus; [GO:0005783] endoplasmic reticulum; [GO:0031410] cytoplasmic vesicle; [GO:0032991] protein-containing complex; [GO:0016192] vesicle-mediated transport	GO:0030126 COPI vesicle coat;GO:0030663 COPI-coated vesicle membrane;GO:0030137 COPI-coated vesicle			Transporters; Predicted intracellular proteins	[IPR009038] GOLD domain; [IPR015720] TMP21-related; [IPR036598] GOLD domain superfamily	Golgi apparatus (reliability'])			yes	yes			yes	MP:0005387 immune system phenotype; MP:0005397 hematopoietic system phenotype				Cholesterol;Respiratory Function Tests						Interleukin 18 Measurement; Tumor thrombus; Nijmegen Breakage Syndrome; Malignant neoplasm of colon stage IV; Mechanical Allodynia; Serum albumin measurement; Retinitis Pigmentosa; Anemia; Secondary malignant neoplasm of lung; Sepsis; Conventional (Clear Cell) Renal Cell Carcinoma; Secondary Neoplasm; Colon Carcinoma; Malignant tumor of colon; Prostate carcinoma; Malignant neoplasm of prostate; L…	3	19	[{"UniProt":"F5H4M7","EnsemblGene":["ENSG00000166557"],"EnsemblTrans":[["ENST00000536821","ENSP00000446062",""]],"RefSeq":[["NM_001301203","NP_001288132","VALIDATED"]],"UCSC":["uc059mhp.1"],"SwissProt":["F5H4M7_HUMAN"]},{"UniProt":"Q9Y3Q3","EnsemblGene":["ENSG00000166557"],"SwissProt":["TMED3_HUMAN"]},{"UniProt":"A0A140VKD1","RefSeq":[["NM_007364","NP_031390","VALIDATED"]],"SwissProt":["A0A140VKD…		Distribution: Detected in all; Specificity: Tissue enhanced	General nuclear and cytoplasmic expression.; antibody: Most of the normal cells showed moderate nuclear positivity with additional cytoplasmic staining in several cases. Placental trophoblasts and epididymis were strongly stained. Myocytes, neuronal cells and adipocytes were weakly stained.	Antibody: Most cancer cells showed moderate nuclear positivity with additional cytoplasmic staining in several cases. Several cases of testis cancers along with a few lung and urothelial cancers were strongly stained. Most cases of renal cancers were negative.
		Mrvi1	10335	IRAG1	IRAG|JAW1L|MRVI1	protein-coding	inositol 1,4,5-triphosphate receptor associated 1	This gene is similar to a putative mouse tumor suppressor gene (Mrvi1) that is frequently disrupted by mouse AIDS-related virus (MRV). The encoded protein, which is found in the membrane of the endoplasmic reticulum, is similar to Jaw1, a lymphoid-restricted protein whose expression is down-regulated during lymphoid differentiation. This protein is a substrate of cGMP-dependent kinase-1 (PKG1) th…	chr11:10693755-10573095	GO:0019934 cGMP-mediated signaling;GO:0019935 cyclic-nucleotide-mediated signaling;GO:0019932 second-messenger-mediated signaling	[GO:0005575] cellular_component; [GO:0005737] cytoplasm; [GO:0005622] intracellular; [GO:0043226] organelle; [GO:0005783] endoplasmic reticulum; [GO:0003674] molecular_function; [GO:0007165] signal transduction; [GO:0008150] biological_process	GO:0031095 platelet dense tubular network membrane;GO:0031094 platelet dense tubular network;GO:0016529 sarcoplasmic reticulum	GO:0005515 protein binding;GO:0005488 binding;GO:0003674 molecular_function		Predicted intracellular proteins	[IPR008677] MRVI1	Cytosol (reliability']); Additional: Nuclear bodies			yes	yes			yes	MP:0005385 cardiovascular system phenotype; MP:0010768 mortality/aging; MP:0005369 muscle phenotype; MP:0005381 digestive/alimentary phenotype		OMIM ID:604673 Murine retrovirus integration site 1, homolog of		Cholesterol;Cholesterol, LDL;Platelet Function Tests;Transforming Growth Factor beta	Mental Disorders;Migraine Disorders;Platelet Aggregation					Platelet aggregation; Thrombosis; Moyamoya Disease; Respiratory Tract Diseases; Platelet mean volume determination (procedure); Childhood asthma; Neurofibromatosis 1; Headache; Myeloid Leukemia; Migraine Disorders; Red Blood Cell Count measurement; Systolic Pressure; Blood Protein Measurement; Endometrial Carcinoma; Coronary Artery Disease; Asthma; leukemia; Neoplasm Metastasis; Tumor Cell Invasi…	11	25	[{"UniProt":"Q9Y6F6","EnsemblGene":["ENSG00000072952"],"SwissProt":["IRAG1_HUMAN"]}]		Distribution: Detected in all; Specificity: Low tissue specificity	antibody: A majority of normal tissues showed moderate cytoplasmic immunoreactivity. Strong staining was observed in lymphoid germinal center cells and in the intestine.; Ubiquitous cytoplasmic expression.	Antibody: Most malignant cells showed moderate cytoplasmic immunoreactivity.		(ko04270)Vascular smooth muscle contraction; (hsa04270)Vascular smooth muscle contraction; (ko04022)cGMP-PKG signaling pathway
		Cspg4	1464	CSPG4	CSPG4A|HMW-MAA|MCSP|MCSPG|MEL-CSPG|MSK16|NG2	protein-coding	chondroitin sulfate proteoglycan 4	A human melanoma-associated chondroitin sulfate proteoglycan plays a role in stabilizing cell-substratum interactions during early events of melanoma cell spreading on endothelial basement membranes. CSPG4 represents an integral membrane chondroitin sulfate proteoglycan expressed by human malignant melanoma cells. [provided by RefSeq, Jul 2008]	chr15:75712848-75674322	GO:0030208 dermatan sulfate biosynthetic process;GO:0030205 dermatan sulfate metabolic process;GO:0030207 chondroitin sulfate catabolic process	[GO:0005575] cellular_component; [GO:0007165] signal transduction; [GO:0008150] biological_process; [GO:0005622] intracellular; [GO:0043226] organelle; [GO:0005634] nucleus; [GO:0005654] nucleoplasm; [GO:0005886] plasma membrane; [GO:0048856] anatomical structure development; [GO:0030154] cell differentiation; [GO:0048646] anatomical structure formation involved in morphogenesis; [GO:0005576] ext…	GO:0031258 lamellipodium membrane;GO:0043202 lysosomal lumen;GO:0005796 Golgi lumen	GO:0015026 coreceptor activity;GO:0019901 protein kinase binding;GO:0019900 kinase binding			[IPR001791] Laminin G domain; [IPR013320] Concanavalin A-like lectin/glucanase domain superfamily; [IPR039005] CSPG repeat	Plasma membrane (reliability']); Additional: Nucleoplasm			yes	yes		principal1	yes	MP:0005370 liver/biliary system phenotype; MP:0005376 homeostasis/metabolism phenotype; MP:0005384 cellular phenotype; MP:0005378 growth/size/body region phenotype; MP:0005387 immune system phenotype; MP:0003631 nervous system phenotype; MP:0005397 hematopoietic system phenotype; MP:0005375 adipose tissue phenotype		OMIM ID:601172 Chondroitin sulfate proteoglycan 4								Muscular dystrophy congenital, merosin negative; Ullrich congenital muscular dystrophy 1; Secondary malignant neoplasm of skin; Glial scar; Angiomyolipoma; Behavioral and psychological symptoms of dementia; Experimental Autoimmune Encephalomyelitis; Chordoma; Adult Oligodendroglioma; Childhood Oligodendroglioma; Neoplasms, Intracranial; Non-Metastatic Childhood Soft Tissue Sarcoma; Adult Soft Tis…	71	99	[{"UniProt":"Q6UVK1","EnsemblGene":["ENSG00000173546"],"EnsemblTrans":[["ENST00000308508","ENSP00000312506","principal1"]],"RefSeq":[["NM_001897","NP_001888","REVIEWED"]],"UCSC":["uc002baw.3"],"SwissProt":["CSPG4_HUMAN"]}]	skin	Distribution: Detected in all; Specificity: Low tissue specificity	Ubiquitous granular cytoplasmic expression.		(M18)PID INTEGRIN1 PATHWAY; (M5880)NABA ECM AFFILIATED; (M5885)NABA MATRISOME ASSOCIATED
		Osr1	130497	OSR1	ODD	protein-coding	odd-skipped related transcription factor 1		chr2:19358623-19351485	GO:0072165 anterior mesonephric tubule development;GO:0072167 specification of mesonephric tubule identity;GO:0072168 specification of anterior mesonephric tubule identity	[GO:0003674] molecular_function; [GO:0008150] biological_process; [GO:0034641] cellular nitrogen compound metabolic process; [GO:0009058] biosynthetic process; [GO:0005575] cellular_component; [GO:0005622] intracellular; [GO:0043226] organelle; [GO:0005634] nucleus; [GO:0043167] ion binding; [GO:0008219] cell death; [GO:0003677] DNA binding; [GO:0003700] DNA-binding transcription factor activity;…	GO:0019898 extrinsic component of membrane;GO:0000790 nuclear chromatin;GO:0000785 chromatin	GO:0000977 RNA polymerase II regulatory region sequence-specific DNA binding;GO:0001012 RNA polymerase II regulatory region DNA binding;GO:0000981 DNA-binding transcription factor activity, RNA polymerase II-specific		Transcription factors:Zinc-coordinating DNA-binding domains; Predicted intracellular proteins	[IPR013087] Zinc finger C2H2-type; [IPR036236] Zinc finger C2H2 superfamily							principal1		MP:0005367 renal/urinary system phenotype; MP:0005385 cardiovascular system phenotype; MP:0010768 mortality/aging; MP:0005376 homeostasis/metabolism phenotype; MP:0005384 cellular phenotype; MP:0005389 reproductive system phenotype; MP:0005371 limbs/digits/tail phenotype; MP:0005379 endocrine/exocrine gland phenotype; MP:0005380 embryo phenotype; MP:0005388 respiratory system phenotype		OMIM ID:608891 Odd-skipped-related 1		Body Mass Index;Child Development Disorders, Pervasive;Echocardiography;Iron;Pulse Wave Analysis;Stroke;Tunica Media	3-hydroxy-1-methylpropylmercapturic acid;Blood Pressure;Carcinoma, Non-Small-Cell Lung;Coronary Artery Disease;Coronary Disease;Eyebrows;Fenofibrate;Myocardial Infarction;Smoking;irinotecan					Emotional disorder; Developmental failure of fusion; Primary vesicoureteric reflux; Post-Hemorrhagic Hydrocephalus; Congenital failure of fusion; Disruptive Behavior Disorder; ARTHROGRYPOSIS MULTIPLEX CONGENITA, DISTAL, TYPE IIA; Hyperkalemic Mineralocorticoid Resistance; Developmental Coordination Disorder; Oppositional Defiant Disorder; Pseudohypoaldosteronism, Type II; Alpers Syndrome (disorde…	12	30	[{"UniProt":"Q8TAX0","EnsemblGene":["ENSG00000143867"],"EnsemblTrans":[["ENST00000272223","ENSP00000272223","principal1"]],"RefSeq":[["NM_145260","NP_660303","VALIDATED"],["XM_006711942","XP_006712005","MODEL"]],"UCSC":["uc002rdc.4"],"SwissProt":["OSR1_HUMAN"]}]		Distribution: Detected in many; Specificity: Tissue enhanced	antibody: Most normal tissues were negative. Renal glomeruli showed distinct moderate cytoplasmic positivity.; Estimation of protein expression could not be performed. View primary data.	Antibody: Most cancers were negative.
		Tgfb1i1	7041	TGFB1I1	ARA55|HIC-5|HIC5|TSC-5	protein-coding	transforming growth factor beta 1 induced transcript 1	This gene encodes a coactivator of the androgen receptor, a transcription factor which is activated by androgen and has a key role in male sexual differentiation. The encoded protein is thought to regulate androgen receptor activity and may have a role to play in the treatment of prostate cancer. Multiple transcript variants encoding different isoforms have been found for this gene. [provided by …	chr16:31472152-31477960	GO:0030579 ubiquitin-dependent SMAD protein catabolic process;GO:0030511 positive regulation of transforming growth factor beta receptor signaling pathway;GO:1903846 positive regulation of cellular response to transforming growth factor beta stimulus	[GO:0008150] biological_process; [GO:0030154] cell differentiation; [GO:0048856] anatomical structure development; [GO:0007165] signal transduction; [GO:0005575] cellular_component; [GO:0005622] intracellular; [GO:0043226] organelle; [GO:0005634] nucleus; [GO:0005737] cytoplasm; [GO:0003674] molecular_function; [GO:0043167] ion binding; [GO:0005856] cytoskeleton; [GO:0007267] cell-cell signaling;…	GO:0016363 nuclear matrix;GO:0034399 nuclear periphery;GO:0005925 focal adhesion	GO:0048495 Roundabout binding;GO:0070411 I-SMAD binding;GO:0050681 androgen receptor binding		Predicted intracellular proteins	[IPR001781] Zinc finger, LIM-type; [IPR017305] Leupaxin/Paxillin/TGFB1I1	Focal adhesion sites (reliability']); Additional: Cytosol								MP:0005385 cardiovascular system phenotype; MP:0005369 muscle phenotype; MP:0005376 homeostasis/metabolism phenotype; MP:0005379 endocrine/exocrine gland phenotype; MP:0010771 integument phenotype		OMIM ID:602353 Transforming growth factor, beta-1-induced 1								Proliferative glomerulonephritis; Progesterone Resistance; Intestinal fibrosis; Nonnuclear polymorphic congenital cataract; Fibrosis of pancreas; Obstructive azoospermia; Aqueous Humor Disorders; Azoospermia, Nonobstructive; Androgenetic Alopecia; Cicatrix, Hypertrophic; Intraocular pressure disorder; Pancreatitis, Chronic; Glomerulonephritis; Progression of prostate cancer; Adrenal Gland Pheochr…	50	105	[{"UniProt":"O43294","EnsemblGene":["ENSG00000140682"],"SwissProt":["TGFI1_HUMAN"]},{"UniProt":"A0A024QZE7","RefSeq":[["NM_001164719","NP_001158191","REVIEWED"],["NM_015927","NP_057011","REVIEWED"]],"SwissProt":["A0A024QZE7_HUMAN"]}]		Distribution: Detected in many; Specificity: Low tissue specificity	Cytoplasmic expression in most tissues, including smooth muscle.; antibody: Weak to moderate cytoplasmic immunoreactivity was observed in most normal tissues. Liver, CNS tissue, renal tubules and lymphoid cells in reaction centra of lymh nodes were weakly stained or negative.	Antibody: Moderate granular cytoplasmic staining was observed in prostate cancers, several cases of colorectal, breast, endometrial, pancreatic cancers and squamous cell carcinomas showed moderate granular cytoplasmic staining. Remaining cancers were weakly stained or negative.	(M58)PID AR PATHWAY
		Prelp	5549	PRELP	MST161|MSTP161|SLRR2A	protein-coding	proline and arginine rich end leucine rich repeat protein	The protein encoded by this gene is a leucine-rich repeat protein present in connective tissue extracellular matrix. This protein functions as a molecule anchoring basement membranes to the underlying connective tissue. This protein has been shown to bind type I collagen to basement membranes and type II collagen to cartilage. It also binds the basement membrane heparan sulfate proteoglycan perle…	chr1:203475806-203491352	GO:0042340 keratan sulfate catabolic process;GO:0018146 keratan sulfate biosynthetic process;GO:0042339 keratan sulfate metabolic process	[GO:0003674] molecular_function; [GO:0005198] structural molecule activity; [GO:0005575] cellular_component; [GO:0005576] extracellular region; [GO:0031012] extracellular matrix; [GO:0005615] extracellular space; [GO:0043226] organelle; [GO:0008150] biological_process; [GO:0048856] anatomical structure development; [GO:0005773] vacuole; [GO:0005737] cytoplasm; [GO:0005622] intracellular; [GO:0005…	GO:0043202 lysosomal lumen;GO:0005796 Golgi lumen;GO:0005775 vacuolar lumen	GO:0030021 extracellular matrix structural constituent conferring compression resistance;GO:0008201 heparin binding;GO:0005201 extracellular matrix structural constituent		Predicted secreted proteins	[IPR000372] Leucine-rich repeat N-terminal domain; [IPR001611] Leucine-rich repeat; [IPR003591] Leucine-rich repeat, typical subtype; [IPR027216] Prolargin; [IPR032675] Leucine-rich repeat domain superfamily		yes	yes			yes	principal1		MP:0005376 homeostasis/metabolism phenotype		OMIM ID:601914 Proline-arginine-rich end leucine-rich repeat protein		Schizophrenia	Body Composition					Chocolate cyst of ovary; Progeria; Severe myopia; Endometrioma; Malignant lymphoma, lymphocytic, intermediate differentiation, diffuse; Inflammatory disorder; Meningioma, benign, no ICD-O subtype; Adult Meningioma; Mantle cell lymphoma; Meningioma; Hematologic Neoplasms; Blood Protein Measurement; Endometriosis; Psoriasis; ANOPHTHALMIA AND PULMONARY HYPOPLASIA; Chronic Lymphocytic Leukemia; Degen…	11	32	[{"UniProt":"P51888","EnsemblGene":["ENSG00000188783"],"EnsemblTrans":[["ENST00000343110","ENSP00000343924","principal1"]],"RefSeq":[["NM_002725","NP_002716","REVIEWED"],["NM_201348","NP_958505","REVIEWED"]],"UCSC":["uc001gzs.4"],"SwissProt":["PRELP_HUMAN"]}]		Distribution: Detected in all; Specificity: Tissue enhanced			(M5882)NABA PROTEOGLYCANS; (M5884)NABA CORE MATRISOME; (M5889)NABA MATRISOME
		Kifc3	3801	KIFC3		protein-coding	kinesin family member C3	This gene encodes a member of the kinesin-14 family of microtubule motors. Members of this family play a role in the formation, maintenance and remodeling of the bipolar mitotic spindle. The protein encoded by this gene has cytoplasmic functions in the interphase cells. It may also be involved in the final stages of cytokinesis. Alternative splicing results in multiple transcript variants encodin…	chr16:57863053-57758217	GO:0045218 zonula adherens maintenance;GO:0034334 adherens junction maintenance;GO:0045217 cell-cell junction maintenance	[GO:0003674] molecular_function; [GO:0043167] ion binding; [GO:0008092] cytoskeletal protein binding; [GO:0008150] biological_process; [GO:0016887] ATPase activity; [GO:0005575] cellular_component; [GO:0005737] cytoplasm; [GO:0005622] intracellular; [GO:0043226] organelle; [GO:0005856] cytoskeleton; [GO:0031410] cytoplasmic vesicle; [GO:0005815] microtubule organizing center; [GO:0005576] extrace…	GO:0005915 zonula adherens;GO:0005913 cell-cell adherens junction;GO:0005871 kinesin complex	GO:0008569 ATP-dependent microtubule motor activity, minus-end-directed;GO:1990939 ATP-dependent microtubule motor activity;GO:0003777 microtubule motor activity		Cancer-related genes:Mutational cancer driver genes; Predicted intracellular proteins	[IPR001752] Kinesin motor domain; [IPR019821] Kinesin motor domain, conserved site; [IPR027325] Kinesin-like protein KIFC3-like; [IPR027417] P-loop containing nucleoside triphosphate hydrolase; [IPR027640] Kinesin-like protein; [IPR036961] Kinesin motor domain superfamily							alternative2				OMIM ID:604535 Kinesin family member c3		Nutritional and Metabolic Diseases;Platelet Function Tests						Bardet-Biedl Syndrome; Cholestasis of pregnancy; AMYOTROPHIC LATERAL SCLEROSIS 1; Basal-Like Breast Carcinoma; Tumor Cell Invasion	8	42	[{"UniProt":"B7Z896","EnsemblGene":["ENSG00000140859"],"EnsemblTrans":[["ENST00000543930","ENSP00000444012","alternative2"]],"RefSeq":[["NM_001318713","NP_001305642","REVIEWED"]],"UCSC":["uc010vhx.3"],"SwissProt":["B7Z896_HUMAN"]},{"UniProt":"F5H3M2","EnsemblGene":["ENSG00000140859"],"EnsemblTrans":[["ENST00000540079","ENSP00000438805","alternative2"]],"RefSeq":[["NM_001318712","NP_001305641","RE…		Distribution: Detected in all; Specificity: Low tissue specificity	antibody: Strong cytoplasmic positivity was observed in exocrine pancreas, decidual cells and testis. Remaining normal tissues were weakly stained or negative.; Cytoplasmic expression in a few tissues.	Antibody: Endometrial cancers and several colorectal, liver and ovarian cancers displayed weak to moderate cytoplasmic positivity. Remaining cancers were generally negative.	(M232)PID ECADHERIN STABILIZATION PATHWAY				(M5909)HALLMARK MYOGENESIS
		Tpst2	8459	TPST2	TANGO13B|TPST-2	protein-coding	tyrosylprotein sulfotransferase 2	The protein encoded by this gene catalyzes the O-sulfation of tyrosine residues within acidic regions of proteins. The encoded protein is a type II integral membrane protein found in the Golgi body. Alternative splicing produces multiple transcript variants encoding distinct isoforms. [provided by RefSeq, May 2018]	chr22:26590132-26521996	GO:0006478 peptidyl-tyrosine sulfation;GO:0006477 protein sulfation;GO:0051923 sulfation	[GO:0003674] molecular_function; [GO:0008150] biological_process; [GO:0006464] cellular protein modification process; [GO:0006790] sulfur compound metabolic process; [GO:0005575] cellular_component; [GO:0005737] cytoplasm; [GO:0005622] intracellular; [GO:0043226] organelle; [GO:0005794] Golgi apparatus; [GO:0005783] endoplasmic reticulum; [GO:0034641] cellular nitrogen compound metabolic process;…	GO:0000139 Golgi membrane;GO:0098791 Golgi subcompartment;GO:0044431 Golgi apparatus part	GO:0008476 protein-tyrosine sulfotransferase activity;GO:0008146 sulfotransferase activity;GO:0016782 transferase activity, transferring sulfur-containing groups		ENZYME proteins:Transferases; Predicted intracellular proteins; Enzymes	[IPR026634] Protein-tyrosine sulfotransferase; [IPR027417] P-loop containing nucleoside triphosphate hydrolase				yes			principal1	yes	MP:0005376 homeostasis/metabolism phenotype; MP:0005384 cellular phenotype; MP:0005378 growth/size/body region phenotype; MP:0005389 reproductive system phenotype; MP:0003631 nervous system phenotype; MP:0005379 endocrine/exocrine gland phenotype		OMIM ID:603126 Tyrosylprotein sulfotransferase 2								Pancreatitis, Chronic; Blood Protein Measurement	7	27	[{"UniProt":"O60704","EnsemblGene":["ENSG00000128294"],"EnsemblTrans":[["ENST00000338754","ENSP00000339813","principal1"],["ENST00000398110","ENSP00000381180","principal1"],["ENST00000403880","ENSP00000385192","principal1"]],"RefSeq":[["NM_001008566","NP_001008566","REVIEWED"],["NM_003595","NP_003586","REVIEWED"]],"UCSC":["uc003acw.4"],"SwissProt":["TPST2_HUMAN"]},{"UniProt":"A0A024R1G9","RefSeq"…	placenta	Distribution: Detected in all; Specificity: Group enriched	antibody: Exocrine pancreas, male genitalia and endometrial glands displayed strong cytoplasmic staining with a granular pattern. The remaining normal tissues generally showed weak to moderate cytoplasmic staining.; General cytoplasmic expression with a granular pattern.	Antibody: Most cancer cells exhibited weak to moderate cytoplasmic immunoreactivity. Cases of testicular and endometrial cancers showed strong staining. Several gastric cancers, gliomas and lymphomas were negative.					(M5891)HALLMARK HYPOXIA
		Crlf1	9244	CRLF1	CISS|CISS1|CLF|CLF-1|NR6|zcytor5	protein-coding	cytokine receptor like factor 1	This gene encodes a member of the cytokine type I receptor family. The protein forms a secreted complex with cardiotrophin-like cytokine factor 1 and acts on cells expressing ciliary neurotrophic factor receptors. The complex can promote survival of neuronal cells. Mutations in this gene result in Crisponi syndrome and cold-induced sweating syndrome. [provided by RefSeq, Oct 2009]	chr19:18606799-18593237	GO:2000672 negative regulation of motor neuron apoptotic process;GO:2000671 regulation of motor neuron apoptotic process;GO:0097049 motor neuron apoptotic process	[GO:0003674] molecular_function; [GO:0008150] biological_process; [GO:0008283] cell population proliferation; [GO:0007165] signal transduction; [GO:0006464] cellular protein modification process; [GO:0005575] cellular_component; [GO:0005576] extracellular region; [GO:0005886] plasma membrane; [GO:0005737] cytoplasm; [GO:0005622] intracellular; [GO:0005829] cytosol; [GO:0005615] extracellular spac…	GO:0097058 CRLF-CLCF1 complex;GO:0009897 external side of plasma membrane;GO:0043235 receptor complex	GO:0005127 ciliary neurotrophic factor receptor binding;GO:0004896 cytokine receptor activity;GO:0019955 cytokine binding		Disease related genes; Predicted secreted proteins; Predicted intracellular proteins	[IPR003961] Fibronectin type III; [IPR013783] Immunoglobulin-like fold; [IPR015152] Growth hormone/erythropoietin receptor, ligand binding; [IPR036116] Fibronectin type III superfamily; [IPR036179] Immunoglobulin-like domain superfamily		yes	yes				principal1		MP:0010768 mortality/aging; MP:0005386 behavior/neurological phenotype; MP:0003631 nervous system phenotype; MP:0005397 hematopoietic system phenotype	[ORPHA:157820] Cold-induced sweating syndrome; [ORPHA:1545] CRISPONI SYNDROME; [ORPHA:930] Idiopathic achalasia	OMIM ID:604237 Cytokine receptor-like factor 1	Cold-induced sweating syndrome 1; Crisponi/Cold-induced sweating syndrome				Cold-induced sweating syndrome 1: pathogenic; Clinvar: phenotype not specified: pathogenic	HP:0100729:Large face; HP:0000211:Trismus; HP:0002047:Malignant hyperthermia; HP:0001377:Limited elbow extension; HP:0002179:Opisthotonus; HP:0000491:Keratitis; HP:0001954:Recurrent fever; HP:0009466:Radial deviation of finger; HP:0002987:Elbow flexion contracture; HP:0000966:Hypohidrosis; HP:0001181:Adducted thumb; HP:0001376:Limitation of joint mobility; HP:0001182:Tapered finger; HP:0000445:Wi…		Neurovascular conflict; Arrested hydrocephalus; COLD-INDUCED SWEATING SYNDROME 1; COLD-INDUCED SWEATING SYNDROME 2; Convergence Insufficiency; Bohring syndrome; Comitant heterophoria; Crisponi syndrome; STUVE-WIEDEMANN SYNDROME; Dermatofibrosis lenticularis disseminata; Large face; Idiopathic achalasia of esophagus; Trismus; Siderosis; Limited elbow extension; Opisthotonus; Spinal stenosis of lum…	10	27	[{"UniProt":"O75462","EnsemblGene":["ENSG00000006016"],"EnsemblTrans":[["ENST00000392386","ENSP00000376188","principal1"]],"RefSeq":[["NM_004750","NP_004741","REVIEWED"]],"UCSC":["uc010ebt.3"],"SwissProt":["CRLF1_HUMAN"]}]	liver;tongue	Distribution: Detected in many; Specificity: Low tissue specificity	antibody: Most normal tissues displayed moderate cytoplasmic positivity. Strong staining was observed in duodenum, renal tubules, adrenal cortex and breast. Plasma were positive. ; General cytoplasmic expression. Additional plasma positivity.	Antibody: Malignant cells displayed weak to moderate cytoplasmic positivity. Strong staining was observed in a few cases of renal cancers.	(M5883)NABA SECRETED FACTORS; (M5885)NABA MATRISOME ASSOCIATED; (M5889)NABA MATRISOME				(M5930)HALLMARK EPITHELIAL MESENCHYMAL TRANSITION
		Nuak1	9891	NUAK1	ARK5	protein-coding	NUAK family kinase 1		chr12:106138954-106063345	GO:0035507 regulation of myosin-light-chain-phosphatase activity;GO:0042149 cellular response to glucose starvation;GO:2000772 regulation of cellular senescence	[GO:0003674] molecular_function; [GO:0043167] ion binding; [GO:0008150] biological_process; [GO:0006464] cellular protein modification process; [GO:0016301] kinase activity; [GO:0005575] cellular_component; [GO:0005622] intracellular; [GO:0043226] organelle; [GO:0005634] nucleus; [GO:0005737] cytoplasm; [GO:0005654] nucleoplasm; [GO:0005730] nucleolus; [GO:0007155] cell adhesion; [GO:0006950] res…	GO:0001650 fibrillar center;GO:0044452 nucleolar part;GO:0015630 microtubule cytoskeleton	GO:0002039 p53 binding;GO:0004674 protein serine/threonine kinase activity;GO:0004672 protein kinase activity	CAMK Ser/Thr protein kinase family	Kinases:CAMK Ser/Thr protein kinases; ENZYME proteins:Transferases; Predicted intracellular proteins; Enzymes	[IPR000719] Protein kinase domain; [IPR008271] Serine/threonine-protein kinase, active site; [IPR011009] Protein kinase-like domain superfamily; [IPR017441] Protein kinase, ATP binding site	Nucleoli fibrillar center (reliability']); Additional: Microtubules;Nucleoplasm					yes			MP:0010768 mortality/aging; MP:0005369 muscle phenotype; MP:0005376 homeostasis/metabolism phenotype; MP:0005384 cellular phenotype; MP:0005378 growth/size/body region phenotype		OMIM ID:608130 Nuak family, snf1-like kinase, 1		Erythrocyte Indices	Attention;Attention Deficit Disorder with Hyperactivity				Fostamatinib	Primary Malignant Liver Neoplasm; Hypocalcemia; Plasmacytoma; Neoplasm Invasiveness; Disseminated Malignant Neoplasm; Tauopathies; Primary cholangiocarcinoma of intrahepatic biliary tract; Pervasive Development Disorder; Intrahepatic Cholangiocarcinoma; Adult Burkitt Lymphoma; Childhood Burkitt Lymphoma; T-Cell Lymphoma; Metastatic melanoma; Burkitt Lymphoma; Malignant Head and Neck Neoplasm; Hea…	37	56	[{"UniProt":"O60285","EnsemblGene":["ENSG00000074590"],"SwissProt":["NUAK1_HUMAN"]},{"UniProt":"A0A024RBL3","RefSeq":[["NM_014840","NP_055655","VALIDATED"]],"SwissProt":["A0A024RBL3_HUMAN"]}]	larynx	Distribution: Detected in many; Specificity: Tissue enhanced
		Adgrd1	283383	ADGRD1	GPR133|PGR25	protein-coding	adhesion G protein-coupled receptor D1	The adhesion G-protein-coupled receptors (GPCRs), including GPR133, are membrane-bound proteins with long N termini containing multiple domains. GPCRs, or GPRs, contain 7 transmembrane domains and transduce extracellular signals through heterotrimeric G proteins (summary by Bjarnadottir et al., 2004 [PubMed 15203201]).[supplied by OMIM, Nov 2010]	chr12:130953907-131141469	GO:0007189 adenylate cyclase-activating G protein-coupled receptor signaling pathway;GO:0019933 cAMP-mediated signaling;GO:0019935 cyclic-nucleotide-mediated signaling	[GO:0007165] signal transduction; [GO:0008150] biological_process; [GO:0005575] cellular_component; [GO:0003674] molecular_function; [GO:0005886] plasma membrane	GO:0005887 integral component of plasma membrane;GO:0031226 intrinsic component of plasma membrane;GO:0044459 plasma membrane part	GO:0004930 G protein-coupled receptor activity;GO:0004888 transmembrane signaling receptor activity;GO:0038023 signaling receptor activity		G-protein coupled receptors:Family 2 (B) receptors; G-protein coupled receptors:GPCRs excl olfactory receptors; Predicted intracellular proteins	[IPR000203] GPS motif; [IPR000832] GPCR, family 2, secretin-like; [IPR001759] Pentraxin-related; [IPR013320] Concanavalin A-like lectin/glucanase domain superfamily; [IPR017981] GPCR, family 2-like; [IPR017983] GPCR, family 2, secretin-like, conserved site	Cytosol;Nucleoplasm (reliability'])			yes	yes			yes	MP:0005389 reproductive system phenotype; MP:0005390 skeleton phenotype		OMIM ID:613639 Adhesion g protein-coupled receptor d1		Calcium;Lymphocyte Count;Platelet Function Tests	Amyotrophic lateral sclerosis 1;Body Height;Depressive Disorder;Electrocardiography;Longevity;Panic Disorder;Serotonin Uptake Inhibitors				Onapristone	AMYOTROPHIC LATERAL SCLEROSIS 6 (disorder); AMYOTROPHIC LATERAL SCLEROSIS 1, AUTOSOMAL RECESSIVE; Longevity; AMYOTROPHIC LATERAL SCLEROSIS 1; Amyotrophic Lateral Sclerosis, Sporadic; Height; Serum HDL cholesterol measurement; High density lipoprotein measurement; Body Height	5	20	[{"UniProt":"Q6QNK2","EnsemblGene":["ENSG00000111452"],"SwissProt":["AGRD1_HUMAN"]},{"UniProt":"Q9NSM3","RefSeq":[["NM_001330497","NP_001317426","REVIEWED"],["NM_198827","NP_942122","REVIEWED"]],"SwissProt":["Q9NSM3_HUMAN"]}]		Distribution: Detected in many; Specificity: Tissue enhanced	antibody: Most normal tissues showed weak to moderate cytoplasmic positivity. Respiratory epithelia, gallbladder, cells in red pulp of spleen and hematopoietic cells showed strong positivity. Liver, parathyroid, renal glomeruli, most cells in CNS and lymph node were negative.; Cytoplasmic expression in most tissues.	Antibody: The majority of cancer tissues showed weak to moderate cytoplasmic staining. A few cases of endometrial, lung and pancreatic cancers showed strong cytoplasmic positivity with distinct extracellular material. Most gliomas, lymphomas and melanomas along with skin cancers were negative.
		Rgcc	28984	RGCC	C13orf15|RGC-32|RGC32|bA157L14.2	protein-coding	regulator of cell cycle	This gene is thought to regulate cell cycle progression. It is induced by p53 in response to DNA damage, or by sublytic levels of complement system proteins that result in activation of the cell cycle. The encoded protein localizes to the cytoplasm during interphase and to centrosomes during mitosis. The protein forms a complex with polo-like kinase 1. The protein also translocates to the nucleus…	chr13:41457411-41470876	GO:0001100 negative regulation of exit from mitosis;GO:0003331 positive regulation of extracellular matrix constituent secretion;GO:1901203 positive regulation of extracellular matrix assembly	[GO:0008150] biological_process; [GO:0007049] cell cycle; [GO:0040011] locomotion; [GO:0048870] cell motility; [GO:0008219] cell death; [GO:0000278] mitotic cell cycle; [GO:0008283] cell population proliferation; [GO:0048856] anatomical structure development; [GO:0048646] anatomical structure formation involved in morphogenesis; [GO:0034641] cellular nitrogen compound metabolic process; [GO:00090…	GO:0005813 centrosome;GO:0005815 microtubule organizing center;GO:0015630 microtubule cytoskeleton	GO:0070412 R-SMAD binding;GO:0046332 SMAD binding;GO:0030295 protein kinase activator activity		Predicted intracellular proteins	[IPR029252] Regulator of cell cycle RGCC	Nucleoplasm (reliability']); Additional: Nucleoli								MP:0005385 cardiovascular system phenotype; MP:0010768 mortality/aging; MP:0005384 cellular phenotype; MP:0005378 growth/size/body region phenotype; MP:0005387 immune system phenotype; MP:0005397 hematopoietic system phenotype; MP:0005380 embryo phenotype		OMIM ID:610077 Regulator of cell cycle		Leukoaraiosis;Potassium;Vitamin B 6	Multiple Sclerosis					Mesangioproliferative glomerulonephritis; Viral Load result; Idiopathic generalized epilepsy; Renal interstitial fibrosis; Muscular Dystrophy, Facioscapulohumeral; ACQUIRED IMMUNODEFICIENCY SYNDROME, PROGRESSION TO; AIDS, PROGRESSION TO; HIV-1, RESISTANCE TO; HUMAN IMMUNODEFICIENCY VIRUS TYPE 1, SUSCEPTIBILITY TO; Multiple Sclerosis, Relapsing-Remitting; Promyelocytic leukemia; Kidney Neoplasm; T…	26	44	[{"UniProt":"Q9H4X1","EnsemblGene":["ENSG00000102760"],"SwissProt":["RGCC_HUMAN"]}]		Distribution: Detected in all; Specificity: Tissue enhanced	Ubiquitous cytoplasmic and membranous expression.; antibody: Normal tissues showed moderate to strong cytoplasmic and membranous staining. Bile duct cells and most cells in the CNS were weakly stained or negative.	Antibody: Malignant tissues showed moderate cytoplasmic and membranous staining. Hepatocellular carcinomas, colorectal cancers along with fractions of cases in ductal breast carcinomas, pancreatic and testicular cancers displayed strong positivity. A majority of renal cancers and several malignant lymphomas were weakly stained or negative.	(M145)PID P53 DOWNSTREAM PATHWAY
		Padi2	11240	PADI2	PAD-H19|PAD2|PDI2	protein-coding	peptidyl arginine deiminase 2	This gene encodes a member of the peptidyl arginine deiminase family of enzymes, which catalyze the post-translational deimination of proteins by converting arginine residues into citrullines in the presence of calcium ions. The family members have distinct substrate specificities and tissue-specific expression patterns. The type II enzyme is the most widely expressed family member. Known substra…	chr1:17119453-17066761	GO:0010848 regulation of chromatin disassembly;GO:0036413 histone H3-R26 citrullination;GO:1901624 negative regulation of lymphocyte chemotaxis	[GO:0005575] cellular_component; [GO:0005737] cytoplasm; [GO:0005622] intracellular; [GO:0003674] molecular_function; [GO:0043167] ion binding; [GO:0016810] hydrolase activity, acting on carbon-nitrogen (but not peptide) bonds; [GO:0008150] biological_process; [GO:0006464] cellular protein modification process; [GO:0043226] organelle; [GO:0005634] nucleus; [GO:0005576] extracellular region; [GO:0…	GO:0035327 transcriptionally active chromatin;GO:0035578 azurophil granule lumen;GO:0005766 primary lysosome	GO:0004668 protein-arginine deiminase activity;GO:0016813 hydrolase activity, acting on carbon-nitrogen (but not peptide) bonds, in linear amidines;GO:0030331 estrogen receptor binding		ENZYME proteins:Hydrolases; Predicted intracellular proteins; Enzymes	[IPR004303] Protein-arginine deiminase; [IPR008972] Cupredoxin; [IPR013530] Protein-arginine deiminase, C-terminal; [IPR013732] Protein-arginine deiminase (PAD) N-terminal; [IPR013733] Protein-arginine deiminase (PAD), central domain; [IPR036556] Protein-arginine deiminase, central domain superfamily; [IPR038685] PAD, N-terminal domain superfamily									MP:0005385 cardiovascular system phenotype; MP:0010768 mortality/aging; MP:0005376 homeostasis/metabolism phenotype; MP:0005378 growth/size/body region phenotype; MP:0005387 immune system phenotype; MP:0005397 hematopoietic system phenotype		OMIM ID:607935 Peptidylarginine deiminase, type ii							Citrulline	Peripheral arterial stenosis; Gingivitis; Spondylarthritis; Arthropathy; Ductal Breast Carcinoma; Monoclonal Gammopathy of Undetermined Significance; Lung Diseases, Interstitial; Peripheral Arterial Diseases; Periodontal Diseases; estrogen receptor-negative breast cancer; Skin Neoplasms; Glaucoma, Primary Open Angle; Progression of prostate cancer; Malignant neoplasm of skin; Oestrogen receptor p…	45	61	[{"UniProt":"Q9Y2J8","EnsemblGene":["ENSG00000117115"],"SwissProt":["PADI2_HUMAN"]}]	blood	Distribution: Detected in many; Specificity: Tissue enhanced	Cytoplasmic expression in several tissues, including skeletal muscle, salivary gland, breast, large intestine and CNS.; antibody: Breast, colon, rectum and a subset of cells in red pulp of spleen showed strong cytoplasmic staining. Hematopoietic cells, fallopian tube and skeletal myocytes exhibited moderate staining. The glial cells displayed strong cytoplasmic and nuclear positivity. Salivary gl…	Antibody: Few cases of melanomas, breast and ovarian cancers showed moderate to strong cytoplasmic staining. Rare cases of gliomas along with neuropil in most gliomas displayed strong positivity. Few cases of colorectal and endometrial cancers displayed moderate immunoreactivity. Remaining cancer tissues were weakly stained or negative.
		Galnt6	11226	GALNT6	GALNAC-T6|GalNAcT6	protein-coding	polypeptide N-acetylgalactosaminyltransferase 6	This gene encodes a member of the UDP-N-acetyl-alpha-D-galactosamine:polypeptide N-acetylgalactosaminyltransferase (GalNAc-T) family of enzymes. GalNAc-Ts initiate mucin-type O-linked glycosylation in the Golgi apparatus by catalyzing the transfer of GalNAc to serine and threonine residues on target proteins. They are characterized by an N-terminal transmembrane domain, a stem region, a lumenal c…	chr12:51391955-51351252	GO:0016266 O-glycan processing;GO:0006493 protein O-linked glycosylation;GO:0006486 protein glycosylation	[GO:0005575] cellular_component; [GO:0005737] cytoplasm; [GO:0005622] intracellular; [GO:0003674] molecular_function; [GO:0043167] ion binding; [GO:0043226] organelle; [GO:0005794] Golgi apparatus; [GO:0016757] transferase activity, transferring glycosyl groups; [GO:0008150] biological_process; [GO:0006464] cellular protein modification process; [GO:0009058] biosynthetic process	GO:0048471 perinuclear region of cytoplasm;GO:0000139 Golgi membrane;GO:0098791 Golgi subcompartment	GO:0004653 polypeptide N-acetylgalactosaminyltransferase activity;GO:0008376 acetylgalactosaminyltransferase activity;GO:0008194 UDP-glycosyltransferase activity		ENZYME proteins:Transferases; Predicted intracellular proteins; Enzymes	[IPR000772] Ricin B, lectin domain; [IPR001173] Glycosyltransferase 2-like; [IPR029044] Nucleotide-diphospho-sugar transferases; [IPR035992] Ricin B-like lectins	Golgi apparatus;Nucleoplasm (reliability'])			yes			principal1	yes			OMIM ID:605148 Udp-n-acetyl-alpha-d-galactosamine:polypeptide n-acetylgalactosaminyltransferase 6		Alcoholism;Child Development Disorders, Pervasive						Cystadenocarcinoma, Serous; High grade serous carcinoma; Carcinoma, Endometrioid; Adenocarcinoma of colon; Noninfiltrating Intraductal Carcinoma; RDW - Red blood cell distribution width result; Red cell distribution width determination; Endometriosis; Epithelial ovarian cancer; Secondary malignant neoplasm of lung; Endometrial Carcinoma; Adenocarcinoma; Adenocarcinoma of lung (disorder); Carcinom…	16	28	[{"UniProt":"Q8NCL4","EnsemblGene":["ENSG00000139629"],"EnsemblTrans":[["ENST00000356317","ENSP00000348668","principal1"],["ENST00000543196","ENSP00000444171","principal1"]],"RefSeq":[["NM_007210","NP_009141","REVIEWED"],["XM_005268607","XP_005268664","MODEL"],["XM_006719214","XP_006719277","MODEL"],["XM_011537819","XP_011536121","MODEL"],["XM_011537822","XP_011536124","MODEL"],["XM_017018744","X…		Distribution: Detected in many; Specificity: Tissue enhanced	Cytoplasmic expression with a granular pattern, mainly in glandular cells of the intestinal tract and epididymis.; antibody: Strong and selective cytoplasmic staining in several glandular epithelia, including gastrointestinal tract. Staining pattern was often a granular Golgi-like pattern.	Antibody: Distinct cytoplasmic staining in breast and colorectal carcinomas. Several other adenocarcinomas were also distinctly stained. Nevertheless prostate and liver cancers, malignant melanomas and gliomas were mostly negative.		(M00056)O-glycan biosynthesis, mucin type core; (hsa)O-glycan biosynthesis, mucin type core; (ko00512)Mucin type O-glycan biosynthesis
[truncated: 2,274 more rows]
