# Supplementary material for: Oncometabolite D-2-hydroxyglutarate - dependent metabolic reprogramming induces skeletal muscle atrophy during cancer cachexia
Source: Research Square preprint supplement (doi:10.21203/rs.3.rs-1246702/v1), 2022-01-27
Supplement: Supplementary file 6 [file 2deafb7b53a9fd540c4cfbbc.xls]

## Sheet: D2HG(1st)
	FC	log2(FC)	raw.pval	#NAME?
NADPH	0.036401	-4.7799	5.3038e-07	6.2754
NAD	0.12868	-2.9582	1.8655e-06	5.7292
Valine	0.22187	-2.1722	7.3514e-05	4.1336
Glutathione	0.33228	-1.5895	0.00048124	3.3176
Alanine	0.37327	-1.4217	8.8798e-06	5.0516
UDP-glucose	0.40561	-1.3018	0.083966	1.0759
Glyoxylate	0.42889	-1.2213	0.0046135	2.336
Keto-glutarate	0.48578	-1.0416	0.0030942	2.5094
Hydroxybutyrate	0.49496	-1.0146	0.00069611	3.1573
Succinate	0.50812	-0.97675	0.00044973	3.347
Glycine	0.50976	-0.9721	0.040128	1.3965
Malate	0.51322	-0.96236	0.0024036	2.6191
Fructose-bisphosphate	0.57892	-0.78857	0.021005	1.6777
Iso-leucine	0.59845	-0.7407	0.024226	1.6157
Threonine	0.60352	-0.72852	0.0075006	2.1249
Leucine	0.62024	-0.6891	0.014801	1.8297
ADP-ribose	0.63383	-0.65783	0.18859	0.72448
Acetoacetate	0.63487	-0.65547	0.010915	1.962
Fumarate	0.65813	-0.60356	0.0096519	2.0154
Glutamine	0.66611	-0.58616	0.018386	1.7355
Ornithine	1.6311	0.70582	0.16167	0.79138
Citrate	2.0616	1.0437	0.0029311	2.533
Tryptophan	2.1946	1.134	0.00030033	3.5224
Taurine	2.2607	1.1768	0.0025269	2.5974
Phenylalanine	2.2902	1.1955	0.00021031	3.6771
Proline	2.3089	1.2072	9.0697e-05	4.0424
Acetyl-Carnitine	2.3801	1.251	0.0063794	2.1952
Isocitrate	2.4206	1.2754	0.022098	1.6557
Choline	2.7909	1.4807	0.00049133	3.3086
Myo-Inositol	3.0712	1.6188	9.7843e-05	4.0095
NADH	4.0172	2.0062	3.3427e-05	4.4759
NADP	4.3865	2.1331	1.0813e-06	5.9661
Tryptamine	4.6911	2.2299	2.0262e-06	5.6933
Lactate	4.835	2.2735	0.062453	1.2044
3-Methylhistidine	5.622	2.4911	1.9572e-07	6.7084
2-Hydroxyglutarate	9.1811	3.1987	0.00039521	3.4032
Carnitine	9.34	3.2234	1.2363e-07	6.9079

## Sheet: D2HG(2nd)
	FC	log2(FC)	raw.pval	#NAME?
NADPH	0.1395	-2.8417	0.00011122	3.9538
Glutathione	0.21388	-2.2251	1.1304e-07	6.9468
NAD	0.21649	-2.2076	0.00011034	3.9573
Glycerol-phosphate	0.23091	-2.1146	1.0745e-05	4.9688
Keto-glutarate	0.39618	-1.3358	3.6092e-06	5.4426
Glyoxylate	0.47282	-1.0806	7.0359e-06	5.1527
Valine	0.47522	-1.0733	0.03651	1.4376
Glutamate	0.48641	-1.0397	0.00047847	3.3201
Hydroxybutyrate	0.49482	-1.015	0.0034196	2.466
Oxalosuccinate	0.51785	-0.9494	0.0017596	2.7546
Inosine	0.52732	-0.92325	0.0015442	2.8113
Threonine	0.55948	-0.83784	0.0010966	2.9599
Leucine	0.57057	-0.80953	0.0076158	2.1183
Succinate	0.57989	-0.78615	0.0029971	2.5233
Sn-Glycero-3-Phosphocholine	0.59302	-0.75384	5.6533e-05	4.2477
Alanine	0.66311	-0.59269	0.071177	1.1477
Acetoacetate	0.77727	-0.36352	0.039583	1.4025
Oxalactate	1.2157	0.28184	0.00028581	3.5439
Fumarate	1.4235	0.50948	3.8553e-05	4.4139
Aconinate	1.5949	0.67342	3.3486e-05	4.4751
Lactate	1.6538	0.72578	3.1623e-05	4.5
Ornithine	1.7155	0.7786	0.0018541	2.7319
Citrate	1.969	0.97747	0.0075141	2.1241
Isocitrate	1.9966	0.99756	4.4499e-05	4.3516
Taurine	2.1919	1.1322	0.0020375	2.6909
Phenylalanine	2.2381	1.1623	0.00027089	3.5672
Acetyl-Carnitine	2.3885	1.2561	0.028009	1.5527
Choline	2.6738	1.4189	0.0057363	2.2414
NADH	2.7526	1.4608	0.00016093	3.7934
Cysteine	2.8748	1.5235	0.0022008	2.6574
Myo-Inositol	2.944	1.5578	0.0011522	2.9385
NADP	4.1588	2.0562	4.418e-06	5.3548
Carnitine	4.4921	2.1674	2.0548e-05	4.6872
Tryptamine	4.8856	2.2885	1.6081e-05	4.7937
2-Hydroxyglutarate	5.1232	2.357	2.0045e-06	5.698
3-Methylhistidine	5.2694	2.3976	5.9488e-08	7.2256

## Sheet: venn_result11536 D2HG metabolit
Names	total	elements
Depleted metabolites of D2HG Enriched metabolites of D2HG(2nd)	1	Fumarate
Depleted metabolites of D2HG Depleted metabolites of D2HG(2nd)	12	Alanine
		NADPH
		NAD
		Succinate
		Acetoacetate
		Threonine
		Keto-glutarate
		Glutathione
		Hydroxybutyrate
		Valine
		Leucine
		Glyoxylate
Enriched metabolites of D2HG Enriched metabolites of D2HG(2nd)	15	Isocitrate
		NADP
		Citrate
		Myo-Inositol
		2-Hydroxyglutarate
		Ornithine
		Carnitine
		3-Methylhistidine
		Choline
		Acetyl-Carnitine
		Lactate
		Phenylalanine
		Tryptamine
		Taurine
		NADH
Depleted metabolites of D2HG	7	Glycine
		ADP-ribose
		Glutamine
		Fructose-bisphosphate
		Malate
		UDP-glucose
		Iso-leucine
Enriched metabolites of D2HG	2	Proline
		Tryptophan
Enriched metabolites of D2HG(2nd)	3	Aconinate
		Cysteine
		Oxalactate
Depleted metabolites of D2HG(2nd)	5	Glutamate
		Glycerol-phosphate
		Oxalosuccinate
		Sn-Glycero-3-Phosphocholine
		Inosine
