# Supplementary material for: Oncometabolite D-2-hydroxyglutarate - dependent metabolic reprogramming induces skeletal muscle atrophy during cancer cachexia
Source: Research Square preprint supplement (doi:10.21203/rs.3.rs-1246702/v1), 2022-01-27
Supplement: Supplementary file 7 [file 512c3bb45c12a3dcab8dcc39.xls]

## Sheet: Cachexicalmetabolites
Metabolites	HMDB	PubChem	KEGG	SMILES	Chemical Formula	Average Molecular Weight	Description
1,2,3-Trihydroxybenzene	HMDB0013674	3446	C01108	C1=CC(=C(C(=C1)O)O)O	C6H6O3	126.11	1,2,3-Trihydroxybenzene, also known as pyrogallic acid or 1,2,3-benzenetriol, belongs to the class of organic compounds known as 5-unsubstituted pyrrogallols. These are pyrrogallols that are unsubstituted at th5-position of the benzene ring. 1,2,3-Trihydroxybenzene is an extremely weak basic (essentially neutral) compound (based on its pKa). It is a white, water-soluble solid although samples are…
1,5-Anhydrosorbitol	HMDB0002712	64960	C07326	C1[C@@H]([C@H]([C@@H]([C@H](O1)CO)O)O)O	C6H12O5	164.156	1,5-Anhydrosorbitol or 1,5-anhydroglucitol (1,5-AG) is a validated marker of short-term glycemic control. This substance is derived mainly from food, is well absorbed in the intestine, and is distributed to all organs and tissues. It is metabolically stable, being excreted in the urine when its level exceeds the renal threshold. It is reabsorbed in the renal tubules and is competitively inhibited…
1-Hexadecanol	HMDB0003424	2682	C00823	CCCCCCCCCCCCCCCCO	C16H34O	242.441	Cetyl alcohol, also known as 1-hexadecanol and palmityl alcohol, is a solid organic compound and a member of the alcohol class of compounds. Its chemical formula is CH3(CH2)15OH. At room temperature, cetyl alcohol takes the form of a waxy white solid or flakes. It belongs to the group of fatty alcohols. With the demise of commercial whaling, cetyl alcohol is no longer primarily produced from whal…
1-Methylhistidine	HMDB0000001	92105	C01152	CN1C=C(N=C1)C[C@@H](C(=O)O)N	C7H11N3O2	169.181	1-Methylhistidine, also known as 1-MHis, belongs to the class of organic compounds known as histidine and derivatives. Histidine and derivatives are compounds containing cysteine or a derivative thereof resulting from a reaction of cysteine at the amino group or the carboxy group, or from the replacement of any hydrogen of glycine by a heteroatom. 1-Methylhistidine is derived mainly from the anse…
1-Methylnicotinamide	HMDB0000699	457	C02918	C[N+]1=CC=CC(=C1)C(=O)N	C7H9N2O	137.159	1-Methylnicotinamide, also known as trigonellinamide or trigonellamide chloride, belongs to the class of organic compounds known as nicotinamides. These are heterocyclic aromatic compounds containing a pyridine ring substituted at position 3 by a carboxamide group. 1-Methylnicotinamide is a drug. 1-Methylnicotinamide is an extremely weak basic (essentially neutral) compound (based on its pKa). 1-…
2,3-Diphosphoglyceric acid	HMDB0001294	186004	C01159	C([C@H](C(=O)O)OP(=O)(O)O)OP(=O)(O)O	C3H8O10P2	266.037	2,3-Bisphosphoglycerate (CAS: 138-81-8), also known as 2,3-BPG or 2,3-diphosphoglycerate, is a three-carbon isomer of the glycolytic intermediate 1,3-bisphosphoglycerate and is present at high levels in the human red blood cell (RBC; erythrocyte) at the same molar concentration as hemoglobin. It is notable because it binds to deoxygenated hemoglobin in RBCs. In doing so, it allosterically upregul…
2-Aminoheptanedioic acid	HMDB0034252	101122	NA	C(CCC(=O)O)CC(C(=O)O)N	C7H13NO4	175.182	2-Aminoheptanedioic acid, also known as alpha-aminopimelic acid or a-aminopimelate, belongs to the class of organic compounds known as alpha amino acids. These are amino acids in which the amino group is attached to the carbon atom immediately adjacent to the carboxylate group (alpha carbon). 2-Aminoheptanedioic acid is a very strong basic compound (based on its pKa). Outside of the human body, 2…
2-Hydroxybutyric acid	HMDB0000008	11266	C05984	CCC(C(=O)O)O	C4H8O3	104.105	2-Hydroxybutyric acid (CAS: 600-15-7), also known as alpha-hydroxybutyrate, is an organic acid derived from alpha-ketobutyrate. alpha-Ketobutyrate is produced by amino acid catabolism (threonine and methionine) and glutathione anabolism (cysteine formation pathway) and is metabolized into propionyl-CoA and carbon dioxide (PMID: 20526369 ). 2-Hydroxybutyric acid is formed as a byproduct from the f…
2-Hydroxyglutarate	HMDB0059655	43	C02630		C5H8O5	148.114	2-Hydroxyglutarate exists in 2 isomers: L-2-hydroxyglutarate acid and D-2-hydroxyglutarate. Both the D and the L stereoisomers of hydroxyglutaric acid (EC 1.1.99.2) are found in body fluids. In humans it is part of butanoate metabolic pathway and can be produced by phosphoglycerate dehydrogenase (PHGDH). More specifically, the enzyme PHGDH catalyzes the NADH-dependent reduction of ?-ketoglutarate…
D-2-Hydroxyglutaric acid	HMDB0000606	439391	C01087		C5H8O5	148.114	In humans, D-2-hydroxyglutaric acid is formed by a hydroxyacid-oxoacid transhydrogenase whereas in bacteria it is formed by a 2-hydroxyglutarate synthase. D-2-Hydroxyglutaric acid is also formed via the normal activity of hydroxyacid-oxoacid transhydrogenase during conversion of 4-hydroxybutyrate to succinate semialdehyde. The compound can be converted to alpha-ketoglutaric acid through the actio…
2-Hydroxypyridine	HMDB0013751	8871	C02502	C1=CC(=O)NC=C1	C5H5NO	95.0993	This colourless crystalline solid is used in peptide synthesis. It is well known to form hydrogen bonded structures somewhat related to the base-pairing mechanism found in RNA and DNA. It is also a classic case of a molecule that exists as tautomers. Some publications only focus one of the two possible patterns, and neglect the influence of the other. For example, to calculation of the energy dif…
2-Isopropylmalic acid	HMDB0000402	5280523	C02504	CC(C)[C@@](CC(=O)O)(C(=O)O)O	C7H12O5	176.167	2-Isopropylmalic acid (CAS: 3237-44-3), also known as 3-carboxy-3-hydroxyisocaproic acid, belongs to the class of organic compounds known as hydroxy fatty acids. These are fatty acids in which the chain bears a hydroxyl group. 2-Isopropylmalic acid is a very hydrophobic molecule, practically insoluble (in water), and relatively neutral. 2-Isopropylmalic acid is an alpha-hydroxy organic acid regul…
2-Methyl-1-propylamine	HMDB0034198	6558	C02787	CC(C)CN	C4H11N	73.1368	2-Methyl-1-propylamine, also known as isobutylamine or valamine, belongs to the class of organic compounds known as monoalkylamines. These are organic compounds containing an primary aliphatic amine group. 2-Methyl-1-propylamine is a very strong basic compound (based on its pKa). 2-Methyl-1-propylamine exists in all living organisms, ranging from bacteria to humans. 2-Methyl-1-propylamine is a ch…
3-Hydroxybutyric acid	HMDB0000357	441	C01089	CC(CC(=O)O)O	C4H8O3	104.105	3-Hydroxybutyric acid (CAS: 300-85-6), also known as beta-hydroxybutanoic acid, is a typical partial-degradation product of branched-chain amino acids (primarily valine) released from muscle for hepatic and renal gluconeogenesis. This acid is metabolized by 3-hydroxybutyrate dehydrogenase (catalyzes the oxidation of 3-hydroxybutyrate to form acetoacetate, using NAD+ as an electron acceptor). The …
3-Hydroxyisovaleric acid	HMDB0000754	69362	C20827	CC(C)(CC(=O)O)O	C5H10O3	118.131	3-Hydroxyisovaleric acid is a normal human metabolite excreted in the urine. It is a byproduct of the leucine degradation pathway. Production of 3-hydroxyisovaleric acid begins with the conversion of 3-methylcrotonyl-CoA into 3-methylglutaconyl-CoA in the mitochondria by the biotin-dependent enzyme methylcrotonyl-CoA carboxylase. Biotin deficiencies, certain lifestyle habits (smoking), or specifi…
3-Methyl-2-oxovaleric acid	HMDB0000491	47	C03465	CCC(C)C(=O)C(=O)O	C6H10O3	130.142	3-Methyl-2-oxovaleric acid is an abnormal metabolite that arises from the incomplete breakdown of branched-chain amino acids. 3-Methyl-2-oxovaleric acid is a neurotoxin, an acidogen, and a metabotoxin. A neurotoxin causes damage to nerve cells and nerve tissues. An acidogen is an acidic compound that induces acidosis, which has multiple adverse effects on many organ systems. A metabotoxin is an e…
3-Methylhistidine	HMDB0000479	64969	C01152	CN1C=NC=C1C[C@@H](C(=O)O)N	C7H11N3O2	169.181	3-Methylhistidine belongs to the class of organic compounds known as histidine and derivatives. Histidine and derivatives are compounds containing cysteine or a derivative thereof resulting from reaction of cysteine at the amino group or the carboxy group, or from the replacement of any hydrogen of glycine by a heteroatom. It is also a biomarker for the consumption of soy products. 3-Methylhistid…
4-Hydroxybenzoic acid	HMDB0000500	135	C00156	C1=CC(=CC=C1C(=O)O)O	C7H6O3	138.122	4-Hydroxybenzoic acid, also known as p-hydroxybenzoate or 4-carboxyphenol, belongs to the class of organic compounds known as hydroxybenzoic acid derivatives. Hydroxybenzoic acid derivatives are compounds containing a hydroxybenzoic acid (or a derivative), which is a benzene ring bearing a carboxyl and a hydroxyl groups. 4-Hydroxybenzoic acid is a drug. 4-Hydroxybenzoic acid is an extremely weak …
4-Hydroxyproline	HMDB0000725	5810	C01157	C1[C@H](CN[C@@H]1C(=O)O)O	C5H9NO3	131.13	4-Hydroxyproline (hydroxyproline or Hyp) is a major component of the protein collagen. Hydroxyproline is produced by hydroxylation of the amino acid proline and is, therefore, a post-translationally modified, non-essential amino acid. Hydroxyproline and proline play key roles in collagen stability. In particular, they permit the sharp twisting of the collagen helix. Hydroxyproline is found in few…
5-Hydroxyindoleacetic acid	HMDB0000763	1826	C05635	C1=CC2=C(C=C1O)C(=CN2)CC(=O)O	C10H9NO3	191.183	5-Hydroxyindoleacetic acid, also known as 5-hydroxyindole-3-acetate or 5-HIAA, belongs to the class of organic compounds known as indole-3-acetic acid derivatives. Indole-3-acetic acid derivatives are compounds containing an acetic acid (or a derivative) linked to the C3 carbon atom of an indole. 5-Hydroxyindoleacetic acid is an extremely weak basic (essentially neutral) compound (based on its pK…
5-Hydroxylysine	HMDB0000450	4433	C16741	C(C[C@@H](C(=O)O)N)[C@H](CN)O	C6H14N2O3	162.187	5-Hydroxylysine, also known as lysine, 5 hydroxy, belongs to the class of organic compounds known as l-alpha-amino acids. These are alpha amino acids which have the L-configuration of the alpha-carbon atom. 5-Hydroxylysine is a very strong basic compound (based on its pKa). 5-Hydroxylysine is a hydroxylated derivative of the amino acid lysine that is present in certain collagens. 5-Hydroxylysine …
6-Hydroxynicotinic acid	HMDB0002658	72924	C01020	C1=CC(=O)NC=C1C(=O)O	C6H5NO3	139.109	6-Hydroxynicotinic acid (6-OHNA) is exploited in the use of NMR spectroscopy or gas chromatography--mass spectrometry for the diagnosis of Pseudomonas aeruginosa in urinary tract infection. Among the common bacteria causing urinary infection, only P. aeruginosa produces 6-hydroxynicotinic acid from nicotinic acid. Pseudomonas aeruginosa infection has been reported to be the third leading cause of…
Acetic acid	HMDB0000042	176	C00033	CC(=O)O	C2H4O2	60.052	Acetic acid is one of the simplest carboxylic acids. It is an important chemical reagent and industrial chemical that is used in the production of plastic soft drink bottles, photographic film; and polyvinyl acetate for wood glue, as well as many synthetic fibres and fabrics. In households diluted acetic acid is often used as a cleaning agent. In the food industry acetic acid is used as an acidit…
Acetoacetic acid	HMDB0000060	96	C00164	CC(=O)CC(=O)O	C4H6O3	102.089	Acetoacetic acid (AcAc) is a weak organic acid that can be produced in the human liver under certain conditions of poor metabolism leading to excessive fatty acid breakdown (diabetes mellitus leading to diabetic ketoacidosis). It is then partially converted into acetone by decarboxylation and excreted either in urine or through respiration. Persistent mild hyperketonemia is a common finding in ne…
Acetohydroxamic Acid	HMDB0014691	1990	C06808	CC(=O)NO	C2H5NO2	75.0666	Acetohydroxamic Acid, also known as acethydroxamsaeure or lithostat, belongs to the class of organic compounds known as acetohydroxamic acids. These are organic compounds that contain a hydroxamic acid group carrying a methyl group attached to its carbon center. Acetohydroxamic Acid is a drug which is used, in addition to antibiotics or medical procedures, to treat chronic urea-splitting urinary …
Acetone	HMDB0001659	180	C00207	CC(=O)C	C3H6O	58.0791	Acetone is one of the ketone bodies produced during ketoacidosis. Acetone is not regarded as a waste product of metabolism. However, its physiological role in biochemical machinery is not clear. A model for the role of acetone metabolism is presented that orders the events occurring in acetonemia in sequence: in diabetic ketosis or starvation, ketone body production (b-hydroxy-butyrate, acetoacet…
Acetylcysteine	HMDB0001890	12035	C06809	CC(=O)N[C@@H](CS)C(=O)O	C5H9NO3S	163.195	Acetylcysteine is the N-acetyl derivative of the amino acid L-cysteine, and is a precursor in the formation of the antioxidant glutathione in the body. The thiol (sulfhydryl) group confers antioxidant effects and is able to reduce free radicals. wikipedia. It is used as a mucolytic agent to reduce the viscosity of mucous secretions. It has also been shown to have antiviral effects in patients wit…
Adipic acid	HMDB0000448	196	C06104	C(CCC(=O)O)CC(=O)O	C6H10O4	146.141	Adipic acid is an important inudstrial dicarboxylic acid with about 2.5 billion kilograms produced per year. It is used mainly in the production of nylon. It occurs relatively rarely in nature. It has a tart taste and is also used as an additive and gelling agent in jello or gelatins. It is also used in some calcium carbonate antacids to make them tart. Adipic acid has also been incorporated into…
Allantoin	HMDB0000462	204	C01551	C1(C(=O)NC(=O)N1)NC(=O)N	C4H6N4O3	158.115	Allantoin is a diureide of glyoxylic acid with the chemical formula C4H6N4O3. It is also called 5-ureidohydantoin or glyoxyldiureide. It is a product of the oxidation of uric acid. It is also a product of purine metabolism in most mammals except for higher apes, and it is present in their urine. In humans, uric acid is excreted instead of allantoin. The presence of allantoin in the urine can be a…
Alpha-Hydroxyisobutyric acid	HMDB0000729	11671	NA	CC(C)(C(=O)O)O	C4H8O3	104.105	alpha-Hydroxyisobutyric acid is a metabolite of methyl tert-butyl ether (MTBE). MTBE may be obtained through environmental exposure. MTBE is rapidly eliminated from the body, mainly through expired air as the unchanged compound. MTBE is to some extent metabolized to t-butyl alcohol (TBA) and formaldehyde and oxidized to 2-methyl-1,2-propanediol and alpha-hydroxyisobutyric acid. alpha-Hydroxyisobu…
Alpha-ketoisovaleric acid	HMDB0000019	49	C00141	CC(C)C(=O)C(=O)O	C5H8O3	116.115	alpha-Ketoisovaleric acid is an abnormal metabolite that arises from the incomplete breakdown of branched-chain amino acids. alpha-Ketoisovaleric acid is a neurotoxin, an acidogen, and a metabotoxin. A neurotoxin causes damage to nerve cells and nerve tissues. An acidogen is an acidic compound that induces acidosis, which has multiple adverse effects on many organ systems. A metabotoxin is an end…
Anserine	HMDB0000194	112072	C01262	CN1C=NC=C1C[C@@H](C(=O)O)NC(=O)CCN	C10H16N4O3	240.259	This dipeptide is normally absent from human tissues and body fluids, and its appearance there is an artifact of diet (Proc Soc Pediatr Res 134, 1967.) and serum carnosinase deficiency. (OMIM 212200 ) Anserine is present in the skeletal muscle of birds and certain species of mammals, notably the rabbit, rat, and whale, contains anserine. (Proc Soc Pediatr Res 134, 1967) The methyl group of anseri…
Aspirin	HMDB0001879	2244	C01405	CC(=O)OC1=CC=CC=C1C(=O)O	C9H8O4	180.157	Aspirin is only found in individuals who have consumed this drug. Aspirin or acetylsalicylic acid (acetosal) is a drug in the family of salicylates, often used as an analgesic (against minor pains and aches), antipyretic (against fever), and anti-inflammatory. It has also an anticoagulant effect and is used in long-term low-doses to prevent heart attacks and cancer. It was isolated from meadowswe…
Beta-Alanine	HMDB0000056	239	C00099	C(CN)C(=O)O	C3H7NO2	89.0932	beta-Alanine is the only naturally occurring beta-amino acid - an amino acid in which the amino group is at the beta-position from the carboxylate group. It is formed in vivo by the degradation of dihydrouracil and carnosine. It is a component of the naturally occurring peptides carnosine and anserine and also of pantothenic acid (vitamin B-5), which itself is a component of coenzyme A. Under nor…
Beta-Glycerophosphoric acid	HMDB0002520	2526	C02979	C(C(CO)OP(=O)(O)O)O	C3H9O6P	172.074	beta-Glycerophosphoric acid, also known as BGA or glycerol 2-phosphate, is a component of glycerolipid metabolism. It is formed in minor quanitites because the alpha glycerophosphorate is preferentially formed in this manner. beta-Glycerophosphoric acid is used as a biological buffer (Sigma-Aldrich).
Betaine	HMDB0000043	247	C00719	C[N+](C)(C)CC(=O)[O-]	C5H11NO2	117.146	Betaine (or N,N,N-trimethylglycine) was named after its discovery in sugar beet (Beta vulgaris) in the 19th century. It is a small N-trimethylated amino acid, existing in zwitterionic form at neutral pH. It is now often called glycine betaine to distinguish it from other betaines that are widely distributed in microorganisms, plants, and animals. Many naturally occurring betaines serve as organic…
Biotin	HMDB0000030	171548	C00120	C1[C@H]2[C@@H]([C@@H](S1)CCCCC(=O)O)NC(=O)N2	C10H16N2O3S	244.311	Biotin is an enzyme co-factor present in minute amounts in every living cell. Biotin is also known as coenzyme R and vitamin H or B7. It occurs mainly bound to proteins or polypeptides and is abundant in liver, kidney, pancreas, yeast, and milk. Biotin has been recognized as an essential nutrient. Humans fulfill their biotin requirement through their diet through endogenous reutilization of bioti…
Caprylic acid	HMDB0000482	379	C06423	CCCCCCCC(=O)O	C8H16O2	144.211	Caprylic acid is the common name for the eight-carbon straight-chain fatty acid known by the systematic name octanoic acid. It is found naturally in coconuts and breast milk. It is an oily liquid with a slightly unpleasant rancid taste that is minimally soluble in water. Caprylic acid is used commercially in the production of esters used in perfumery and also in the manufacture of dyes (Wikipedia…
Carnosine	HMDB0000033	439224	C00386	C1=C(NC=N1)C[C@@H](C(=O)O)NC(=O)CCN	C9H14N4O3	226.232	Carnosine (beta-alanyl-L-histidine) is found exclusively in animal tissues. It is a dipeptide of the amino acids beta-alanine and histidine. Carnosine has the potential to suppress many of the biochemical changes that accompany ageing (e.g. protein oxidation, glycation, AGE formation, and cross-linking) and associated pathologies (PMID: 16804013 ). It is highly concentrated in muscle and brain ti…
Choline	HMDB0000097	305	C00114	C[N+](C)(C)CCO	C5H14NO	104.171	Choline is a basic constituent of lecithin that is found in many plants and animal organs. It is important as a precursor of acetylcholine, as a methyl donor in various metabolic processes, and in lipid metabolism. Choline is now considered to be an essential vitamin. While humans can synthesize small amounts (by converting phosphatidylethanolamine to phosphatidylcholine), it must be consumed in …
cis-Aconitic acid	HMDB0000072	643757	C00417	C(/C(=C/C(=O)O)/C(=O)O)C(=O)O	C6H6O6	174.108	cis-Aconitic acid, also known as cis-aconitate or acid, acontic, belongs to the class of organic compounds known as tricarboxylic acids and derivatives. These are carboxylic acids containing exactly three carboxyl groups. cis-Aconitic acid is a moderately acidic compound (based on its pKa). cis-Aconitic acid exists in all living species, ranging from bacteria to humans. Within humans, cis-aconiti…
Citric acid	HMDB0000094	311	C00158	C(C(=O)O)C(CC(=O)O)(C(=O)O)O	C6H8O7	192.124	Citric acid (citrate) is a weak acid that is formed in the tricarboxylic acid cycle or that may be introduced with diet. The evaluation of plasma citric acid is scarcely used in the diagnosis of human diseases. On the contrary urinary citrate excretion is a common tool in the differential diagnosis of kidney stones, renal tubular acidosis and it plays also a role in bone diseases. The importance …
Citrulline	HMDB0000904	9750	C00327	C(C[C@@H](C(=O)O)N)CNC(=O)N	C6H13N3O3	175.186	Citrulline, also known as Cit or δ-ureidonorvaline, belongs to the class of organic compounds known as l-alpha-amino acids. These are alpha amino acids which have the L-configuration of the alpha-carbon atom. Citrulline is a drug. Citrulline is a very strong basic compound (based on its pKa). Citrulline exists in all living species, ranging from bacteria to humans. Within humans, citrulline parti…
Creatine	HMDB0000064	586	C00300	CN(CC(=O)O)C(=N)N	C4H9N3O2	131.133	Creatine, also known as cosmocair C 100 or krebiozon, belongs to the class of organic compounds known as alpha amino acids and derivatives. These are amino acids in which the amino group is attached to the carbon atom immediately adjacent to the carboxylate group (alpha carbon), or a derivative thereof. Creatine is a drug. Creatine is a very strong basic compound (based on its pKa). Creatine exis…
Creatinine	HMDB0000562	588	C00791	CN1CC(=O)N=C1N	C4H7N3O	113.118	Creatinine, or creatine anhydride, is a breakdown product of creatine phosphate in muscle. The loss of a water molecule from creatine results in the formation of creatinine. Creatinine is transferred to the kidneys by blood plasma, whereupon it is eliminated from the body by glomerular filtration and partial tubular excretion. Creatinine is usually produced at a fairly constant rate by the body. …
Cysteic acid	HMDB0002757	25701	C00506	C(C(C(=O)O)N)S(=O)(=O)O	C3H7NO5S	169.156	Cysteic acid, also known as cysteate or 3-sulfoalanine, belongs to the class of organic compounds known as alpha amino acids. These are amino acids in which the amino group is attached to the carbon atom immediately adjacent to the carboxylate group (alpha carbon). Cysteic acid is a very strong basic compound (based on its pKa). Cysteic acid exists in all living species, ranging from bacteria to …
Cysteinyl-Cysteine	HMDB0028772	15607039	NA	NC(CS)C(=O)NC(CS)C(O)=O	C6H12N2O3S2	224.301	Cysteinyl-Cysteine is a dipeptied compoosed of two cysteine residues. It is an incomplete breakdown product of protein digestion or protein catabolism. Some dipeptides are known to have physiological or cell-signaling effects although most are simply short-lived intermediates on their way to specific amino acid degradation pathways following further proteolysis. This dipeptide has not yet been id…
D-Arabitol	HMDB0000568	827	C01904	C(C(C(C(CO)O)O)O)O	C5H12O5	152.146	D-Arabitol is a polyol. Polyols are sugar alcohols linked to the pentose phosphate pathway (PPP). They are classified on the basis of the number of carbon atoms. Polyols occur in body fluids. A patient with leukoencephalopathy and peripheral neuropathy has been identified as suffering from ribose-5-phosphate isomerase (RPI) deficiency, a defect in the PPP. In this disorder, highly elevated concen…
Deoxyuridine	HMDB0000012	13712	C00526	C1[C@@H]([C@H](O[C@H]1N2C=CC(=O)NC2=O)CO)O	C9H12N2O5	228.202	Deoxyuridine, also known as dU, belongs to the class of organic compounds known as pyrimidine 2'-deoxyribonucleosides. Pyrimidine 2'-deoxyribonucleosides are compounds consisting of a pyrimidine linked to a ribose which lacks a hydroxyl group at position 2. It is similar in chemical structure to uridine, but without the 2'-hydroxyl group. Deoxyuridine exists in all living organisms, ranging from …
Dethiobiotin	HMDB0003581	445027	C01909	C[C@H]1[C@H](NC(=O)N1)CCCCCC(=O)O	C10H18N2O3	264.262	Dethiobiotin is a synthetic metabolite that mimic the effects of biotin on gene expression and thus have biotin-like activities. In mammals, biotin serves as a coenzyme for carboxylases such as propionyl-CoA carboxylase. (PMID 12730407 ).
D-Fructose	HMDB0000660	439709	C02336	C([C@@H]1[C@H]([C@@H]([C@](O1)(CO)O)O)O)O	C6H12O6	180.156	Fructose, or levulose, is a levorotatory monosaccharide and an isomer of glucose (C6H12O6). The chemical composition of fructose is (C6H12O6). Pure fructose has a sweet taste similar to cane sugar, but with a "fruity" aroma. Although fructose is a hexose (6-carbon sugar), it generally exists as a 5-member hemiketal ring (a furanose). This structure is responsible for the long metabolic pathway an…
D-Glucose	HMDB0000122	5793	C00031	C([C@@H]1[C@H]([C@@H]([C@H](C(O1)O)O)O)O)O	C6H12O6	180.156	Glucose (CAS: 50-99-7) is a monosaccharide containing six carbon atoms and an aldehyde group and is therefore referred to as an aldohexose. The glucose molecule can exist in an open-chain (acyclic) and ring (cyclic) form, the latter being the result of an intramolecular reaction between the aldehyde C atom and the C-5 hydroxyl group to form an intramolecular hemiacetal. In aqueous solution, both …
D-Glucuronic acid	HMDB0000127	94715	C00191	[C@@H]1([C@@H]([C@H](O[C@@H]([C@@H]1O)O)C(=O)O)O)O	C6H10O7	194.139	Glucuronic acid is a carboxylic acid that has the structure of a glucose molecule that has had its sixth carbon atom (of six total) oxidized. The salts of glucuronic acid are known as glucuronates. Glucuronic acid is highly soluble in water. In humans, glucuronic acid is often linked to toxic or poisonous substances to allow for subsequent elimination, and to hormones to allow for easier transpor…
Dimethylamine	HMDB0000087	674	C00543	CNC	C2H7N	45.0837	Dimethylamine (DMA) is an organic secondary amine. It is a colorless, liquefied and flammable gas with an ammonia and fish-like odor. Dimethylamine is abundantly present in human urine. Main sources of urinary DMA have been reported to include trimethylamine N-oxide, a common food component, and asymmetric dimethylarginine (ADMA), an endogenous inhibitor of nitric oxide (NO) synthesis. ADMA is ex…
Dimethylbenzimidazole	HMDB0003701	675	C03114	CC1=CC2=C(C=C1C)N=CN2	C9H10N2	146.189	Dimethylbenzimidazole, also known as dimedazol, belongs to the class of organic compounds known as benzimidazoles. These are organic compounds containing a benzene ring fused to an imidazole ring (five member ring containing a nitrogen atom, 4 carbon atoms, and two double bonds). Dimethylbenzimidazole is a very strong basic compound (based on its pKa). Dimethylbenzimidazole exists in all living o…
Dimethylglycine	HMDB0000092	673	C01026	CN(C)CC(=O)O	C4H9NO2	103.12	Dimethylglycine (DMG) is an amino acid derivative found in the cells of all plants and animals and can be obtained in the diet in small amounts from grains and meat. The human body produces DMG when metabolizing choline into glycine. Dimethylglycine that is not metabolized in the liver is transported by the circulatory system to body tissue. Dimethylglycine was popular with Russian athletes and c…
DL-Dopa	HMDB0000609	836	C00355	C1=CC(=C(C=C1CC(C(=O)O)N)O)O	C9H11NO4	197.188	DL-Dopa, also known as (+-)-dopa or (R,S)-dopa, belongs to the class of organic compounds known as tyrosine and derivatives. Tyrosine and derivatives are compounds containing tyrosine or a derivative thereof resulting from reaction of tyrosine at the amino group or the carboxy group, or from the replacement of any hydrogen of glycine by a heteroatom. DL-Dopa is a very strong basic compound (based…
D-Mannose	HMDB0000169	18950	C00159	C([C@@H]1[C@H]([C@@H]([C@@H](C(O1)O)O)O)O)O	C6H12O6	180.156	D-Mannose (CAS: 3458-28-4) is a carbohydrate. High-mannose-type oligosaccharides have been shown to play important roles in protein quality control. Several intracellular proteins such as lectins, chaperones, and glycan-processing enzymes, are involved in this process. These include calnexin/calreticulin, UDP-glucose:glycoprotein glucosyltransferase (UGGT), cargo receptors (such as VIP36 and ERGI…
Dodecanoic acid	HMDB0000638	3893	C02679	CCCCCCCCCCCC(=O)O	C12H24O2	200.318	Dodecanoic acid, also known as dodecanoate or lauric acid, belongs to the class of organic compounds known as medium-chain fatty acids. These are fatty acids with an aliphatic tail that contains between 4 and 12 carbon atoms. Dodecanoic acid is a very hydrophobic molecule, practically insoluble (in water), and relatively neutral. Dodecanoic acid is the main fatty acid in coconut oil and in palm k…
Dopamine	HMDB0000073	681	C03758	C1=CC(=C(C=C1CCN)O)O	C8H11NO2	153.178	Dopamine is a member of the catecholamine family of neurotransmitters in the brain and is a precursor to epinephrine (adrenaline) and norepinephrine (noradrenaline). Dopamine is synthesized in the body (mainly by nervous tissue and adrenal glands) first by the hydration of the amino acid tyrosine to DOPA by tyrosine hydroxylase and then by the decarboxylation of DOPA by aromatic-L-amino-acid deca…
D-Tagatose	HMDB0003418	92092	C02336	C([C@H]([C@@H]([C@@H](C(=O)CO)O)O)O)O	C6H12O6	180.156	D-Tagatose (CAS: 87-81-0), a rare natural hexoketose, is an isomer of D-galactose. D-Tagatose occurs naturally in Sterculia setigera gum, and it is also found in small quantities in various foods such as sterilized and powdered cow's milk, hot cocoa, and a variety of cheeses, yogurts, and other dairy products. It can be synthesized from D-galactose by isomerization under alkaline conditions in th…
D-Threitol	HMDB0004136	222285	C16884	C([C@H]([C@@H](CO)O)O)O	C4H10O4	122.12	D-Threitol can be regarded as the main end product of D-xylose metabolism in hummans. Threitol is a C4-polyol (tetritol); the total C4-polyol concentration of threitol decreases with age. Several inborn errors of metabolism with abnormal polyol concentrations in body fluids are known to date (such as pentosuria and galactosemia). Most of these defects can be diagnosed by the assessment of urinary…
D-Xylitol	HMDB0002917	6912	C00379	C([C@H](C([C@H](CO)O)O)O)O	C5H12O5	152.146	Xylitol is a five-carbon sugar alcohol that is obtained through the diet. It is not endogenously produced by humans. Xylitol is used as a diabetic sweetener which is roughly as sweet as sucrose with 33% fewer calories. Xylitol is naturally found in many fruits (strawberries, plums, raspberries) and vegetables (e.g. cauliflower). Because of fruit and vegetable consumption the human body naturally …
D-Xylose	HMDB0000098	135191	C00181	C1[C@H]([C@@H]([C@H](C(O1)O)O)O)O	C5H10O5	150.13	Xylose or wood sugar is an aldopentose - a monosaccharide containing five carbon atoms and an aldehyde functional group. It has chemical formula C5H10O5 and is 40% as sweet as sucrose. Xylose is found in the embryos of most edible plants. The polysaccharide xylan, which is closely associated with cellulose, consists practically entirely of d-xylose. Corncobs, cottonseed hulls, pecan shells, and s…
Erythritol	HMDB0002994	222285	C16884	C([C@H]([C@H](CO)O)O)O	C4H10O4	122.12	Erythritol occurs widely in nature and has been found to occur naturally in several foods including wine, sake, beer, watermelon, pear, grape, and soy sauce. Evidence indicates that erythritol also exists endogenously in the tissues and body fluids of humans and animals. Erythritol is absorbed from the proximal intestine by passive diffusion in a manner similar to that of many low molecular weigh…
Ethanolamine	HMDB0000149	700	C00189	C(CO)N	C2H7NO	61.0831	Ethanolamine, also known as aminoethanol or glycinol, belongs to the class of organic compounds known as 1,2-aminoalcohols. These are organic compounds containing an alkyl chain with an amine group bound to the C1 atom and an alcohol group bound to the C2 atom. Ethanolamine is a very strong basic compound (based on its pKa). Ethanolamine exists in all living species, ranging from bacteria to huma…
Formic acid	HMDB0000142	284	C00058	C(=O)O	CH2O2	46.0254	Formic acid is the simplest carboxylic acid. Formate is an intermediate in normal metabolism. It takes part in the metabolism of one-carbon compounds and its carbon may appear in methyl groups undergoing transmethylation. It is eventually oxidized to carbon dioxide. Formate is typically produced as a byproduct in the production of acetate. It is responsible for both metabolic acidosis and disrupt…
Fumaric acid	HMDB0000134	444972	C00122	C(=C/C(=O)O)\C(=O)O	C4H4O4	16.0722	Fumaric acid is a dicarboxylic acid. It is a precursor to L-malate in the Krebs tricarboxylic acid (TCA) cycle. It is formed by the oxidation of succinic acid by succinate dehydrogenase. Fumarate is converted by the enzyme fumarase to malate. Fumaric acid has recently been identified as an oncometabolite or an endogenous, cancer causing metabolite. High levels of this organic acid can be found in…
Glucaric acid	HMDB0000663	33037	C00818	[C@H]([C@@H]([C@@H](C(=O)O)O)O)([C@H](C(=O)O)O)O	C6H10O8	210.139	Glucaric acid, also known as glucarate or D-saccharic acid, belongs to the class of organic compounds known as glucuronic acid derivatives. Glucuronic acid derivatives are compounds containing a glucuronic acid moiety (or a derivative), which consists of a glucose moiety with the C6 carbon oxidized to a carboxylic acid. Glucaric acid is a very hydrophobic molecule, practically insoluble (in water…
Glutamylcysteine	HMDB0028816	10171468	NA	C(CC(=O)O)[C@@H](C(=O)N[C@@H](CS)C(=O)O)N	C8H14N2O5S	250.27	Glutamylcysteine is a dipeptide composed of glutamate and cysteine, and is a proteolytic breakdown product of larger proteins. It belongs to the family of N-acyl-alpha amino acids and derivatives. These are compounds containing an alpha amino acid which bears an acyl group at its terminal nitrogen atom. Glutamylcysteine is an incomplete breakdown product of protein digestion or protein catabolism…
Glutaric acid	HMDB0000661	743	C00489	C(CC(=O)O)CC(=O)O	C5H8O4	132.115	Glutaric acid is a simple five-carbon linear dicarboxylic acid. Glutaric acid is naturally produced in the body during the metabolism of some amino acids, including lysine and tryptophan. Glutaric acid may cause irritation to the skin and eyes. When present in sufficiently high levels, glutaric acid can act as an acidogen and a metabotoxin. An acidogen is an acidic compound that induces acidosis,…
Glyceraldehyde	HMDB0001051	751	C02154	C(C(C=O)O)O	C3H6O3	90.0779	Glyceraldehyde is a triose monosaccharide with chemical formula C3H6O3. It is the simplest of all common aldoses. It is a sweet, colourless crystalline solid that is an intermediate compound in carbohydrate metabolism. The word "glyceraldehyde" comes from combining glycerine and aldehyde, as glyceraldehyde is merely glycerine with one hydroxide changed to an aldehyde. Glyceraldehyde is produced f…
Glyceric acid	HMDB0000139	439194	C00258	C([C@H](C(=O)O)O)O	C3H6O4	106.077	Glyceric acid is a colourless syrupy acid, obtained from oxidation of glycerol. It is a compound that is secreted excessively in the urine by patients suffering from D-glyceric aciduria, an inborn error of metabolism, and D-glycerate anemia. Deficiency of human glycerate kinase leads to D-glycerate acidemia/D-glyceric aciduria. Symptoms of the disease include progressive neurological impairment, …
Glycerol	HMDB0000131	753	C00116	C(C(CO)O)O	C3H8O3	92.0938	Glycerol or glycerin is a colourless, odourless, viscous liquid that is sweet-tasting and mostly non-toxic. It is widely used in the food industry as a sweetener and humectant and in pharmaceutical formulations. Glycerol is an important component of triglycerides (i.e. fats and oils) and of phospholipids. Glycerol is a three-carbon substance that forms the backbone of fatty acids in fats. When th…
Glycine	HMDB0000123	750	C00037	C(C(=O)O)N	C2H5NO2	75.0666	Glycine is a simple, nonessential amino acid, although experimental animals show reduced growth on low-glycine diets. The average adult ingests 3 to 5 grams of glycine daily. Glycine is involved in the body's production of DNA, phospholipids, and collagen, and in the release of energy. Glycine levels are effectively measured in plasma in both normal patients and those with inborn errors of glycin…
Glycocholic acid	HMDB0000138	23617285	C01921	C[C@H](CCC(=O)NCC(=O)O)[C@H]1CC[C@@H]2[C@@]1([C@H](C[C@H]3[C@H]2[C@@H](CC4[C@@]3(CC[C@H](C4)O)C)O)O)C	C26H43NO6	465.663	Glycocholic acid is an acyl glycine and a bile acid-glycine conjugate. It is a secondary bile acid produced by the action of enzymes existing in the microbial flora of the colonic environment. Bacteroides, Bifidobacterium, Clostridium and Lactobacillus are involved in bile acid metabolism and produce glycocholic acid (PMID: 6265737 ; 10629797). In hepatocytes, both primary and secondary bile acid…
Glycolate	HMDB0000115	3460	C00160	NA	C2H4O3	76.0514	Glycolic acid (or hydroxyacetic acid) is the smallest alpha-hydroxy acid (AHA). This colourless, odourless, and hygroscopic crystalline solid is highly soluble in water. Due to its excellent capability to penetrate skin, glycolic acid is often used in skin care products, most often as a chemical peel. It may reduce wrinkles, acne scarring, and hyperpigmentation and improve many other skin conditi…
Glycyl-glycine	HMDB0011733	11163	C02037	C(C(=O)NCC(=O)O)N	C4H8N2O3	132.118	The simplest peptide, made of two glycine molecules; used in the synthesis of more complicated peptides. Glycine is a simple, nonessential amino acid, although experimental animals show reduced growth on low-glycine diets. The average adult ingests 3 to 5 grams of glycine daily. Glycine is involved in the body's production of DNA, phospholipids and collagen, and in release of energy. Glycine leve…
Guanidoacetic acid	HMDB0000128	763	C00581	C(C(=O)O)N=C(N)N	C3H7N3O2	117.107	Guanidoacetic acid, also known as guanidinoacetate or N-amidinoglycine, belongs to the class of organic compounds known as alpha amino acids and derivatives. These are amino acids in which the amino group is attached to the carbon atom immediately adjacent to the carboxylate group (alpha carbon), or a derivative thereof. Guanidinoacetic acid was first prepared in 1861 by Adolph Strecker by reacti…
Hippuric acid	HMDB0000714	464	C01586	C1=CC=C(C=C1)C(=O)NCC(=O)O	C9H9NO3	179.173	Hippuric acid is an acyl glycine formed from the conjugation of benzoic acid with glycine. Acyl glycines are produced through the action of glycine N-acyltransferase (EC 2.3.1.13) which is an enzyme that catalyzes the chemical reaction: acyl-CoA + glycine < -- > CoA + N-acylglycine. Hippuric acid is a normal component of urine and is typically increased with increased consumption of phenolic comp…
Hydroxykynurenine	HMDB0000732	89	C02794	C1=CC(=C(C(=C1)O)N)C(=O)CC(C(=O)O)N	C10H12N2O4	224.213	Hydroxykynurenine, also known as OH-kynurenine, belongs to the class of organic compounds known as alkyl-phenylketones. These are aromatic compounds containing a ketone substituted by one alkyl group, and a phenyl group. Hydroxykynurenine is a very strong basic compound (based on its pKa). In humans, hydroxykynurenine is involved in tryptophan metabolism.
Hypoxanthine	HMDB0000157	790	C00262	C1=NC2=C(N1)C(=O)N=CN2	C5H4N4O	136.112	Hypoxanthine, also known as purine-6-ol or Hyp, belongs to the class of organic compounds known as hypoxanthines. Hypoxanthines are compounds containing the purine derivative 1H-purin-6(9H)-one. Purine is a bicyclic aromatic compound made up of a pyrimidine ring fused to an imidazole ring. Hypoxanthine is a naturally occurring purine derivative and a reaction intermediate in the metabolism of ade…
Indoxyl sulfate	HMDB0000682	10258	NA	C1=CC=C2C(=C1)C(=CN2)OS(=O)(=O)O	C8H7NO4S	213.21	Indoxyl sulfate is a dietary protein metabolite and also a metabolite of the common amino acid tryptophan. It has been identified as a uremic toxin according to the European Uremic Toxin Working Group (PMID: 22626821 ). It is a circulating uremic toxin stimulating glomerular sclerosis and interstitial fibrosis. Indoxyl sulfate is one of the well-known substances of a group of protein-bound uremic…
Inosine	HMDB0000195	6021	C00294	C1=NC(=O)C2=C(N1)N(C=N2)[C@H]3[C@@H]([C@@H]([C@H](O3)CO)O)O	C10H12N4O5	268.226	Inosine, also known as hypoxanthosine or inotin, belongs to the class of organic compounds known as purine nucleosides. Purine nucleosides are compounds comprising a purine base attached to a ribosyl or deoxyribosyl moiety. Inosine is a moderately basic compound (based on its pKa). Inosine exists in all living species, ranging from bacteria to humans. Within humans, inosine participates in a numb…
Isocitric acid	HMDB0000193	1198	C00311	C(C(C(C(=O)O)O)C(=O)O)C(=O)O	C6H8O7	192.124	Isocitric acid, also known as isocitrate or i-cit, belongs to the class of organic compounds known as tricarboxylic acids and derivatives. These are carboxylic acids containing exactly three carboxyl groups. Isocitric acid is an extremely weak basic (essentially neutral) compound (based on its pKa). Click on genes, proteins and metabolites below to link to respective articles. An isocitric acid v…
L-Acetylcarnitine	HMDB0000201	7045767	C02571	CC(=O)OC(CC(=O)[O-])C[N+](C)(C)C	C9H17NO4	203.238	L-Acetylcarnitine (ALCAR or ALC) is an acetic acid ester of carnitine that facilitates the movement of acetyl-CoA into the matrices of mammalian mitochondria during the oxidation of fatty acids. In addition to his metabolic role, L-acetylcarnitine posses unique neuroprotective, neuromodulatory, and neurotrophic properties. This may play an important role in counteracting various disease processes…
L-Alanine	HMDB0000161	5950	C00041	C[C@@H](C(=O)O)N	C3H7NO2	89.0932	Alanine is a non-essential amino acid made in the body from either the conversion of the carbohydrate pyruvate or the breakdown of DNA and the dipeptides carnosine and anserine. It is highly concentrated in muscle and is one of the most important amino acids released by muscle, functioning as a major energy source. Plasma alanine is often decreased when the BCAA (branched-chain amino acids) are d…
L-Alpha-aminobutyric acid	HMDB0000452	80283	C02356	CC[C@@H](C(=O)O)N	C4H9NO2	103.12	L-alpha-Aminobutyric acid, also known as (S)-2-aminobutanoic acid, homoalanine, 2-AABA, ethylglycine, or L-butyrine, is a member of the class of compounds known as L-alpha-amino acids. L-alpha-Amino acids are alpha amino acids which have the L-configuration of the alpha-carbon atom. L-alpha-aminobutyric acid is soluble (in water) and is a moderately acidic compound (based on its pKa). L-alpha-Ami…
L-Asparagine	HMDB0000168	6267	C00152	C([C@@H](C(=O)O)N)C(=O)N	C4H8N2O3	132.118	Asparagine (Asn) is one of the 20 most common natural amino acids on Earth. It has carboxamide as the side chain's functional group. Asparagine is not an essential amino acid, which means that it can be synthesized from central metabolic pathway intermediates in humans and is not required in the diet. The precursor to asparagine is oxaloacetate. Oxaloacetate is converted to aspartate using a tran…
L-Aspartic acid	HMDB0000191	5960	C00049	C([C@@H](C(=O)O)N)C(=O)O	C4H7NO4	133.103	Aspartic acid (Asp, D), also known as aspartate, the name of its anion, is one of the 20 natural proteinogenic amino acids which are the building blocks of proteins. As its name indicates, aspartic acid is the carboxylic acid analog of asparagine. As a neurotransmitter, aspartic acid may provide resistance to fatigue and thus lead to endurance, although the evidence to support this idea is not st…
L-Carnitine	HMDB0000062	2724480	C00318	C[N+](C)(C)C[C@H](CC(=O)[O-])O	C7H15NO3	161.199	Carnitine is not an essential amino acid; it can be synthesized in the body. However, it is so important in providing energy to muscles (including the heart) that some researchers are now recommending carnitine supplements in the diet, particularly for people who do not consume much red meat (the main food source for carnitine). Carnitine has been described as a vitamin, an amino acid, or a metab…
L-Cystathionine	HMDB0000099	439258	C02291	C(CSC[C@@H](C(=O)O)N)[C@@H](C(=O)O)N	C7H14N2O4S	222.262	Cystathionine is a dipeptide formed by serine and homocysteine. Cystathioninuria is a prominent manifestation of vitamin-B6 deficiency. The transsulfuration of methionine yields homocysteine, which combines with serine to form cystathionine, the proximate precursor of cysteine through the enzymatic activity of cystathionase. In conditions in which cystathionine gamma-synthase or cystathionase is …
Levoglucosan	HMDB0000640	2724705	NA	C1[C@@H]2[C@H]([C@@H]([C@H]([C@H](O1)O2)O)O)O	C6H10O5	162.141	Levoglucosan is an anhydrohexose that is the 1,6-anhydro-derivative of beta-D-glucopyranose. It is formed from the pyrolysis of carbohydrates, such as starch and cellulose. As a result, levoglucosan is often used as a chemical tracer for biomass burning in atmospheric chemistry studies, particularly with respect to airborne particulate matter. Levoglucosan in urine has been shown to be highly cor…
L-Fucose	HMDB0000174	25310	C00507	C[C@H]1[C@H]([C@H]([C@@H](C(O1)O)O)O)O	C6H12O5	164.156	Fucose (CAS: 2438-80-4) is a hexose deoxy sugar with the chemical formula C6H12O5. L-Fucose (6-deoxy-L-galactose) is a monosaccharide that is a common component of many N- and O-linked glycans and glycolipids produced by mammalian cells. It is the fundamental subunit of the fucoidan polysaccharide. As a free sugar, L-fucose is normally found at very low levels in mammals. It is unique in that it …
L-Glutamic acid	HMDB0000148	33032	C00025	C(CC(=O)O)[C@@H](C(=O)O)N	C5H9NO4	147.129	Glutamic acid (Glu), also referred to as glutamate (the anion), is one of the 20 proteinogenic amino acids. It is not among the essential amino acids. Glutamate is a key molecule in cellular metabolism. In humans, dietary proteins are broken down by digestion into amino acids, which serves as metabolic fuel or other functional roles in the body. Glutamate is the most abundant fast excitatory neur…
L-Glutamine	HMDB0000641	5961	C00064	C(CC(=O)N)[C@@H](C(=O)O)N	C5H10N2O3	146.144	Glutamine (Gln) is one of the 20 amino acids encoded by the standard genetic code. In humans it is considered a non-essential amino acid. Structurally, glutamine is similar to the amino acid glutamic acid. However, instead of having a terminal carboxylic acid, it has an amide. Enzymatically, glutamine is formed by replacing a side-chain hydroxyl of glutamic acid with an amine functional group. Gl…
L-Histidine	HMDB0000177	6274	C00135	C1=C(NC=N1)C[C@@H](C(=O)O)N	C6H9N3O2	155.155	Histidine is an alpha-amino acid with an imidazole functional group. It is one of the 22 proteinogenic amino acids. Histidine was first isolated by German physician Albrecht Kossel in 1896. Histidine is an essential amino acid in humans and other mammals. It was initially thought that it was only essential for infants, but longer-term studies established that it is also essential for adults. Infa…
L-Homoserine	HMDB0000719	12647	C00263	C(CO)[C@@H](C(=O)O)N	C4H9NO3	119.119	Homoserine is a more reactive variant of the amino acid serine. In this variant, the hydroxyl side chain contains an additional CH2 group which brings the hydroxyl group closer to its own carboxyl group, allowing it to chemically react to form a five-membered ring. This occurs at the point that amino acids normally join to their neighbours in a peptide bond. Homoserine is therefore unsuitable for…
L-Isoleucine	HMDB0000172	6306	C00407	CC[C@H](C)[C@@H](C(=O)O)N	C6H13NO2	131.173	Branched chain amino acids (BCAA) are essential amino acids whose carbon structure is marked by a branch point. These three amino acids are critical to human life and are particularly involved in stress, energy and muscle metabolism. BCAA supplementation as therapy, both oral and intravenous, in human health and disease holds great promise. "BCAA" denotes valine, isoleucine and leucine which are …
L-Kynurenine	HMDB0000684	161166	C00328	C1=CC=C(C(=C1)C(=O)C[C@@H](C(=O)O)N)N	C10H12N2O3	208.214	L-Kynurenine, also known as quinurenine, belongs to the class of organic compounds known as alkyl-phenylketones. These are aromatic compounds containing a ketone substituted by one alkyl group, and a phenyl group. Kynurenine is also associated with tics. L-Kynurenine is a drug. L-Kynurenine is a very strong basic compound (based on its pKa). L-Kynurenine exists in all eukaryotes, ranging from yea…
L-Lactic acid	HMDB0000190	61503	C00256	C[C@@H](C(=O)O)O	C3H6O3	90.0779	Lactic acid is an organic acid. It is a chiral molecule, consisting of two optical isomers, L-lactic acid and D-lactic acid, with the L-isomer being the most common in living organisms. Lactic acid plays a role in several biochemical processes and is produced in the muscles during intense activity. In animals, L-lactate is constantly produced from pyruvate via the enzyme lactate dehydrogenase (LD…
L-Leucine	HMDB0000687	6106	C00123	CC(C)C[C@@H](C(=O)O)N	C6H13NO2	131.173	Leucine (abbreviated as Leu or L) is an α-amino acid that is used in the biosynthesis of proteins. It contains an α-amino group (which is in the protonated −NH3+ form under biological conditions), an α-carboxylic acid group (which is in the deprotonated −COO− form under biological conditions), and a side chain isobutyl group, making it a non-polar aliphatic amino acid. It is essential in humans, …
L-Lysine	HMDB0000182	5962	C00047	C(CCN)C[C@@H](C(=O)O)N	C6H14N2O2	146.188	L-lysine is an essential amino acid. Normal requirements for lysine have been found to be about 8 g per day or 12 mg/kg in adults. Children and infants need more, 44 mg/kg per day for an eleven to-twelve-year old, and 97 mg/kg per day for three-to six-month old. Lysine is highly concentrated in muscle compared to most other amino acids. Lysine is high in foods such as wheat germ, cottage cheese a…
L-Malic acid	HMDB0000156	222656	C00149	C([C@@H](C(=O)O)O)C(=O)O	C4H6O5	134.087	Malic acid (CAS: 6915-15-7) is a tart-tasting organic dicarboxylic acid that plays a role in many sour or tart foods. Apples contain malic acid, which contributes to the sourness of a green apple. Malic acid can make a wine taste tart, although the amount decreases with increasing fruit ripeness (Wikipedia). In its ionized form, malic acid is called malate. Malate is an intermediate of the TCA cy…
L-Methionine	HMDB0000696	6137	C00073	CSCC[C@@H](C(=O)O)N	C5H11NO2S	149.211	Methionine is an essential amino acid (there are 9 essential amino acids) required for normal growth and development of humans, other mammals, and avian species. In addition to being a substrate for protein synthesis, it is an intermediate in transmethylation reactions, serving as the major methyl group donor in vivo, including the methyl groups for DNA and RNA intermediates. Methionine is a meth…
L-Phenylalanine	HMDB0000159	6140	C00079	C1=CC=C(C=C1)C[C@@H](C(=O)O)N	C9H11NO2	165.189	Phenylalanine is an essential amino acid and the precursor of the amino acid tyrosine. Like tyrosine, phenylalanine is also a precursor for catecholamines including tyramine, dopamine, epinephrine, and norepinephrine. Catecholamines are neurotransmitters that act as adrenalin-like substances. Interestingly, several psychotropic drugs (mescaline, morphine, codeine, and papaverine) also have phenyl…
L-Proline	HMDB0000162	145742	C00148	C1C[C@H](NC1)C(=O)O	C5H9NO2	115.13	L-proline is one of the twenty amino acids used in living organisms as the building blocks of proteins. Proline is sometimes called an imino acid, although the IUPAC definition of an imine requires a carbon-nitrogen double bond. Proline is a non-essential amino acid that is synthesized from glutamic acid. It is an essential component of collagen and is important for proper functioning of joints a…
L-Serine	HMDB0000187	5951	C00065	C([C@@H](C(=O)O)N)O	C3H7NO3	105.093	Serine is a nonessential amino acid derived from glycine. Like all the amino acid building blocks of protein and peptides, serine can become essential under certain conditions, and is thus important in maintaining health and preventing disease. Low-average concentration of serine compared to other amino acids is found in muscle. Serine is highly concentrated in all cell membranes. (http://www.dcn…
L-Threonine	HMDB0000167	6288	C00188	C[C@H]([C@@H](C(=O)O)N)O	C4H9NO3	119.119	Threonine is an essential amino acid in humans. It is abundant in human plasma, particularly in newborns. Severe deficiency of threonine causes neurological dysfunction and lameness in experimental animals. Threonine is an immunostimulant which promotes the growth of thymus gland. It also can probably promote cell immune defense function. This amino acid has been useful in the treatment of geneti…
L-Tryptophan	HMDB0000929	6305	C00078	C1=CC=C2C(=C1)C(=CN2)C[C@@H](C(=O)O)N	C11H12N2O2	204.225	Tryptophan is an essential amino acid that is the precursor of both serotonin and melatonin. Melatonin is a hormone that is produced by the pineal gland in animals, which regulates sleep and wakefulness. Serotonin is a brain neurotransmitter, platelet clotting factor, and neurohormone found in organs throughout the body. Metabolism of tryptophan into serotonin requires nutrients such as vitamin B…
L-Tyrosine	HMDB0000158	6057	C00082	C1=CC(=CC=C1C[C@@H](C(=O)O)N)O	C9H11NO3	181.189	Tyrosine is an essential amino acid that readily passes the blood-brain barrier. Once in the brain, it is a precursor for the neurotransmitters dopamine, norepinephrine and epinephrine, better known as adrenalin. These neurotransmitters are an important part of the body's sympathetic nervous system, and their concentrations in the body and brain are directly dependent upon dietary tyrosine. Tyros…
L-Valine	HMDB0000883	6287	C00183	CC(C)[C@@H](C(=O)O)N	C5H11NO2	117.164	Valine (abbreviated as Val or V) is an -amino acid with the chemical formula HO2CCH(NH2)CH(CH3)2. It is named after the plant valerian. L-Valine is one of 20 proteinogenic amino acids. Its codons are GUU, GUC, GUA, and GUG. This essential amino acid is classified as nonpolar. Along with leucine and isoleucine, valine is a branched-chain amino acid. Branched chain amino acids (BCAA) are essential …
Maleic acid	HMDB0000176	444972	C00122	C(=C\C(=O)O)\C(=O)O	C4H4O4	116.072	Maleic acid is an industrial raw material for the production of glyoxylic acid by ozonolysis. Maleic acid is an organic compound which is a dicarboxylic acid (molecule with two carboxyl groups). The molecule consists of an ethylene group flanked by two carboxylic acid groups. Maleic acid is the cis isomer of butenedioic acid, whereas fumaric acid is the trans isomer. The cis isomer is the less st…
Malic acid	HMDB0000744	525	C03668	C(C(C(=O)O)O)C(=O)O	C4H6O5	134.087	Malic acid (CAS: 6915-15-7) is a tart-tasting organic dicarboxylic acid that plays a role in many sour or tart foods. Apples contain malic acid, which contributes to the sourness of a green apple. Malic acid can make a wine taste tart, although the amount decreases with increasing fruit ripeness (Wikipedia). In its ionized form, malic acid is called malate. Malate is an intermediate of the TCA cy…
Melibiose	HMDB0000048	440658	C05400	C([C@@H]1[C@@H]([C@@H]([C@H]([C@H](O1)OC[C@@H]2[C@H]([C@@H]([C@H](C(O2)O)O)O)O)O)O)O)O	C12H22O11	342.296	Melibiose (CAS: 585-99-9) is a disaccharide consisting of one galactose and one glucose moiety in an alpha (1-6) glycosidic linkage. This sugar is produced and metabolized only by enteric and lactic acid bacteria and other microbes, such as Dickeya dadantii, Escherichia, Leuconostoc, and Saccharomyces (PMID: 19734309 , 28453942 ). It is not an endogenous metabolite but may be obtained from the co…
Methylamine	HMDB0000164	6329	C00218	CN	CH5N	31.0571	Methylamine occurs endogenously from amine catabolism and its tissue levels increase in some pathological conditions, including diabetes. Interestingly, methylamine and ammonia levels are reciprocally controlled by a semicarbazide-sensitive amine oxidase activity that deaminates methylamine to formaldehyde with the production of ammonia and hydrogen peroxide. Methylamine also targets the voltage-…
Methylcysteine	HMDB0002108	384585100	C22040	CSC[C@@H](C(=O)O)N	C4H9NO2S	135.18	Methylcysteine is one of the identified number of bioactive substances in garlic that are water soluble. (PMID 16484549 ). It has been suggested that the use of these organosulfur agents derived from garlic could protect partially oxidized and glycated LDL or plasma against further oxidative and glycative deterioration, which might benefit patients with diabetic-related vascular diseases. (PMID 1…
Methylmalonic acid	HMDB0000202	487	C02170	CC(C(=O)O)C(=O)O	C4H6O4	118.088	Methylmalonic acid is a malonic acid derivative, which is a vital intermediate in the metabolism of fat and protein. In particular, the coenzyme A-linked form of methylmalonic acid, methylmalonyl-CoA, is converted into succinyl-CoA by methylmalonyl-CoA mutase in a reaction that requires vitamin B12 as a cofactor. In this way, methylmalonic acid enters the Krebs cycle and is thus part of one of th…
Methylsuccinic acid	HMDB0001844	10349	C08645	CC(CC(=O)O)C(=O)O	C5H8O4	132.115	Methylsuccinic acid (CAS: 498-21-5) is a normal metabolite found in human fluids. Increased urinary levels of methylsuccinic acid (together with ethylmalonic acid) are the main biochemical measurable features in ethylmalonic encephalopathy (OMIM: 602473 ), a rare metabolic disorder with an autosomal recessive mode of inheritance that is clinically characterized by neuromotor delay, hyperlactic ac…
myo-Inositol	HMDB0000211	NA	C00137	O[C@H]1[C@H](O)[C@@H](O)[C@H](O)[C@H](O)[C@@H]1O	C6H12O6	180.156	myo-Inositol is an inositol isoform. Inositol is a derivative of cyclohexane with six hydroxyl groups, making it a polyol. It also is known as a sugar alcohol, having exactly the same molecular formula as glucose or other hexoses. Inositol exists in nine possible stereoisomers, of which cis-1,2,3,5-trans-4,6-cyclohexanehexol, or myo-inositol is the most widely occurring form in nature. The other …
N-Acetyl-D-glucosamine	HMDB0000215	439174	C00140	CC(=O)N[C@@H]1[C@H]([C@@H]([C@H](OC1O)CO)O)O	C8H15NO6	221.208	N-Acetyl-D-glucosamine, also known as glcnac or N-acetylchitosamine, belongs to the class of organic compounds known as acylaminosugars. These are organic compounds containing a sugar linked to a chain through N-acyl group. N-Acetyl-D-glucosamine is an extremely weak basic (essentially neutral) compound (based on its pKa). Chemically it is an amide between glucosamine and acetic acid. N-Acetyl-D-…
N-Acetylgalactosamine	HMDB0000212	84265	C01074	CC(=O)N[C@@H]1[C@H]([C@H]([C@H](O[C@@H]1O)CO)O)O	C8H15NO6	221.208	Acetylgalactosamine is an important constituent of brain heteropolysaccharides (glycoproteins). The concentration of the N-acetylgalactosamine-containing glycoproteins in the 3-year-old cerebral gray matter from human brain is 7-15 times greater than in 8-year old tissue and 15-30 times greater than in 72-year-old tissue. (PMID 1207868 ). Acetylgalactosamine patterns of the composition of the sol…
N-Acetylglutamic acid	HMDB0001138	185	C00624	CC(=O)NC(CCC(=O)O)C(=O)O	C7H11NO5	189.166	N-Acetyl-L-glutamic acid (abbreviated NAcGlu) is an acetylated amino acid. N-Acetyl-L-glutamic acid is biosynthesized from glutamic acid and acetyl-CoA by the enzyme N-acetylglutamate synthase (NAGS). NAcGlu activates carbamoyl phosphate synthetase in the urea cycle. A deficiency in N-acetyl glutamate synthase or a genetic mutation in the gene coding for the enzyme will lead to urea cycle failure…
N-Acetyl-L-aspartic acid	HMDB0000812	65065	C01042	CC(=O)N[C@@H](CC(=O)O)C(=O)O	C6H9NO5	175.139	N-Acetylaspartic acid is a derivative of aspartic acid. It is the second most concentrated molecule in the brain after the amino acid glutamate. It is synthesized in neurons from the amino acid aspartate and acetyl coenzyme A (acetyl CoA). The various functions served by N-acetylaspartic acid are still under investigation, but the primary proposed functions include (1) acting as a neuronal osmoly…
N-Acetylornithine	HMDB0003357	439232	C00437	CC(=O)N[C@@H](CCCN)C(=O)O	C7H14N2O3	174.198	N2-Acetylornithine, also known as N(alpha)-acetylornithine, belongs to the class of organic compounds known as N-acyl-L-alpha-amino acids. These are N-acylated alpha-amino acids which have the L-configuration of the alpha-carbon atom. N-Acetylornithine is a minor component of the deproteinized blood plasma of human blood. Human blood plasma contains a variable amount of acetylornithine, averaging…
N-Acetylvaline	HMDB0011757	227752	NA	CC(C)C(C(=O)O)NC(=O)C	C7H13NO3	159.185	N-Acetylvaline (CAS: 3067-19-4) belongs to the class of organic compounds known as valine and derivatives. Valine and derivatives are compounds containing valine or a derivative thereof resulting from a reaction of valine at the amino group or the carboxy group, or from the replacement of any hydrogen of glycine by a heteroatom. N-Acetylvaline is an extremely weak basic (essentially neutral) comp…
O-Phosphoethanolamine	HMDB0000224	1015	C00346	C(COP(=O)(O)O)N	C2H8NO4P	141.063	O-Phosphoethanolamine, also known as colamine phosphoric acid or ethanolamine O-phosphate, belongs to the class of organic compounds known as phosphoethanolamines. Phosphoethanolamines are compounds containing a phosphate linked to the second carbon of an ethanolamine. One category termed a glycerophospholipid and the other a sphingomyelin, or more specifically within the sphingomyelin class, a s…
Ornithine	HMDB0000214	6262	C00077	C(C[C@@H](C(=O)O)N)CN	C5H12N2O2	132.161	L-ornithine, also known as (S)-2,5-diaminopentanoic acid or ornithine is a member of the class of compounds known as L-alpha-amino acids. L-alpha-amino acids are alpha amino acids which have the L-configuration of the alpha-carbon atom. L-ornithine is soluble (in water) and a moderately acidic compound. It has been claimed that ornithine improves athletic performance, has anabolic effects, has wo…
Oxalacetic acid	HMDB0000223	970	C00036	C(C(=O)C(=O)O)C(=O)O	C4H4O5	132.072	Oxalacetic acid, also known as keto-oxaloacetate or 2-oxobutanedioate, belongs to the class of organic compounds known as short-chain keto acids and derivatives. These are keto acids with an alkyl chain the contains less than 6 carbon atoms. Oxalacetic acid is a very hydrophobic molecule, practically insoluble (in water), and relatively neutral. Oxalacetic acid exists in all living species, rangi…
Oxalic acid	HMDB0002329	971	C00209	C(=O)(C(=O)O)O	C2H2O4	90.0349	Oxalic acid is a strong dicarboxylic acid occurring in many plants and vegetables. It is produced in the body by metabolism of glyoxylic acid or ascorbic acid. It is not metabolized but excreted in the urine. It is used as an analytical reagent and general reducing agent (Pubchem). Oxalic acid (IUPAC name: ethanedioic acid, formula H2C2O4) is a dicarboxylic acid with structure (HOOC)-(COOH). Beca…
Oxoglutaric acid	HMDB0000208	51	C00026	C(CC(=O)O)C(=O)C(=O)O	C5H6O5	146.098	Oxoglutaric acid, also known as alpha-ketoglutarate, alpha-ketoglutaric acid, AKG, or 2-oxoglutaric acid, is classified as a gamma-keto acid or a gamma-keto acid derivative. gamma-Keto acids are organic compounds containing an aldehyde substituted with a keto group on the C4 carbon atom. alpha-Ketoglutarate is considered to be soluble (in water) and acidic. alpha-Ketoglutarate is a key molecule i…
Palmitoleic acid	HMDB0003229	5312427	C08362	CCCCCC/C=C\CCCCCCCC(=O)O	C16H30O2	254.408	Palmitoleic acid, or 9-hexadecenoic acid, is an unsaturated fatty acid that is a common constituent of the glycerides of human adipose tissue. Present in all tissues, it is generally found in higher concentrations in the liver. Macadamia oil (Macadamia integrifolia) and sea buckthorn oil (Hippophae rhamnoides) are botanical sources of palmitoleic acid, containing 22 and 40% respectively (Wikipedi…
Pantothenic acid	HMDB0000210	6613	C00864	CC(C)(CO)C(C(=O)NCCC(=O)O)O	C9H17NO5	219.235	Pantothenic acid, also called vitamin B5, is a water-soluble vitamin required to sustain life. Pantothenic acid is needed to form coenzyme-A (CoA), and is thus critical in the metabolism and synthesis of carbohydrates, proteins, and fats. Its name is derived from the Greek pantothen meaning "from everywhere" and small quantities of pantothenic acid are found in nearly every food, with high amount…
Paraxanthine	HMDB0001860	4687	C13747	CN1C=NC2=C1C(=O)N(C(=O)N2)C	C7H8N4O2	180.164	Paraxanthine, also known as p-xanthine, belongs to the class of organic compounds known as xanthines. These are purine derivatives with a ketone group conjugated at carbons 2 and 6 of the purine moiety. Paraxanthine is an extremely weak basic (essentially neutral) compound (based on its pKa). Paraxanthine exists in all living organisms, ranging from bacteria to humans. Within humans, paraxanthine…
Pectin	HMDB0003402	65550	C08348	[C@@H]1([C@H]([C@H](O[C@H]([C@@H]1O)O)C(=O)O)O)O	C6H10O7	194.139	Pectin, also known as galacturonate or D-lyxose, belongs to the class of organic compounds known as glucuronic acid derivatives. Glucuronic acid derivatives are compounds containing a glucuronic acid moiety (or a derivative), which consists of a glucose moiety with the C6 carbon oxidized to a carboxylic acid. Pectin is a drug. Pectin is used in confectionery jellies to give a good gel structure, …
Pelargonic acid	HMDB0000847	8158	C01601	CCCCCCCCC(=O)O	C9H18O2	158.238	Pelargonic acid, or nonanoic acid, is a fatty acid which occurs naturally as esters is the oil of pelargonium. Synthetic esters, such as methyl nonanoate, are used as flavorings. Pelargonic acid is an organic compound composed of a nine-carbon chain terminating in a carboxylic acid. It is an oily liquid with an unpleasant, rancid odor. It is nearly insoluble in water, but well soluble in chlorofo…
Phenoxyacetic acid	HMDB0031609	19188	C02181	C1=CC=C(C=C1)OCC(=O)O	C8H8O3	152.147	Phenoxyacetic acid, also known as phenoxyacetate or POA, belongs to the class of organic compounds known as phenoxyacetic acid derivatives. Phenoxyacetic acid derivatives are compounds containing an anisole where the methane group is linked to an acetic acid or a derivative. Phenoxyacetic acid is an extremely weak basic (essentially neutral) compound (based on its pKa). In humans, phenoxyacetic a…
Phenylacetic acid	HMDB0000209	999	C07086	C1=CC=C(C=C1)CC(=O)O	C8H8O2	136.148	Phenyl acetate (or phenylacetate) is a carboxylic acid ester that has been found in the biofluids of patients with nephritis and/or hepatitis as well as patients with phenylketonuria (PKU), an inborn error of metabolism. Phenyl acetate has been identified as a uremic toxin according to the European Uremic Toxin Working Group (PMID: 22626821 ). Excess phenylalanine in the body can be disposed of t…
Phosphate	HMDB0001429	57424078	C00009	[O-]P(=O)([O-])[O-]	H3O4P	97.9952	Phosphate is a salt of phosphoric acid and is an essential component of life. Organic phosphates are important in biochemistry, biogeochemistry, and ecology. In biological systems, phosphorus is found as a free phosphate ion in solution and is called inorganic phosphate, to distinguish it from phosphates bound in various phosphate esters. Inorganic phosphate is generally denoted Pi and at physiol…
p-Hydroxyphenylacetic acid	HMDB0000020	127	C00642	C1=CC(=CC=C1CC(=O)O)O	C8H8O3	152.147	p-Hydroxyphenylacetic acid, also known as 4-hydroxybenzeneacetate, is classified as a member of the 1-hydroxy-2-unsubstituted benzenoids. 1-Hydroxy-2-unsubstituted benzenoids are phenols that are unsubstituted at the 2-position. p-Hydroxyphenylacetic acid is considered to be slightly soluble (in water) and acidic. p-Hydroxyphenylacetic acid can be synthesized from acetic acid. It is also a parent…
Propylthiouracil	HMDB0014690	657298	C07569	CCCC1=CC(=O)NC(=S)N1	C7H10N2OS	170.232	Propylthiouracil is only found in individuals that have used or taken this drug. It is a thiourea antithyroid agent. Propythiouracil inhibits the synthesis of thyroxine and inhibits the peripheral conversion of throxine to tri-iodothyronine. It is used in the treatment of hyperthyroidism. (From Martindale, The Extra Pharmacopeoia, 30th ed, p534)Propylthiouracil binds to thyroid peroxidase and the…
Pyroglutamic acid	HMDB0000267	7405	C01879	C1CC(=O)N[C@@H]1C(=O)O	C5H7NO3	129.114	Pyroglutamic acid (5-oxoproline) is a cyclized derivative of L-glutamic acid. It is an uncommon amino acid derivative in which the free amino group of glutamic acid cyclizes to form a lactam. It is formed nonenzymatically from glutamate, glutamine, and gamma-glutamylated peptides, but it can also be produced by the action of gamma-glutamylcyclotransferase on an L-amino acid. Elevated blood levels…
Pyruvic acid	HMDB0000243	1060	C00022	CC(=O)C(=O)O	C3H4O3	88.0621	Pyruvic acid is an intermediate compound in the metabolism of carbohydrates, proteins, and fats. In thiamine deficiency, its oxidation is retarded and it accumulates in the tissues, especially in nervous structures (From Stedman, 26th ed.). Biological Source: Intermediate in primary metabolism including fermentation processes. Present in muscle in redox equilibrium with Lactic acid. A common cons…
Quinolinic acid	HMDB0000232	1066	C03722	C1=CC(=C(N=C1)C(=O)O)C(=O)O	C7H5NO4	167.119	Quinolinic acid, also known as quinolinate, belongs to the class of organic compounds known as pyridinecarboxylic acids. Pyridinecarboxylic acids are compounds containing a pyridine ring bearing a carboxylic acid group. Quinolinic acid is a very strong basic compound (based on its pKa). Quinolinic acid has been detected, but not quantified in, several different foods, such as Ceylon cinnamons, pi…
Ribitol	HMDB0000508	NA	C00474	OC[C@H](O)[C@H](O)[C@H](O)CO	C5H12O5	152.146	Ribitol is a metabolic end product formed by the reduction of ribose in human fibroblasts and erythrocytes (pentitol, sugar alcohol, polyol). Export of ribitol across the cell membrane indicates that can be cleared from the body without metabolic conversion (PMID 15234337 ). Several inborn errors of metabolism with abnormal polyol concentrations in body fluids are known to date, such as ribose-5-…
Shikimic acid	HMDB0003070	8742	C00493	C1[C@H]([C@@H]([C@@H](C=C1C(=O)O)O)O)O	C7H10O5	174.151	Shikimic acid, more commonly known as its anionic form shikimate, is an important biochemical intermediate in plants and microorganisms. Its name comes from the Japanese flower shikimi (シキミ, Illicium anisatum), from which it was first isolated. Shikimic acid is a precursor for: the aromatic amino acids phenylalanine and tyrosine; indole, indole derivatives and tryptophan; many alkaloids and other…
Spermidine	HMDB0001257	1102	C00315	C(CCNCCCN)CN	C7H19N3	145.246	Spermidine, also known as SPD, belongs to the class of organic compounds known as dialkylamines. These are organic compounds containing a dialkylamine group, characterized by two alkyl groups bonded to the amino nitrogen. Spermidine is a very strong basic compound (based on its pKa). Abnormal bleeding, such as bleeding spontaneously or profusely from a very minor injury can also occur. Spermidine…
Succinic acid	HMDB0000254	1110	C00042	C(CC(=O)O)C(=O)O	C4H6O4	118.088	Succinic acid is a dicarboxylic acid. The anion, succinate, is a component of the citric acid or TCA cycle and is capable of donating electrons to the electron transfer chain. Succinate dehydrogenase (SDH) plays an important role in mitochondrial function, being both part of the respiratory chain and the Krebs cycle. SDH with a covalently attached FAD prosthetic group, is able to bind several dif…
Sucrose	HMDB0000258	5988	C00089	C([C@@H]1[C@H]([C@@H]([C@H]([C@H](O1)O[C@]2([C@H]([C@@H]([C@H](O2)CO)O)O)CO)O)O)O)O	C12H22O11	342.296	Sucrose is a nonreducing disaccharide composed of glucose and fructose linked via their anomeric carbons. It is obtained commercially from sugarcane (Saccharum officinarum), sugar beet (Beta vulgaris), and other plants and used extensively as a food and a sweetener. Sucrose is derived by crushing and extracting sugarcane with water or by extracting sugar beet with water, evaporating, and purifyin…
Sulpiride	HMDB0014535	5355	NA	CCN1CCCC1CNC(=O)C2=C(C=CC(=C2)S(=O)(=O)N)OC	C15H23N3O4S	341.426	Sulpiride is only found in individuals that have used or taken this drug. It is a dopamine D2-receptor antagonist. It has been used therapeutically as an antidepressant, antipsychotic, and as a digestive aid. (From Merck Index, 11th ed)In contrast to most other neuroleptics which block both dopamine D1 and D2 receptors, Sulpiride is more selective and acts primarily as a dopamine D2 antagonist. S…
Taurine	HMDB0000251	1123	C00245	C(CS(=O)(=O)O)N	C2H7NO3S	125.147	Taurine is a sulfur amino acid like methionine, cystine, cysteine, and homocysteine. It is a lesser-known amino acid because it is not incorporated into the structural building blocks of protein. Yet taurine is an essential amino acid in pre-term and newborn infants of humans and many other species. Adults can synthesize their own taurine, yet are probably dependent, in part, on dietary taurine. …
trans-Aconitic acid	HMDB0000958	444212	C02341	C(/C(=C\C(=O)O)/C(=O)O)C(=O)O	C6H6O6	174.108	trans-Aconitic acid, also known as trans-aconitate or (e)-aconitic acid, belongs to the class of organic compounds known as tricarboxylic acids and derivatives. These are carboxylic acids containing exactly three carboxyl groups. trans-Aconitic acid is a weakly acidic compound (based on its pKa). trans-Aconitic acid exists in all living species, ranging from bacteria to humans. trans-Aconitic aci…
Trehalose	HMDB0000975	7427	C01083	C([C@@H]1[C@H]([C@@H]([C@H]([C@H](O1)O[C@@H]2[C@@H]([C@H]([C@@H]([C@H](O2)CO)O)O)O)O)O)O)O	C12H22O11	342.296	Trehalose, also known as mycose, is a 1-alpha (disaccharide) sugar found extensively but not abundantly in nature. It is thought to be implicated in anhydrobiosis - the ability of plants and animals to withstand prolonged periods of desiccation. The sugar is thought to form a gel phase as cells dehydrate, which prevents disruption of internal cell organelles by effectively splinting them in posit…
Trigonelline	HMDB0000875	5570	C01004	C[N+]1=CC=CC(=C1)C(=O)[O-]	C7H7NO2	137.136	Trigonelline, also known as caffearin or gynesine, belongs to the class of organic compounds known as alkaloids and derivatives. These are naturally occurring chemical compounds that contain mostly basic nitrogen atoms. This group also includes some related compounds with neutral and even weakly acidic properties. Also some synthetic compounds of similar structure are attributed to alkaloids. In …
Trimethylamine N-oxide	HMDB0000925	1145	C01104	C[N+](C)(C)[O-]	C3H9NO	75.1097	Trimethylamine N-oxide (TMAO) is an oxidation product of trimethylamine and a common metabolite in animals and humans. In particular, trimethylamine-N-oxide is biosynthesized endogenously from trimethylamine, which is derived from choline, which can be derived from dietary lecithin (phosphatidylcholines) or dietary carnitine. TMAO decomposes to trimethylamine (TMA), which is the main odorant that…
Uracil	HMDB0000300	1174	C00106	C1=CNC(=O)NC1=O	C4H4N2O2	112.087	Uracil, also known as U or hybar X, belongs to the class of organic compounds known as pyrimidones. Pyrimidones are compounds that contain a pyrimidine ring, which bears a ketone. Pyrimidine is a 6-membered ring consisting of four carbon atoms and two nitrogen centers at the 1- and 3- ring positions. Uracil is an extremely weak basic (essentially neutral) compound (based on its pKa). Uracil exist…
Uridine	HMDB0000296	6029	C00299	C1=CN(C(=O)NC1=O)[C@H]2[C@@H]([C@@H]([C@H](O2)CO)O)O	C9H12N2O6	244.201	Uridine, also known as beta-uridine or 1-beta-D-ribofuranosylpyrimidine-2,4(1H,3H)-dione, is a member of the class of compounds known as pyrimidine nucleosides. Pyrimidine nucleosides are compounds comprising a pyrimidine base attached to a ribosyl or deoxyribosyl moiety. More specifically, uridine is a nucleoside consisting of uracil and D-ribose and a component of RNA. Uridine is soluble (in wa…
