# Supplementary material for: Oncometabolite D-2-hydroxyglutarate - dependent metabolic reprogramming induces skeletal muscle atrophy during cancer cachexia
Source: Research Square preprint supplement (doi:10.21203/rs.3.rs-1246702/v1), 2022-01-27
Supplement: Supplementary file 8 [file 931dd217e8f6f5587c175e7c.xlsx]

## Sheet: Sheet1
Name	Algorithm	Polarity	m/z	m/z (prod.)	collision voltage
NADPH	MRM	Positive	746.1	136.1	45
NADP	MRM	Positive	744.1	136.1	40
NAD	MRM	Positive	666.1	649.1	15
NADH	MRM	Positive	666	136.1	50
Fructose-1,6-sphosphate	MRM	Positive	341	323	15
Glutathione	MRM	Positive	308.09	178.4	8
Argininosuccinate	MRM	Positive	291.1	116.1	20
Inosine	MRM	Positive	269.1	110	10
Glucose-1-phosphate	MRM	Positive	261.1	243	20
Glucose-6-phosphate	MRM	Positive	261.1	181	10
Fructose1phosphate	MRM	Positive	261	207	10
Sn-Glycero-3-Phosphocholine	MRM	Positive	259.2	125	27
Cystine	MRM	Positive	241.3	120	18
Tryptophan	MRM	Positive	205.1	146.1	18
Acetyl-Carnitine	MRM	Positive	204.1	60.1	25
Citrate	MRM	Positive	193	87	12
Isocitrate	MRM	Positive	193	73	25
Oxalosuccinate	MRM	Positive	191	127	15
3-Phosphoglycerate	MRM	Positive	187	59.8	65
Phosphocholine	MRM	Positive	184.1	86.2	20
Tyrosine	MRM	Positive	182	91	29
Myo-Inositol	MRM	Positive	181.07	133.3	15
Glucose	MRM	Positive	181	99	25
Citrulline	MRM	Positive	176.1	113.1	15
Aconinate	MRM	Positive	175	70.1	24
Arginine	MRM	Positive	175	60.1	15
Glycerol-phosphate	MRM	Positive	173	99	20
Glyceraldehyde-3-phosphate	MRM	Positive	171	99	20
3-Methylhistidine	MRM	Positive	170.1	96	25
Phosphoenolpyruvate	MRM	Positive	169	151	10
Phenylalanine	MRM	Positive	166	120	10
Carnitine	MRM	Positive	162.1	60.1	20
Histidine	MRM	Positive	156	83.1	30
Methionine	MRM	Positive	150.1	56.1	12
2-Hydroxyglutarate	MRM	Positive	149.1	57	20
Glutamate	MRM	Positive	148.1	84.1	20
Lysine	MRM	Positive	147.11	84.1	12
Glutamine	MRM	Positive	147.1	130	10
Keto-glutarate	MRM	Positive	147.03	113	32
Tryptamine	MRM	Positive	144	117	16
Malate	MRM	Positive	135.03	117.02	12
Aspartate	MRM	Positive	134	74	10
Asparagine	MRM	Positive	133.1	116.1	12
Ornithine	MRM	Positive	133.1	84	25
Oxalactate	MRM	Positive	133.1	86.9	9
Iso-leucine	MRM	Positive	132	69.1	16
Leucine	MRM	Positive	132	43.3	12
Taurine	MRM	Positive	126.1	65.1	20
Cysteine	MRM	Positive	122	76.1	12
Threonine	MRM	Positive	120.1	102.1	10
Succinate	MRM	Positive	119	73	20
Valine	MRM	Positive	118	72	15
Fumarate	MRM	Positive	117.1	71	10
Proline	MRM	Positive	116	70.1	16
Creatinine	MRM	Positive	114.1	43	10
Histamine	MRM	Positive	112.2	83	15
Glycerate	MRM	Positive	107	79	12
Serine	MRM	Positive	106.1	60.1	30
Choline	MRM	Positive	105.1	64.1	36
3-Hydroxybutyrate	MRM	Positive	105	69	10
Acetoacetate	MRM	Positive	103	41	15
Lactate	MRM	Positive	91	45	15
Alanine	MRM	Positive	90.1	45.2	10
Pyruvate	MRM	Positive	89.03	55	49
Glycine	MRM	Positive	76	48.3	13
Glyoxylate	MRM	Positive	75	45	20
