# Supplementary material for: Oncometabolite D-2-hydroxyglutarate - dependent metabolic reprogramming induces skeletal muscle atrophy during cancer cachexia
Source: Research Square preprint supplement (doi:10.21203/rs.3.rs-1246702/v1), 2022-01-27
Supplement: Supplementary file 9 [file cd1c04eef9302991b2c5e7b4.xls]

## Sheet: volcano G D2HG+D2hgdh vs D2hgdh
GeneID	Length	D2hgdh-Expression	D2_HG-D2hgdh-Expression	log2FoldChange(D2_HG-D2hgdh/D2hgdh)	Pvalue	Padj	Up/Down-Regulation(D2_HG-D2hgdh/D2hgdh)	SYMBOL	ENTREZID	GENENAME	UNIPROT	KEGG_ANNOT	KEGG_pathway	GO_MF	GO_BP	GO_CC
ENSMUSG00000000028	2143	249.462	125.925	-0.988722	4.17451e-06	0.000115239	Down	Cdc45	12544	cell division cycle 45	Q3UI99	K06628 CDC45; cell division control protein 45	mmu04110:Cell cycle;	GO:0003682;GO:0003688;GO:0003697;GO:0043138;GO:0003682;GO:0003688;GO:0003697;GO:0043138;GO:0003682;GO:0003688;GO:0003697;GO:0043138;	GO:0000727;GO:0006260;GO:0006270;GO:0007049;GO:0031938;GO:1900087;GO:1902977;GO:0000727;GO:0006260;GO:0006270;GO:0007049;GO:0031938;GO:1900087;GO:1902977;GO:0000727;GO:0006260;GO:0006270;GO:0007049;GO:0031938;GO:1900087;GO:1902977;	GO:0005634;GO:0005656;GO:0005813;GO:0031261;GO:0031298;GO:0005634;GO:0005656;GO:0005813;GO:0031261;GO:0031298;GO:0005634;GO:0005656;GO:0005813;GO:0031261;GO:0031298;
ENSMUSG00000000440	2125	179.953	399.539	1.14933	2.50144e-10	1.63163e-08	Up	Pparg	19016	peroxisome proliferator activated receptor gamma	Q6GU14	K08530 NR1C3; peroxisome proliferator-activated receptor gamma	mmu03320:PPAR signaling pathway;mmu04152:AMPK signaling pathway;mmu04211:Longevity regulating pathway;mmu04380:Osteoclast differentiation;mmu04714:Thermogenesis;mmu05016:Huntington disease;mmu05200:Pathways in cancer;mmu05202:Transcriptional misregulation in cancer;mmu05216:Thyroid cancer;	GO:0000976;GO:0000977;GO:0000981;GO:0001012;GO:0001103;GO:0001227;GO:0001228;GO:0003677;GO:0003677;GO:0003677;GO:0003682;GO:0003690;GO:0003700;GO:0003700;GO:0003707;GO:0004879;GO:0004879;GO:0005504;GO:0005515;GO:0008022;GO:0008134;GO:0008134;GO:0008144;GO:0008144;GO:0008270;GO:0008289;GO:0019899;GO:0019903;GO:0030331;GO:0030374;GO:0030374;GO:0030374;GO:0033613;GO:0038023;GO:0042277;GO:0042802;GO:…	GO:0000122;GO:0000122;GO:0000122;GO:0001818;GO:0001890;GO:0002021;GO:0002024;GO:0002674;GO:0006355;GO:0006357;GO:0006357;GO:0006631;GO:0006919;GO:0006954;GO:0007165;GO:0007275;GO:0008217;GO:0008285;GO:0008285;GO:0009416;GO:0009755;GO:0010468;GO:0010742;GO:0010745;GO:0010871;GO:0010887;GO:0010887;GO:0010891;GO:0015909;GO:0016525;GO:0019216;GO:0019216;GO:0019395;GO:0030154;GO:0030224;GO:0030308;GO:…	GO:0005634;GO:0005634;GO:0005634;GO:0005737;GO:0005829;GO:0005829;GO:0032991;GO:0043231;GO:0048471;GO:0090575;GO:0090575;GO:0005634;GO:0005634;GO:0005634;GO:0005737;GO:0005829;GO:0005829;GO:0032991;GO:0043231;GO:0048471;GO:0090575;GO:0090575;GO:0005634;GO:0005634;GO:0005634;GO:0005737;GO:0005829;GO:0005829;GO:0032991;GO:0043231;GO:0048471;GO:0090575;GO:0090575;
ENSMUSG00000000627	4086	72.2524	136.864	0.921867	0.000347466	0.00548946	Up	Sema4f	20355	sema domain, immunoglobulin domain (Ig), TM domain, and short cytoplasmic domain	Q9Z123	K06521 SEMA4; semaphorin 4	mmu04360:Axon guidance;	GO:0005515;GO:0030215;GO:0038191;GO:0045499;	GO:0001755;GO:0007275;GO:0007399;GO:0007411;GO:0007411;GO:0030154;GO:0030335;GO:0030517;GO:0031290;GO:0048843;GO:0050919;GO:0071526;	GO:0005615;GO:0005783;GO:0005886;GO:0005886;GO:0005887;GO:0016020;GO:0016021;GO:0045202;GO:0045211;
ENSMUSG00000000794	8314	1728.45	926.998	-0.899252	3.5961e-19	5.57438e-17	Down	Kcnn3	140493	potassium intermediate/small conductance calcium-activated channel, subfamily N, member 3	P58391	K04944 KCNN3; potassium intermediate/small conductance calcium-activated channel subfamily N member 3	mmu04911:Insulin secretion;mmu04929:GnRH secretion;	GO:0005516;GO:0015269;GO:0016286;GO:0016286;GO:0046982;	GO:0006811;GO:0006813;GO:0071805;	GO:0005737;GO:0005886;GO:0005886;GO:0005886;GO:0016020;GO:0016021;GO:0030175;GO:0031594;GO:0043005;GO:0043005;GO:0043025;GO:0043025;GO:0044297;
ENSMUSG00000000957	3238	41619.6	23437.7	-0.828425	2.60273e-38	1.31898e-35	Down	Mmp14	17387	matrix metallopeptidase 14 (membrane-inserted)	P53690	K07763 MMP14; matrix metalloproteinase-14 (membrane-inserted) [EC:3.4.24.80]	mmu04668:TNF signaling pathway;mmu04912:GnRH signaling pathway;mmu04928:Parathyroid hormone synthesis, secretion and action;	GO:0004175;GO:0004222;GO:0004222;GO:0004222;GO:0005178;GO:0008233;GO:0008237;GO:0008270;GO:0016787;GO:0046872;GO:0070006;	GO:0001501;GO:0001503;GO:0001958;GO:0006508;GO:0009725;GO:0010831;GO:0010954;GO:0016477;GO:0030198;GO:0030307;GO:0030324;GO:0030335;GO:0030574;GO:0030574;GO:0031638;GO:0031638;GO:0031638;GO:0035988;GO:0045579;GO:0045746;GO:0048701;GO:0048754;GO:0048771;GO:0051895;GO:0060322;GO:0060348;GO:0097094;GO:1903076;GO:1905523;	GO:0005615;GO:0005615;GO:0005634;GO:0005737;GO:0005829;GO:0005886;GO:0016020;GO:0016021;GO:0031012;GO:0031410;GO:0044354;GO:0045111;
ENSMUSG00000001053	2367	161.535	71.2173	-1.18404	1.02284e-05	0.000257193	Down	N4bp3	212706	NEDD4 binding protein 3	Q8C7U1	NA	NA	GO:0005515;	GO:0007275;GO:0007399;GO:0008150;	GO:0031410;GO:0031410;GO:0042995;
ENSMUSG00000001228	3586	461.979	237.377	-0.962154	6.13269e-10	3.59284e-08	Down	Uhrf1	18140	ubiquitin-like, containing PHD and RING finger domains, 1	Q8VDF2	K10638 UHRF1; E3 ubiquitin-protein ligase UHRF1 [EC:2.3.2.27]	NA	GO:0000987;GO:0003677;GO:0004842;GO:0005515;GO:0008270;GO:0008327;GO:0016740;GO:0031493;GO:0035064;GO:0035064;GO:0042393;GO:0042802;GO:0044729;GO:0044729;GO:0046872;GO:0061630;GO:0061630;	GO:0000122;GO:0000122;GO:0006281;GO:0006325;GO:0006511;GO:0006974;GO:0007049;GO:0010216;GO:0010216;GO:0010216;GO:0010390;GO:0010390;GO:0016567;GO:0016574;GO:0032270;GO:0050678;GO:0051865;GO:0051865;	GO:0000790;GO:0000790;GO:0000791;GO:0000792;GO:0000792;GO:0005634;GO:0005634;GO:0005634;GO:0005657;GO:0005657;GO:0005720;GO:0005720;GO:0005886;GO:0016363;GO:0031410;
ENSMUSG00000001349	2381	57.2188	17.5039	-1.70087	0.000156904	0.00281659	Down	Cnn1	12797	calponin 1	Q8CBQ2	NA	NA	GO:0003779;GO:0005516;GO:0003779;GO:0005516;GO:0003779;GO:0005516;	GO:0031032;GO:1904706;GO:0031032;GO:1904706;GO:0031032;GO:1904706;	GO:0005856;GO:0005856;GO:0005856;
ENSMUSG00000001436	2863	210.834	317.281	0.587866	0.00353075	0.0365221	Up	Slc19a1	20509	solute carrier family 19 (folate transporter), member 1	Q542F3	K14609 SLC19A1; solute carrier family 19 (folate transporter), member 1	mmu01523:Antifolate resistance;mmu04977:Vitamin digestion and absorption;	GO:0005542;GO:0005542;GO:0008517;GO:0008517;GO:0008518;GO:0008518;GO:0015350;GO:0090482;GO:0005542;GO:0005542;GO:0008517;GO:0008517;GO:0008518;GO:0008518;GO:0015350;GO:0090482;	GO:0015884;GO:0051180;GO:0051958;GO:0055085;GO:0098838;GO:1904447;GO:0015884;GO:0051180;GO:0051958;GO:0055085;GO:0098838;GO:1904447;	GO:0005886;GO:0005886;GO:0005887;GO:0016020;GO:0016021;GO:0016323;GO:0016323;GO:0016324;GO:0016324;GO:0016324;GO:0031526;GO:0005886;GO:0005886;GO:0005887;GO:0016020;GO:0016021;GO:0016323;GO:0016323;GO:0016324;GO:0016324;GO:0016324;GO:0031526;
ENSMUSG00000001473	1758	10468.5	6892.21	-0.603063	7.36548e-14	6.69293e-12	Down	Tubb6	67951	tubulin, beta 6 class V	Q922F4	K07375 TUBB; tubulin beta	mmu04145:Phagosome;mmu04540:Gap junction;	GO:0000166;GO:0003924;GO:0005200;GO:0005525;GO:0000166;GO:0003924;GO:0005200;GO:0005525;	GO:0000226;GO:0000278;GO:0007017;GO:0000226;GO:0000278;GO:0007017;	GO:0005737;GO:0005856;GO:0005874;GO:0005874;GO:0005737;GO:0005856;GO:0005874;GO:0005874;
ENSMUSG00000001510	2607	176.059	297.612	0.756299	2.99201e-05	0.000670455	Up	Dlx3	13393	distal-less homeobox 3	Q78ZZ8	K09315 DLX3; homeobox protein DLX3	NA	GO:0000978;GO:0001228;GO:0003677;GO:0003682;GO:0003700;GO:0043565;GO:0000978;GO:0001228;GO:0003677;GO:0003682;GO:0003700;GO:0043565;	GO:0001568;GO:0001890;GO:0006355;GO:0006357;GO:0007275;GO:0030154;GO:0030855;GO:0042475;GO:0071895;GO:0001568;GO:0001890;GO:0006355;GO:0006357;GO:0007275;GO:0030154;GO:0030855;GO:0042475;GO:0071895;	GO:0005634;GO:0005634;GO:0005634;GO:0005634;
ENSMUSG00000001517	4652	492.811	205.984	-1.25957	5.68693e-05	0.00117447	Down	Foxm1	14235	forkhead box M1	Q6P1H7	K09406 FOXM; forkhead box protein M	mmu04218:Cellular senescence;	GO:0000977;GO:0003677;GO:0003677;GO:0003700;GO:0003700;GO:0005515;GO:0019901;GO:0043565;GO:0044212;	GO:0000086;GO:0000122;GO:0001570;GO:0001889;GO:0006281;GO:0006355;GO:0006366;GO:0006974;GO:0006978;GO:0006978;GO:0007049;GO:0008284;GO:0008284;GO:0032873;GO:0042127;GO:0045892;GO:0045893;GO:0045893;GO:0045944;GO:0045944;GO:0046578;GO:0071156;GO:0090344;GO:2000377;GO:2000781;GO:2000781;	GO:0005634;
ENSMUSG00000001739	1902	7.15567	41.2673	2.5315	2.23798e-05	0.000520065	Up	Cldn15	60363	claudin 15	Q9Z0S5	K06087 CLDN; claudin	mmu04514:Cell adhesion molecules (CAMs);mmu04530:Tight junction;mmu04670:Leukocyte transendothelial migration;mmu05160:Hepatitis C;	GO:0005198;	GO:0006811;	GO:0005886;GO:0005923;GO:0016020;GO:0016021;GO:0016328;GO:0030054;
ENSMUSG00000001918	2807	324.586	614.247	0.919497	4.85478e-12	3.80753e-10	Up	Slc1a5	20514	solute carrier family 1 (neutral amino acid transporter), member 5	Q9ESU7	K05616 SLC1A5; solute carrier family 1 (neutral amino acid transporter), member 5	mmu04974:Protein digestion and absorption;mmu05230:Central carbon metabolism in cancer;	GO:0015175;GO:0015186;GO:0015194;GO:0015293;GO:0046872;GO:0015175;GO:0015186;GO:0015194;GO:0015293;GO:0046872;	GO:0006865;GO:0006868;GO:0010585;GO:0015825;GO:0070207;GO:1903803;GO:0006865;GO:0006868;GO:0010585;GO:0015825;GO:0070207;GO:1903803;	GO:0005886;GO:0016020;GO:0016021;GO:0005886;GO:0016020;GO:0016021;
ENSMUSG00000002007	2711	423.117	274.115	-0.625866	4.30391e-05	0.000916127	Down	Srpk3	56504	serine/arginine-rich protein specific kinase 3	Q9Z0G2	K08832 SRPK3; serine/threonine-protein kinase SRPK3 [EC:2.7.11.1]	NA	GO:0000166;GO:0004672;GO:0004674;GO:0004674;GO:0005524;GO:0016301;GO:0016740;GO:0000166;GO:0004672;GO:0004674;GO:0004674;GO:0005524;GO:0016301;GO:0016740;	GO:0000245;GO:0006468;GO:0007275;GO:0007517;GO:0007519;GO:0010468;GO:0016310;GO:0030154;GO:0035556;GO:0050684;GO:0060537;GO:0000245;GO:0006468;GO:0007275;GO:0007517;GO:0007519;GO:0010468;GO:0016310;GO:0030154;GO:0035556;GO:0050684;GO:0060537;	GO:0005634;GO:0005737;GO:0005634;GO:0005737;
ENSMUSG00000002289	3308	385.521	8137.31	4.39894	1.41551e-266	1.86507e-262	Up	Angptl4	57875	angiopoietin-like 4	Q9Z1P8	K08767 ANGPTL4; angiopoietin-like 4	mmu03320:PPAR signaling pathway;mmu04979:Cholesterol metabolism;	GO:0004857;GO:0042802;	GO:0001525;GO:0009267;GO:0043066;GO:0043066;GO:0045834;GO:0051005;GO:0051005;GO:0051260;GO:0070328;GO:2000352;	GO:0005576;GO:0005576;GO:0005615;GO:0005615;
ENSMUSG00000002346	3657	232.723	485.264	1.05939	2.21458e-11	1.60326e-09	Up	Slc25a42	73095	solute carrier family 25, member 42	Q8R0Y8	K15085 SLC25A42; solute carrier family 25, member 42	NA	GO:0005347;GO:0015217;GO:0015228;GO:0022857;GO:0043262;GO:0080122;	GO:0015866;GO:0015867;GO:0035349;GO:0055085;GO:0080121;	GO:0005739;GO:0005739;GO:0005743;GO:0016020;GO:0016021;
ENSMUSG00000002870	3494	959.448	596.189	-0.685317	8.19783e-08	3.26328e-06	Down	Mcm2	17216	minichromosome maintenance complex component 2	P97310	K02540 MCM2; DNA replication licensing factor MCM2 [EC:3.6.4.12]	mmu03030:DNA replication;mmu04110:Cell cycle;	GO:0000166;GO:0003677;GO:0003688;GO:0003688;GO:0003697;GO:0004386;GO:0005524;GO:0016787;GO:0017116;GO:0019899;GO:0042393;GO:0043138;GO:0046872;	GO:0000727;GO:0006260;GO:0006267;GO:0006268;GO:0006268;GO:0006270;GO:0006270;GO:0006334;GO:0006915;GO:0007049;GO:0071353;GO:0090102;GO:1902975;GO:1905775;	GO:0000785;GO:0005634;GO:0005634;GO:0005634;GO:0005654;GO:0005664;GO:0005737;GO:0015630;GO:0042555;GO:0042555;
ENSMUSG00000002985	1408	616.551	371.208	-0.730563	0.000140727	0.00256463	Down	Apoe	11816	apolipoprotein E	Q3TXU4	K04524 APOE; apolipoprotein E	mmu04979:Cholesterol metabolism;mmu05010:Alzheimer disease;	GO:0001540;GO:0001540;GO:0005102;GO:0005319;GO:0005515;GO:0005543;GO:0005543;GO:0008201;GO:0008289;GO:0015485;GO:0016209;GO:0017127;GO:0017127;GO:0042802;GO:0042803;GO:0043395;GO:0043395;GO:0044877;GO:0046848;GO:0046911;GO:0046983;GO:0048156;GO:0050750;GO:0050750;GO:0060228;GO:0060228;GO:0060228;GO:0070326;GO:0070326;GO:0071813;GO:0001540;GO:0001540;GO:0005102;GO:0005319;GO:0005515;GO:0005543;GO:…	GO:0001937;GO:0002021;GO:0006629;GO:0006641;GO:0006695;GO:0006707;GO:0006707;GO:0006869;GO:0006874;GO:0006898;GO:0006979;GO:0007186;GO:0007263;GO:0007568;GO:0007616;GO:0008203;GO:0008203;GO:0010468;GO:0010544;GO:0010596;GO:0010629;GO:0010873;GO:0010873;GO:0010873;GO:0010875;GO:0010877;GO:0010976;GO:0010976;GO:0010977;GO:0015909;GO:0017038;GO:0019068;GO:0019433;GO:0019934;GO:0030195;GO:0031175;GO:…	GO:0005576;GO:0005615;GO:0005615;GO:0005635;GO:0005737;GO:0005764;GO:0005768;GO:0005769;GO:0005770;GO:0005783;GO:0005794;GO:0005874;GO:0005886;GO:0009986;GO:0030425;GO:0031012;GO:0031232;GO:0034361;GO:0034362;GO:0034362;GO:0034363;GO:0034363;GO:0034364;GO:0034364;GO:0034365;GO:0042627;GO:0042627;GO:0043025;GO:0043083;GO:0045202;GO:0098978;GO:0098978;GO:0098978;GO:1990777;GO:0005576;GO:0005615;GO:…
ENSMUSG00000003123	3713	320.554	636.471	0.989128	2.69664e-11	1.94158e-09	Up	Lipe	16890	lipase, hormone sensitive	P54310	K07188 LIPE; hormone-sensitive lipase [EC:3.1.1.79]	mmu04024:cAMP signaling pathway;mmu04152:AMPK signaling pathway;mmu04371:Apelin signaling pathway;mmu04714:Thermogenesis;mmu04910:Insulin signaling pathway;mmu04923:Regulation of lipolysis in adipocytes;mmu04925:Aldosterone synthesis and secretion;	GO:0004806;GO:0005515;GO:0016298;GO:0016787;GO:0016788;GO:0017171;GO:0019901;GO:0033878;GO:0042134;GO:0047372;	GO:0006361;GO:0006363;GO:0006629;GO:0008202;GO:0008203;GO:0016042;GO:0019433;GO:0019433;GO:0019433;GO:0042758;GO:0046340;GO:0046340;	GO:0005615;GO:0005634;GO:0005737;GO:0005737;GO:0005739;GO:0005811;GO:0005829;GO:0005829;GO:0005886;GO:0005901;GO:0016020;
ENSMUSG00000003865	3678	3348.4	2082.35	-0.685146	3.32189e-20	5.61143e-18	Down	Gys1	14936	glycogen synthase 1, muscle	Q9Z1E4	K00693 GYS; glycogen synthase [EC:2.4.1.11]	mmu00500:Starch and sucrose metabolism;mmu01100:Metabolic pathways;mmu04151:PI3K-Akt signaling pathway;mmu04152:AMPK signaling pathway;mmu04910:Insulin signaling pathway;mmu04922:Glucagon signaling pathway;mmu04931:Insulin resistance;	GO:0003824;GO:0004373;GO:0004373;GO:0004373;GO:0005515;GO:0005536;GO:0016740;GO:0016757;GO:0019901;GO:0061547;	GO:0005977;GO:0005978;GO:0005978;GO:0005978;GO:0007507;GO:0008152;	GO:0005737;GO:0005737;GO:0016234;
ENSMUSG00000003949	5642	478.634	242.987	-0.978807	8.19005e-08	3.26328e-06	Down	Hlf	217082	hepatic leukemia factor	Q8BW74	K09057 HLF; hepatic leukemia factor	NA	GO:0000977;GO:0001228;GO:0003677;GO:0003700;GO:0043565;	GO:0006355;GO:0006357;GO:0035914;GO:0045944;GO:0048511;	GO:0005634;GO:0005634;
ENSMUSG00000004558	2103	292.571	510.937	0.804319	3.41136e-09	1.74217e-07	Up	Ndrg2	29811	N-myc downstream regulated gene 2	Q9QYG0	NA	NA	NA	GO:0001818;GO:0007165;GO:0007165;GO:0007275;GO:0007399;GO:0010574;GO:0016055;GO:0030154;GO:0048662;GO:0070373;GO:0090361;GO:0099173;	GO:0005634;GO:0005737;GO:0005737;GO:0005794;GO:0042995;GO:0098978;
ENSMUSG00000005045	9486	16.986	50.2581	1.56429	0.00102314	0.0133633	Up	Chd5	269610	chromodomain helicase DNA binding protein 5	A2A8L1	K14435 CHD5; chromodomain-helicase-DNA-binding protein 5 [EC:3.6.4.12]	NA	GO:0000166;GO:0003677;GO:0003682;GO:0004386;GO:0005515;GO:0005524;GO:0016787;GO:0042826;GO:0046872;GO:0061628;GO:0061628;GO:0000166;GO:0003677;GO:0003682;GO:0004386;GO:0005515;GO:0005524;GO:0016787;GO:0042826;GO:0046872;GO:0061628;GO:0061628;GO:0000166;GO:0003677;GO:0003682;GO:0004386;GO:0005515;GO:0005524;GO:0016787;GO:0042826;GO:0046872;GO:0061628;GO:0061628;	GO:0006325;GO:0006366;GO:0007283;GO:0007399;GO:0008285;GO:0021895;GO:0030154;GO:0035093;GO:0043967;GO:0045595;GO:0060850;GO:0060850;GO:0098532;GO:1901798;GO:0006325;GO:0006366;GO:0007283;GO:0007399;GO:0008285;GO:0021895;GO:0030154;GO:0035093;GO:0043967;GO:0045595;GO:0060850;GO:0060850;GO:0098532;GO:1901798;GO:0006325;GO:0006366;GO:0007283;GO:0007399;GO:0008285;GO:0021895;GO:0030154;GO:0035093;GO:…	GO:0000785;GO:0000792;GO:0005634;GO:0005634;GO:0005654;GO:0005829;GO:0016581;GO:0016607;GO:0000785;GO:0000792;GO:0005634;GO:0005634;GO:0005654;GO:0005829;GO:0016581;GO:0016607;GO:0000785;GO:0000792;GO:0005634;GO:0005634;GO:0005654;GO:0005829;GO:0016581;GO:0016607;
ENSMUSG00000005233	1869	305.928	187.05	-0.708744	0.000781351	0.0106685	Down	Spc25	66442	SPC25, NDC80 kinetochore complex component, homolog (S. cerevisiae)	Q3UA16	K11550 SPBC25; kinetochore protein Spc25, animal type	NA	GO:0003674;	GO:0007049;GO:0007052;GO:0007059;GO:0007059;GO:0051301;	GO:0000775;GO:0000776;GO:0000777;GO:0000777;GO:0005634;GO:0005694;GO:0005829;GO:0031262;GO:0031262;
ENSMUSG00000005410	3381	499.466	193.929	-1.36842	1.82853e-13	1.60618e-11	Down	Mcm5	17218	minichromosome maintenance complex component 5	Q8BQ03	K02209 MCM5; DNA replication licensing factor MCM5 [EC:3.6.4.12]	mmu03030:DNA replication;mmu04110:Cell cycle;	GO:0000166;GO:0003677;GO:0003688;GO:0003688;GO:0003697;GO:0004386;GO:0005524;GO:0016787;GO:0017116;GO:0043138;GO:0000166;GO:0003677;GO:0003688;GO:0003688;GO:0003697;GO:0004386;GO:0005524;GO:0016787;GO:0017116;GO:0043138;	GO:0000727;GO:0006260;GO:0006267;GO:0006270;GO:0006270;GO:0007049;GO:0000727;GO:0006260;GO:0006267;GO:0006270;GO:0006270;GO:0007049;	GO:0005634;GO:0005634;GO:0005654;GO:0005737;GO:0042555;GO:0042555;GO:0005634;GO:0005634;GO:0005654;GO:0005737;GO:0042555;GO:0042555;
ENSMUSG00000005470	1788	385.673	214.917	-0.844399	0.000116749	0.00217579	Down	Asf1b	66929	anti-silencing function 1B histone chaperone	Q9DAP7	K10753 ASF1; histone chaperone ASF1	NA	GO:0042393;	GO:0001835;GO:0006325;GO:0006333;GO:0006334;GO:0006335;GO:0006336;	GO:0000785;GO:0000790;GO:0005634;GO:0005654;GO:0032991;
ENSMUSG00000005667	2085	965.948	2292.09	1.24646	2.72963e-27	8.17401e-25	Up	Mthfd2	17768	methylenetetrahydrofolate dehydrogenase (NAD+ dependent), methenyltetrahydrofolate cyclohydrolase	P18155	K13403 MTHFD2; methylenetetrahydrofolate dehydrogenase(NAD+) / 5,10-methenyltetrahydrofolate cyclohydrolase [EC:1.5.1.15 3.5.4.9]	mmu00670:One carbon pool by folate;mmu01100:Metabolic pathways;	GO:0000287;GO:0003824;GO:0004477;GO:0004487;GO:0004487;GO:0004488;GO:0004488;GO:0016491;GO:0016787;GO:0042301;	GO:0006730;GO:0008152;GO:0035999;GO:0046653;GO:0046653;GO:0055114;	GO:0005739;
ENSMUSG00000005716	977	171.777	43.8496	-1.97147	2.9383e-09	1.52174e-07	Down	Pvalb	19293	parvalbumin	Q545M7	NA	NA	GO:0005509;GO:0005509;GO:0042803;GO:0046872;GO:0046982;GO:0005509;GO:0005509;GO:0042803;GO:0046872;GO:0046982;	NA	GO:0005634;GO:0005634;GO:0005737;GO:0005737;GO:0005737;GO:0030424;GO:0032420;GO:0032437;GO:0032991;GO:0043025;GO:0005634;GO:0005634;GO:0005737;GO:0005737;GO:0005737;GO:0030424;GO:0032420;GO:0032437;GO:0032991;GO:0043025;
ENSMUSG00000005800	2425	296.782	41.7951	-2.82844	8.41845e-33	3.57811e-30	Down	Mmp8	17394	matrix metallopeptidase 8	O70138	K01402 MMP8; matrix metalloproteinase-8 (neutrophil collagenase) [EC:3.4.24.34]	NA	GO:0004175;GO:0004222;GO:0004252;GO:0005509;GO:0008233;GO:0008237;GO:0008270;GO:0016787;GO:0046872;	GO:0006508;GO:0010628;GO:0010629;GO:0030198;GO:0030574;GO:0032693;GO:0032755;GO:0043388;GO:0043410;GO:0045429;GO:0045429;GO:0046330;GO:0150078;GO:0150078;GO:1901224;GO:1903428;GO:1903980;GO:1904469;GO:1904469;	GO:0005576;GO:0005615;GO:0005615;GO:0005615;GO:0031012;
ENSMUSG00000006403	4389	4248.64	1733.05	-1.29416	2.10241e-19	3.29777e-17	Down	Adamts4	240913	a disintegrin-like and metallopeptidase (reprolysin type) with thrombospondin type 1 motif, 4	Q8BNJ2	K07764 ADAMTS4; a disintegrin and metalloproteinase with thrombospondin motifs 4 [EC:3.4.24.82]	NA	GO:0002020;GO:0004222;GO:0005515;GO:0008233;GO:0008237;GO:0016787;GO:0046872;GO:0002020;GO:0004222;GO:0005515;GO:0008233;GO:0008237;GO:0016787;GO:0046872;	GO:0006508;GO:0042742;GO:0006508;GO:0042742;	GO:0005576;GO:0005615;GO:0016607;GO:0062023;GO:0005576;GO:0005615;GO:0016607;GO:0062023;
ENSMUSG00000006517	1833	1529.74	2816.19	0.880142	1.32177e-20	2.32208e-18	Up	Mvd	192156	mevalonate (diphospho) decarboxylase	Q99JF5	K01597 MVD; diphosphomevalonate decarboxylase [EC:4.1.1.33]	mmu00900:Terpenoid backbone biosynthesis;mmu01100:Metabolic pathways;	GO:0000166;GO:0004163;GO:0004163;GO:0005524;GO:0016829;GO:0016831;GO:0030544;GO:0042803;GO:0000166;GO:0004163;GO:0004163;GO:0005524;GO:0016829;GO:0016831;GO:0030544;GO:0042803;	GO:0006629;GO:0006694;GO:0006695;GO:0008202;GO:0008203;GO:0008284;GO:0008299;GO:0016126;GO:0019287;GO:0019287;GO:0006629;GO:0006694;GO:0006695;GO:0008202;GO:0008203;GO:0008284;GO:0008299;GO:0016126;GO:0019287;GO:0019287;	GO:0005777;GO:0005782;GO:0005829;GO:0005829;GO:0005777;GO:0005782;GO:0005829;GO:0005829;
ENSMUSG00000006542	2832	1086.46	537.453	-1.01713	6.47512e-17	7.97347e-15	Down	Prkag3	241113	protein kinase, AMP-activated, gamma 3 non-catalytic subunit	Q8BGM7	K07200 PRKAG; 5'-AMP-activated protein kinase, regulatory gamma subunit	mmu04068:FoxO signaling pathway;mmu04152:AMPK signaling pathway;mmu04211:Longevity regulating pathway;mmu04213:Longevity regulating pathway - multiple species;mmu04371:Apelin signaling pathway;mmu04530:Tight junction;mmu04710:Circadian rhythm;mmu04714:Thermogenesis;mmu04910:Insulin signaling pathway;mmu04920:Adipocytokine signaling pathway;mmu04921:Oxytocin signaling pathway;mmu04922:Glucagon sig…	GO:0000166;GO:0004679;GO:0004679;GO:0005524;GO:0019901;GO:0032559;	GO:0005978;GO:0006096;GO:0006629;GO:0006631;GO:0006633;GO:0014873;GO:0071900;	GO:0031588;
ENSMUSG00000007080	7163	294.414	126.718	-1.2165	1.21774e-11	9.16851e-10	Down	Pole	18973	polymerase (DNA directed), epsilon	Q9WVF7	K02324 POLE; DNA polymerase epsilon subunit 1 [EC:2.7.7.7]	mmu03030:DNA replication;mmu03410:Base excision repair;mmu03420:Nucleotide excision repair;	GO:0000166;GO:0003676;GO:0003677;GO:0003677;GO:0003682;GO:0003887;GO:0003887;GO:0008270;GO:0008310;GO:0016740;GO:0016779;GO:0046872;GO:0051536;GO:0051539;GO:0000166;GO:0003676;GO:0003677;GO:0003677;GO:0003682;GO:0003887;GO:0003887;GO:0008270;GO:0008310;GO:0016740;GO:0016779;GO:0046872;GO:0051536;GO:0051539;GO:0000166;GO:0003676;GO:0003677;GO:0003677;GO:0003682;GO:0003887;GO:0003887;GO:0008270;GO:…	GO:0000082;GO:0000278;GO:0000731;GO:0006260;GO:0006272;GO:0006281;GO:0006287;GO:0006287;GO:0006297;GO:0006297;GO:0006974;GO:0045004;GO:0071897;GO:0000082;GO:0000278;GO:0000731;GO:0006260;GO:0006272;GO:0006281;GO:0006287;GO:0006287;GO:0006297;GO:0006297;GO:0006974;GO:0045004;GO:0071897;GO:0000082;GO:0000278;GO:0000731;GO:0006260;GO:0006272;GO:0006281;GO:0006287;GO:0006287;GO:0006297;GO:0006297;GO:…	GO:0005634;GO:0005654;GO:0005886;GO:0008622;GO:0008622;GO:0005634;GO:0005654;GO:0005886;GO:0008622;GO:0008622;GO:0005634;GO:0005654;GO:0005886;GO:0008622;GO:0008622;
ENSMUSG00000008540	1167	1233.62	1881.71	0.608652	1.98651e-08	8.75393e-07	Up	Mgst1	56615	microsomal glutathione S-transferase 1	Q91VS7	K00799 GST; glutathione S-transferase [EC:2.5.1.18]	mmu00480:Glutathione metabolism;mmu00980:Metabolism of xenobiotics by cytochrome P450;mmu00982:Drug metabolism - cytochrome P450;mmu00983:Drug metabolism - other enzymes;mmu01100:Metabolic pathways;mmu01524:Platinum drug resistance;mmu05200:Pathways in cancer;mmu05204:Chemical carcinogenesis;mmu05225:Hepatocellular carcinoma;mmu05418:Fluid shear stress and atherosclerosis;	GO:0004364;GO:0004364;GO:0004364;GO:0004602;GO:0016740;GO:0042802;GO:0042803;GO:0043295;GO:0004364;GO:0004364;GO:0004364;GO:0004602;GO:0016740;GO:0042802;GO:0042803;GO:0043295;GO:0004364;GO:0004364;GO:0004364;GO:0004602;GO:0016740;GO:0042802;GO:0042803;GO:0043295;	GO:0006749;GO:0006749;GO:0010243;GO:0032496;GO:0042493;GO:0055114;GO:0055114;GO:0070207;GO:0071449;GO:0006749;GO:0006749;GO:0010243;GO:0032496;GO:0042493;GO:0055114;GO:0055114;GO:0070207;GO:0071449;GO:0006749;GO:0006749;GO:0010243;GO:0032496;GO:0042493;GO:0055114;GO:0055114;GO:0070207;GO:0071449;	GO:0005634;GO:0005739;GO:0005739;GO:0005739;GO:0005741;GO:0005743;GO:0005778;GO:0005783;GO:0016020;GO:0016021;GO:0043231;GO:0045177;GO:0005634;GO:0005739;GO:0005739;GO:0005739;GO:0005741;GO:0005743;GO:0005778;GO:0005783;GO:0016020;GO:0016021;GO:0043231;GO:0045177;GO:0005634;GO:0005739;GO:0005739;GO:0005739;GO:0005741;GO:0005743;GO:0005778;GO:0005783;GO:0016020;GO:0016021;GO:0043231;GO:0045177;
ENSMUSG00000008822	735	131.082	210.984	0.685502	0.00345863	0.0360529	Up	Acyp1	66204	acylphosphatase 1, erythrocyte (common) type	Q8BMV3	K01512 acyP; acylphosphatase [EC:3.6.1.7]	mmu00620:Pyruvate metabolism;mmu01100:Metabolic pathways;	GO:0003998;GO:0016787;GO:0003998;GO:0016787;GO:0003998;GO:0016787;	GO:0008150;GO:0008150;GO:0008150;	NA
ENSMUSG00000009487	10043	449.308	222.531	-1.01615	1.40236e-08	6.37153e-07	Down	Otog	18419	otogelin	G3UWC8	NA	NA	GO:0005198;GO:0046556;	GO:0007605;GO:0008344;GO:0046373;	GO:0005576;GO:0005829;GO:0005886;GO:0016020;GO:0031012;
ENSMUSG00000010095	2813	2731.48	5583.32	1.0312	5.97106e-19	8.94031e-17	Up	Slc3a2	17254	solute carrier family 3 (activators of dibasic and neutral amino acid transport), member 2	A0A0U1RPK4	K06519 SLC3A2; solute carrier family 3, member 2	mmu04150:mTOR signaling pathway;mmu04216:Ferroptosis;mmu04974:Protein digestion and absorption;	GO:0003725;GO:0003824;GO:0005515;GO:0015175;GO:0003725;GO:0003824;GO:0005515;GO:0015175;	GO:0005975;GO:0006865;GO:0015804;GO:0043330;GO:1903801;GO:0005975;GO:0006865;GO:0015804;GO:0043330;GO:1903801;	GO:0005634;GO:0005829;GO:0005886;GO:0009986;GO:0016020;GO:0016021;GO:0045202;GO:0045202;GO:0005634;GO:0005829;GO:0005886;GO:0009986;GO:0016020;GO:0016021;GO:0045202;GO:0045202;
ENSMUSG00000011256	6383	6165.2	3665.17	-0.750011	4.83576e-22	9.65394e-20	Down	Adam19	11492	a disintegrin and metallopeptidase domain 19 (meltrin beta)	O35674	K08608 ADAM19; disintegrin and metalloproteinase domain-containing protein 19 [EC:3.4.24.-]	NA	GO:0004222;GO:0005515;GO:0008233;GO:0008237;GO:0016787;GO:0017124;GO:0046872;GO:0004222;GO:0005515;GO:0008233;GO:0008237;GO:0016787;GO:0017124;GO:0046872;GO:0004222;GO:0005515;GO:0008233;GO:0008237;GO:0016787;GO:0017124;GO:0046872;	GO:0006508;GO:0006509;GO:0006509;GO:0007507;GO:0010628;GO:2000049;GO:0006508;GO:0006509;GO:0006509;GO:0007507;GO:0010628;GO:2000049;GO:0006508;GO:0006509;GO:0006509;GO:0007507;GO:0010628;GO:2000049;	GO:0005634;GO:0005794;GO:0016020;GO:0016021;GO:0062023;GO:0005634;GO:0005794;GO:0016020;GO:0016021;GO:0062023;GO:0005634;GO:0005794;GO:0016020;GO:0016021;GO:0062023;
ENSMUSG00000012443	4819	610.666	384.951	-0.665088	1.85811e-05	0.000437969	Down	Kif11	16551	kinesin family member 11	Q6P9P6	K10398 KIF11; kinesin family member 11	NA	GO:0000166;GO:0003777;GO:0005524;GO:0008017;GO:0008574;GO:0016887;GO:0019901;	GO:0007018;GO:0007049;GO:0007051;GO:0007100;GO:0046602;GO:0051225;GO:0051301;GO:0090307;GO:0090307;	GO:0000922;GO:0005634;GO:0005737;GO:0005819;GO:0005829;GO:0005856;GO:0005871;GO:0005874;GO:0005874;GO:0005876;GO:0005876;GO:0032991;GO:0072686;
ENSMUSG00000013033	8181	2483.78	4146.22	0.739507	1.58496e-21	3.02659e-19	Up	Adgrl1	330814	adhesion G protein-coupled receptor L1	H7BX15	K04592 ADGRL1; adhesion G protein-coupled receptor L1	NA	GO:0004888;GO:0004930;GO:0004930;GO:0015643;GO:0016524;GO:0016524;GO:0030246;GO:0050839;GO:0004888;GO:0004930;GO:0004930;GO:0015643;GO:0016524;GO:0016524;GO:0030246;GO:0050839;	GO:0007157;GO:0007157;GO:0007165;GO:0007166;GO:0007186;GO:0007189;GO:0035584;GO:0051965;GO:0090129;GO:0007157;GO:0007157;GO:0007165;GO:0007166;GO:0007186;GO:0007189;GO:0035584;GO:0051965;GO:0090129;	GO:0005886;GO:0005887;GO:0014069;GO:0014069;GO:0016020;GO:0016021;GO:0030054;GO:0030424;GO:0030424;GO:0030426;GO:0042734;GO:0042734;GO:0042995;GO:0043005;GO:0045202;GO:0045202;GO:0098978;GO:0099056;GO:0005886;GO:0005887;GO:0014069;GO:0014069;GO:0016020;GO:0016021;GO:0030054;GO:0030424;GO:0030424;GO:0030426;GO:0042734;GO:0042734;GO:0042995;GO:0043005;GO:0045202;GO:0045202;GO:0098978;GO:0099056;
ENSMUSG00000013089	3975	388.655	653.615	0.750544	5.78131e-06	0.000152802	Up	Etv5	104156	ets variant 5	Q9CXC9	K15593 ETV5; ets translocation variant 5	mmu05202:Transcriptional misregulation in cancer;mmu05215:Prostate cancer;	GO:0000977;GO:0000981;GO:0001228;GO:0003677;GO:0003700;GO:0043565;GO:0044212;	GO:0006355;GO:0006357;GO:0007274;GO:0007626;GO:0030154;GO:0034599;GO:0045666;GO:0045893;GO:0045944;GO:0048133;GO:0050807;GO:0060252;GO:0060762;GO:0071340;	GO:0005634;GO:0005634;GO:0005654;
ENSMUSG00000013483	4206	69.9569	23.3588	-1.59127	0.00126469	0.0160226	Down	Card14	170720	caspase recruitment domain family, member 14	Q99KF0	K20913 CARD14; caspase recruitment domain-containing protein 14	mmu04064:NF-kappa B signaling pathway;	GO:0050700;GO:0050700;	GO:0001934;GO:0006915;GO:0033209;GO:0042981;GO:0043066;GO:0051092;	GO:0005737;GO:0005737;
ENSMUSG00000013936	889	83.9371	35.3171	-1.2524	0.00112872	0.014481	Down	Myl2	17906	myosin, light polypeptide 2, regulatory, cardiac, slow	P51667	K10351 MYL2; myosin regulatory light chain 2	mmu04260:Cardiac muscle contraction;mmu04261:Adrenergic signaling in cardiomyocytes;mmu04371:Apelin signaling pathway;mmu04510:Focal adhesion;mmu04530:Tight junction;mmu04670:Leukocyte transendothelial migration;mmu04810:Regulation of actin cytoskeleton;mmu05410:Hypertrophic cardiomyopathy (HCM);mmu05414:Dilated cardiomyopathy (DCM);	GO:0003785;GO:0005509;GO:0046872;	GO:0002026;GO:0003007;GO:0007507;GO:0007507;GO:0009791;GO:0030308;GO:0042694;GO:0048747;GO:0055003;GO:0055010;GO:0060047;GO:0060048;GO:0060048;GO:0098735;	GO:0005737;GO:0005856;GO:0015629;GO:0016459;GO:0030016;GO:0030016;GO:0043292;GO:0097512;
ENSMUSG00000015093	918	114.154	48.3331	-1.24084	5.41176e-05	0.00113183	Down	Clic3	69454	chloride intracellular channel 3	Q9D7P7	K05023 CLIC3; chloride intracellular channel protein 3	NA	GO:0005244;GO:0005254;GO:0005254;	GO:0006811;GO:0006821;GO:0034765;	GO:0005634;GO:0005634;GO:0005737;GO:0016020;GO:0016021;GO:0016604;GO:0034707;
ENSMUSG00000015243	10262	1116.79	387.216	-1.52903	3.0594e-26	8.22668e-24	Down	Abca1	11303	ATP-binding cassette, sub-family A (ABC1), member 1	Q8BPY1	K05641 ABCA1; ATP-binding cassette, subfamily A (ABC1), member 1	mmu02010:ABC transporters;mmu04975:Fat digestion and absorption;mmu04979:Cholesterol metabolism;	GO:0000166;GO:0005102;GO:0005319;GO:0005515;GO:0005524;GO:0005548;GO:0005548;GO:0005548;GO:0008035;GO:0008509;GO:0016887;GO:0017127;GO:0017127;GO:0017127;GO:0017127;GO:0019905;GO:0031267;GO:0034185;GO:0034186;GO:0034188;GO:0042626;GO:0042626;GO:0051117;GO:0090554;GO:0090554;GO:0090556;GO:0090556;GO:0000166;GO:0005102;GO:0005319;GO:0005515;GO:0005524;GO:0005548;GO:0005548;GO:0005548;GO:0008035;GO:…	GO:0002790;GO:0006497;GO:0006869;GO:0006911;GO:0007040;GO:0007186;GO:0007189;GO:0008203;GO:0008203;GO:0010875;GO:0010875;GO:0015914;GO:0016197;GO:0030301;GO:0032367;GO:0032489;GO:0033344;GO:0033344;GO:0033344;GO:0033700;GO:0033700;GO:0033700;GO:0033700;GO:0034380;GO:0042157;GO:0042158;GO:0042158;GO:0042632;GO:0043691;GO:0043691;GO:0045332;GO:0045332;GO:0050702;GO:0055085;GO:0055091;GO:0060155;GO:…	GO:0005794;GO:0005886;GO:0005886;GO:0005887;GO:0005887;GO:0009897;GO:0009986;GO:0016020;GO:0016021;GO:0030139;GO:0043231;GO:0043231;GO:0045121;GO:0045335;GO:0048471;GO:0005794;GO:0005886;GO:0005886;GO:0005887;GO:0005887;GO:0009897;GO:0009986;GO:0016020;GO:0016021;GO:0030139;GO:0043231;GO:0043231;GO:0045121;GO:0045335;GO:0048471;
ENSMUSG00000015568	4115	226.633	427.784	0.915745	1.08906e-08	5.08846e-07	Up	Lpl	16956	lipoprotein lipase	P11152	K01059 LPL; lipoprotein lipase [EC:3.1.1.34]	mmu00561:Glycerolipid metabolism;mmu03320:PPAR signaling pathway;mmu04979:Cholesterol metabolism;mmu05010:Alzheimer disease;	GO:0004465;GO:0004465;GO:0004465;GO:0004620;GO:0004806;GO:0004806;GO:0005102;GO:0005509;GO:0005515;GO:0008201;GO:0016298;GO:0016787;GO:0017129;GO:0034185;GO:0034185;GO:0042803;GO:0043395;GO:0052689;GO:0071813;	GO:0006629;GO:0006631;GO:0006633;GO:0006633;GO:0009617;GO:0010744;GO:0010886;GO:0010890;GO:0016042;GO:0016042;GO:0019432;GO:0019433;GO:0019433;GO:0019433;GO:0031670;GO:0034371;GO:0034372;GO:0034372;GO:0034375;GO:0042632;GO:0042632;GO:0045600;GO:0050718;GO:0050729;GO:0055096;GO:0070328;GO:0070328;GO:0071398;GO:0090197;GO:1900077;GO:1904209;GO:1904469;GO:2000778;	GO:0005576;GO:0005615;GO:0005615;GO:0005615;GO:0005886;GO:0009986;GO:0016020;GO:0031225;GO:0034361;GO:0042627;
ENSMUSG00000015950	2882	26.7693	132.824	2.31113	1.81598e-09	9.88734e-08	Up	Ncf1	17969	neutrophil cytosolic factor 1	Q3UBI5	K08011 NCF1; neutrophil cytosolic factor 1	mmu04062:Chemokine signaling pathway;mmu04145:Phagosome;mmu04380:Osteoclast differentiation;mmu04666:Fc gamma R-mediated phagocytosis;mmu04670:Leukocyte transendothelial migration;mmu05140:Leishmaniasis;mmu05418:Fluid shear stress and atherosclerosis;	GO:0005515;GO:0008289;GO:0016175;GO:0016175;GO:0016175;GO:0016176;GO:0017124;GO:0035091;GO:0035091;GO:0043325;GO:0043325;GO:0005515;GO:0008289;GO:0016175;GO:0016175;GO:0016175;GO:0016176;GO:0017124;GO:0035091;GO:0035091;GO:0043325;GO:0043325;GO:0005515;GO:0008289;GO:0016175;GO:0016175;GO:0016175;GO:0016176;GO:0017124;GO:0035091;GO:0035091;GO:0043325;GO:0043325;	GO:0001878;GO:0001909;GO:0002679;GO:0006612;GO:0006691;GO:0006742;GO:0006801;GO:0006915;GO:0006954;GO:0006968;GO:0008283;GO:0009617;GO:0014068;GO:0034614;GO:0042554;GO:0042554;GO:0042742;GO:0045730;GO:0045730;GO:0045730;GO:0045741;GO:0045893;GO:0045986;GO:0046330;GO:0050665;GO:0050830;GO:0050832;GO:0070946;GO:0070947;GO:0071276;GO:1900745;GO:0001878;GO:0001909;GO:0002679;GO:0006612;GO:0006691;GO:…	GO:0005737;GO:0005791;GO:0005794;GO:0005829;GO:0005829;GO:0005829;GO:0005886;GO:0016020;GO:0016020;GO:0019898;GO:0030425;GO:0043020;GO:0043020;GO:0043025;GO:0005737;GO:0005791;GO:0005794;GO:0005829;GO:0005829;GO:0005829;GO:0005886;GO:0016020;GO:0016020;GO:0019898;GO:0030425;GO:0043020;GO:0043020;GO:0043025;GO:0005737;GO:0005791;GO:0005794;GO:0005829;GO:0005829;GO:0005829;GO:0005886;GO:0016020;GO:…
ENSMUSG00000015980	2113	200.386	306.541	0.613524	0.000732896	0.0101649	Up	Lrrc27	76612	leucine rich repeat containing 27	Q80YS5	NA	NA	GO:0003674;GO:0003674;	NA	NA
ENSMUSG00000016458	3090	78.3576	14.2792	-2.44357	7.52364e-09	3.61794e-07	Down	Wt1	22431	Wilms tumor 1 homolog	Q199A7	K09234 WT1; Wilms tumor protein 1	mmu05202:Transcriptional misregulation in cancer;	GO:0000981;GO:0001228;GO:0001228;GO:0003676;GO:0003677;GO:0003690;GO:0003700;GO:0003723;GO:0005515;GO:0008270;GO:0010385;GO:0043565;GO:0043565;GO:0044212;GO:0044729;GO:0046872;GO:0070742;GO:0070742;GO:0000981;GO:0001228;GO:0001228;GO:0003676;GO:0003677;GO:0003690;GO:0003700;GO:0003723;GO:0005515;GO:0008270;GO:0010385;GO:0043565;GO:0043565;GO:0044212;GO:0044729;GO:0046872;GO:0070742;GO:0070742;	GO:0000122;GO:0001570;GO:0001656;GO:0001657;GO:0001658;GO:0001658;GO:0001822;GO:0001822;GO:0001823;GO:0003156;GO:0006355;GO:0006357;GO:0006357;GO:0006915;GO:0007281;GO:0007283;GO:0007338;GO:0007356;GO:0007507;GO:0007507;GO:0007530;GO:0007530;GO:0008285;GO:0008285;GO:0008380;GO:0008406;GO:0008584;GO:0008584;GO:0009888;GO:0010468;GO:0010628;GO:0017148;GO:0030308;GO:0030317;GO:0030325;GO:0030325;GO:…	GO:0005634;GO:0005634;GO:0005634;GO:0005654;GO:0005737;GO:0005829;GO:0016607;GO:0016607;GO:0005634;GO:0005634;GO:0005634;GO:0005654;GO:0005737;GO:0005829;GO:0016607;GO:0016607;
ENSMUSG00000016494	3063	1608.01	2576.21	0.680091	7.63044e-15	7.50289e-13	Up	Cd34	12490	CD34 antigen	Q64314	K06474 CD34; CD34 antigen	mmu04514:Cell adhesion molecules (CAMs);mmu04640:Hematopoietic cell lineage;	GO:0008134;GO:0030246;GO:0043199;GO:0008134;GO:0030246;GO:0043199;GO:0008134;GO:0030246;GO:0043199;	GO:0001894;GO:0001935;GO:0007155;GO:0008217;GO:0010629;GO:0030097;GO:0030195;GO:0032720;GO:0032733;GO:0038001;GO:0042482;GO:0045019;GO:0045766;GO:0050900;GO:0071425;GO:0071636;GO:0071657;GO:0071971;GO:0098609;GO:1900035;GO:1900038;GO:1900041;GO:1900168;GO:1901215;GO:2001214;GO:0001894;GO:0001935;GO:0007155;GO:0008217;GO:0010629;GO:0030097;GO:0030195;GO:0032720;GO:0032733;GO:0038001;GO:0042482;GO:…	GO:0005576;GO:0005737;GO:0005737;GO:0005764;GO:0005886;GO:0009897;GO:0009897;GO:0009925;GO:0009986;GO:0016020;GO:0016021;GO:0016324;GO:0036053;GO:0045171;GO:0048471;GO:0071944;GO:0005576;GO:0005737;GO:0005737;GO:0005764;GO:0005886;GO:0009897;GO:0009897;GO:0009925;GO:0009986;GO:0016020;GO:0016021;GO:0016324;GO:0036053;GO:0045171;GO:0048471;GO:0071944;GO:0005576;GO:0005737;GO:0005737;GO:0005764;GO:…
ENSMUSG00000017146	6572	209.451	122.649	-0.7736	0.000887432	0.0119048	Down	Brca1	12189	breast cancer 1, early onset	Q6NV63	K10605 BRCA1; breast cancer type 1 susceptibility protein [EC:2.3.2.27]	mmu01524:Platinum drug resistance;mmu03440:Homologous recombination;mmu03460:Fanconi anemia pathway;mmu04120:Ubiquitin mediated proteolysis;mmu04151:PI3K-Akt signaling pathway;mmu05206:MicroRNAs in cancer;mmu05224:Breast cancer;	GO:0003677;GO:0003682;GO:0003684;GO:0003713;GO:0003723;GO:0004842;GO:0004842;GO:0008270;GO:0016740;GO:0019899;GO:0031625;GO:0042802;GO:0044212;GO:0044212;GO:0046872;GO:0070063;GO:0003677;GO:0003682;GO:0003684;GO:0003713;GO:0003723;GO:0004842;GO:0004842;GO:0008270;GO:0016740;GO:0019899;GO:0031625;GO:0042802;GO:0044212;GO:0044212;GO:0046872;GO:0070063;	GO:0000724;GO:0000724;GO:0006281;GO:0006301;GO:0006302;GO:0006302;GO:0006310;GO:0006349;GO:0006357;GO:0006629;GO:0006631;GO:0006633;GO:0006974;GO:0007049;GO:0007059;GO:0007098;GO:0008630;GO:0009048;GO:0009048;GO:0010212;GO:0010575;GO:0010628;GO:0016567;GO:0031398;GO:0033147;GO:0035066;GO:0035066;GO:0035066;GO:0035067;GO:0035067;GO:0043009;GO:0043009;GO:0043627;GO:0044030;GO:0044818;GO:0045717;GO:…	GO:0000793;GO:0000794;GO:0000800;GO:0005634;GO:0005694;GO:0005737;GO:0005737;GO:0005759;GO:0005813;GO:0005886;GO:0005886;GO:0031436;GO:0031436;GO:0032991;GO:0070531;GO:0070531;GO:1990904;GO:0000793;GO:0000794;GO:0000800;GO:0005634;GO:0005694;GO:0005737;GO:0005737;GO:0005759;GO:0005813;GO:0005886;GO:0005886;GO:0031436;GO:0031436;GO:0032991;GO:0070531;GO:0070531;GO:1990904;
ENSMUSG00000017390	2786	105.759	245.849	1.21627	2.89111e-08	1.25307e-06	Up	Aldoc	11676	aldolase C, fructose-bisphosphate	P05063	K01623 ALDO; fructose-bisphosphate aldolase, class I [EC:4.1.2.13]	mmu00010:Glycolysis / Gluconeogenesis;mmu00030:Pentose phosphate pathway;mmu00051:Fructose and mannose metabolism;mmu01100:Metabolic pathways;mmu01200:Carbon metabolism;mmu01230:Biosynthesis of amino acids;mmu04066:HIF-1 signaling pathway;	GO:0003824;GO:0004332;GO:0004332;GO:0004332;GO:0008092;GO:0016829;	GO:0006096;GO:0006096;GO:0006915;GO:0007568;GO:0030388;GO:0030388;GO:0051289;GO:0051290;	GO:0005737;GO:0005739;GO:0005829;GO:0030424;GO:0099524;
ENSMUSG00000017493	3831	2694.1	1700.77	-0.664125	1.02965e-14	1.00494e-12	Down	Igfbp4	16010	insulin-like growth factor binding protein 4	P47879	K23576 IGFBP4; insulin-like growth factor-binding protein 4	NA	GO:0005515;GO:0005520;GO:0019838;GO:0031994;GO:0031995;	GO:0001558;GO:0010906;GO:0040008;GO:0043410;GO:0043567;GO:0043568;GO:0044342;	GO:0005576;GO:0005615;GO:0005615;GO:0005615;
ENSMUSG00000017607	4755	92.122	34.7265	-1.41193	3.96579e-05	0.00085103	Down	Tns4	217169	tensin 4	Q8BZ33	K18080 TNS; tensin	NA	GO:0003674;GO:0003779;	GO:0006915;GO:0008104;	GO:0005737;GO:0005856;GO:0005925;GO:0030054;
ENSMUSG00000017716	3334	253.677	163.398	-0.635043	0.000553695	0.00807917	Down	Birc5	11799	baculoviral IAP repeat-containing 5	Q549P2	K08731 BIRC5; baculoviral IAP repeat-containing protein 5	mmu01524:Platinum drug resistance;mmu04210:Apoptosis;mmu04215:Apoptosis - multiple species;mmu04390:Hippo signaling pathway;mmu05161:Hepatitis B;mmu05200:Pathways in cancer;mmu05210:Colorectal cancer;	GO:0004869;GO:0005515;GO:0008017;GO:0008270;GO:0008536;GO:0015631;GO:0019899;GO:0030414;GO:0042802;GO:0042803;GO:0043027;GO:0043027;GO:0046872;GO:0046982;GO:0048037;GO:0051087;GO:0004869;GO:0005515;GO:0008017;GO:0008270;GO:0008536;GO:0015631;GO:0019899;GO:0030414;GO:0042802;GO:0042803;GO:0043027;GO:0043027;GO:0046872;GO:0046982;GO:0048037;GO:0051087;	GO:0000086;GO:0000226;GO:0000281;GO:0006468;GO:0006915;GO:0007049;GO:0007059;GO:0007094;GO:0007346;GO:0010466;GO:0031503;GO:0031536;GO:0043066;GO:0043066;GO:0043066;GO:0043154;GO:0043154;GO:0043524;GO:0045787;GO:0045892;GO:0045931;GO:0051301;GO:0051303;GO:0061178;GO:0061469;GO:0090307;GO:0000086;GO:0000226;GO:0000281;GO:0006468;GO:0006915;GO:0007049;GO:0007059;GO:0007094;GO:0007346;GO:0010466;GO:…	GO:0000228;GO:0000775;GO:0000776;GO:0000777;GO:0005634;GO:0005634;GO:0005694;GO:0005737;GO:0005737;GO:0005737;GO:0005814;GO:0005829;GO:0005856;GO:0005874;GO:0005876;GO:0005876;GO:0005881;GO:0016324;GO:0030496;GO:0031021;GO:0032133;GO:0000228;GO:0000775;GO:0000776;GO:0000777;GO:0005634;GO:0005634;GO:0005694;GO:0005737;GO:0005737;GO:0005737;GO:0005814;GO:0005829;GO:0005856;GO:0005874;GO:0005876;GO:…
ENSMUSG00000017801	1965	1322.42	841.761	-0.650768	3.13147e-06	8.85997e-05	Down	Mlx	21428	MAX-like protein X	A2BFB0	K09113 MLX; MAX-like protein X	mmu04931:Insulin resistance;mmu04932:Non-alcoholic fatty liver disease (NAFLD);	GO:0000977;GO:0001227;GO:0003677;GO:0003700;GO:0005515;GO:0008134;GO:0042803;GO:0046982;GO:0046983;GO:0000977;GO:0001227;GO:0003677;GO:0003700;GO:0005515;GO:0008134;GO:0042803;GO:0046982;GO:0046983;GO:0000977;GO:0001227;GO:0003677;GO:0003700;GO:0005515;GO:0008134;GO:0042803;GO:0046982;GO:0046983;GO:0000977;GO:0001227;GO:0003677;GO:0003700;GO:0005515;GO:0008134;GO:0042803;GO:0046982;GO:0046983;GO:…	GO:0000122;GO:0006357;GO:0006913;GO:0045892;GO:0045944;GO:0000122;GO:0006357;GO:0006913;GO:0045892;GO:0045944;GO:0000122;GO:0006357;GO:0006913;GO:0045892;GO:0045944;GO:0000122;GO:0006357;GO:0006913;GO:0045892;GO:0045944;GO:0000122;GO:0006357;GO:0006913;GO:0045892;GO:0045944;	GO:0005634;GO:0005634;GO:0005634;GO:0005654;GO:0005737;GO:0005737;GO:0005829;GO:0031965;GO:0005634;GO:0005634;GO:0005634;GO:0005654;GO:0005737;GO:0005737;GO:0005829;GO:0031965;GO:0005634;GO:0005634;GO:0005634;GO:0005654;GO:0005737;GO:0005737;GO:0005829;GO:0031965;GO:0005634;GO:0005634;GO:0005634;GO:0005654;GO:0005737;GO:0005737;GO:0005829;GO:0031965;GO:0005634;GO:0005634;GO:0005634;GO:0005654;GO:…
ENSMUSG00000017861	3651	58.1586	19.0947	-1.59849	0.000374621	0.00582764	Down	Mybl2	17865	myeloblastosis oncogene-like 2	P48972	K21769 MYBL2; myb-related protein B	mmu04218:Cellular senescence;	GO:0000978;GO:0001228;GO:0003677;	GO:0000278;GO:0043525;GO:0045893;GO:0045944;GO:0090307;GO:1990830;	GO:0005634;GO:0005654;GO:0031523;
ENSMUSG00000018623	1068	60.1205	10.7362	-2.48717	0.000542642	0.00794252	Down	Mmp7	17393	matrix metallopeptidase 7	Q3UN27	K01397 MMP7; matrix metalloproteinase-7 (matrilysin, uterine) [EC:3.4.24.23]	mmu04310:Wnt signaling pathway;mmu05166:Human T-cell leukemia virus 1 infection;	GO:0004222;GO:0008201;GO:0008233;GO:0008233;GO:0008237;GO:0008270;GO:0016787;GO:0046872;	GO:0002779;GO:0002780;GO:0006508;GO:0006508;GO:0006508;GO:0030198;GO:0030574;GO:0042127;GO:0042493;GO:0042742;GO:0050829;GO:0050830;	GO:0005576;GO:0005615;GO:0005615;GO:0009986;GO:0031012;
ENSMUSG00000018893	1104	2279.81	951.422	-1.26156	6.5926e-23	1.44773e-20	Down	Mb	17189	myoglobin	Q3UVB1	K21892 MB; myoglobin	NA	GO:0005344;GO:0019825;GO:0020037;GO:0046872;GO:0005344;GO:0019825;GO:0020037;GO:0046872;	GO:0001666;GO:0007507;GO:0009725;GO:0015671;GO:0042542;GO:0043353;GO:0050873;GO:0001666;GO:0007507;GO:0009725;GO:0015671;GO:0042542;GO:0043353;GO:0050873;	NA
ENSMUSG00000018983	4739	852.151	542.63	-0.652219	2.98529e-07	1.08061e-05	Down	E2f2	242705	E2F transcription factor 2	Q8BJ38	K09389 E2F2; transcription factor E2F2	mmu01522:Endocrine resistance;mmu04110:Cell cycle;mmu04218:Cellular senescence;mmu04934:Cushing syndrome;mmu05160:Hepatitis C;mmu05161:Hepatitis B;mmu05163:Human cytomegalovirus infection;mmu05166:Human T-cell leukemia virus 1 infection;mmu05167:Kaposi sarcoma-associated herpesvirus infection;mmu05169:Epstein-Barr virus infection;mmu05200:Pathways in cancer;mmu05206:MicroRNAs in cancer;mmu05212:P…	GO:0000977;GO:0000981;GO:0000987;GO:0001228;GO:0003677;GO:0003700;GO:0003700;GO:0005515;GO:0008134;GO:0008134;GO:0043565;GO:0043565;GO:0046983;GO:0000977;GO:0000981;GO:0000987;GO:0001228;GO:0003677;GO:0003700;GO:0003700;GO:0005515;GO:0008134;GO:0008134;GO:0043565;GO:0043565;GO:0046983;	GO:0000122;GO:0006355;GO:0007049;GO:0045944;GO:0045944;GO:0051726;GO:0051726;GO:0072332;GO:1903671;GO:1990086;GO:0000122;GO:0006355;GO:0007049;GO:0045944;GO:0045944;GO:0051726;GO:0051726;GO:0072332;GO:1903671;GO:1990086;	GO:0005634;GO:0005634;GO:0005667;GO:0090575;GO:0090575;GO:0005634;GO:0005634;GO:0005667;GO:0090575;GO:0090575;
ENSMUSG00000019102	1729	359.568	813.507	1.17836	5.03701e-15	5.14478e-13	Up	Aldh3a1	11670	aldehyde dehydrogenase family 3, subfamily A1	Q3UNF5	K00129 E1.2.1.5; aldehyde dehydrogenase (NAD(P)+) [EC:1.2.1.5]	mmu00010:Glycolysis / Gluconeogenesis;mmu00340:Histidine metabolism;mmu00350:Tyrosine metabolism;mmu00360:Phenylalanine metabolism;mmu00410:beta-Alanine metabolism;mmu00980:Metabolism of xenobiotics by cytochrome P450;mmu00982:Drug metabolism - cytochrome P450;mmu01100:Metabolic pathways;mmu05204:Chemical carcinogenesis;	GO:0004028;GO:0004028;GO:0004028;GO:0004028;GO:0004029;GO:0004029;GO:0004030;GO:0008106;GO:0016491;GO:0016620;GO:0018479;GO:0004028;GO:0004028;GO:0004028;GO:0004028;GO:0004029;GO:0004029;GO:0004030;GO:0008106;GO:0016491;GO:0016620;GO:0018479;	GO:0001666;GO:0006081;GO:0006081;GO:0008284;GO:0014070;GO:0042493;GO:0051384;GO:0051591;GO:0055114;GO:0001666;GO:0006081;GO:0006081;GO:0008284;GO:0014070;GO:0042493;GO:0051384;GO:0051591;GO:0055114;	GO:0005737;GO:0005737;GO:0005737;GO:0005783;GO:0005829;GO:0005886;GO:0016021;GO:0005737;GO:0005737;GO:0005737;GO:0005783;GO:0005829;GO:0005886;GO:0016021;
ENSMUSG00000019359	2858	110.112	26.5624	-2.05738	6.37972e-08	2.5785e-06	Down	Gdpd2	71584	glycerophosphodiester phosphodiesterase domain containing 2	Q9ESM6	K01124 GDPD2; glycerophosphoinositol inositolphosphodiesterase [EC:3.1.4.43]	NA	GO:0008081;GO:0008889;GO:0016787;GO:0046872;GO:0047394;	GO:0006629;GO:0045669;GO:0045669;GO:0090527;	GO:0005737;GO:0005856;GO:0005884;GO:0005886;GO:0016020;GO:0016021;GO:0030027;
ENSMUSG00000019577	3484	2245.54	4466.32	0.992216	3.83139e-26	9.8985e-24	Up	Pdk4	27273	pyruvate dehydrogenase kinase, isoenzyme 4	Q544J2	K00898 PDK2_3_4; pyruvate dehydrogenase kinase 2/3/4 [EC:2.7.11.2]	NA	GO:0000166;GO:0004672;GO:0004712;GO:0004740;GO:0005524;GO:0016301;GO:0016740;GO:0000166;GO:0004672;GO:0004712;GO:0004740;GO:0005524;GO:0016301;GO:0016740;	GO:0005975;GO:0006006;GO:0006468;GO:0006885;GO:0008286;GO:0008286;GO:0009267;GO:0010510;GO:0010510;GO:0010510;GO:0010565;GO:0010906;GO:0010906;GO:0016310;GO:0042304;GO:0042304;GO:0042593;GO:0042594;GO:0045124;GO:0046320;GO:0071398;GO:0072593;GO:2000811;GO:0005975;GO:0006006;GO:0006468;GO:0006885;GO:0008286;GO:0008286;GO:0009267;GO:0010510;GO:0010510;GO:0010510;GO:0010565;GO:0010906;GO:0010906;GO:…	GO:0005739;GO:0005739;GO:0005743;GO:0005739;GO:0005739;GO:0005743;
ENSMUSG00000019773	1940	158.249	79.752	-0.984865	0.000265831	0.00438921	Down	Fbxo5	67141	F-box protein 5	Q7TSG3	K10292 FBXO5; F-box protein 5	mmu04114:Oocyte meiosis;	GO:0005515;GO:0010997;GO:0019901;GO:0046872;GO:1990948;	GO:0001556;GO:0001556;GO:0006275;GO:0007049;GO:0007057;GO:0007346;GO:0008284;GO:0010971;GO:0016050;GO:0032876;GO:0040020;GO:0045669;GO:0045835;GO:0045835;GO:0045841;GO:0046785;GO:0051225;GO:0051301;GO:0051444;GO:0060903;GO:0070169;GO:1904667;GO:1905322;GO:2000773;GO:2001021;	GO:0005634;GO:0005634;GO:0005654;GO:0005737;GO:0005737;GO:0005819;GO:0005856;GO:0072687;
ENSMUSG00000019966	5648	1673.03	2866.8	0.777177	9.01207e-13	7.51538e-11	Up	Kitl	17311	kit ligand	P20826	K05461 KITLG; KIT ligand	mmu04010:MAPK signaling pathway;mmu04014:Ras signaling pathway;mmu04015:Rap1 signaling pathway;mmu04072:Phospholipase D signaling pathway;mmu04151:PI3K-Akt signaling pathway;mmu04640:Hematopoietic cell lineage;mmu04916:Melanogenesis;mmu05200:Pathways in cancer;	GO:0005125;GO:0005125;GO:0005173;GO:0005173;GO:0005515;GO:0008083;	GO:0001541;GO:0001755;GO:0002687;GO:0002763;GO:0007155;GO:0007281;GO:0008284;GO:0008284;GO:0008284;GO:0008284;GO:0033026;GO:0035162;GO:0035234;GO:0043066;GO:0043406;GO:0045636;GO:0046579;GO:0050731;GO:0070668;GO:0097192;GO:1902035;	GO:0005576;GO:0005615;GO:0005737;GO:0005856;GO:0005886;GO:0005886;GO:0005886;GO:0016020;GO:0016021;GO:0030027;GO:0030175;GO:0042995;
ENSMUSG00000020032	5558	4876.81	3102.37	-0.652747	4.16148e-20	6.94072e-18	Down	Nuak1	77976	NUAK family, SNF1-like kinase, 1	Q641K5	K08800 NUAK; NUAK family, SNF1-like kinase [EC:2.7.11.1]	NA	GO:0000166;GO:0002039;GO:0004672;GO:0004674;GO:0004674;GO:0005524;GO:0016301;GO:0016740;	GO:0006468;GO:0006468;GO:0006974;GO:0007155;GO:0016310;GO:0030155;GO:0035507;GO:0035556;GO:2000772;	GO:0001650;GO:0005634;GO:0005634;GO:0005737;GO:0005737;GO:0015630;
ENSMUSG00000020037	3534	59.2551	10.6029	-2.45682	0.000128725	0.00237214	Down	Rfx4	71137	regulatory factor X, 4 (influences HLA class II expression)	Q7TNK1	K09174 RFX4; regulatory factor X 4	NA	GO:0000978;GO:0000978;GO:0001228;GO:0003677;GO:0003682;GO:0003700;GO:0005515;	GO:0006355;GO:0006357;GO:0006357;GO:0021516;GO:0021537;GO:0021696;GO:0021914;GO:0021914;GO:0030900;GO:0030901;GO:0045944;GO:0045944;GO:0060271;GO:0070613;	GO:0005634;GO:0005634;
ENSMUSG00000020108	1755	636.388	1121.45	0.816769	2.07382e-11	1.52172e-09	Up	Ddit4	74747	DNA-damage-inducible transcript 4	Q9D3F7	K08270 DDIT4; DNA-damage-inducible transcript 4	mmu04140:Autophagy - animal;mmu04150:mTOR signaling pathway;mmu04151:PI3K-Akt signaling pathway;mmu05206:MicroRNAs in cancer;	GO:0071889;GO:0071889;GO:0071889;GO:0071889;	GO:0001666;GO:0001666;GO:0001666;GO:0001764;GO:0006915;GO:0006915;GO:0007420;GO:0008283;GO:0009968;GO:0010801;GO:0030182;GO:0032006;GO:0032007;GO:0032007;GO:0032007;GO:0032984;GO:0033137;GO:0042771;GO:0045820;GO:0048011;GO:0051607;GO:0071549;GO:0072593;GO:1901216;GO:1902532;GO:0001666;GO:0001666;GO:0001666;GO:0001764;GO:0006915;GO:0006915;GO:0007420;GO:0008283;GO:0009968;GO:0010801;GO:0030182;GO:…	GO:0005737;GO:0005739;GO:0005829;GO:0005737;GO:0005739;GO:0005829;
ENSMUSG00000020140	4793	933.67	426.662	-1.12901	1.28838e-21	2.49643e-19	Down	Lgr5	14160	leucine rich repeat containing G protein coupled receptor 5	Q9Z1P4	K04308 LGR5; leucine-rich repeat-containing G protein-coupled receptor 5	mmu04310:Wnt signaling pathway;	GO:0004888;GO:0004888;GO:0004930;GO:0008528;GO:0016500;	GO:0001942;GO:0007165;GO:0007189;GO:0007190;GO:0009755;GO:0009994;GO:0042127;GO:0048839;GO:0090263;GO:0090263;GO:2001013;	GO:0005794;GO:0005886;GO:0005887;GO:0005887;GO:0016020;GO:0016021;GO:0032588;
ENSMUSG00000020185	5473	247.469	90.9022	-1.44301	2.30796e-09	1.21424e-07	Down	E2f7	52679	E2F transcription factor 7	Q8BQ55	K09391 E2F7_8; transcription factor E2F7/8	NA	GO:0000977;GO:0000978;GO:0000981;GO:0000987;GO:0001227;GO:0003677;GO:0003700;GO:0003700;GO:0003700;GO:0003700;GO:0003714;GO:0003714;GO:0005515;GO:0008134;GO:0042802;GO:0043565;GO:0000977;GO:0000978;GO:0000981;GO:0000987;GO:0001227;GO:0003677;GO:0003700;GO:0003700;GO:0003700;GO:0003700;GO:0003714;GO:0003714;GO:0005515;GO:0008134;GO:0042802;GO:0043565;	GO:0000122;GO:0000122;GO:0000122;GO:0000122;GO:0001890;GO:0002040;GO:0002040;GO:0006355;GO:0006974;GO:0007049;GO:0008285;GO:0008285;GO:0030330;GO:0032466;GO:0032877;GO:0045944;GO:0045944;GO:0051726;GO:0060707;GO:0060718;GO:0070365;GO:0071930;GO:2000134;GO:0000122;GO:0000122;GO:0000122;GO:0000122;GO:0001890;GO:0002040;GO:0002040;GO:0006355;GO:0006974;GO:0007049;GO:0008285;GO:0008285;GO:0030330;GO:…	GO:0005634;GO:0005634;GO:0005667;GO:0016607;GO:0090575;GO:0005634;GO:0005634;GO:0005667;GO:0016607;GO:0090575;
ENSMUSG00000020256	6027	792.584	3061.73	1.94984	8.72474e-59	1.43697e-55	Up	Aldh1l2	216188	aldehyde dehydrogenase 1 family, member L2	Q8K009	K00289 ALDH1L; formyltetrahydrofolate dehydrogenase [EC:1.5.1.6]	mmu00670:One carbon pool by folate;	GO:0003824;GO:0004029;GO:0016155;GO:0016491;GO:0016620;GO:0016742;	GO:0006730;GO:0009058;GO:0009258;	GO:0005634;GO:0005737;GO:0005739;GO:0005739;
ENSMUSG00000020471	1646	476.313	717.151	0.589749	8.9197e-06	0.000228206	Up	Pold2	18972	polymerase (DNA directed), delta 2, regulatory subunit	O35654	K02328 POLD2; DNA polymerase delta subunit 2	mmu03030:DNA replication;mmu03410:Base excision repair;mmu03420:Nucleotide excision repair;mmu03430:Mismatch repair;mmu03440:Homologous recombination;	GO:0003677;GO:0003887;GO:0003887;	GO:0006260;GO:0006261;GO:0006271;GO:0006281;GO:0006974;	GO:0005634;GO:0005654;GO:0043625;GO:0043625;
ENSMUSG00000020566	1569	53.5141	21.3083	-1.32147	0.00302009	0.0321688	Down	Atp6v1c2	68775	ATPase, H+ transporting, lysosomal V1 subunit C2	Q99L60	K02148 ATPeV1C; V-type H+-transporting ATPase subunit C	mmu00190:Oxidative phosphorylation;mmu01100:Metabolic pathways;mmu04145:Phagosome;mmu04150:mTOR signaling pathway;mmu04721:Synaptic vesicle cycle;mmu04966:Collecting duct acid secretion;mmu05165:Human papillomavirus infection;mmu05323:Rheumatoid arthritis;	GO:0008553;GO:0008553;GO:0015078;GO:0046961;GO:0046983;	GO:0006811;GO:0015991;GO:0030177;	GO:0000221;GO:0033180;
ENSMUSG00000020598	6275	8.10813	30.809	1.92337	0.00204575	0.0237906	Up	Nrcam	319504	neuronal cell adhesion molecule	Q810U4	K06756 NRCAM; neuronal cell adhesion molecule	mmu04514:Cell adhesion molecules (CAMs);	GO:0005515;GO:0030506;GO:0086080;GO:0098632;GO:0005515;GO:0030506;GO:0086080;GO:0098632;	GO:0007155;GO:0007156;GO:0007411;GO:0007411;GO:0007417;GO:0008104;GO:0010975;GO:0019227;GO:0031290;GO:0045162;GO:0045162;GO:0070593;GO:0098609;GO:0099175;GO:0099175;GO:0007155;GO:0007156;GO:0007411;GO:0007411;GO:0007417;GO:0008104;GO:0010975;GO:0019227;GO:0031290;GO:0045162;GO:0045162;GO:0070593;GO:0098609;GO:0099175;GO:0099175;	GO:0005576;GO:0005886;GO:0005886;GO:0016020;GO:0016021;GO:0030424;GO:0030424;GO:0030424;GO:0033268;GO:0042995;GO:0043194;GO:0045202;GO:0098978;GO:0098978;GO:0099055;GO:0099061;GO:0005576;GO:0005886;GO:0005886;GO:0016020;GO:0016021;GO:0030424;GO:0030424;GO:0030424;GO:0033268;GO:0042995;GO:0043194;GO:0045202;GO:0098978;GO:0098978;GO:0099055;GO:0099061;
ENSMUSG00000020601	4198	335.807	595.838	0.827721	1.80808e-10	1.20319e-08	Up	Trib2	217410	tribbles pseudokinase 2	Q8K4K3	K08814 TRIB1_2; tribbles homolog 1/2	NA	GO:0004672;GO:0004860;GO:0005524;GO:0008134;GO:0031434;GO:0031625;GO:0055106;	GO:0006468;GO:0032436;GO:0032436;GO:0043405;GO:0043433;GO:0045081;GO:0045599;GO:0051443;	GO:0005634;GO:0005737;GO:0005856;
ENSMUSG00000020609	13934	99.5525	18.5742	-2.43514	6.13531e-10	3.59284e-08	Down	Apob	238055	apolipoprotein B	E9Q414	K14462 APOB; apolipoprotein B	mmu04975:Fat digestion and absorption;mmu04977:Vitamin digestion and absorption;mmu04979:Cholesterol metabolism;	GO:0005102;GO:0005319;GO:0005543;GO:0008201;GO:0017127;GO:0035473;GO:0050750;	GO:0001701;GO:0006629;GO:0006629;GO:0006629;GO:0006629;GO:0006642;GO:0006869;GO:0007283;GO:0007399;GO:0008202;GO:0008203;GO:0009566;GO:0009743;GO:0009791;GO:0010628;GO:0010744;GO:0010884;GO:0010886;GO:0016042;GO:0019433;GO:0019433;GO:0030301;GO:0030301;GO:0030317;GO:0033344;GO:0034374;GO:0034383;GO:0042157;GO:0042157;GO:0042158;GO:0042159;GO:0042632;GO:0042632;GO:0042632;GO:0042953;GO:0042953;GO:…	GO:0005576;GO:0005615;GO:0005737;GO:0005783;GO:0005829;GO:0012506;GO:0031983;GO:0034359;GO:0034361;GO:0034362;GO:0034363;GO:0034364;GO:0042627;GO:0043025;GO:0043231;GO:0070971;
ENSMUSG00000020620	7423	535.9	1134.78	1.08259	8.17539e-20	1.32986e-17	Up	Abca8b	27404	ATP-binding cassette, sub-family A (ABC1), member 8b	Q8K440	K05650 ABCA8; ATP-binding cassette, subfamily A (ABC1), member 8	mmu02010:ABC transporters;	GO:0000166;GO:0005319;GO:0005524;GO:0016887;GO:0042626;GO:0042626;GO:0000166;GO:0005319;GO:0005524;GO:0016887;GO:0042626;GO:0042626;	GO:0006869;GO:0055085;GO:0006869;GO:0055085;	GO:0005743;GO:0005886;GO:0016020;GO:0016021;GO:0043231;GO:0005743;GO:0005886;GO:0016020;GO:0016021;GO:0043231;
ENSMUSG00000020653	4086	458.213	1117.82	1.28601	1.36082e-23	3.26003e-21	Up	Klf11	194655	Kruppel-like factor 11	Q8K1S5	K09209 KLF10_11; krueppel-like factor 10/11	NA	GO:0000981;GO:0000981;GO:0003676;GO:0003677;GO:0003700;GO:0044212;GO:0046872;	GO:0000083;GO:0000122;GO:0006357;GO:0006915;GO:0008285;GO:0043065;GO:0045892;	GO:0005634;GO:0005634;GO:0005654;GO:0005829;GO:0005925;GO:0016604;
ENSMUSG00000020654	5621	152.204	237.637	0.642564	0.000536124	0.0078839	Up	Adcy3	104111	adenylate cyclase 3	Q8VHH7	K08043 ADCY3; adenylate cyclase 3 [EC:4.6.1.1]	mmu00230:Purine metabolism;mmu01100:Metabolic pathways;mmu01522:Endocrine resistance;mmu04015:Rap1 signaling pathway;mmu04020:Calcium signaling pathway;mmu04022:cGMP-PKG signaling pathway;mmu04024:cAMP signaling pathway;mmu04062:Chemokine signaling pathway;mmu04072:Phospholipase D signaling pathway;mmu04114:Oocyte meiosis;mmu04211:Longevity regulating pathway;mmu04213:Longevity regulating pathway…	GO:0000166;GO:0004016;GO:0004016;GO:0004016;GO:0004016;GO:0005515;GO:0005516;GO:0005524;GO:0008294;GO:0016829;GO:0016849;GO:0046872;GO:0000166;GO:0004016;GO:0004016;GO:0004016;GO:0004016;GO:0005515;GO:0005516;GO:0005524;GO:0008294;GO:0016829;GO:0016849;GO:0046872;GO:0000166;GO:0004016;GO:0004016;GO:0004016;GO:0004016;GO:0005515;GO:0005516;GO:0005524;GO:0008294;GO:0016829;GO:0016849;GO:0046872;	GO:0006171;GO:0006171;GO:0006171;GO:0007189;GO:0007189;GO:0007190;GO:0007338;GO:0007340;GO:0007608;GO:0007608;GO:0008355;GO:0009190;GO:0030317;GO:0035556;GO:0050896;GO:1904322;GO:1904322;GO:0006171;GO:0006171;GO:0006171;GO:0007189;GO:0007189;GO:0007190;GO:0007338;GO:0007340;GO:0007608;GO:0007608;GO:0008355;GO:0009190;GO:0030317;GO:0035556;GO:0050896;GO:1904322;GO:1904322;GO:0006171;GO:0006171;GO:…	GO:0005634;GO:0005737;GO:0005794;GO:0005886;GO:0005886;GO:0005887;GO:0005929;GO:0005929;GO:0016020;GO:0016021;GO:0042995;GO:0045121;GO:0005634;GO:0005737;GO:0005794;GO:0005886;GO:0005886;GO:0005887;GO:0005929;GO:0005929;GO:0016020;GO:0016021;GO:0042995;GO:0045121;GO:0005634;GO:0005737;GO:0005794;GO:0005886;GO:0005886;GO:0005887;GO:0005929;GO:0005929;GO:0016020;GO:0016021;GO:0042995;GO:0045121;
ENSMUSG00000020774	4171	61.9833	113.494	0.873056	0.00209241	0.0241975	Up	Aspa	11484	aspartoacylase	Q8R3P0	K01437 ASPA; aspartoacylase [EC:3.5.1.15]	mmu00250:Alanine, aspartate and glutamate metabolism;mmu00340:Histidine metabolism;mmu01100:Metabolic pathways;	GO:0004046;GO:0005515;GO:0016787;GO:0016788;GO:0016811;GO:0016811;GO:0019807;GO:0042802;GO:0046872;	GO:0006083;GO:0048714;	GO:0005634;GO:0005737;GO:0005829;GO:0005829;GO:0005829;
ENSMUSG00000020889	2721	2252.25	3437.15	0.6101	3.52768e-10	2.20288e-08	Up	Nr1d1	217166	nuclear receptor subfamily 1, group D, member 1	Q3UV55	K03728 NR1D1; nuclear receptor subfamily 1 group D member 1	mmu04710:Circadian rhythm;	GO:0000976;GO:0000976;GO:0000977;GO:0000977;GO:0000978;GO:0000981;GO:0001222;GO:0001227;GO:0003677;GO:0003700;GO:0003707;GO:0005515;GO:0008134;GO:0008270;GO:0020037;GO:0030374;GO:0038023;GO:0043565;GO:0044212;GO:0046872;GO:0070888;GO:1990837;	GO:0000122;GO:0000122;GO:0005978;GO:0006355;GO:0007275;GO:0007623;GO:0007623;GO:0009755;GO:0010498;GO:0010871;GO:0019216;GO:0030154;GO:0031648;GO:0032922;GO:0033993;GO:0034144;GO:0035947;GO:0042632;GO:0042749;GO:0042752;GO:0042752;GO:0042752;GO:0042753;GO:0043124;GO:0044321;GO:0044321;GO:0045598;GO:0045892;GO:0045892;GO:0045892;GO:0045893;GO:0045893;GO:0045944;GO:0048511;GO:0050728;GO:0060086;GO:…	GO:0000790;GO:0005634;GO:0005634;GO:0005737;GO:0005737;GO:0016604;GO:0030425;GO:0030425;GO:0042995;GO:0043025;GO:0043197;GO:0090575;
ENSMUSG00000020897	1950	177.086	101.89	-0.795134	0.000859702	0.0116179	Down	Aurkb	20877	aurora kinase B	O70126	K11479 AURKB; aurora kinase B [EC:2.7.11.1]	NA	GO:0000166;GO:0004672;GO:0004674;GO:0004674;GO:0005515;GO:0005524;GO:0016301;GO:0016740;GO:0019900;GO:0035174;GO:0035174;GO:0046872;	GO:0000122;GO:0002903;GO:0006468;GO:0007049;GO:0007051;GO:0007052;GO:0007094;GO:0016310;GO:0032091;GO:0032212;GO:0032465;GO:0032467;GO:0034501;GO:0034644;GO:0036089;GO:0043988;GO:0051256;GO:0051301;GO:0051973;GO:1904355;	GO:0000775;GO:0000776;GO:0000779;GO:0000780;GO:0000780;GO:0000780;GO:0005634;GO:0005634;GO:0005654;GO:0005694;GO:0005737;GO:0005819;GO:0005856;GO:0005876;GO:0010369;GO:0030496;GO:0030496;GO:0031616;GO:0032133;GO:0032133;GO:0032133;GO:0051233;GO:0097431;GO:1990023;
ENSMUSG00000020914	5221	2801.82	1787.92	-0.647529	1.34822e-11	1.00363e-09	Down	Top2a	21973	topoisomerase (DNA) II alpha	Q01320	K03164 TOP2; DNA topoisomerase II [EC:5.6.2.2]	mmu01524:Platinum drug resistance;	GO:0000166;GO:0000287;GO:0003677;GO:0003682;GO:0003916;GO:0003918;GO:0003918;GO:0003918;GO:0005080;GO:0005515;GO:0005524;GO:0008022;GO:0008094;GO:0008144;GO:0008301;GO:0016853;GO:0019899;GO:0042803;GO:0042826;GO:0043130;GO:0043565;GO:0046872;GO:0046982;	GO:0000712;GO:0000819;GO:0002244;GO:0006259;GO:0006265;GO:0006265;GO:0006266;GO:0006974;GO:0007059;GO:0007059;GO:0007059;GO:0007143;GO:0030261;GO:0030263;GO:0030263;GO:0040016;GO:0042752;GO:0043065;GO:0044774;GO:0045870;GO:0045944;GO:0048511;GO:0051309;GO:1905463;	GO:0000228;GO:0000793;GO:0000793;GO:0005634;GO:0005634;GO:0005634;GO:0005654;GO:0005730;GO:0005730;GO:0005814;GO:0009330;GO:0019035;GO:0032991;GO:1990904;
ENSMUSG00000020917	4426	9389.72	14352.6	0.612163	1.04667e-21	2.05835e-19	Up	Acly	104112	ATP citrate lyase	Q91V92	K01648 ACLY; ATP citrate (pro-S)-lyase [EC:2.3.3.8]	mmu00020:Citrate cycle (TCA cycle);mmu01100:Metabolic pathways;	GO:0000166;GO:0003824;GO:0003878;GO:0003878;GO:0005515;GO:0005524;GO:0016740;GO:0046872;GO:0046912;GO:0048037;GO:0000166;GO:0003824;GO:0003878;GO:0003878;GO:0005515;GO:0005524;GO:0016740;GO:0046872;GO:0046912;GO:0048037;	GO:0006084;GO:0006085;GO:0006085;GO:0006101;GO:0006107;GO:0006629;GO:0006633;GO:0006633;GO:0008610;GO:0006084;GO:0006085;GO:0006085;GO:0006101;GO:0006107;GO:0006629;GO:0006633;GO:0006633;GO:0008610;	GO:0005654;GO:0005737;GO:0005739;GO:0005829;GO:0005829;GO:0005886;GO:0009346;GO:0005654;GO:0005737;GO:0005739;GO:0005829;GO:0005829;GO:0005886;GO:0009346;
ENSMUSG00000021070	3792	587.685	342.609	-0.777624	2.57546e-06	7.37701e-05	Down	Bdkrb2	12062	bradykinin receptor, beta 2	P32299	K03916 BDKRB2; bradykinin receptor B2	mmu04020:Calcium signaling pathway;mmu04022:cGMP-PKG signaling pathway;mmu04071:Sphingolipid signaling pathway;mmu04080:Neuroactive ligand-receptor interaction;mmu04610:Complement and coagulation cascades;mmu04750:Inflammatory mediator regulation of TRP channels;mmu04810:Regulation of actin cytoskeleton;mmu04961:Endocrine and other factor-regulated calcium reabsorption;mmu05142:Chagas disease (Am…	GO:0002020;GO:0004930;GO:0004947;GO:0004947;GO:0031698;GO:0031702;GO:0046982;	GO:0002438;GO:0006939;GO:0007165;GO:0007204;GO:0008285;GO:0009651;GO:0033137;GO:0035633;GO:0042310;GO:0042311;GO:0045776;GO:0050482;GO:1902219;GO:1902239;	GO:0005768;GO:0005886;GO:0005886;GO:0016020;GO:0016021;
ENSMUSG00000021094	2230	682.611	1116.89	0.709665	2.25585e-08	9.84207e-07	Up	Dhrs7	66375	dehydrogenase/reductase (SDR family) member 7	Q9CXR1	K11165 DHRS7; dehydrogenase/reductase SDR family member 7 [EC:1.1.-.-]	NA	GO:0016491;	GO:0008150;GO:0055114;	NA
ENSMUSG00000021200	2690	59.4753	21.2485	-1.4758	0.000759471	0.0104237	Down	Asb2	65256	ankyrin repeat and SOCS box-containing 2	Q8K0L0	K10324 ASB2; ankyrin repeat and SOCS box protein 2	NA	GO:0061630;GO:0061630;	GO:0000209;GO:0006511;GO:0016567;GO:0035556;GO:0035914;GO:0045445;	GO:0000151;GO:0031466;
ENSMUSG00000021226	2196	174.808	318.603	0.865811	2.20638e-07	8.18911e-06	Up	Acot2	171210	acyl-CoA thioesterase 2	Q9QYR9	K01068 ACOT1_2_4; acyl-coenzyme A thioesterase 1/2/4 [EC:3.1.2.2]	mmu00062:Fatty acid elongation;mmu01040:Biosynthesis of unsaturated fatty acids;mmu01100:Metabolic pathways;mmu04913:Ovarian steroidogenesis;	GO:0005102;GO:0016290;GO:0016787;GO:0016790;GO:0047617;GO:0047617;GO:0047617;GO:0052689;GO:0102991;GO:0005102;GO:0016290;GO:0016787;GO:0016790;GO:0047617;GO:0047617;GO:0047617;GO:0052689;GO:0102991;	GO:0000038;GO:0001666;GO:0001676;GO:0006631;GO:0006637;GO:0006637;GO:0006637;GO:0042760;GO:0000038;GO:0001666;GO:0001676;GO:0006631;GO:0006637;GO:0006637;GO:0006637;GO:0042760;	GO:0005739;GO:0005739;GO:0005739;GO:0005739;GO:0005739;GO:0005739;
ENSMUSG00000021240	3698	688.275	1104.95	0.682252	9.45794e-10	5.39471e-08	Up	Abcd4	19300	ATP-binding cassette, sub-family D (ALD), member 4	O89016	K05678 ABCD4; ATP-binding cassette, subfamily D (ALD), member 4	mmu02010:ABC transporters;mmu04146:Peroxisome;	GO:0000166;GO:0005524;GO:0016887;GO:0042626;	GO:0009235;GO:0055085;GO:1990830;	GO:0005789;GO:0016020;GO:0016021;
ENSMUSG00000021303	3179	322.028	206.436	-0.640867	0.000105777	0.00201404	Down	Gng4	14706	guanine nucleotide binding protein (G protein), gamma 4	P50153	K04541 GNG4; guanine nucleotide-binding protein G(I)/G(S)/G(O) subunit gamma-4	mmu04014:Ras signaling pathway;mmu04062:Chemokine signaling pathway;mmu04151:PI3K-Akt signaling pathway;mmu04371:Apelin signaling pathway;mmu04713:Circadian entrainment;mmu04723:Retrograde endocannabinoid signaling;mmu04724:Glutamatergic synapse;mmu04725:Cholinergic synapse;mmu04726:Serotonergic synapse;mmu04727:GABAergic synapse;mmu04728:Dopaminergic synapse;mmu04926:Relaxin signaling pathway;mm…	GO:0003924;GO:0031681;	GO:0007165;GO:0007186;GO:0007186;GO:0030308;	GO:0005834;GO:0005834;GO:0005886;GO:0016020;GO:0031680;
ENSMUSG00000021367	2139	164.742	69.1806	-1.25423	3.39669e-06	9.54261e-05	Down	Edn1	13614	endothelin 1	Q544E0	K16366 EDN1; endothelin-1	mmu04024:cAMP signaling pathway;mmu04066:HIF-1 signaling pathway;mmu04080:Neuroactive ligand-receptor interaction;mmu04270:Vascular smooth muscle contraction;mmu04668:TNF signaling pathway;mmu04916:Melanogenesis;mmu04924:Renin secretion;mmu04926:Relaxin signaling pathway;mmu04933:AGE-RAGE signaling pathway in diabetic complications;mmu05200:Pathways in cancer;mmu05410:Hypertrophic cardiomyopathy …	GO:0005102;GO:0005125;GO:0005179;GO:0005515;GO:0031707;GO:0031707;GO:0031708;GO:0005102;GO:0005125;GO:0005179;GO:0005515;GO:0031707;GO:0031707;GO:0031708;	GO:0000122;GO:0001501;GO:0001516;GO:0001569;GO:0001666;GO:0001701;GO:0001821;GO:0003100;GO:0006885;GO:0007166;GO:0007186;GO:0007186;GO:0007193;GO:0007193;GO:0007204;GO:0007205;GO:0007267;GO:0007507;GO:0007585;GO:0007589;GO:0008217;GO:0008217;GO:0008284;GO:0008284;GO:0009953;GO:0010460;GO:0010613;GO:0010629;GO:0010827;GO:0010870;GO:0014032;GO:0014065;GO:0014824;GO:0014826;GO:0019229;GO:0019233;GO:…	GO:0005576;GO:0005615;GO:0005615;GO:0005737;GO:0033093;GO:0045178;GO:0048237;GO:0005576;GO:0005615;GO:0005615;GO:0005737;GO:0033093;GO:0045178;GO:0048237;
ENSMUSG00000021388	2329	136.636	217.215	0.670307	0.00253848	0.0279891	Up	Aspn	66695	asporin	Q99MQ4	K08120 ASPN; asporin	NA	GO:0005509;GO:0005515;GO:0005518;GO:0030021;GO:0005509;GO:0005515;GO:0005518;GO:0030021;	GO:0030282;GO:0030512;GO:0030512;GO:0031214;GO:0070171;GO:0030282;GO:0030512;GO:0030512;GO:0031214;GO:0070171;	GO:0005576;GO:0031012;GO:0031012;GO:0042995;GO:0062023;GO:0005576;GO:0031012;GO:0031012;GO:0042995;GO:0062023;
ENSMUSG00000021403	3253	1644.78	1076.87	-0.611205	1.2448e-06	3.87742e-05	Down	Serpinb9b	20706	serine (or cysteine) peptidase inhibitor, clade B, member 9b	Q9DAV6	K13963 SERPINB; serpin B	mmu05146:Amoebiasis;	GO:0004867;GO:0005515;	GO:0001913;GO:0010951;	GO:0005615;GO:0005737;
ENSMUSG00000021453	1071	2392.57	1492.31	-0.681517	9.38649e-14	8.41336e-12	Down	Gadd45g	23882	growth arrest and DNA-damage-inducible 45 gamma	Q9R0S0	K04402 GADD45; growth arrest and DNA-damage-inducible protein	mmu04010:MAPK signaling pathway;mmu04068:FoxO signaling pathway;mmu04110:Cell cycle;mmu04115:p53 signaling pathway;mmu04210:Apoptosis;mmu04218:Cellular senescence;mmu05169:Epstein-Barr virus infection;mmu05200:Pathways in cancer;mmu05202:Transcriptional misregulation in cancer;mmu05210:Colorectal cancer;mmu05212:Pancreatic cancer;mmu05213:Endometrial cancer;mmu05214:Glioma;mmu05216:Thyroid cancer…	GO:0005515;GO:0042802;	GO:0000185;GO:0000185;GO:0000186;GO:0006469;GO:0006915;GO:0007275;GO:0030154;GO:0042095;GO:0043065;GO:0045063;GO:0046330;GO:0051726;GO:0051726;GO:0120162;GO:1900745;	GO:0005634;GO:0005634;GO:0005634;GO:0005737;GO:0005737;
ENSMUSG00000021481	3333	1208.4	489.282	-1.30312	2.55615e-15	2.73819e-13	Down	Zfp346	26919	zinc finger protein 346	Q9R0B7	NA	NA	GO:0003676;GO:0003723;GO:0003725;GO:0003725;GO:0003725;GO:0005515;GO:0008270;GO:0019899;GO:0035198;GO:0046872;	GO:0043065;	GO:0005634;GO:0005730;GO:0005730;GO:0005737;
ENSMUSG00000021508	1827	311.478	153.949	-1.01859	2.0277e-08	8.90564e-07	Down	Cxcl14	57266	chemokine (C-X-C motif) ligand 14	Q9WUQ5	K10033 CXCL14; C-X-C motif chemokine 14	mmu04060:Cytokine-cytokine receptor interaction;mmu04061:Viral protein interaction with cytokine and cytokine receptor;mmu04062:Chemokine signaling pathway;	GO:0005125;GO:0008009;GO:0005125;GO:0008009;	GO:0006955;GO:0045662;GO:0048839;GO:0060326;GO:2000503;GO:0006955;GO:0045662;GO:0048839;GO:0060326;GO:2000503;	GO:0005576;GO:0005615;GO:0005794;GO:0005576;GO:0005615;GO:0005794;
ENSMUSG00000021567	4016	1433.82	955.538	-0.58559	4.81045e-10	2.88283e-08	Down	Nkd2	72293	naked cuticle 2	Q8VE28	K03213 NKD; naked cuticle	mmu04310:Wnt signaling pathway;	GO:0005509;GO:0019838;GO:0031625;GO:0032036;GO:0046872;GO:0051117;	GO:0006887;GO:0010954;GO:0016055;GO:0030178;GO:0032436;GO:0048210;GO:0072659;GO:0090090;GO:1903078;	GO:0005737;GO:0005886;GO:0016020;GO:0016323;GO:0016328;GO:0031410;GO:0070382;GO:0071944;
ENSMUSG00000021670	4425	4236.76	6633.05	0.646568	2.77307e-16	3.26232e-14	Up	Hmgcr	15357	3-hydroxy-3-methylglutaryl-Coenzyme A reductase	Q8BV96	K00021 HMGCR; hydroxymethylglutaryl-CoA reductase (NADPH) [EC:1.1.1.34]	mmu00900:Terpenoid backbone biosynthesis;mmu01100:Metabolic pathways;mmu04152:AMPK signaling pathway;mmu04976:Bile secretion;	GO:0004420;GO:0004420;GO:0016491;GO:0016616;GO:0042282;GO:0042282;GO:0042803;GO:0050661;GO:0050662;GO:0051721;GO:0070402;GO:0004420;GO:0004420;GO:0016491;GO:0016616;GO:0042282;GO:0042282;GO:0042803;GO:0050661;GO:0050662;GO:0051721;GO:0070402;	GO:0006629;GO:0006694;GO:0006695;GO:0006695;GO:0006743;GO:0008202;GO:0008203;GO:0008284;GO:0008299;GO:0008299;GO:0008542;GO:0010664;GO:0010666;GO:0015936;GO:0016126;GO:0032874;GO:0042177;GO:0043066;GO:0043407;GO:0048643;GO:0048661;GO:0050709;GO:0051262;GO:0055114;GO:0061045;GO:0061179;GO:0070374;GO:0097756;GO:1900222;GO:0006629;GO:0006694;GO:0006695;GO:0006695;GO:0006743;GO:0008202;GO:0008203;GO:…	GO:0005778;GO:0005778;GO:0005783;GO:0005789;GO:0016020;GO:0016021;GO:0043231;GO:0005778;GO:0005778;GO:0005783;GO:0005789;GO:0016020;GO:0016021;GO:0043231;
ENSMUSG00000021707	5347	286.917	137.631	-1.05585	7.38741e-06	0.00018974	Down	Dhfr	13361	dihydrofolate reductase	Q544T5	K00287 DHFR; dihydrofolate reductase [EC:1.5.1.3]	mmu00670:One carbon pool by folate;mmu00790:Folate biosynthesis;mmu01100:Metabolic pathways;mmu01523:Antifolate resistance;	GO:0000900;GO:0003723;GO:0003729;GO:0004146;GO:0004146;GO:0004146;GO:0005542;GO:0008144;GO:0016491;GO:0050661;GO:0050661;GO:0051870;GO:0051871;GO:0070402;GO:1990825;GO:0000900;GO:0003723;GO:0003729;GO:0004146;GO:0004146;GO:0004146;GO:0005542;GO:0008144;GO:0016491;GO:0050661;GO:0050661;GO:0051870;GO:0051871;GO:0070402;GO:1990825;	GO:0006729;GO:0006729;GO:0006730;GO:0017148;GO:0031103;GO:0031427;GO:0046452;GO:0046452;GO:0046653;GO:0046654;GO:0046654;GO:0046655;GO:0046655;GO:0051000;GO:0055114;GO:2000121;GO:0006729;GO:0006729;GO:0006730;GO:0017148;GO:0031103;GO:0031427;GO:0046452;GO:0046452;GO:0046653;GO:0046654;GO:0046654;GO:0046655;GO:0046655;GO:0051000;GO:0055114;GO:2000121;	GO:0005737;GO:0005737;GO:0005739;GO:0005739;GO:0005739;GO:0005737;GO:0005737;GO:0005739;GO:0005739;GO:0005739;
ENSMUSG00000021750	3333	143.648	66.3053	-1.11636	4.70142e-05	0.000991135	Down	Fam107a	268709	family with sequence similarity 107, member A	Q78TU8	NA	NA	GO:0003779;GO:0005515;	GO:0001558;GO:0007049;GO:0030041;GO:0030335;GO:0031398;GO:0031647;GO:0031669;GO:0032956;GO:0040008;GO:0050890;GO:0051017;GO:0051895;GO:0070507;GO:0071385;GO:1900272;GO:2000134;	GO:0001725;GO:0005634;GO:0005737;GO:0005856;GO:0005886;GO:0005925;GO:0015629;GO:0015629;GO:0016020;GO:0016607;GO:0030054;GO:0032587;GO:0042995;GO:0043005;GO:0043005;GO:0045202;
ENSMUSG00000021765	2921	1608.1	652.805	-1.29952	8.41678e-29	2.77249e-26	Down	Fst	14313	follistatin	A0A0R4J026	K04661 FST; follistatin	mmu04350:TGF-beta signaling pathway;	GO:0038102;GO:0043395;GO:0048185;GO:0038102;GO:0043395;GO:0048185;GO:0038102;GO:0043395;GO:0048185;	GO:0000122;GO:0001501;GO:0002244;GO:0007276;GO:0007389;GO:0008585;GO:0030509;GO:0031069;GO:0032926;GO:0042475;GO:0043616;GO:0045596;GO:0045596;GO:0051798;GO:0000122;GO:0001501;GO:0002244;GO:0007276;GO:0007389;GO:0008585;GO:0030509;GO:0031069;GO:0032926;GO:0042475;GO:0043616;GO:0045596;GO:0045596;GO:0051798;GO:0000122;GO:0001501;GO:0002244;GO:0007276;GO:0007389;GO:0008585;GO:0030509;GO:0031069;GO:…	GO:0005576;GO:0005615;GO:0005634;GO:0005737;GO:0005576;GO:0005615;GO:0005634;GO:0005737;GO:0005576;GO:0005615;GO:0005634;GO:0005737;
ENSMUSG00000021815	1826	289.343	158.787	-0.866152	4.2109e-06	0.000115589	Down	Mss51	74843	MSS51 mitochondrial translational activator	Q9D5Z5	K17656 MSS51; mitochondrial splicing suppressor protein 51	NA	GO:0003674;GO:0046872;	GO:0008150;	GO:0005575;
ENSMUSG00000021822	2342	2519.55	1451.64	-0.795582	4.2024e-23	9.38489e-21	Down	Plau	18792	plasminogen activator, urokinase	Q0VBA8	K01348 PLAU; urokinase plasminogen activator [EC:3.4.21.73]	mmu04064:NF-kappa B signaling pathway;mmu04610:Complement and coagulation cascades;mmu05202:Transcriptional misregulation in cancer;mmu05205:Proteoglycans in cancer;mmu05206:MicroRNAs in cancer;mmu05215:Prostate cancer;	GO:0004252;GO:0005515;GO:0008233;GO:0008236;GO:0016787;GO:0004252;GO:0005515;GO:0008233;GO:0008236;GO:0016787;	GO:0001525;GO:0001666;GO:0006508;GO:0008284;GO:0010469;GO:0014909;GO:0014910;GO:0014911;GO:0030335;GO:0031639;GO:0031639;GO:0033628;GO:0033628;GO:0042060;GO:0042127;GO:0042730;GO:0042730;GO:0043403;GO:0060279;GO:0070997;GO:2000097;GO:2000345;GO:2000379;GO:0001525;GO:0001666;GO:0006508;GO:0008284;GO:0010469;GO:0014909;GO:0014910;GO:0014911;GO:0030335;GO:0031639;GO:0031639;GO:0033628;GO:0033628;GO:…	GO:0005576;GO:0005615;GO:0005615;GO:0009986;GO:0016020;GO:0005576;GO:0005615;GO:0005615;GO:0009986;GO:0016020;
ENSMUSG00000021950	1880	14274.5	6778.4	-1.07436	1.23083e-23	3.00321e-21	Down	Anxa8	11752	annexin A8	Q921D0	K17096 ANXA8; annexin A8	NA	GO:0005509;GO:0005544;GO:0005546;GO:0005547;GO:0043325;GO:0046872;GO:0051015;GO:0005509;GO:0005544;GO:0005546;GO:0005547;GO:0043325;GO:0046872;GO:0051015;	GO:0007032;GO:0007596;GO:0007599;GO:0016197;GO:1900004;GO:1900138;GO:0007032;GO:0007596;GO:0007599;GO:0016197;GO:1900004;GO:1900138;	GO:0005829;GO:0005886;GO:0031902;GO:0005829;GO:0005886;GO:0031902;
ENSMUSG00000021965	2260	118.754	70.3118	-0.754697	0.00500615	0.0479716	Down	Ska3	219114	spindle and kinetochore associated complex subunit 3	Q8C263	NA	NA	GO:0003674;	GO:0000278;GO:0000278;GO:0007049;GO:0007059;GO:0007059;GO:0031110;GO:0051301;	GO:0000775;GO:0000776;GO:0000940;GO:0000940;GO:0005694;GO:0005737;GO:0005856;GO:0005874;GO:0005876;GO:0005876;
ENSMUSG00000022032	3794	90.4443	210.859	1.22208	7.99112e-08	3.20033e-06	Up	Scara5	71145	scavenger receptor class A, member 5	Q8K299	NA	NA	GO:0005044;GO:0005515;GO:0070287;	GO:0006811;GO:0006879;GO:0006897;GO:0006898;GO:0034605;GO:0034755;GO:0055072;GO:0070207;	GO:0005886;GO:0005887;GO:0009986;GO:0016020;GO:0016021;
ENSMUSG00000022033	1720	250.761	136.293	-0.879743	1.01447e-05	0.000256065	Down	Pbk	52033	PDZ binding kinase	Q9JJ78	K08865 PBK; PDZ-binding kinase [EC:2.7.12.2]	NA	GO:0000166;GO:0004672;GO:0004674;GO:0004674;GO:0005524;GO:0016301;GO:0016740;	GO:0000278;GO:0001933;GO:0006468;GO:0016310;GO:0018105;GO:0018107;GO:0032435;GO:0032873;GO:0034644;GO:0050728;	GO:0005634;
ENSMUSG00000022034	3996	160.318	84.0062	-0.931775	0.00216015	0.0247928	Down	Esco2	71988	establishment of sister chromatid cohesion N-acetyltransferase 2	Q8CIB9	K11268 ESCO; N-acetyltransferase [EC:2.3.1.-]	NA	GO:0004468;GO:0016407;GO:0016740;GO:0016746;GO:0046872;	GO:0002244;GO:0006275;GO:0006275;GO:0006302;GO:0007049;GO:0007059;GO:0007062;GO:0034421;GO:0034421;GO:0071168;	GO:0000785;GO:0001741;GO:0005634;GO:0005694;GO:0005794;GO:0010369;GO:0030054;GO:0031618;GO:0035861;
ENSMUSG00000022124	4309	2241.12	1479.45	-0.599107	0.000238454	0.00400749	Down	Fbxl3	50789	F-box and leucine-rich repeat protein 3	Q8BNS3	K10269 FBXL3; F-box and leucine-rich repeat protein 3	mmu04710:Circadian rhythm;	GO:0004842;GO:0004842;GO:0005515;GO:0061630;GO:0004842;GO:0004842;GO:0005515;GO:0061630;GO:0004842;GO:0004842;GO:0005515;GO:0061630;	GO:0016567;GO:0016567;GO:0031146;GO:0031146;GO:0031146;GO:0031648;GO:0042752;GO:0042752;GO:0043153;GO:0043153;GO:0043161;GO:0048511;GO:0016567;GO:0016567;GO:0031146;GO:0031146;GO:0031146;GO:0031648;GO:0042752;GO:0042752;GO:0043153;GO:0043153;GO:0043161;GO:0048511;GO:0016567;GO:0016567;GO:0031146;GO:0031146;GO:0031146;GO:0031648;GO:0042752;GO:0042752;GO:0043153;GO:0043153;GO:0043161;GO:0048511;	GO:0005634;GO:0005634;GO:0005737;GO:0005829;GO:0005829;GO:0016604;GO:0019005;GO:0019005;GO:0005634;GO:0005634;GO:0005737;GO:0005829;GO:0005829;GO:0016604;GO:0019005;GO:0019005;GO:0005634;GO:0005634;GO:0005737;GO:0005829;GO:0005829;GO:0016604;GO:0019005;GO:0019005;
ENSMUSG00000022144	3674	816.613	520.112	-0.650738	1.26705e-07	4.93576e-06	Down	Gdnf	14573	glial cell line derived neurotrophic factor	P48540	K05452 GDNF; glial cell derived neurotrophic factor	NA	GO:0005160;GO:0008083;GO:0008083;GO:0030116;GO:0030971;GO:0042803;GO:0048018;	GO:0001656;GO:0001656;GO:0001657;GO:0001657;GO:0001658;GO:0001658;GO:0001755;GO:0001759;GO:0001941;GO:0003337;GO:0003337;GO:0007169;GO:0007179;GO:0007399;GO:0007422;GO:0007422;GO:0008283;GO:0008284;GO:0009611;GO:0010468;GO:0021516;GO:0021784;GO:0030182;GO:0030432;GO:0031175;GO:0032770;GO:0043524;GO:0043524;GO:0043524;GO:0045597;GO:0045944;GO:0048255;GO:0048484;GO:0048484;GO:0048485;GO:0048568;GO:…	GO:0005576;GO:0005615;GO:0005615;GO:0043235;
ENSMUSG00000022157	945	109.178	321.442	1.55844	4.26989e-16	4.85001e-14	Up	Mcpt8	17231	mast cell protease 8	Q3UWB6	NA	NA	GO:0004252;GO:0008233;GO:0008236;GO:0016787;GO:0004252;GO:0008233;GO:0008236;GO:0016787;	GO:0006508;GO:0008626;GO:0006508;GO:0008626;	GO:0005576;GO:0005615;GO:0005737;GO:0005576;GO:0005615;GO:0005737;
ENSMUSG00000022186	3527	6419.11	3785.94	-0.76168	1.2699e-07	4.93576e-06	Down	Oxct1	67041	3-oxoacid CoA transferase 1	Q9D0K2	K01027 OXCT; 3-oxoacid CoA-transferase [EC:2.8.3.5]	mmu00072:Synthesis and degradation of ketone bodies;mmu00280:Valine, leucine and isoleucine degradation;mmu00650:Butanoate metabolism;mmu01100:Metabolic pathways;	GO:0008260;GO:0008260;GO:0008410;GO:0016740;GO:0042803;	GO:0035774;GO:0042182;GO:0046950;GO:0046950;GO:0046952;	GO:0005654;GO:0005739;GO:0005739;
ENSMUSG00000022305	4244	1122.02	1755.3	0.645875	0.00127968	0.0161397	Up	Lrp12	239393	low density lipoprotein-related protein 12	Q8BUJ9	K20050 LRP3_10_12; low-density lipoprotein receptor-related protein 3/10/12	NA	GO:0003674;	GO:0001764;GO:0001764;GO:0006897;GO:0031175;GO:0031175;	GO:0005887;GO:0005905;GO:0016020;GO:0016021;
ENSMUSG00000022351	4467	8146.48	12690.6	0.639461	6.05263e-21	1.07769e-18	Up	Sqle	20775	squalene epoxidase	Q3TQK8	K00511 SQLE; squalene monooxygenase [EC:1.14.14.17]	mmu00100:Steroid biosynthesis;mmu01100:Metabolic pathways;	GO:0004506;GO:0004506;GO:0016491;GO:0050660;GO:0071949;GO:0004506;GO:0004506;GO:0016491;GO:0050660;GO:0071949;	GO:0006725;GO:0008203;GO:0008203;GO:0010033;GO:0016126;GO:0016126;GO:0055114;GO:0006725;GO:0008203;GO:0008203;GO:0010033;GO:0016126;GO:0016126;GO:0055114;	GO:0005783;GO:0016020;GO:0016021;GO:0016021;GO:0043231;GO:0005783;GO:0016020;GO:0016021;GO:0016021;GO:0043231;
ENSMUSG00000022367	4237	3494.12	1629.72	-1.10024	2.16519e-40	1.3585e-37	Down	Has2	15117	hyaluronan synthase 2	P70312	K00752 hasA; hyaluronan synthase [EC:2.4.1.212]	NA	GO:0016740;GO:0016757;GO:0042802;GO:0050501;GO:0050501;GO:0050501;	GO:0001570;GO:0008284;GO:0010838;GO:0014911;GO:0030212;GO:0030213;GO:0030213;GO:0030213;GO:0030335;GO:0036120;GO:0036302;GO:0045226;GO:0045226;GO:0051549;GO:0060349;GO:0085029;GO:0085029;GO:0090500;GO:1900026;GO:1900127;GO:1900625;GO:1901201;	GO:0005737;GO:0005887;GO:0005887;GO:0016020;GO:0016021;GO:0044853;
ENSMUSG00000022385	2692	242.434	149.388	-0.697506	0.00229532	0.0258631	Down	Gtse1	29870	G two S phase expressed protein 1	Q8R080	K10129 GTSE1; G-2 and S-phase expressed protein 1	mmu04115:p53 signaling pathway;	NA	NA	GO:0005737;GO:0005856;GO:0005874;GO:0005881;GO:0005737;GO:0005856;GO:0005874;GO:0005881;
ENSMUSG00000022389	4403	4274.22	6812.23	0.672353	1.09924e-16	1.31669e-14	Up	Tef	21685	thyrotroph embryonic factor	Q9JLC6	K09058 TEF; thyrotrophic embryonic factor	NA	GO:0000977;GO:0000978;GO:0001228;GO:0003677;GO:0003690;GO:0003700;GO:0005515;GO:0042803;GO:0043565;GO:0046982;	GO:0006355;GO:0006357;GO:0045944;GO:0045944;GO:0048511;	GO:0005634;GO:0005634;
ENSMUSG00000022422	3281	38.9669	11.1885	-1.79361	0.000661563	0.00934272	Down	Dscc1	72107	DNA replication and sister chromatid cohesion 1	Q14AI0	K11271 DSCC1; sister chromatid cohesion protein DCC1	NA	GO:0003677;GO:0003689;GO:0003689;GO:0043142;	GO:0006260;GO:0006275;GO:0006275;GO:0007049;GO:0007064;GO:0034088;GO:0034088;GO:0034421;GO:1900264;	GO:0000775;GO:0000775;GO:0000785;GO:0000785;GO:0005634;GO:0005654;GO:0005654;GO:0031390;GO:0031390;
ENSMUSG00000022425	3095	142.978	236.72	0.727311	0.000828576	0.0112318	Up	Enpp2	18606	ectonucleotide pyrophosphatase/phosphodiesterase 2	G3UXY9	K01122 ENPP2; ectonucleotide pyrophosphatase/phosphodiesterase family member 2 [EC:3.1.4.39]	mmu00565:Ether lipid metabolism;	GO:0003676;GO:0003824;GO:0004528;GO:0004528;GO:0004528;GO:0004551;GO:0004622;GO:0004622;GO:0004622;GO:0005044;GO:0005509;GO:0005509;GO:0005509;GO:0008270;GO:0008270;GO:0008270;GO:0016787;GO:0030247;GO:0046872;GO:0047391;GO:0047391;GO:0003676;GO:0003824;GO:0004528;GO:0004528;GO:0004528;GO:0004551;GO:0004622;GO:0004622;GO:0004622;GO:0005044;GO:0005509;GO:0005509;GO:0005509;GO:0008270;GO:0008270;GO:…	GO:0001953;GO:0006629;GO:0006644;GO:0006935;GO:0006955;GO:0008284;GO:0009395;GO:0010634;GO:0016042;GO:0030334;GO:0034638;GO:0034638;GO:0034638;GO:0044849;GO:0045765;GO:0048714;GO:0050731;GO:0051894;GO:0060326;GO:1900026;GO:2000394;GO:0001953;GO:0006629;GO:0006644;GO:0006935;GO:0006955;GO:0008284;GO:0009395;GO:0010634;GO:0016042;GO:0030334;GO:0034638;GO:0034638;GO:0034638;GO:0044849;GO:0045765;GO:…	GO:0005576;GO:0005615;GO:0005615;GO:0005615;GO:0005737;GO:0005794;GO:0005887;GO:0005576;GO:0005615;GO:0005615;GO:0005615;GO:0005737;GO:0005794;GO:0005887;
ENSMUSG00000022489	4215	79.5509	164.831	1.05115	5.67724e-05	0.00117431	Up	Pde1b	18574	phosphodiesterase 1B, Ca2+-calmodulin dependent	Q6PDS5	K13755 PDE1; calcium/calmodulin-dependent 3',5'-cyclic nucleotide phosphodiesterase [EC:3.1.4.17]	mmu00230:Purine metabolism;mmu01100:Metabolic pathways;mmu04020:Calcium signaling pathway;mmu04740:Olfactory transduction;mmu04742:Taste transduction;mmu04924:Renin secretion;mmu05032:Morphine addiction;	GO:0004112;GO:0004114;GO:0004115;GO:0004117;GO:0005516;GO:0008081;GO:0016787;GO:0046872;GO:0047555;GO:0048101;GO:0048101;GO:0004112;GO:0004114;GO:0004115;GO:0004117;GO:0005516;GO:0008081;GO:0016787;GO:0046872;GO:0047555;GO:0048101;GO:0048101;GO:0004112;GO:0004114;GO:0004115;GO:0004117;GO:0005516;GO:0008081;GO:0016787;GO:0046872;GO:0047555;GO:0048101;GO:0048101;	GO:0001505;GO:0001975;GO:0001975;GO:0007165;GO:0007626;GO:0008542;GO:0008542;GO:0036006;GO:0042053;GO:0042428;GO:0097011;GO:0001505;GO:0001975;GO:0001975;GO:0007165;GO:0007626;GO:0008542;GO:0008542;GO:0036006;GO:0042053;GO:0042428;GO:0097011;GO:0001505;GO:0001975;GO:0001975;GO:0007165;GO:0007626;GO:0008542;GO:0008542;GO:0036006;GO:0042053;GO:0042428;GO:0097011;	GO:0005737;GO:0043025;GO:0043025;GO:0005737;GO:0043025;GO:0043025;GO:0005737;GO:0043025;GO:0043025;
ENSMUSG00000022661	2347	2472.82	1634.92	-0.596808	2.33632e-09	1.22156e-07	Down	Cd200	17470	CD200 antigen	Q80VX2	K06556 CD200; CD200 antigen	NA	GO:0005515;GO:0086080;	GO:0008285;GO:0032088;GO:0032793;GO:0034113;GO:0043031;GO:0050776;GO:0071636;GO:0098609;GO:0150072;GO:0150074;GO:0150077;GO:0150079;GO:0150079;GO:1900165;GO:1901215;GO:1904465;GO:1905522;GO:2000405;	GO:0005886;GO:0009986;GO:0009986;GO:0016020;GO:0016021;GO:0030424;GO:0043005;GO:0043025;GO:0044297;
ENSMUSG00000022744	2147	1824.23	1130.36	-0.690446	3.53916e-07	1.26374e-05	Down	Cldnd1	224250	claudin domain containing 1	Q9CQX5	NA	NA	GO:0003674;	GO:0008150;	GO:0016020;GO:0016021;GO:0016324;
ENSMUSG00000022945	2828	168.576	64.2688	-1.3939	2.34251e-07	8.62149e-06	Down	Chaf1b	110749	chromatin assembly factor 1, subunit B (p60)	Q9D0N7	K10751 CHAF1B; chromatin assembly factor 1 subunit B	NA	GO:0005515;GO:0042393;	GO:0006260;GO:0006281;GO:0006334;GO:0006335;GO:0006974;GO:0007049;GO:0031497;	GO:0000790;GO:0005634;GO:0005654;GO:0032991;GO:0033186;GO:0033186;
ENSMUSG00000023832	2250	4209.05	7310.8	0.796675	5.49809e-10	3.24856e-08	Up	Acat2	110460	acetyl-Coenzyme A acetyltransferase 2	Q8CAY6	K00626 E2.3.1.9; acetyl-CoA C-acetyltransferase [EC:2.3.1.9]	mmu00071:Fatty acid degradation;mmu00072:Synthesis and degradation of ketone bodies;mmu00280:Valine, leucine and isoleucine degradation;mmu00310:Lysine degradation;mmu00380:Tryptophan metabolism;mmu00620:Pyruvate metabolism;mmu00630:Glyoxylate and dicarboxylate metabolism;mmu00640:Propanoate metabolism;mmu00650:Butanoate metabolism;mmu00900:Terpenoid backbone biosynthesis;mmu01100:Metabolic pathw…	GO:0003824;GO:0003985;GO:0003985;GO:0003988;GO:0016740;GO:0016746;GO:0016747;	GO:0006635;GO:0045797;	GO:0005634;GO:0005730;GO:0005737;GO:0005739;GO:0005739;GO:0005829;
ENSMUSG00000023885	5895	14590.9	9255.11	-0.656776	2.62037e-27	8.02929e-25	Down	Thbs2	21826	thrombospondin 2	Q03350	K04659 THBS2S; thrombospondin 2/3/4/5	mmu04145:Phagosome;mmu04151:PI3K-Akt signaling pathway;mmu04510:Focal adhesion;mmu04512:ECM-receptor interaction;mmu05144:Malaria;mmu05165:Human papillomavirus infection;	GO:0005509;GO:0005515;GO:0008201;	GO:0007155;GO:0016525;GO:0016525;GO:0016525;GO:0051965;	GO:0005576;GO:0005604;GO:0005615;GO:0031012;GO:0031091;GO:0062023;
ENSMUSG00000023886	3972	19.1888	1.4546	-3.64871	0.00294079	0.0314512	Down	Smoc2	64074	SPARC related modular calcium binding 2	Q8CD91	NA	NA	GO:0005509;GO:0005539;GO:0008201;GO:0046872;	GO:0010595;GO:0010811;GO:0030198;GO:0035470;GO:0045743;GO:0045766;GO:0045931;GO:1900748;GO:2000573;GO:2001028;	GO:0005576;GO:0005604;GO:0005614;GO:0005615;GO:0031012;GO:0062023;GO:0071944;
ENSMUSG00000023904	946	1333.82	2051.5	0.62108	0.000365857	0.0057251	Up	Hcfc1r1	353502	host cell factor C1 regulator 1 (XPO1-dependent)	Q9CYQ5	NA	NA	GO:0003674;	GO:0008150;	GO:0005634;GO:0005654;GO:0005737;
ENSMUSG00000023919	1942	392.532	246.093	-0.67317	0.000303856	0.00490037	Down	Cenpq	83815	centromere protein Q	Q9CPQ5	K11509 CENPQ; centromere protein Q	NA	NA	GO:0051310;GO:1905342;GO:0051310;GO:1905342;	GO:0000775;GO:0005634;GO:0005654;GO:0005694;GO:0015629;GO:0000775;GO:0005634;GO:0005654;GO:0005694;GO:0015629;
ENSMUSG00000024030	5832	136.105	75.988	-0.840725	0.00169048	0.02036	Down	Abcg1	11307	ATP binding cassette subfamily G member 1	Q64343	K05679 ABCG1; ATP-binding cassette, subfamily G (WHITE), member 1	mmu02010:ABC transporters;	GO:0000166;GO:0005524;GO:0005548;GO:0005548;GO:0016887;GO:0017127;GO:0017127;GO:0019534;GO:0034041;GO:0034041;GO:0034437;GO:0042626;GO:0042803;GO:0043531;GO:0046982;GO:0000166;GO:0005524;GO:0005548;GO:0005548;GO:0016887;GO:0017127;GO:0017127;GO:0019534;GO:0034041;GO:0034041;GO:0034437;GO:0042626;GO:0042803;GO:0043531;GO:0046982;	GO:0006355;GO:0006869;GO:0008203;GO:0010033;GO:0010745;GO:0010872;GO:0010875;GO:0010888;GO:0030301;GO:0032367;GO:0033344;GO:0033344;GO:0033344;GO:0033700;GO:0033993;GO:0034374;GO:0034375;GO:0034436;GO:0042632;GO:0042632;GO:0042987;GO:0043691;GO:0045542;GO:0055085;GO:0055091;GO:0071403;GO:0006355;GO:0006869;GO:0008203;GO:0010033;GO:0010745;GO:0010872;GO:0010875;GO:0010888;GO:0030301;GO:0032367;GO:…	GO:0005739;GO:0005768;GO:0005886;GO:0009897;GO:0009897;GO:0016020;GO:0016021;GO:0055037;GO:0005739;GO:0005768;GO:0005886;GO:0009897;GO:0009897;GO:0016020;GO:0016021;GO:0055037;
ENSMUSG00000024056	3847	292.119	193.966	-0.590966	0.000946722	0.0125353	Down	Ndc80	67052	NDC80 kinetochore complex component	Q9D0F1	K11547 NDC80; kinetochore protein NDC80	NA	GO:0005515;GO:0042802;	GO:0000070;GO:0000132;GO:0007049;GO:0007052;GO:0007059;GO:0008608;GO:0051301;GO:0051310;GO:0051315;GO:0051315;GO:0051383;GO:0090267;GO:1905342;	GO:0000775;GO:0000776;GO:0000777;GO:0000778;GO:0000942;GO:0005634;GO:0005654;GO:0005694;GO:0005813;GO:0031262;GO:0031262;
ENSMUSG00000024066	7775	3449.37	2027.58	-0.766199	5.21026e-21	9.40416e-19	Down	Xdh	22436	xanthine dehydrogenase	Q9CVF2	K00106 XDH; xanthine dehydrogenase/oxidase [EC:1.17.1.4 1.17.3.2]	mmu00230:Purine metabolism;mmu00232:Caffeine metabolism;mmu00983:Drug metabolism - other enzymes;mmu01100:Metabolic pathways;mmu04146:Peroxisome;	GO:0004854;GO:0004854;GO:0004854;GO:0004855;GO:0005506;GO:0005515;GO:0009055;GO:0016491;GO:0030151;GO:0042803;GO:0043546;GO:0046872;GO:0050421;GO:0050660;GO:0050660;GO:0051536;GO:0051537;GO:0071949;GO:0004854;GO:0004854;GO:0004854;GO:0004855;GO:0005506;GO:0005515;GO:0009055;GO:0016491;GO:0030151;GO:0042803;GO:0043546;GO:0046872;GO:0050421;GO:0050660;GO:0050660;GO:0051536;GO:0051537;GO:0071949;	GO:0001933;GO:0001937;GO:0006150;GO:0006919;GO:0007595;GO:0009115;GO:0009115;GO:0010044;GO:0010629;GO:0030856;GO:0045602;GO:0051898;GO:0055114;GO:1900745;GO:1900747;GO:2000379;GO:2001213;GO:0001933;GO:0001937;GO:0006150;GO:0006919;GO:0007595;GO:0009115;GO:0009115;GO:0010044;GO:0010629;GO:0030856;GO:0045602;GO:0051898;GO:0055114;GO:1900745;GO:1900747;GO:2000379;GO:2001213;	GO:0005576;GO:0005615;GO:0005615;GO:0005737;GO:0005777;GO:0005829;GO:0005829;GO:0016529;GO:0005576;GO:0005615;GO:0005615;GO:0005737;GO:0005777;GO:0005829;GO:0005829;GO:0016529;
ENSMUSG00000024087	5128	2424.29	4224.68	0.801247	5.76519e-26	1.46081e-23	Up	Cyp1b1	13078	cytochrome P450, family 1, subfamily b, polypeptide 1	Q64429	K07410 CYP1B1; cytochrome P450 family 1 subfamily B polypeptide 1 [EC:1.14.14.1]	mmu00140:Steroid hormone biosynthesis;mmu00380:Tryptophan metabolism;mmu00980:Metabolism of xenobiotics by cytochrome P450;mmu04913:Ovarian steroidogenesis;mmu05204:Chemical carcinogenesis;mmu05206:MicroRNAs in cancer;	GO:0004497;GO:0004497;GO:0005506;GO:0016491;GO:0016705;GO:0016712;GO:0016712;GO:0020037;GO:0046872;GO:0070330;	GO:0001525;GO:0002930;GO:0006304;GO:0006725;GO:0006725;GO:0006725;GO:0006805;GO:0006809;GO:0007155;GO:0008202;GO:0008210;GO:0008210;GO:0008285;GO:0008631;GO:0009404;GO:0009636;GO:0010575;GO:0014911;GO:0019369;GO:0019369;GO:0030199;GO:0030336;GO:0032088;GO:0033629;GO:0042537;GO:0042572;GO:0042572;GO:0042574;GO:0042574;GO:0043065;GO:0043542;GO:0045727;GO:0045766;GO:0046427;GO:0046466;GO:0048514;GO:…	GO:0005634;GO:0005739;GO:0005783;GO:0016020;GO:0043231;
ENSMUSG00000024210	2342	2006.59	1267.56	-0.662172	4.45689e-12	3.53759e-10	Down	Ip6k3	271424	inositol hexaphosphate kinase 3	Q8BWD2	K07756 IP6K; inositol-hexakisphosphate 5-kinase [EC:2.7.4.21]	mmu04070:Phosphatidylinositol signaling system;	GO:0000166;GO:0000828;GO:0000831;GO:0000832;GO:0005524;GO:0016301;GO:0016740;GO:0052723;GO:0052724;	GO:0006468;GO:0016310;GO:0032958;GO:0046488;	GO:0005634;GO:0005737;
ENSMUSG00000024378	5097	2292.33	3973.83	0.793798	1.19662e-27	3.75398e-25	Up	Stard4	170459	StAR-related lipid transfer (START) domain containing 4	Q99JV5	NA	NA	GO:0008289;GO:0015485;GO:0015485;GO:0017127;GO:0008289;GO:0015485;GO:0015485;GO:0017127;GO:0008289;GO:0015485;GO:0015485;GO:0017127;	GO:0006869;GO:0010873;GO:0010879;GO:0032367;GO:0034435;GO:0070508;GO:0070859;GO:0006869;GO:0010873;GO:0010879;GO:0032367;GO:0034435;GO:0070508;GO:0070859;GO:0006869;GO:0010873;GO:0010879;GO:0032367;GO:0034435;GO:0070508;GO:0070859;	GO:0005739;GO:0005783;GO:0005829;GO:0031410;GO:0005739;GO:0005783;GO:0005829;GO:0031410;GO:0005739;GO:0005783;GO:0005829;GO:0031410;
ENSMUSG00000024457	4338	1658.14	995.627	-0.735689	7.40505e-05	0.0014672	Down	Trim26	22670	tripartite motif-containing 26	Q3UFX3	K12008 TRIM26; tripartite motif-containing protein 26	NA	GO:0008270;GO:0016740;GO:0046872;GO:0008270;GO:0016740;GO:0046872;	GO:0002376;GO:0045087;GO:0046597;GO:0051091;GO:1902187;GO:0002376;GO:0045087;GO:0046597;GO:0051091;GO:1902187;	GO:0005634;GO:0005737;GO:0005634;GO:0005737;
ENSMUSG00000024486	2890	1169.93	736.506	-0.668218	4.92582e-09	2.46778e-07	Down	Hbegf	15200	heparin-binding EGF-like growth factor	Q5FW64	K08523 HBEGF; heparin-binding EGF-like growth factor	mmu01522:Endocrine resistance;mmu04012:ErbB signaling pathway;mmu04912:GnRH signaling pathway;mmu04915:Estrogen signaling pathway;mmu04928:Parathyroid hormone synthesis, secretion and action;mmu05205:Proteoglycans in cancer;mmu05219:Bladder cancer;	GO:0005154;GO:0005154;GO:0005154;GO:0008083;GO:0008083;GO:0008083;GO:0008201;GO:0008201;GO:0008201;GO:0005154;GO:0005154;GO:0005154;GO:0008083;GO:0008083;GO:0008083;GO:0008201;GO:0008201;GO:0008201;	GO:0001525;GO:0001832;GO:0007173;GO:0007173;GO:0007173;GO:0008016;GO:0008284;GO:0008284;GO:0016477;GO:0030307;GO:0030335;GO:0035313;GO:0048661;GO:0050731;GO:0051545;GO:0051549;GO:0051897;GO:0060326;GO:0090303;GO:0001525;GO:0001832;GO:0007173;GO:0007173;GO:0007173;GO:0008016;GO:0008284;GO:0008284;GO:0016477;GO:0030307;GO:0030335;GO:0035313;GO:0048661;GO:0050731;GO:0051545;GO:0051549;GO:0051897;GO:…	GO:0005576;GO:0005615;GO:0005615;GO:0005615;GO:0005886;GO:0005887;GO:0005887;GO:0009986;GO:0016020;GO:0016021;GO:0005576;GO:0005615;GO:0005615;GO:0005615;GO:0005886;GO:0005887;GO:0005887;GO:0009986;GO:0016020;GO:0016021;
ENSMUSG00000024512	1225	4728.56	3093.44	-0.612122	1.86773e-11	1.38254e-09	Down	Dynap	75577	dynactin associated protein	Q9D7M5	NA	NA	GO:0003674;	NA	NA
ENSMUSG00000024640	2617	2337.11	5087.89	1.1222	1.38874e-39	8.31729e-37	Up	Psat1	107272	phosphoserine aminotransferase 1	Q99K85	K00831 serC; phosphoserine aminotransferase [EC:2.6.1.52]	mmu00260:Glycine, serine and threonine metabolism;mmu00270:Cysteine and methionine metabolism;mmu00750:Vitamin B6 metabolism;mmu01100:Metabolic pathways;mmu01200:Carbon metabolism;mmu01230:Biosynthesis of amino acids;	GO:0003824;GO:0004648;GO:0008483;GO:0016740;GO:0003824;GO:0004648;GO:0008483;GO:0016740;GO:0003824;GO:0004648;GO:0008483;GO:0016740;	GO:0006564;GO:0008652;GO:0006564;GO:0008652;GO:0006564;GO:0008652;	GO:0005829;GO:0005829;GO:0005829;
ENSMUSG00000024663	5293	344.906	216.183	-0.674209	3.73661e-05	0.000805787	Down	Rab3il1	74760	RAB3A interacting protein (rabin3)-like 1	D3Z585	K16779 RAB3IP; Rab-3A-interacting protein	NA	GO:0005085;GO:0017112;GO:0019900;GO:0005085;GO:0017112;GO:0019900;	GO:0015031;GO:0015031;	GO:0005575;GO:0005575;
ENSMUSG00000024665	3150	7718.94	12455.9	0.690366	9.22981e-27	2.64374e-24	Up	Fads2	56473	fatty acid desaturase 2	Q9Z0R9	K10226 FADS2; acyl-CoA 6-desaturase (Delta-6 desaturase) [EC:1.14.19.3]	mmu00592:alpha-Linolenic acid metabolism;mmu01040:Biosynthesis of unsaturated fatty acids;mmu01100:Metabolic pathways;mmu01212:Fatty acid metabolism;mmu03320:PPAR signaling pathway;	GO:0004768;GO:0016213;GO:0016491;	GO:0006629;GO:0006631;GO:0006633;GO:0055114;	GO:0005783;GO:0016020;GO:0016021;
ENSMUSG00000024730	1176	145.577	87.2131	-0.738836	0.00436277	0.0431236	Down	Ms4a8a	64381	membrane-spanning 4-domains, subfamily A, member 8A	Q99N10	K22190 MS4A3S; membrane-spanning 4-domains subfamily A member 3/4/8/12/15/18	NA	NA	NA	GO:0016020;GO:0016021;
ENSMUSG00000024799	3083	535.823	1497.72	1.48271	5.83047e-32	2.4007e-29	Up	Tm7sf2	73166	transmembrane 7 superfamily member 2	Q71KT5	K00222 TM7SF2; Delta14-sterol reductase [EC:1.3.1.70]	mmu00100:Steroid biosynthesis;mmu01100:Metabolic pathways;	GO:0050613;GO:0050613;	GO:0006695;GO:0016126;GO:0006695;GO:0016126;	GO:0005637;GO:0005783;GO:0005789;GO:0030176;GO:0031090;GO:0043231;GO:0043235;GO:0005637;GO:0005783;GO:0005789;GO:0030176;GO:0031090;GO:0043231;GO:0043235;
ENSMUSG00000024900	4317	5054.23	9777.12	0.952006	9.18207e-39	4.83932e-36	Up	Cpt1a	12894	carnitine palmitoyltransferase 1a, liver	Q7TQD5	K08765 CPT1A; carnitine O-palmitoyltransferase 1, liver isoform [EC:2.3.1.21]	mmu00071:Fatty acid degradation;mmu01212:Fatty acid metabolism;mmu03320:PPAR signaling pathway;mmu04152:AMPK signaling pathway;mmu04714:Thermogenesis;mmu04920:Adipocytokine signaling pathway;mmu04922:Glucagon signaling pathway;mmu04931:Insulin resistance;	GO:0004095;GO:0004095;GO:0016740;GO:0016746;GO:0042802;GO:1990698;GO:0004095;GO:0004095;GO:0016740;GO:0016746;GO:0042802;GO:1990698;GO:0004095;GO:0004095;GO:0016740;GO:0016746;GO:0042802;GO:1990698;	GO:0001676;GO:0006006;GO:0006629;GO:0006631;GO:0006641;GO:0009437;GO:0009437;GO:0032000;GO:0042755;GO:0046320;GO:0050796;GO:0051260;GO:0001676;GO:0006006;GO:0006629;GO:0006631;GO:0006641;GO:0009437;GO:0009437;GO:0032000;GO:0042755;GO:0046320;GO:0050796;GO:0051260;GO:0001676;GO:0006006;GO:0006629;GO:0006631;GO:0006641;GO:0009437;GO:0009437;GO:0032000;GO:0042755;GO:0046320;GO:0050796;GO:0051260;	GO:0005739;GO:0005739;GO:0005739;GO:0005741;GO:0005743;GO:0016020;GO:0016021;GO:0031307;GO:0043231;GO:0005739;GO:0005739;GO:0005739;GO:0005741;GO:0005743;GO:0016020;GO:0016021;GO:0031307;GO:0043231;GO:0005739;GO:0005739;GO:0005739;GO:0005741;GO:0005743;GO:0016020;GO:0016021;GO:0031307;GO:0043231;
ENSMUSG00000024905	2279	4.39142	27.0255	2.61983	0.000394426	0.00609256	Up	Tesmin	17771	testis expressed metallothionein like	Q9WTJ6	NA	NA	GO:0000977;GO:0000977;	GO:0006355;GO:0007275;GO:0007283;GO:0030154;GO:0006355;GO:0007275;GO:0007283;GO:0030154;	GO:0005634;GO:0005634;GO:0005737;GO:0005634;GO:0005634;GO:0005737;
ENSMUSG00000024910	1564	152.408	70.0231	-1.12113	3.44125e-05	0.000751938	Down	Ctsw	13041	cathepsin W	Q8C2M0	K08569 CTSW; cathepsin W [EC:3.4.22.-]	mmu04142:Lysosome;mmu04210:Apoptosis;	GO:0004197;GO:0008233;GO:0008234;GO:0016787;GO:0004197;GO:0008233;GO:0008234;GO:0016787;	GO:0051603;GO:0051603;	GO:0005615;GO:0005764;GO:0005783;GO:0005615;GO:0005764;GO:0005783;
ENSMUSG00000024989	2757	341.914	207.804	-0.721276	0.000298362	0.00482951	Down	Cep55	74107	centrosomal protein 55	Q8BT07	K16456 CEP55; centrosomal protein CEP55	NA	GO:0005515;	GO:0000281;GO:0000281;GO:0007049;GO:0014066;GO:0045184;GO:0045184;GO:0051301;GO:0061952;GO:0072001;GO:1904888;	GO:0005737;GO:0005813;GO:0005815;GO:0005856;GO:0005886;GO:0030496;GO:0030496;GO:0030496;GO:0045171;GO:0090543;
ENSMUSG00000025026	4426	771.502	1241.23	0.685791	4.51542e-08	1.87092e-06	Up	Add3	27360	adducin 3 (gamma)	Q8BM29	K18622 ADD; adducin	NA	GO:0003779;GO:0005080;GO:0005198;GO:0005198;GO:0005516;GO:0030507;GO:0051015;GO:0003779;GO:0005080;GO:0005198;GO:0005198;GO:0005516;GO:0030507;GO:0051015;GO:0003779;GO:0005080;GO:0005198;GO:0005198;GO:0005516;GO:0030507;GO:0051015;	GO:0042493;GO:0045907;GO:0051016;GO:0051017;GO:0042493;GO:0045907;GO:0051016;GO:0051017;GO:0042493;GO:0045907;GO:0051016;GO:0051017;	GO:0000794;GO:0005654;GO:0005737;GO:0005856;GO:0005856;GO:0005856;GO:0005886;GO:0005903;GO:0005911;GO:0005938;GO:0014069;GO:0014069;GO:0016020;GO:0044853;GO:0000794;GO:0005654;GO:0005737;GO:0005856;GO:0005856;GO:0005856;GO:0005886;GO:0005903;GO:0005911;GO:0005938;GO:0014069;GO:0014069;GO:0016020;GO:0044853;GO:0000794;GO:0005654;GO:0005737;GO:0005856;GO:0005856;GO:0005856;GO:0005886;GO:0005903;GO:…
ENSMUSG00000025094	4393	158.463	86.2209	-0.878596	0.00118443	0.0151075	Down	Slc18a2	214084	solute carrier family 18 (vesicular monoamine), member 2	Q8BRU6	K08155 SLC18A1_2; MFS transporter, DHA1 family, solute carrier family 18 (vesicular amine transporter), member 1/2	mmu04721:Synaptic vesicle cycle;mmu04726:Serotonergic synapse;mmu04728:Dopaminergic synapse;mmu05012:Parkinson disease;mmu05030:Cocaine addiction;mmu05031:Amphetamine addiction;mmu05034:Alcoholism;	GO:0005275;GO:0005335;GO:0005335;GO:0005515;GO:0008144;GO:0008504;GO:0019899;GO:0031072;GO:0042910;	GO:0001975;GO:0006836;GO:0006836;GO:0007568;GO:0007626;GO:0009636;GO:0009791;GO:0015842;GO:0015842;GO:0015844;GO:0015893;GO:0030073;GO:0035690;GO:0042593;GO:0051589;GO:0055085;GO:0098700;	GO:0005737;GO:0008021;GO:0016020;GO:0016021;GO:0030285;GO:0030672;GO:0030672;GO:0031045;GO:0031410;GO:0042995;GO:0043005;GO:0043025;GO:0043195;GO:0043195;GO:0043679;GO:0044297;GO:0098691;GO:0098691;GO:0098794;GO:0098992;GO:0099066;
ENSMUSG00000025137	1881	1523.44	2371.01	0.638135	8.07504e-09	3.84104e-07	Up	Pcyt2	68671	phosphate cytidylyltransferase 2, ethanolamine	Q922E4	K00967 PCYT2; ethanolamine-phosphate cytidylyltransferase [EC:2.7.7.14]	mmu00440:Phosphonate and phosphinate metabolism;mmu00564:Glycerophospholipid metabolism;mmu01100:Metabolic pathways;	GO:0003824;GO:0004306;GO:0016740;GO:0016779;GO:0003824;GO:0004306;GO:0016740;GO:0016779;GO:0003824;GO:0004306;GO:0016740;GO:0016779;	GO:0006629;GO:0008654;GO:0009058;GO:0006629;GO:0008654;GO:0009058;GO:0006629;GO:0008654;GO:0009058;	NA
ENSMUSG00000025140	2914	295.517	562.716	0.928291	4.0682e-06	0.00011261	Up	Pycr1	209027	pyrroline-5-carboxylate reductase 1	Q922W5	K00286 proC; pyrroline-5-carboxylate reductase [EC:1.5.1.2]	mmu00330:Arginine and proline metabolism;mmu01100:Metabolic pathways;mmu01230:Biosynthesis of amino acids;	GO:0004735;GO:0004735;GO:0016491;GO:0042802;GO:0004735;GO:0004735;GO:0016491;GO:0042802;	GO:0006561;GO:0008652;GO:0034599;GO:0051881;GO:0055114;GO:0055129;GO:1903206;GO:0006561;GO:0008652;GO:0034599;GO:0051881;GO:0055114;GO:0055129;GO:1903206;	GO:0005739;GO:0005739;GO:0005739;GO:0005739;
ENSMUSG00000025153	10050	15578.8	24652.2	0.662134	4.36647e-20	7.19158e-18	Up	Fasn	14104	fatty acid synthase	P19096	K00665 FASN; fatty acid synthase, animal type [EC:2.3.1.85]	mmu00061:Fatty acid biosynthesis;mmu01100:Metabolic pathways;mmu01212:Fatty acid metabolism;mmu04152:AMPK signaling pathway;mmu04910:Insulin signaling pathway;	GO:0003824;GO:0004312;GO:0004312;GO:0004312;GO:0004313;GO:0004314;GO:0004315;GO:0004316;GO:0004320;GO:0008144;GO:0016295;GO:0016296;GO:0016297;GO:0016491;GO:0016740;GO:0016787;GO:0016788;GO:0016829;GO:0019171;GO:0031177;GO:0042802;GO:0042803;GO:0047117;GO:0047451;GO:0070402;GO:0102131;GO:0102132;	GO:0006084;GO:0006629;GO:0006631;GO:0006633;GO:0006633;GO:0008152;GO:0008611;GO:0009058;GO:0009888;GO:0030223;GO:0030224;GO:0030879;GO:0048468;GO:0055114;GO:0071353;GO:0090557;	GO:0005737;GO:0005739;GO:0005794;GO:0005829;GO:0005886;GO:0042587;
ENSMUSG00000025172	1138	1556.13	810.876	-0.94082	1.29072e-22	2.74299e-20	Down	Ankrd2	56642	ankyrin repeat domain 2 (stretch responsive muscle)	Q9WV06	K21434 ANKRD2; ankyrin repeat domain-containing protein 2	NA	GO:0003682;GO:0005515;GO:0031432;GO:0031432;GO:0043422;GO:0043422;GO:0061629;GO:0061629;	GO:0000122;GO:0001817;GO:0006357;GO:0007519;GO:0010832;GO:0010832;GO:0035914;GO:0035994;GO:0043619;GO:0045662;GO:0045662;GO:1902253;GO:1902253;GO:2000291;GO:2000291;	GO:0000791;GO:0005634;GO:0005634;GO:0005634;GO:0005634;GO:0005737;GO:0005829;GO:0005829;GO:0016605;GO:0030016;GO:0030017;GO:0031674;GO:0031674;GO:0043231;
ENSMUSG00000025175	3841	164.998	101.113	-0.705328	0.0015962	0.0194556	Down	Fn3k	63828	fructosamine 3 kinase	Q9ER35	K15522 FN3K; protein-fructosamine 3-kinase [EC:2.7.1.171]	NA	GO:0016301;GO:0016740;GO:0030387;GO:0030387;GO:0016301;GO:0016740;GO:0030387;GO:0030387;	GO:0016310;GO:0030389;GO:0030389;GO:0016310;GO:0030389;GO:0030389;	GO:0005829;GO:0005829;
ENSMUSG00000025272	6610	31.6734	6.66614	-2.23588	0.000529224	0.00782609	Down	Tro	56191	trophinin	E9Q886	NA	NA	GO:0003674;GO:0003674;GO:0003674;GO:0003674;	GO:0030308;GO:0030308;GO:0030308;GO:0030308;	GO:0005634;GO:0005737;GO:0005634;GO:0005737;GO:0005634;GO:0005737;GO:0005634;GO:0005737;
ENSMUSG00000025279	4747	267.112	154.969	-0.785677	5.86413e-05	0.00120728	Down	Dnase1l3	13421	deoxyribonuclease 1-like 3	O55070	K11995 DNASE1L; deoxyribonuclease-1-like protein [EC:3.1.21.-]	NA	GO:0003677;GO:0003677;GO:0004518;GO:0004519;GO:0004520;GO:0004530;GO:0004536;GO:0016787;	GO:0000737;GO:0000737;GO:0002283;GO:0002673;GO:0006308;GO:0006309;GO:0006309;GO:0006309;GO:0006915;GO:0010623;GO:0010623;GO:0012501;GO:0070948;	GO:0005576;GO:0005634;GO:0005634;GO:0005634;GO:0005783;
ENSMUSG00000025403	2289	1880.51	2900.45	0.62484	6.32059e-13	5.33847e-11	Up	Shmt2	108037	serine hydroxymethyltransferase 2 (mitochondrial)	Q9CZN7	K00600 glyA; glycine hydroxymethyltransferase [EC:2.1.2.1]	mmu00260:Glycine, serine and threonine metabolism;mmu00630:Glyoxylate and dicarboxylate metabolism;mmu00670:One carbon pool by folate;mmu01100:Metabolic pathways;mmu01200:Carbon metabolism;mmu01230:Biosynthesis of amino acids;mmu01523:Antifolate resistance;	GO:0003682;GO:0003824;GO:0004372;GO:0004372;GO:0008270;GO:0008732;GO:0016597;GO:0016597;GO:0016740;GO:0030170;GO:0030170;GO:0042802;GO:0042802;GO:0050897;GO:0070905;GO:0003682;GO:0003824;GO:0004372;GO:0004372;GO:0008270;GO:0008732;GO:0016597;GO:0016597;GO:0016740;GO:0030170;GO:0030170;GO:0042802;GO:0042802;GO:0050897;GO:0070905;	GO:0002082;GO:0002082;GO:0002082;GO:0006544;GO:0006544;GO:0006545;GO:0006563;GO:0006564;GO:0006565;GO:0006730;GO:0006730;GO:0008284;GO:0019264;GO:0019264;GO:0034340;GO:0034340;GO:0035999;GO:0046653;GO:0046653;GO:0046655;GO:0051262;GO:0051289;GO:0051289;GO:0070129;GO:0070129;GO:0070536;GO:1903715;GO:1903715;GO:1904482;GO:0002082;GO:0002082;GO:0002082;GO:0006544;GO:0006544;GO:0006545;GO:0006563;GO:…	GO:0005634;GO:0005737;GO:0005739;GO:0005739;GO:0005739;GO:0005743;GO:0005743;GO:0005743;GO:0005758;GO:0005759;GO:0005759;GO:0015630;GO:0016020;GO:0042645;GO:0070552;GO:0070552;GO:0005634;GO:0005737;GO:0005739;GO:0005739;GO:0005739;GO:0005743;GO:0005743;GO:0005743;GO:0005758;GO:0005759;GO:0005759;GO:0015630;GO:0016020;GO:0042645;GO:0070552;GO:0070552;
ENSMUSG00000025408	969	689.983	1105.05	0.678875	2.86562e-08	1.24612e-06	Up	Ddit3	13198	DNA-damage inducible transcript 3	Q3V405	K04452 DDIT3; DNA damage-inducible transcript 3	mmu04010:MAPK signaling pathway;mmu04141:Protein processing in endoplasmic reticulum;mmu04210:Apoptosis;mmu04932:Non-alcoholic fatty liver disease (NAFLD);mmu05202:Transcriptional misregulation in cancer;	GO:0000976;GO:0000978;GO:0000978;GO:0001228;GO:0003677;GO:0003677;GO:0003700;GO:0003700;GO:0005515;GO:0008134;GO:0008134;GO:0008140;GO:0043522;GO:0043565;GO:0044212;GO:0046982;GO:0046982;GO:0000976;GO:0000978;GO:0000978;GO:0001228;GO:0003677;GO:0003677;GO:0003700;GO:0003700;GO:0005515;GO:0008134;GO:0008134;GO:0008140;GO:0043522;GO:0043565;GO:0044212;GO:0046982;GO:0046982;	GO:0000122;GO:0000122;GO:0001955;GO:0006355;GO:0006355;GO:0006915;GO:0006983;GO:0006983;GO:0006986;GO:0007049;GO:0007050;GO:0010506;GO:0016055;GO:0030968;GO:0032757;GO:0032792;GO:0034263;GO:0034976;GO:0034976;GO:0042594;GO:0042789;GO:0043065;GO:0043161;GO:0043392;GO:0043433;GO:0043525;GO:0043525;GO:0044324;GO:0045454;GO:0045599;GO:0045662;GO:0045892;GO:0045892;GO:0045892;GO:0045893;GO:0045893;GO:…	GO:0005634;GO:0005634;GO:0005634;GO:0005737;GO:0005737;GO:0005737;GO:0005770;GO:0032993;GO:0035976;GO:0036488;GO:0036488;GO:0036488;GO:1990617;GO:1990617;GO:1990622;GO:1990622;GO:0005634;GO:0005634;GO:0005634;GO:0005737;GO:0005737;GO:0005737;GO:0005770;GO:0032993;GO:0035976;GO:0036488;GO:0036488;GO:0036488;GO:1990617;GO:1990617;GO:1990622;GO:1990622;
ENSMUSG00000025436	3461	111.255	184.517	0.72996	0.000431132	0.00659766	Up	Atp23	68876	ATP23 metallopeptidase and ATP synthase assembly factor homolog	Q9CWQ3	K18156 ATP23; mitochondrial inner membrane protease ATP23 [EC:3.4.24.-]	NA	GO:0003674;GO:0004222;GO:0008233;GO:0008237;GO:0016787;GO:0046872;GO:0003674;GO:0004222;GO:0008233;GO:0008237;GO:0016787;GO:0046872;	GO:0006508;GO:0033615;GO:0034982;GO:0006508;GO:0033615;GO:0034982;	GO:0005829;GO:0005886;GO:0030054;GO:0031314;GO:0043231;GO:0005829;GO:0005886;GO:0030054;GO:0031314;GO:0043231;
ENSMUSG00000025574	2490	246.229	139.967	-0.815774	0.000125817	0.00233159	Down	Tk1	21877	thymidine kinase 1	P04184	K00857 tdk; thymidine kinase [EC:2.7.1.21]	mmu00240:Pyrimidine metabolism;mmu00983:Drug metabolism - other enzymes;mmu01100:Metabolic pathways;	GO:0000166;GO:0004797;GO:0004797;GO:0005524;GO:0008270;GO:0016301;GO:0016740;GO:0042802;GO:0046872;	GO:0006259;GO:0016310;GO:0046104;GO:0046104;GO:0051289;GO:0071897;	GO:0005737;
ENSMUSG00000025656	6222	750.613	1140.23	0.603101	0.000307856	0.00495277	Up	Arhgef9	236915	CDC42 guanine nucleotide exchange factor (GEF) 9	Q3UTH8	K20686 ARHGEF9; Rho guanine nucleotide exchange factor 9	NA	GO:0005085;GO:0005089;	GO:0007264;GO:0035023;GO:0043113;GO:0099150;GO:0099150;	GO:0005737;GO:0005829;GO:0005886;GO:0005938;GO:0005938;GO:0014069;GO:0016020;GO:0030054;GO:0045202;GO:0045211;GO:0098690;GO:0098982;GO:0098982;GO:0098982;GO:0099572;
ENSMUSG00000025746	2343	83.8922	42.938	-0.967538	0.00519238	0.0493257	Down	Il6	16193	interleukin 6	A2RTD1	K05405 IL6; interleukin 6	mmu01521:EGFR tyrosine kinase inhibitor resistance;mmu01523:Antifolate resistance;mmu04060:Cytokine-cytokine receptor interaction;mmu04061:Viral protein interaction with cytokine and cytokine receptor;mmu04066:HIF-1 signaling pathway;mmu04068:FoxO signaling pathway;mmu04151:PI3K-Akt signaling pathway;mmu04218:Cellular senescence;mmu04620:Toll-like receptor signaling pathway;mmu04621:NOD-like rece…	GO:0005102;GO:0005125;GO:0005125;GO:0005138;GO:0005138;GO:0005515;GO:0008083;GO:0005102;GO:0005125;GO:0005125;GO:0005138;GO:0005138;GO:0005515;GO:0008083;GO:0005102;GO:0005125;GO:0005125;GO:0005138;GO:0005138;GO:0005515;GO:0008083;	GO:0001781;GO:0001781;GO:0001781;GO:0002262;GO:0002384;GO:0002675;GO:0006469;GO:0006953;GO:0006954;GO:0006955;GO:0008284;GO:0008285;GO:0008360;GO:0009611;GO:0010574;GO:0010575;GO:0010628;GO:0010628;GO:0010718;GO:0010976;GO:0014015;GO:0019221;GO:0031018;GO:0031175;GO:0032722;GO:0032755;GO:0032966;GO:0033138;GO:0035729;GO:0042102;GO:0042110;GO:0042127;GO:0042531;GO:0042593;GO:0042832;GO:0042981;GO:…	GO:0005576;GO:0005615;GO:0005615;GO:0005737;GO:0005896;GO:0009897;GO:0005576;GO:0005615;GO:0005615;GO:0005737;GO:0005896;GO:0009897;GO:0005576;GO:0005615;GO:0005615;GO:0005737;GO:0005896;GO:0009897;
ENSMUSG00000025762	4156	1190.02	749.881	-0.666207	9.56068e-08	3.78293e-06	Down	Larp1b	214048	La ribonucleoprotein domain family, member 1B	F6U5V1	K18757 LARP1; la-related protein 1	NA	GO:0003674;	GO:0008150;	GO:0005575;
ENSMUSG00000025912	4980	297.05	191.265	-0.634934	0.00189356	0.0224367	Down	Mybl1	17864	myeloblastosis oncogene-like 1	P51960	K09421 MYBL1; myb-related protein A	NA	GO:0000978;GO:0000981;GO:0001228;GO:0003677;GO:0000978;GO:0000981;GO:0001228;GO:0003677;GO:0000978;GO:0000981;GO:0001228;GO:0003677;	GO:0000278;GO:0006355;GO:0007141;GO:0007283;GO:0010529;GO:0030154;GO:0045893;GO:0045944;GO:0045944;GO:0045944;GO:1990511;GO:0000278;GO:0006355;GO:0007141;GO:0007283;GO:0010529;GO:0030154;GO:0045893;GO:0045944;GO:0045944;GO:0045944;GO:1990511;GO:0000278;GO:0006355;GO:0007141;GO:0007283;GO:0010529;GO:0030154;GO:0045893;GO:0045944;GO:0045944;GO:0045944;GO:1990511;	GO:0005634;GO:0005634;GO:0005634;
ENSMUSG00000025986	5498	4860.19	3056.7	-0.668763	2.11719e-11	1.54122e-09	Down	Slc39a10	227059	solute carrier family 39 (zinc transporter), member 10	Q6P5F6	K14716 SLC39A10; solute carrier family 39 (zinc transporter), member 10	NA	GO:0005385;GO:0005385;GO:0046873;	GO:0002903;GO:0006811;GO:0006829;GO:0006882;GO:0006882;GO:0030001;GO:0030890;GO:0050861;GO:0050861;GO:0055085;GO:0071578;GO:0071578;GO:1903615;	GO:0005886;GO:0005887;GO:0016020;GO:0016021;
ENSMUSG00000026012	4347	361.356	207.706	-0.796076	2.37537e-05	0.000550051	Down	Cd28	12487	CD28 antigen	Q8CDB3	K06470 CD28; CD28 antigen	mmu04514:Cell adhesion molecules (CAMs);mmu04660:T cell receptor signaling pathway;mmu04672:Intestinal immune network for IgA production;mmu04940:Type I diabetes mellitus;mmu05162:Measles;mmu05235:PD-L1 expression and PD-1 checkpoint pathway in cancer;mmu05320:Autoimmune thyroid disease;mmu05322:Systemic lupus erythematosus;mmu05323:Rheumatoid arthritis;mmu05330:Allograft rejection;mmu05332:Graft…	GO:0002020;GO:0005070;GO:0019901;GO:0042803;GO:0002020;GO:0005070;GO:0019901;GO:0042803;	GO:0002376;GO:0002863;GO:0006955;GO:0010628;GO:0010629;GO:0014068;GO:0031295;GO:0031295;GO:0031295;GO:0031295;GO:0031295;GO:0032733;GO:0032753;GO:0042102;GO:0042102;GO:0042102;GO:0042102;GO:0042110;GO:0042110;GO:0042129;GO:0045060;GO:0045066;GO:0045086;GO:0045086;GO:0045086;GO:0045589;GO:0045840;GO:0045944;GO:0046641;GO:0046641;GO:0048304;GO:0050852;GO:0050852;GO:0051897;GO:0097190;GO:0002376;GO:…	GO:0001772;GO:0005886;GO:0009897;GO:0009897;GO:0009897;GO:0009897;GO:0009986;GO:0016020;GO:0016021;GO:0045121;GO:0098636;GO:0001772;GO:0005886;GO:0009897;GO:0009897;GO:0009897;GO:0009897;GO:0009986;GO:0016020;GO:0016021;GO:0045121;GO:0098636;
ENSMUSG00000026017	5463	249.028	400.393	0.685096	0.00402575	0.0406777	Up	Carf	241066	calcium response factor	Q8VHI4	K21595 CARF; calcium-responsive transcription factor	NA	GO:0000978;GO:0001228;GO:0001228;GO:0003677;GO:0003700;GO:0003700;GO:0005515;GO:0000978;GO:0001228;GO:0001228;GO:0003677;GO:0003700;GO:0003700;GO:0005515;	GO:0006355;GO:0035865;GO:0045944;GO:0045944;GO:0061400;GO:0071277;GO:0006355;GO:0035865;GO:0045944;GO:0045944;GO:0061400;GO:0071277;	GO:0005634;GO:0005634;GO:0005654;GO:0005730;GO:0005634;GO:0005634;GO:0005654;GO:0005730;
ENSMUSG00000026198	3772	676.365	1030.68	0.607351	1.63411e-07	6.24089e-06	Up	Abcb6	74104	ATP-binding cassette, sub-family B (MDR/TAP), member 6	Q9DC29	K05661 ABCB6; ATP-binding cassette, subfamily B (MDR/TAP), member 6	mmu02010:ABC transporters;	GO:0000166;GO:0005524;GO:0015439;GO:0015562;GO:0016887;GO:0020037;GO:0042626;	GO:0006779;GO:0007420;GO:0015886;GO:0043588;GO:0055085;	GO:0005654;GO:0005739;GO:0005739;GO:0005740;GO:0005741;GO:0005768;GO:0005774;GO:0005783;GO:0005794;GO:0005829;GO:0005886;GO:0016020;GO:0016021;GO:0031307;
ENSMUSG00000026459	1495	13507.8	8604.99	-0.650532	4.49756e-28	1.44536e-25	Down	Myog	17928	myogenin	P12979	K18483 MYF4; myogenic factor 4 (myogenin)	NA	GO:0000977;GO:0000977;GO:0000978;GO:0000978;GO:0000978;GO:0000981;GO:0000987;GO:0001228;GO:0001228;GO:0001228;GO:0001228;GO:0003677;GO:0003700;GO:0005515;GO:0031490;GO:0043565;GO:0043565;GO:0046983;GO:0070888;	GO:0001503;GO:0006355;GO:0007049;GO:0007275;GO:0007517;GO:0007519;GO:0007519;GO:0008285;GO:0010831;GO:0014737;GO:0014842;GO:0014873;GO:0014878;GO:0014891;GO:0014894;GO:0014902;GO:0014902;GO:0030154;GO:0035914;GO:0042789;GO:0045663;GO:0045663;GO:0045820;GO:0045893;GO:0045944;GO:0045944;GO:0045944;GO:0045944;GO:0045944;GO:0045944;GO:0048741;GO:0048743;GO:0048743;GO:0071158;GO:0071285;GO:0071356;GO:…	GO:0005634;GO:0005634;GO:0005634;GO:0005634;GO:0005654;GO:0032993;
ENSMUSG00000026479	5164	543.475	272.89	-0.992287	5.32065e-09	2.64547e-07	Down	Lamc2	16782	laminin, gamma 2	G5E874	K06246 LAMC2; laminin, gamma 2	mmu04151:PI3K-Akt signaling pathway;mmu04510:Focal adhesion;mmu04512:ECM-receptor interaction;mmu05145:Toxoplasmosis;mmu05146:Amoebiasis;mmu05165:Human papillomavirus infection;mmu05200:Pathways in cancer;mmu05222:Small cell lung cancer;	GO:0005201;GO:0005515;GO:0008201;	GO:0007155;GO:0008284;GO:0009887;GO:0009888;GO:0016477;GO:0030335;GO:0034446;GO:0048731;GO:0070831;	GO:0005576;GO:0005604;GO:0005604;GO:0005607;GO:0005610;GO:0005615;GO:0005938;GO:0016020;GO:0031012;GO:0048471;GO:0062023;
ENSMUSG00000026525	1913	244.052	366.951	0.589057	0.00206924	0.0240214	Up	Opn3	13603	opsin 3	Q9WUK7	K04256 OPN3; c-opsin	NA	GO:0004930;GO:0008020;GO:0009881;	GO:0007165;GO:0007186;GO:0007602;GO:0018298;GO:0050896;GO:0071482;	GO:0001750;GO:0005887;GO:0016020;GO:0016021;
ENSMUSG00000026574	1724	166.166	343.166	1.04561	4.81347e-10	2.88283e-08	Up	Dpt	56429	dermatopontin	Q9QZZ6	NA	NA	GO:0005201;	GO:0007155;GO:0008285;GO:0030199;GO:0030199;	GO:0005576;GO:0005615;GO:0062023;
ENSMUSG00000026628	1984	139.546	401.932	1.52616	1.08603e-16	1.3128e-14	Up	Atf3	11910	activating transcription factor 3	Q60765	K09032 ATF3; activating transcription factor 3	NA	GO:0000976;GO:0000977;GO:0000978;GO:0000978;GO:0001227;GO:0003677;GO:0003700;GO:0042802;GO:0042803;GO:0044212;GO:0046982;GO:0000976;GO:0000977;GO:0000978;GO:0000978;GO:0001227;GO:0003677;GO:0003700;GO:0042802;GO:0042803;GO:0044212;GO:0046982;	GO:0000122;GO:0000122;GO:0006094;GO:0006355;GO:0006357;GO:0008284;GO:0010628;GO:0010628;GO:0030968;GO:0034198;GO:0035914;GO:0045892;GO:0045944;GO:0070373;GO:1903984;GO:1990440;GO:0000122;GO:0000122;GO:0006094;GO:0006355;GO:0006357;GO:0008284;GO:0010628;GO:0010628;GO:0030968;GO:0034198;GO:0035914;GO:0045892;GO:0045944;GO:0070373;GO:1903984;GO:1990440;	GO:0005634;GO:0005634;GO:0005634;GO:0005730;GO:1990622;GO:0005634;GO:0005634;GO:0005634;GO:0005730;GO:1990622;
ENSMUSG00000026674	8590	2782.31	6894.2	1.30912	0.00226787	0.0256311	Up	Ddr2	18214	discoidin domain receptor family, member 2	Q62371	K05125 DDR2; discoidin domain receptor family member 2 [EC:2.7.10.1]	NA	GO:0000166;GO:0004672;GO:0004713;GO:0004714;GO:0004714;GO:0005518;GO:0005518;GO:0005518;GO:0005524;GO:0016301;GO:0016740;GO:0038062;GO:0038062;GO:0038062;	GO:0001503;GO:0001952;GO:0003416;GO:0006468;GO:0007160;GO:0007169;GO:0007169;GO:0008284;GO:0008284;GO:0010763;GO:0016310;GO:0018108;GO:0030154;GO:0030199;GO:0030500;GO:0031214;GO:0035988;GO:0038063;GO:0038063;GO:0045669;GO:0045860;GO:0046777;GO:0046777;GO:0048146;GO:0051091;GO:0090091;GO:1903053;	GO:0005886;GO:0005887;GO:0015629;GO:0016020;GO:0016021;GO:0016324;GO:0043235;
ENSMUSG00000026675	4612	1873.35	3273.05	0.805068	1.71024e-22	3.57685e-20	Up	Hsd17b7	15490	hydroxysteroid (17-beta) dehydrogenase 7	O88736	K13373 HSD17B7; 17beta-estradiol 17-dehydrogenase / 3beta-hydroxysteroid 3-dehydrogenase [EC:1.1.1.62 1.1.1.270]	mmu00100:Steroid biosynthesis;mmu00140:Steroid hormone biosynthesis;mmu01100:Metabolic pathways;mmu04913:Ovarian steroidogenesis;	GO:0000253;GO:0000253;GO:0004303;GO:0005148;GO:0016491;	GO:0006629;GO:0006694;GO:0006695;GO:0006695;GO:0055114;	GO:0005783;GO:0005783;GO:0005886;GO:0016020;GO:0016021;
ENSMUSG00000026683	3888	426.02	273.721	-0.637172	0.000283547	0.00461806	Down	Nuf2	66977	NUF2, NDC80 kinetochore complex component	Q99P69	K11548 NUF2; kinetochore protein Nuf2	NA	GO:0044877;	GO:0007049;GO:0007052;GO:0008608;GO:0045132;GO:0051301;GO:0051315;GO:0051383;	GO:0000775;GO:0000776;GO:0000778;GO:0005634;GO:0005694;GO:0031262;GO:0031262;
ENSMUSG00000026687	2835	1235.59	2119.09	0.778523	1.52662e-15	1.66238e-13	Up	Aldh9a1	56752	aldehyde dehydrogenase 9, subfamily A1	Q9JLJ2	K00149 ALDH9A1; aldehyde dehydrogenase family 9 member A1 [EC:1.2.1.47 1.2.1.3]	mmu00010:Glycolysis / Gluconeogenesis;mmu00053:Ascorbate and aldarate metabolism;mmu00071:Fatty acid degradation;mmu00280:Valine, leucine and isoleucine degradation;mmu00310:Lysine degradation;mmu00330:Arginine and proline metabolism;mmu00340:Histidine metabolism;mmu00380:Tryptophan metabolism;mmu00410:beta-Alanine metabolism;mmu00561:Glycerolipid metabolism;mmu00620:Pyruvate metabolism;mmu01100:…	GO:0004029;GO:0004029;GO:0016491;GO:0016620;GO:0019145;GO:0019145;GO:0042803;GO:0043176;GO:0047105;GO:0047105;GO:0051287;GO:0004029;GO:0004029;GO:0016491;GO:0016620;GO:0019145;GO:0019145;GO:0042803;GO:0043176;GO:0047105;GO:0047105;GO:0051287;GO:0004029;GO:0004029;GO:0016491;GO:0016620;GO:0019145;GO:0019145;GO:0042803;GO:0043176;GO:0047105;GO:0047105;GO:0051287;GO:0004029;GO:0004029;GO:0016491;GO:…	GO:0006081;GO:0009437;GO:0042136;GO:0055114;GO:0006081;GO:0009437;GO:0042136;GO:0055114;GO:0006081;GO:0009437;GO:0042136;GO:0055114;GO:0006081;GO:0009437;GO:0042136;GO:0055114;	GO:0005737;GO:0005739;GO:0005829;GO:0005829;GO:0005737;GO:0005739;GO:0005829;GO:0005829;GO:0005737;GO:0005739;GO:0005829;GO:0005829;GO:0005737;GO:0005739;GO:0005829;GO:0005829;
ENSMUSG00000026971	4806	577.848	270.771	-1.09388	3.79595e-15	3.93822e-13	Down	Itgb6	16420	integrin beta 6	Q9Z0T9	K06589 ITGB6; integrin beta 6	mmu04151:PI3K-Akt signaling pathway;mmu04510:Focal adhesion;mmu04512:ECM-receptor interaction;mmu04810:Regulation of actin cytoskeleton;mmu05165:Human papillomavirus infection;mmu05410:Hypertrophic cardiomyopathy (HCM);mmu05412:Arrhythmogenic right ventricular cardiomyopathy (ARVC);mmu05414:Dilated cardiomyopathy (DCM);	GO:0005178;GO:0005178;GO:0038023;	GO:0006954;GO:0007155;GO:0007160;GO:0007229;GO:0016477;GO:0033627;GO:0033627;GO:0033627;GO:0038044;GO:1901388;	GO:0005654;GO:0005813;GO:0005925;GO:0005925;GO:0008305;GO:0009897;GO:0009986;GO:0016020;GO:0016021;GO:0030054;GO:0034685;GO:0034685;GO:0034685;GO:0043235;
ENSMUSG00000027016	2740	21.6851	54.8877	1.3385	0.00114315	0.0146377	Up	Zfp385b	241494	zinc finger protein 385B	A2AS57	NA	NA	GO:0002039;GO:0003676;GO:0008270;GO:0046872;GO:0002039;GO:0003676;GO:0008270;GO:0046872;GO:0002039;GO:0003676;GO:0008270;GO:0046872;GO:0002039;GO:0003676;GO:0008270;GO:0046872;	GO:0006915;GO:0072332;GO:0006915;GO:0072332;GO:0006915;GO:0072332;GO:0006915;GO:0072332;	GO:0001650;GO:0005634;GO:0005634;GO:0001650;GO:0005634;GO:0005634;GO:0001650;GO:0005634;GO:0005634;GO:0001650;GO:0005634;GO:0005634;
ENSMUSG00000027022	12612	196.182	308.642	0.653888	0.000348854	0.0055048	Up	Xirp2	241431	xin actin-binding repeat containing 2	Q4U4S6	NA	NA	GO:0003779;GO:0005515;GO:0046872;GO:0051015;GO:0051393;	GO:0003281;GO:0007507;GO:0030036;GO:0045216;GO:0055008;	GO:0001725;GO:0005925;GO:0030018;GO:0030054;
ENSMUSG00000027068	4281	22.4788	64.8578	1.52767	0.000735439	0.0101787	Up	Dhrs9	241452	dehydrogenase/reductase (SDR family) member 9	Q58NB6	K11149 DHRS9; dehydrogenase/reductase SDR family member 9 [EC:1.1.-.-]	mmu00830:Retinol metabolism;mmu01100:Metabolic pathways;	GO:0004022;GO:0004745;GO:0016491;GO:0047023;GO:0047035;GO:0047044;GO:0004022;GO:0004745;GO:0016491;GO:0047023;GO:0047035;GO:0047044;	GO:0002138;GO:0008209;GO:0042448;GO:0042904;GO:0055114;GO:0002138;GO:0008209;GO:0042448;GO:0042904;GO:0055114;	GO:0005737;GO:0005783;GO:0016020;GO:0030176;GO:0043231;GO:0005737;GO:0005783;GO:0016020;GO:0030176;GO:0043231;
ENSMUSG00000027087	7054	9669.46	3908.92	-1.30654	1.66045e-59	3.12545e-56	Down	Itgav	16410	integrin alpha V	P43406	K06487 ITGAV; integrin alpha V	mmu04145:Phagosome;mmu04151:PI3K-Akt signaling pathway;mmu04510:Focal adhesion;mmu04512:ECM-receptor interaction;mmu04514:Cell adhesion molecules (CAMs);mmu04810:Regulation of actin cytoskeleton;mmu04919:Thyroid hormone signaling pathway;mmu05163:Human cytomegalovirus infection;mmu05165:Human papillomavirus infection;mmu05200:Pathways in cancer;mmu05205:Proteoglycans in cancer;mmu05222:Small cell…	GO:0001846;GO:0001968;GO:0002020;GO:0005080;GO:0005102;GO:0005178;GO:0005178;GO:0005245;GO:0017134;GO:0019960;GO:0031994;GO:0038132;GO:0046872;GO:0046982;GO:0050840;GO:1990430;	GO:0001525;GO:0001568;GO:0006954;GO:0007155;GO:0007160;GO:0007160;GO:0007204;GO:0007229;GO:0007275;GO:0008284;GO:0009566;GO:0010745;GO:0010888;GO:0016477;GO:0030154;GO:0030335;GO:0031589;GO:0032369;GO:0032490;GO:0033627;GO:0033627;GO:0033690;GO:0034113;GO:0034446;GO:0035262;GO:0035987;GO:0038027;GO:0038044;GO:0042110;GO:0043277;GO:0043277;GO:0043277;GO:0043277;GO:0043542;GO:0045124;GO:0045715;GO:…	GO:0005634;GO:0005829;GO:0005886;GO:0005886;GO:0005925;GO:0008305;GO:0009897;GO:0009986;GO:0016020;GO:0016021;GO:0030054;GO:0031258;GO:0031527;GO:0031528;GO:0032587;GO:0034683;GO:0034683;GO:0034684;GO:0034684;GO:0034685;GO:0034685;GO:0034686;GO:0035867;GO:0035868;
ENSMUSG00000027306	3526	474.587	256.049	-0.888706	1.683e-08	7.49164e-07	Down	Nusap1	108907	nucleolar and spindle associated protein 1	Q9ERH4	NA	NA	GO:0003677;GO:0008017;GO:0008017;	GO:0000070;GO:0000226;GO:0000281;GO:0000281;GO:0007049;GO:0007076;GO:0007076;GO:0040001;GO:0040001;GO:0045840;GO:0051301;	GO:0005634;GO:0005694;GO:0005730;GO:0005730;GO:0005737;GO:0005819;GO:0005856;GO:0005874;GO:0005876;GO:0005876;GO:0072686;
ENSMUSG00000027313	1637	338.768	1174.2	1.79282	4.56539e-34	2.07426e-31	Up	Chac1	69065	ChaC, cation transport regulator 1	Q8R3J5	K07232 CHAC; glutathione-specific gamma-glutamylcyclotransferase [EC:4.3.2.7]	mmu00480:Glutathione metabolism;mmu01100:Metabolic pathways;	GO:0003839;GO:0005112;GO:0016829;	GO:0006751;GO:0006915;GO:0006986;GO:0007219;GO:0007399;GO:0010955;GO:0022008;GO:0045746;GO:0070059;	GO:0005737;GO:0005794;GO:0005802;GO:0005829;
ENSMUSG00000027339	8233	408.485	726.189	0.830175	9.00484e-11	6.11586e-09	Up	Rassf2	215653	Ras association (RalGDS/AF-6) domain family member 2	Q8BMS9	K09851 RASSF2_4; Ras association domain-containing protein 2/4	mmu04392:Hippo signaling pathway - multiple species;	GO:0004672;GO:0005515;	GO:0001501;GO:0001503;GO:0007049;GO:0007165;GO:0031954;GO:0033137;GO:0038168;GO:0042981;GO:0043065;GO:0045667;GO:0045670;GO:0045860;GO:0046330;GO:0046849;GO:0048872;GO:0050821;GO:1901222;GO:1901223;	GO:0000775;GO:0000776;GO:0005634;GO:0005634;GO:0005654;GO:0005694;GO:0005737;GO:0005737;GO:0005794;GO:0005829;GO:0005886;GO:0032991;
ENSMUSG00000027341	2957	551.998	1165.84	1.07825	3.94e-19	6.03645e-17	Up	Tmem230	70612	transmembrane protein 230	Q8CIB6	NA	NA	GO:0003674;	GO:0048489;	GO:0005768;GO:0005769;GO:0005770;GO:0005783;GO:0005794;GO:0005802;GO:0008021;GO:0016020;GO:0016021;GO:0030054;GO:0031410;GO:0045202;GO:0055037;
ENSMUSG00000027379	3421	448.336	262.155	-0.773819	1.30883e-05	0.000324158	Down	Bub1	12235	BUB1, mitotic checkpoint serine/threonine kinase	Q8K1K8	K02178 BUB1; checkpoint serine/threonine-protein kinase [EC:2.7.11.1]	mmu04110:Cell cycle;mmu04114:Oocyte meiosis;mmu04914:Progesterone-mediated oocyte maturation;	GO:0000166;GO:0004672;GO:0004674;GO:0005524;GO:0016301;GO:0016740;GO:0000166;GO:0004672;GO:0004674;GO:0005524;GO:0016301;GO:0016740;GO:0000166;GO:0004672;GO:0004674;GO:0005524;GO:0016301;GO:0016740;	GO:0006915;GO:0007049;GO:0007059;GO:0007063;GO:0007094;GO:0016310;GO:0051301;GO:0051754;GO:0051983;GO:2001244;GO:0006915;GO:0007049;GO:0007059;GO:0007063;GO:0007094;GO:0016310;GO:0051301;GO:0051754;GO:0051983;GO:2001244;GO:0006915;GO:0007049;GO:0007059;GO:0007063;GO:0007094;GO:0016310;GO:0051301;GO:0051754;GO:0051983;GO:2001244;	GO:0000775;GO:0000776;GO:0000776;GO:0000777;GO:0000778;GO:0000780;GO:0000942;GO:0005634;GO:0005654;GO:0005694;GO:0005829;GO:0000775;GO:0000776;GO:0000776;GO:0000777;GO:0000778;GO:0000780;GO:0000942;GO:0005634;GO:0005654;GO:0005694;GO:0005829;GO:0000775;GO:0000776;GO:0000776;GO:0000777;GO:0000778;GO:0000780;GO:0000942;GO:0005634;GO:0005654;GO:0005694;GO:0005829;
ENSMUSG00000027412	3470	2198	1440.54	-0.609394	3.7243e-10	2.31469e-08	Down	Lpin3	64899	lipin 3	Q571G1	K15728 LPIN; phosphatidate phosphatase LPIN [EC:3.1.3.4]	mmu00561:Glycerolipid metabolism;mmu00564:Glycerophospholipid metabolism;mmu01100:Metabolic pathways;	GO:0003713;GO:0008195;GO:0008195;GO:0016787;GO:0003713;GO:0008195;GO:0008195;GO:0016787;GO:0003713;GO:0008195;GO:0008195;GO:0016787;	GO:0006629;GO:0006631;GO:0009062;GO:0019432;GO:0032869;GO:0045944;GO:0006629;GO:0006631;GO:0009062;GO:0019432;GO:0032869;GO:0045944;GO:0006629;GO:0006631;GO:0009062;GO:0019432;GO:0032869;GO:0045944;	GO:0005634;GO:0005634;GO:0005634;GO:0005634;GO:0005634;GO:0005634;
ENSMUSG00000027514	3325	87.8875	38.8325	-1.17873	0.0017393	0.0208906	Down	Zbp1	58203	Z-DNA binding protein 1	A2APF7	K12965 ZBP1; Z-DNA binding protein 1	mmu04217:Necroptosis;mmu04623:Cytosolic DNA-sensing pathway;	GO:0003677;GO:0003677;GO:0003677;GO:0003692;GO:0003723;GO:0003726;GO:0005515;GO:0042802;GO:0003677;GO:0003677;GO:0003677;GO:0003692;GO:0003723;GO:0003726;GO:0005515;GO:0042802;	GO:0002376;GO:0016032;GO:0045087;GO:0051607;GO:0060340;GO:0060340;GO:0002376;GO:0016032;GO:0045087;GO:0051607;GO:0060340;GO:0060340;	GO:0005634;GO:0005634;GO:0005737;GO:0005829;GO:0005634;GO:0005634;GO:0005737;GO:0005829;
ENSMUSG00000027519	7155	2806.88	887.728	-1.66079	0.00311804	0.0329987	Down	Rab22a	19334	RAB22A, member RAS oncogene family	Q0PD34	K07891 RAB22; Ras-related protein Rab-22	mmu04144:Endocytosis;	GO:0000166;GO:0003924;GO:0003924;GO:0003924;GO:0005515;GO:0005525;GO:0005525;GO:0019003;GO:0000166;GO:0003924;GO:0003924;GO:0003924;GO:0005515;GO:0005525;GO:0005525;GO:0019003;	GO:0006886;GO:0006897;GO:0006897;GO:0015031;GO:0032482;GO:0097494;GO:0006886;GO:0006897;GO:0006897;GO:0015031;GO:0032482;GO:0097494;	GO:0005768;GO:0005769;GO:0005769;GO:0005886;GO:0015629;GO:0016020;GO:0031410;GO:0042995;GO:0045335;GO:0005768;GO:0005769;GO:0005769;GO:0005886;GO:0015629;GO:0016020;GO:0031410;GO:0042995;GO:0045335;
ENSMUSG00000027546	3729	44.6662	5.67163	-2.95975	3.22942e-06	9.09206e-05	Down	Atp9a	11981	ATPase, class II, type 9A	O70228	K01530 E7.6.2.1; phospholipid-translocating ATPase [EC:7.6.2.1]	NA	GO:0000166;GO:0000287;GO:0004012;GO:0005524;GO:0046872;GO:0000166;GO:0000287;GO:0004012;GO:0005524;GO:0046872;GO:0000166;GO:0000287;GO:0004012;GO:0005524;GO:0046872;GO:0000166;GO:0000287;GO:0004012;GO:0005524;GO:0046872;	GO:0006890;GO:0006897;GO:0015914;GO:0045332;GO:0006890;GO:0006897;GO:0015914;GO:0045332;GO:0006890;GO:0006897;GO:0015914;GO:0045332;GO:0006890;GO:0006897;GO:0015914;GO:0045332;	GO:0005768;GO:0005769;GO:0005794;GO:0005802;GO:0005802;GO:0005886;GO:0016020;GO:0016021;GO:0048471;GO:0055037;GO:0005768;GO:0005769;GO:0005794;GO:0005802;GO:0005802;GO:0005886;GO:0016020;GO:0016021;GO:0048471;GO:0055037;GO:0005768;GO:0005769;GO:0005794;GO:0005802;GO:0005802;GO:0005886;GO:0016020;GO:0016021;GO:0048471;GO:0055037;GO:0005768;GO:0005769;GO:0005794;GO:0005802;GO:0005802;GO:0005886;GO:…
ENSMUSG00000027605	3609	645.119	1142.15	0.823668	2.22878e-14	2.128e-12	Up	Acss2	60525	acyl-CoA synthetase short-chain family member 2	Q9QXG4	K01895 ACSS1_2; acetyl-CoA synthetase [EC:6.2.1.1]	mmu00010:Glycolysis / Gluconeogenesis;mmu00620:Pyruvate metabolism;mmu00630:Glyoxylate and dicarboxylate metabolism;mmu00640:Propanoate metabolism;mmu01100:Metabolic pathways;mmu01200:Carbon metabolism;	GO:0000166;GO:0003824;GO:0003987;GO:0003987;GO:0005524;GO:0016208;GO:0016874;	GO:0006085;GO:0008610;GO:0019413;GO:0019427;GO:0019542;	GO:0005654;GO:0005737;GO:0005737;GO:0005829;GO:0043231;
ENSMUSG00000027715	2965	946.827	622.799	-0.604308	3.13795e-06	8.85997e-05	Down	Ccna2	12428	cyclin A2	P51943	K06627 CCNA; cyclin-A	mmu04110:Cell cycle;mmu04152:AMPK signaling pathway;mmu04218:Cellular senescence;mmu04914:Progesterone-mediated oocyte maturation;mmu05161:Hepatitis B;mmu05165:Human papillomavirus infection;mmu05166:Human T-cell leukemia virus 1 infection;mmu05169:Epstein-Barr virus infection;mmu05200:Pathways in cancer;mmu05202:Transcriptional misregulation in cancer;mmu05203:Viral carcinogenesis;mmu05221:Acute…	GO:0004672;GO:0005515;GO:0016538;GO:0019901;GO:0019901;GO:0019901;GO:0019904;GO:0097472;	GO:0000079;GO:0000086;GO:0006275;GO:0007049;GO:0016572;GO:0044772;GO:0044843;GO:0045893;GO:0045893;GO:0048146;GO:0051301;	GO:0000307;GO:0000307;GO:0001939;GO:0001940;GO:0005634;GO:0005634;GO:0005634;GO:0005654;GO:0005737;GO:0005737;GO:0005737;GO:0005829;GO:0097124;GO:0097124;GO:0097124;
ENSMUSG00000027750	5223	13199.3	6016.99	-1.13343	1.43436e-55	1.57492e-52	Down	Postn	50706	periostin, osteoblast specific factor	A0A097BW18	NA	NA	GO:0005201;GO:0008201;GO:0046872;GO:0050839;GO:0005201;GO:0008201;GO:0046872;GO:0050839;GO:0005201;GO:0008201;GO:0046872;GO:0050839;	GO:0001953;GO:0003073;GO:0007155;GO:0007155;GO:0007155;GO:0008593;GO:0009888;GO:0014911;GO:0030198;GO:0030198;GO:0071307;GO:0071307;GO:1900025;GO:1904209;GO:1990138;GO:0001953;GO:0003073;GO:0007155;GO:0007155;GO:0007155;GO:0008593;GO:0009888;GO:0014911;GO:0030198;GO:0030198;GO:0071307;GO:0071307;GO:1900025;GO:1904209;GO:1990138;GO:0001953;GO:0003073;GO:0007155;GO:0007155;GO:0007155;GO:0008593;GO:…	GO:0005576;GO:0005615;GO:0005615;GO:0005615;GO:0005737;GO:0005794;GO:0005802;GO:0031012;GO:0031012;GO:0031594;GO:0062023;GO:0062023;GO:0062023;GO:0005576;GO:0005615;GO:0005615;GO:0005615;GO:0005737;GO:0005794;GO:0005802;GO:0031012;GO:0031012;GO:0031594;GO:0062023;GO:0062023;GO:0062023;GO:0005576;GO:0005615;GO:0005615;GO:0005615;GO:0005737;GO:0005794;GO:0005802;GO:0031012;GO:0031012;GO:0031594;GO:…
ENSMUSG00000027843	2757	233.579	393.61	0.75361	9.7985e-07	3.14124e-05	Up	Ptpn22	19260	protein tyrosine phosphatase, non-receptor type 22 (lymphoid)	P29352	K18024 PTPN12_18_22; tyrosine-protein phosphatase non-receptor type 12/18/22 [EC:3.1.3.48]	NA	GO:0004721;GO:0004725;GO:0005515;GO:0016787;GO:0016791;GO:0017124;GO:0019900;GO:0031625;GO:1990782;	GO:0002230;GO:0002376;GO:0002685;GO:0006470;GO:0006470;GO:0006914;GO:0010507;GO:0010628;GO:0010628;GO:0010629;GO:0010629;GO:0016311;GO:0030217;GO:0031663;GO:0032481;GO:0032496;GO:0032720;GO:0032720;GO:0032817;GO:0034141;GO:0034141;GO:0034145;GO:0034145;GO:0034157;GO:0034165;GO:0035549;GO:0035644;GO:0042307;GO:0043508;GO:0050730;GO:0050852;GO:0050856;GO:0050860;GO:0050868;GO:0050868;GO:0070374;GO:…	GO:0005634;GO:0005634;GO:0005737;GO:0005737;GO:0009898;GO:0009898;GO:0048471;
ENSMUSG00000027859	1187	50.269	105.214	1.06782	0.000864798	0.0116748	Up	Ngf	18049	nerve growth factor	Q6LDU8	K02582 NGFB; nerve growth factor, beta	mmu04010:MAPK signaling pathway;mmu04014:Ras signaling pathway;mmu04015:Rap1 signaling pathway;mmu04060:Cytokine-cytokine receptor interaction;mmu04151:PI3K-Akt signaling pathway;mmu04210:Apoptosis;mmu04722:Neurotrophin signaling pathway;mmu04750:Inflammatory mediator regulation of TRP channels;	GO:0004857;GO:0005102;GO:0005163;GO:0005163;GO:0008083;GO:0008191;GO:0030297;GO:0030414;GO:0004857;GO:0005102;GO:0005163;GO:0005163;GO:0008083;GO:0008191;GO:0030297;GO:0030414;	GO:0001934;GO:0001934;GO:0007169;GO:0007422;GO:0007422;GO:0007613;GO:0007613;GO:0007623;GO:0008284;GO:0008344;GO:0008625;GO:0010466;GO:0010628;GO:0010628;GO:0010976;GO:0010976;GO:0014042;GO:0014042;GO:0019233;GO:0019233;GO:0021675;GO:0030307;GO:0031175;GO:0031175;GO:0031398;GO:0031954;GO:0032092;GO:0038180;GO:0038180;GO:0038180;GO:0043388;GO:0043524;GO:0043524;GO:0043524;GO:0045664;GO:0045664;GO:…	GO:0005576;GO:0005615;GO:0005615;GO:0005615;GO:0008021;GO:0030424;GO:0030425;GO:0031410;GO:0044306;GO:0005576;GO:0005615;GO:0005615;GO:0005615;GO:0008021;GO:0030424;GO:0030425;GO:0031410;GO:0044306;
ENSMUSG00000027952	1194	841.699	1573.56	0.902119	1.94923e-17	2.46953e-15	Up	Pmvk	68603	phosphomevalonate kinase	Q3THA3	K13273 PMVK; phosphomevalonate kinase [EC:2.7.4.2]	mmu00900:Terpenoid backbone biosynthesis;mmu01100:Metabolic pathways;mmu04146:Peroxisome;	GO:0000166;GO:0004631;GO:0004631;GO:0004631;GO:0005524;GO:0016301;GO:0016740;GO:0000166;GO:0004631;GO:0004631;GO:0004631;GO:0005524;GO:0016301;GO:0016740;	GO:0006629;GO:0006694;GO:0006695;GO:0006695;GO:0008202;GO:0008203;GO:0008299;GO:0016126;GO:0016310;GO:0019287;GO:0019287;GO:0006629;GO:0006694;GO:0006695;GO:0006695;GO:0008202;GO:0008203;GO:0008299;GO:0016126;GO:0016310;GO:0019287;GO:0019287;	GO:0005737;GO:0005777;GO:0005829;GO:0005737;GO:0005777;GO:0005829;
ENSMUSG00000027955	6729	631.303	339.406	-0.895384	1.34259e-10	9.07176e-09	Down	Gask1b	68659	golgi associated kinase 1B	Q3UPI1	NA	NA	GO:0003674;	GO:0008150;	GO:0005794;GO:0016020;GO:0016021;
ENSMUSG00000027977	5570	145.689	248.787	0.773239	0.000796641	0.0108548	Up	Ndst3	83398	N-deacetylase/N-sulfotransferase (heparan glucosaminyl) 3	E9PZJ4	K02578 NDST3; heparan sulfate N-deacetylase/N-sulfotransferase NDST3 [EC:3.1.1.- 2.8.2.-]	mmu00534:Glycosaminoglycan biosynthesis - heparan sulfate / heparin;mmu01100:Metabolic pathways;	GO:0003824;GO:0008146;GO:0015016;GO:0015016;GO:0016740;GO:0016787;GO:0019213;GO:0019213;GO:0034483;GO:0042328;GO:0042328;GO:0003824;GO:0008146;GO:0015016;GO:0015016;GO:0016740;GO:0016787;GO:0019213;GO:0019213;GO:0034483;GO:0042328;GO:0042328;GO:0003824;GO:0008146;GO:0015016;GO:0015016;GO:0016740;GO:0016787;GO:0019213;GO:0019213;GO:0034483;GO:0042328;GO:0042328;	GO:0008152;GO:0015012;GO:0015012;GO:0015014;GO:0015014;GO:0008152;GO:0015012;GO:0015012;GO:0015014;GO:0015014;GO:0008152;GO:0015012;GO:0015012;GO:0015014;GO:0015014;	GO:0005794;GO:0016020;GO:0016021;GO:0005794;GO:0016020;GO:0016021;GO:0005794;GO:0016020;GO:0016021;
ENSMUSG00000027996	2003	3876.18	2243.44	-0.788768	1.02028e-19	1.63942e-17	Down	Sfrp2	20319	secreted frizzled-related protein 2	Q3UI35	K02176 SFRP2; secreted frizzled-related protein 2	mmu04310:Wnt signaling pathway;	GO:0005515;GO:0008047;GO:0017147;GO:0017147;GO:0048018;GO:0061133;GO:0005515;GO:0008047;GO:0017147;GO:0017147;GO:0048018;GO:0061133;	GO:0001569;GO:0001756;GO:0001843;GO:0002063;GO:0003151;GO:0003214;GO:0006915;GO:0007275;GO:0008284;GO:0008284;GO:0008285;GO:0008584;GO:0009952;GO:0010629;GO:0010667;GO:0010719;GO:0010950;GO:0010975;GO:0016055;GO:0021915;GO:0030111;GO:0030154;GO:0030178;GO:0030178;GO:0030199;GO:0030307;GO:0030308;GO:0030336;GO:0030514;GO:0030514;GO:0031668;GO:0033138;GO:0035567;GO:0036342;GO:0042127;GO:0042493;GO:…	GO:0005576;GO:0005615;GO:0005615;GO:0005615;GO:0005576;GO:0005615;GO:0005615;GO:0005615;
ENSMUSG00000028020	3029	856.783	1339.92	0.645496	1.16945e-06	3.68628e-05	Up	Glrb	14658	glycine receptor, beta subunit	A1KR23	K05196 GLRB; glycine receptor beta	mmu04080:Neuroactive ligand-receptor interaction;	GO:0004888;GO:0005216;GO:0005230;GO:0005254;GO:0005515;GO:0008144;GO:0016594;GO:0016594;GO:0016594;GO:0016594;GO:0016933;GO:0016933;GO:0016934;GO:0016934;GO:0016934;GO:0016934;GO:1904315;GO:1904315;GO:0004888;GO:0005216;GO:0005230;GO:0005254;GO:0005515;GO:0008144;GO:0016594;GO:0016594;GO:0016594;GO:0016594;GO:0016933;GO:0016933;GO:0016934;GO:0016934;GO:0016934;GO:0016934;GO:1904315;GO:1904315;	GO:0001964;GO:0001964;GO:0006811;GO:0006811;GO:0006821;GO:0007165;GO:0007218;GO:0007218;GO:0007218;GO:0007268;GO:0007268;GO:0007268;GO:0007340;GO:0007399;GO:0007399;GO:0007601;GO:0007628;GO:0034220;GO:0042391;GO:0042391;GO:0043200;GO:0050877;GO:0050905;GO:0051291;GO:0060012;GO:0060012;GO:0060012;GO:0060013;GO:0097112;GO:1902476;GO:1902476;GO:0001964;GO:0001964;GO:0006811;GO:0006811;GO:0006821;GO:…	GO:0005737;GO:0005783;GO:0005886;GO:0005887;GO:0005887;GO:0009897;GO:0016020;GO:0016020;GO:0016021;GO:0016935;GO:0030054;GO:0034707;GO:0042995;GO:0043005;GO:0045202;GO:0045202;GO:0045211;GO:0098690;GO:0098690;GO:0098690;GO:0098982;GO:0005737;GO:0005783;GO:0005886;GO:0005887;GO:0005887;GO:0009897;GO:0016020;GO:0016020;GO:0016021;GO:0016935;GO:0030054;GO:0034707;GO:0042995;GO:0043005;GO:0045202;GO:…
ENSMUSG00000028068	5756	380.249	198.364	-0.937907	8.12322e-09	3.85005e-07	Down	Iqgap3	404710	IQ motif containing GTPase activating protein 3	F8VQ29	K05767 IQGAP2_3; Ras GTPase-activating-like protein IQGAP2/3	mmu04810:Regulation of actin cytoskeleton;	GO:0005515;GO:0005516;GO:0017016;GO:0017048;GO:0070856;	GO:0000082;GO:0000187;GO:0001934;GO:0007265;GO:0008361;GO:0010628;GO:0010629;GO:0033601;GO:0070371;GO:0071310;	GO:0005737;GO:0005911;GO:0016328;
ENSMUSG00000028086	4473	1331.54	775.522	-0.779314	5.39613e-06	0.000144805	Down	Fbxw7	50754	F-box and WD-40 domain protein 7	D3YUA8	K10260 FBXW7; F-box and WD-40 domain protein 7	mmu04120:Ubiquitin mediated proteolysis;	GO:0005515;GO:0030332;GO:0030674;GO:0031625;GO:0042802;GO:0043130;GO:0050816;GO:0097027;GO:0005515;GO:0030332;GO:0030674;GO:0031625;GO:0042802;GO:0043130;GO:0050816;GO:0097027;GO:0005515;GO:0030332;GO:0030674;GO:0031625;GO:0042802;GO:0043130;GO:0050816;GO:0097027;	GO:0001570;GO:0006974;GO:0007062;GO:0007219;GO:0010629;GO:0010992;GO:0016567;GO:0030324;GO:0031146;GO:0031146;GO:0031398;GO:0031648;GO:0032876;GO:0034644;GO:0042752;GO:0042752;GO:0043161;GO:0043161;GO:0045741;GO:0050821;GO:0051443;GO:0070374;GO:0090049;GO:1901800;GO:1901800;GO:1903026;GO:1903146;GO:1903378;GO:1903378;GO:1903955;GO:2000060;GO:2000060;GO:2001205;GO:2001205;GO:0001570;GO:0006974;GO:…	GO:0005634;GO:0005634;GO:0005634;GO:0005654;GO:0005730;GO:0005730;GO:0005737;GO:0005737;GO:0005737;GO:0005739;GO:0005783;GO:0005794;GO:0016021;GO:0019005;GO:0032991;GO:0048471;GO:1990452;GO:0005634;GO:0005634;GO:0005634;GO:0005654;GO:0005730;GO:0005730;GO:0005737;GO:0005737;GO:0005737;GO:0005739;GO:0005783;GO:0005794;GO:0016021;GO:0019005;GO:0032991;GO:0048471;GO:1990452;GO:0005634;GO:0005634;GO:…
ENSMUSG00000028128	1872	458.947	979.588	1.09358	1.22033e-22	2.63592e-20	Up	F3	14066	coagulation factor III	P20352	K03901 F3; coagulation factor III (tissue factor)	mmu04610:Complement and coagulation cascades;mmu04933:AGE-RAGE signaling pathway in diabetic complications;	GO:0002020;GO:0004252;GO:0004896;GO:0005543;GO:0002020;GO:0004252;GO:0004896;GO:0005543;	GO:0001938;GO:0002541;GO:0006919;GO:0007596;GO:0007596;GO:0007599;GO:0010641;GO:0014911;GO:0016485;GO:0019221;GO:0045766;GO:0051897;GO:0001938;GO:0002541;GO:0006919;GO:0007596;GO:0007596;GO:0007599;GO:0010641;GO:0014911;GO:0016485;GO:0019221;GO:0045766;GO:0051897;	GO:0005615;GO:0005737;GO:0005886;GO:0009986;GO:0016020;GO:0016021;GO:0062023;GO:1905286;GO:0005615;GO:0005737;GO:0005886;GO:0009986;GO:0016020;GO:0016021;GO:0062023;GO:1905286;
ENSMUSG00000028175	3323	340.183	221.22	-0.62003	0.00305601	0.0324464	Down	Depdc1a	76131	DEP domain containing 1a	Q8CIG0	NA	NA	GO:0005096;GO:0005096;	GO:0007165;GO:0035556;GO:0045892;GO:0007165;GO:0035556;GO:0045892;	GO:0005634;GO:0005634;GO:0017053;GO:0017053;GO:0005634;GO:0005634;GO:0017053;GO:0017053;
ENSMUSG00000028179	1815	50.7739	166.715	1.7133	9.39154e-10	5.38013e-08	Up	Cth	107869	cystathionase (cystathionine gamma-lyase)	Q8VCN5	K01758 CTH; cystathionine gamma-lyase [EC:4.4.1.1]	mmu00260:Glycine, serine and threonine metabolism;mmu00270:Cysteine and methionine metabolism;mmu00450:Selenocompound metabolism;mmu01100:Metabolic pathways;mmu01230:Biosynthesis of amino acids;	GO:0003824;GO:0004121;GO:0004123;GO:0004123;GO:0004123;GO:0005515;GO:0005516;GO:0016829;GO:0016846;GO:0030170;GO:0030170;GO:0042802;GO:0044540;GO:0044540;GO:0044540;GO:0080146;	GO:0006749;GO:0008285;GO:0008652;GO:0018272;GO:0019343;GO:0019343;GO:0019344;GO:0019346;GO:0019346;GO:0030308;GO:0043066;GO:0043123;GO:0044524;GO:0044524;GO:0044524;GO:0050667;GO:0051092;GO:0051289;GO:0070814;GO:1904831;GO:1990830;GO:2001234;	GO:0005737;
ENSMUSG00000028212	3006	318.272	169.36	-0.910876	2.42245e-05	0.000557038	Down	Ccne2	12448	cyclin E2	A2API1	K06626 CCNE; G1/S-specific cyclin-E1	mmu04110:Cell cycle;mmu04114:Oocyte meiosis;mmu04115:p53 signaling pathway;mmu04151:PI3K-Akt signaling pathway;mmu04218:Cellular senescence;mmu04934:Cushing syndrome;mmu05161:Hepatitis B;mmu05162:Measles;mmu05165:Human papillomavirus infection;mmu05166:Human T-cell leukemia virus 1 infection;mmu05169:Epstein-Barr virus infection;mmu05200:Pathways in cancer;mmu05203:Viral carcinogenesis;mmu05206:M…	GO:0004672;GO:0016538;GO:0016538;GO:0019901;GO:0019901;GO:0004672;GO:0016538;GO:0016538;GO:0019901;GO:0019901;GO:0004672;GO:0016538;GO:0016538;GO:0019901;GO:0019901;	GO:0000079;GO:0000082;GO:0000082;GO:0000723;GO:0006270;GO:0007049;GO:0007129;GO:0044772;GO:0051301;GO:0051726;GO:0070192;GO:1903827;GO:0000079;GO:0000082;GO:0000082;GO:0000723;GO:0006270;GO:0007049;GO:0007129;GO:0044772;GO:0051301;GO:0051726;GO:0070192;GO:1903827;GO:0000079;GO:0000082;GO:0000082;GO:0000723;GO:0006270;GO:0007049;GO:0007129;GO:0044772;GO:0051301;GO:0051726;GO:0070192;GO:1903827;	GO:0000307;GO:0005634;GO:0005737;GO:0005813;GO:0097134;GO:0097135;GO:0097135;GO:0097135;GO:0000307;GO:0005634;GO:0005737;GO:0005813;GO:0097134;GO:0097135;GO:0097135;GO:0097135;GO:0000307;GO:0005634;GO:0005737;GO:0005813;GO:0097134;GO:0097135;GO:0097135;GO:0097135;
ENSMUSG00000028238	2539	694.758	381.694	-0.86449	3.5086e-09	1.78491e-07	Down	Atp6v0d2	242341	ATPase, H+ transporting, lysosomal V0 subunit D2	Q80SY3	K02146 ATPeV0D; V-type H+-transporting ATPase subunit d	mmu00190:Oxidative phosphorylation;mmu01100:Metabolic pathways;mmu04142:Lysosome;mmu04145:Phagosome;mmu04721:Synaptic vesicle cycle;mmu04966:Collecting duct acid secretion;mmu05152:Tuberculosis;mmu05165:Human papillomavirus infection;mmu05203:Viral carcinogenesis;mmu05323:Rheumatoid arthritis;	GO:0008553;GO:0015078;GO:0046961;	GO:0006811;GO:0007034;GO:0007035;GO:0015991;	GO:0005765;GO:0005768;GO:0005769;GO:0005769;GO:0016020;GO:0016324;GO:0016471;GO:0016471;GO:0033179;GO:0033181;
ENSMUSG00000028262	3654	16.4514	0.872763	-4.14459	0.00202604	0.0236659	Down	Clca3a2	80797	chloride channel accessory 3A2	Q9EQR4	K05030 CLCA3_4; calcium-activated chloride channel regulator 3/4	mmu04924:Renin secretion;mmu04972:Pancreatic secretion;	GO:0005229;GO:0005229;	GO:0006821;GO:0043276;GO:0097192;	GO:0005887;GO:0005887;
ENSMUSG00000028312	5404	1120.82	695.071	-0.689652	4.83664e-10	2.8836e-08	Down	Smc2	14211	structural maintenance of chromosomes 2	Q8CG48	K06674 SMC2; structural maintenance of chromosome 2	NA	GO:0000166;GO:0003697;GO:0005515;GO:0005524;GO:0046982;GO:0000166;GO:0003697;GO:0005515;GO:0005524;GO:0046982;	GO:0000012;GO:0007049;GO:0007076;GO:0010032;GO:0030261;GO:0045132;GO:0051276;GO:0051301;GO:0051383;GO:0000012;GO:0007049;GO:0007076;GO:0010032;GO:0030261;GO:0045132;GO:0051276;GO:0051301;GO:0051383;	GO:0000228;GO:0000793;GO:0000793;GO:0000796;GO:0000796;GO:0000796;GO:0005634;GO:0005634;GO:0005694;GO:0005730;GO:0005737;GO:0000228;GO:0000793;GO:0000793;GO:0000796;GO:0000796;GO:0000796;GO:0005634;GO:0005634;GO:0005694;GO:0005730;GO:0005737;
ENSMUSG00000028413	3983	10928.3	7064.89	-0.629374	4.19751e-23	9.38489e-21	Down	B4galt1	14595	UDP-Gal:betaGlcNAc beta 1,4- galactosyltransferase, polypeptide 1	Q3U478	K07966 B4GALT1; beta-1,4-galactosyltransferase 1 [EC:2.4.1.22 2.4.1.90 2.4.1.38 2.4.1.-]	mmu00052:Galactose metabolism;mmu00510:N-Glycan biosynthesis;mmu00513:Various types of N-glycan biosynthesis;mmu00514:Other types of O-glycan biosynthesis;mmu00515:Mannose type O-glycan biosynthesis;mmu00533:Glycosaminoglycan biosynthesis - keratan sulfate;mmu00601:Glycosphingolipid biosynthesis - lacto and neolacto series;mmu01100:Metabolic pathways;	GO:0003831;GO:0003831;GO:0003831;GO:0003945;GO:0004461;GO:0005515;GO:0008092;GO:0008378;GO:0016740;GO:0016757;GO:0030145;GO:0035250;GO:0042803;GO:0043014;GO:0046872;GO:0048487;GO:0003831;GO:0003831;GO:0003831;GO:0003945;GO:0004461;GO:0005515;GO:0008092;GO:0008378;GO:0016740;GO:0016757;GO:0030145;GO:0035250;GO:0042803;GO:0043014;GO:0046872;GO:0048487;	GO:0002064;GO:0002526;GO:0005975;GO:0005989;GO:0006012;GO:0006486;GO:0006487;GO:0007155;GO:0007339;GO:0007339;GO:0007341;GO:0008285;GO:0008285;GO:0009101;GO:0009312;GO:0009312;GO:0030198;GO:0030879;GO:0042060;GO:0042127;GO:0043065;GO:0045136;GO:0048754;GO:0050900;GO:0051260;GO:0051270;GO:0060046;GO:0060054;GO:0060055;GO:0060058;GO:0002064;GO:0002526;GO:0005975;GO:0005989;GO:0006012;GO:0006486;GO:…	GO:0000138;GO:0005576;GO:0005615;GO:0005794;GO:0005794;GO:0005886;GO:0009897;GO:0009986;GO:0009986;GO:0016020;GO:0016021;GO:0016323;GO:0030057;GO:0031526;GO:0042995;GO:0000138;GO:0005576;GO:0005615;GO:0005794;GO:0005794;GO:0005886;GO:0009897;GO:0009986;GO:0009986;GO:0016020;GO:0016021;GO:0016323;GO:0030057;GO:0031526;GO:0042995;
ENSMUSG00000028542	3479	380.634	1028.43	1.43363	2.89734e-29	9.78854e-27	Up	Slc6a9	14664	solute carrier family 6 (neurotransmitter transporter, glycine), member 9	P28571	K05038 SLC6A5_9; solute carrier family 6 (neurotransmitter transporter, glycine) member 5/9	mmu04721:Synaptic vesicle cycle;	GO:0005283;GO:0005328;GO:0015187;GO:0015187;GO:0015293;	GO:0001504;GO:0006836;GO:0006865;GO:0015816;GO:0060092;GO:0061537;GO:0061537;	GO:0005886;GO:0005886;GO:0005887;GO:0014069;GO:0016020;GO:0016021;GO:0030285;GO:0032279;GO:0098686;GO:0098688;GO:0099055;GO:0099056;
ENSMUSG00000028558	2155	77.1689	36.8313	-1.06557	0.00190689	0.0225136	Down	Calr4	108802	calreticulin 4	A2A8Z3	NA	NA	GO:0003674;GO:0003674;GO:0003674;	GO:0008150;GO:0008150;GO:0008150;	GO:0005575;GO:0005575;GO:0005575;
ENSMUSG00000028613	7391	172.104	357.777	1.05779	0.00013053	0.00240204	Up	Lrp8	16975	low density lipoprotein receptor-related protein 8, apolipoprotein e receptor	B1AXJ5	K20052 LRP8; low-density lipoprotein receptor-related protein 8	NA	GO:0001540;GO:0005041;GO:0005509;GO:0005515;GO:0008035;GO:0019894;GO:0030229;GO:0034185;GO:0038025;GO:0047485;GO:0048306;GO:0001540;GO:0005041;GO:0005509;GO:0005515;GO:0008035;GO:0019894;GO:0030229;GO:0034185;GO:0038025;GO:0047485;GO:0048306;GO:0001540;GO:0005041;GO:0005509;GO:0005515;GO:0008035;GO:0019894;GO:0030229;GO:0034185;GO:0038025;GO:0047485;GO:0048306;GO:0001540;GO:0005041;GO:0005509;GO:…	GO:0000122;GO:0006897;GO:0007268;GO:0021517;GO:0021541;GO:0021766;GO:0021819;GO:0032793;GO:0038026;GO:0042981;GO:0045088;GO:0045860;GO:0048813;GO:0050731;GO:0050804;GO:0061003;GO:0061098;GO:1900006;GO:0000122;GO:0006897;GO:0007268;GO:0021517;GO:0021541;GO:0021766;GO:0021819;GO:0032793;GO:0038026;GO:0042981;GO:0045088;GO:0045860;GO:0048813;GO:0050731;GO:0050804;GO:0061003;GO:0061098;GO:1900006;GO:…	GO:0005576;GO:0005615;GO:0005875;GO:0005886;GO:0005901;GO:0009986;GO:0014069;GO:0016020;GO:0016021;GO:0030424;GO:0030425;GO:0043025;GO:0043235;GO:0005576;GO:0005615;GO:0005875;GO:0005886;GO:0005901;GO:0009986;GO:0014069;GO:0016020;GO:0016021;GO:0030424;GO:0030425;GO:0043025;GO:0043235;GO:0005576;GO:0005615;GO:0005875;GO:0005886;GO:0005901;GO:0009986;GO:0014069;GO:0016020;GO:0016021;GO:0030424;GO:…
ENSMUSG00000028780	5491	1325.71	2927.02	1.14251	6.21098e-41	4.30715e-38	Up	Sema3c	20348	sema domain, immunoglobulin domain (Ig), short basic domain, secreted, (semaphorin) 3C	Q62181	K06840 SEMA3; semaphorin 3	mmu04360:Axon guidance;	GO:0030215;GO:0030215;GO:0038191;GO:0045499;	GO:0001755;GO:0001755;GO:0001756;GO:0001974;GO:0003148;GO:0003148;GO:0003151;GO:0003215;GO:0003350;GO:0007275;GO:0007399;GO:0007411;GO:0007507;GO:0009791;GO:0021915;GO:0030154;GO:0030335;GO:0048843;GO:0050919;GO:0060174;GO:0060666;GO:0071526;GO:0071526;GO:0140074;GO:1905312;	GO:0005576;GO:0005615;GO:0005615;GO:0005615;GO:0005887;GO:0062023;
ENSMUSG00000028838	4126	90.8207	170.531	0.908176	0.000615085	0.00883848	Up	Extl1	56219	exostoses (multiple)-like 1	Q9JKV7	K02368 EXTL1; alpha-1,4-N-acetylglucosaminyltransferase EXTL1 [EC:2.4.1.224]	mmu00534:Glycosaminoglycan biosynthesis - heparan sulfate / heparin;mmu01100:Metabolic pathways;	GO:0016740;GO:0016757;GO:0050508;GO:0016740;GO:0016757;GO:0050508;	GO:0006486;GO:0006486;	GO:0005783;GO:0016020;GO:0016021;GO:0005783;GO:0016020;GO:0016021;
ENSMUSG00000028893	3475	408.231	844.592	1.04914	3.86296e-15	3.97643e-13	Up	Sesn2	230784	sestrin 2	P58043	K20394 SESN2; sestrin 2	mmu04115:p53 signaling pathway;mmu04150:mTOR signaling pathway;mmu04211:Longevity regulating pathway;	GO:0005092;GO:0005515;GO:0016491;GO:0016684;GO:0016684;GO:0051920;GO:0070728;GO:0070728;	GO:0001932;GO:0001932;GO:0006111;GO:0006635;GO:0007005;GO:0009749;GO:0009749;GO:0016239;GO:0016239;GO:0030308;GO:0030330;GO:0030330;GO:0032042;GO:0032868;GO:0032868;GO:0034198;GO:0034599;GO:0036091;GO:0042149;GO:0042593;GO:0043491;GO:0046323;GO:0055114;GO:0070328;GO:0071230;GO:0071230;GO:0071230;GO:0071233;GO:0071233;GO:0072593;GO:1900182;GO:1901031;GO:1902010;GO:1902010;GO:1904262;GO:1904262;GO:…	GO:0005634;GO:0005737;GO:0005737;GO:0031588;GO:0031932;GO:0031932;GO:0061700;GO:0061700;GO:1990316;
ENSMUSG00000028950	2863	316.461	161.51	-0.968022	4.48988e-07	1.56091e-05	Down	Tas1r1	110326	taste receptor, type 1, member 1	Q99PG6	K04624 TAS1R1; taste receptor type 1 member 1	mmu04742:Taste transduction;	GO:0004930;GO:0008527;GO:0038023;GO:0004930;GO:0008527;GO:0038023;	GO:0007165;GO:0007186;GO:0050896;GO:0050909;GO:0050917;GO:0050917;GO:0007165;GO:0007186;GO:0050896;GO:0050909;GO:0050917;GO:0050917;	GO:0005886;GO:0005887;GO:0016020;GO:0016021;GO:0005886;GO:0005887;GO:0016020;GO:0016021;
ENSMUSG00000028957	5999	870.449	1495.53	0.780737	1.69106e-08	7.50218e-07	Up	Per3	18628	period circadian clock 3	O70361	K21945 PER3; period circadian protein 3	mmu04710:Circadian rhythm;mmu04713:Circadian entrainment;	GO:0000976;GO:0001222;GO:0005515;GO:0008134;GO:0019900;GO:0031625;	GO:0000122;GO:0000122;GO:0000122;GO:0007623;GO:0009416;GO:0032922;GO:0043153;GO:0045187;GO:0045187;GO:0048511;GO:0050821;	GO:0005634;GO:0005634;GO:0005737;GO:0005737;
ENSMUSG00000028967	3043	2258.49	1191.57	-0.922361	1.66915e-21	3.14182e-19	Down	Errfi1	74155	ERBB receptor feedback inhibitor 1	Q99JZ7	NA	NA	GO:0005515;GO:0017124;GO:0019900;GO:0019901;GO:0031267;GO:0005515;GO:0017124;GO:0019900;GO:0019901;GO:0031267;	GO:0007175;GO:0007175;GO:0031098;GO:0031953;GO:0032691;GO:0032966;GO:0042059;GO:0042059;GO:0042059;GO:0042536;GO:0043589;GO:0045616;GO:0045616;GO:0048286;GO:0050732;GO:0060426;GO:0060428;GO:0061469;GO:0070373;GO:1903243;GO:0007175;GO:0007175;GO:0031098;GO:0031953;GO:0032691;GO:0032966;GO:0042059;GO:0042059;GO:0042059;GO:0042536;GO:0043589;GO:0045616;GO:0045616;GO:0048286;GO:0050732;GO:0060426;GO:…	GO:0005634;GO:0005737;GO:0005829;GO:0005886;GO:0016020;GO:0031234;GO:0031234;GO:0005634;GO:0005737;GO:0005829;GO:0005886;GO:0016020;GO:0031234;GO:0031234;
ENSMUSG00000028972	1567	7.12591	53.927	2.92145	1.54525e-07	5.91867e-06	Up	Car6	12353	carbonic anhydrase 6	Q3V197	K01672 CA; carbonic anhydrase [EC:4.2.1.1]	mmu00910:Nitrogen metabolism;mmu01100:Metabolic pathways;	GO:0003674;GO:0004089;GO:0008270;GO:0016829;GO:0046872;GO:0003674;GO:0004089;GO:0008270;GO:0016829;GO:0046872;GO:0003674;GO:0004089;GO:0008270;GO:0016829;GO:0046872;	GO:0001580;GO:0006730;GO:0001580;GO:0006730;GO:0001580;GO:0006730;	GO:0005576;GO:0005615;GO:0005615;GO:0005737;GO:0005829;GO:0005576;GO:0005615;GO:0005615;GO:0005737;GO:0005829;GO:0005576;GO:0005615;GO:0005615;GO:0005737;GO:0005829;
ENSMUSG00000028989	2157	578.339	87.7821	-2.72204	6.62841e-44	5.13741e-41	Down	Angptl7	654812	angiopoietin-like 7	Q8R1Q3	NA	NA	NA	NA	GO:0005575;GO:0005576;
ENSMUSG00000029095	3564	90.7824	29.7015	-1.6106	2.22693e-05	0.00051841	Down	Ablim2	231148	actin-binding LIM protein 2	E9Q0W6	K07520 ABLIM; actin-binding LIM protein	mmu04360:Axon guidance;	GO:0003779;GO:0046872;GO:0051015;GO:0003779;GO:0046872;GO:0051015;GO:0003779;GO:0046872;GO:0051015;	GO:0006351;GO:0007010;GO:0030032;GO:0030036;GO:0045944;GO:0006351;GO:0007010;GO:0030032;GO:0030036;GO:0045944;GO:0006351;GO:0007010;GO:0030032;GO:0030036;GO:0045944;	GO:0005737;GO:0015629;GO:0015629;GO:0030016;GO:0005737;GO:0015629;GO:0015629;GO:0030016;GO:0005737;GO:0015629;GO:0015629;GO:0030016;
ENSMUSG00000029096	2750	658.696	1056.7	0.682163	4.61548e-08	1.8991e-06	Up	Htra3	78558	HtrA serine peptidase 3	Q9D236	K08785 HTRA3; HtrA serine peptidase 3 [EC:3.4.21.-]	NA	GO:0004175;GO:0004252;GO:0005515;GO:0005520;GO:0008233;GO:0008236;GO:0008236;GO:0016787;	GO:0006508;GO:0006508;GO:0030512;GO:0030514;	GO:0005576;
ENSMUSG00000029298	5043	7.48995	37.7948	2.33803	5.58458e-05	0.00115696	Up	Gbp9	236573	guanylate-binding protein 9	Q8BTS3	K20908 GBP6; guanylate-binding protein 6	NA	GO:0003924;GO:0005525;	GO:0042832;GO:0042832;GO:0044406;GO:0050830;GO:0050830;GO:0071346;GO:0071346;	GO:0020005;GO:0020005;GO:0031410;GO:0031410;
ENSMUSG00000029381	6765	383.474	201.111	-0.929147	5.15667e-06	0.00013923	Down	Shroom3	27428	shroom family member 3	A0A286YDQ8	K18625 SHROOM; protein Shroom	NA	GO:0003779;GO:0051015;GO:0003779;GO:0051015;GO:0003779;GO:0051015;GO:0003779;GO:0051015;	GO:0000902;GO:0001843;GO:0002064;GO:0002066;GO:0007015;GO:0007275;GO:0007389;GO:0008360;GO:0030036;GO:0030036;GO:0000902;GO:0001843;GO:0002064;GO:0002066;GO:0007015;GO:0007275;GO:0007389;GO:0008360;GO:0030036;GO:0030036;GO:0000902;GO:0001843;GO:0002064;GO:0002066;GO:0007015;GO:0007275;GO:0007389;GO:0008360;GO:0030036;GO:0030036;GO:0000902;GO:0001843;GO:0002064;GO:0002066;GO:0007015;GO:0007275;GO:…	GO:0005737;GO:0005856;GO:0005874;GO:0005912;GO:0005912;GO:0016324;GO:0016324;GO:0030054;GO:0030864;GO:0043296;GO:0043296;GO:0045177;GO:0005737;GO:0005856;GO:0005874;GO:0005912;GO:0005912;GO:0016324;GO:0016324;GO:0030054;GO:0030864;GO:0043296;GO:0043296;GO:0045177;GO:0005737;GO:0005856;GO:0005874;GO:0005912;GO:0005912;GO:0016324;GO:0016324;GO:0030054;GO:0030864;GO:0043296;GO:0043296;GO:0045177;GO:…
ENSMUSG00000029414	6961	304.512	166.208	-0.870519	4.18941e-06	0.000115239	Down	Kntc1	208628	kinetochore associated 1	Q8C3Y4	K11577 KNTC1; kinetochore-associated protein 1	NA	GO:0003674;	GO:0007049;GO:0007093;GO:0051301;	GO:0000775;GO:0000776;GO:0000922;GO:0005634;GO:0005694;GO:0005737;GO:0005828;GO:0005829;GO:0005856;GO:0005886;GO:0015629;GO:1990423;
ENSMUSG00000029446	2877	440.34	683.547	0.633509	6.69659e-07	2.25663e-05	Up	Psph	100678	phosphoserine phosphatase	Q99LS3	K01079 serB; phosphoserine phosphatase [EC:3.1.3.3]	mmu00260:Glycine, serine and threonine metabolism;mmu01100:Metabolic pathways;mmu01200:Carbon metabolism;mmu01230:Biosynthesis of amino acids;	GO:0000287;GO:0000287;GO:0004647;GO:0004647;GO:0005509;GO:0016787;GO:0016791;GO:0042803;GO:0046872;	GO:0006563;GO:0006564;GO:0008652;GO:0016311;	GO:0005737;GO:0043005;
ENSMUSG00000029650	2434	85.8681	142.29	0.730638	0.00412602	0.0415313	Up	Slc46a3	71706	solute carrier family 46, member 3	Q9DC26	K20840 SLC46A3; MFS transporter, PCFT/HCP family, solute carrier family 46, member 3	NA	GO:0003674;	GO:0008150;GO:0055085;	GO:0016020;GO:0016021;
ENSMUSG00000029752	2016	969.625	2956.64	1.60823	1.44467e-52	1.46423e-49	Up	Asns	27053	asparagine synthetase	Q61024	K01953 asnB; asparagine synthase (glutamine-hydrolysing) [EC:6.3.5.4]	mmu00250:Alanine, aspartate and glutamate metabolism;mmu01100:Metabolic pathways;mmu01230:Biosynthesis of amino acids;	GO:0000166;GO:0004066;GO:0004066;GO:0005524;GO:0016874;GO:0042803;GO:0048037;	GO:0006529;GO:0006529;GO:0006541;GO:0008652;GO:0042149;GO:0043066;GO:0045931;	GO:0005829;GO:0005829;
ENSMUSG00000029838	2558	77.372	143.919	0.89586	0.000308232	0.00495277	Up	Ptn	19242	pleiotrophin	P63089	K16642 PTN; pleiotrophin	NA	GO:0004864;GO:0005178;GO:0005539;GO:0008083;GO:0008083;GO:0008201;GO:0019901;GO:0035373;GO:0035374;GO:0038085;GO:0043394;GO:1904399;	GO:0001503;GO:0002232;GO:0002690;GO:0007229;GO:0007406;GO:0007612;GO:0007613;GO:0008284;GO:0008360;GO:0010811;GO:0010976;GO:0010996;GO:0016525;GO:0030282;GO:0030336;GO:0030501;GO:0031641;GO:0042246;GO:0043065;GO:0043113;GO:0043932;GO:0044849;GO:0045597;GO:0045837;GO:0046697;GO:0048167;GO:0048477;GO:0048714;GO:0050680;GO:0051781;GO:0060221;GO:0060253;GO:0072201;GO:0140059;GO:1900006;GO:1900272;GO:…	GO:0005576;GO:0005576;GO:0005576;GO:0005604;GO:0005615;GO:0005737;GO:0005783;GO:0009986;GO:0016020;GO:0031012;GO:0031594;GO:0032991;GO:0048471;GO:0098793;GO:0098794;
ENSMUSG00000030088	4175	669.597	311.35	-1.10563	3.74075e-18	5.13418e-16	Down	Aldh1l1	107747	aldehyde dehydrogenase 1 family, member L1	Q8R0Y6	K00289 ALDH1L; formyltetrahydrofolate dehydrogenase [EC:1.5.1.6]	mmu00670:One carbon pool by folate;	GO:0003824;GO:0004029;GO:0004030;GO:0005515;GO:0016155;GO:0016491;GO:0016620;GO:0016742;GO:0033721;GO:0044877;	GO:0006730;GO:0009058;GO:0009258;	GO:0005737;GO:0005739;GO:0005829;GO:0032991;
ENSMUSG00000030098	5520	78.4764	37.7293	-1.05152	0.00360905	0.0371797	Down	Grip2	243547	glutamate receptor interacting protein 2	G3XA20	K20251 GRIP; glutamate receptor-interacting protein	NA	GO:0008022;GO:0035254;	GO:0007219;GO:0014042;GO:0014824;GO:0015031;GO:0045777;GO:0098887;GO:0098887;GO:0098887;GO:0099003;GO:0099003;GO:1904719;GO:2000463;	GO:0005737;GO:0005886;GO:0014069;GO:0016020;GO:0030425;GO:0043198;GO:0044309;GO:0045211;GO:0098978;GO:0098978;
ENSMUSG00000030268	7833	681.425	1286.91	0.916813	3.09747e-18	4.29603e-16	Up	Bcat1	12035	branched chain aminotransferase 1, cytosolic	Q3TJN1	K00826 E2.6.1.42; branched-chain amino acid aminotransferase [EC:2.6.1.42]	mmu00270:Cysteine and methionine metabolism;mmu00280:Valine, leucine and isoleucine degradation;mmu00290:Valine, leucine and isoleucine biosynthesis;mmu00770:Pantothenate and CoA biosynthesis;mmu01100:Metabolic pathways;mmu01210:2-Oxocarboxylic acid metabolism;mmu01230:Biosynthesis of amino acids;	GO:0003824;GO:0004084;GO:0004084;GO:0004084;GO:0008483;GO:0016740;GO:0042802;GO:0052654;GO:0052655;GO:0052656;GO:0003824;GO:0004084;GO:0004084;GO:0004084;GO:0008483;GO:0016740;GO:0042802;GO:0052654;GO:0052655;GO:0052656;GO:0003824;GO:0004084;GO:0004084;GO:0004084;GO:0008483;GO:0016740;GO:0042802;GO:0052654;GO:0052655;GO:0052656;	GO:0008652;GO:0009081;GO:0009082;GO:0009083;GO:0009098;GO:0009099;GO:0008652;GO:0009081;GO:0009082;GO:0009083;GO:0009098;GO:0009099;GO:0008652;GO:0009081;GO:0009082;GO:0009083;GO:0009098;GO:0009099;	GO:0005737;GO:0005739;GO:0005739;GO:0005829;GO:0005737;GO:0005739;GO:0005739;GO:0005829;GO:0005737;GO:0005739;GO:0005739;GO:0005829;
ENSMUSG00000030346	2233	83.2499	32.98	-1.32786	0.000557038	0.00811895	Down	Rad51ap1	19362	RAD51 associated protein 1	A0A0R4J1G4	K20778 RAD51AP1; RAD51-associated protein 1	NA	GO:0003677;GO:0003690;GO:0003697;GO:0003723;GO:0003677;GO:0003690;GO:0003697;GO:0003723;GO:0003677;GO:0003690;GO:0003697;GO:0003723;	GO:0000724;GO:0006281;GO:0006310;GO:0006974;GO:0010569;GO:0036297;GO:0071479;GO:0000724;GO:0006281;GO:0006310;GO:0006974;GO:0010569;GO:0036297;GO:0071479;GO:0000724;GO:0006281;GO:0006310;GO:0006974;GO:0010569;GO:0036297;GO:0071479;	GO:0000790;GO:0005634;GO:0005634;GO:0032991;GO:0000790;GO:0005634;GO:0005634;GO:0032991;GO:0000790;GO:0005634;GO:0005634;GO:0032991;
ENSMUSG00000030399	2742	2834.15	1520.96	-0.898554	1.46842e-23	3.45498e-21	Down	Ckm	12715	creatine kinase, muscle	P07310	K00933 E2.7.3.2; creatine kinase [EC:2.7.3.2]	mmu00330:Arginine and proline metabolism;mmu01100:Metabolic pathways;	GO:0000166;GO:0003824;GO:0004111;GO:0004111;GO:0004111;GO:0005524;GO:0016301;GO:0016740;GO:0016772;GO:0000166;GO:0003824;GO:0004111;GO:0004111;GO:0004111;GO:0005524;GO:0016301;GO:0016740;GO:0016772;	GO:0006603;GO:0016310;GO:0046314;GO:0046314;GO:0046314;GO:0006603;GO:0016310;GO:0046314;GO:0046314;GO:0046314;	GO:0005615;GO:0005615;GO:0005737;GO:0005615;GO:0005615;GO:0005737;
ENSMUSG00000030498	3158	320.864	539.65	0.750446	9.54689e-07	3.06804e-05	Up	Gas2	14453	growth arrest specific 2	Q9D699	NA	NA	GO:0008017;GO:0008017;	GO:0001544;GO:0001547;GO:0006915;GO:0007049;GO:0007050;GO:0008360;GO:0008593;GO:0030728;GO:0071711;GO:0001544;GO:0001547;GO:0006915;GO:0007049;GO:0007050;GO:0008360;GO:0008593;GO:0030728;GO:0071711;	GO:0005737;GO:0005856;GO:0016020;GO:0005737;GO:0005856;GO:0016020;
ENSMUSG00000030528	4770	182.496	112.077	-0.701364	0.00096631	0.0127704	Down	Blm	12144	Bloom syndrome, RecQ like helicase	E9PZ97	K10901 BLM; bloom syndrome protein [EC:3.6.4.12]	mmu03440:Homologous recombination;mmu03460:Fanconi anemia pathway;	GO:0000166;GO:0000400;GO:0000403;GO:0000405;GO:0002039;GO:0003676;GO:0003677;GO:0003678;GO:0003697;GO:0003824;GO:0004003;GO:0004386;GO:0005515;GO:0005524;GO:0008026;GO:0008094;GO:0008270;GO:0009378;GO:0009378;GO:0016787;GO:0016818;GO:0016887;GO:0036310;GO:0042803;GO:0043140;GO:0043140;GO:0046872;GO:0051880;GO:0061749;GO:0061821;GO:1905773;GO:0000166;GO:0000400;GO:0000403;GO:0000405;GO:0002039;GO:…	GO:0000079;GO:0000723;GO:0000723;GO:0000724;GO:0000729;GO:0006260;GO:0006260;GO:0006268;GO:0006281;GO:0006281;GO:0006310;GO:0006974;GO:0007095;GO:0010165;GO:0031297;GO:0032508;GO:0032508;GO:0035690;GO:0044237;GO:0044806;GO:0044806;GO:0044806;GO:0044806;GO:0045893;GO:0045910;GO:0045950;GO:0045950;GO:0046632;GO:0046641;GO:0051098;GO:0051259;GO:0051260;GO:0051276;GO:0051782;GO:0061820;GO:0070244;GO:…	GO:0000228;GO:0000781;GO:0000781;GO:0000800;GO:0001673;GO:0005634;GO:0005634;GO:0005657;GO:0005657;GO:0005694;GO:0005730;GO:0005737;GO:0005737;GO:0005829;GO:0016363;GO:0016605;GO:0045120;GO:0000228;GO:0000781;GO:0000781;GO:0000800;GO:0001673;GO:0005634;GO:0005634;GO:0005657;GO:0005657;GO:0005694;GO:0005730;GO:0005737;GO:0005737;GO:0005829;GO:0016363;GO:0016605;GO:0045120;
ENSMUSG00000030562	3921	2607.38	1486.86	-0.810574	5.46722e-19	8.28002e-17	Down	Nox4	50490	NADPH oxidase 4	Q9JHI8	K21423 NOX4; NADPH oxidase 4 [EC:1.6.3.-]	mmu04933:AGE-RAGE signaling pathway in diabetic complications;	GO:0016174;GO:0016175;GO:0016175;GO:0016491;GO:0050664;GO:0072341;GO:1990782;GO:0016174;GO:0016175;GO:0016175;GO:0016491;GO:0050664;GO:0072341;GO:1990782;	GO:0000902;GO:0003015;GO:0003015;GO:0006801;GO:0006952;GO:0007569;GO:0008285;GO:0010467;GO:0014911;GO:0042554;GO:0042554;GO:0043065;GO:0043406;GO:0045453;GO:0050667;GO:0051496;GO:0051897;GO:0055007;GO:0055114;GO:0055114;GO:0061098;GO:0070374;GO:0071333;GO:0072593;GO:0072593;GO:2000379;GO:2000573;GO:0000902;GO:0003015;GO:0003015;GO:0006801;GO:0006952;GO:0007569;GO:0008285;GO:0010467;GO:0014911;GO:…	GO:0001725;GO:0005634;GO:0005634;GO:0005739;GO:0005783;GO:0005886;GO:0005925;GO:0016020;GO:0016021;GO:0016324;GO:0030054;GO:0043020;GO:0043020;GO:0048471;GO:0048471;GO:0071944;GO:0097038;GO:0001725;GO:0005634;GO:0005634;GO:0005739;GO:0005783;GO:0005886;GO:0005925;GO:0016020;GO:0016021;GO:0016324;GO:0030054;GO:0043020;GO:0043020;GO:0048471;GO:0048471;GO:0071944;GO:0097038;
ENSMUSG00000030708	2592	5.73183	36.2539	2.65711	5.08437e-05	0.00106845	Up	Dnajb13	69387	DnaJ heat shock protein family (Hsp40) member B13	Q80Y75	K09519 DNAJB13; DnaJ homolog subfamily B member 13	NA	GO:0005515;GO:0051082;GO:0051087;	GO:0006457;GO:0030030;GO:0051085;GO:1904158;GO:1904158;	GO:0005737;GO:0005829;GO:0005929;GO:0005930;GO:0031514;GO:0031514;GO:0031514;GO:0036126;GO:0036126;GO:0042995;GO:0097224;
ENSMUSG00000030772	3359	1486.4	2275.93	0.614752	5.21857e-11	3.58124e-09	Up	Dkk3	50781	dickkopf WNT signaling pathway inhibitor 3	Q9QUN9	NA	NA	GO:0039706;GO:0048019;	GO:0007275;GO:0016055;GO:0030178;GO:0032348;GO:0045892;GO:0090090;GO:0090090;GO:2000065;	GO:0005576;GO:0005615;GO:0005615;GO:0005615;
ENSMUSG00000030785	680	160.635	283.512	0.819664	5.46366e-06	0.000146023	Up	Cox6a2	12862	cytochrome c oxidase subunit 6A2	P43023	K02266 COX6A; cytochrome c oxidase subunit 6a	mmu00190:Oxidative phosphorylation;mmu01100:Metabolic pathways;mmu04260:Cardiac muscle contraction;mmu04714:Thermogenesis;mmu04932:Non-alcoholic fatty liver disease (NAFLD);mmu05010:Alzheimer disease;mmu05012:Parkinson disease;mmu05016:Huntington disease;	GO:0004129;GO:0030234;	GO:0006123;GO:0009060;	GO:0005739;GO:0005743;GO:0005751;GO:0005751;GO:0016020;
ENSMUSG00000030827	951	130.579	546.007	2.06401	3.97707e-35	1.94081e-32	Up	Fgf21	56636	fibroblast growth factor 21	Q9JJN1	K22429 FGF21; fibroblast growth factor 21	mmu04010:MAPK signaling pathway;mmu04014:Ras signaling pathway;mmu04015:Rap1 signaling pathway;mmu04151:PI3K-Akt signaling pathway;mmu04714:Thermogenesis;mmu04810:Regulation of actin cytoskeleton;mmu05200:Pathways in cancer;mmu05218:Melanoma;mmu05224:Breast cancer;mmu05226:Gastric cancer;	GO:0005104;GO:0008083;	GO:0008284;GO:0008543;GO:0010898;GO:0046326;GO:0070374;GO:0090080;GO:0120162;GO:1901215;GO:2000352;	GO:0005576;GO:0005615;
ENSMUSG00000030867	2199	401.471	264.164	-0.604034	8.82764e-05	0.00171806	Down	Plk1	18817	polo like kinase 1	Q3TPZ2	K06631 PLK1; polo-like kinase 1 [EC:2.7.11.21]	mmu04068:FoxO signaling pathway;mmu04110:Cell cycle;mmu04114:Oocyte meiosis;mmu04914:Progesterone-mediated oocyte maturation;	GO:0000166;GO:0000287;GO:0004672;GO:0004674;GO:0004674;GO:0004674;GO:0004674;GO:0005515;GO:0005524;GO:0008017;GO:0010997;GO:0016301;GO:0016740;GO:0019901;GO:0042802;GO:0000166;GO:0000287;GO:0004672;GO:0004674;GO:0004674;GO:0004674;GO:0004674;GO:0005515;GO:0005524;GO:0008017;GO:0010997;GO:0016301;GO:0016740;GO:0019901;GO:0042802;	GO:0000070;GO:0000086;GO:0000122;GO:0000132;GO:0000278;GO:0000278;GO:0000281;GO:0001578;GO:0006468;GO:0006468;GO:0007049;GO:0007094;GO:0007098;GO:0007346;GO:0010800;GO:0016310;GO:0016321;GO:0016567;GO:0018105;GO:0018105;GO:0018105;GO:0030071;GO:0031648;GO:0032436;GO:0032465;GO:0032465;GO:0033365;GO:0040038;GO:0043066;GO:0043393;GO:0043393;GO:0045143;GO:0045184;GO:0045736;GO:0045862;GO:0051081;GO:…	GO:0000775;GO:0000776;GO:0000776;GO:0000780;GO:0000785;GO:0000795;GO:0000922;GO:0000922;GO:0000942;GO:0005634;GO:0005634;GO:0005694;GO:0005737;GO:0005737;GO:0005813;GO:0005813;GO:0005814;GO:0005819;GO:0005856;GO:0005876;GO:0015630;GO:0030496;GO:0034451;GO:0051233;GO:0000775;GO:0000776;GO:0000776;GO:0000780;GO:0000785;GO:0000795;GO:0000922;GO:0000922;GO:0000942;GO:0005634;GO:0005634;GO:0005694;GO:…
ENSMUSG00000030996	2341	305.35	197.271	-0.632634	0.00201816	0.0235948	Down	Art1	11870	ADP-ribosyltransferase 1	Q60935	K06716 ART1; ADP-ribosyltransferase 1 [EC:2.4.2.31]	NA	GO:0003950;GO:0003950;GO:0003956;GO:0016740;GO:0016757;GO:0003950;GO:0003950;GO:0003956;GO:0016740;GO:0016757;	GO:0006471;GO:0006471;GO:0018120;GO:0006471;GO:0006471;GO:0018120;	GO:0009986;GO:0016020;GO:0016529;GO:0031225;GO:0009986;GO:0016020;GO:0016529;GO:0031225;
ENSMUSG00000031004	10061	2734.43	1756.24	-0.638432	5.845e-07	1.98489e-05	Down	Mki67	17345	antigen identified by monoclonal antibody Ki 67	E9PVX6	K17582 MKI67; antigen KI-67	NA	GO:0000166;GO:0003677;GO:0005524;GO:0008022;	GO:0007049;GO:0007088;GO:0008283;GO:0051321;GO:0051983;GO:0072574;GO:1902275;GO:1990705;	GO:0000775;GO:0000793;GO:0000793;GO:0005634;GO:0005634;GO:0005694;GO:0005730;GO:0005730;GO:0005737;GO:0016604;
ENSMUSG00000031022	1957	497.832	219.177	-1.18485	6.79004e-12	5.17142e-10	Down	BC051019	57355	cDNA sequence BC051019	Q9JJR6	NA	NA	GO:0003674;GO:0003674;	GO:0008150;GO:0008150;	GO:0005575;GO:0005575;
ENSMUSG00000031129	3468	1815.39	2765.76	0.607431	8.60507e-10	4.97282e-08	Up	Slc9a9	331004	solute carrier family 9 (sodium/hydrogen exchanger), member 9	Q8BZ00	K14725 SLC9A9; solute carrier family 9 (sodium/hydrogen exchanger), member 9	NA	GO:0015297;GO:0015299;GO:0015385;GO:0015386;	GO:0006811;GO:0006812;GO:0006814;GO:0006885;GO:0051453;GO:0055085;GO:0071805;GO:0098719;	GO:0005768;GO:0005886;GO:0016020;GO:0016021;GO:0055037;GO:0055037;
ENSMUSG00000031169	2622	3437.62	2125.34	-0.693724	8.88343e-07	2.89723e-05	Down	Porcn	53627	porcupine O-acyltransferase	Q9JJJ7	K00181 PORCN; O-palmitoleoyl transferase [EC:2.3.1.250]	mmu04310:Wnt signaling pathway;	GO:0005515;GO:0016740;GO:0016746;GO:0017147;GO:1990698;GO:1990698;	GO:0006497;GO:0009100;GO:0016055;GO:0016055;GO:0045234;GO:0045234;GO:0060070;GO:0099072;GO:0099072;	GO:0005783;GO:0016020;GO:0016021;GO:0030176;GO:0032281;GO:0098978;GO:0098978;
ENSMUSG00000031202	3401	89.0573	151.319	0.764076	0.00282358	0.0303702	Up	Rab39b	67790	RAB39B, member RAS oncogene family	Q8BHC1	K07925 RAB39B; Ras-related protein Rab-39B	mmu04140:Autophagy - animal;	GO:0000166;GO:0003924;GO:0005515;GO:0005525;GO:0031489;GO:0000166;GO:0003924;GO:0005515;GO:0005525;GO:0031489;	GO:0006886;GO:0006914;GO:0010506;GO:0015031;GO:0016192;GO:0032482;GO:0050808;GO:0006886;GO:0006914;GO:0010506;GO:0015031;GO:0016192;GO:0032482;GO:0050808;	GO:0005794;GO:0005794;GO:0005886;GO:0016020;GO:0031410;GO:0031982;GO:0043005;GO:0005794;GO:0005794;GO:0005886;GO:0016020;GO:0031410;GO:0031982;GO:0043005;
ENSMUSG00000031262	3309	268.232	164.462	-0.707695	0.000362834	0.00569132	Down	Cenpi	102920	centromere protein I	Q8K1K4	K11501 CENPI; centromere protein I	NA	GO:0003674;GO:0003674;	GO:0008150;GO:0034508;GO:0008150;GO:0034508;	GO:0000775;GO:0000776;GO:0005634;GO:0005694;GO:0005829;GO:0016604;GO:0000775;GO:0000776;GO:0005634;GO:0005694;GO:0005829;GO:0016604;
ENSMUSG00000031289	2281	207.918	104.418	-0.991618	9.27516e-06	0.000236382	Down	Il13ra2	16165	interleukin 13 receptor, alpha 2	O88786	K05077 IL13RA2; interleukin 13 receptor alpha-2	mmu04060:Cytokine-cytokine receptor interaction;mmu04630:JAK-STAT signaling pathway;	GO:0004896;GO:0005515;GO:0019955;	GO:0002638;GO:0016064;GO:0043305;	GO:0005576;GO:0009897;GO:0016020;GO:0016021;GO:0043235;
ENSMUSG00000031312	1314	776.975	437.435	-0.828626	2.71691e-10	1.7548e-08	Down	Itgb1bp2	26549	integrin beta 1 binding protein 2	Q9R000	K16735 ITGB1BP2; integrin beta-1-binding protein 2	NA	GO:0005178;GO:0005509;GO:0005515;GO:0008270;GO:0017124;GO:0046872;	NA	GO:0030018;
ENSMUSG00000031349	2168	5774.39	9078.49	0.652801	3.83668e-18	5.21156e-16	Up	Nsdhl	18194	NAD(P) dependent steroid dehydrogenase-like	Q9R1J0	K07748 NSDHL; sterol-4alpha-carboxylate 3-dehydrogenase (decarboxylating) [EC:1.1.1.170]	mmu00100:Steroid biosynthesis;mmu01100:Metabolic pathways;	GO:0003854;GO:0016491;GO:0016616;GO:0047012;GO:0003854;GO:0016491;GO:0016616;GO:0047012;	GO:0001942;GO:0006629;GO:0006694;GO:0006695;GO:0007224;GO:0008202;GO:0008203;GO:0008203;GO:0016126;GO:0060716;GO:0001942;GO:0006629;GO:0006694;GO:0006695;GO:0007224;GO:0008202;GO:0008203;GO:0008203;GO:0016126;GO:0060716;	GO:0005783;GO:0005783;GO:0005811;GO:0016020;GO:0016021;GO:0005783;GO:0005783;GO:0005811;GO:0016020;GO:0016021;
ENSMUSG00000031391	5126	426.701	740.064	0.794767	4.19556e-10	2.59534e-08	Up	L1cam	16728	L1 cell adhesion molecule	A2AFG7	K06550 L1CAM; L1 cell adhesion molecule	mmu04360:Axon guidance;mmu04514:Cell adhesion molecules (CAMs);	GO:0005178;GO:0005515;GO:0008046;GO:0019904;GO:0030165;GO:0033691;GO:0042802;GO:0043621;GO:0005178;GO:0005515;GO:0008046;GO:0019904;GO:0030165;GO:0033691;GO:0042802;GO:0043621;GO:0005178;GO:0005515;GO:0008046;GO:0019904;GO:0030165;GO:0033691;GO:0042802;GO:0043621;	GO:0007155;GO:0007156;GO:0007156;GO:0007157;GO:0007159;GO:0007160;GO:0007166;GO:0007275;GO:0007399;GO:0007411;GO:0007411;GO:0007411;GO:0007411;GO:0007413;GO:0010811;GO:0016477;GO:0022409;GO:0030154;GO:0031175;GO:0031175;GO:0031175;GO:0033631;GO:0034109;GO:0045773;GO:0050804;GO:0050808;GO:0050808;GO:0050850;GO:0061564;GO:0070372;GO:0007155;GO:0007156;GO:0007156;GO:0007157;GO:0007159;GO:0007160;GO:…	GO:0005768;GO:0005886;GO:0005886;GO:0009897;GO:0009986;GO:0009986;GO:0016020;GO:0016021;GO:0030424;GO:0030424;GO:0030425;GO:0042734;GO:0042995;GO:0043025;GO:0043025;GO:0043195;GO:0044294;GO:0044295;GO:0045121;GO:0098685;GO:0005768;GO:0005886;GO:0005886;GO:0009897;GO:0009986;GO:0009986;GO:0016020;GO:0016021;GO:0030424;GO:0030424;GO:0030425;GO:0042734;GO:0042995;GO:0043025;GO:0043025;GO:0043195;GO:…
ENSMUSG00000031431	2876	1789.39	3235.83	0.854408	1.44845e-18	2.07443e-16	Up	Tsc22d3	14605	TSC22 domain family, member 3	Q9Z2S7	NA	NA	GO:0003700;GO:0005515;GO:0043426;	GO:0000122;GO:0006355;GO:0006970;GO:0048642;GO:0070236;	GO:0005634;GO:0005737;
ENSMUSG00000031534	1435	549.631	830.575	0.595904	0.000986936	0.0130039	Up	Smim19	102032	small integral membrane protein 19	Q80ZU4	NA	NA	GO:0003674;GO:0003674;	GO:0008150;GO:0008150;	GO:0016020;GO:0016021;GO:0016020;GO:0016021;
ENSMUSG00000031538	4042	5231.94	3088.71	-0.760477	3.58489e-26	9.4469e-24	Down	Plat	18791	plasminogen activator, tissue	P11214	K01343 PLAT; tissue plasminogen activator [EC:3.4.21.68]	mmu04371:Apelin signaling pathway;mmu04610:Complement and coagulation cascades;mmu05202:Transcriptional misregulation in cancer;mmu05215:Prostate cancer;mmu05418:Fluid shear stress and atherosclerosis;	GO:0004252;GO:0004252;GO:0004252;GO:0005102;GO:0008233;GO:0008236;GO:0016787;GO:0051219;	GO:0001666;GO:0006508;GO:0006508;GO:0014909;GO:0014909;GO:0031639;GO:0031639;GO:0035249;GO:0045861;GO:0048008;GO:0048008;GO:0048008;GO:0060279;GO:0099183;	GO:0005576;GO:0005615;GO:0005615;GO:0005615;GO:0005737;GO:0005737;GO:0009986;GO:0030141;GO:0045177;GO:0045202;GO:0098685;GO:0098794;GO:0098978;GO:0098978;GO:0098992;GO:0099544;
ENSMUSG00000031604	2969	5813.84	9657.67	0.732167	2.92784e-14	2.75551e-12	Up	Msmo1	66234	methylsterol monoxygenase 1	Q9CRA4	K07750 MESO1; methylsterol monooxygenase [EC:1.14.18.9]	mmu00100:Steroid biosynthesis;mmu01100:Metabolic pathways;	GO:0000254;GO:0005506;GO:0016491;	GO:0006629;GO:0006694;GO:0008202;GO:0008610;GO:0016126;GO:0055114;	GO:0005783;GO:0005789;GO:0016020;GO:0016021;
ENSMUSG00000031621	1793	327.004	200.875	-0.703724	0.0011882	0.0151409	Down	Isx	71597	intestine specific homeobox	B1Q2M1	NA	NA	GO:0000977;GO:0000981;GO:0001227;GO:0003677;GO:0043565;GO:0000977;GO:0000981;GO:0001227;GO:0003677;GO:0043565;	GO:0006355;GO:0006357;GO:1901738;GO:1904479;GO:0006355;GO:0006357;GO:1901738;GO:1904479;	GO:0005634;GO:0005634;GO:0005634;GO:0005634;
ENSMUSG00000031723	1890	329.773	210.246	-0.648044	0.00097041	0.0128117	Down	Txnl4b	234723	thioredoxin-like 4B	Q8BUH1	NA	NA	GO:0003674;	GO:0000398;GO:0006397;GO:0007049;GO:0008284;GO:0008380;	GO:0005634;GO:0005654;GO:0005682;GO:0005829;GO:0046540;
ENSMUSG00000031762	511	154.765	1158.71	2.90391	9.01515e-63	1.97973e-59	Up	Mt2	17750	metallothionein 2	P02798	K14739 MT1_2; metallothionein 1/2	mmu04978:Mineral absorption;	GO:0008270;GO:0046872;	GO:0006882;GO:0006882;GO:0007263;GO:0009617;GO:0010273;GO:0010273;GO:0071276;GO:0071280;GO:0071294;	GO:0005634;GO:0005737;
ENSMUSG00000031765	1085	907.628	2284.98	1.33161	4.43125e-48	3.89241e-45	Up	Mt1	17748	metallothionein 1	A0A1D5RLN7	K14739 MT1_2; metallothionein 1/2	mmu04978:Mineral absorption;	GO:0005507;GO:0008270;GO:0046872;GO:0046872;GO:0005507;GO:0008270;GO:0046872;GO:0046872;	GO:0006875;GO:0006882;GO:0006882;GO:0007263;GO:0010273;GO:0010273;GO:0043524;GO:0071247;GO:0071276;GO:0071280;GO:0071294;GO:0071294;GO:0006875;GO:0006882;GO:0006882;GO:0007263;GO:0010273;GO:0010273;GO:0043524;GO:0071247;GO:0071276;GO:0071280;GO:0071294;GO:0071294;	GO:0005634;GO:0005737;GO:0005764;GO:0005829;GO:0005634;GO:0005737;GO:0005764;GO:0005829;
ENSMUSG00000031808	3207	3574.42	2030.25	-0.816512	1.62407e-17	2.09791e-15	Down	Slc27a1	26457	solute carrier family 27 (fatty acid transporter), member 1	Q60714	K08745 SLC27A1_4; solute carrier family 27 (fatty acid transporter), member 1/4 [EC:6.2.1.-]	mmu03320:PPAR signaling pathway;mmu04931:Insulin resistance;	GO:0000166;GO:0003824;GO:0004467;GO:0004467;GO:0004467;GO:0005324;GO:0005515;GO:0015245;GO:0015245;GO:0015245;GO:0016874;GO:0031957;GO:0031957;GO:0042803;GO:0000166;GO:0003824;GO:0004467;GO:0004467;GO:0004467;GO:0005324;GO:0005515;GO:0015245;GO:0015245;GO:0015245;GO:0016874;GO:0031957;GO:0031957;GO:0042803;	GO:0001579;GO:0001579;GO:0001676;GO:0006629;GO:0006631;GO:0006646;GO:0006646;GO:0006654;GO:0006654;GO:0006655;GO:0006655;GO:0006656;GO:0006656;GO:0006659;GO:0006659;GO:0006661;GO:0006661;GO:0006869;GO:0009409;GO:0009409;GO:0010867;GO:0015908;GO:0015908;GO:0015909;GO:0031652;GO:0031652;GO:0032049;GO:0032049;GO:0032868;GO:0032868;GO:0033211;GO:0033211;GO:0044539;GO:0044539;GO:0044539;GO:0071072;GO:…	GO:0005737;GO:0005739;GO:0005739;GO:0005743;GO:0005743;GO:0005783;GO:0005829;GO:0005886;GO:0005886;GO:0005886;GO:0005886;GO:0005887;GO:0005901;GO:0016020;GO:0016021;GO:0031410;GO:0043231;GO:0005737;GO:0005739;GO:0005739;GO:0005743;GO:0005743;GO:0005783;GO:0005829;GO:0005886;GO:0005886;GO:0005886;GO:0005886;GO:0005887;GO:0005901;GO:0016020;GO:0016021;GO:0031410;GO:0043231;
ENSMUSG00000031818	765	2906.79	4848.02	0.737911	4.95163e-06	0.000134244	Up	Cox4i1	12857	cytochrome c oxidase subunit 4I1	P19783	K02263 COX4; cytochrome c oxidase subunit 4	mmu00190:Oxidative phosphorylation;mmu01100:Metabolic pathways;mmu04260:Cardiac muscle contraction;mmu04714:Thermogenesis;mmu04932:Non-alcoholic fatty liver disease (NAFLD);mmu05010:Alzheimer disease;mmu05012:Parkinson disease;mmu05016:Huntington disease;	GO:0004129;GO:0005515;GO:0004129;GO:0005515;	GO:0006123;GO:0006123;	GO:0005634;GO:0005739;GO:0005739;GO:0005739;GO:0005743;GO:0005743;GO:0005751;GO:0005751;GO:0016020;GO:0031966;GO:0005634;GO:0005739;GO:0005739;GO:0005739;GO:0005743;GO:0005743;GO:0005751;GO:0005751;GO:0016020;GO:0031966;
ENSMUSG00000031842	3452	37.9966	13.4576	-1.50374	0.00422662	0.0422214	Down	Pde4c	110385	phosphodiesterase 4C, cAMP specific	Q3UEI1	K13293 PDE4; cAMP-specific phosphodiesterase 4 [EC:3.1.4.53]	mmu00230:Purine metabolism;mmu01100:Metabolic pathways;mmu04024:cAMP signaling pathway;mmu04928:Parathyroid hormone synthesis, secretion and action;mmu05032:Morphine addiction;	GO:0004114;GO:0004115;GO:0005515;GO:0008081;GO:0016787;GO:0046872;	GO:0007165;GO:0061179;	GO:0005929;GO:0042995;
ENSMUSG00000031957	878	469.914	167.438	-1.4881	1.90583e-18	2.70014e-16	Down	Ctrb1	66473	chymotrypsinogen B1	Q9CR35	K01310 CTRB; chymotrypsin [EC:3.4.21.1]	mmu04972:Pancreatic secretion;mmu04974:Protein digestion and absorption;	GO:0004252;GO:0008233;GO:0008236;GO:0016787;	GO:0006508;GO:0007586;GO:0030163;GO:0034097;GO:0043065;	GO:0005576;GO:0005737;GO:0005764;
ENSMUSG00000032009	9125	4879.33	7390.93	0.599152	2.82439e-10	1.81533e-08	Up	Sesn3	75747	sestrin 3	Q9CYP7	K10141 SESN1_3; sestrin 1/3	mmu04115:p53 signaling pathway;mmu04211:Longevity regulating pathway;	GO:0005515;GO:0016491;GO:0016684;GO:0070728;GO:0005515;GO:0016491;GO:0016684;GO:0070728;	GO:0016239;GO:0032868;GO:0032868;GO:0034198;GO:0038203;GO:0042149;GO:0042593;GO:0042593;GO:0046626;GO:0051896;GO:0055114;GO:0071230;GO:0071230;GO:0071233;GO:1901031;GO:1904262;GO:1904262;GO:1904262;GO:1990253;GO:0016239;GO:0032868;GO:0032868;GO:0034198;GO:0038203;GO:0042149;GO:0042593;GO:0042593;GO:0046626;GO:0051896;GO:0055114;GO:0071230;GO:0071230;GO:0071233;GO:1901031;GO:1904262;GO:1904262;GO:…	GO:0005634;GO:0005737;GO:0005737;GO:0031932;GO:0031932;GO:0061700;GO:0061700;GO:0005634;GO:0005737;GO:0005737;GO:0031932;GO:0031932;GO:0061700;GO:0061700;
ENSMUSG00000032053	2548	47.4006	4.2912	-3.481	1.13111e-07	4.44882e-06	Down	Pou2af1	18985	POU domain, class 2, associating factor 1	Q64693	NA	NA	GO:0000978;GO:0000979;GO:0003677;GO:0003713;GO:0005515;GO:0000978;GO:0000979;GO:0003677;GO:0003713;GO:0005515;	GO:0045944;GO:0045944;	GO:0005634;GO:0090575;GO:0005634;GO:0090575;
ENSMUSG00000032076	4767	539.949	961.926	0.832969	4.2586e-05	0.00090795	Up	Cadm1	54725	cell adhesion molecule 1	E9PYN1	K06781 CADM1; cell adhesion molecule 1	mmu04514:Cell adhesion molecules (CAMs);	GO:0005102;GO:0005102;GO:0005515;GO:0030165;GO:0042803;GO:0050839;GO:0005102;GO:0005102;GO:0005515;GO:0030165;GO:0042803;GO:0050839;	GO:0001889;GO:0002376;GO:0006915;GO:0007155;GO:0007156;GO:0007157;GO:0007275;GO:0007283;GO:0007416;GO:0007416;GO:0008037;GO:0008037;GO:0009826;GO:0016338;GO:0030154;GO:0042271;GO:0042271;GO:0042271;GO:0045954;GO:0045954;GO:0050715;GO:0051606;GO:0051606;GO:0060348;GO:0098880;GO:0098880;GO:0098942;GO:0098942;GO:0098942;GO:0099054;GO:0099054;GO:0099560;GO:0001889;GO:0002376;GO:0006915;GO:0007155;GO:…	GO:0005886;GO:0005886;GO:0005911;GO:0008021;GO:0014069;GO:0016020;GO:0016021;GO:0016323;GO:0030054;GO:0030424;GO:0030425;GO:0043005;GO:0043196;GO:0045202;GO:0070852;GO:0098685;GO:0098685;GO:0098978;GO:0098978;GO:0099055;GO:0099056;GO:0005886;GO:0005886;GO:0005911;GO:0008021;GO:0014069;GO:0016020;GO:0016021;GO:0016323;GO:0030054;GO:0030424;GO:0030425;GO:0043005;GO:0043196;GO:0045202;GO:0070852;GO:…
ENSMUSG00000032085	1595	5994.39	2884.53	-1.05511	1.2216e-34	5.7485e-32	Down	Tagln	21345	transgelin	P37804	K20526 TAGLN; transgelin	NA	GO:0051015;	GO:0030855;	GO:0005737;
ENSMUSG00000032281	2880	276.364	425.278	0.622085	2.16361e-05	0.000504561	Up	Acsbg1	94180	acyl-CoA synthetase bubblegum family member 1	Q99PU5	K15013 ACSBG; long-chain-fatty-acid--CoA ligase ACSBG [EC:6.2.1.3]	mmu00061:Fatty acid biosynthesis;mmu00071:Fatty acid degradation;mmu01100:Metabolic pathways;mmu01212:Fatty acid metabolism;mmu03320:PPAR signaling pathway;mmu04920:Adipocytokine signaling pathway;	GO:0000166;GO:0003824;GO:0004467;GO:0004467;GO:0005524;GO:0016874;GO:0031957;GO:0031957;GO:0102391;	GO:0000038;GO:0000038;GO:0001676;GO:0001676;GO:0006629;GO:0006631;GO:0042759;GO:0051384;	GO:0005737;GO:0031410;GO:0043231;
ENSMUSG00000032288	924	370.779	565.028	0.606508	0.000166126	0.002946	Up	Imp3	102462	IMP3, U3 small nucleolar ribonucleoprotein	Q921Y2	K14560 IMP3; U3 small nucleolar ribonucleoprotein protein IMP3	mmu03008:Ribosome biogenesis in eukaryotes;	GO:0003723;GO:0019843;GO:0030515;	GO:0006364;GO:0006364;GO:0042254;	GO:0005634;GO:0005730;GO:0030684;GO:0032040;GO:0034457;GO:0034457;
ENSMUSG00000032322	2822	350.427	171.037	-1.0326	1.75965e-05	0.000418505	Down	Pstpip1	19200	proline-serine-threonine phosphatase-interacting protein 1	P97814	K12804 PSTPIP1; proline-serine-threonine phosphatase interacting protein 1	mmu04621:NOD-like receptor signaling pathway;	GO:0003779;GO:0005515;GO:0008092;GO:0019903;GO:0042802;GO:0051015;GO:0003779;GO:0005515;GO:0008092;GO:0019903;GO:0042802;GO:0051015;	GO:0002376;GO:0006897;GO:0006954;GO:0007155;GO:0030041;GO:0045087;GO:0002376;GO:0006897;GO:0006954;GO:0007155;GO:0030041;GO:0045087;	GO:0001725;GO:0005737;GO:0005826;GO:0005856;GO:0005884;GO:0005886;GO:0016020;GO:0032154;GO:0042995;GO:0001725;GO:0005737;GO:0005826;GO:0005856;GO:0005884;GO:0005886;GO:0016020;GO:0032154;GO:0042995;
ENSMUSG00000032348	977	794.875	1346.88	0.761023	1.8054e-12	1.47751e-10	Up	Gsta4	14860	glutathione S-transferase, alpha 4	P24472	K00799 GST; glutathione S-transferase [EC:2.5.1.18]	mmu00480:Glutathione metabolism;mmu00980:Metabolism of xenobiotics by cytochrome P450;mmu00982:Drug metabolism - cytochrome P450;mmu00983:Drug metabolism - other enzymes;mmu01100:Metabolic pathways;mmu01524:Platinum drug resistance;mmu05200:Pathways in cancer;mmu05204:Chemical carcinogenesis;mmu05225:Hepatocellular carcinoma;mmu05418:Fluid shear stress and atherosclerosis;	GO:0004364;GO:0004364;GO:0004364;GO:0008144;GO:0016740;GO:0043295;	GO:0006749;GO:0006805;	GO:0005737;GO:0005739;
ENSMUSG00000032531	4427	8252.25	5139.42	-0.683021	1.41945e-18	2.05524e-16	Down	Amotl2	56332	angiomotin-like 2	Q8K371	K06104 AMOTL; angiomotin like	mmu04530:Tight junction;	GO:0005515;GO:0042802;	GO:0001525;GO:0003365;GO:0016055;GO:0030036;GO:0030334;GO:0035329;GO:0035329;	GO:0005768;GO:0005923;GO:0005923;GO:0016324;GO:0031410;GO:0031410;
ENSMUSG00000032715	2026	87.5819	697.336	2.99274	9.00036e-66	2.37178e-62	Up	Trib3	228775	tribbles pseudokinase 3	Q8K4K2	K19518 TRIB3; tribbles homolog 3	mmu04931:Insulin resistance;	GO:0003714;GO:0004672;GO:0004860;GO:0005515;GO:0005524;GO:0019899;GO:0019901;GO:0019901;GO:0031434;GO:0031625;GO:0031625;GO:0055106;	GO:0000122;GO:0006468;GO:0006469;GO:0006469;GO:0006915;GO:0010506;GO:0010827;GO:0032092;GO:0032436;GO:0032436;GO:0032869;GO:0034976;GO:0043405;GO:0043405;GO:0045599;GO:0045717;GO:0045732;GO:0045892;GO:0051443;GO:0070059;	GO:0005634;GO:0005634;GO:0005634;GO:0005730;GO:0031965;
ENSMUSG00000032735	4532	1259.26	616.936	-1.02833	5.04158e-18	6.77836e-16	Down	Ablim3	319713	actin binding LIM protein family, member 3	Q69ZX8	K07520 ABLIM; actin-binding LIM protein	mmu04360:Axon guidance;	GO:0003779;GO:0046872;GO:0051015;	GO:0006351;GO:0007010;GO:0030032;GO:0030032;GO:0030036;GO:0045944;GO:0060271;GO:0060271;	GO:0001725;GO:0001725;GO:0005737;GO:0015629;GO:0030027;GO:0045202;GO:0098978;
ENSMUSG00000032815	4485	88.7158	39.761	-1.16183	0.00206768	0.0240214	Down	Fanca	14087	Fanconi anemia, complementation group A	Q9JL70	K10888 FANCA; fanconi anemia group A protein	mmu03460:Fanconi anemia pathway;	NA	GO:0006281;GO:0006974;GO:0007140;GO:0008584;GO:0008585;GO:0036297;GO:0042127;GO:0045589;GO:0050727;GO:0051090;GO:2000348;	GO:0005634;GO:0005737;GO:0043240;
ENSMUSG00000032925	4065	405.14	263.625	-0.619665	3.45434e-05	0.00075355	Down	Itgbl1	223272	integrin, beta-like 1	Q8VDV0	NA	NA	GO:0005178;	GO:0007160;GO:0007229;GO:0016477;GO:0033627;	GO:0005576;GO:0005615;GO:0005925;GO:0008305;GO:0009986;
ENSMUSG00000033032	3444	483.503	313.994	-0.621167	0.000703794	0.00985461	Down	Afap1l1	106877	actin filament associated protein 1-like 1	Q8BZI0	NA	NA	GO:0005515;GO:0017124;GO:0005515;GO:0017124;	GO:0008150;GO:0008150;	GO:0005737;GO:0005829;GO:0005856;GO:0030054;GO:0042995;GO:0005737;GO:0005829;GO:0005856;GO:0030054;GO:0042995;
ENSMUSG00000033044	1108	80.5965	32.3686	-1.3127	0.000588156	0.00852535	Down	Dhrs7c	68460	dehydrogenase/reductase (SDR family) member 7C	Q8CHS7	K11167 DHRS7C; dehydrogenase/reductase SDR family member 7C [EC:1.1.-.-]	NA	GO:0004745;GO:0004745;GO:0016491;	GO:0010880;GO:0010880;GO:0055114;	GO:0005576;GO:0014801;GO:0033017;GO:0033017;
ENSMUSG00000033105	6992	2948.65	4834.1	0.713039	7.70007e-07	2.55557e-05	Up	Lss	16987	lanosterol synthase	Q8BLN5	K01852 LSS; lanosterol synthase [EC:5.4.99.7]	mmu00100:Steroid biosynthesis;mmu01100:Metabolic pathways;	GO:0000250;GO:0000250;GO:0016853;GO:0016866;	GO:0006629;GO:0006694;GO:0006695;GO:0006695;GO:0016125;GO:0031647;	GO:0005783;GO:0005811;GO:0005811;GO:0016020;GO:0043231;
ENSMUSG00000033196	6083	339.839	191.112	-0.830248	1.17793e-06	3.70417e-05	Down	Myh2	17882	myosin, heavy polypeptide 2, skeletal muscle, adult	G3UW82	K10352 MYH; myosin heavy chain	mmu04530:Tight junction;	NA	GO:0001778;GO:0006936;GO:0014823;GO:0070252;	GO:0005794;GO:0005826;GO:0005859;GO:0005911;GO:0030016;GO:0030016;GO:0031672;GO:0032991;
ENSMUSG00000033207	3414	1855.78	2805.44	0.59604	1.13437e-08	5.28143e-07	Up	Mamdc2	71738	MAM domain containing 2	Q8CG85	NA	NA	GO:0005539;GO:0005539;	GO:0019800;GO:0019800;	GO:0005576;GO:0005614;GO:0005783;GO:0016020;GO:0031012;GO:0005576;GO:0005614;GO:0005783;GO:0016020;GO:0031012;
ENSMUSG00000033420	5253	7126.49	4448.95	-0.679791	2.03872e-23	4.71265e-21	Down	Antxr1	69538	anthrax toxin receptor 1	Q9CZ52	K20909 ANTXR; anthrax toxin receptor	mmu04621:NOD-like receptor signaling pathway;	GO:0004888;GO:0004888;GO:0005518;GO:0038023;GO:0046872;GO:0051015;	GO:0001568;GO:0022414;GO:0031532;GO:0034446;GO:1901202;GO:1901998;GO:1905050;	GO:0005886;GO:0005886;GO:0009897;GO:0009986;GO:0009986;GO:0016020;GO:0016021;GO:0031258;GO:0031527;GO:0042995;
ENSMUSG00000033453	5928	219.243	97.1898	-1.1719	1.8447e-05	0.000435587	Down	Adamts15	235130	a disintegrin-like and metallopeptidase (reprolysin type) with thrombospondin type 1 motif, 15	P59384	K08629 ADAMTS15; a disintegrin and metalloproteinase with thrombospondin motifs 15 [EC:3.4.24.-]	NA	GO:0004175;GO:0004222;GO:0008201;GO:0008233;GO:0008237;GO:0008270;GO:0016787;GO:0046872;GO:0050840;	GO:0006508;	GO:0005576;GO:0005615;GO:0009986;GO:0062023;
ENSMUSG00000033685	3988	1673.83	5569.35	1.73448	3.3805e-66	1.11354e-62	Up	Ucp2	22228	uncoupling protein 2 (mitochondrial, proton carrier)	Q549J5	K15103 UCP2_3; solute carrier family 25 (mitochondrial uncoupling protein), member 8/9	NA	GO:0017077;GO:0022857;GO:0017077;GO:0022857;	GO:0000303;GO:0001666;GO:0006839;GO:0009409;GO:0010942;GO:0043066;GO:0051881;GO:0061179;GO:0120162;GO:1990542;GO:1990845;GO:0000303;GO:0001666;GO:0006839;GO:0009409;GO:0010942;GO:0043066;GO:0051881;GO:0061179;GO:0120162;GO:1990542;GO:1990845;	GO:0005737;GO:0005739;GO:0005739;GO:0005739;GO:0005743;GO:0016020;GO:0016021;GO:0031966;GO:0005737;GO:0005739;GO:0005739;GO:0005739;GO:0005743;GO:0016020;GO:0016021;GO:0031966;
ENSMUSG00000033715	3183	155.356	374.396	1.26964	2.89334e-11	2.07188e-09	Up	Akr1c14	105387	aldo-keto reductase family 1, member C14	Q91WT7	NA	NA	GO:0004032;GO:0008106;GO:0016229;GO:0016229;GO:0016491;GO:0047023;GO:0047023;GO:0047086;	GO:0006693;GO:0008202;GO:0042448;GO:0044597;GO:0044598;	GO:0005829;
ENSMUSG00000034127	1381	3298.92	1871.74	-0.817915	4.73706e-16	5.33466e-14	Down	Tspan8	216350	tetraspanin 8	Q8R3G9	K17349 TSPAN8; tetraspanin-8	NA	GO:0003674;GO:0005178;	GO:0007283;GO:0010468;GO:0030195;	GO:0005887;GO:0009986;GO:0016020;GO:0016021;
ENSMUSG00000034205	5316	677.986	1043.79	0.622769	1.30954e-08	5.97039e-07	Up	Loxl2	94352	lysyl oxidase-like 2	P58022	K00280 LOXL2_3_4; lysyl oxidase-like protein 2/3/4 [EC:1.4.3.-]	NA	GO:0004720;GO:0004720;GO:0005044;GO:0005507;GO:0005509;GO:0016491;GO:0016641;GO:0046872;GO:0070492;	GO:0000122;GO:0001666;GO:0001837;GO:0001935;GO:0002040;GO:0006325;GO:0006464;GO:0010718;GO:0018057;GO:0018057;GO:0030199;GO:0030199;GO:0032332;GO:0043542;GO:0045892;GO:0046688;GO:0055114;GO:0070828;GO:1902455;	GO:0000785;GO:0005576;GO:0005604;GO:0005615;GO:0005615;GO:0005615;GO:0005634;GO:0005654;GO:0005694;GO:0005783;GO:0016020;GO:0062023;
ENSMUSG00000034206	8628	178.309	70.77	-1.33339	8.22523e-07	2.70939e-05	Down	Polq	77782	polymerase (DNA directed), theta	Q80XB7	K02349 POLQ; DNA polymerase theta [EC:2.7.7.7]	NA	GO:0000166;GO:0003676;GO:0003677;GO:0003682;GO:0003887;GO:0003887;GO:0005524;GO:0016740;GO:0016779;GO:0042802;GO:0043142;GO:0051575;GO:0000166;GO:0003676;GO:0003677;GO:0003682;GO:0003887;GO:0003887;GO:0005524;GO:0016740;GO:0016779;GO:0042802;GO:0043142;GO:0051575;	GO:0006260;GO:0006261;GO:0006281;GO:0006281;GO:0006284;GO:0006302;GO:0006974;GO:0016446;GO:0051260;GO:0097681;GO:0097681;GO:2000042;GO:2000042;GO:0006260;GO:0006261;GO:0006281;GO:0006281;GO:0006284;GO:0006302;GO:0006974;GO:0016446;GO:0051260;GO:0097681;GO:0097681;GO:2000042;GO:2000042;	GO:0005634;GO:0005694;GO:0005737;GO:0005634;GO:0005694;GO:0005737;
ENSMUSG00000034311	4983	405.819	217.509	-0.898944	6.78025e-07	2.27899e-05	Down	Kif4	16571	kinesin family member 4	P33174	K10395 KIF4_21_27; kinesin family member 4/21/27	NA	GO:0000166;GO:0003677;GO:0003777;GO:0005524;GO:0008017;GO:0016887;	GO:0000281;GO:0007018;GO:0007052;GO:0051256;	GO:0005634;GO:0005654;GO:0005694;GO:0005737;GO:0005856;GO:0005871;GO:0005874;GO:0030496;GO:0045171;
ENSMUSG00000034394	4026	675.61	400.504	-0.753209	1.42597e-08	6.45658e-07	Down	Lif	16878	leukemia inhibitory factor	P09056	K05419 LIF; leukemia inhibitory factor	mmu04060:Cytokine-cytokine receptor interaction;mmu04550:Signaling pathways regulating pluripotency of stem cells;mmu04630:JAK-STAT signaling pathway;mmu04668:TNF signaling pathway;	GO:0005102;GO:0005125;GO:0005125;GO:0005125;GO:0005146;GO:0005146;GO:0008083;GO:0008083;GO:0008083;GO:0005102;GO:0005125;GO:0005125;GO:0005125;GO:0005146;GO:0005146;GO:0008083;GO:0008083;GO:0008083;	GO:0001974;GO:0006955;GO:0007260;GO:0007566;GO:0007566;GO:0008284;GO:0008284;GO:0008284;GO:0008285;GO:0010628;GO:0010976;GO:0016525;GO:0019827;GO:0019827;GO:0030324;GO:0031100;GO:0033138;GO:0033141;GO:0042531;GO:0043410;GO:0045595;GO:0045595;GO:0045651;GO:0045835;GO:0045944;GO:0045944;GO:0045944;GO:0046697;GO:0046697;GO:0046888;GO:0048286;GO:0048644;GO:0048666;GO:0048708;GO:0048711;GO:0048861;GO:…	GO:0005576;GO:0005615;GO:0005615;GO:0005615;GO:0005829;GO:0005576;GO:0005615;GO:0005615;GO:0005615;GO:0005829;
ENSMUSG00000034429	2701	170.321	273.128	0.680238	0.00422037	0.0421908	Up	Zfp707	69020	zinc finger protein 707	D3Z445	K09228 KRAB; KRAB domain-containing zinc finger protein	mmu05168:Herpes simplex virus 1 infection;	NA	NA	GO:0005575;GO:0005575;
ENSMUSG00000034438	3382	3.75546	23.7339	2.65968	0.00366674	0.0377445	Up	Gbp8	76074	guanylate-binding protein 8	Q2V6D6	K20908 GBP6; guanylate-binding protein 6	NA	GO:0003924;GO:0005525;	GO:0042832;GO:0050830;GO:0071346;GO:0071346;	GO:0020005;GO:0031410;
ENSMUSG00000034485	4493	1289.29	838.851	-0.619453	0.00128005	0.0161397	Down	Uaca	72565	uveal autoantigen with coiled-coil domains and ankyrin repeats	A0A1L1SVG0	NA	NA	GO:0005515;GO:0005515;GO:0005515;	GO:0008630;GO:0008631;GO:0009411;GO:0042307;GO:0043065;GO:0043065;GO:0043280;GO:0043280;GO:0050728;GO:0097190;GO:1901222;GO:1901223;GO:0008630;GO:0008631;GO:0009411;GO:0042307;GO:0043065;GO:0043065;GO:0043280;GO:0043280;GO:0050728;GO:0097190;GO:1901222;GO:1901223;GO:0008630;GO:0008631;GO:0009411;GO:0042307;GO:0043065;GO:0043065;GO:0043280;GO:0043280;GO:0050728;GO:0097190;GO:1901222;GO:1901223;	GO:0005634;GO:0005634;GO:0005635;GO:0005737;GO:0005829;GO:0005829;GO:0005856;GO:0016020;GO:0043293;GO:0048471;GO:0005634;GO:0005634;GO:0005635;GO:0005737;GO:0005829;GO:0005829;GO:0005856;GO:0016020;GO:0043293;GO:0048471;GO:0005634;GO:0005634;GO:0005635;GO:0005737;GO:0005829;GO:0005829;GO:0005856;GO:0016020;GO:0043293;GO:0048471;
ENSMUSG00000034586	3276	1591.64	2497.06	0.649696	1.28076e-13	1.13257e-11	Up	Hid1	217310	HID1 domain containing	Q8R1F6	NA	NA	GO:0003674;GO:0003674;	GO:0006886;GO:0006886;	GO:0000138;GO:0000138;GO:0005737;GO:0005794;GO:0005797;GO:0005797;GO:0005829;GO:0005881;GO:0016020;GO:0090498;GO:0000138;GO:0000138;GO:0005737;GO:0005794;GO:0005797;GO:0005797;GO:0005829;GO:0005881;GO:0016020;GO:0090498;
ENSMUSG00000034903	5045	807.017	1442.51	0.838448	6.89319e-16	7.69701e-14	Up	Cobll1	319876	Cobl-like 1	B1AZ15	NA	NA	GO:0003785;GO:0003785;	NA	NA
ENSMUSG00000034906	2695	420.983	274.446	-0.615854	0.000248311	0.00413693	Down	Ncaph	215387	non-SMC condensin I complex, subunit H	Q8C156	K06676 BRRN1; condensin complex subunit 2	NA	GO:0003682;GO:0044547;GO:0072587;	GO:0007049;GO:0007076;GO:0007076;GO:0007143;GO:0010032;GO:0010032;GO:0030261;GO:0045132;GO:0051301;GO:0051309;	GO:0000796;GO:0000796;GO:0000796;GO:0000799;GO:0005634;GO:0005634;GO:0005694;GO:0005737;GO:0005829;
ENSMUSG00000034926	4028	5708.26	11335.3	0.98967	6.06254e-41	4.30715e-38	Up	Dhcr24	74754	24-dehydrocholesterol reductase	Q8VCH6	K09828 DHCR24; Delta24-sterol reductase [EC:1.3.1.72 1.3.1.-]	mmu00100:Steroid biosynthesis;mmu01100:Metabolic pathways;	GO:0000246;GO:0000246;GO:0016491;GO:0016628;GO:0016628;GO:0019899;GO:0042605;GO:0050614;GO:0050660;GO:0071949;	GO:0006629;GO:0006694;GO:0006695;GO:0006695;GO:0007265;GO:0008104;GO:0008202;GO:0008202;GO:0008203;GO:0008285;GO:0009888;GO:0009888;GO:0016125;GO:0016126;GO:0030539;GO:0031639;GO:0042987;GO:0043066;GO:0043154;GO:0043588;GO:0055114;GO:0061024;	GO:0005634;GO:0005737;GO:0005737;GO:0005783;GO:0005794;GO:0005829;GO:0005856;GO:0016020;GO:0016020;GO:0016021;
ENSMUSG00000035277	2881	125.406	60.7674	-1.04547	0.0026042	0.0285228	Down	Arx	11878	aristaless related homeobox	O35085	K09452 ARX; homeobox protein aristaless-related	NA	GO:0000977;GO:0000980;GO:0000981;GO:0000981;GO:0001227;GO:0003677;GO:0003682;GO:0043565;	GO:0000122;GO:0001764;GO:0006355;GO:0007275;GO:0007399;GO:0007411;GO:0010628;GO:0021759;GO:0021772;GO:0021800;GO:0021831;GO:0021846;GO:0021853;GO:0030154;GO:0030900;GO:0042127;GO:0044241;GO:0046622;GO:0048666;GO:0072148;	GO:0005634;GO:0005634;GO:0005634;
ENSMUSG00000035673	4850	4964.61	3300.69	-0.588935	8.16094e-16	9.03601e-14	Down	Sbno2	216161	strawberry notch 2	Q7TNB8	NA	NA	GO:0005515;	GO:0001503;GO:0002281;GO:0002281;GO:0002281;GO:0006355;GO:0030154;GO:0030282;GO:0030316;GO:0030316;GO:0045892;GO:0045892;GO:0045892;GO:0045944;GO:0045944;GO:0050727;GO:0050727;GO:0050727;GO:0061430;GO:0071222;GO:0071348;GO:0071354;GO:0071354;GO:0071354;GO:0072674;GO:0072675;GO:1990830;	GO:0005634;
ENSMUSG00000035683	2955	156.98	83.7962	-0.906238	0.000545388	0.00796677	Down	Melk	17279	maternal embryonic leucine zipper kinase	Q61846	K08799 MELK; maternal embryonic leucine zipper kinase [EC:2.7.11.1]	NA	GO:0000166;GO:0004672;GO:0004674;GO:0004674;GO:0004674;GO:0004674;GO:0004674;GO:0004715;GO:0004715;GO:0005509;GO:0005515;GO:0005524;GO:0008289;GO:0016301;GO:0016740;	GO:0006468;GO:0006915;GO:0007049;GO:0008283;GO:0008631;GO:0016310;GO:0035556;GO:0043065;GO:0046777;GO:0061351;	GO:0005634;GO:0005737;GO:0005737;GO:0005886;GO:0005938;GO:0016020;
ENSMUSG00000035783	2035	57328.1	35699.8	-0.683291	2.69903e-14	2.55845e-12	Down	Acta2	11475	actin, alpha 2, smooth muscle, aorta	P62737	K12313 ACTA2; actin, aortic smooth muscle	mmu04270:Vascular smooth muscle contraction;mmu04371:Apelin signaling pathway;mmu04926:Relaxin signaling pathway;	GO:0000166;GO:0005515;GO:0005524;GO:0019901;	GO:0006936;GO:0008217;GO:0014829;GO:0014829;GO:0061041;GO:0061870;GO:0061874;GO:0070374;GO:2000491;	GO:0001725;GO:0005737;GO:0005737;GO:0005737;GO:0005856;GO:0015629;GO:0015629;GO:0015629;GO:0030485;
ENSMUSG00000035861	4171	157.995	38.8426	-2.02377	4.25704e-11	2.98355e-09	Down	Tmprss11b	319875	transmembrane protease, serine 11B	Q14C59	K09751 TMPRSS11B; transmembrane protease serine 11B [EC:3.4.21.-]	NA	GO:0004252;GO:0008233;GO:0008236;GO:0016787;	GO:0006508;	GO:0005576;GO:0005886;GO:0005887;GO:0016020;GO:0016021;
ENSMUSG00000035934	3632	820.744	522.653	-0.650939	1.10792e-06	3.50911e-05	Down	Pknox2	208076	Pbx/knotted 1 homeobox 2	Q8BG99	NA	NA	GO:0000977;GO:0003677;GO:0003785;GO:0043565;GO:0043565;GO:0051015;	GO:0006355;GO:0006357;	GO:0005634;GO:0005634;GO:0005654;GO:0005737;GO:0015629;GO:0015630;GO:0045171;
ENSMUSG00000036030	9148	69.7382	167.171	1.26314	3.57547e-05	0.0007774	Up	Prtg	235472	protogenin	Q2EY15	NA	NA	GO:0038023;GO:0098632;	GO:0007156;GO:0007275;GO:0007411;GO:0050768;GO:0050768;GO:0051260;GO:0070593;	GO:0005886;GO:0005886;GO:0016020;GO:0016021;GO:0030424;
ENSMUSG00000036040	5956	325.615	69.4698	-2.22598	2.40964e-20	4.12329e-18	Down	Adamtsl2	77794	ADAMTS-like 2	Q7TSK7	NA	NA	GO:0008233;GO:0050436;GO:0008233;GO:0050436;	GO:0030198;GO:0030512;GO:0030512;GO:0060481;GO:0030198;GO:0030512;GO:0030512;GO:0060481;	GO:0005576;GO:0031012;GO:0005576;GO:0031012;
ENSMUSG00000036223	2630	81.7425	41.0397	-0.996368	0.00278441	0.0300877	Down	Ska1	66468	spindle and kinetochore associated complex subunit 1	Q9CPV1	NA	NA	GO:0008017;GO:0008017;GO:0008017;GO:0008017;	GO:0000278;GO:0000278;GO:0007049;GO:0007059;GO:0007059;GO:0031110;GO:0031110;GO:0051301;GO:0051301;GO:0000278;GO:0000278;GO:0007049;GO:0007059;GO:0007059;GO:0031110;GO:0031110;GO:0051301;GO:0051301;	GO:0000775;GO:0000776;GO:0000940;GO:0000940;GO:0005694;GO:0005737;GO:0005856;GO:0005874;GO:0005876;GO:0005876;GO:0015630;GO:0072686;GO:0000775;GO:0000776;GO:0000940;GO:0000940;GO:0005694;GO:0005737;GO:0005856;GO:0005874;GO:0005876;GO:0005876;GO:0015630;GO:0072686;
ENSMUSG00000036298	6536	400.094	227.922	-0.813308	0.000108601	0.00205298	Down	Slc2a13	239606	solute carrier family 2 (facilitated glucose transporter), member 13	Q3UHK1	K08150 SLC2A13; MFS transporter, SP family, solute carrier family 2 (myo-inositol transporter), member 13	NA	GO:0005366;GO:0022857;	GO:0055085;	GO:0005887;GO:0016020;GO:0016021;
ENSMUSG00000036333	7409	11169.1	7369.35	-0.59969	2.16686e-06	6.41584e-05	Down	Kidins220	77480	kinase D-interacting substrate 220	A0A1Y7VME9	K12460 KIDINS220; ankyrin repeat-rich membrane spanning protein	mmu04722:Neurotrophin signaling pathway;	GO:0019887;GO:0019887;GO:0019901;GO:0030165;GO:0030165;GO:0019887;GO:0019887;GO:0019901;GO:0030165;GO:0030165;	GO:0001701;GO:0010976;GO:0038180;GO:0038180;GO:0048813;GO:1990090;GO:0001701;GO:0010976;GO:0038180;GO:0038180;GO:0048813;GO:1990090;	GO:0005770;GO:0032991;GO:0005770;GO:0032991;
ENSMUSG00000036446	2448	338.971	204.207	-0.732309	1.81089e-05	0.000429141	Down	Lum	17022	lumican	P51885	K08122 LUM; lumican	mmu05205:Proteoglycans in cancer;	GO:0005518;GO:0005518;GO:0030021;	GO:0007601;GO:0030199;GO:0032914;GO:0045944;	GO:0005576;GO:0005583;GO:0005615;GO:0031012;GO:0031012;GO:0062023;
ENSMUSG00000036764	3025	45.042	84.3846	0.904496	0.00436113	0.0431236	Up	Dnajc12	30045	DnaJ heat shock protein family (Hsp40) member C12	Q9R022	K09532 DNAJC12; DnaJ homolog subfamily C member 12	NA	NA	GO:0008150;GO:0008150;GO:0008150;	GO:0005737;GO:0005737;GO:0005737;
ENSMUSG00000036782	3349	542.184	295.838	-0.872657	4.36893e-08	1.82746e-06	Down	Klhl13	67455	kelch-like 13	Q80TF4	K10447 KLHL9_13; kelch-like protein 9/13	mmu04120:Ubiquitin mediated proteolysis;	GO:0004842;	GO:0007049;GO:0016567;GO:0032465;GO:0051301;	GO:0030496;GO:0031463;
ENSMUSG00000036819	4542	311.42	656.57	1.07575	4.95741e-14	4.56775e-12	Up	Jmjd4	194952	jumonji domain containing 4	Q8BFT6	NA	NA	GO:0016491;GO:0016706;GO:0046872;GO:0051213;	GO:0018126;GO:0045905;GO:0055114;	GO:0005737;
ENSMUSG00000036880	1516	2522.53	3844.94	0.607958	1.28427e-11	9.6145e-10	Up	Acaa2	52538	acetyl-Coenzyme A acyltransferase 2 (mitochondrial 3-oxoacyl-Coenzyme A thiolase)	Q8BWT1	K07508 ACAA2; acetyl-CoA acyltransferase 2 [EC:2.3.1.16]	mmu00062:Fatty acid elongation;mmu00071:Fatty acid degradation;mmu00280:Valine, leucine and isoleucine degradation;mmu01100:Metabolic pathways;mmu01212:Fatty acid metabolism;	GO:0003824;GO:0003985;GO:0003988;GO:0003988;GO:0016740;GO:0016746;GO:0016747;	GO:0006084;GO:0006629;GO:0006631;GO:0006635;GO:0006635;GO:0071456;GO:1901029;GO:1902109;	GO:0005739;GO:0005739;GO:0005739;GO:0005743;GO:0005759;
ENSMUSG00000037031	3638	2120	3210.85	0.598651	6.37373e-12	4.88257e-10	Up	Tspan15	70423	tetraspanin 15	F7BWT7	K17297 TSPAN15; tetraspanin-15	NA	GO:0019899;GO:0019899;	GO:0051604;GO:0051604;GO:0051604;GO:0072659;GO:0072659;	GO:0005768;GO:0005886;GO:0005887;GO:0009986;GO:0016020;GO:0016021;GO:0097197;
ENSMUSG00000037033	3361	235.601	48.9862	-2.25805	8.56473e-16	9.40407e-14	Down	Clca3b	229927	chloride channel accessory 3B	Q91ZF5	K05030 CLCA3_4; calcium-activated chloride channel regulator 3/4	mmu04924:Renin secretion;mmu04972:Pancreatic secretion;	GO:0005229;GO:0005229;	NA	GO:0005887;GO:0005887;
ENSMUSG00000037035	4255	10852.2	7155.51	-0.600849	3.05928e-16	3.56718e-14	Down	Inhbb	16324	inhibin beta-B	Q04999	K22687 INHBB; inhibin beta B chain	mmu04060:Cytokine-cytokine receptor interaction;mmu04350:TGF-beta signaling pathway;mmu04550:Signaling pathways regulating pluripotency of stem cells;	GO:0005125;GO:0005160;GO:0005179;GO:0008083;GO:0034711;GO:0042803;GO:0046982;	GO:0001654;GO:0009267;GO:0010862;GO:0032869;GO:0032924;GO:0042981;GO:0043408;GO:0044320;GO:0045444;GO:0046676;GO:0046881;GO:0046882;GO:0048178;GO:0048468;GO:0048599;GO:0060279;GO:0060395;GO:0071397;GO:2001235;	GO:0005576;GO:0005615;GO:0005615;GO:0005615;GO:0043513;GO:0048471;GO:0048471;GO:0071944;
ENSMUSG00000037185	3919	2278.72	1331.54	-0.774641	5.26331e-06	0.000141819	Down	Krt80	74127	keratin 80	Q0VBK2	K07605 KRT2; type II keratin, basic	NA	GO:0005198;	NA	GO:0005737;GO:0005882;GO:0045095;GO:0045111;
ENSMUSG00000037280	3798	212.147	46.6844	-2.18055	1.42498e-09	7.85588e-08	Down	Galnt6	207839	polypeptide N-acetylgalactosaminyltransferase 6	Q8C7U7	K00710 GALNT; polypeptide N-acetylgalactosaminyltransferase [EC:2.4.1.41]	mmu00512:Mucin type O-glycan biosynthesis;mmu01100:Metabolic pathways;	GO:0004653;GO:0016740;GO:0016757;GO:0030246;GO:0046872;	NA	GO:0005794;GO:0005794;GO:0016020;GO:0016021;GO:0048471;
ENSMUSG00000037362	2869	178.88	321.084	0.842905	1.19712e-05	0.000298171	Up	Ccn3	18133	cellular communication network factor 3	Q64299	K23571 NOV; insulin-like growth factor-binding protein 9	NA	GO:0005112;GO:0005178;GO:0005178;GO:0005520;GO:0008083;GO:0008201;	GO:0001525;GO:0002062;GO:0007155;GO:0010468;GO:0010761;GO:0010832;GO:0014909;GO:0030308;GO:0033627;GO:0035767;GO:0044342;GO:0045747;GO:0046676;GO:0048659;GO:0048659;GO:0050728;GO:0060326;GO:0060392;GO:0060548;GO:0061484;GO:0071603;GO:0090027;GO:1901223;GO:1902731;GO:1904057;GO:1990523;	GO:0005576;GO:0005615;GO:0005737;GO:0005921;GO:0030054;GO:0030424;GO:0030425;GO:0031012;GO:0043025;GO:0043231;GO:0062023;
ENSMUSG00000037418	2080	103.44	36.9033	-1.48687	1.7688e-06	5.34533e-05	Down	Best1	24115	bestrophin 1	O88870	K13878 BEST1; bestrophin-1	NA	GO:0005254;GO:0005254;GO:0042802;	GO:0006811;GO:0006821;GO:0030321;GO:0050908;GO:0051924;GO:1902476;	GO:0005886;GO:0016020;GO:0016021;GO:0016323;GO:0034707;GO:0034707;
ENSMUSG00000037434	5244	102.46	258.893	1.33584	1.23519e-09	6.89614e-08	Up	Slc30a1	22782	solute carrier family 30 (zinc transporter), member 1	Q60738	K14688 SLC30A1; solute carrier family 30 (zinc transporter), member 1	mmu04978:Mineral absorption;	GO:0005385;GO:0008324;GO:0019855;GO:0019855;GO:0019855;GO:0005385;GO:0008324;GO:0019855;GO:0019855;GO:0019855;	GO:0001701;GO:0006811;GO:0006812;GO:0006829;GO:0006829;GO:0006874;GO:0006882;GO:0006882;GO:0046929;GO:0055085;GO:0070509;GO:0070574;GO:0071584;GO:0071585;GO:0090281;GO:0001701;GO:0006811;GO:0006812;GO:0006829;GO:0006829;GO:0006874;GO:0006882;GO:0006882;GO:0046929;GO:0055085;GO:0070509;GO:0070574;GO:0071584;GO:0071585;GO:0090281;	GO:0005737;GO:0005783;GO:0005783;GO:0005794;GO:0005794;GO:0005886;GO:0005886;GO:0016020;GO:0016021;GO:0030315;GO:0031965;GO:0098685;GO:0099061;GO:0005737;GO:0005783;GO:0005783;GO:0005794;GO:0005794;GO:0005886;GO:0005886;GO:0016020;GO:0016021;GO:0030315;GO:0031965;GO:0098685;GO:0099061;
ENSMUSG00000037490	4167	3.78515	25.797	2.77405	0.00299178	0.031893	Up	Slc2a12	353169	solute carrier family 2 (facilitated glucose transporter), member 12	Q8BFW9	K08149 SLC2A12; MFS transporter, SP family, solute carrier family 2 (facilitated glucose transporter), member 12	NA	GO:0005351;GO:0005515;GO:0022857;GO:0005351;GO:0005515;GO:0022857;	GO:0008643;GO:0055085;GO:1904659;GO:0008643;GO:0055085;GO:1904659;	GO:0005887;GO:0016020;GO:0016021;GO:0005887;GO:0016020;GO:0016021;
ENSMUSG00000037649	2005	105.568	191.781	0.860295	6.16655e-05	0.00125775	Up	H2-DMa	14998	histocompatibility 2, class II, locus DMa	Q31621	K06752 MHC2; MHC class II antigen	mmu04145:Phagosome;mmu04514:Cell adhesion molecules (CAMs);mmu04612:Antigen processing and presentation;mmu04640:Hematopoietic cell lineage;mmu04658:Th1 and Th2 cell differentiation;mmu04659:Th17 cell differentiation;mmu04672:Intestinal immune network for IgA production;mmu04940:Type I diabetes mellitus;mmu05140:Leishmaniasis;mmu05145:Toxoplasmosis;mmu05150:Staphylococcus aureus infection;mmu0515…	GO:0005515;GO:0023026;	GO:0002376;GO:0002503;GO:0002504;GO:0002636;GO:0002922;GO:0006955;GO:0015031;GO:0016064;GO:0019882;GO:0019882;GO:0019886;GO:0019886;GO:0045059;GO:0045582;GO:0048839;GO:0050778;GO:0051085;GO:0051085;GO:0065003;	GO:0005764;GO:0005765;GO:0005768;GO:0005770;GO:0005771;GO:0009986;GO:0010008;GO:0016020;GO:0016021;GO:0042613;GO:0043231;
ENSMUSG00000037709	5786	49.1189	111.398	1.1831	0.000946933	0.0125353	Up	Fam13a	58909	family with sequence similarity 13, member A	Q8BGI4	NA	NA	GO:0003674;	GO:0008150;	GO:0005575;
ENSMUSG00000037855	4259	675.629	1130.53	0.742693	2.85357e-10	1.82517e-08	Up	Zfp365	216049	zinc finger protein 365	Q8BG89	K16737 ZNF365; protein ZNF365	NA	GO:0042802;GO:0042803;GO:0046872;	GO:0000281;GO:0000723;GO:0000723;GO:0007399;GO:0010569;GO:0010977;GO:0021687;GO:0033566;GO:0048714;GO:0048714;GO:0060997;GO:0110026;GO:0140059;	GO:0000930;GO:0005737;GO:0005813;GO:0005815;GO:0005856;GO:0043231;
ENSMUSG00000037868	2965	331.728	188.344	-0.819275	3.73229e-05	0.000805787	Down	Egr2	13654	early growth response 2	Q3U207	K12496 EGR2; early growth response protein 2	mmu04625:C-type lectin receptor signaling pathway;mmu05161:Hepatitis B;mmu05166:Human T-cell leukemia virus 1 infection;mmu05203:Viral carcinogenesis;	GO:0000978;GO:0000981;GO:0001102;GO:0001228;GO:0003676;GO:0003677;GO:0003682;GO:0003700;GO:0003700;GO:0003700;GO:0005515;GO:0016740;GO:0031625;GO:0044212;GO:0046872;GO:0061665;GO:0071837;GO:0000978;GO:0000981;GO:0001102;GO:0001228;GO:0003676;GO:0003677;GO:0003682;GO:0003700;GO:0003700;GO:0003700;GO:0005515;GO:0016740;GO:0031625;GO:0044212;GO:0046872;GO:0061665;GO:0071837;	GO:0006355;GO:0006357;GO:0006366;GO:0006611;GO:0007622;GO:0007622;GO:0008045;GO:0014037;GO:0016925;GO:0021569;GO:0021612;GO:0021660;GO:0021666;GO:0030278;GO:0032868;GO:0035284;GO:0035914;GO:0042552;GO:0045444;GO:0045893;GO:0045944;GO:0045944;GO:0071310;GO:0006355;GO:0006357;GO:0006366;GO:0006611;GO:0007622;GO:0007622;GO:0008045;GO:0014037;GO:0016925;GO:0021569;GO:0021612;GO:0021660;GO:0021666;GO:…	GO:0005634;GO:0005634;GO:0005634;GO:0005654;GO:0005737;GO:0043231;GO:0005634;GO:0005634;GO:0005634;GO:0005654;GO:0005737;GO:0043231;
ENSMUSG00000037940	8067	1580.02	772.036	-1.03304	6.6627e-19	9.8638e-17	Down	Inpp4b	234515	inositol polyphosphate-4-phosphatase, type II	E9PVM1	K01109 INPP4; inositol polyphosphate-4-phosphatase [EC:3.1.3.66]	mmu00562:Inositol phosphate metabolism;mmu01100:Metabolic pathways;mmu04070:Phosphatidylinositol signaling system;	GO:0008289;GO:0016316;GO:0016316;GO:0016787;GO:0034593;GO:0034594;GO:0034597;GO:0008289;GO:0016316;GO:0016316;GO:0016787;GO:0034593;GO:0034594;GO:0034597;GO:0008289;GO:0016316;GO:0016316;GO:0016787;GO:0034593;GO:0034594;GO:0034597;GO:0008289;GO:0016316;GO:0016316;GO:0016787;GO:0034593;GO:0034594;GO:0034597;GO:0008289;GO:0016316;GO:0016316;GO:0016787;GO:0034593;GO:0034594;GO:0034597;GO:0008289;GO:…	GO:0006874;GO:0045671;GO:0045671;GO:0046822;GO:0046850;GO:0046855;GO:0046856;GO:0051896;GO:0006874;GO:0045671;GO:0045671;GO:0046822;GO:0046850;GO:0046855;GO:0046856;GO:0051896;GO:0006874;GO:0045671;GO:0045671;GO:0046822;GO:0046850;GO:0046855;GO:0046856;GO:0051896;GO:0006874;GO:0045671;GO:0045671;GO:0046822;GO:0046850;GO:0046855;GO:0046856;GO:0051896;GO:0006874;GO:0045671;GO:0045671;GO:0046822;GO:…	GO:0005737;GO:0005737;GO:0005794;GO:0005737;GO:0005737;GO:0005794;GO:0005737;GO:0005737;GO:0005794;GO:0005737;GO:0005737;GO:0005794;GO:0005737;GO:0005737;GO:0005794;GO:0005737;GO:0005737;GO:0005794;GO:0005737;GO:0005737;GO:0005794;
ENSMUSG00000038079	1869	660.405	1055.15	0.676508	4.78906e-10	2.88283e-08	Up	Tmem237	381259	transmembrane protein 237	Q3V0J1	K22765 TMEM237; transmembrane protein 237	NA	GO:0003674;	GO:0030030;GO:0030111;GO:0030111;GO:0060271;GO:0060271;	GO:0005929;GO:0016020;GO:0016021;GO:0035869;GO:0035869;GO:0042995;
ENSMUSG00000038175	3065	1585.89	787.247	-1.0096	4.83529e-21	8.84858e-19	Down	Mylip	218203	myosin regulatory light chain interacting protein	Q8BM54	K10637 MYLIP; E3 ubiquitin-protein ligase MYLIP [EC:2.3.2.27]	mmu04979:Cholesterol metabolism;	GO:0004842;GO:0004842;GO:0004842;GO:0008092;GO:0016740;GO:0046872;GO:0061630;GO:0061630;	GO:0006511;GO:0006511;GO:0007399;GO:0010977;GO:0010989;GO:0016567;GO:0031648;GO:0032803;GO:0042632;GO:0045732;GO:0071404;	GO:0005737;GO:0005856;GO:0005886;GO:0016020;
ENSMUSG00000038267	6251	240.611	380.903	0.662425	6.81509e-05	0.00136468	Up	Slc22a23	73102	solute carrier family 22, member 23	Q3UHH2	K08215 SLC22A23; MFS transporter, OCT family, solute carrier family 22 (organic anion transporter), member 23	NA	GO:0022857;	GO:0006811;GO:0055085;	GO:0016020;GO:0016021;
ENSMUSG00000038379	2871	257.526	159.006	-0.696962	0.000712155	0.00993999	Down	Ttk	22137	Ttk protein kinase	Q8BX21	K08866 TTK; serine/threonine-protein kinase TTK/MPS1 [EC:2.7.12.1]	mmu04110:Cell cycle;	GO:0000166;GO:0004672;GO:0004674;GO:0004674;GO:0004712;GO:0004712;GO:0004713;GO:0005524;GO:0016301;GO:0016740;GO:0042803;GO:0043515;GO:0000166;GO:0004672;GO:0004674;GO:0004674;GO:0004712;GO:0004712;GO:0004713;GO:0005524;GO:0016301;GO:0016740;GO:0042803;GO:0043515;GO:0000166;GO:0004672;GO:0004674;GO:0004674;GO:0004712;GO:0004712;GO:0004713;GO:0005524;GO:0016301;GO:0016740;GO:0042803;GO:0043515;	GO:0006468;GO:0007059;GO:0007093;GO:0007094;GO:0007094;GO:0016310;GO:0016321;GO:0018105;GO:0018105;GO:0018107;GO:0018108;GO:0033316;GO:0033316;GO:0034501;GO:0034501;GO:0034502;GO:0046777;GO:0051304;GO:1903096;GO:0006468;GO:0007059;GO:0007093;GO:0007094;GO:0007094;GO:0016310;GO:0016321;GO:0018105;GO:0018105;GO:0018107;GO:0018108;GO:0033316;GO:0033316;GO:0034501;GO:0034501;GO:0034502;GO:0046777;GO:…	GO:0000776;GO:0000776;GO:0005634;GO:0005737;GO:0005819;GO:0016020;GO:0000776;GO:0000776;GO:0005634;GO:0005737;GO:0005819;GO:0016020;GO:0000776;GO:0000776;GO:0005634;GO:0005737;GO:0005819;GO:0016020;
ENSMUSG00000038437	7274	1398.66	2109.23	0.592955	2.22307e-06	6.55283e-05	Up	Mllt6	246198	myeloid/lymphoid or mixed-lineage leukemia; translocated to, 6	B1AR10	K23588 MLLT6_10; protein AF-17/10	NA	GO:0031491;GO:0042393;GO:0031491;GO:0042393;GO:0031491;GO:0042393;	GO:0003014;GO:0007588;GO:0010765;GO:0035811;GO:0035812;GO:0036359;GO:0045944;GO:2001161;GO:0003014;GO:0007588;GO:0010765;GO:0035811;GO:0035812;GO:0036359;GO:0045944;GO:2001161;GO:0003014;GO:0007588;GO:0010765;GO:0035811;GO:0035812;GO:0036359;GO:0045944;GO:2001161;	GO:0005575;GO:0005575;GO:0005575;
ENSMUSG00000038463	3095	4594.24	2894.24	-0.66667	2.25195e-21	4.17911e-19	Down	Olfml2b	320078	olfactomedin-like 2B	Q8BY24	NA	NA	GO:0042803;GO:0050840;GO:0042803;GO:0050840;	GO:0030198;GO:0030198;	GO:0005576;GO:0005615;GO:0031012;GO:0005576;GO:0005615;GO:0031012;
ENSMUSG00000038508	1545	113.353	565.577	2.31986	1.77234e-30	6.67209e-28	Up	Gdf15	23886	growth differentiation factor 15	Q9Z0J7	K05504 GDF15; growth differentiation factor 15	mmu04060:Cytokine-cytokine receptor interaction;	GO:0005125;GO:0005160;GO:0008083;GO:0042803;GO:0042803;	GO:0000187;GO:0000187;GO:0002023;GO:0002023;GO:0002023;GO:0010862;GO:0030509;GO:0035860;GO:0040015;GO:0042981;GO:0043408;GO:0043410;GO:0048468;GO:0051897;GO:0060395;GO:0060395;GO:0060400;GO:1901741;	GO:0005576;GO:0005576;GO:0005615;GO:0005615;GO:0005634;GO:0005737;GO:0005794;
ENSMUSG00000038535	5910	1292.89	843.469	-0.61585	6.0091e-09	2.94334e-07	Down	Zfp280d	235469	zinc finger protein 280D	V9GWW1	NA	NA	GO:0003676;GO:0003677;GO:0003700;GO:0046872;GO:0003676;GO:0003677;GO:0003700;GO:0046872;GO:0003676;GO:0003677;GO:0003700;GO:0046872;	GO:0006355;GO:0006355;GO:0006355;	GO:0005634;GO:0005634;GO:0005634;
ENSMUSG00000038539	1816	2271.22	5138.5	1.17783	1.77126e-39	9.72421e-37	Up	Atf5	107503	activating transcription factor 5	Q3UJF3	K09044 ATF5; activating transcription factor 5	NA	GO:0000977;GO:0000977;GO:0000981;GO:0003677;GO:0003682;GO:0003682;GO:0003700;GO:0005515;GO:0015631;GO:0019900;GO:0031072;GO:0043565;GO:0043565;GO:0044212;GO:0044212;GO:0000977;GO:0000977;GO:0000981;GO:0003677;GO:0003682;GO:0003682;GO:0003700;GO:0005515;GO:0015631;GO:0019900;GO:0031072;GO:0043565;GO:0043565;GO:0044212;GO:0044212;	GO:0006355;GO:0006357;GO:0006357;GO:0007623;GO:0008285;GO:0009791;GO:0010468;GO:0021889;GO:0021891;GO:0021930;GO:0021988;GO:0035264;GO:0043066;GO:0043066;GO:0045444;GO:0045444;GO:0045892;GO:0045893;GO:0045944;GO:0046605;GO:0048712;GO:0050768;GO:1902750;GO:0006355;GO:0006357;GO:0006357;GO:0007623;GO:0008285;GO:0009791;GO:0010468;GO:0021889;GO:0021891;GO:0021930;GO:0021988;GO:0035264;GO:0043066;GO:…	GO:0005634;GO:0005634;GO:0005634;GO:0005654;GO:0005667;GO:0005737;GO:0005813;GO:0005829;GO:0005856;GO:0005634;GO:0005634;GO:0005634;GO:0005654;GO:0005667;GO:0005737;GO:0005813;GO:0005829;GO:0005856;
ENSMUSG00000038550	1939	61.7237	152.921	1.30994	9.30331e-07	3.01922e-05	Up	Ciart	229599	circadian associated repressor of transcription	Q3TQ03	K21599 CIART; circadian-associated transcriptional repressor	NA	GO:0000976;GO:0000980;GO:0000980;GO:0005515;GO:0070888;GO:0000976;GO:0000980;GO:0000980;GO:0005515;GO:0070888;	GO:0032922;GO:0032922;GO:0045475;GO:0045892;GO:0045892;GO:0048511;GO:0032922;GO:0032922;GO:0045475;GO:0045892;GO:0045892;GO:0048511;	GO:0005634;GO:0005634;GO:0005634;GO:0005634;
ENSMUSG00000038591	4587	84.5251	177.34	1.06693	0.000110318	0.00207058	Up	Colec10	239447	collectin sub-family member 10	Q8CF98	K10065 COLEC10; collectin sub-family member 10	NA	GO:0005537;GO:0005537;GO:0030246;GO:0042056;GO:0048029;	GO:0006952;GO:0007157;GO:0009792;GO:0032502;GO:1904888;	GO:0005576;GO:0005581;GO:0005615;GO:0005615;GO:0005634;GO:0005737;GO:0005794;GO:0005829;
ENSMUSG00000038670	3611	298.764	165.386	-0.853314	3.43147e-05	0.000751048	Down	Mybpc2	233199	myosin binding protein C, fast-type	Q5XKE0	K12558 MYBPC2; myosin-binding protein C, fast-type	NA	GO:0003779;GO:0005200;GO:0008307;GO:0051015;GO:0051371;	GO:0006936;GO:0006936;GO:0007155;GO:0030240;GO:0030241;GO:0045214;GO:0048739;GO:0055003;GO:0055008;GO:0071688;	GO:0005856;GO:0005865;GO:0030017;GO:0030018;GO:0031430;GO:0032982;
ENSMUSG00000038776	1741	3099.98	5724.91	0.885082	7.23029e-30	2.57476e-27	Up	Ephx1	13849	epoxide hydrolase 1, microsomal	Q9D379	K01253 EPHX1; microsomal epoxide hydrolase [EC:3.3.2.9]	mmu00980:Metabolism of xenobiotics by cytochrome P450;mmu04976:Bile secretion;mmu05204:Chemical carcinogenesis;	GO:0003824;GO:0004301;GO:0016787;GO:0019899;GO:0033961;GO:0003824;GO:0004301;GO:0016787;GO:0019899;GO:0033961;	GO:0006725;GO:0009636;GO:0014070;GO:0019439;GO:0034312;GO:0097176;GO:0006725;GO:0009636;GO:0014070;GO:0019439;GO:0034312;GO:0097176;	GO:0005783;GO:0005886;GO:0016020;GO:0016021;GO:0043231;GO:0005783;GO:0005886;GO:0016020;GO:0016021;GO:0043231;
ENSMUSG00000038836	4819	103.126	184.988	0.842939	6.73034e-05	0.00135254	Up	Agbl3	76223	ATP/GTP binding protein-like 3	Q8CDP0	K23437 AGBL2_3; cytosolic carboxypeptidase protein 2/3 [EC:3.4.17.-]	NA	GO:0004180;GO:0004181;GO:0004181;GO:0008233;GO:0008237;GO:0008270;GO:0016787;GO:0046872;	GO:0006508;GO:0035610;GO:0035610;	GO:0005575;GO:0005737;
ENSMUSG00000039308	3907	860.11	545.626	-0.656147	0.000680162	0.00956437	Down	Ndst2	17423	N-deacetylase/N-sulfotransferase (heparan glucosaminyl) 2	P52850	K02577 NDST2; heparan sulfate N-deacetylase/N-sulfotransferase NDST2 [EC:3.1.1.- 2.8.2.-]	mmu00534:Glycosaminoglycan biosynthesis - heparan sulfate / heparin;mmu01100:Metabolic pathways;	GO:0003824;GO:0008146;GO:0015016;GO:0015016;GO:0016740;GO:0016787;GO:0019213;GO:0019213;GO:0034483;GO:0042328;	GO:0002002;GO:0006024;GO:0008152;GO:0009987;GO:0015012;GO:0015012;GO:0015014;	GO:0005794;GO:0005794;GO:0016020;GO:0016021;
ENSMUSG00000039396	3085	110.207	62.1211	-0.825199	0.00524166	0.049615	Down	Neil3	234258	nei like 3 (E. coli)	Q8K203	K10569 NEIL3; endonuclease VIII-like 3	mmu03410:Base excision repair;	GO:0000405;GO:0003676;GO:0003677;GO:0003684;GO:0003690;GO:0003697;GO:0003697;GO:0003824;GO:0003906;GO:0003906;GO:0003906;GO:0008270;GO:0016787;GO:0016798;GO:0016799;GO:0016829;GO:0019104;GO:0019104;GO:0019104;GO:0046872;	GO:0006281;GO:0006284;GO:0006284;GO:0006284;GO:0006289;GO:0006974;GO:0008152;	GO:0005634;GO:0005634;GO:0005634;GO:0005654;
ENSMUSG00000039518	2678	25.4346	109.635	2.10673	1.88691e-10	1.24934e-08	Up	Cdsn	386463	corneodesmosin	Q7TPC1	K23457 CDSN; corneodesmosin	NA	GO:0042803;	GO:0043589;GO:0098609;	GO:0005576;GO:0005615;GO:0030057;
ENSMUSG00000039629	5370	185.245	113.637	-0.704982	0.00350545	0.036397	Down	Strip2	320609	striatin interacting protein 2	B2RW20	NA	NA	GO:0003674;GO:0003674;	GO:0007010;GO:0008360;GO:0016477;GO:0007010;GO:0008360;GO:0016477;	GO:0005737;GO:0005829;GO:0005737;GO:0005829;
ENSMUSG00000039748	7796	61.9022	19.3584	-1.68253	9.10851e-05	0.00176751	Down	Exo1	26909	exonuclease 1	Q9QZ11	K10746 EXO1; exonuclease 1 [EC:3.1.-.-]	mmu03430:Mismatch repair;	GO:0003677;GO:0003682;GO:0003824;GO:0004518;GO:0004519;GO:0004527;GO:0008409;GO:0016787;GO:0016788;GO:0017108;GO:0035312;GO:0035312;GO:0045145;GO:0046872;GO:0048256;GO:0048256;GO:0051908;	GO:0002376;GO:0002455;GO:0006139;GO:0006281;GO:0006298;GO:0006298;GO:0006310;GO:0006310;GO:0006974;GO:0016446;GO:0045190;GO:0051321;	GO:0005634;GO:0005634;GO:0005654;GO:0005886;GO:0016604;
ENSMUSG00000039824	1243	1167.4	773.676	-0.593254	9.33232e-09	4.40726e-07	Down	Myl6b	216459	myosin, light polypeptide 6B	Q8CI43	K12751 MYL6; myosin light chain 6	mmu04270:Vascular smooth muscle contraction;mmu04530:Tight junction;mmu04921:Oxytocin signaling pathway;	GO:0003774;GO:0005509;GO:0008307;	GO:0006936;GO:0007519;GO:0030049;	GO:0016459;GO:0016461;
ENSMUSG00000039899	3788	63.9622	27.3244	-1.22793	0.0038241	0.0390592	Down	Fgl2	14190	fibrinogen-like protein 2	Q544K3	NA	NA	GO:0008233;GO:0008233;	GO:0002291;GO:0002381;GO:0002605;GO:0002617;GO:0019835;GO:0043381;GO:0050687;GO:0002291;GO:0002381;GO:0002605;GO:0002617;GO:0019835;GO:0043381;GO:0050687;	GO:0005576;GO:0005576;
ENSMUSG00000040010	3517	2039.39	5952.53	1.54527	1.16143e-77	7.6515e-74	Up	Slc7a5	20539	solute carrier family 7 (cationic amino acid transporter, y+ system), member 5	Q9Z127	K13780 SLC7A5; solute carrier family 7 (L-type amino acid transporter), member 5	mmu04150:mTOR signaling pathway;mmu05230:Central carbon metabolism in cancer;	GO:0015179;GO:0015179;GO:0022857;	GO:0003333;GO:0006865;GO:0007275;GO:0007399;GO:0015807;GO:0030154;GO:0055085;	GO:0005737;GO:0005829;GO:0005886;GO:0016020;GO:0016021;GO:0043231;
ENSMUSG00000040181	3106	118.763	227.563	0.938994	4.18091e-06	0.000115239	Up	Fmo1	14261	flavin containing monooxygenase 1	Q8C9C1	K00485 FMO; dimethylaniline monooxygenase (N-oxide forming) [EC:1.14.13.8]	mmu00982:Drug metabolism - cytochrome P450;	GO:0004497;GO:0004497;GO:0004497;GO:0004499;GO:0016491;GO:0050660;GO:0050661;GO:0004497;GO:0004497;GO:0004497;GO:0004499;GO:0016491;GO:0050660;GO:0050661;GO:0004497;GO:0004497;GO:0004497;GO:0004499;GO:0016491;GO:0050660;GO:0050661;	GO:0006082;GO:0009404;GO:0017144;GO:0070995;GO:0006082;GO:0009404;GO:0017144;GO:0070995;GO:0006082;GO:0009404;GO:0017144;GO:0070995;	GO:0005783;GO:0016020;GO:0016021;GO:0043231;GO:0005783;GO:0016020;GO:0016021;GO:0043231;GO:0005783;GO:0016020;GO:0016021;GO:0043231;
ENSMUSG00000040204	2530	226.303	103.614	-1.12894	1.0184e-05	0.000256567	Down	Pclaf	68026	PCNA clamp associated factor	Q9CQX4	NA	NA	GO:0003682;GO:0003682;	GO:0006260;GO:0006281;GO:0006974;GO:0007098;GO:0009411;GO:0019985;GO:0019985;GO:0051726;	GO:0005634;GO:0005634;GO:0005737;GO:0005813;GO:0048471;
ENSMUSG00000040268	3777	1513.11	1002.63	-0.593587	3.83983e-07	1.3564e-05	Down	Plekha1	101476	pleckstrin homology domain containing, family A (phosphoinositide binding specific) member 1	D3YU01	NA	NA	GO:0008289;GO:0030165;GO:0030165;GO:0043325;GO:0008289;GO:0030165;GO:0030165;GO:0043325;	GO:0001553;GO:0007283;GO:0008209;GO:0008210;GO:0008585;GO:0009791;GO:0014065;GO:0031529;GO:0033327;GO:0035264;GO:0045184;GO:0048008;GO:0048705;GO:0050853;GO:0051898;GO:0060021;GO:0060325;GO:0070301;GO:0001553;GO:0007283;GO:0008209;GO:0008210;GO:0008585;GO:0009791;GO:0014065;GO:0031529;GO:0033327;GO:0035264;GO:0045184;GO:0048008;GO:0048705;GO:0050853;GO:0051898;GO:0060021;GO:0060325;GO:0070301;	GO:0005634;GO:0005654;GO:0005737;GO:0005737;GO:0005829;GO:0005886;GO:0016020;GO:0032587;GO:0005634;GO:0005654;GO:0005737;GO:0005737;GO:0005829;GO:0005886;GO:0016020;GO:0032587;
ENSMUSG00000040441	3600	44.2821	10.122	-2.12059	0.00401255	0.0406063	Down	Slc26a10	216441	solute carrier family 26, member 10	F8WGV3	K14707 SLC26A10; solute carrier family 26, member 10	NA	GO:0008271;GO:0015106;GO:0015108;GO:0015116;GO:0015297;GO:0015301;GO:0019531;	GO:0008272;GO:0055085;	GO:0005887;GO:0016020;GO:0016021;GO:0016323;
ENSMUSG00000040483	2597	257.427	149.104	-0.79166	0.000733953	0.0101688	Down	Xaf1	327959	XIAP associated factor 1	Q5NBU8	NA	NA	GO:0046872;	GO:0006915;GO:0031333;GO:0035456;	GO:0005634;GO:0005737;GO:0005739;
ENSMUSG00000040618	4625	809.352	2373.44	1.55192	1.01094e-30	3.9177e-28	Up	Pck2	74551	phosphoenolpyruvate carboxykinase 2 (mitochondrial)	Q8BH04	K01596 E4.1.1.32; phosphoenolpyruvate carboxykinase (GTP) [EC:4.1.1.32]	mmu00010:Glycolysis / Gluconeogenesis;mmu00020:Citrate cycle (TCA cycle);mmu00620:Pyruvate metabolism;mmu01100:Metabolic pathways;mmu03320:PPAR signaling pathway;mmu04068:FoxO signaling pathway;mmu04151:PI3K-Akt signaling pathway;mmu04152:AMPK signaling pathway;mmu04910:Insulin signaling pathway;mmu04920:Adipocytokine signaling pathway;mmu04922:Glucagon signaling pathway;mmu04931:Insulin resistan…	GO:0000166;GO:0004611;GO:0004613;GO:0004613;GO:0005525;GO:0016829;GO:0016831;GO:0017076;GO:0030145;GO:0046872;GO:0000166;GO:0004611;GO:0004613;GO:0004613;GO:0005525;GO:0016829;GO:0016831;GO:0017076;GO:0030145;GO:0046872;	GO:0006090;GO:0006090;GO:0006094;GO:0006094;GO:0006107;GO:0006116;GO:0019543;GO:0032024;GO:0032869;GO:0033993;GO:0042594;GO:0046327;GO:0070365;GO:0071333;GO:0071549;GO:0006090;GO:0006090;GO:0006094;GO:0006094;GO:0006107;GO:0006116;GO:0019543;GO:0032024;GO:0032869;GO:0033993;GO:0042594;GO:0046327;GO:0070365;GO:0071333;GO:0071549;	GO:0005739;GO:0005739;GO:0005739;GO:0005829;GO:0005739;GO:0005739;GO:0005739;GO:0005829;
ENSMUSG00000040621	1928	232.269	124.027	-0.903698	0.00290152	0.0310816	Down	Gemin8	237221	gem nuclear organelle associated protein 8	B1AVP5	K13136 GEMIN8; gem associated protein 8	mmu03013:RNA transport;	NA	GO:0000387;GO:0000387;GO:0006397;GO:0008380;GO:0000387;GO:0000387;GO:0006397;GO:0008380;	GO:0005634;GO:0005737;GO:0005829;GO:0032797;GO:0032797;GO:0034719;GO:0034719;GO:0005634;GO:0005737;GO:0005829;GO:0032797;GO:0032797;GO:0034719;GO:0034719;
ENSMUSG00000040675	3687	764.098	1437.46	0.911493	1.99362e-22	4.04122e-20	Up	Mthfd1l	270685	methylenetetrahydrofolate dehydrogenase (NADP+ dependent) 1-like	Q3V3R1	K13402 MTHFD1L; monofunctional C1-tetrahydrofolate synthase, mitochondrial [EC:6.3.4.3]	mmu00670:One carbon pool by folate;mmu01100:Metabolic pathways;	GO:0000166;GO:0004329;GO:0004329;GO:0004488;GO:0005524;GO:0016874;GO:0042803;	GO:0001843;GO:0006730;GO:0006760;GO:0009113;GO:0009257;GO:0009257;GO:0015942;GO:0048702;GO:0048703;GO:0055114;	GO:0005737;GO:0005739;GO:0005739;GO:0005739;GO:0005739;
ENSMUSG00000040929	9146	590.5	393.069	-0.58616	0.00114856	0.0146927	Down	Rfx3	19726	regulatory factor X, 3 (influences HLA class II expression)	G5E890	K09173 RFX1_2_3; regulatory factor X 1/2/3	NA	GO:0000978;GO:0003677;GO:0003700;GO:0003700;GO:0005515;GO:0043565;GO:0044212;GO:0044212;GO:0000978;GO:0003677;GO:0003700;GO:0003700;GO:0005515;GO:0043565;GO:0044212;GO:0044212;	GO:0006351;GO:0006355;GO:0006357;GO:0007275;GO:0007368;GO:0030154;GO:0031018;GO:0045892;GO:0045893;GO:0045893;GO:0045944;GO:0048469;GO:0050796;GO:0060271;GO:0060285;GO:0060287;GO:0072560;GO:2000078;GO:0006351;GO:0006355;GO:0006357;GO:0007275;GO:0007368;GO:0030154;GO:0031018;GO:0045892;GO:0045893;GO:0045893;GO:0045944;GO:0048469;GO:0050796;GO:0060271;GO:0060285;GO:0060287;GO:0072560;GO:2000078;	GO:0000790;GO:0000790;GO:0005634;GO:0005667;GO:0000790;GO:0000790;GO:0005634;GO:0005667;
ENSMUSG00000040938	1938	190.652	305.865	0.68063	0.000197881	0.00342897	Up	Slc16a11	216867	solute carrier family 16 (monocarboxylic acid transporters), member 11	Q9JJC0	K08188 SLC16A11; MFS transporter, MCT family, solute carrier family 16 (monocarboxylic acid transporters), member 11	NA	GO:0008028;GO:0015293;GO:0050833;GO:0008028;GO:0015293;GO:0050833;	GO:0006629;GO:0015718;GO:0055085;GO:0006629;GO:0015718;GO:0055085;	GO:0005783;GO:0005789;GO:0005886;GO:0005887;GO:0016020;GO:0016021;GO:0005783;GO:0005789;GO:0005886;GO:0005887;GO:0016020;GO:0016021;
ENSMUSG00000041220	5951	2943.68	6034.08	1.03573	1.14361e-26	3.20601e-24	Up	Elovl6	170439	ELOVL family member 6, elongation of long chain fatty acids (yeast)	Q920L5	K10203 ELOVL6; elongation of very long chain fatty acids protein 6 [EC:2.3.1.199]	mmu00062:Fatty acid elongation;mmu01040:Biosynthesis of unsaturated fatty acids;mmu01100:Metabolic pathways;mmu01212:Fatty acid metabolism;	GO:0009922;GO:0009922;GO:0016740;GO:0016747;GO:0102336;GO:0102337;GO:0102338;	GO:0006629;GO:0006631;GO:0006633;GO:0019367;GO:0019367;GO:0030148;GO:0030497;GO:0034625;GO:0034626;GO:0042759;GO:0042761;GO:0120162;	GO:0005783;GO:0016020;GO:0016021;GO:0030176;GO:0030176;
ENSMUSG00000041313	7179	1145.01	2132.45	0.896986	4.6504e-17	5.78053e-15	Up	Slc7a1	11987	solute carrier family 7 (cationic amino acid transporter, y+ system), member 1	Q3UGD6	K13863 SLC7A1; solute carrier family 7 (cationic amino acid transporter), member 1	mmu05206:MicroRNAs in cancer;	GO:0000064;GO:0015181;GO:0015181;GO:0015181;GO:0015189;GO:0022857;GO:0000064;GO:0015181;GO:0015181;GO:0015181;GO:0015189;GO:0022857;GO:0000064;GO:0015181;GO:0015181;GO:0015181;GO:0015189;GO:0022857;	GO:0006865;GO:0015809;GO:0015809;GO:0032006;GO:0055085;GO:0097638;GO:1903352;GO:0006865;GO:0015809;GO:0015809;GO:0032006;GO:0055085;GO:0097638;GO:1903352;GO:0006865;GO:0015809;GO:0015809;GO:0032006;GO:0055085;GO:0097638;GO:1903352;	GO:0005886;GO:0016020;GO:0016021;GO:0032991;GO:0005886;GO:0016020;GO:0016021;GO:0032991;GO:0005886;GO:0016020;GO:0016021;GO:0032991;
ENSMUSG00000041347	1338	234.021	115.218	-1.026	1.40853e-05	0.000346894	Down	Bdkrb1	12061	bradykinin receptor, beta 1	Q61125	K03915 BDKRB1; bradykinin receptor B1	mmu04020:Calcium signaling pathway;mmu04080:Neuroactive ligand-receptor interaction;mmu04610:Complement and coagulation cascades;mmu04750:Inflammatory mediator regulation of TRP channels;mmu04810:Regulation of actin cytoskeleton;mmu05200:Pathways in cancer;	GO:0004930;GO:0004947;GO:0004947;GO:0042277;GO:0042277;GO:0004930;GO:0004947;GO:0004947;GO:0042277;GO:0042277;	GO:0001933;GO:0002687;GO:0006954;GO:0006954;GO:0007165;GO:0007186;GO:0007205;GO:0007205;GO:0009612;GO:0016477;GO:0019233;GO:0030308;GO:0032496;GO:0045776;GO:0051281;GO:0001933;GO:0002687;GO:0006954;GO:0006954;GO:0007165;GO:0007186;GO:0007205;GO:0007205;GO:0009612;GO:0016477;GO:0019233;GO:0030308;GO:0032496;GO:0045776;GO:0051281;	GO:0005886;GO:0005886;GO:0016020;GO:0016021;GO:0043005;GO:0005886;GO:0005886;GO:0016020;GO:0016021;GO:0043005;
ENSMUSG00000041498	8943	208.814	132.489	-0.654184	0.00298317	0.031827	Down	Kif14	381293	kinesin family member 14	L0N7N1	K17915 KIF14; kinesin family member 14	NA	GO:0000166;GO:0003777;GO:0005524;GO:0008017;GO:0008017;GO:0008574;GO:0015631;GO:0016887;GO:0016887;GO:0019901;GO:0030165;	GO:0001558;GO:0007018;GO:0007080;GO:0008284;GO:0010389;GO:0021685;GO:0021693;GO:0021695;GO:0021766;GO:0021772;GO:0021846;GO:0021987;GO:0030155;GO:0030334;GO:0031146;GO:0031641;GO:0032147;GO:0032467;GO:0032487;GO:0033624;GO:0034446;GO:0043066;GO:0043161;GO:0043523;GO:0043524;GO:0045184;GO:0051301;GO:1903429;GO:2000045;	GO:0005634;GO:0005737;GO:0005829;GO:0005856;GO:0005871;GO:0005874;GO:0005874;GO:0005886;GO:0030496;GO:0051233;GO:0090543;
ENSMUSG00000041797	6384	143.97	283.903	0.981107	3.03429e-06	8.63494e-05	Up	Abca9	217262	ATP-binding cassette, sub-family A (ABC1), member 9	Q8K449	K05651 ABCA9; ATP-binding cassette, subfamily A (ABC1), member 9	mmu02010:ABC transporters;	GO:0000166;GO:0005319;GO:0005524;GO:0016887;GO:0042626;	GO:0006869;	GO:0005739;GO:0016020;GO:0016021;GO:0043231;
ENSMUSG00000041828	5619	37.6502	86.2605	1.19657	0.00028225	0.00460833	Up	Abca8a	217258	ATP-binding cassette, sub-family A (ABC1), member 8a	Q8K442	K05650 ABCA8; ATP-binding cassette, subfamily A (ABC1), member 8	mmu02010:ABC transporters;	GO:0000166;GO:0005319;GO:0005524;GO:0016887;GO:0042626;GO:0000166;GO:0005319;GO:0005524;GO:0016887;GO:0042626;GO:0000166;GO:0005319;GO:0005524;GO:0016887;GO:0042626;	GO:0006869;GO:0006869;GO:0006869;	GO:0005886;GO:0016020;GO:0016021;GO:0043231;GO:0005886;GO:0016020;GO:0016021;GO:0043231;GO:0005886;GO:0016020;GO:0016021;GO:0043231;
ENSMUSG00000041859	3431	674.287	386.159	-0.802862	3.02937e-09	1.55918e-07	Down	Mcm3	17215	minichromosome maintenance complex component 3	Q3UI57	K02541 MCM3; DNA replication licensing factor MCM3 [EC:3.6.4.12]	mmu03030:DNA replication;mmu04110:Cell cycle;	GO:0000166;GO:0003677;GO:0003688;GO:0003697;GO:0004386;GO:0005524;GO:0016787;GO:0000166;GO:0003677;GO:0003688;GO:0003697;GO:0004386;GO:0005524;GO:0016787;	GO:0000727;GO:0006260;GO:0006267;GO:0006270;GO:0006271;GO:0007049;GO:1902975;GO:0000727;GO:0006260;GO:0006267;GO:0006270;GO:0006271;GO:0007049;GO:1902975;	GO:0005634;GO:0005634;GO:0005634;GO:0005654;GO:0005737;GO:0005813;GO:0042555;GO:0042555;GO:0048471;GO:0005634;GO:0005634;GO:0005634;GO:0005654;GO:0005737;GO:0005813;GO:0042555;GO:0042555;GO:0048471;
ENSMUSG00000041920	4219	26.5902	81.8147	1.61768	0.00187192	0.0222603	Up	Slc16a6	104681	solute carrier family 16 (monocarboxylic acid transporters), member 6	B1AT66	K08183 SLC16A6; MFS transporter, MCT family, solute carrier family 16 (monocarboxylic acid transporters), member 6	NA	GO:0008028;GO:0015293;	GO:0015718;GO:0055085;	GO:0005886;GO:0005887;GO:0016020;GO:0016021;
ENSMUSG00000041939	2380	1009.84	1626.38	0.687193	1.19702e-07	4.6801e-06	Up	Mvk	17855	mevalonate kinase	Q9R008	K00869 E2.7.1.36; mevalonate kinase [EC:2.7.1.36]	mmu00900:Terpenoid backbone biosynthesis;mmu01100:Metabolic pathways;mmu04146:Peroxisome;	GO:0000166;GO:0000287;GO:0003729;GO:0004496;GO:0004496;GO:0004496;GO:0005524;GO:0016301;GO:0016740;GO:0042802;GO:0046872;GO:1990825;GO:0000166;GO:0000287;GO:0003729;GO:0004496;GO:0004496;GO:0004496;GO:0005524;GO:0016301;GO:0016740;GO:0042802;GO:0046872;GO:1990825;	GO:0006629;GO:0006694;GO:0006695;GO:0006695;GO:0008202;GO:0008203;GO:0008299;GO:0016126;GO:0017148;GO:0019287;GO:0019287;GO:0050728;GO:0006629;GO:0006694;GO:0006695;GO:0006695;GO:0008202;GO:0008203;GO:0008299;GO:0016126;GO:0017148;GO:0019287;GO:0019287;GO:0050728;	GO:0005737;GO:0005777;GO:0005829;GO:0005829;GO:0005737;GO:0005777;GO:0005829;GO:0005829;
ENSMUSG00000042029	4684	613.639	374.606	-0.711504	4.69375e-06	0.000128309	Down	Ncapg2	76044	non-SMC condensin II complex, subunit G2	Q6DFV1	K11492 NCAPG2; condensin-2 complex subunit G2	NA	GO:0005515;GO:0035064;GO:0043425;GO:0098772;GO:0005515;GO:0035064;GO:0043425;GO:0098772;GO:0005515;GO:0035064;GO:0043425;GO:0098772;	GO:0001833;GO:0006366;GO:0006366;GO:0007049;GO:0030218;GO:0030218;GO:0030261;GO:0045647;GO:0045647;GO:0045647;GO:0051301;GO:0061098;GO:0061098;GO:0061098;GO:2000273;GO:2000273;GO:0001833;GO:0006366;GO:0006366;GO:0007049;GO:0030218;GO:0030218;GO:0030261;GO:0045647;GO:0045647;GO:0045647;GO:0051301;GO:0061098;GO:0061098;GO:0061098;GO:2000273;GO:2000273;GO:0001833;GO:0006366;GO:0006366;GO:0007049;GO:…	GO:0000796;GO:0000796;GO:0005634;GO:0016607;GO:0000796;GO:0000796;GO:0005634;GO:0016607;GO:0000796;GO:0000796;GO:0005634;GO:0016607;
ENSMUSG00000042097	3158	56.4221	141.767	1.32664	0.00272861	0.0296988	Up	Zfp239	22685	zinc finger protein 239	P24399	NA	NA	GO:0000978;GO:0000981;GO:0001227;GO:0003676;GO:0003677;GO:0046872;	GO:0000122;GO:0006357;	GO:0005634;
ENSMUSG00000042099	2652	135.4	210.495	0.635657	0.00222898	0.0253618	Up	Kank3	80880	KN motif and ankyrin repeat domains 3	Q9Z1P7	K22808 KANK; KN motif and ankyrin repeat domain-containing protein	NA	GO:0003674;	GO:0030837;GO:0051497;	GO:0005737;GO:0005737;
ENSMUSG00000042451	2320	25293.1	15424.8	-0.713447	1.77977e-31	7.10613e-29	Down	Mybph	53311	myosin binding protein H	P70402	NA	NA	NA	GO:0007155;	GO:0032982;
ENSMUSG00000042489	5027	225.405	101.658	-1.14732	3.13687e-07	1.13237e-05	Down	Clspn	269582	claspin	Q80YR7	NA	NA	GO:0000217;GO:0003677;GO:0010997;GO:0010997;	GO:0000076;GO:0000077;GO:0006281;GO:0006974;GO:0007049;GO:0007095;GO:0007095;GO:0018105;GO:0032147;GO:0032147;GO:0033314;GO:0033314;	GO:0005634;GO:0005654;GO:0005694;GO:0005794;
ENSMUSG00000042793	6675	117.405	312.886	1.41538	1.98191e-13	1.71801e-11	Up	Lgr6	329252	leucine-rich repeat-containing G protein-coupled receptor 6	Q3UVD5	K08399 LGR6; leucine-rich repeat-containing G protein-coupled receptor 6	mmu04310:Wnt signaling pathway;	GO:0003674;GO:0004930;GO:0016500;	GO:0007165;GO:0007186;GO:0016055;GO:0030177;GO:0030335;GO:0042246;GO:1990523;	GO:0005615;GO:0005886;GO:0016020;GO:0016021;GO:0031012;GO:0031982;
ENSMUSG00000042807	11263	1457.51	968.152	-0.589694	3.23337e-08	1.37873e-06	Down	Hecw2	329152	HECT, C2 and WW domain containing E3 ubiquitin protein ligase 2	A3KPB7	K12168 HECW2; E3 ubiquitin-protein ligase HECW2 [EC:2.3.2.26]	NA	GO:0004842;GO:0016740;GO:0061630;GO:0004842;GO:0016740;GO:0061630;	GO:0000209;GO:0006511;GO:0016567;GO:0030071;GO:0043161;GO:0045732;GO:0048814;GO:2000650;GO:0000209;GO:0006511;GO:0016567;GO:0030071;GO:0043161;GO:0045732;GO:0048814;GO:2000650;	GO:0005737;GO:0005856;GO:0072686;GO:0005737;GO:0005856;GO:0072686;
ENSMUSG00000043613	1801	2874.82	596.671	-2.26891	6.74288e-70	2.96147e-66	Down	Mmp3	17392	matrix metallopeptidase 3	Q922W6	K01394 MMP3; matrix metalloproteinase-3 (stromelysin 1, progelatinase) [EC:3.4.24.17]	mmu04657:IL-17 signaling pathway;mmu04668:TNF signaling pathway;mmu05202:Transcriptional misregulation in cancer;mmu05215:Prostate cancer;mmu05323:Rheumatoid arthritis;	GO:0004175;GO:0004222;GO:0008233;GO:0008237;GO:0008270;GO:0016787;GO:0044877;GO:0046872;GO:0004175;GO:0004222;GO:0008233;GO:0008237;GO:0008270;GO:0016787;GO:0044877;GO:0046872;GO:0004175;GO:0004222;GO:0008233;GO:0008237;GO:0008270;GO:0016787;GO:0044877;GO:0046872;	GO:0006508;GO:0006508;GO:0010727;GO:0030163;GO:0030198;GO:0030334;GO:0030335;GO:0030574;GO:0032461;GO:0051898;GO:0071230;GO:1903209;GO:0006508;GO:0006508;GO:0010727;GO:0030163;GO:0030198;GO:0030334;GO:0030335;GO:0030574;GO:0032461;GO:0051898;GO:0071230;GO:1903209;GO:0006508;GO:0006508;GO:0010727;GO:0030163;GO:0030198;GO:0030334;GO:0030335;GO:0030574;GO:0032461;GO:0051898;GO:0071230;GO:1903209;	GO:0005576;GO:0005615;GO:0005615;GO:0005615;GO:0005634;GO:0005739;GO:0005829;GO:0030425;GO:0031012;GO:0032991;GO:0044297;GO:0005576;GO:0005615;GO:0005615;GO:0005615;GO:0005634;GO:0005739;GO:0005829;GO:0030425;GO:0031012;GO:0032991;GO:0044297;GO:0005576;GO:0005615;GO:0005615;GO:0005615;GO:0005634;GO:0005739;GO:0005829;GO:0030425;GO:0031012;GO:0032991;GO:0044297;
ENSMUSG00000044254	3521	302.73	619.207	1.03204	4.90842e-12	3.82682e-10	Up	Pcsk9	100102	proprotein convertase subtilisin/kexin type 9	Q80W65	K13050 PCSK9; proprotein convertase subtilisin/kexin type 9 [EC:3.4.21.-]	mmu04979:Cholesterol metabolism;	GO:0004252;GO:0004252;GO:0004252;GO:0008233;GO:0008236;GO:0016787;GO:0019871;GO:0030169;GO:0030547;GO:0034185;GO:0034189;GO:0034190;GO:0043621;GO:0050750;GO:0050750;GO:0070326;	GO:0001822;GO:0001889;GO:0001920;GO:0002092;GO:0006508;GO:0006629;GO:0006641;GO:0006644;GO:0006915;GO:0007041;GO:0008202;GO:0008203;GO:0009267;GO:0009267;GO:0010469;GO:0010989;GO:0016485;GO:0016540;GO:0016540;GO:0022008;GO:0030182;GO:0030182;GO:0032799;GO:0032802;GO:0032802;GO:0032803;GO:0032805;GO:0032869;GO:0032869;GO:0042157;GO:0042632;GO:0042632;GO:0043523;GO:0043525;GO:0043525;GO:1905596;GO:…	GO:0005576;GO:0005615;GO:0005615;GO:0005615;GO:0005615;GO:0005737;GO:0005764;GO:0005768;GO:0005769;GO:0005770;GO:0005783;GO:0005783;GO:0005791;GO:0005794;GO:0005886;GO:0009986;GO:0030134;GO:0048471;GO:1990666;GO:1990667;
ENSMUSG00000044288	5807	300.918	166.727	-0.851076	1.04213e-06	3.31811e-05	Down	Cnr1	12801	cannabinoid receptor 1 (brain)	P47746	K04277 CNR1; cannabinoid receptor 1	mmu04015:Rap1 signaling pathway;mmu04080:Neuroactive ligand-receptor interaction;mmu04714:Thermogenesis;mmu04723:Retrograde endocannabinoid signaling;	GO:0004930;GO:0004949;GO:0004949;GO:0008144;GO:0099635;GO:0099635;	GO:0002866;GO:0007165;GO:0007186;GO:0007188;GO:0007413;GO:0007568;GO:0007611;GO:0007613;GO:0010976;GO:0019216;GO:0019233;GO:0031622;GO:0031999;GO:0032228;GO:0032496;GO:0033004;GO:0033602;GO:0035094;GO:0038171;GO:0038171;GO:0042220;GO:0042593;GO:0043065;GO:0043271;GO:0043278;GO:0045471;GO:0045759;GO:0045776;GO:0045777;GO:0050796;GO:0051001;GO:0051966;GO:0060259;GO:0060405;GO:0070588;GO:0098921;GO:…	GO:0005739;GO:0005741;GO:0005886;GO:0016020;GO:0016021;GO:0030424;GO:0030426;GO:0032592;GO:0042734;GO:0042995;GO:0043231;GO:0045121;GO:0098793;GO:0098978;GO:0098978;GO:0098982;GO:0098982;GO:0098982;GO:0099056;GO:0099056;
ENSMUSG00000044857	2808	1260.89	2010.47	0.673425	2.05672e-05	0.000483054	Up	Lemd2	224640	LEM domain containing 2	Q6DVA0	NA	NA	NA	GO:0006998;GO:0006998;GO:0022008;GO:0030514;GO:0035914;GO:0035914;GO:0043409;GO:0051898;GO:0060914;GO:0071168;GO:1902531;	GO:0000785;GO:0005634;GO:0005635;GO:0005637;GO:0005639;GO:0005639;GO:0005783;GO:0016020;GO:0016021;GO:0031965;GO:0031965;
ENSMUSG00000045294	2697	3666.99	8617.33	1.23255	5.01649e-57	6.60973e-54	Up	Insig1	231070	insulin induced gene 1	Q8BGI3	NA	NA	GO:0005515;	GO:0006629;GO:0006641;GO:0006695;GO:0006991;GO:0008202;GO:0008203;GO:0010894;GO:0016126;GO:0032933;GO:0036315;GO:0036316;GO:0042472;GO:0042474;GO:0042632;GO:0045599;GO:0045717;GO:0060021;GO:0060363;GO:0070862;GO:1901303;	GO:0005783;GO:0005783;GO:0016020;GO:0016021;GO:0032937;
ENSMUSG00000045411	4201	801.03	408.63	-0.97111	4.64714e-10	2.82169e-08	Down	2410002F23Rik	668661	RIKEN cDNA 2410002F23 gene	Q9CWW9	NA	NA	NA	NA	NA
ENSMUSG00000045659	6059	631.362	384.055	-0.716955	1.02829e-07	4.05652e-06	Down	Plekha7	233765	pleckstrin homology domain containing, family A member 7	Q3UIL6	NA	NA	GO:0005515;GO:0070097;	GO:0044331;GO:0045218;GO:0090136;	GO:0005634;GO:0005737;GO:0005813;GO:0005829;GO:0005856;GO:0005911;GO:0005915;GO:0030054;
ENSMUSG00000045776	7321	50.5495	17.782	-1.5151	0.0007543	0.0103636	Down	Lrtm1	319476	leucine-rich repeats and transmembrane domains 1	Q8BXQ3	NA	NA	GO:0008201;GO:0048495;GO:0008201;GO:0048495;	GO:0007411;GO:0050919;GO:0051965;GO:0007411;GO:0050919;GO:0051965;	GO:0005615;GO:0016020;GO:0016021;GO:0005615;GO:0016020;GO:0016021;
ENSMUSG00000045868	9005	1152.68	724.075	-0.670314	1.67744e-06	5.10437e-05	Down	Gvin1	74558	GTPase, very large interferon inducible 1	L7N451	NA	NA	GO:0003674;	GO:0008150;	GO:0005575;
ENSMUSG00000046027	2832	167.919	263.028	0.646668	0.000610312	0.00878849	Up	Stard5	170460	StAR-related lipid transfer (START) domain containing 5	Q9EPQ7	NA	NA	GO:0008289;GO:0015485;GO:0015485;GO:0017127;GO:0032052;	GO:0006869;GO:0070508;	NA
ENSMUSG00000046179	3691	776.998	463.255	-0.744862	1.4185e-07	5.48097e-06	Down	E2f8	108961	E2F transcription factor 8	Q58FA4	K09391 E2F7_8; transcription factor E2F7/8	NA	GO:0000978;GO:0000981;GO:0000987;GO:0001227;GO:0003677;GO:0003677;GO:0003700;GO:0003700;GO:0003700;GO:0003714;GO:0008134;GO:0042802;GO:0042803;GO:0043565;	GO:0000122;GO:0000122;GO:0000122;GO:0001890;GO:0002040;GO:0002040;GO:0006355;GO:0007049;GO:0008283;GO:0032466;GO:0032877;GO:0033301;GO:0045944;GO:0045944;GO:0051726;GO:0060707;GO:0060718;GO:0070365;	GO:0005634;GO:0005634;GO:0005634;GO:0005667;GO:0005730;GO:0005829;GO:0090575;
ENSMUSG00000046318	6572	1764.95	895.335	-0.978128	2.16242e-20	3.74895e-18	Down	Ccbe1	320924	collagen and calcium binding EGF domains 1	Q3MI99	K19638 CCBE1; collagen and calcium-binding EGF domain-containing protein 1	NA	GO:0002020;GO:0005509;GO:0005518;	GO:0001525;GO:0001945;GO:0001946;GO:0001946;GO:0003016;GO:0007275;GO:0007585;GO:0010575;GO:0010595;GO:0010954;GO:0030324;GO:0045766;GO:1900748;GO:1901492;	GO:0005576;GO:0005581;GO:0005615;GO:0031012;
ENSMUSG00000046329	3362	93.0327	158.83	0.771328	0.00223942	0.0254587	Up	Slc25a23	66972	solute carrier family 25 (mitochondrial carrier; phosphate carrier), member 23	Q9D908	K14684 SLC25A23S; solute carrier family 25 (mitochondrial phosphate transporter), member 23/24/25/41	NA	GO:0005347;GO:0005509;GO:0022857;GO:0046872;GO:0005347;GO:0005509;GO:0022857;GO:0046872;	GO:0002082;GO:0006851;GO:0036444;GO:0043457;GO:0051282;GO:0051503;GO:0051561;GO:0055085;GO:0071277;GO:0097274;GO:1900069;GO:0002082;GO:0006851;GO:0036444;GO:0043457;GO:0051282;GO:0051503;GO:0051561;GO:0055085;GO:0071277;GO:0097274;GO:1900069;	GO:0005739;GO:0005739;GO:0005739;GO:0005743;GO:0016020;GO:0016021;GO:0005739;GO:0005739;GO:0005739;GO:0005743;GO:0016020;GO:0016021;
ENSMUSG00000046618	5579	92.3429	160.284	0.797418	0.00156503	0.0191821	Up	Olfml2a	241327	olfactomedin-like 2A	Q8BHP7	NA	NA	GO:0042803;GO:0050840;GO:0042803;GO:0050840;	GO:0030198;GO:0030198;	GO:0005576;GO:0031012;GO:0005576;GO:0031012;
ENSMUSG00000046897	4241	834.774	2389.38	1.51722	0.00272918	0.0296988	Up	Zfp740	68744	zinc finger protein 740	D3Z4S9	NA	NA	GO:0003676;GO:0003700;GO:0044212;GO:0046872;GO:0003676;GO:0003700;GO:0044212;GO:0046872;	GO:0045944;GO:0045944;	GO:0005634;GO:0005654;GO:0005634;GO:0005654;
ENSMUSG00000047230	3044	28.5569	7.54469	-1.9264	0.00463681	0.0453495	Down	Cldn2	12738	claudin 2	O88552	K06087 CLDN; claudin	mmu04514:Cell adhesion molecules (CAMs);mmu04530:Tight junction;mmu04670:Leukocyte transendothelial migration;mmu05160:Hepatitis C;	GO:0005198;GO:0005515;GO:0042802;	GO:0016338;	GO:0005886;GO:0005923;GO:0016020;GO:0016021;GO:0030054;
ENSMUSG00000047534	5016	293.592	194.757	-0.589824	0.00280093	0.0302006	Down	Mis18bp1	217653	MIS18 binding protein 1	Q80WQ8	NA	NA	GO:0003677;GO:0005515;	GO:0007049;GO:0051301;	GO:0000775;GO:0000778;GO:0005634;GO:0005694;
ENSMUSG00000047562	1722	252.692	50.0649	-2.32803	1.59118e-19	2.52596e-17	Down	Mmp10	17384	matrix metallopeptidase 10	O55123	K01396 MMP10; matrix metalloproteinase-10 (stromelysin 2) [EC:3.4.24.22]	NA	GO:0004222;GO:0008233;GO:0008237;GO:0008270;GO:0016787;GO:0046872;GO:0004222;GO:0008233;GO:0008237;GO:0008270;GO:0016787;GO:0046872;	GO:0006508;GO:0030198;GO:0030334;GO:0030574;GO:0006508;GO:0030198;GO:0030334;GO:0030574;	GO:0005576;GO:0005615;GO:0031012;GO:0005576;GO:0005615;GO:0031012;
ENSMUSG00000047632	1772	24.1625	70.9733	1.55296	0.000538033	0.00789435	Up	Fgfbp3	72514	fibroblast growth factor binding protein 3	Q1HCM0	NA	NA	GO:0008201;GO:0017134;GO:0017134;GO:0019838;GO:0008201;GO:0017134;GO:0017134;GO:0019838;	GO:0007267;GO:0030534;GO:0031646;GO:0043117;GO:0045743;GO:0070374;GO:0007267;GO:0030534;GO:0031646;GO:0043117;GO:0045743;GO:0070374;	GO:0005576;GO:0005576;
ENSMUSG00000048368	2249	71.0762	139.377	0.972981	0.00101751	0.0133268	Up	Omd	27047	osteomodulin	O35103	K08124 OMD; osteomodulin	NA	NA	GO:0007155;GO:0030500;	GO:0005576;GO:0031012;GO:0062023;
ENSMUSG00000048373	2191	88.299	24.5921	-1.84966	1.12343e-05	0.000280346	Down	Fgfbp1	14181	fibroblast growth factor binding protein 1	O70514	NA	NA	GO:0017134;GO:0019838;	GO:0007267;GO:0007267;GO:0008284;GO:0045743;GO:0090050;GO:1903589;	GO:0005576;GO:0005886;GO:0009986;GO:0016020;
ENSMUSG00000048442	1113	97.231	27.1144	-1.84666	0.000667459	0.00940582	Down	Smim5	66528	small integral membrane protein 5	Q8BT42	NA	NA	GO:0003674;	GO:0008150;	GO:0016020;GO:0016021;
ENSMUSG00000048489	1339	194.932	303.785	0.64092	0.000248354	0.00413693	Up	Depp1	213393	DEPP1 autophagy regulator	Q8K2F3	NA	NA	GO:0003674;	GO:0006914;GO:0010506;	GO:0005737;GO:0005739;GO:0005739;GO:0005777;
ENSMUSG00000048782	2321	1736.08	1094.72	-0.665082	1.3226e-09	7.35298e-08	Down	Insc	233752	INSC spindle orientation adaptor protein	Q3HNM7	NA	NA	GO:0019904;GO:0030674;GO:0019904;GO:0030674;	GO:0000132;GO:0007275;GO:0007399;GO:0008356;GO:0030154;GO:0031647;GO:0060487;GO:0000132;GO:0007275;GO:0007399;GO:0008356;GO:0030154;GO:0031647;GO:0060487;	GO:0005737;GO:0005886;GO:0005938;GO:0032991;GO:0045177;GO:0005737;GO:0005886;GO:0005938;GO:0032991;GO:0045177;
ENSMUSG00000049036	1574	192.848	290.332	0.589695	0.000770136	0.0105263	Up	Tmem121	69195	transmembrane protein 121	Q80XA0	NA	NA	GO:0003674;	GO:0008150;	GO:0005575;GO:0016020;GO:0016021;
ENSMUSG00000049555	2802	139.293	77.7873	-0.836931	0.00176239	0.0211486	Down	Tmie	20776	transmembrane inner ear	Q8K467	K23907 TMIE; transmembrane inner ear expressed protein	NA	GO:0005515;GO:0005515;	GO:0007605;GO:0007605;GO:0042472;GO:0042472;GO:0007605;GO:0007605;GO:0042472;GO:0042472;	GO:0016020;GO:0016021;GO:0016020;GO:0016021;
ENSMUSG00000049580	2760	664.385	359.713	-0.884445	0.00023766	0.00399924	Down	Tsku	244152	tsukushi, small leucine rich proteoglycan	Q8CBR6	K08130 TSK; tsukushi (leucine-rich repeat-containing protein 54)	NA	GO:0005515;GO:0005515;	GO:0010468;GO:0021540;GO:0021670;GO:0021960;GO:0030178;GO:0043010;GO:0061073;GO:0010468;GO:0021540;GO:0021670;GO:0021960;GO:0030178;GO:0043010;GO:0061073;	GO:0005576;GO:0005615;GO:0005615;GO:0031012;GO:0005576;GO:0005615;GO:0005615;GO:0031012;
ENSMUSG00000049723	4474	64.8756	5.06522	-3.63107	5.73971e-07	1.96432e-05	Down	Mmp12	17381	matrix metallopeptidase 12	Q3TCW6	K01413 MMP12; matrix metalloproteinase-12 (macrophage elastase) [EC:3.4.24.65]	NA	GO:0001047;GO:0004222;GO:0004222;GO:0005509;GO:0005518;GO:0008233;GO:0008237;GO:0008270;GO:0016787;GO:0043565;GO:0046872;GO:0001047;GO:0004222;GO:0004222;GO:0005509;GO:0005518;GO:0008233;GO:0008237;GO:0008270;GO:0016787;GO:0043565;GO:0046872;	GO:0000122;GO:0006508;GO:0006606;GO:0006606;GO:0010628;GO:0030198;GO:0030574;GO:0035313;GO:0042060;GO:0045944;GO:0050691;GO:0060054;GO:0060309;GO:0060339;GO:0060340;GO:0098586;GO:1901163;GO:1902741;GO:1904905;GO:0000122;GO:0006508;GO:0006606;GO:0006606;GO:0010628;GO:0030198;GO:0030574;GO:0035313;GO:0042060;GO:0045944;GO:0050691;GO:0060054;GO:0060309;GO:0060339;GO:0060340;GO:0098586;GO:1901163;GO:…	GO:0005576;GO:0005615;GO:0005615;GO:0005615;GO:0005615;GO:0005634;GO:0005634;GO:0005737;GO:0031012;GO:0005576;GO:0005615;GO:0005615;GO:0005615;GO:0005615;GO:0005634;GO:0005634;GO:0005737;GO:0031012;
ENSMUSG00000049791	6720	211.243	451.259	1.09444	3.18011e-09	1.6304e-07	Up	Fzd4	14366	frizzled class receptor 4	Q8BLL2	K02354 FZD4; frizzled 4	mmu04150:mTOR signaling pathway;mmu04310:Wnt signaling pathway;mmu04390:Hippo signaling pathway;mmu04550:Signaling pathways regulating pluripotency of stem cells;mmu04916:Melanogenesis;mmu04934:Cushing syndrome;mmu05165:Human papillomavirus infection;mmu05200:Pathways in cancer;mmu05205:Proteoglycans in cancer;mmu05217:Basal cell carcinoma;mmu05224:Breast cancer;mmu05225:Hepatocellular carcinoma;…	GO:0001540;GO:0004888;GO:0004896;GO:0004930;GO:0005515;GO:0017147;GO:0017147;GO:0017147;GO:0019955;GO:0019955;GO:0030165;GO:0031625;GO:0038023;GO:0038023;GO:0042803;GO:0042813;GO:0042813;GO:0042813;GO:0044877;GO:0046982;GO:0001540;GO:0004888;GO:0004896;GO:0004930;GO:0005515;GO:0017147;GO:0017147;GO:0017147;GO:0019955;GO:0019955;GO:0030165;GO:0031625;GO:0038023;GO:0038023;GO:0042803;GO:0042813;GO:…	GO:0001553;GO:0001568;GO:0001570;GO:0007165;GO:0007166;GO:0007186;GO:0007223;GO:0007275;GO:0007605;GO:0010812;GO:0010812;GO:0016055;GO:0016055;GO:0030947;GO:0031987;GO:0034446;GO:0035426;GO:0035567;GO:0042701;GO:0043507;GO:0045893;GO:0045893;GO:0051091;GO:0051091;GO:0060070;GO:0060070;GO:0060070;GO:0061299;GO:0061299;GO:0061299;GO:0061299;GO:0061301;GO:0061304;GO:0150012;GO:0150012;GO:1990830;GO:…	GO:0005886;GO:0005886;GO:0005886;GO:0005886;GO:0005911;GO:0009986;GO:0016020;GO:0016021;GO:0030425;GO:0045202;GO:0098978;GO:0005886;GO:0005886;GO:0005886;GO:0005886;GO:0005911;GO:0009986;GO:0016020;GO:0016021;GO:0030425;GO:0045202;GO:0098978;GO:0005886;GO:0005886;GO:0005886;GO:0005886;GO:0005911;GO:0009986;GO:0016020;GO:0016021;GO:0030425;GO:0045202;GO:0098978;GO:0005886;GO:0005886;GO:0005886;GO:…
ENSMUSG00000049957	2778	576.776	355.448	-0.699409	0.00424843	0.0424071	Down	Ccdc137	67291	coiled-coil domain containing 137	Q8R0K4	NA	NA	NA	GO:0008150;	GO:0001650;GO:0005694;GO:0005730;
ENSMUSG00000050014	2325	427.966	247.95	-0.788603	1.4453e-07	5.5682e-06	Down	Apol10b	328561	apolipoprotein L 10B	Q8BZS1	K14480 APOL; apolipoprotein L	NA	GO:0008289;GO:0008289;	GO:0008150;GO:0008150;	GO:0005575;GO:0005575;
ENSMUSG00000050069	3745	225.013	108.978	-1.04461	2.68702e-06	7.67987e-05	Down	Grem2	23893	gremlin 2, DAN family BMP antagonist	Q3TST1	K23318 GREM; gremlin	mmu04350:TGF-beta signaling pathway;	GO:0005125;GO:0008201;GO:0036122;GO:0042802;GO:0042803;GO:0005125;GO:0008201;GO:0036122;GO:0042802;GO:0042803;	GO:0007275;GO:0010172;GO:0019221;GO:0030514;GO:0038098;GO:0048263;GO:0060300;GO:0007275;GO:0010172;GO:0019221;GO:0030514;GO:0038098;GO:0048263;GO:0060300;	GO:0005576;GO:0005615;GO:0005576;GO:0005615;
ENSMUSG00000050157	1221	12.565	40.3659	1.68345	0.00210004	0.0242508	Up	Gm867	333670	predicted gene 867	A0A1W2P7T4	NA	NA	GO:0003674;	GO:0008150;	GO:0005575;
ENSMUSG00000050394	2120	284.802	433.818	0.606162	6.74096e-05	0.00135254	Up	Armcx6	278097	armadillo repeat containing, X-linked 6	Q8K3A6	NA	NA	GO:0003674;	GO:0008150;	GO:0005575;GO:0005739;GO:0005741;GO:0016020;GO:0016021;
ENSMUSG00000050410	1732	171.912	93.6925	-0.880176	0.00183954	0.0219148	Down	Tcf19	106795	transcription factor 19	Q99KJ5	NA	NA	NA	GO:0000082;GO:0010468;GO:0044342;GO:0000082;GO:0010468;GO:0044342;	GO:0005634;GO:0005634;
ENSMUSG00000050447	3620	68.4311	181.003	1.40201	3.52932e-06	9.87311e-05	Up	Lypd6	320343	LY6/PLAUR domain containing 6	Q8BPP5	NA	NA	GO:0030548;GO:0030550;	NA	GO:0005575;GO:0005576;GO:0005737;GO:0005886;GO:0016020;GO:0030054;GO:0031225;GO:0043005;GO:0045202;
ENSMUSG00000050578	2673	91.7374	34.347	-1.42102	5.7933e-05	0.00119456	Down	Mmp13	17386	matrix metallopeptidase 13	Q3U9V5	K07994 MMP13; matrix metalloproteinase-13 (collagenase 3) [EC:3.4.24.-]	mmu04657:IL-17 signaling pathway;mmu04926:Relaxin signaling pathway;mmu04928:Parathyroid hormone synthesis, secretion and action;	GO:0001968;GO:0004222;GO:0004222;GO:0004222;GO:0005509;GO:0005518;GO:0008233;GO:0008237;GO:0008270;GO:0016787;GO:0046872;GO:0048306;GO:0050750;GO:0001968;GO:0004222;GO:0004222;GO:0004222;GO:0005509;GO:0005518;GO:0008233;GO:0008237;GO:0008270;GO:0016787;GO:0046872;GO:0048306;GO:0050750;	GO:0001958;GO:0001958;GO:0003417;GO:0006508;GO:0006508;GO:0007507;GO:0009725;GO:0022617;GO:0022617;GO:0022617;GO:0030198;GO:0030282;GO:0030574;GO:0030574;GO:0030574;GO:0030574;GO:0043171;GO:0044267;GO:0051216;GO:0060349;GO:1904244;GO:0001958;GO:0001958;GO:0003417;GO:0006508;GO:0006508;GO:0007507;GO:0009725;GO:0022617;GO:0022617;GO:0022617;GO:0030198;GO:0030282;GO:0030574;GO:0030574;GO:0030574;GO:…	GO:0005576;GO:0005615;GO:0005615;GO:0005764;GO:0005794;GO:0031012;GO:0046581;GO:0005576;GO:0005615;GO:0005615;GO:0005764;GO:0005794;GO:0031012;GO:0046581;
ENSMUSG00000050592	4107	81.2386	36.2634	-1.17177	0.00419176	0.0420325	Down	Fam78a	241303	family with sequence similarity 78, member A	Q8C552	NA	NA	GO:0003674;GO:0003674;	GO:0008150;GO:0008150;	GO:0005575;GO:0005575;
ENSMUSG00000050708	968	14488.1	23426.2	0.693242	1.86298e-09	1.0019e-07	Up	Ftl1	14325	ferritin light polypeptide 1	Q9CPX4	K13625 FTL; ferritin light chain	mmu04216:Ferroptosis;mmu04217:Necroptosis;mmu04978:Mineral absorption;	GO:0004322;GO:0005506;GO:0005506;GO:0005515;GO:0008198;GO:0008199;GO:0042802;GO:0042802;	GO:0006880;	GO:0005737;GO:0005737;GO:0008043;GO:0044754;
ENSMUSG00000051235	5268	183.789	80.0975	-1.19609	3.49809e-06	9.80655e-05	Down	Gen1	209334	GEN1, Holliday junction 5' flap endonuclease	Q8BMI4	K15338 GEN1; flap endonuclease GEN [EC:3.1.-.-]	NA	GO:0000287;GO:0000400;GO:0000400;GO:0003677;GO:0003824;GO:0004518;GO:0004519;GO:0008821;GO:0008821;GO:0016787;GO:0017108;GO:0017108;GO:0035312;GO:0042803;GO:0046872;GO:0048256;	GO:0000724;GO:0000724;GO:0006281;GO:0006974;GO:0010824;GO:0031297;GO:0071139;GO:0071140;GO:0090267;	GO:0005634;GO:0005813;
ENSMUSG00000051817	4453	79.3632	142.983	0.850849	0.00111783	0.0143834	Up	Sox12	20667	SRY (sex determining region Y)-box 12	Q04890	K09268 SOX11_12; transcription factor SOX11/12 (SOX group C)	NA	GO:0000976;GO:0000981;GO:0001228;GO:0003677;GO:0003713;	GO:0006355;GO:0021510;GO:0030154;GO:0045165;GO:0045944;GO:0045944;GO:0065004;	GO:0005634;GO:0005654;GO:0032993;GO:0044798;
ENSMUSG00000051985	8989	49.2421	15.8924	-1.63203	0.00045023	0.00680301	Down	Igfn1	226438	immunoglobulin-like and fibronectin type III domain containing 1	Q3KNY0	NA	NA	GO:0003674;	GO:0008150;	GO:0005634;GO:0005737;GO:0030017;GO:0030018;
ENSMUSG00000052353	7111	1642.04	953.895	-0.783065	1.74916e-17	2.23757e-15	Down	Cemip	80982	cell migration inducing protein, hyaluronan binding	Q8BI06	K19031 CEMIP; cell migration-inducing and hyaluronan-binding protein [EC:3.2.1.35]	NA	GO:0004415;GO:0004415;GO:0005540;GO:0005540;GO:0016787;GO:0016798;GO:0032050;GO:0046923;GO:0004415;GO:0004415;GO:0005540;GO:0005540;GO:0016787;GO:0016798;GO:0032050;GO:0046923;	GO:0007605;GO:0008152;GO:0010800;GO:0030214;GO:0030214;GO:0030335;GO:0051281;GO:0090314;GO:1900020;GO:0007605;GO:0008152;GO:0010800;GO:0030214;GO:0030214;GO:0030335;GO:0051281;GO:0090314;GO:1900020;	GO:0005576;GO:0005634;GO:0005737;GO:0005737;GO:0005783;GO:0005886;GO:0005905;GO:0016020;GO:0030665;GO:0045334;GO:0005576;GO:0005634;GO:0005737;GO:0005737;GO:0005783;GO:0005886;GO:0005905;GO:0016020;GO:0030665;GO:0045334;
ENSMUSG00000052374	3013	607.088	303.268	-1.0011	4.94503e-14	4.56775e-12	Down	Actn2	11472	actinin alpha 2	Q9JI91	K21073 ACTN2_3; actinin alpha 2/3	mmu05412:Arrhythmogenic right ventricular cardiomyopathy (ARVC);	GO:0003779;GO:0005509;GO:0005515;GO:0005546;GO:0008092;GO:0008092;GO:0019904;GO:0030274;GO:0030374;GO:0030375;GO:0030674;GO:0031432;GO:0042802;GO:0042803;GO:0042803;GO:0044325;GO:0044325;GO:0046872;GO:0046983;GO:0051015;GO:0051015;GO:0051373;GO:0070080;GO:0003779;GO:0005509;GO:0005515;GO:0005546;GO:0008092;GO:0008092;GO:0019904;GO:0030274;GO:0030374;GO:0030375;GO:0030674;GO:0031432;GO:0042802;GO:…	GO:0006936;GO:0030035;GO:0042391;GO:0043267;GO:0043268;GO:0045214;GO:0048041;GO:0051289;GO:0051695;GO:0055013;GO:0072659;GO:0072659;GO:0086097;GO:1901017;GO:1901018;GO:2000009;GO:2001137;GO:2001137;GO:2001259;GO:2001259;GO:0006936;GO:0030035;GO:0042391;GO:0043267;GO:0043268;GO:0045214;GO:0048041;GO:0051289;GO:0051695;GO:0055013;GO:0072659;GO:0072659;GO:0086097;GO:1901017;GO:1901018;GO:2000009;GO:…	GO:0005737;GO:0005865;GO:0005886;GO:0005925;GO:0030017;GO:0030018;GO:0030018;GO:0030175;GO:0030864;GO:0098839;GO:0098978;GO:0099092;GO:0005737;GO:0005865;GO:0005886;GO:0005925;GO:0030017;GO:0030018;GO:0030018;GO:0030175;GO:0030864;GO:0098839;GO:0098978;GO:0099092;
ENSMUSG00000053101	3433	15.2309	80.2591	2.3939	4.31424e-08	1.81033e-06	Up	Gpr141	353346	G protein-coupled receptor 141	Q7TQP0	K08429 GPR141; G protein-coupled receptor 141	NA	GO:0004930;	GO:0007165;	GO:0005575;GO:0005886;GO:0016020;GO:0016021;
ENSMUSG00000053113	2552	1889.9	783.925	-1.26962	8.13483e-41	5.35923e-38	Down	Socs3	12702	suppressor of cytokine signaling 3	O35718	K04696 SOCS3; suppressor of cytokine signaling 3	mmu04120:Ubiquitin mediated proteolysis;mmu04380:Osteoclast differentiation;mmu04630:JAK-STAT signaling pathway;mmu04668:TNF signaling pathway;mmu04910:Insulin signaling pathway;mmu04917:Prolactin signaling pathway;mmu04920:Adipocytokine signaling pathway;mmu04930:Type II diabetes mellitus;mmu04931:Insulin resistance;mmu04932:Non-alcoholic fatty liver disease (NAFLD);mmu04935:Growth hormone synth…	GO:0001784;GO:0005515;GO:0046935;	GO:0001932;GO:0007165;GO:0007259;GO:0009968;GO:0035556;GO:0040008;GO:0042532;GO:0043066;GO:0045595;GO:0045595;GO:0045597;GO:0045597;GO:0046426;GO:0046627;GO:0046627;GO:0046854;GO:0050728;GO:0060670;GO:0060674;GO:0060707;GO:0060707;GO:0060708;GO:0060708;GO:1990830;	GO:0005737;GO:0005942;
ENSMUSG00000053175	1850	338.574	139.353	-1.27916	1.91544e-12	1.54833e-10	Down	Bcl3	12051	B cell leukemia/lymphoma 3	Q9Z2F6	K09258 BCL3; B-cell CLL/lymphoma protein 3	mmu04625:C-type lectin receptor signaling pathway;mmu04668:TNF signaling pathway;	GO:0003677;GO:0003700;GO:0005515;GO:0008134;	GO:0002268;GO:0002315;GO:0002455;GO:0002467;GO:0006351;GO:0006974;GO:0007249;GO:0009615;GO:0010225;GO:0019730;GO:0030198;GO:0030330;GO:0032729;GO:0042088;GO:0042536;GO:0042742;GO:0042771;GO:0042832;GO:0042981;GO:0043066;GO:0043066;GO:0043066;GO:0045064;GO:0045082;GO:0045415;GO:0045727;GO:0045892;GO:0045893;GO:0045944;GO:0046426;GO:0048536;	GO:0005634;GO:0005654;GO:0005737;GO:0005829;GO:0005886;GO:0030496;GO:0032991;GO:0032996;GO:0033257;GO:0043231;
ENSMUSG00000053205	12974	387.47	226.411	-0.778178	6.84306e-05	0.0013682	Down	Styx	56291	serine/threonine/tyrosine interaction protein	Q60969	K18042 STYX; serine/threonine/tyrosine-interacting protein	NA	GO:0001691;GO:0005515;GO:1990444;GO:1990444;	GO:0007283;GO:0032091;GO:0032091;GO:0043086;GO:0045204;GO:0062026;GO:0062026;GO:0070372;GO:0070372;	GO:0005634;GO:0005634;GO:0005654;GO:0005654;GO:0005737;GO:0005737;GO:0005737;
ENSMUSG00000053219	1579	338.888	566.336	0.740284	1.14161e-08	5.2964e-07	Up	Raet1e	379043	retinoic acid early transcript 1E	Q9CZQ6	K07987 RAET1; retinoic acid early transcript 1	mmu04650:Natural killer cell mediated cytotoxicity;	GO:0046703;GO:0046703;GO:0046703;GO:0046703;GO:0046703;GO:0046703;GO:0046703;GO:0046703;	GO:0001913;GO:0001913;GO:0006955;GO:0030101;GO:0042267;GO:0042271;GO:0001913;GO:0001913;GO:0006955;GO:0030101;GO:0042267;GO:0042271;	GO:0005615;GO:0005886;GO:0009897;GO:0016020;GO:0031225;GO:0044214;GO:0005615;GO:0005886;GO:0009897;GO:0016020;GO:0031225;GO:0044214;
ENSMUSG00000053279	2358	8.17065	52.2263	2.67646	1.23815e-06	3.86585e-05	Up	E030003E18Rik	320092	RIKEN cDNA E030003E18 gene	NA	NA	NA	GO:0001758;GO:0004028;GO:0004029;GO:0004029;GO:0016491;GO:0016620;GO:0018479;GO:0018479;GO:0042802;GO:0051287;	GO:0001523;GO:0002072;GO:0002138;GO:0006979;GO:0042493;GO:0042572;GO:0042573;GO:0042573;GO:0042573;GO:0042904;GO:0042905;GO:0043065;GO:0045471;GO:0048048;GO:0051289;GO:0055114;GO:0120163;	GO:0005634;GO:0005737;GO:0005829;
ENSMUSG00000053398	1893	1147.56	3114.72	1.44018	4.81722e-34	2.11572e-31	Up	Phgdh	236539	3-phosphoglycerate dehydrogenase	Q61753	K00058 serA; D-3-phosphoglycerate dehydrogenase / 2-oxoglutarate reductase [EC:1.1.1.95 1.1.1.399]	mmu00260:Glycine, serine and threonine metabolism;mmu00270:Cysteine and methionine metabolism;mmu01100:Metabolic pathways;mmu01200:Carbon metabolism;mmu01230:Biosynthesis of amino acids;	GO:0004617;GO:0004617;GO:0004617;GO:0016491;GO:0016616;GO:0051287;	GO:0006520;GO:0006541;GO:0006544;GO:0006563;GO:0006564;GO:0006566;GO:0008652;GO:0009448;GO:0010468;GO:0019530;GO:0021510;GO:0021782;GO:0021915;GO:0022008;GO:0031175;GO:0070314;	GO:0043209;
ENSMUSG00000053675	2613	44.1908	108.811	1.30112	0.000179757	0.00316641	Up	Tgm5	74176	transglutaminase 5	Q9D7I9	K05622 TGM5; transglutaminase 5 [EC:2.3.2.13]	NA	GO:0003810;GO:0003810;GO:0016740;GO:0016746;GO:0046872;	GO:0018149;GO:0018149;	GO:0005575;GO:0005737;
ENSMUSG00000053907	3387	8768.16	5687.45	-0.624586	4.556e-05	0.000963562	Down	Mat2a	232087	methionine adenosyltransferase II, alpha	Q99J57	K00789 metK; S-adenosylmethionine synthetase [EC:2.5.1.6]	mmu00270:Cysteine and methionine metabolism;mmu01100:Metabolic pathways;mmu01230:Biosynthesis of amino acids;	GO:0000166;GO:0004478;GO:0004478;GO:0004478;GO:0005524;GO:0016597;GO:0016740;GO:0042802;GO:0046872;GO:0000166;GO:0004478;GO:0004478;GO:0004478;GO:0005524;GO:0016597;GO:0016740;GO:0042802;GO:0046872;	GO:0006556;GO:0006556;GO:0006730;GO:0007623;GO:0009725;GO:0034214;GO:0042493;GO:0051291;GO:0051591;GO:1990830;GO:0006556;GO:0006556;GO:0006730;GO:0007623;GO:0009725;GO:0034214;GO:0042493;GO:0051291;GO:0051591;GO:1990830;	GO:0005829;GO:0005829;GO:0048269;GO:0048269;GO:0005829;GO:0005829;GO:0048269;GO:0048269;
ENSMUSG00000054136	1298	7.84214	29.4286	1.90889	0.00398076	0.0403155	Up	Adm2	223780	adrenomedullin 2	Q7TNK8	NA	NA	GO:0005179;GO:0044877;	GO:0001525;GO:0006468;GO:0007189;GO:0007586;GO:0007631;GO:0010628;GO:0045766;GO:0045776;	GO:0005576;
ENSMUSG00000054293	3044	394.471	211.518	-0.90103	1.07253e-06	3.40521e-05	Down	P2ry10b	213438	purinergic receptor P2Y, G-protein coupled 10B	Q8BY68	K04274 P2RY10; P2Y purinoceptor 10	mmu04080:Neuroactive ligand-receptor interaction;	GO:0004930;	GO:0035025;GO:0051482;	GO:0005887;
ENSMUSG00000054555	7675	3592.1	2340.48	-0.617702	2.5248e-13	2.1743e-11	Down	Adam12	11489	a disintegrin and metallopeptidase domain 12 (meltrin alpha)	Q61824	K06835 ADAM12; disintegrin and metalloproteinase domain-containing protein 12 [EC:3.4.24.-]	NA	GO:0004222;GO:0005515;GO:0008233;GO:0008237;GO:0016787;GO:0017124;GO:0046872;	GO:0006508;GO:0007155;GO:0045766;	GO:0005615;GO:0005654;GO:0005886;GO:0016020;GO:0016021;
ENSMUSG00000054672	4372	94.2502	36.3372	-1.37775	0.00131505	0.016502	Down	5830411N06Rik	244234	RIKEN cDNA 5830411N06 gene	Q8C9T4	NA	NA	GO:0003674;GO:0003674;GO:0003674;	GO:0002365;GO:0032620;GO:0002365;GO:0032620;GO:0002365;GO:0032620;	GO:0009897;GO:0009897;GO:0009897;GO:0009897;GO:0009897;GO:0009897;
ENSMUSG00000054752	7467	598.095	907.65	0.602488	0.00018512	0.00324786	Up	Fsd1l	319636	fibronectin type III and SPRY domain containing 1-like	A1L3T0	NA	NA	GO:0003674;GO:0003674;	GO:0008150;GO:0008150;	GO:0005575;GO:0005575;
ENSMUSG00000054753	3449	290.012	706.572	1.28428	1.4119e-18	2.05524e-16	Up	AU018091	245128	expressed sequence AU018091	Q66JW0	K13865 SLC7A3; solute carrier family 7 (cationic amino acid transporter), member 3	NA	GO:0000064;GO:0015181;GO:0015189;GO:0000064;GO:0015181;GO:0015189;GO:0000064;GO:0015181;GO:0015189;	GO:0097638;GO:1903352;GO:0097638;GO:1903352;GO:0097638;GO:1903352;	NA
ENSMUSG00000055301	3432	371.651	782.149	1.07332	3.44738e-10	2.1853e-08	Up	Adh7	11529	alcohol dehydrogenase 7 (class IV), mu or sigma polypeptide	Q9D748	K13951 ADH1_7; alcohol dehydrogenase 1/7 [EC:1.1.1.1]	mmu00010:Glycolysis / Gluconeogenesis;mmu00071:Fatty acid degradation;mmu00350:Tyrosine metabolism;mmu00830:Retinol metabolism;mmu00980:Metabolism of xenobiotics by cytochrome P450;mmu00982:Drug metabolism - cytochrome P450;mmu01100:Metabolic pathways;mmu05204:Chemical carcinogenesis;	GO:0004022;GO:0004022;GO:0004022;GO:0004024;GO:0004024;GO:0004031;GO:0004745;GO:0004745;GO:0004745;GO:0008270;GO:0008270;GO:0016491;GO:0019841;GO:0035276;GO:0042803;GO:0046872;GO:0048019;GO:0051287;GO:0004022;GO:0004022;GO:0004022;GO:0004024;GO:0004024;GO:0004031;GO:0004745;GO:0004745;GO:0004745;GO:0008270;GO:0008270;GO:0016491;GO:0019841;GO:0035276;GO:0042803;GO:0046872;GO:0048019;GO:0051287;	GO:0001523;GO:0006067;GO:0006068;GO:0006069;GO:0006069;GO:0009617;GO:0010430;GO:0042572;GO:0042572;GO:0042572;GO:0042573;GO:0042573;GO:0045471;GO:0055114;GO:0001523;GO:0006067;GO:0006068;GO:0006069;GO:0006069;GO:0009617;GO:0010430;GO:0042572;GO:0042572;GO:0042572;GO:0042573;GO:0042573;GO:0045471;GO:0055114;	GO:0005737;GO:0005829;GO:0005829;GO:0005886;GO:0005737;GO:0005829;GO:0005829;GO:0005886;
ENSMUSG00000055407	4920	2887.14	1825.13	-0.661996	6.233e-09	3.01934e-07	Down	Map6	17760	microtubule-associated protein 6	Q7TSJ2	K10432 MAP6; microtubule-associated protein 6	NA	GO:0005516;GO:0008017;GO:0008017;GO:0008017;	GO:0000226;GO:0019896;GO:0030705;GO:0032418;GO:0048813;GO:0048813;GO:0050772;GO:0050772;GO:0070507;GO:0070507;	GO:0005737;GO:0005794;GO:0005798;GO:0005801;GO:0005856;GO:0005874;GO:0005874;GO:0016020;GO:0030424;GO:0030424;GO:0030425;GO:0030425;GO:0031410;GO:0042995;GO:0043005;GO:0048471;GO:0099503;
ENSMUSG00000055805	3824	89.5254	37.5809	-1.24631	0.000646034	0.00920762	Down	Fmnl1	57778	formin-like 1	A0A1W2P6X3	NA	NA	GO:0003779;GO:0005522;GO:0005522;GO:0017048;GO:0032794;GO:0032794;GO:0048365;GO:0048365;GO:0051015;GO:0051015;GO:0003779;GO:0005522;GO:0005522;GO:0017048;GO:0032794;GO:0032794;GO:0048365;GO:0048365;GO:0051015;GO:0051015;GO:0003779;GO:0005522;GO:0005522;GO:0017048;GO:0032794;GO:0032794;GO:0048365;GO:0048365;GO:0051015;GO:0051015;GO:0003779;GO:0005522;GO:0005522;GO:0017048;GO:0032794;GO:0032794;GO:…	GO:0006929;GO:0007010;GO:0008360;GO:0008360;GO:0009987;GO:0016043;GO:0030036;GO:0030866;GO:0051014;GO:0006929;GO:0007010;GO:0008360;GO:0008360;GO:0009987;GO:0016043;GO:0030036;GO:0030866;GO:0051014;GO:0006929;GO:0007010;GO:0008360;GO:0008360;GO:0009987;GO:0016043;GO:0030036;GO:0030866;GO:0051014;GO:0006929;GO:0007010;GO:0008360;GO:0008360;GO:0009987;GO:0016043;GO:0030036;GO:0030866;GO:0051014;	GO:0005737;GO:0005829;GO:0005829;GO:0005886;GO:0016020;GO:0031410;GO:0045335;GO:0005737;GO:0005829;GO:0005829;GO:0005886;GO:0016020;GO:0031410;GO:0045335;GO:0005737;GO:0005829;GO:0005829;GO:0005886;GO:0016020;GO:0031410;GO:0045335;GO:0005737;GO:0005829;GO:0005829;GO:0005886;GO:0016020;GO:0031410;GO:0045335;
ENSMUSG00000055866	5833	455.429	946.966	1.05593	2.83122e-15	3.0084e-13	Up	Per2	18627	period circadian clock 2	Q8C8R0	K02633 PER2; period circadian protein 2	mmu04710:Circadian rhythm;mmu04713:Circadian entrainment;mmu05202:Transcriptional misregulation in cancer;mmu05221:Acute myeloid leukemia;	GO:0000976;GO:0000976;GO:0000980;GO:0001222;GO:0001222;GO:0003713;GO:0005515;GO:0008134;GO:0008134;GO:0019900;GO:0035257;GO:0036002;GO:0042802;GO:0042826;GO:0070063;GO:1990226;GO:0000976;GO:0000976;GO:0000980;GO:0001222;GO:0001222;GO:0003713;GO:0005515;GO:0008134;GO:0008134;GO:0019900;GO:0035257;GO:0036002;GO:0042802;GO:0042826;GO:0070063;GO:1990226;GO:0000976;GO:0000976;GO:0000980;GO:0001222;GO:…	GO:0000122;GO:0000122;GO:0000122;GO:0000122;GO:0002931;GO:0005978;GO:0006094;GO:0006631;GO:0007623;GO:0007623;GO:0009416;GO:0019229;GO:0019249;GO:0031397;GO:0032922;GO:0032922;GO:0032922;GO:0042752;GO:0042754;GO:0043153;GO:0045892;GO:0045892;GO:0050767;GO:0050796;GO:0050872;GO:0051726;GO:0051946;GO:0060567;GO:0070345;GO:0070932;GO:0097167;GO:0120162;GO:2000678;GO:0000122;GO:0000122;GO:0000122;GO:…	GO:0005634;GO:0005634;GO:0005634;GO:0005634;GO:0005737;GO:0005737;GO:0048471;GO:0005634;GO:0005634;GO:0005634;GO:0005634;GO:0005737;GO:0005737;GO:0048471;GO:0005634;GO:0005634;GO:0005634;GO:0005634;GO:0005737;GO:0005737;GO:0048471;GO:0005634;GO:0005634;GO:0005634;GO:0005634;GO:0005737;GO:0005737;GO:0048471;
ENSMUSG00000056133	2649	538.943	246.39	-1.12622	3.14175e-12	2.52413e-10	Down	Unc93a2	667055	unc-93 homolog A2	B2RWK3	NA	NA	GO:0003674;	GO:0008150;	GO:0005886;
ENSMUSG00000056296	4289	64.7628	13.8271	-2.23656	1.31088e-06	4.06403e-05	Down	Synpr	72003	synaptoporin	Q8BGN8	NA	NA	GO:0017075;	NA	GO:0008021;GO:0016020;GO:0016021;GO:0030054;GO:0030285;GO:0030285;GO:0030672;GO:0031410;GO:0043005;GO:0045202;
ENSMUSG00000056313	1805	425.34	724.751	0.768799	4.40684e-08	1.83748e-06	Up	Tcim	69068	transcriptional and immune response regulator	Q9D915	NA	NA	GO:0005112;GO:0005112;	GO:0002264;GO:0002264;GO:0006915;GO:0010739;GO:0034605;GO:0043066;GO:0043620;GO:0045746;GO:0045746;GO:1900020;GO:1901224;GO:1902806;GO:1903706;	GO:0005634;GO:0005634;GO:0005634;GO:0005654;GO:0005730;GO:0005737;GO:0005737;GO:0005829;GO:0005829;GO:0005886;GO:0016607;
ENSMUSG00000056328	6081	7733.75	4572.75	-0.758118	2.13087e-26	5.84924e-24	Down	Myh1	17879	myosin, heavy polypeptide 1, skeletal muscle, adult	Q5SX40	K10352 MYH; myosin heavy chain	mmu04530:Tight junction;	GO:0000166;GO:0003774;GO:0003779;GO:0005516;GO:0005524;GO:0051015;	GO:0006936;	GO:0005737;GO:0005859;GO:0014704;GO:0016459;GO:0031672;GO:0032982;GO:0036464;
ENSMUSG00000056632	6212	161.199	84.7052	-0.933389	0.000531633	0.00784716	Down	Dsg3	13512	desmoglein 3	Q3UFC6	K07598 DSG3; desmoglein 3	NA	GO:0005509;GO:0005509;GO:0046872;GO:0005509;GO:0005509;GO:0046872;	GO:0007155;GO:0007156;GO:0098609;GO:0007155;GO:0007156;GO:0098609;	GO:0005886;GO:0005887;GO:0005911;GO:0005914;GO:0016020;GO:0016021;GO:0030054;GO:0030057;GO:0030057;GO:0005886;GO:0005887;GO:0005911;GO:0005914;GO:0016020;GO:0016021;GO:0030054;GO:0030057;GO:0030057;
ENSMUSG00000056671	868	100.21	167.061	0.737159	0.00469264	0.0457662	Up	Prelid2	77619	PRELI domain containing 2	Q0VBB0	NA	NA	GO:1990050;	GO:0015914;	GO:0005739;GO:0005758;
ENSMUSG00000056888	1183	19.0014	51.8697	1.44873	0.00125895	0.0159653	Up	Glipr1	73690	GLI pathogenesis-related 1 (glioma)	Q9CWG1	NA	NA	NA	NA	GO:0005576;GO:0005615;GO:0016020;GO:0016021;GO:0005576;GO:0005615;GO:0016020;GO:0016021;
ENSMUSG00000057003	6016	2167.31	1252.15	-0.79068	6.32785e-14	5.78998e-12	Down	Myh4	17884	myosin, heavy polypeptide 4, skeletal muscle	Q5SX39	K10352 MYH; myosin heavy chain	mmu04530:Tight junction;	GO:0000166;GO:0003725;GO:0003774;GO:0003779;GO:0005516;GO:0005524;GO:0051015;GO:0000166;GO:0003725;GO:0003774;GO:0003779;GO:0005516;GO:0005524;GO:0051015;	GO:0006936;GO:0014823;GO:0006936;GO:0014823;	GO:0005737;GO:0016459;GO:0030016;GO:0032982;GO:0005737;GO:0016459;GO:0030016;GO:0032982;
ENSMUSG00000057098	5981	411.82	668.444	0.699691	2.88782e-07	1.04821e-05	Up	Ebf1	13591	early B cell factor 1	Q5SWK8	K09103 EBF; early B-cell factor	NA	GO:0000978;GO:0001228;GO:0001228;GO:0003677;GO:0003700;GO:0005515;GO:0046872;GO:0046983;GO:0070742;GO:0000978;GO:0001228;GO:0001228;GO:0003677;GO:0003700;GO:0005515;GO:0046872;GO:0046983;GO:0070742;GO:0000978;GO:0001228;GO:0001228;GO:0003677;GO:0003700;GO:0005515;GO:0046872;GO:0046983;GO:0070742;GO:0000978;GO:0001228;GO:0001228;GO:0003677;GO:0003700;GO:0005515;GO:0046872;GO:0046983;GO:0070742;GO:…	GO:0006355;GO:0007275;GO:0045893;GO:0045944;GO:0045944;GO:0006355;GO:0007275;GO:0045893;GO:0045944;GO:0045944;GO:0006355;GO:0007275;GO:0045893;GO:0045944;GO:0045944;GO:0006355;GO:0007275;GO:0045893;GO:0045944;GO:0045944;GO:0006355;GO:0007275;GO:0045893;GO:0045944;GO:0045944;GO:0006355;GO:0007275;GO:0045893;GO:0045944;GO:0045944;	GO:0005634;GO:0005634;GO:0005634;GO:0005634;GO:0005634;GO:0005634;GO:0005634;GO:0005634;GO:0005634;GO:0005634;GO:0005634;GO:0005634;
ENSMUSG00000057880	4636	39.2924	13.683	-1.5139	0.00341355	0.0356394	Down	Abat	268860	4-aminobutyrate aminotransferase	P61922	K13524 ABAT; 4-aminobutyrate aminotransferase / (S)-3-amino-2-methylpropionate transaminase [EC:2.6.1.19 2.6.1.22]	mmu00250:Alanine, aspartate and glutamate metabolism;mmu00280:Valine, leucine and isoleucine degradation;mmu00410:beta-Alanine metabolism;mmu00640:Propanoate metabolism;mmu00650:Butanoate metabolism;mmu01100:Metabolic pathways;mmu04727:GABAergic synapse;	GO:0003824;GO:0003867;GO:0003867;GO:0008483;GO:0016740;GO:0030170;GO:0030170;GO:0042803;GO:0046872;GO:0047298;GO:0051536;	GO:0001666;GO:0007568;GO:0007620;GO:0007626;GO:0009448;GO:0009449;GO:0009450;GO:0010039;GO:0014053;GO:0031652;GO:0032024;GO:0033602;GO:0035094;GO:0035640;GO:0042135;GO:0042220;GO:0042493;GO:0045471;GO:0045776;GO:0045964;GO:0048148;GO:0070474;GO:0090331;GO:0097151;GO:1902722;GO:1904450;	GO:0005739;GO:0005739;GO:0005739;GO:0005759;GO:0032144;GO:0043005;
ENSMUSG00000058135	1289	824.659	1555.15	0.914814	1.35529e-17	1.76805e-15	Up	Gstm1	14862	glutathione S-transferase, mu 1	A2AE89	K00799 GST; glutathione S-transferase [EC:2.5.1.18]	mmu00480:Glutathione metabolism;mmu00980:Metabolism of xenobiotics by cytochrome P450;mmu00982:Drug metabolism - cytochrome P450;mmu00983:Drug metabolism - other enzymes;mmu01100:Metabolic pathways;mmu01524:Platinum drug resistance;mmu05200:Pathways in cancer;mmu05204:Chemical carcinogenesis;mmu05225:Hepatocellular carcinoma;mmu05418:Fluid shear stress and atherosclerosis;	GO:0004364;GO:0004364;GO:0005496;GO:0005515;GO:0016151;GO:0016740;GO:0019901;GO:0042802;GO:0042803;GO:0042803;GO:0043295;GO:0046982;GO:0004364;GO:0004364;GO:0005496;GO:0005515;GO:0016151;GO:0016740;GO:0019901;GO:0042802;GO:0042803;GO:0042803;GO:0043295;GO:0046982;	GO:0006749;GO:0006749;GO:0035690;GO:0042178;GO:0042178;GO:0006749;GO:0006749;GO:0035690;GO:0042178;GO:0042178;	GO:0005576;GO:0005737;GO:0005829;GO:0005829;GO:0032991;GO:0043209;GO:0045171;GO:0005576;GO:0005737;GO:0005829;GO:0005829;GO:0032991;GO:0043209;GO:0045171;
ENSMUSG00000058402	2982	217.126	115.857	-0.907578	0.00108832	0.0140585	Down	Zfp420	233058	zinc finger protein 420	Q7TMN8	K09228 KRAB; KRAB domain-containing zinc finger protein	mmu05168:Herpes simplex virus 1 infection;	GO:0003674;	GO:0001835;	GO:0005575;
ENSMUSG00000058454	2815	1364.31	2335.28	0.774995	3.80553e-16	4.36938e-14	Up	Dhcr7	13360	7-dehydrocholesterol reductase	A0A140LIT2	K00213 DHCR7; 7-dehydrocholesterol reductase [EC:1.3.1.21]	mmu00100:Steroid biosynthesis;mmu01100:Metabolic pathways;	GO:0009918;GO:0016491;GO:0016628;GO:0047598;GO:0047598;GO:0047598;GO:0009918;GO:0016491;GO:0016628;GO:0047598;GO:0047598;GO:0047598;	GO:0001568;GO:0006629;GO:0006694;GO:0006695;GO:0006695;GO:0008202;GO:0008203;GO:0009791;GO:0016126;GO:0016126;GO:0016132;GO:0030154;GO:0030324;GO:0035264;GO:0042127;GO:0045540;GO:0001568;GO:0006629;GO:0006694;GO:0006695;GO:0006695;GO:0008202;GO:0008203;GO:0009791;GO:0016126;GO:0016126;GO:0016132;GO:0030154;GO:0030324;GO:0035264;GO:0042127;GO:0045540;	GO:0005640;GO:0005783;GO:0005829;GO:0016020;GO:0016021;GO:0030176;GO:0043231;GO:0005640;GO:0005783;GO:0005829;GO:0016020;GO:0016021;GO:0030176;GO:0043231;
ENSMUSG00000058914	2338	15018.7	7607.15	-0.981436	2.4901e-56	2.98269e-53	Down	C1qtnf3	81799	C1q and tumor necrosis factor related protein 3	Q9ES30	NA	NA	GO:0042802;GO:0042802;GO:0042802;	GO:0010629;GO:0035356;GO:0042593;GO:0045721;GO:0045721;GO:0050715;GO:0050715;GO:0050728;GO:0051259;GO:0051897;GO:0070165;GO:0070165;GO:0070206;GO:0070374;GO:0071638;GO:1900165;GO:1901223;GO:0010629;GO:0035356;GO:0042593;GO:0045721;GO:0045721;GO:0050715;GO:0050715;GO:0050728;GO:0051259;GO:0051897;GO:0070165;GO:0070165;GO:0070206;GO:0070374;GO:0071638;GO:1900165;GO:1901223;GO:0010629;GO:0035356;GO:…	GO:0005576;GO:0005581;GO:0005615;GO:0005576;GO:0005581;GO:0005615;GO:0005576;GO:0005581;GO:0005615;
ENSMUSG00000059430	1333	1212.22	731.822	-0.727356	1.19325e-09	6.69033e-08	Down	Actg2	11468	actin, gamma 2, smooth muscle, enteric	Q3UJ36	K12315 ACTG2; actin, gamma-enteric smooth muscle	mmu04270:Vascular smooth muscle contraction;	GO:0000166;GO:0005524;GO:0000166;GO:0005524;	NA	GO:0005737;GO:0005856;GO:0071944;GO:0005737;GO:0005856;GO:0071944;
ENSMUSG00000059588	4882	316.055	595.913	0.915104	1.85539e-09	1.0019e-07	Up	Calcrl	54598	calcitonin receptor-like	Q9R1W5	K04577 CALCRL; calcitonin receptor-like	mmu04080:Neuroactive ligand-receptor interaction;mmu04270:Vascular smooth muscle contraction;	GO:0001605;GO:0001605;GO:0001635;GO:0001635;GO:0001635;GO:0004888;GO:0004930;GO:0004948;GO:1990409;GO:0001605;GO:0001605;GO:0001635;GO:0001635;GO:0001635;GO:0004888;GO:0004930;GO:0004948;GO:1990409;	GO:0001525;GO:0001525;GO:0006816;GO:0007165;GO:0007166;GO:0007186;GO:0007189;GO:0007189;GO:0007507;GO:0008284;GO:0015031;GO:0031623;GO:0045986;GO:0048661;GO:0050728;GO:0071329;GO:1990408;GO:1990410;GO:0001525;GO:0001525;GO:0006816;GO:0007165;GO:0007166;GO:0007186;GO:0007189;GO:0007189;GO:0007507;GO:0008284;GO:0015031;GO:0031623;GO:0045986;GO:0048661;GO:0050728;GO:0071329;GO:1990408;GO:1990410;	GO:0005737;GO:0005764;GO:0005768;GO:0005783;GO:0005886;GO:0016020;GO:0016021;GO:1903143;GO:1990406;GO:0005737;GO:0005764;GO:0005768;GO:0005783;GO:0005886;GO:0016020;GO:0016021;GO:1903143;GO:1990406;
ENSMUSG00000059674	3489	372.326	241.997	-0.623155	0.000647601	0.00920762	Down	Cdh24	239096	cadherin-like 24	Q6PFX6	K06814 CDH24; cadherin-like 24	NA	GO:0005509;GO:0005509;GO:0008013;GO:0008092;GO:0042803;GO:0045294;GO:0045296;GO:0046872;GO:0070097;	GO:0000902;GO:0007043;GO:0007155;GO:0007156;GO:0016339;GO:0034332;GO:0044331;GO:0098609;GO:0098609;	GO:0005886;GO:0005911;GO:0005913;GO:0009986;GO:0016020;GO:0016021;GO:0016342;
ENSMUSG00000059743	2953	6891.39	11447.1	0.732093	5.19074e-27	1.51985e-24	Up	Fdps	110196	farnesyl diphosphate synthetase	Q4FJN9	K00787 FDPS; farnesyl diphosphate synthase [EC:2.5.1.1 2.5.1.10]	mmu00900:Terpenoid backbone biosynthesis;mmu01100:Metabolic pathways;mmu05164:Influenza A;mmu05166:Human T-cell leukemia virus 1 infection;	GO:0004161;GO:0004337;GO:0004337;GO:0016740;GO:0046872;GO:0004161;GO:0004337;GO:0004337;GO:0016740;GO:0046872;	GO:0006629;GO:0006694;GO:0006695;GO:0008202;GO:0008203;GO:0008299;GO:0016126;GO:0045337;GO:0045337;GO:0045542;GO:0061051;GO:0006629;GO:0006694;GO:0006695;GO:0008202;GO:0008203;GO:0008299;GO:0016126;GO:0045337;GO:0045337;GO:0045542;GO:0061051;	GO:0005654;GO:0005737;GO:0005739;GO:0005759;GO:0005777;GO:0005829;GO:0005654;GO:0005737;GO:0005739;GO:0005759;GO:0005777;GO:0005829;
ENSMUSG00000059824	1837	620.771	1379.7	1.15207	7.45112e-18	9.91677e-16	Up	Dbp	13170	D site albumin promoter binding protein	A0A1B0GS46	K09056 DBP; albumin D box-binding protein	NA	GO:0000977;GO:0000977;GO:0001228;GO:0003677;GO:0003700;GO:0000977;GO:0000977;GO:0001228;GO:0003677;GO:0003700;GO:0000977;GO:0000977;GO:0001228;GO:0003677;GO:0003700;	GO:0006355;GO:0006357;GO:0007623;GO:0045944;GO:0048511;GO:0006355;GO:0006357;GO:0007623;GO:0045944;GO:0048511;GO:0006355;GO:0006357;GO:0007623;GO:0045944;GO:0048511;	GO:0005634;GO:0005634;GO:0005634;GO:0005634;GO:0005634;GO:0005634;
ENSMUSG00000060459	2294	372.432	110.154	-1.76107	1.11038e-17	1.46303e-15	Down	Kng2	385643	kininogen 2	Q6S9I3	K03898 KNG; kininogen	mmu04022:cGMP-PKG signaling pathway;mmu04071:Sphingolipid signaling pathway;mmu04080:Neuroactive ligand-receptor interaction;mmu04610:Complement and coagulation cascades;mmu04750:Inflammatory mediator regulation of TRP channels;mmu04810:Regulation of actin cytoskeleton;mmu05142:Chagas disease (American trypanosomiasis);mmu05143:African trypanosomiasis;mmu05200:Pathways in cancer;	GO:0004869;GO:0004869;GO:0005102;GO:0004869;GO:0004869;GO:0005102;GO:0004869;GO:0004869;GO:0005102;	GO:0007204;GO:0010951;GO:0030195;GO:0007204;GO:0010951;GO:0030195;GO:0007204;GO:0010951;GO:0030195;	GO:0005576;GO:0005615;GO:0062023;GO:0005576;GO:0005615;GO:0062023;GO:0005576;GO:0005615;GO:0062023;
ENSMUSG00000060938	657	101.562	307.172	1.5952	3.63468e-05	0.000786379	Up	Rpl26	19941	ribosomal protein L26	Q4FZH2	K02898 RP-L26e; large subunit ribosomal protein L26e	mmu03010:Ribosome;	GO:0003723;GO:0003735;GO:0005515;GO:0048027;GO:0003723;GO:0003735;GO:0005515;GO:0048027;	GO:0002181;GO:0006364;GO:0006977;GO:0006977;GO:0034644;GO:0042273;GO:0042273;GO:0045727;GO:0071479;GO:0071480;GO:1902164;GO:1902167;GO:1902167;GO:1904803;GO:0002181;GO:0006364;GO:0006977;GO:0006977;GO:0034644;GO:0042273;GO:0042273;GO:0045727;GO:0071479;GO:0071480;GO:1902164;GO:1902167;GO:1902167;GO:1904803;	GO:0005654;GO:0005730;GO:0005737;GO:0022625;GO:0022625;GO:0022626;GO:0043195;GO:1990904;GO:0005654;GO:0005730;GO:0005737;GO:0022625;GO:0022625;GO:0022626;GO:0043195;GO:1990904;
ENSMUSG00000061740	3398	501.538	816.384	0.702282	3.82122e-09	1.93647e-07	Up	Cyp2d22	56448	cytochrome P450, family 2, subfamily d, polypeptide 22	Q9JKY7	K07414 CYP2D; cytochrome P450 family 2 subfamily D [EC:1.14.14.1]	mmu00140:Steroid hormone biosynthesis;mmu04726:Serotonergic synapse;	GO:0004497;GO:0008391;GO:0008395;GO:0016712;GO:0020037;	GO:0006082;GO:0006587;GO:0006805;GO:0008207;GO:0017144;GO:0019369;GO:0019369;GO:0042416;GO:0042417;GO:0042738;GO:0055114;	GO:0005737;GO:0005737;GO:0043231;GO:0043231;
ENSMUSG00000062310	1957	17.6339	45.3603	1.36423	0.00463959	0.0453495	Up	Glrp1	14659	glutamine repeat protein 1	E9Q9S8	NA	NA	GO:0003674;	GO:0000122;	GO:0005634;
ENSMUSG00000062480	2144	399.956	640.932	0.680999	0.000169264	0.00299359	Up	Acat3	224530	acetyl-Coenzyme A acetyltransferase 3	Q80X81	NA	NA	GO:0003985;GO:0003985;GO:0003988;	GO:0006635;	GO:0005634;GO:0005730;GO:0005737;GO:0005739;GO:0005739;GO:0005829;
ENSMUSG00000062609	5705	94.0595	28.0589	-1.74801	1.74156e-06	5.27513e-05	Down	Kcnj15	16516	potassium inwardly-rectifying channel, subfamily J, member 15	Q3TNE6	K05008 KCNJ15; potassium inwardly-rectifying channel subfamily J member 15	mmu04971:Gastric acid secretion;	GO:0005242;GO:0005242;GO:0005244;GO:0005267;GO:0005515;GO:0005242;GO:0005242;GO:0005244;GO:0005267;GO:0005515;GO:0005242;GO:0005242;GO:0005244;GO:0005267;GO:0005515;	GO:0006811;GO:0006813;GO:0034765;GO:1990573;GO:0006811;GO:0006813;GO:0034765;GO:1990573;GO:0006811;GO:0006813;GO:0034765;GO:1990573;	GO:0005886;GO:0016020;GO:0016021;GO:0005886;GO:0016020;GO:0016021;GO:0005886;GO:0016020;GO:0016021;
ENSMUSG00000063415	4495	139.881	51.7168	-1.43213	7.02457e-07	2.34318e-05	Down	Cyp26b1	232174	cytochrome P450, family 26, subfamily b, polypeptide 1	A0A0N4SUV4	K12664 CYP26B; cytochrome P450 family 26 subfamily B	mmu00830:Retinol metabolism;mmu01100:Metabolic pathways;	GO:0001972;GO:0004497;GO:0005506;GO:0008401;GO:0016491;GO:0016705;GO:0016709;GO:0020037;GO:0046872;GO:0001972;GO:0004497;GO:0005506;GO:0008401;GO:0016491;GO:0016705;GO:0016709;GO:0020037;GO:0046872;	GO:0001709;GO:0001768;GO:0006805;GO:0006954;GO:0007140;GO:0007283;GO:0009954;GO:0010628;GO:0016125;GO:0030326;GO:0034653;GO:0034653;GO:0042573;GO:0043587;GO:0045580;GO:0048384;GO:0048384;GO:0048385;GO:0048387;GO:0055114;GO:0055114;GO:0060349;GO:0061436;GO:0070268;GO:0071300;GO:2001037;GO:0001709;GO:0001768;GO:0006805;GO:0006954;GO:0007140;GO:0007283;GO:0009954;GO:0010628;GO:0016125;GO:0030326;GO:…	GO:0005737;GO:0005783;GO:0016020;GO:0043231;GO:0005737;GO:0005783;GO:0016020;GO:0043231;
ENSMUSG00000063558	6429	556.538	903.526	0.698227	1.24147e-08	5.69953e-07	Up	Aox1	11761	aldehyde oxidase 1	O54754	K00157 AOX; aldehyde oxidase [EC:1.2.3.1]	mmu00280:Valine, leucine and isoleucine degradation;mmu00350:Tyrosine metabolism;mmu00380:Tryptophan metabolism;mmu00750:Vitamin B6 metabolism;mmu00760:Nicotinate and nicotinamide metabolism;mmu00830:Retinol metabolism;mmu00982:Drug metabolism - cytochrome P450;mmu01100:Metabolic pathways;mmu04630:JAK-STAT signaling pathway;	GO:0004031;GO:0004031;GO:0004854;GO:0005506;GO:0009055;GO:0016491;GO:0042802;GO:0042803;GO:0042803;GO:0043546;GO:0046872;GO:0050250;GO:0050660;GO:0050660;GO:0051287;GO:0051536;GO:0051537;GO:0071949;GO:0004031;GO:0004031;GO:0004854;GO:0005506;GO:0009055;GO:0016491;GO:0042802;GO:0042803;GO:0042803;GO:0043546;GO:0046872;GO:0050250;GO:0050660;GO:0050660;GO:0051287;GO:0051536;GO:0051537;GO:0071949;	GO:0009115;GO:0017144;GO:0017144;GO:0055114;GO:0009115;GO:0017144;GO:0017144;GO:0055114;	GO:0005737;GO:0005829;GO:0005829;GO:0005829;GO:0005737;GO:0005829;GO:0005829;GO:0005829;
ENSMUSG00000063564	5658	2046.33	695.732	-1.55701	1.22032e-58	1.78655e-55	Down	Col23a1	237759	collagen, type XXIII, alpha 1	Q8K4G2	NA	NA	GO:0005201;GO:0008201;GO:0030020;GO:0042802;GO:0042803;	GO:0001525;GO:0001886;GO:0030198;GO:0070207;	GO:0005581;GO:0005615;GO:0005615;GO:0005886;GO:0009986;GO:0016020;GO:0016021;GO:0031012;GO:0062023;
ENSMUSG00000063727	2818	288.569	170.622	-0.76034	0.000127068	0.00234489	Down	Tnfrsf11b	18383	tumor necrosis factor receptor superfamily, member 11b (osteoprotegerin)	Q3UK97	K05148 TNFRSF11B; tumor necrosis factor receptor superfamily member 11B	mmu04060:Cytokine-cytokine receptor interaction;mmu04380:Osteoclast differentiation;	GO:0005515;GO:0005515;	GO:0006915;GO:0007165;GO:0030198;GO:0042489;GO:0045779;GO:0006915;GO:0007165;GO:0030198;GO:0042489;GO:0045779;	GO:0005576;GO:0005615;GO:0005615;GO:0031012;GO:0005576;GO:0005615;GO:0005615;GO:0031012;
ENSMUSG00000064147	4105	170.827	94.9938	-0.848719	0.00160792	0.0195803	Down	Rab44	442827	RAB44, member RAS oncogene family	Q8CB87	NA	NA	GO:0000166;GO:0003924;GO:0005525;	GO:0006886;GO:0032482;	GO:0005886;GO:0016020;
ENSMUSG00000064262	3160	64.5774	24.0003	-1.43334	0.00102335	0.0133633	Down	Gimap8	243374	GTPase, IMAP family member 8	A0A0R3P9C7	NA	NA	GO:0000166;GO:0005525;GO:0000166;GO:0005525;	GO:0070232;GO:0070232;	GO:0005737;GO:0005739;GO:0005783;GO:0005794;GO:0005737;GO:0005739;GO:0005783;GO:0005794;
ENSMUSG00000064356	204	35421.6	19672.9	-0.84841	0.00277208	0.0300198	Down	ATP8	17706	ATP synthase F0 subunit 8	Q7JCZ0	K02125 ATPeF08; F-type H+-transporting ATPase subunit 8	mmu00190:Oxidative phosphorylation;mmu01100:Metabolic pathways;mmu04714:Thermogenesis;mmu05010:Alzheimer disease;mmu05012:Parkinson disease;mmu05016:Huntington disease;	GO:0015078;GO:0016887;GO:0015078;GO:0016887;	GO:0006754;GO:0006811;GO:0015986;GO:0006754;GO:0006811;GO:0015986;	GO:0000276;GO:0005739;GO:0005753;GO:0005753;GO:0016020;GO:0016021;GO:0045263;GO:0000276;GO:0005739;GO:0005753;GO:0005753;GO:0016020;GO:0016021;GO:0045263;
ENSMUSG00000064358	784	107869	59406.4	-0.860581	6.3734e-13	5.34878e-11	Down	COX3	17710	cytochrome c oxidase subunit III	Q7JCX7	K02262 COX3; cytochrome c oxidase subunit 3	mmu00190:Oxidative phosphorylation;mmu01100:Metabolic pathways;mmu04260:Cardiac muscle contraction;mmu04714:Thermogenesis;mmu04932:Non-alcoholic fatty liver disease (NAFLD);mmu05010:Alzheimer disease;mmu05012:Parkinson disease;mmu05016:Huntington disease;	GO:0004129;GO:0009055;GO:0015002;GO:0015453;GO:0004129;GO:0009055;GO:0015002;GO:0015453;	GO:0006123;GO:0008535;GO:0009060;GO:0019646;GO:0022904;GO:0006123;GO:0008535;GO:0009060;GO:0019646;GO:0022904;	GO:0005739;GO:0005739;GO:0005743;GO:0016020;GO:0016021;GO:0045277;GO:0005739;GO:0005739;GO:0005743;GO:0016020;GO:0016021;GO:0045277;
ENSMUSG00000064360	348	3644.39	1862.13	-0.968909	3.81359e-16	4.36938e-14	Down	ND3	17718	NADH dehydrogenase subunit 3	Q7GIP5	K03880 ND3; NADH-ubiquinone oxidoreductase chain 3 [EC:7.1.1.2]	mmu00190:Oxidative phosphorylation;mmu01100:Metabolic pathways;mmu04714:Thermogenesis;mmu04723:Retrograde endocannabinoid signaling;mmu05012:Parkinson disease;	GO:0008137;GO:0008137;	GO:0006979;GO:0009725;GO:0055114;GO:0071385;GO:0006979;GO:0009725;GO:0055114;GO:0071385;	GO:0005739;GO:0005747;GO:0005747;GO:0016020;GO:0016021;GO:0030964;GO:0070469;GO:0005739;GO:0005747;GO:0005747;GO:0016020;GO:0016021;GO:0030964;GO:0070469;
ENSMUSG00000064367	1824	195688	100459	-0.96194	7.19216e-15	7.1251e-13	Down	ND5	17721	NADH dehydrogenase subunit 5	Q9MD82	K03883 ND5; NADH-ubiquinone oxidoreductase chain 5 [EC:7.1.1.2]	mmu00190:Oxidative phosphorylation;mmu01100:Metabolic pathways;mmu04714:Thermogenesis;mmu04723:Retrograde endocannabinoid signaling;mmu05012:Parkinson disease;	GO:0003954;GO:0008137;GO:0003954;GO:0008137;	GO:0042773;GO:0055114;GO:0042773;GO:0055114;	GO:0005739;GO:0005743;GO:0005747;GO:0016020;GO:0016021;GO:0043005;GO:0070469;GO:0005739;GO:0005743;GO:0005747;GO:0016020;GO:0016021;GO:0043005;GO:0070469;
ENSMUSG00000064368	519	47089.2	24864.8	-0.921281	4.79751e-11	3.30953e-09	Down	ND6	17722	NADH dehydrogenase subunit 6	Q7JCY4	K03884 ND6; NADH-ubiquinone oxidoreductase chain 6 [EC:7.1.1.2]	mmu00190:Oxidative phosphorylation;mmu01100:Metabolic pathways;mmu04714:Thermogenesis;mmu04723:Retrograde endocannabinoid signaling;mmu05012:Parkinson disease;	GO:0008137;GO:0008137;	GO:0055114;GO:0055114;	GO:0005739;GO:0016020;GO:0016021;GO:0070469;GO:0005739;GO:0016020;GO:0016021;GO:0070469;
ENSMUSG00000064370	1144	199719	110341	-0.856001	2.84621e-18	3.98954e-16	Down	CYTB	17711	cytochrome b	Q7JCZ3	K00412 CYTB; ubiquinol-cytochrome c reductase cytochrome b subunit	mmu00190:Oxidative phosphorylation;mmu01100:Metabolic pathways;mmu04260:Cardiac muscle contraction;mmu04714:Thermogenesis;mmu04932:Non-alcoholic fatty liver disease (NAFLD);mmu05010:Alzheimer disease;mmu05012:Parkinson disease;mmu05016:Huntington disease;	GO:0008121;GO:0008121;GO:0009055;GO:0016491;GO:0020037;GO:0044877;GO:0045153;GO:0046872;GO:0008121;GO:0008121;GO:0009055;GO:0016491;GO:0020037;GO:0044877;GO:0045153;GO:0046872;	GO:0006122;GO:0006122;GO:0015990;GO:0022904;GO:0033762;GO:0042538;GO:0046686;GO:0046689;GO:0051592;GO:0055114;GO:0006122;GO:0006122;GO:0015990;GO:0022904;GO:0033762;GO:0042538;GO:0046686;GO:0046689;GO:0051592;GO:0055114;	GO:0005739;GO:0005739;GO:0005739;GO:0005743;GO:0005750;GO:0016020;GO:0016021;GO:0031305;GO:0031305;GO:0032991;GO:0045275;GO:0070469;GO:0005739;GO:0005739;GO:0005739;GO:0005743;GO:0005750;GO:0016020;GO:0016021;GO:0031305;GO:0031305;GO:0032991;GO:0045275;GO:0070469;
ENSMUSG00000066026	2337	733.361	1326.91	0.854656	4.68044e-11	3.24576e-09	Up	Dhrs3	20148	dehydrogenase/reductase (SDR family) member 3	O88876	K11146 DHRS3; short-chain dehydrogenase/reductase 3 [EC:1.1.1.300]	mmu00830:Retinol metabolism;mmu01100:Metabolic pathways;	GO:0004745;GO:0004745;GO:0016491;GO:0052650;GO:0004745;GO:0004745;GO:0016491;GO:0052650;	GO:0001523;GO:0001523;GO:0003151;GO:0030278;GO:0042572;GO:0048385;GO:0048387;GO:0060021;GO:0060349;GO:0060411;GO:0001523;GO:0001523;GO:0003151;GO:0030278;GO:0042572;GO:0048385;GO:0048387;GO:0060021;GO:0060349;GO:0060411;	GO:0005811;GO:0016020;GO:0016021;GO:0005811;GO:0016020;GO:0016021;
ENSMUSG00000066113	7839	607.799	364.18	-0.73858	2.38893e-07	8.7435e-06	Down	Adamtsl1	77739	ADAMTS-like 1	Q9CX59	NA	NA	GO:0003674;GO:0008233;GO:0003674;GO:0008233;GO:0003674;GO:0008233;	GO:0008150;GO:0008150;GO:0008150;	GO:0005576;GO:0062023;GO:0005576;GO:0062023;GO:0005576;GO:0062023;
ENSMUSG00000066595	4040	487.896	193.821	-1.3345	2.28715e-16	2.71491e-14	Down	Flvcr1	226844	feline leukemia virus subgroup C cellular receptor 1	A0A0A6YWJ7	K08220 FLVCR; MFS transporter, FLVCR family, feline leukemia virus subgroup C receptor-related protein	NA	GO:0015232;GO:0015232;GO:0020037;GO:0015232;GO:0015232;GO:0020037;	GO:0001568;GO:0001701;GO:0006839;GO:0006839;GO:0015886;GO:0030218;GO:0030218;GO:0030218;GO:0035108;GO:0035264;GO:0042733;GO:0043249;GO:0046620;GO:0048536;GO:0048704;GO:0055085;GO:0060323;GO:0097037;GO:0097037;GO:0001568;GO:0001701;GO:0006839;GO:0006839;GO:0015886;GO:0030218;GO:0030218;GO:0030218;GO:0035108;GO:0035264;GO:0042733;GO:0043249;GO:0046620;GO:0048536;GO:0048704;GO:0055085;GO:0060323;GO:…	GO:0005739;GO:0005739;GO:0005886;GO:0016020;GO:0016021;GO:0005739;GO:0005739;GO:0005886;GO:0016020;GO:0016021;
ENSMUSG00000067586	4463	235.525	526.76	1.16101	3.71331e-15	3.88306e-13	Up	S1pr3	13610	sphingosine-1-phosphate receptor 3	Q9Z0U9	K04290 S1PR3; sphingosine 1-phosphate receptor 3	mmu04071:Sphingolipid signaling pathway;mmu04080:Neuroactive ligand-receptor interaction;	GO:0004930;GO:0005178;GO:0038036;	GO:0001816;GO:0006954;GO:0007165;GO:0007186;GO:0007193;GO:0007219;GO:0032651;GO:1903141;	GO:0005886;GO:0005887;GO:0016020;GO:0016021;
ENSMUSG00000067818	1128	829.664	456.658	-0.86037	2.07859e-07	7.75851e-06	Down	Myl9	98932	myosin, light polypeptide 9, regulatory	Q9CQ19	K12755 MYL9; myosin regulatory light chain 9	mmu04022:cGMP-PKG signaling pathway;mmu04024:cAMP signaling pathway;mmu04270:Vascular smooth muscle contraction;mmu04360:Axon guidance;mmu04510:Focal adhesion;mmu04530:Tight junction;mmu04670:Leukocyte transendothelial migration;mmu04810:Regulation of actin cytoskeleton;mmu04921:Oxytocin signaling pathway;	GO:0005509;GO:0032036;GO:0046872;	NA	GO:0001725;GO:0016459;GO:0016460;GO:0030018;
ENSMUSG00000068114	4919	772.6	1173.06	0.601904	1.39837e-07	5.41911e-06	Up	Ccdc134	76457	coiled-coil domain containing 134	Q8C7V8	NA	NA	GO:0003674;	GO:0008150;	GO:0005576;GO:0005634;GO:0005737;GO:0005783;
ENSMUSG00000068196	5108	13803.7	8292.54	-0.735172	1.74696e-22	3.59656e-20	Down	Col8a1	12837	collagen, type VIII, alpha 1	Q00780	K23455 COL8A; collagen, type VIII, alpha	NA	GO:0005201;GO:0030020;	GO:0001525;GO:0007155;GO:0010811;GO:0030198;GO:0048593;GO:0050673;	GO:0005576;GO:0005581;GO:0005604;GO:0005615;GO:0005615;GO:0031012;GO:0062023;
ENSMUSG00000068231	12805	2.04487	75.7622	5.21363	0.000378325	0.00586448	Up	Vmn1r43	113847	vomeronasal 1 receptor 43	Q8VIC9	K04614 V1R; vomeronasal 1 receptor	NA	GO:0004930;GO:0005550;GO:0016503;GO:0038023;	GO:0007165;GO:0007186;GO:0007606;GO:0019236;	GO:0005886;GO:0005886;GO:0016020;GO:0016021;
ENSMUSG00000068614	1473	7470.76	4079.33	-0.872771	1.52045e-29	5.27194e-27	Down	Actc1	11464	actin, alpha, cardiac muscle 1	Q497E4	K12314 ACTC1; actin, alpha cardiac muscle	mmu04260:Cardiac muscle contraction;mmu04261:Adrenergic signaling in cardiomyocytes;mmu05410:Hypertrophic cardiomyopathy (HCM);mmu05414:Dilated cardiomyopathy (DCM);	GO:0000166;GO:0005515;GO:0005524;GO:0016887;GO:0017022;GO:0017022;GO:0000166;GO:0005515;GO:0005524;GO:0016887;GO:0017022;GO:0017022;	GO:0007015;GO:0030048;GO:0030240;GO:0031032;GO:0033275;GO:0033275;GO:0043066;GO:0055003;GO:0055008;GO:0060047;GO:0060047;GO:0060048;GO:0070252;GO:0007015;GO:0030048;GO:0030240;GO:0031032;GO:0033275;GO:0033275;GO:0043066;GO:0055003;GO:0055008;GO:0060047;GO:0060047;GO:0060048;GO:0070252;	GO:0005737;GO:0005856;GO:0005884;GO:0005884;GO:0030017;GO:0030017;GO:0031674;GO:0042643;GO:0045202;GO:0045202;GO:0098978;GO:0098978;GO:0005737;GO:0005856;GO:0005884;GO:0005884;GO:0030017;GO:0030017;GO:0031674;GO:0042643;GO:0045202;GO:0045202;GO:0098978;GO:0098978;
ENSMUSG00000068742	3976	325.964	665.912	1.03014	9.05455e-14	8.17142e-12	Up	Cry2	12953	cryptochrome 2 (photolyase-like)	Q9R194	K02295 CRY; cryptochrome	mmu04710:Circadian rhythm;	GO:0000166;GO:0000976;GO:0003677;GO:0003684;GO:0003697;GO:0005515;GO:0009881;GO:0019900;GO:0019901;GO:0019902;GO:0035257;GO:0071949;	GO:0000122;GO:0006606;GO:0007623;GO:0009416;GO:0009416;GO:0014823;GO:0018298;GO:0019915;GO:0032515;GO:0032868;GO:0032922;GO:0032922;GO:0042593;GO:0042752;GO:0042754;GO:0043153;GO:0045892;GO:0045892;GO:0045892;GO:0045892;GO:0048511;GO:0050896;GO:2000323;GO:2000850;	GO:0005634;GO:0005737;GO:0005739;GO:0005829;GO:0016607;
ENSMUSG00000068794	4230	57.8459	18.0995	-1.68342	0.000487965	0.00731447	Down	Col28a1	213945	collagen, type XXVIII, alpha 1	Q2UY11	K23619 COL28A; collagen type XXVIII alpha	mmu04974:Protein digestion and absorption;	GO:0004867;GO:0005201;GO:0030020;GO:0030414;	GO:0007155;GO:0010466;GO:0030198;	GO:0005576;GO:0005581;GO:0005604;GO:0005615;GO:0031012;GO:0062023;
ENSMUSG00000069421	4809	1327.75	388.37	-1.77238	2.30949e-52	2.17356e-49	Down	Olfr810	258543	olfactory receptor 810	Q8VFH9	K04257 OLFR; olfactory receptor	mmu04740:Olfactory transduction;	GO:0004984;GO:0004984;	GO:0007186;GO:0007608;	GO:0016021;
ENSMUSG00000069793	5769	125.725	62.8051	-0.996032	0.00402578	0.0406777	Down	Slfn9	237886	schlafen 9	Q8CB82	NA	NA	GO:0000049;GO:0000166;GO:0004518;GO:0004519;GO:0004521;GO:0005524;GO:0008270;GO:0016787;GO:0046872;GO:0000049;GO:0000166;GO:0004518;GO:0004519;GO:0004521;GO:0005524;GO:0008270;GO:0016787;GO:0046872;GO:0000049;GO:0000166;GO:0004518;GO:0004519;GO:0004521;GO:0005524;GO:0008270;GO:0016787;GO:0046872;	GO:0051607;GO:0051607;GO:0051607;	GO:0005634;GO:0005737;GO:0005634;GO:0005737;GO:0005634;GO:0005737;
ENSMUSG00000069910	2505	216.146	124.761	-0.792096	0.000291357	0.0047394	Down	Spdl1	70385	spindle apparatus coiled-coil protein 1	Q923A2	NA	NA	GO:0019899;GO:0043515;GO:0043515;	GO:0000132;GO:0000132;GO:0007049;GO:0007080;GO:0007080;GO:0007094;GO:0034501;GO:0034501;GO:0051301;	GO:0000775;GO:0000776;GO:0000922;GO:0000922;GO:0000940;GO:0000940;GO:0005634;GO:0005694;GO:0005737;GO:0005856;
ENSMUSG00000071540	5547	34.9427	104.516	1.57853	2.53524e-06	7.30947e-05	Up	3425401B19Rik	100504518	RIKEN cDNA 3425401B19 gene	D3Z1D3	NA	NA	GO:0003674;	GO:0070886;GO:0070886;	GO:0005737;GO:0030018;GO:0030018;
ENSMUSG00000071552	919	137.077	70.2974	-0.961836	0.000210863	0.00362234	Down	Tigit	100043314	T cell immunoreceptor with Ig and ITIM domains	A0A0B4J1G6	K16350 TIGIT; T-cell immunoreceptor with Ig and ITIM domains	mmu04514:Cell adhesion molecules (CAMs);	GO:0005102;GO:0005102;GO:0005102;GO:0005515;GO:0042802;	GO:0032695;GO:0032695;GO:0032695;GO:0032733;GO:0032733;GO:0032733;GO:0050868;GO:0050868;GO:0050868;GO:0050868;	GO:0009986;GO:0009986;GO:0009986;
ENSMUSG00000071637	3746	627.339	337.668	-0.894817	8.10683e-11	5.53449e-09	Down	Cebpd	12609	CCAAT/enhancer binding protein (C/EBP), delta	Q3UE64	K10050 CEBPD; CCAAT/enhancer binding protein (C/EBP), delta	NA	GO:0000978;GO:0000978;GO:0001228;GO:0001228;GO:0003677;GO:0003700;GO:0005515;GO:0042803;GO:0043565;GO:0044212;GO:0046982;GO:0000978;GO:0000978;GO:0001228;GO:0001228;GO:0003677;GO:0003700;GO:0005515;GO:0042803;GO:0043565;GO:0044212;GO:0046982;GO:0000978;GO:0000978;GO:0001228;GO:0001228;GO:0003677;GO:0003700;GO:0005515;GO:0042803;GO:0043565;GO:0044212;GO:0046982;	GO:0002244;GO:0006355;GO:0006357;GO:0045444;GO:0045444;GO:0045669;GO:0045892;GO:0045944;GO:0045944;GO:0048839;GO:0002244;GO:0006355;GO:0006357;GO:0045444;GO:0045444;GO:0045669;GO:0045892;GO:0045944;GO:0045944;GO:0048839;GO:0002244;GO:0006355;GO:0006357;GO:0045444;GO:0045444;GO:0045669;GO:0045892;GO:0045944;GO:0045944;GO:0048839;	GO:0005634;GO:0005634;GO:0005654;GO:0005634;GO:0005634;GO:0005654;GO:0005634;GO:0005634;GO:0005654;
ENSMUSG00000071713	4900	1328.41	442.782	-1.58386	1.84646e-45	1.52056e-42	Down	Csf2rb	12983	colony stimulating factor 2 receptor, beta, low-affinity (granulocyte-macrophage)	P26955	K04738 CSF2RB; cytokine receptor common subunit beta	mmu04060:Cytokine-cytokine receptor interaction;mmu04210:Apoptosis;mmu04630:JAK-STAT signaling pathway;mmu05200:Pathways in cancer;	GO:0004896;GO:0005515;	GO:0001558;GO:0019221;	GO:0016020;GO:0016021;
ENSMUSG00000072437	3928	65.0493	27.289	-1.25495	0.0010539	0.0136675	Down	Nanos1	332397	nanos C2HC-type zinc finger 1	Q80WY3	K18741 NANOS1; protein nanos 1	NA	GO:0003674;GO:0003723;GO:0008270;GO:0046872;	GO:0001558;GO:0001894;GO:0006417;GO:0010608;GO:0010608;GO:0010631;GO:0016477;GO:0017148;GO:0098749;GO:1900153;	GO:0005737;GO:0048471;
ENSMUSG00000072905	1766	537.736	339.39	-0.665082	8.97192e-06	0.000229097	Down	Gm2016	100039042	predicted gene 2016	Q3TQZ4	NA	NA	GO:0003674;	GO:0008150;	GO:0005575;
ENSMUSG00000073530	9518	332.922	168.302	-0.984814	3.32943e-07	1.1986e-05	Down	Pappa2	23850	pappalysin 2	Q8BJG6	K08647 PAPPA2; pappalysin-2 [EC:3.4.24.-]	NA	GO:0004222;GO:0008237;GO:0004222;GO:0008237;GO:0004222;GO:0008237;	GO:0006508;GO:0060349;GO:0006508;GO:0060349;GO:0006508;GO:0060349;	GO:0005829;GO:0016324;GO:0005829;GO:0016324;GO:0005829;GO:0016324;
ENSMUSG00000073600	4888	150.01	317.136	1.07925	3.82191e-06	0.000106239	Up	Prob1	381148	proline rich basic protein 1	Q3UKG2	NA	NA	GO:0003674;GO:0003674;	GO:0008150;GO:0008150;	GO:0005575;GO:0005575;
ENSMUSG00000074195	2997	17.2788	0.672609	-4.72253	0.000357037	0.00562046	Down	Clca4b	99709	chloride channel accessory 4B	Q3UW98	K05030 CLCA3_4; calcium-activated chloride channel regulator 3/4	mmu04924:Renin secretion;mmu04972:Pancreatic secretion;	GO:0005229;	NA	GO:0005887;
ENSMUSG00000074207	1492	32.4226	124.035	1.93774	4.24555e-07	1.48775e-05	Up	Adh1	11522	alcohol dehydrogenase 1 (class I)	Q3UKA4	K13951 ADH1_7; alcohol dehydrogenase 1/7 [EC:1.1.1.1]	mmu00010:Glycolysis / Gluconeogenesis;mmu00071:Fatty acid degradation;mmu00350:Tyrosine metabolism;mmu00830:Retinol metabolism;mmu00980:Metabolism of xenobiotics by cytochrome P450;mmu00982:Drug metabolism - cytochrome P450;mmu01100:Metabolic pathways;mmu05204:Chemical carcinogenesis;	GO:0004022;GO:0004022;GO:0004022;GO:0004024;GO:0004745;GO:0004745;GO:0008144;GO:0008270;GO:0016491;GO:0035276;GO:0042803;GO:0046872;GO:0051287;GO:0004022;GO:0004022;GO:0004022;GO:0004024;GO:0004745;GO:0004745;GO:0008144;GO:0008270;GO:0016491;GO:0035276;GO:0042803;GO:0046872;GO:0051287;	GO:0001523;GO:0006068;GO:0006068;GO:0006069;GO:0006069;GO:0032526;GO:0033574;GO:0042572;GO:0042572;GO:0042572;GO:0042573;GO:0042573;GO:0042573;GO:0046186;GO:0048149;GO:0048545;GO:0055114;GO:0001523;GO:0006068;GO:0006068;GO:0006069;GO:0006069;GO:0032526;GO:0033574;GO:0042572;GO:0042572;GO:0042572;GO:0042573;GO:0042573;GO:0042573;GO:0046186;GO:0048149;GO:0048545;GO:0055114;	GO:0005654;GO:0005737;GO:0005739;GO:0005829;GO:0005829;GO:0005886;GO:0005654;GO:0005737;GO:0005739;GO:0005829;GO:0005829;GO:0005886;
ENSMUSG00000074217	1351	81.6266	40.1512	-1.02373	0.00285533	0.0306367	Down	2210011C24Rik	70134	RIKEN cDNA 2210011C24 gene	Q9CVC4	NA	NA	GO:0003674;GO:0003674;	GO:0008150;GO:0008150;	GO:0005575;GO:0005575;
ENSMUSG00000074794	4132	639.24	1365.95	1.0948	5.53378e-08	2.25737e-06	Up	Arrdc3	105171	arrestin domain containing 3	Q7TPQ9	NA	NA	GO:0031699;	GO:0001659;GO:0031651;GO:0043588;GO:0051443;GO:0060613;GO:0071878;GO:0090327;GO:0120163;	GO:0005737;GO:0005764;GO:0005768;GO:0005886;GO:0016020;
ENSMUSG00000074818	3265	33.5186	82.6615	1.2999	0.000510017	0.00756755	Up	Pdzd7	100503041	PDZ domain containing 7	E9Q9W7	K21882 PDZD7; PDZ domain-containing protein 7	NA	GO:0005515;GO:0042803;GO:0046982;	GO:0007605;GO:0045184;GO:0050910;GO:0060088;GO:0060088;GO:0060117;	GO:0001917;GO:0002141;GO:0002141;GO:0002142;GO:0002142;GO:0005634;GO:0005886;GO:0005929;GO:0032391;GO:0032420;GO:0032420;GO:0032426;GO:0042995;GO:1990696;
ENSMUSG00000074934	4148	21040.1	11801.7	-0.834159	6.00682e-30	2.1985e-27	Down	Grem1	23892	gremlin 1, DAN family BMP antagonist	Q3UY25	K23318 GREM; gremlin	mmu04350:TGF-beta signaling pathway;	GO:0005125;GO:0030297;GO:0036122;GO:0042803;GO:0043184;GO:0043395;GO:0048018;GO:0005125;GO:0030297;GO:0036122;GO:0042803;GO:0043184;GO:0043395;GO:0048018;GO:0005125;GO:0030297;GO:0036122;GO:0042803;GO:0043184;GO:0043395;GO:0048018;	GO:0000902;GO:0001525;GO:0001658;GO:0002042;GO:0002092;GO:0002689;GO:0003257;GO:0003337;GO:0007165;GO:0007267;GO:0008284;GO:0009887;GO:0009954;GO:0010717;GO:0030199;GO:0030308;GO:0030326;GO:0030502;GO:0030514;GO:0030514;GO:0032331;GO:0033689;GO:0043066;GO:0043542;GO:0045668;GO:0045766;GO:0045766;GO:0045892;GO:0045893;GO:0045944;GO:0046851;GO:0048263;GO:0051092;GO:0051893;GO:0051973;GO:0060173;GO:…	GO:0005576;GO:0005615;GO:0005615;GO:0009986;GO:0009986;GO:0005576;GO:0005615;GO:0005615;GO:0009986;GO:0009986;GO:0005576;GO:0005615;GO:0005615;GO:0009986;GO:0009986;
ENSMUSG00000074971	2267	692.143	1208.94	0.804447	5.247e-15	5.31804e-13	Up	Fibin	67606	fin bud initiation factor homolog (zebrafish)	Q9CQS3	NA	NA	GO:0042803;	GO:0008150;GO:0010042;GO:0070528;GO:0071548;	GO:0005576;GO:0005783;GO:0005794;
ENSMUSG00000075602	955	2932.28	4971.12	0.761299	4.60701e-08	1.8991e-06	Up	Ly6a	110454	lymphocyte antigen 6 complex, locus A	P05533	K06846 LY6D_E_G6_H; lymphocyte antigen 6 complex locus protein D/E/G6/H	NA	GO:0005515;	GO:0009617;	GO:0005886;GO:0009897;GO:0016020;GO:0031225;
ENSMUSG00000076441	1696	631.181	275.29	-1.19686	1.11615e-09	6.28481e-08	Down	Ass1	11898	argininosuccinate synthetase 1	Q3UJ34	K01940 argG; argininosuccinate synthase [EC:6.3.4.5]	mmu00220:Arginine biosynthesis;mmu00250:Alanine, aspartate and glutamate metabolism;mmu01100:Metabolic pathways;mmu01230:Biosynthesis of amino acids;mmu05418:Fluid shear stress and atherosclerosis;	GO:0000166;GO:0004055;GO:0004055;GO:0005515;GO:0005524;GO:0015643;GO:0016597;GO:0016874;GO:0042802;GO:0000166;GO:0004055;GO:0004055;GO:0005515;GO:0005524;GO:0015643;GO:0016597;GO:0016874;GO:0042802;	GO:0000050;GO:0000050;GO:0000052;GO:0000053;GO:0000053;GO:0006526;GO:0006526;GO:0006531;GO:0007623;GO:0007623;GO:0008652;GO:0010043;GO:0010046;GO:0045429;GO:0051384;GO:0071499;GO:1903038;GO:0000050;GO:0000050;GO:0000052;GO:0000053;GO:0000053;GO:0006526;GO:0006526;GO:0006531;GO:0007623;GO:0007623;GO:0008652;GO:0010043;GO:0010046;GO:0045429;GO:0051384;GO:0071499;GO:1903038;	GO:0005634;GO:0005737;GO:0005737;GO:0005739;GO:0005741;GO:0005764;GO:0005783;GO:0005829;GO:0043005;GO:0043025;GO:0043204;GO:0043209;GO:0070852;GO:0005634;GO:0005737;GO:0005737;GO:0005739;GO:0005741;GO:0005764;GO:0005783;GO:0005829;GO:0043005;GO:0043025;GO:0043204;GO:0043209;GO:0070852;
ENSMUSG00000078606	9007	1343.76	865.382	-0.63433	2.08731e-06	6.22225e-05	Down	Gm4070	100042856	predicted gene 4070	Q80SU7	NA	NA	GO:0003674;	GO:0008150;	GO:0005575;
ENSMUSG00000078921	2810	43.4417	15.5396	-1.49104	0.004513	0.0444087	Down	Tgtp2	100039796	T cell specific GTPase 2	Q62293	NA	NA	GO:0003924;GO:0003924;	GO:0006952;GO:0035458;GO:0006952;GO:0035458;	GO:0005789;GO:0005789;
ENSMUSG00000078937	2895	14.5713	66.4803	2.18618	0.000109112	0.00205968	Up	Cpt1b	12895	carnitine palmitoyltransferase 1b, muscle	Q924X2	K19523 CPT1B; carnitine O-palmitoyltransferase 1, muscle isoform [EC:2.3.1.21]	mmu00071:Fatty acid degradation;mmu01212:Fatty acid metabolism;mmu03320:PPAR signaling pathway;mmu04152:AMPK signaling pathway;mmu04714:Thermogenesis;mmu04920:Adipocytokine signaling pathway;mmu04922:Glucagon signaling pathway;mmu04931:Insulin resistance;	GO:0004095;GO:0004095;GO:0004095;GO:0016740;GO:0016746;	GO:0006629;GO:0006631;GO:0009437;GO:0015909;GO:0015909;GO:0015909;	GO:0005739;GO:0005739;GO:0005739;GO:0005741;GO:0016020;GO:0016021;GO:0043231;
ENSMUSG00000079034	1873	492.628	80.5918	-2.61778	1.54045e-39	8.82475e-37	Down	Gm8300	666806	predicted gene 8300	Q3UTA4	NA	NA	GO:0003674;	GO:0008150;	GO:0005575;
ENSMUSG00000079362	4310	15.6845	67.2423	2.10452	6.28938e-05	0.00127295	Up	NA	NA	NA	NA	NA	NA	NA	NA	NA
ENSMUSG00000079428	971	351.953	199.766	-0.819104	4.53818e-05	0.000962883	Down	Tceal7	100040972	transcription elongation factor A (SII)-like 7	A3KGA4	NA	NA	GO:0050699;	GO:0032088;GO:0045892;	GO:0005634;GO:0005634;
ENSMUSG00000079592	1365	372.253	220.835	-0.753031	0.000658201	0.00931521	Down	C1qtnf5	235312	C1q and tumor necrosis factor related protein 5	Q8K480	NA	NA	GO:0042802;GO:0042802;GO:0042802;	GO:0009306;GO:0048839;GO:0070206;GO:0009306;GO:0048839;GO:0070206;GO:0009306;GO:0048839;GO:0070206;	GO:0005576;GO:0005615;GO:0005615;GO:0005886;GO:0005886;GO:0005923;GO:0016020;GO:0016324;GO:0016328;GO:0030133;GO:0042995;GO:0042995;GO:0005576;GO:0005615;GO:0005615;GO:0005886;GO:0005886;GO:0005923;GO:0016020;GO:0016324;GO:0016328;GO:0030133;GO:0042995;GO:0042995;GO:0005576;GO:0005615;GO:0005615;GO:0005886;GO:0005886;GO:0005923;GO:0016020;GO:0016324;GO:0016328;GO:0030133;GO:0042995;GO:0042995;
ENSMUSG00000087364	2837	152.427	90.3598	-0.751163	0.00436012	0.0431236	Down	NA	NA	NA	NA	NA	NA	NA	NA	NA
ENSMUSG00000089774	10913	2102.63	3373.3	0.682197	2.3131e-09	1.21424e-07	Up	Slc5a3	53881	solute carrier family 5 (inositol transporters), member 3	Q9JKZ2	K14383 SLC5A3; solute carrier family 5 (sodium/myo-inositol cotransporter), member 3	NA	GO:0005412;GO:0015293;GO:0022857;GO:0005412;GO:0015293;GO:0022857;	GO:0006020;GO:0006020;GO:0006811;GO:0006814;GO:0007422;GO:0015798;GO:0015798;GO:0043576;GO:0055085;GO:0006020;GO:0006020;GO:0006811;GO:0006814;GO:0007422;GO:0015798;GO:0015798;GO:0043576;GO:0055085;	GO:0005886;GO:0016020;GO:0016021;GO:0005886;GO:0016020;GO:0016021;
ENSMUSG00000090231	2751	188.609	107.332	-0.809703	0.000294314	0.0047816	Down	Cfb	14962	complement factor B	Q3UEG8	K01335 CFB; complement factor B [EC:3.4.21.47]	mmu04610:Complement and coagulation cascades;mmu05150:Staphylococcus aureus infection;	GO:0004252;GO:0008233;GO:0008236;GO:0016787;GO:0004252;GO:0008233;GO:0008236;GO:0016787;GO:0004252;GO:0008233;GO:0008236;GO:0016787;	GO:0002376;GO:0006508;GO:0006956;GO:0006957;GO:0006957;GO:0008283;GO:0045087;GO:0097066;GO:0002376;GO:0006508;GO:0006956;GO:0006957;GO:0006957;GO:0008283;GO:0045087;GO:0097066;GO:0002376;GO:0006508;GO:0006956;GO:0006957;GO:0006957;GO:0008283;GO:0045087;GO:0097066;	GO:0005576;GO:0005615;GO:0005576;GO:0005615;GO:0005576;GO:0005615;
ENSMUSG00000090362	10586	120.557	56.8233	-1.08365	0.000119778	0.0022291	Down	Vmn2r79	621430	vomeronasal 2, receptor 79	E9Q067	K04613 V2R; vomeronasal 2 receptor	NA	GO:0004930;GO:0038023;	GO:0008150;	GO:0005887;
ENSMUSG00000090958	4576	825.44	422.538	-0.966536	3.56162e-17	4.46932e-15	Down	Lrrc32	434215	leucine rich repeat containing 32	G3XA59	NA	NA	GO:0019838;GO:0050431;GO:0050431;	GO:0007179;GO:0010628;GO:0046007;GO:0050710;GO:0062009;GO:1901388;GO:1901398;	GO:0005615;GO:0005654;GO:0005886;GO:0009986;GO:0016020;GO:0016021;GO:0031012;
ENSMUSG00000091405	1630	29.0829	66.9916	1.20018	0.00397883	0.0403155	Up	Hist2h4	97122	histone cluster 2, H4	P62806	K11254 H4; histone H4	mmu05034:Alcoholism;mmu05203:Viral carcinogenesis;mmu05322:Systemic lupus erythematosus;	GO:0003677;GO:0005515;GO:0019904;GO:0003677;GO:0005515;GO:0019904;	GO:0006334;GO:0006334;GO:0006335;GO:0006336;GO:0045653;GO:0051290;GO:0006334;GO:0006334;GO:0006335;GO:0006336;GO:0045653;GO:0051290;	GO:0000228;GO:0000786;GO:0000788;GO:0005634;GO:0005634;GO:0032991;GO:0000228;GO:0000786;GO:0000788;GO:0005634;GO:0005634;GO:0032991;
ENSMUSG00000093930	3464	13530.9	22437	0.729604	2.28247e-24	5.67431e-22	Up	Hmgcs1	208715	3-hydroxy-3-methylglutaryl-Coenzyme A synthase 1	Q8JZK9	K01641 E2.3.3.10; hydroxymethylglutaryl-CoA synthase [EC:2.3.3.10]	mmu00072:Synthesis and degradation of ketone bodies;mmu00280:Valine, leucine and isoleucine degradation;mmu00650:Butanoate metabolism;mmu00900:Terpenoid backbone biosynthesis;mmu01100:Metabolic pathways;mmu03320:PPAR signaling pathway;	GO:0003824;GO:0004421;GO:0004421;GO:0008144;GO:0016740;GO:0016853;GO:0042803;GO:0043177;	GO:0006084;GO:0006629;GO:0006694;GO:0006695;GO:0008202;GO:0008203;GO:0008299;GO:0010142;GO:0014074;GO:0016126;GO:0071404;	GO:0005737;GO:0005829;GO:0005829;
ENSMUSG00000093938	1858	29.7337	4.23581	-2.81382	0.00154707	0.0190199	Down	Evi2b	216984	ecotropic viral integration site 2b	Q8VD58	K16854 EVI2B; ecotropic viral integration site 2B protein	NA	GO:0003674;	GO:0008150;	NA
ENSMUSG00000095799	435	787.484	481.856	-0.709847	1.04258e-06	3.31811e-05	Down	NA	NA	NA	NA	NA	NA	NA	NA	NA
ENSMUSG00000096619	435	102.441	34.6875	-1.56328	1.63239e-05	0.000393205	Down	NA	NA	NA	NA	NA	NA	NA	NA	NA
ENSMUSG00000097075	2022	13.5055	1.37401	-3.34328	0.00435097	0.0431236	Down	Cdiptos	381922	CDIP transferase, opposite strand	NA	NA	NA	GO:0003674;	GO:0008150;	GO:0005575;
ENSMUSG00000099913	3142	29.6908	165.744	2.48308	6.01819e-06	0.000157959	Up	NA	NA	NA	NA	NA	NA	NA	NA	NA
ENSMUSG00000104713	4243	5.4779	35.3464	2.69647	0.000543125	0.00794252	Up	Gbp6	100702	guanylate binding protein 6	Q3U8G5	K20908 GBP6; guanylate-binding protein 6	NA	GO:0003924;GO:0005525;GO:0003924;GO:0005525;	GO:0009617;GO:0035458;GO:0042832;GO:0042832;GO:0044406;GO:0050830;GO:0050830;GO:0050830;GO:0071222;GO:0071346;GO:0071346;GO:0009617;GO:0035458;GO:0042832;GO:0042832;GO:0044406;GO:0050830;GO:0050830;GO:0050830;GO:0071222;GO:0071346;GO:0071346;	GO:0020005;GO:0020005;GO:0031410;GO:0031410;GO:0020005;GO:0020005;GO:0031410;GO:0031410;
ENSMUSG00000105096	3528	4.44801	43.2006	3.28771	7.30439e-06	0.000187974	Up	Gbp10	626578	guanylate-binding protein 10	Q000W5	K20908 GBP6; guanylate-binding protein 6	NA	GO:0003924;GO:0005525;	GO:0042832;GO:0042832;GO:0050830;GO:0050830;GO:0050830;GO:0071222;GO:0071346;GO:0071346;	GO:0020005;GO:0031410;GO:0031410;
ENSMUSG00000107068	4373	175.061	337.97	0.947603	0.00483399	0.0468329	Up	Pagr1a	67278	PAXIP1 associated glutamate rich protein 1A	Q99L02	K14973 PA1; PAXIP1-associated protein 1	NA	GO:0005515;GO:0030331;GO:0030331;	GO:0033148;GO:0033148;GO:0045944;GO:0048304;GO:0051568;GO:0060717;GO:0071557;GO:1902749;GO:1902808;GO:1902808;GO:2001022;	GO:0005634;GO:0035097;GO:0035097;GO:0044666;GO:0044666;
ENSMUSG00000109941	1326	31.3273	104.43	1.73849	1.26583e-06	3.93361e-05	Up	Exosc6	72544	exosome component 6	Q8BTW3	K12587 MTR3; exosome complex component MTR3	mmu03018:RNA degradation;	GO:0003723;	GO:0006364;GO:0016075;GO:0034427;GO:0034475;GO:0045006;GO:0045190;GO:0045830;GO:0071028;GO:0071051;	GO:0000176;GO:0000177;GO:0000178;GO:0005634;GO:0005730;GO:0005737;
ENSMUSG00000110266	8516	44.5913	11.0957	-2.01075	0.000365275	0.00572278	Down	Gm32742	102635385	predicted gene, 32742	NA	NA	NA	NA	NA	NA
ENSMUSG00000110344	2031	23.3239	68.835	1.56029	0.000602836	0.0087259	Up	NA	NA	NA	NA	NA	NA	NA	NA	NA
ENSMUSG00000110723	724	14.3589	0	-6.32238	6.97889e-05	0.00139113	Down	NA	NA	NA	NA	NA	NA	NA	NA	NA
ENSMUSG00000113201	435	55.5592	24.2954	-1.19385	0.00443006	0.0436578	Down	Gm21936	100861898	predicted gene, 21936	A0A1Y7VJE9	NA	NA	NA	NA	NA
ENSMUSG00000113971	435	59.3475	17.8892	-1.73225	0.00022228	0.00378393	Down	Gm2022	100039052	predicted pseudogene 2022	A0A1Y7VLT7	NA	NA	NA	NA	NA
ENSMUSG00000115018	2045	15.8791	290.544	4.19333	0.00168294	0.0203184	Up	NA	NA	NA	NA	NA	NA	NA	NA	NA
ENSMUSG00000115388	12332	109.84	200.123	0.86429	0.000426162	0.0065292	Up	Eppk1	223650	epiplakin 1	Q8R0W0	NA	NA	GO:0005198;GO:0008092;GO:0019215;GO:1990254;GO:1990254;	GO:0007010;GO:0010839;GO:0030336;GO:0030856;GO:0042060;GO:0042060;GO:0045104;GO:0045109;GO:0045109;GO:0045109;GO:0045110;GO:0045110;GO:0050680;GO:0051548;GO:0060054;GO:0061045;GO:0061045;GO:1905041;	GO:0005737;GO:0005737;GO:0005856;GO:0005856;GO:0005882;GO:0005886;GO:0005911;GO:0005923;GO:0016020;GO:0016327;GO:0030054;GO:0030056;GO:0042995;GO:0045095;GO:0045095;GO:0045095;GO:0045111;GO:0045178;GO:0071944;GO:0097356;
ENSMUSG00000117942	2235	368.273	640.156	0.796459	0.00420238	0.0421069	Up	NA	NA	NA	NA	NA	NA	NA	NA	NA
ENSMUSG00000054568	2656	3.02717	22.4721	2.88774	0.00158485	0.0193378	Up	Usp17la	13531	ubiquitin specific peptidase 17-like A	Q61068	K11845 USP17; ubiquitin carboxyl-terminal hydrolase 17 [EC:3.4.19.12]	NA	GO:0004197;GO:0004843;GO:0004843;GO:0008233;GO:0008234;GO:0016787;GO:0036459;	GO:0006511;GO:0016579;GO:0016579;GO:0042981;	NA
ENSMUSG00000074183	875	2.68682	26.8497	3.31301	8.38973e-05	0.00164744	Up	Gsta1	14857	glutathione S-transferase, alpha 1 (Ya)	P13745	K00799 GST; glutathione S-transferase [EC:2.5.1.18]	mmu00480:Glutathione metabolism;mmu00980:Metabolism of xenobiotics by cytochrome P450;mmu00982:Drug metabolism - cytochrome P450;mmu00983:Drug metabolism - other enzymes;mmu01100:Metabolic pathways;mmu01524:Platinum drug resistance;mmu05200:Pathways in cancer;mmu05204:Chemical carcinogenesis;mmu05225:Hepatocellular carcinoma;mmu05418:Fluid shear stress and atherosclerosis;	GO:0004364;GO:0004364;GO:0004364;GO:0043295;	GO:0006749;GO:0006749;GO:0006805;GO:0009617;GO:0035634;	GO:0005829;GO:0005829;
ENSMUSG00000078881	1497	2.00613	275.899	7.09637	4.90069e-08	2.00533e-06	Up	Gm14434	668039	predicted gene 14434	A2ART4	K09228 KRAB; KRAB domain-containing zinc finger protein	mmu05168:Herpes simplex virus 1 infection;	GO:0003700;GO:0043565;	GO:0045892;GO:0045893;GO:0045944;	GO:0005634;GO:0005654;
ENSMUSG00000079363	4538	3.36452	43.0236	3.67214	2.56866e-06	7.37357e-05	Up	Gbp4	17472	guanylate binding protein 4	Q5DTF3	K20908 GBP6; guanylate-binding protein 6	NA	GO:0005515;GO:0005515;GO:0005515;	GO:0000122;GO:0001933;GO:0031397;GO:0032687;GO:0042308;GO:0050688;GO:0071346;GO:0000122;GO:0001933;GO:0031397;GO:0032687;GO:0042308;GO:0050688;GO:0071346;GO:0000122;GO:0001933;GO:0031397;GO:0032687;GO:0042308;GO:0050688;GO:0071346;	NA
ENSMUSG00000028457	4706	0.674702	11.7559	4.12022	0.00428305	0.0425592	Up	Atp8b5	320571	ATPase, class I, type 8B, member 5	A3FIN4	K01530 E7.6.2.1; phospholipid-translocating ATPase [EC:7.6.2.1]	NA	GO:0000166;GO:0000287;GO:0004012;GO:0005524;GO:0005548;GO:0046872;	GO:0006869;GO:0007030;GO:0007030;GO:0015914;GO:0045332;	GO:0001669;GO:0005794;GO:0005886;GO:0016020;GO:0016021;GO:0031410;
ENSMUSG00000093954	3593	0	84.2694	8.81401	1.2915e-12	1.06355e-10	Up	Gm16867	100862085	predicted gene, 16867	NA	NA	NA	NA	NA	NA

## Sheet: volcano M D2HG+D2hgdh vs D2hgdh
	FC	log2(FC)	raw.pval	#NAME?
NADPH	0.41032	-1.2852	0.0024492	2.611
Creatinine	0.4502	-1.1514	0.0020056	2.6978
NAD	0.49035	-1.0281	0.0015161	2.8193
NADH	2.079	1.0559	0.0066125	2.1796
Lactate	2.188	1.1296	0.11099	0.95472
3-Methylhistidine	2.4302	1.2811	7.4509e-05	4.1278
Carnitine	3.526	1.818	0.00069893	3.1556
2-Hydroxyglutarate	5.178	2.3724	9.8143e-05	4.0081

## Sheet: Sheet2
	matched_features
Drug metabolism - cytochrome P450	mmu:14261; mmu:14857; mmu:14860; mmu:14862; mmu:56615; mmu:11522; mmu:11529; mmu:11670; mmu:11761
Terpenoid backbone biosynthesis	mmu:17855; mmu:110460; mmu:208715; mmu:15357; mmu:192156; mmu:68603; mmu:110196
One carbon pool by folate	mmu:17768; mmu:107747; mmu:216188; mmu:270685; mmu:13361; mmu:108037
Butanoate metabolism	cpd:C02630; mmu:67041; mmu:208715; mmu:110460; mmu:268860
Retinol metabolism	mmu:11522; mmu:11529; mmu:11761; mmu:232174; mmu:20148; mmu:241452
Synthesis and degradation of ketone bodies	mmu:208715; mmu:110460; mmu:67041
Pyruvate metabolism	cpd:C00256; mmu:74551; mmu:60525; mmu:56752; mmu:110460; mmu:66204
Glycolysis or Gluconeogenesis	mmu:56752; mmu:11670; mmu:11522; mmu:11529; mmu:11676; mmu:74551; mmu:60525
Steroid biosynthesis	mmu:13360; mmu:74754; mmu:73166; mmu:16987; mmu:18194; mmu:66234; mmu:15490; mmu:20775
Valine, leucine and isoleucine degradation	mmu:110460; mmu:208715; mmu:67041; mmu:12035; mmu:52538; mmu:11761; mmu:56752; mmu:268860
Glutathione metabolism	cpd:C00005; mmu:14857; mmu:14860; mmu:14862; mmu:56615; mmu:69065
Metabolism of xenobiotics by cytochrome P450	mmu:13078; mmu:14857; mmu:14860; mmu:14862; mmu:56615; mmu:11670; mmu:11522; mmu:11529; mmu:13849
Histidine metabolism	cpd:C01152; mmu:56752; mmu:11670; mmu:11484
Fatty acid degradation	mmu:110460; mmu:52538; mmu:11522; mmu:11529; mmu:56752; mmu:94180; mmu:12894; mmu:12895
Drug metabolism - other enzymes	mmu:22436; mmu:21877; mmu:14857; mmu:14860; mmu:14862; mmu:56615
Cysteine and methionine metabolism	mmu:107869; mmu:232087; mmu:12035; mmu:107272; mmu:236539
Glycine, serine and threonine metabolism	mmu:236539; mmu:107869; mmu:107272; mmu:100678; mmu:108037
Glycerolipid metabolism	mmu:64899; mmu:56752; mmu:16956
Alanine, aspartate and glutamate metabolism	mmu:11484; mmu:27053; mmu:11898; mmu:268860
Vitamin B6 metabolism	mmu:107272; mmu:11761
beta-Alanine metabolism	mmu:268860; mmu:56752; mmu:11670
Glycosaminoglycan biosynthesis - heparan sulfate / heparin	mmu:56219
Propanoate metabolism	mmu:60525; mmu:268860; mmu:110460
Phosphonate and phosphinate metabolism	mmu:68671
Nitrogen metabolism	mmu:12353
Glyoxylate and dicarboxylate metabolism	mmu:110460; mmu:108037; mmu:60525
Tryptophan metabolism	mmu:13078; mmu:110460; mmu:56752; mmu:11761
Valine, leucine and isoleucine biosynthesis	mmu:12035
Tyrosine metabolism	mmu:11670; mmu:11522; mmu:11529; mmu:11761
Citrate cycle (TCA cycle)	mmu:104112; mmu:74551
Nicotinate and nicotinamide metabolism	cpd:C00003; mmu:11761
Ascorbate and aldarate metabolism	mmu:56752
Fatty acid elongation	mmu:52538; mmu:171210; mmu:170439
Lysine degradation	mmu:56752; mmu:110460
Arginine and proline metabolism	mmu:12715; mmu:56752; mmu:209027
Caffeine metabolism	mmu:22436
alpha-Linolenic acid metabolism	mmu:56473
Mucin type O-glycan biosynthesis	mmu:207839
Phenylalanine metabolism	mmu:11670
Arginine biosynthesis	mmu:11898
Pantothenate and CoA biosynthesis	mmu:12035
Selenocompound metabolism	mmu:107869
Various types of N-glycan biosynthesis	mmu:14595
Starch and sucrose metabolism	mmu:14936
Fructose and mannose metabolism	mmu:11676
Phosphatidylinositol signaling system	mmu:234515; mmu:271424
Ether lipid metabolism	mmu:18606
Glycerophospholipid metabolism	mmu:68671; mmu:64899
Pentose phosphate pathway	mmu:11676
Biosynthesis of unsaturated fatty acids	mmu:171210
Galactose metabolism	mmu:14595
Purine metabolism	mmu:22436; mmu:18574; mmu:110385; mmu:104111
Folate biosynthesis	mmu:13361
Inositol phosphate metabolism	mmu:234515
N-Glycan biosynthesis	mmu:14595
Fatty acid biosynthesis	mmu:14104; mmu:94180
Steroid hormone biosynthesis	mmu:56448; mmu:15490; mmu:13078
Pyrimidine metabolism	mmu:21877
Glycosphingolipid biosynthesis - lacto and neolacto series	mmu:14595
