# Supplementary material for: Oncometabolite D-2-hydroxyglutarate - dependent metabolic reprogramming induces skeletal muscle atrophy during cancer cachexia
Source: Research Square preprint supplement (doi:10.21203/rs.3.rs-1246702/v1), 2022-01-27
Supplement: Supplementary file 10 [file e56754068c3fe3d392c0c15e.xlsx]

## Sheet: Sheet1
	Compound	CAS Number	formula	Molecular weight	Product code	Manufacturer	Concentration（μM）	Molecular weight（g/mol）	Reference
Succinate	Disodium succinate	‘150-90-3	NaOOCCH2CH2COONa	162.05	W327700	Sigmaaldrich	50	118.09	Neuzil, Jiri, et al. "α-Tocopheryl succinate-induced apoptosis in Jurkat T cells involves caspase-3 activation, and both lysosomal and mitochondrial destabilisation." FEBS letters 445.2-3 (1999): 295-300.
Fumarate	Sodium fumarate dibasic	‘17013-01-3	NaOOCCH=CHCOONa	160.04	F1506	Sigmaaldrich	50	116.07	Haas, Benjamin, et al. "Permanent culture of macrophages at physiological oxygen attenuates the antioxidant and immunomodulatory properties of dimethyl fumarate." Journal of cellular physiology 230.5 (2015): 1128-1138.
Lactate	Sodium L-lactate	‘867-56-1	C3H5NaO3	112.06	L7022	Sigmaaldrich	500	90.08	Galardo, María Noel, et al. "Lactate regulates rat male germ cell function through reactive oxygen species." PloS one 9.1 (2014): e88024.
D-2-Hydroxyglutarate	D-α-Hydroxyglutaric acid disodium salt	‘103404-90-6	C5H6O5Na2	192.08	H8378	Sigmaaldrich	93	148.114	Fan, Jing, et al. "Human phosphoglycerate dehydrogenase produces the oncometabolite D-2-hydroxyglutarate." ACS chemical biology 10.2 (2015): 510-516.
Pyruvate	Sodium pyruvate	‘113-24-6	CH3COCOONa	110.04	P2256	Sigmaaldrich	1000	88.06	Wang, Xiaofei, et al. "Pyruvate protects mitochondria from oxidative stress in human neuroblastoma SK-N-SH cells." Brain research 1132 (2007): 1-9.
Adenosine	Adenosine	‘58-61-7	C10H13N5O4	267.24	A4036	Sigmaaldrich	10	267.24	Ullman, Buddy, A. Cohen, and D. W. Martin Jr. "Characterization of a cell culture model for the study of adenosine deaminase-and purine nucleoside phosphorylase-deficient immunologic disease." Cell 9.2 (1976): 205-211.
Inosine	Inosine	‘58-63-9	C10H12N4O5	268.23	I4125	Sigmaaldrich	100	268.22	Jurkowitz, Marianne S., et al. "Adenosine, inosine, and guanosine protect glial cells during glucose deprivation and mitochondrial inhibition: correlation between protection and ATP preservation." Journal of neurochemistry 71.2 (1998): 535-548.
Carnosine	Carnosine	‘305-84-0	C9H14N4O3	226.23	C9625	Sigmaaldrich	100	226.23	Pandurangan, Muthuraman, Gansukh Enkhtaivan, and Doo Hwan Kim. "Therapeutic efficacy of natural dipeptide carnosine against human cervical carcinoma cells." Journal of Molecular Recognition 29.9 (2016): 426-435.
Phenyl acetate	Phenyl acetate	‘122-79-2	CH3COOC6H5	136.15	108723	Sigmaaldrich	100	136.1	Schmidt, Friederike, et al. "Lovastatin and phenylacetate induce apoptosis, but not differentiation, in human malignant glioma cells." Acta neuropathologica 101.3 (2001): 217-224.
Phenylalanine	Phenylalanine	‘63-91-2	C6H5CH2CH(NH2)CO2H	165.19	P2126	Sigmaaldrich	420	165.19	Vahrmeijer, Alexander L., et al. "Effect of glutathione depletion on inhibition of cell cycle progression and induction of apoptosis by melphalan (L-phenylalanine mustard) in human colorectal cancer cells." Biochemical pharmacology 58.4 (1999): 655-664.
1-Methylhistidine	1-Methylhistidine	‘332-80-9	C7H11N3O2	169.18	67520	Sigmaaldrich	10	169.18	Troisi, Jacopo, et al. "Urinary metabolomics in pediatric obesity and NAFLD identifies metabolic pathways/metabolites related to dietary habits and gut-liver axis perturbations." Nutrients 9.5 (2017): 485.
3-Methylhistidine	3-Methylhistidine	‘368-16-1	C7H11N3O2	169.18	M9005	Sigmaaldrich	10	169.18	Veronesi, Michael C., et al. "An analog of thyrotropin-releasing hormone (TRH) is neuroprotective against glutamate-induced toxicity in fetal rat hippocampal neurons in vitro." Brain research 1128 (2007): 79-85.
4-Hydroxyproline	4-Hydroxyproline	‘51-35-4	C5H9NO3	131.13	8.16007	Sigmaaldrich	30	131.13	Hall, I. H., and S. Y. Chen. "Substituted 4-hydroxyproline di-and tri-peptides as cytotoxic agents." Amino acids 16.1 (1999): 79-89.
4-Hydroxybutyrate	4-Hydroxybutyrate	‘502-85-2	C4H7NaO3	126.09	G-001	Sigmaaldrich	20	104.1	Shah, Mohsin, et al. "Amorphous amphiphilic P (3HV-co-4HB)-b-mPEG block copolymer synthesized from bacterial copolyester via melt transesterification: nanoparticle preparation, cisplatin-loading for cancer therapy and in vitro evaluation." European journal of pharmaceutics and biopharmaceutics 80.3 (2012): 518-527.
Creatine	Creatine	‘6020-87-7	C4H9N3O2	149.15	C3630	Sigmaaldrich	500	131.13	Wang, Suwei, et al. "Activation of nuclear factor-κB during doxorubicin-induced apoptosis in endothelial cells and myocytes is pro-apoptotic: the role of hydrogen peroxide." Biochemical Journal 367.3 (2002): 729-740.
Tryptophan	Tryptophan	‘153-94-6	C11H12N2O2	204.23	T9753	Sigmaaldrich	25	204.23	Lee, Sun-Mi, et al. "Tryptophan metabolite 3-hydroxyanthranilic acid selectively induces activated T cell death via intracellular GSH depletion." Immunology letters 132.1-2 (2010): 53-60.
Tyrosine	Tyrosine	‘60-18-4	4-(HO)C6H4CH2CH(NH2)CO2H	181.19	T3754	Sigmaaldrich	1000	181.19	Blanchard-Fillion, Béatrice, et al. "Metabolism of 3-nitrotyrosine induces apoptotic death in dopaminergic cells." Journal of Neuroscience 26.23 (2006): 6124-6130.
Methionine	Methionine	‘348-67-4	C5H11NO2S	149.21	M9375	Sigmaaldrich	1000	149.21	Merendino, Nicolò, et al. "Docosahexaenoic acid induces apoptosis in the human PaCa-44 pancreatic cancer cell line by active reduced glutathione extrusion and lipid peroxidation." Nutrition and cancer 52.2 (2005): 225-233.
Glutamate	Glutamate	‘6106-04-3	NaOOCCH2CH2CH(NH2)COOH · H2O	187.13	1446600	Sigmaaldrich	6000	147.13	Cid, Cristina, et al. "Low concentrations of glutamate induce apoptosis in cultured neurons: implications for amyotrophic lateral sclerosis." Journal of the neurological sciences 206.1 (2003): 91-95.
